# Supplementary material
Source: MDPI journal article supplement (https://www.mdpi.com/2304-6740/12/3/73)

## checkCIF/PLATON report

Structure factors have been supplied for datablock(s) a23061303a0229

THIS REPORT IS FOR GUIDANCE ONLY. IF USED AS PART OF A REVIEW PROCEDURE FOR PUBLICATION, IT SHOULD NOT REPLACE THE EXPERTISE OF AN EXPERIENCED CRYSTALLOGRAPHIC REFEREE.

No syntax errors found.      CIF dictionary      Interpreting this report

### Datablock: a23061303a0229

---

Bond precision:      C-C = 0.0064 Å      Wavelength=1.54184

Cell:                      a=10.6791 (3)                      b=12.5175 (4)                      c=13.8170 (4)  
                              alpha=81.202 (2)                      beta=84.247 (2)                      gamma=82.229 (2)  
Temperature:              150 K

|                        | Calculated                         | Reported                                              |
|------------------------|------------------------------------|-------------------------------------------------------|
| Volume                 | 1802.52 (9)                        | 1802.52 (9)                                           |
| Space group            | P -1                               | P -1                                                  |
| Hall group             | -P 1                               | -P 1                                                  |
| Moiety formula         | C34 H32 Ir N4 O2, F6 P [+ solvent] | 0.267 (C34 H28 Ir N4 O2), 0.267 (F6 P), 0.267 [CHCL3] |
| Sum formula            | C34 H32 F6 Ir N4 O2 P [+ solvent]  | C34 H32 F6 Ir N4 O2 P                                 |
| Mr                     | 865.83                             | 865.80                                                |
| Dx, g cm <sup>-3</sup> | 1.595                              | 1.595                                                 |
| Z                      | 2                                  | 2                                                     |
| Mu (mm <sup>-1</sup> ) | 8.171                              | 8.171                                                 |
| F000                   | 852.0                              | 852.0                                                 |
| F000'                  | 845.53                             |                                                       |
| h, k, lmax             | 13, 15, 17                         | 13, 15, 17                                            |
| Nref                   | 7215                               | 6987                                                  |
| Tmin, Tmax             |                                    | 0.090, 0.189                                          |
| Tmin'                  |                                    |                                                       |

Correction method= # Reported T Limits: Tmin=0.090 Tmax=0.189

AbsCorr = SPHERE

Data completeness= 0.968

Theta(max)= 73.055

R(reflections)= 0.0329( 6429)

wR2(reflections)=  
0.0807( 6987)

S = 1.039

Npar= 435

The following ALERTS were generated. Each ALERT has the format

**test-name\_ALERT\_alert-type\_alert-level.**

Click on the hyperlinks for more details of the test.

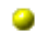

### Alert level C

|                   |                                                  |       |              |
|-------------------|--------------------------------------------------|-------|--------------|
| PLAT094_ALERT_2_C | Ratio of Maximum / Minimum Residual Density .... | 2.11  | Report       |
| PLAT414_ALERT_2_C | Short Intra D-H..H-X H2 ..H4A .                  | 1.90  | Ang.         |
|                   | x,y,z =                                          | 1_555 | Check        |
| PLAT414_ALERT_2_C | Short Intra D-H..H-X H3A ..H17 .                 | 1.91  | Ang.         |
|                   | x,y,z =                                          | 1_555 | Check        |
| PLAT420_ALERT_2_C | D-H Bond Without Acceptor N3 --H3A .             |       | Please Check |
| PLAT420_ALERT_2_C | D-H Bond Without Acceptor N4 --H4B .             |       | Please Check |
| PLAT911_ALERT_3_C | Missing FCF Refl Between Thmin & STh/L= 0.600    | 8     | Report       |
| PLAT971_ALERT_2_C | Check Calcd Resid. Dens. 0.99Ang From Ir1        | 1.51  | eA-3         |

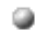

### Alert level G

FORMU01\_ALERT\_1\_G There is a discrepancy between the atom counts in the  
\_chemical\_formula\_sum and \_chemical\_formula\_moiety. This is  
usually due to the moiety formula being in the wrong format.  
Atom count from \_chemical\_formula\_sum: C34 H32 F6 Ir1 N4 O2 P1  
Atom count from \_chemical\_formula\_moiety:C9.345 H7.743 Cl0.801 F1.602

|                   |                                                  |       |              |
|-------------------|--------------------------------------------------|-------|--------------|
| PLAT002_ALERT_2_G | Number of Distance or Angle Restraints on AtSite | 4     | Note         |
| PLAT007_ALERT_5_G | Number of Unrefined Donor-H Atoms .....          | 4     | Report       |
| PLAT042_ALERT_1_G | Calc. and Reported MoietyFormula Strings Differ  |       | Please Check |
| PLAT154_ALERT_1_G | The s.u.'s on the Cell Angles are Equal ..(Note) | 0.002 | Degree       |
| PLAT172_ALERT_4_G | The CIF-Embedded .res File Contains DFIX Records | 3     | Report       |
| PLAT244_ALERT_4_G | Low 'Solvent' Ueq as Compared to Neighbors of    | P1    | Check        |
| PLAT605_ALERT_4_G | Largest Solvent Accessible VOID in the Structure | 264   | A**3         |
| PLAT860_ALERT_3_G | Number of Least-Squares Restraints .....         | 3     | Note         |
| PLAT868_ALERT_4_G | ALERTS Due to the Use of _smtbx_masks Suppressed |       | ! Info       |
| PLAT912_ALERT_4_G | Missing # of FCF Reflections Above STh/L= 0.600  | 220   | Note         |
| PLAT941_ALERT_3_G | Average HKL Measurement Multiplicity .....       | 1.8   | Low          |
| PLAT978_ALERT_2_G | Number C-C Bonds with Positive Residual Density. | 4     | Info         |

- 0 **ALERT level A** = Most likely a serious problem - resolve or explain  
0 **ALERT level B** = A potentially serious problem, consider carefully  
7 **ALERT level C** = Check. Ensure it is not caused by an omission or oversight  
13 **ALERT level G** = General information/check it is not something unexpected

- 3 ALERT type 1 CIF construction/syntax error, inconsistent or missing data  
8 ALERT type 2 Indicator that the structure model may be wrong or deficient  
3 ALERT type 3 Indicator that the structure quality may be low  
5 ALERT type 4 Improvement, methodology, query or suggestion  
1 ALERT type 5 Informative message, check

It is advisable to attempt to resolve as many as possible of the alerts in all categories. Often the minor alerts point to easily fixed oversights, errors and omissions in your CIF or refinement strategy, so attention to these fine details can be worthwhile. In order to resolve some of the more serious problems it may be necessary to carry out additional measurements or structure refinements. However, the purpose of your study may justify the reported deviations and the more serious of these should normally be commented upon in the discussion or experimental section of a paper or in the "special\_details" fields of the CIF. checkCIF was carefully designed to identify outliers and unusual parameters, but every test has its limitations and alerts that are not important in a particular case may appear. Conversely, the absence of alerts does not guarantee there are no aspects of the results needing attention. It is up to the individual to critically assess their own results and, if necessary, seek expert advice.

### **Publication of your CIF in IUCr journals**

A basic structural check has been run on your CIF. These basic checks will be run on all CIFs submitted for publication in IUCr journals (*Acta Crystallographica*, *Journal of Applied Crystallography*, *Journal of Synchrotron Radiation*); however, if you intend to submit to *Acta Crystallographica Section C* or *E* or *IUCrData*, you should make sure that full publication checks are run on the final version of your CIF prior to submission.

### **Publication of your CIF in other journals**

Please refer to the *Notes for Authors* of the relevant journal for any special instructions relating to CIF submission.

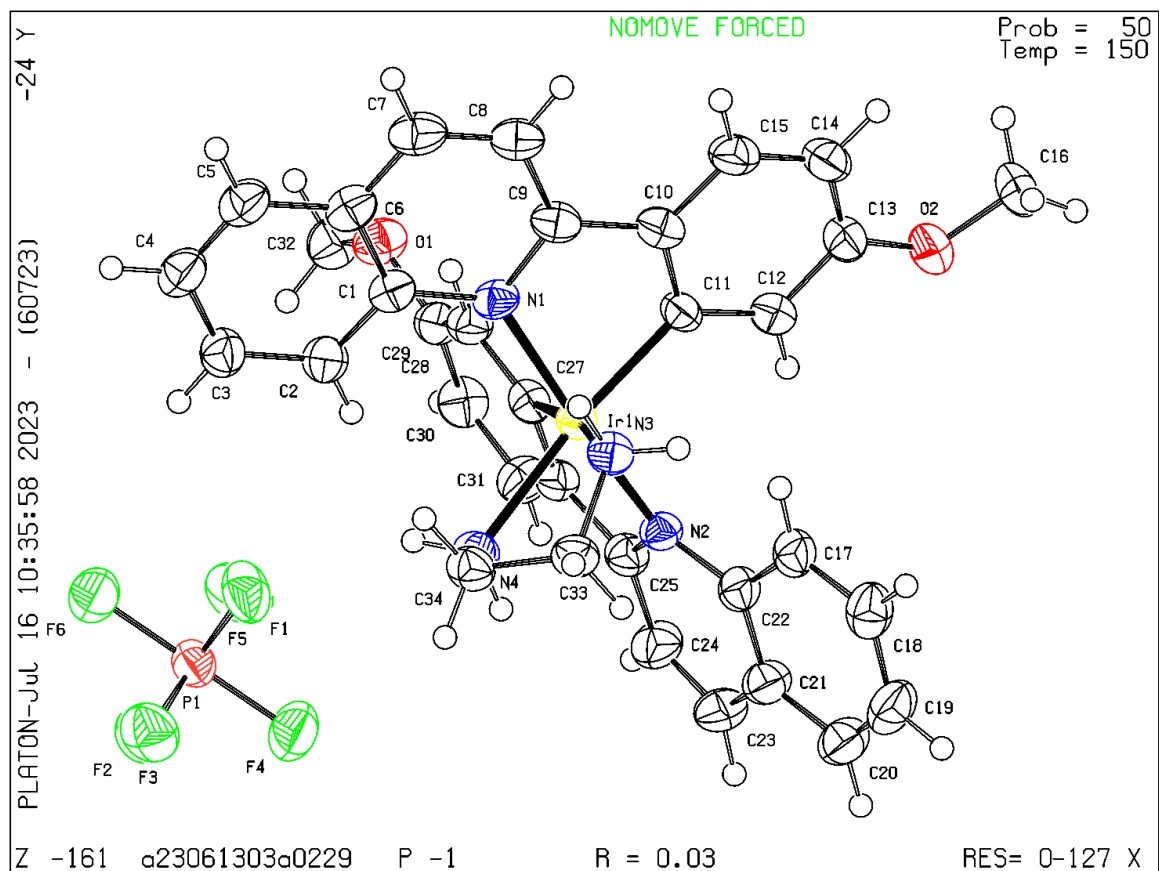

Supplement: s1 [file s1]
