# Supplementary material
Source: MDPI journal article supplement (https://www.mdpi.com/2304-6740/12/3/73)
Supplement: s1 [file s1]

Archive with 7 entries (7 files):
- rac-[Ir(bmpqen)](PF6)/3.cif
- rac-[Ir(bmpqen)](PF6)/3_cifreport.pdf
- rac-[Ir(fpq)2(en)](PF6)/1a.cif
- rac-[Ir(fpq)2(en)](PF6)/1a_cifreport.pdf
- rac-[Ir(mpq)2(en)](PF6)/3a.cif
- rac-[Ir(mpq)2(en)](PF6)/3a_cifreport.pdf
- Supporting Information.pdf
