# Supplementary material
Source: MDPI journal article supplement (https://www.mdpi.com/2304-6740/12/3/73)
Supplement: s1 [file s1 › rac-[Ir(bmpqen)](PF6)/3.cif]

data_exp_3482
_audit_creation_date               2023-08-24
_audit_creation_method
;
Olex2 1.5
(compiled 2023.03.06 svn.rbb2c1857 for OlexSys, GUI svn.r6748)
;
_shelx_SHELXL_version_number       '2018/3'
_audit_contact_author_address      ?
_audit_contact_author_email        ?
_audit_contact_author_name         ''
_audit_contact_author_phone        ?
_publ_contact_author_id_orcid      ?
_publ_section_references
;
Bourhis, L.J., Dolomanov, O.V., Gildea, R.J., Howard, J.A.K., Puschmann, H.
 (2015). Acta Cryst. A71, 59-75.

Dolomanov, O.V., Bourhis, L.J., Gildea, R.J, Howard, J.A.K. & Puschmann, H.
 (2009), J. Appl. Cryst. 42, 339-341.

Sheldrick, G.M. (2015). Acta Cryst. C71, 3-8.
;
_chemical_name_common              ?
_chemical_name_systematic          ?
_chemical_formula_moiety          
 '0.267(C34 H28 Ir N4 O2), 0.267(F6 P), 0.267[CHCl3]'
_chemical_formula_sum              'C34 H28 F6 Ir N4 O2 P'
_chemical_formula_weight           861.77
_chemical_melting_point            ?
_chemical_oxdiff_usercomment       67B_18C6
loop_
  _atom_type_symbol
  _atom_type_description
  _atom_type_scat_dispersion_real
  _atom_type_scat_dispersion_imag
  _atom_type_scat_source
 'C' 'C' 0.0181 0.0091 'International Tables Vol C Tables 4.2.6.8 and 6.1.1.4'
 'H' 'H' 0.0000 0.0000 'International Tables Vol C Tables 4.2.6.8 and 6.1.1.4'
 'F' 'F' 0.0727 0.0534 'International Tables Vol C Tables 4.2.6.8 and 6.1.1.4'
 'Ir' 'Ir' -4.7710 6.5667
 'International Tables Vol C Tables 4.2.6.8 and 6.1.1.4'
 'N' 'N' 0.0311 0.0180 'International Tables Vol C Tables 4.2.6.8 and 6.1.1.4'
 'O' 'O' 0.0492 0.0322 'International Tables Vol C Tables 4.2.6.8 and 6.1.1.4'
 'P' 'P' 0.2955 0.4335 'International Tables Vol C Tables 4.2.6.8 and 6.1.1.4'

_shelx_space_group_comment
;
The symmetry employed for this shelxl refinement is uniquely defined
by the following loop, which should always be used as a source of
symmetry information in preference to the above space-group names.
They are only intended as comments.
;
_space_group_crystal_system        'monoclinic'
_space_group_IT_number             14
_space_group_name_H-M_alt          'P 1 21/n 1'
_space_group_name_Hall             '-P 2yn'
loop_
  _space_group_symop_operation_xyz
 'x, y, z'
 '-x+1/2, y+1/2, -z+1/2'
 '-x, -y, -z'
 'x-1/2, -y-1/2, z-1/2'

_cell_length_a                     10.58160(10)
_cell_length_b                     18.5399(2)
_cell_length_c                     17.3118(2)
_cell_angle_alpha                  90
_cell_angle_beta                   90.3740(10)
_cell_angle_gamma                  90
_cell_volume                       3396.19(6)
_cell_formula_units_Z              4
_cell_measurement_reflns_used      11713
_cell_measurement_temperature      149.98(10)
_cell_measurement_theta_max        72.9190
_cell_measurement_theta_min        3.4180
_shelx_estimated_absorpt_T_max     ?
_shelx_estimated_absorpt_T_min     ?
_exptl_absorpt_coefficient_mu      8.674
_exptl_absorpt_correction_T_max    1.00000
_exptl_absorpt_correction_T_min    0.56223
_exptl_absorpt_correction_type     multi-scan
_exptl_absorpt_process_details
;
CrysAlisPro 1.171.40.84a (Rigaku Oxford Diffraction, 2020)
Empirical absorption correction using spherical harmonics,
implemented in SCALE3 ABSPACK scaling algorithm.
;
_exptl_absorpt_special_details     ?
_exptl_crystal_colour              red
_exptl_crystal_colour_primary      red
_exptl_crystal_density_diffrn      1.685
_exptl_crystal_density_meas        ?
_exptl_crystal_density_method      ?
_exptl_crystal_description         BLOCK
_exptl_crystal_F_000               1688
_exptl_crystal_size_max            0.1
_exptl_crystal_size_mid            0.06
_exptl_crystal_size_min            0.04
_exptl_transmission_factor_max     ?
_exptl_transmission_factor_min     ?
_diffrn_reflns_av_R_equivalents    0.0694
_diffrn_reflns_av_unetI/netI       0.0609
_diffrn_reflns_Laue_measured_fraction_full  1.000
_diffrn_reflns_Laue_measured_fraction_max  0.987
_diffrn_reflns_limit_h_max         13
_diffrn_reflns_limit_h_min         -13
_diffrn_reflns_limit_k_max         23
_diffrn_reflns_limit_k_min         -22
_diffrn_reflns_limit_l_max         14
_diffrn_reflns_limit_l_min         -21
_diffrn_reflns_number              28356
_diffrn_reflns_point_group_measured_fraction_full  1.000
_diffrn_reflns_point_group_measured_fraction_max  0.987
_diffrn_reflns_theta_full          67.684
_diffrn_reflns_theta_max           73.048
_diffrn_reflns_theta_min           3.493
_diffrn_ambient_environment        N~2~
_diffrn_ambient_temperature        149.98(10)
_diffrn_detector                   'CCD plate'
_diffrn_detector_area_resol_mean   5.2913
_diffrn_detector_type              AtlasS2
_diffrn_measured_fraction_theta_full  1.000
_diffrn_measured_fraction_theta_max  0.987
_diffrn_measurement_details
;
List of Runs (angles in degrees, time in seconds):

  # Type    Start    End  Width  t~exp~   \w     \q     \k     \f   Frames
--------------------------------------------------------------------------
  1  \w    -77.00 -52.00   1.00    2.00    --  -41.39 125.00 -30.00   25
  2  \w    -66.00  32.00   1.00    2.00    --  -41.39  38.00 150.00   98
  3  \w     93.00 122.00   1.00    2.00    --   41.39 170.00 -33.00   29
  4  \w     12.00  50.00   1.00    2.00    --   41.39 -77.00 -90.00   38
  5  \w     42.00 110.00   1.00    8.00    --  105.29-125.00-180.00   68
  6  \w     86.00 147.00   1.00    8.00    --  105.29  45.00  30.00   61
  7  \w    111.00 161.00   1.00    8.00    --  105.29 125.00   0.00   50
  8  \w     32.00 104.00   1.00    8.00    --  105.29 -30.00-150.00   72
  9  \w    -64.00 -15.00   1.00    2.00    --  -41.39 125.00   0.00   49
 10  \w    -20.00  10.00   1.00    2.00    --   41.39 -77.00 -60.00   30
 11  \w    111.00 149.00   1.00    8.00    --  105.29  77.00 -60.00   38
 12  \w     73.00 111.00   1.00    8.00    --  105.29-125.00 -60.00   38
 13  \w     58.00  94.00   1.00    8.00    --  105.29-125.00   0.00   36
 14  \w    108.00 140.00   1.00    8.00    --  105.29  77.00 150.00   32
 15  \w    113.00 162.00   1.00    8.00    --  105.29  77.00-180.00   49
 16  \w     84.00 129.00   1.00    8.00    --  105.29 -45.00  90.00   45
 17  \w   -106.00 -70.00   1.00    2.00    --  -41.39 -57.00  60.00   36
 18  \w   -108.00 -34.00   1.00    2.00    --  -41.39 -38.00 -30.00   74
 19  \w    -47.00  -6.00   1.00    2.00    --  -41.39 125.00-180.00   41
 20  \w     52.00  91.00   1.00    2.00    --   41.39-125.00-180.00   39
 21  \w    148.00 178.00   1.00    8.00    --  105.29  77.00 -60.00   30
 22  \w     24.00  49.00   1.00    8.00    --  105.29 -94.00   0.00   25
 23  \w    114.00 150.00   1.00    8.00    --  105.29  77.00-120.00   36
 24  \w     23.00  59.00   1.00    8.00    --  105.29 -94.00-180.00   36
 25  \w    103.00 129.00   1.00    8.00    --  105.29  77.00 -60.00   26
 26  \w     75.00 106.00   1.00    8.00    --  105.29 -94.00-180.00   31
 27  \w     98.00 144.00   1.00    8.00    --  105.29 125.00-120.00   46
 28  \w    108.00 143.00   1.00    8.00    --  105.29  77.00  30.00   35
 29  \w     26.00 106.00   1.00    8.00    --  105.29 -94.00  90.00   80
 30  \w     47.00  73.00   1.00    8.00    --  105.29 -94.00 -60.00   26
 31  \w     81.00 106.00   1.00    8.00    --  105.29 -94.00 -60.00   25
 32  \w     81.00 106.00   1.00    8.00    --  105.29 -94.00   0.00   25
 33  \w     81.00 107.00   1.00    8.00    --  105.29-115.00-173.00   26
 34  \w     87.00 112.00   1.00    8.00    --  105.29-125.00 -60.00   25
;
_diffrn_measurement_device         'four-circle diffractometer'
_diffrn_measurement_device_type    'SuperNova, Dual, Cu at home/near, AtlasS2'
_diffrn_measurement_method         '\w scans'
_diffrn_orient_matrix_type        
 'CrysAlisPro convention (1999,Acta A55,543-557)'
_diffrn_orient_matrix_UB_11        0.1089805000
_diffrn_orient_matrix_UB_12        -0.0515497000
_diffrn_orient_matrix_UB_13        0.0212843000
_diffrn_orient_matrix_UB_21        -0.0934632000
_diffrn_orient_matrix_UB_22        -0.0637349000
_diffrn_orient_matrix_UB_23        0.0014496000
_diffrn_orient_matrix_UB_31        0.0243306000
_diffrn_orient_matrix_UB_32        -0.0137119000
_diffrn_orient_matrix_UB_33        -0.0863617000
_diffrn_radiation_monochromator    mirror
_diffrn_radiation_probe            x-ray
_diffrn_radiation_type             'Cu K\a'
_diffrn_radiation_wavelength       1.54184
_diffrn_source                     'micro-focus sealed X-ray tube'
_diffrn_source_current             3.57
_diffrn_source_power               0.24954300000000001
_diffrn_source_type                'SuperNova (Cu) X-ray Source'
_diffrn_source_voltage             69.9
_reflns_Friedel_coverage           0.000
_reflns_Friedel_fraction_full      .
_reflns_Friedel_fraction_max       .
_reflns_number_gt                  5530
_reflns_number_total               6708
_reflns_special_details
;
 Reflections were merged by SHELXL according to the crystal
 class for the calculation of statistics and refinement.
 
 Structure factors included contributions from the .fab file.
 
 _reflns_Friedel_fraction is defined as the number of unique
 Friedel pairs measured divided by the number that would be
 possible theoretically, ignoring centric projections and
 systematic absences.
;
_reflns_threshold_expression       'I > 2\s(I)'
_computing_cell_refinement         'CrysAlisPro 1.171.40.84a (Rigaku OD, 2020)'
_computing_data_collection         'CrysAlisPro 1.171.40.84a (Rigaku OD, 2020)'
_computing_data_reduction          'CrysAlisPro 1.171.40.84a (Rigaku OD, 2020)'
_computing_molecular_graphics      'Olex2 1.5 (Dolomanov et al., 2009)'
_computing_publication_material    'Olex2 1.5 (Dolomanov et al., 2009)'
_computing_structure_refinement    'SHELXL 2018/3 (Sheldrick, 2015)'
_computing_structure_solution      'olex2.solve 1.5 (Bourhis et al., 2015)'
_refine_diff_density_max           1.134
_refine_diff_density_min           -0.994
_refine_diff_density_rms           0.157
_refine_ls_extinction_coef         .
_refine_ls_extinction_method       none
_refine_ls_goodness_of_fit_ref     1.062
_refine_ls_hydrogen_treatment      constr
_refine_ls_matrix_type             full
_refine_ls_number_parameters       435
_refine_ls_number_reflns           6708
_refine_ls_number_restraints       0
_refine_ls_R_factor_all            0.0533
_refine_ls_R_factor_gt             0.0392
_refine_ls_restrained_S_all        1.062
_refine_ls_shift/su_max            0.001
_refine_ls_shift/su_mean           0.000
_refine_ls_structure_factor_coef   Fsqd
_refine_ls_weighting_details      
 'w=1/[\s^2^(Fo^2^)+(0.0449P)^2^+8.4109P] where P=(Fo^2^+2Fc^2^)/3'
_refine_ls_weighting_scheme        calc
_refine_ls_wR_factor_gt            0.0958
_refine_ls_wR_factor_ref           0.1009
_refine_special_details            ?
_olex2_refinement_description
;
1.a Ternary CH refined with riding coordinates:
 N3(H3), N4(H4)
1.b Secondary CH2 refined with riding coordinates:
 C34(H34A,H34B), C33(H33A,H33B)
1.c Aromatic/amide H refined with riding coordinates:
 C28(H28), C15(H15), C24(H24), C7(H7), C8(H8), C12(H12), C3(H3A), C14(H14),
 C31(H31), C21(H21), C23(H23), C4(H4A), C5(H5), C30(H30), C19(H19), C20(H20)
1.d Idealised Me refined as rotating group:
 C16(H16A,H16B,H16C), C32(H32A,H32B,H32C)
;
_atom_sites_solution_hydrogens     geom
_atom_sites_solution_primary       iterative
_atom_sites_solution_secondary     ?
loop_
  _atom_site_label
  _atom_site_type_symbol
  _atom_site_fract_x
  _atom_site_fract_y
  _atom_site_fract_z
  _atom_site_U_iso_or_equiv
  _atom_site_adp_type
  _atom_site_occupancy
  _atom_site_site_symmetry_order
  _atom_site_calc_flag
  _atom_site_refinement_flags_posn
  _atom_site_refinement_flags_adp
  _atom_site_refinement_flags_occupancy
  _atom_site_disorder_assembly
  _atom_site_disorder_group
 Ir1 Ir 0.48884(2) 0.42172(2) 0.77788(2) 0.01594(8) Uani 1 1 d . . . . .
 P1 P -0.22884(14) 0.25832(8) 0.54361(8) 0.0246(3) Uani 1 1 d . . . . .
 F4 F -0.2320(4) 0.3217(2) 0.4826(2) 0.0373(9) Uani 1 1 d . . . . .
 F2 F -0.1569(4) 0.3099(2) 0.6034(2) 0.0425(10) Uani 1 1 d . . . . .
 F6 F -0.3617(4) 0.2848(3) 0.5772(2) 0.0457(10) Uani 1 1 d . . . . .
 F1 F -0.2245(5) 0.1953(2) 0.6065(2) 0.0472(11) Uani 1 1 d . . . . .
 O2 O 0.0939(4) 0.5849(3) 0.8757(3) 0.0307(9) Uani 1 1 d . . . . .
 O1 O 0.6547(4) 0.6640(2) 0.6303(2) 0.0296(9) Uani 1 1 d . . . . .
 N2 N 0.3504(4) 0.3901(3) 0.7064(3) 0.0220(9) Uani 1 1 d . . . . .
 N1 N 0.6283(4) 0.4569(2) 0.8467(2) 0.0182(9) Uani 1 1 d . . . . .
 F3 F -0.0959(4) 0.2324(3) 0.5097(2) 0.0511(11) Uani 1 1 d . . . . .
 F5 F -0.2998(5) 0.2065(3) 0.4843(2) 0.0564(13) Uani 1 1 d . . . . .
 N3 N 0.6457(4) 0.3479(3) 0.7424(3) 0.0216(9) Uani 1 1 d . . . . .
 H3 H 0.661283 0.352599 0.685718 0.026 Uiso 1 1 calc R U . . .
 N4 N 0.4288(4) 0.3196(3) 0.8360(2) 0.0206(9) Uani 1 1 d . . . . .
 H4 H 0.398340 0.330326 0.889397 0.025 Uiso 1 1 calc R U . . .
 C27 C 0.5025(5) 0.4993(3) 0.6960(3) 0.0184(10) Uani 1 1 d . . . . .
 C11 C 0.3928(5) 0.4946(3) 0.8409(3) 0.0193(10) Uani 1 1 d . . . . .
 C10 C 0.4718(5) 0.5327(3) 0.8942(3) 0.0184(10) Uani 1 1 d . . . . .
 C1 C 0.7457(5) 0.4274(3) 0.8395(3) 0.0185(10) Uani 1 1 d . . . . .
 C17 C 0.2862(5) 0.3277(3) 0.7228(3) 0.0175(10) Uani 1 1 d . . . . .
 C28 C 0.5813(5) 0.5591(3) 0.6913(3) 0.0214(11) Uani 1 1 d . . . . .
 H28 H 0.642396 0.567505 0.730759 0.026 Uiso 1 1 calc R U . . .
 C18 C 0.3250(5) 0.2884(3) 0.7891(3) 0.0224(11) Uani 1 1 d . . . . .
 C25 C 0.3253(5) 0.4298(3) 0.6438(3) 0.0227(11) Uani 1 1 d . . . . .
 C29 C 0.5714(5) 0.6069(3) 0.6291(3) 0.0223(11) Uani 1 1 d . . . . .
 C15 C 0.4248(6) 0.5883(3) 0.9399(3) 0.0245(11) Uani 1 1 d . . . . .
 H15 H 0.479417 0.612834 0.974877 0.029 Uiso 1 1 calc R U . . .
 C22 C 0.1881(5) 0.3031(3) 0.6738(3) 0.0252(12) Uani 1 1 d . . . . .
 C24 C 0.2243(6) 0.4084(4) 0.5946(3) 0.0285(13) Uani 1 1 d . . . . .
 H24 H 0.202673 0.437378 0.551227 0.034 Uiso 1 1 calc R U . . .
 C7 C 0.8230(5) 0.5097(3) 0.9354(3) 0.0261(12) Uani 1 1 d . . . . .
 H7 H 0.890220 0.528932 0.965652 0.031 Uiso 1 1 calc R U . . .
 C8 C 0.7048(6) 0.5379(3) 0.9421(3) 0.0247(12) Uani 1 1 d . . . . .
 H8 H 0.689613 0.575823 0.977813 0.030 Uiso 1 1 calc R U . . .
 C9 C 0.6040(6) 0.5107(3) 0.8959(3) 0.0223(11) Uani 1 1 d . . . . .
 C2 C 0.7584(5) 0.3705(3) 0.7861(3) 0.0231(11) Uani 1 1 d . . . . .
 C13 C 0.2207(5) 0.5706(3) 0.8844(3) 0.0221(11) Uani 1 1 d . . . . .
 C12 C 0.2664(5) 0.5149(3) 0.8374(3) 0.0195(10) Uani 1 1 d . . . . .
 H12 H 0.210429 0.490804 0.802894 0.023 Uiso 1 1 calc R U . . .
 C6 C 0.8470(5) 0.4524(3) 0.8842(3) 0.0247(12) Uani 1 1 d . . . . .
 C3 C 0.8752(6) 0.3392(4) 0.7773(3) 0.0266(12) Uani 1 1 d . . . . .
 H3A H 0.886323 0.301484 0.740740 0.032 Uiso 1 1 calc R U . . .
 C16 C 0.0469(6) 0.6506(4) 0.9088(4) 0.0319(13) Uani 1 1 d . . . . .
 H16A H 0.101725 0.690811 0.893908 0.048 Uiso 1 1 calc R U . . .
 H16B H 0.046216 0.646286 0.965246 0.048 Uiso 1 1 calc R U . . .
 H16C H -0.039143 0.659556 0.889929 0.048 Uiso 1 1 calc R U . . .
 C14 C 0.2994(6) 0.6080(3) 0.9346(3) 0.0241(11) Uani 1 1 d . . . . .
 H14 H 0.267459 0.646644 0.964799 0.029 Uiso 1 1 calc R U . . .
 C26 C 0.4078(5) 0.4917(3) 0.6364(3) 0.0229(11) Uani 1 1 d . . . . .
 C31 C 0.4005(6) 0.5399(3) 0.5758(3) 0.0283(12) Uani 1 1 d . . . . .
 H31 H 0.338130 0.533209 0.536752 0.034 Uiso 1 1 calc R U . . .
 C21 C 0.1293(6) 0.2373(4) 0.6932(4) 0.0323(13) Uani 1 1 d . . . . .
 H21 H 0.063000 0.219047 0.661495 0.039 Uiso 1 1 calc R U . . .
 C23 C 0.1582(6) 0.3472(4) 0.6086(3) 0.0296(13) Uani 1 1 d . . . . .
 H23 H 0.091296 0.333575 0.574751 0.035 Uiso 1 1 calc R U . . .
 C4 C 0.9791(6) 0.3631(4) 0.8227(3) 0.0304(13) Uani 1 1 d . . . . .
 H4A H 1.059021 0.340392 0.817364 0.036 Uiso 1 1 calc R U . . .
 C5 C 0.9658(5) 0.4180(4) 0.8737(3) 0.0273(12) Uani 1 1 d . . . . .
 H5 H 1.036923 0.433695 0.902906 0.033 Uiso 1 1 calc R U . . .
 C30 C 0.4821(6) 0.5977(3) 0.5709(3) 0.0285(12) Uani 1 1 d . . . . .
 H30 H 0.477284 0.630387 0.528783 0.034 Uiso 1 1 calc R U . . .
 C34 C 0.5416(6) 0.2715(3) 0.8397(3) 0.0259(12) Uani 1 1 d . . . . .
 H34A H 0.515171 0.221766 0.852754 0.031 Uiso 1 1 calc R U . . .
 H34B H 0.600692 0.288583 0.880278 0.031 Uiso 1 1 calc R U . . .
 C19 C 0.2661(6) 0.2253(3) 0.8053(3) 0.0280(12) Uani 1 1 d . . . . .
 H19 H 0.291345 0.198000 0.849223 0.034 Uiso 1 1 calc R U . . .
 C20 C 0.1668(6) 0.1999(3) 0.7570(4) 0.0304(13) Uani 1 1 d . . . . .
 H20 H 0.125620 0.155916 0.769406 0.036 Uiso 1 1 calc R U . . .
 C33 C 0.6073(5) 0.2719(3) 0.7614(3) 0.0263(12) Uani 1 1 d . . . . .
 H33A H 0.682803 0.240442 0.763255 0.032 Uiso 1 1 calc R U . . .
 H33B H 0.549204 0.253303 0.721048 0.032 Uiso 1 1 calc R U . . .
 C32 C 0.6411(7) 0.7163(4) 0.5699(4) 0.0366(15) Uani 1 1 d . . . . .
 H32A H 0.658281 0.693545 0.520000 0.055 Uiso 1 1 calc R U . . .
 H32B H 0.701058 0.755822 0.578596 0.055 Uiso 1 1 calc R U . . .
 H32C H 0.554731 0.735341 0.569945 0.055 Uiso 1 1 calc R U . . .

loop_
  _atom_site_aniso_label
  _atom_site_aniso_U_11
  _atom_site_aniso_U_22
  _atom_site_aniso_U_33
  _atom_site_aniso_U_23
  _atom_site_aniso_U_13
  _atom_site_aniso_U_12
 Ir1 0.01467(11) 0.01798(11) 0.01515(11) -0.00067(9) -0.00069(7) 0.00094(9)
 P1 0.0298(7) 0.0238(7) 0.0202(6) 0.0011(6) 0.0006(5) -0.0024(6)
 F4 0.043(2) 0.038(2) 0.0318(18) 0.0140(16) 0.0048(16) 0.0016(17)
 F2 0.048(2) 0.040(2) 0.039(2) -0.0091(18) -0.0100(18) -0.0105(19)
 F6 0.032(2) 0.064(3) 0.040(2) 0.006(2) 0.0062(16) 0.003(2)
 F1 0.076(3) 0.034(2) 0.0320(19) 0.0098(17) -0.0001(19) -0.002(2)
 O2 0.020(2) 0.036(2) 0.037(2) -0.0059(19) 0.0026(17) 0.0089(18)
 O1 0.027(2) 0.027(2) 0.035(2) 0.0094(18) -0.0041(17) -0.0069(17)
 N2 0.020(2) 0.021(2) 0.025(2) -0.0022(19) -0.0011(18) 0.0038(19)
 N1 0.020(2) 0.023(2) 0.0116(18) 0.0023(17) -0.0010(16) 0.0000(18)
 F3 0.048(3) 0.060(3) 0.046(2) 0.006(2) 0.0143(19) 0.022(2)
 F5 0.080(4) 0.053(3) 0.036(2) -0.007(2) -0.008(2) -0.027(3)
 N3 0.017(2) 0.023(2) 0.025(2) -0.0034(19) -0.0025(18) 0.0032(18)
 N4 0.023(2) 0.022(2) 0.016(2) 0.0029(18) 0.0014(17) 0.0002(19)
 C27 0.015(2) 0.022(2) 0.018(2) 0.000(2) 0.0028(19) 0.002(2)
 C11 0.019(3) 0.021(2) 0.018(2) 0.007(2) 0.0023(19) 0.002(2)
 C10 0.025(3) 0.015(2) 0.016(2) 0.005(2) 0.004(2) -0.004(2)
 C1 0.017(2) 0.026(3) 0.013(2) 0.003(2) 0.0007(18) -0.001(2)
 C17 0.017(2) 0.016(2) 0.020(2) -0.004(2) 0.0032(19) 0.0005(19)
 C28 0.016(2) 0.025(3) 0.023(3) 0.004(2) 0.004(2) -0.001(2)
 C18 0.017(2) 0.025(3) 0.025(3) -0.006(2) 0.005(2) -0.001(2)
 C25 0.021(3) 0.028(3) 0.020(2) -0.001(2) -0.006(2) 0.004(2)
 C29 0.019(3) 0.024(3) 0.024(3) 0.003(2) 0.005(2) 0.001(2)
 C15 0.028(3) 0.025(3) 0.021(2) -0.002(2) -0.003(2) -0.002(2)
 C22 0.021(3) 0.029(3) 0.025(3) -0.010(2) 0.004(2) 0.001(2)
 C24 0.025(3) 0.037(3) 0.024(3) 0.003(2) -0.010(2) -0.005(3)
 C7 0.020(3) 0.032(3) 0.026(3) 0.003(2) -0.006(2) -0.008(2)
 C8 0.027(3) 0.025(3) 0.022(3) -0.004(2) -0.003(2) -0.005(2)
 C9 0.025(3) 0.019(2) 0.023(3) 0.004(2) -0.004(2) -0.003(2)
 C2 0.019(3) 0.030(3) 0.021(2) 0.003(2) -0.001(2) 0.005(2)
 C13 0.018(3) 0.024(3) 0.024(3) 0.006(2) 0.004(2) 0.001(2)
 C12 0.019(3) 0.024(3) 0.015(2) 0.001(2) 0.0051(19) 0.000(2)
 C6 0.021(3) 0.029(3) 0.024(3) 0.007(2) -0.003(2) -0.004(2)
 C3 0.021(3) 0.034(3) 0.025(3) 0.001(2) 0.003(2) 0.005(2)
 C16 0.033(3) 0.031(3) 0.032(3) -0.009(3) 0.007(3) 0.014(3)
 C14 0.029(3) 0.021(3) 0.022(3) 0.000(2) 0.004(2) 0.003(2)
 C26 0.018(3) 0.029(3) 0.021(2) -0.001(2) -0.002(2) 0.001(2)
 C31 0.029(3) 0.032(3) 0.024(3) 0.002(2) -0.009(2) -0.001(2)
 C21 0.023(3) 0.037(3) 0.037(3) -0.018(3) 0.006(2) 0.000(3)
 C23 0.022(3) 0.038(3) 0.029(3) -0.011(3) -0.007(2) -0.001(3)
 C4 0.018(3) 0.045(4) 0.028(3) 0.002(3) 0.001(2) 0.009(3)
 C5 0.018(3) 0.038(3) 0.025(3) 0.010(3) -0.002(2) -0.007(2)
 C30 0.032(3) 0.031(3) 0.023(3) 0.008(2) -0.004(2) 0.002(3)
 C34 0.025(3) 0.023(3) 0.030(3) 0.006(2) -0.003(2) 0.005(2)
 C19 0.032(3) 0.027(3) 0.025(3) 0.001(2) 0.005(2) -0.003(2)
 C20 0.035(3) 0.026(3) 0.030(3) 0.001(3) 0.008(2) -0.006(3)
 C33 0.021(3) 0.023(3) 0.035(3) -0.010(2) -0.003(2) 0.008(2)
 C32 0.041(4) 0.030(3) 0.039(3) 0.005(3) -0.009(3) -0.001(3)

_geom_special_details
;
 All esds (except the esd in the dihedral angle between two l.s. planes)
 are estimated using the full covariance matrix.  The cell esds are taken
 into account individually in the estimation of esds in distances, angles
 and torsion angles; correlations between esds in cell parameters are only
 used when they are defined by crystal symmetry.  An approximate (isotropic)
 treatment of cell esds is used for estimating esds involving l.s. planes.
;
loop_
  _geom_bond_atom_site_label_1
  _geom_bond_atom_site_label_2
  _geom_bond_distance
  _geom_bond_site_symmetry_2
  _geom_bond_publ_flag
 Ir1 N2 1.999(5) . ?
 Ir1 N1 2.000(4) . ?
 Ir1 N3 2.240(5) . ?
 Ir1 N4 2.238(5) . ?
 Ir1 C27 2.025(5) . ?
 Ir1 C11 2.016(5) . ?
 P1 F4 1.581(4) . ?
 P1 F2 1.599(4) . ?
 P1 F6 1.602(4) . ?
 P1 F1 1.598(4) . ?
 P1 F3 1.601(4) . ?
 P1 F5 1.591(4) . ?
 O2 C13 1.375(7) . ?
 O2 C16 1.437(7) . ?
 O1 C29 1.377(7) . ?
 O1 C32 1.432(8) . ?
 N2 C17 1.372(7) . ?
 N2 C25 1.335(7) . ?
 N1 C1 1.364(7) . ?
 N1 C9 1.338(8) . ?
 N3 H3 1.0000 . ?
 N3 C2 1.469(7) . ?
 N3 C33 1.503(8) . ?
 N4 H4 1.0000 . ?
 N4 C18 1.480(7) . ?
 N4 C34 1.492(7) . ?
 C27 C28 1.389(8) . ?
 C27 C26 1.441(7) . ?
 C11 C10 1.429(8) . ?
 C11 C12 1.391(8) . ?
 C10 C15 1.393(8) . ?
 C10 C9 1.457(8) . ?
 C1 C2 1.410(8) . ?
 C1 C6 1.397(8) . ?
 C17 C18 1.418(8) . ?
 C17 C22 1.412(8) . ?
 C28 H28 0.9500 . ?
 C28 C29 1.399(8) . ?
 C18 C19 1.356(9) . ?
 C25 C24 1.419(8) . ?
 C25 C26 1.448(8) . ?
 C29 C30 1.387(8) . ?
 C15 H15 0.9500 . ?
 C15 C14 1.379(8) . ?
 C22 C21 1.411(9) . ?
 C22 C23 1.427(9) . ?
 C24 H24 0.9500 . ?
 C24 C23 1.355(9) . ?
 C7 H7 0.9500 . ?
 C7 C8 1.362(9) . ?
 C7 C6 1.407(9) . ?
 C8 H8 0.9500 . ?
 C8 C9 1.421(8) . ?
 C2 C3 1.375(8) . ?
 C13 C12 1.403(8) . ?
 C13 C14 1.385(8) . ?
 C12 H12 0.9500 . ?
 C6 C5 1.423(9) . ?
 C3 H3A 0.9500 . ?
 C3 C4 1.419(9) . ?
 C16 H16A 0.9800 . ?
 C16 H16B 0.9800 . ?
 C16 H16C 0.9800 . ?
 C14 H14 0.9500 . ?
 C26 C31 1.380(8) . ?
 C31 H31 0.9500 . ?
 C31 C30 1.379(9) . ?
 C21 H21 0.9500 . ?
 C21 C20 1.361(10) . ?
 C23 H23 0.9500 . ?
 C4 H4A 0.9500 . ?
 C4 C5 1.354(10) . ?
 C5 H5 0.9500 . ?
 C30 H30 0.9500 . ?
 C34 H34A 0.9900 . ?
 C34 H34B 0.9900 . ?
 C34 C33 1.526(8) . ?
 C19 H19 0.9500 . ?
 C19 C20 1.420(9) . ?
 C20 H20 0.9500 . ?
 C33 H33A 0.9900 . ?
 C33 H33B 0.9900 . ?
 C32 H32A 0.9800 . ?
 C32 H32B 0.9800 . ?
 C32 H32C 0.9800 . ?

loop_
  _geom_angle_atom_site_label_1
  _geom_angle_atom_site_label_2
  _geom_angle_atom_site_label_3
  _geom_angle
  _geom_angle_site_symmetry_1
  _geom_angle_site_symmetry_3
  _geom_angle_publ_flag
 N2 Ir1 N1 177.65(19) . . ?
 N2 Ir1 N3 101.11(17) . . ?
 N2 Ir1 N4 79.73(18) . . ?
 N2 Ir1 C27 80.2(2) . . ?
 N2 Ir1 C11 99.3(2) . . ?
 N1 Ir1 N3 79.47(18) . . ?
 N1 Ir1 N4 102.62(17) . . ?
 N1 Ir1 C27 97.4(2) . . ?
 N1 Ir1 C11 80.3(2) . . ?
 N4 Ir1 N3 79.63(18) . . ?
 C27 Ir1 N3 100.71(19) . . ?
 C27 Ir1 N4 159.61(19) . . ?
 C11 Ir1 N3 159.21(19) . . ?
 C11 Ir1 N4 100.25(19) . . ?
 C11 Ir1 C27 86.6(2) . . ?
 F4 P1 F2 89.8(2) . . ?
 F4 P1 F6 90.0(2) . . ?
 F4 P1 F1 178.9(3) . . ?
 F4 P1 F3 89.6(2) . . ?
 F4 P1 F5 90.6(2) . . ?
 F2 P1 F6 89.8(2) . . ?
 F2 P1 F3 90.1(3) . . ?
 F1 P1 F2 89.2(2) . . ?
 F1 P1 F6 89.9(2) . . ?
 F1 P1 F3 90.5(3) . . ?
 F3 P1 F6 179.6(3) . . ?
 F5 P1 F2 179.6(3) . . ?
 F5 P1 F6 90.4(3) . . ?
 F5 P1 F1 90.5(2) . . ?
 F5 P1 F3 89.7(3) . . ?
 C13 O2 C16 117.3(5) . . ?
 C29 O1 C32 116.7(5) . . ?
 C17 N2 Ir1 118.7(4) . . ?
 C25 N2 Ir1 118.8(4) . . ?
 C25 N2 C17 122.4(5) . . ?
 C1 N1 Ir1 118.9(3) . . ?
 C9 N1 Ir1 118.6(4) . . ?
 C9 N1 C1 122.4(5) . . ?
 Ir1 N3 H3 110.0 . . ?
 C2 N3 Ir1 106.6(3) . . ?
 C2 N3 H3 110.0 . . ?
 C2 N3 C33 112.0(4) . . ?
 C33 N3 Ir1 108.1(3) . . ?
 C33 N3 H3 110.0 . . ?
 Ir1 N4 H4 110.0 . . ?
 C18 N4 Ir1 107.2(3) . . ?
 C18 N4 H4 110.0 . . ?
 C18 N4 C34 112.3(4) . . ?
 C34 N4 Ir1 107.2(3) . . ?
 C34 N4 H4 110.0 . . ?
 C28 C27 Ir1 130.7(4) . . ?
 C28 C27 C26 116.8(5) . . ?
 C26 C27 Ir1 112.3(4) . . ?
 C10 C11 Ir1 112.7(4) . . ?
 C12 C11 Ir1 130.2(4) . . ?
 C12 C11 C10 117.0(5) . . ?
 C11 C10 C9 115.6(5) . . ?
 C15 C10 C11 121.5(5) . . ?
 C15 C10 C9 122.9(5) . . ?
 N1 C1 C2 116.8(5) . . ?
 N1 C1 C6 120.8(5) . . ?
 C6 C1 C2 122.4(5) . . ?
 N2 C17 C18 117.4(5) . . ?
 N2 C17 C22 120.7(5) . . ?
 C22 C17 C18 121.9(5) . . ?
 C27 C28 H28 119.7 . . ?
 C27 C28 C29 120.6(5) . . ?
 C29 C28 H28 119.7 . . ?
 C17 C18 N4 116.9(5) . . ?
 C19 C18 N4 124.3(5) . . ?
 C19 C18 C17 118.7(5) . . ?
 N2 C25 C24 118.6(5) . . ?
 N2 C25 C26 113.1(5) . . ?
 C24 C25 C26 128.3(5) . . ?
 O1 C29 C28 115.5(5) . . ?
 O1 C29 C30 122.6(5) . . ?
 C30 C29 C28 121.9(5) . . ?
 C10 C15 H15 119.8 . . ?
 C14 C15 C10 120.4(5) . . ?
 C14 C15 H15 119.8 . . ?
 C17 C22 C23 116.7(5) . . ?
 C21 C22 C17 117.4(6) . . ?
 C21 C22 C23 126.0(6) . . ?
 C25 C24 H24 119.5 . . ?
 C23 C24 C25 120.9(5) . . ?
 C23 C24 H24 119.5 . . ?
 C8 C7 H7 119.6 . . ?
 C8 C7 C6 120.9(5) . . ?
 C6 C7 H7 119.6 . . ?
 C7 C8 H8 119.9 . . ?
 C7 C8 C9 120.1(5) . . ?
 C9 C8 H8 119.9 . . ?
 N1 C9 C10 112.6(5) . . ?
 N1 C9 C8 118.5(5) . . ?
 C8 C9 C10 128.9(5) . . ?
 C1 C2 N3 118.1(5) . . ?
 C3 C2 N3 123.3(5) . . ?
 C3 C2 C1 118.6(5) . . ?
 O2 C13 C12 114.7(5) . . ?
 O2 C13 C14 123.7(5) . . ?
 C14 C13 C12 121.6(5) . . ?
 C11 C12 C13 120.6(5) . . ?
 C11 C12 H12 119.7 . . ?
 C13 C12 H12 119.7 . . ?
 C1 C6 C7 117.3(5) . . ?
 C1 C6 C5 117.1(6) . . ?
 C7 C6 C5 125.6(5) . . ?
 C2 C3 H3A 120.0 . . ?
 C2 C3 C4 119.9(6) . . ?
 C4 C3 H3A 120.0 . . ?
 O2 C16 H16A 109.5 . . ?
 O2 C16 H16B 109.5 . . ?
 O2 C16 H16C 109.5 . . ?
 H16A C16 H16B 109.5 . . ?
 H16A C16 H16C 109.5 . . ?
 H16B C16 H16C 109.5 . . ?
 C15 C14 C13 118.9(5) . . ?
 C15 C14 H14 120.5 . . ?
 C13 C14 H14 120.5 . . ?
 C27 C26 C25 115.5(5) . . ?
 C31 C26 C27 121.0(5) . . ?
 C31 C26 C25 123.4(5) . . ?
 C26 C31 H31 119.4 . . ?
 C30 C31 C26 121.2(5) . . ?
 C30 C31 H31 119.4 . . ?
 C22 C21 H21 119.8 . . ?
 C20 C21 C22 120.5(6) . . ?
 C20 C21 H21 119.8 . . ?
 C22 C23 H23 119.7 . . ?
 C24 C23 C22 120.6(5) . . ?
 C24 C23 H23 119.7 . . ?
 C3 C4 H4A 119.6 . . ?
 C5 C4 C3 120.9(6) . . ?
 C5 C4 H4A 119.6 . . ?
 C6 C5 H5 119.5 . . ?
 C4 C5 C6 121.1(5) . . ?
 C4 C5 H5 119.5 . . ?
 C29 C30 H30 120.8 . . ?
 C31 C30 C29 118.4(5) . . ?
 C31 C30 H30 120.8 . . ?
 N4 C34 H34A 109.8 . . ?
 N4 C34 H34B 109.8 . . ?
 N4 C34 C33 109.2(4) . . ?
 H34A C34 H34B 108.3 . . ?
 C33 C34 H34A 109.8 . . ?
 C33 C34 H34B 109.8 . . ?
 C18 C19 H19 119.9 . . ?
 C18 C19 C20 120.2(6) . . ?
 C20 C19 H19 119.9 . . ?
 C21 C20 C19 121.3(6) . . ?
 C21 C20 H20 119.3 . . ?
 C19 C20 H20 119.3 . . ?
 N3 C33 C34 109.0(4) . . ?
 N3 C33 H33A 109.9 . . ?
 N3 C33 H33B 109.9 . . ?
 C34 C33 H33A 109.9 . . ?
 C34 C33 H33B 109.9 . . ?
 H33A C33 H33B 108.3 . . ?
 O1 C32 H32A 109.5 . . ?
 O1 C32 H32B 109.5 . . ?
 O1 C32 H32C 109.5 . . ?
 H32A C32 H32B 109.5 . . ?
 H32A C32 H32C 109.5 . . ?
 H32B C32 H32C 109.5 . . ?

loop_
  _geom_torsion_atom_site_label_1
  _geom_torsion_atom_site_label_2
  _geom_torsion_atom_site_label_3
  _geom_torsion_atom_site_label_4
  _geom_torsion
  _geom_torsion_site_symmetry_1
  _geom_torsion_site_symmetry_2
  _geom_torsion_site_symmetry_3
  _geom_torsion_site_symmetry_4
  _geom_torsion_publ_flag
 Ir1 N2 C17 C18 -1.5(6) . . . . ?
 Ir1 N2 C17 C22 -179.7(4) . . . . ?
 Ir1 N2 C25 C24 -178.0(4) . . . . ?
 Ir1 N2 C25 C26 1.2(6) . . . . ?
 Ir1 N1 C1 C2 -3.5(6) . . . . ?
 Ir1 N1 C1 C6 177.4(4) . . . . ?
 Ir1 N1 C9 C10 3.7(6) . . . . ?
 Ir1 N1 C9 C8 -177.1(4) . . . . ?
 Ir1 N3 C2 C1 2.3(6) . . . . ?
 Ir1 N3 C2 C3 -177.4(5) . . . . ?
 Ir1 N3 C33 C34 -40.6(5) . . . . ?
 Ir1 N4 C18 C17 -1.3(5) . . . . ?
 Ir1 N4 C18 C19 178.5(5) . . . . ?
 Ir1 N4 C34 C33 -45.4(5) . . . . ?
 Ir1 C27 C28 C29 -178.5(4) . . . . ?
 Ir1 C27 C26 C25 -2.4(6) . . . . ?
 Ir1 C27 C26 C31 179.2(5) . . . . ?
 Ir1 C11 C10 C15 176.2(4) . . . . ?
 Ir1 C11 C10 C9 -2.3(6) . . . . ?
 Ir1 C11 C12 C13 -176.2(4) . . . . ?
 O2 C13 C12 C11 -179.5(5) . . . . ?
 O2 C13 C14 C15 178.7(5) . . . . ?
 O1 C29 C30 C31 -178.3(6) . . . . ?
 N2 C17 C18 N4 1.9(7) . . . . ?
 N2 C17 C18 C19 -177.9(5) . . . . ?
 N2 C17 C22 C21 178.1(5) . . . . ?
 N2 C17 C22 C23 -1.6(8) . . . . ?
 N2 C25 C24 C23 -3.0(9) . . . . ?
 N2 C25 C26 C27 0.8(7) . . . . ?
 N2 C25 C26 C31 179.2(6) . . . . ?
 N1 C1 C2 N3 0.4(7) . . . . ?
 N1 C1 C2 C3 -179.8(5) . . . . ?
 N1 C1 C6 C7 -1.2(8) . . . . ?
 N1 C1 C6 C5 179.2(5) . . . . ?
 N3 C2 C3 C4 -178.8(5) . . . . ?
 N4 C18 C19 C20 179.6(5) . . . . ?
 N4 C34 C33 N3 59.1(6) . . . . ?
 C27 C28 C29 O1 -179.7(5) . . . . ?
 C27 C28 C29 C30 1.3(9) . . . . ?
 C27 C26 C31 C30 -1.1(9) . . . . ?
 C11 C10 C15 C14 0.0(8) . . . . ?
 C11 C10 C9 N1 -0.8(7) . . . . ?
 C11 C10 C9 C8 -179.9(5) . . . . ?
 C10 C11 C12 C13 0.3(7) . . . . ?
 C10 C15 C14 C13 1.4(8) . . . . ?
 C1 N1 C9 C10 -179.2(5) . . . . ?
 C1 N1 C9 C8 0.0(8) . . . . ?
 C1 C2 C3 C4 1.5(9) . . . . ?
 C1 C6 C5 C4 -0.4(9) . . . . ?
 C17 N2 C25 C24 3.2(8) . . . . ?
 C17 N2 C25 C26 -177.6(5) . . . . ?
 C17 C18 C19 C20 -0.6(9) . . . . ?
 C17 C22 C21 C20 0.1(8) . . . . ?
 C17 C22 C23 C24 1.7(9) . . . . ?
 C28 C27 C26 C25 -178.6(5) . . . . ?
 C28 C27 C26 C31 2.9(8) . . . . ?
 C28 C29 C30 C31 0.7(9) . . . . ?
 C18 N4 C34 C33 72.1(6) . . . . ?
 C18 C17 C22 C21 0.0(8) . . . . ?
 C18 C17 C22 C23 -179.7(5) . . . . ?
 C18 C19 C20 C21 0.8(10) . . . . ?
 C25 N2 C17 C18 177.3(5) . . . . ?
 C25 N2 C17 C22 -0.9(8) . . . . ?
 C25 C24 C23 C22 0.5(10) . . . . ?
 C25 C26 C31 C30 -179.4(6) . . . . ?
 C15 C10 C9 N1 -179.2(5) . . . . ?
 C15 C10 C9 C8 1.6(9) . . . . ?
 C22 C17 C18 N4 -180.0(5) . . . . ?
 C22 C17 C18 C19 0.3(8) . . . . ?
 C22 C21 C20 C19 -0.5(9) . . . . ?
 C24 C25 C26 C27 179.9(6) . . . . ?
 C24 C25 C26 C31 -1.7(10) . . . . ?
 C7 C8 C9 N1 0.6(8) . . . . ?
 C7 C8 C9 C10 179.7(5) . . . . ?
 C7 C6 C5 C4 -179.9(6) . . . . ?
 C8 C7 C6 C1 1.8(8) . . . . ?
 C8 C7 C6 C5 -178.7(6) . . . . ?
 C9 N1 C1 C2 179.4(5) . . . . ?
 C9 N1 C1 C6 0.3(8) . . . . ?
 C9 C10 C15 C14 178.4(5) . . . . ?
 C2 N3 C33 C34 76.5(5) . . . . ?
 C2 C1 C6 C7 179.8(5) . . . . ?
 C2 C1 C6 C5 0.2(8) . . . . ?
 C2 C3 C4 C5 -1.7(10) . . . . ?
 C12 C11 C10 C15 -0.9(7) . . . . ?
 C12 C11 C10 C9 -179.4(5) . . . . ?
 C12 C13 C14 C15 -2.0(8) . . . . ?
 C6 C1 C2 N3 179.5(5) . . . . ?
 C6 C1 C2 C3 -0.8(8) . . . . ?
 C6 C7 C8 C9 -1.5(9) . . . . ?
 C3 C4 C5 C6 1.1(9) . . . . ?
 C16 O2 C13 C12 -166.7(5) . . . . ?
 C16 O2 C13 C14 12.6(8) . . . . ?
 C14 C13 C12 C11 1.2(8) . . . . ?
 C26 C27 C28 C29 -3.0(8) . . . . ?
 C26 C25 C24 C23 177.9(6) . . . . ?
 C26 C31 C30 C29 -0.8(10) . . . . ?
 C21 C22 C23 C24 -177.9(6) . . . . ?
 C23 C22 C21 C20 179.8(6) . . . . ?
 C34 N4 C18 C17 -118.7(5) . . . . ?
 C34 N4 C18 C19 61.0(7) . . . . ?
 C33 N3 C2 C1 -115.7(5) . . . . ?
 C33 N3 C2 C3 64.6(7) . . . . ?
 C32 O1 C29 C28 -176.0(5) . . . . ?
 C32 O1 C29 C30 3.0(8) . . . . ?

_smtbx_masks_special_details       ?
loop_
  _smtbx_masks_void_nr
  _smtbx_masks_void_average_x
  _smtbx_masks_void_average_y
  _smtbx_masks_void_average_z
  _smtbx_masks_void_volume
  _smtbx_masks_void_count_electrons
  _smtbx_masks_void_content
 1 0.000 0.500 0.500 257.2 112.6 '2 CHCl3'
 2 0.500 0.000 0.000 257.2 112.6 '2 CHCl3'

_smtbx_masks_void_probe_radius     1.2
_smtbx_masks_void_truncation_radius  1.2
_shelx_res_file
;
TITL exp_3482_a.res in P2(1)/n
    exp_3482.res
    created by SHELXL-2018/3 at 16:11:34 on 16-Jul-2023
REM Old TITL exp_3482_a.res in P2(1)/n
REM SHELXT solution in P2(1)/n: R1 0.067, Rweak 0.010, Alpha 0.030
REM <I/s> 0.240 for 227 systematic absences, Orientation as input
REM Formula found by SHELXT: C35 N2 O4 Ir Cl3 P F6
CELL 1.54184 10.5816 18.5399 17.3118 90 90.374 90
ZERR 4 0.0001 0.0002 0.0002 0 0.001 0
LATT 1
SYMM 0.5-X,0.5+Y,0.5-Z
SFAC C H F Ir N O P
UNIT 136 112 24 4 16 8 4

L.S. 105
PLAN  1
TEMP -123.17(10)
CONF
BOND
list 4
MORE -1
BOND $H
ABIN
fmap 2
acta
OMIT -7 6 17
OMIT -7 7 17
OMIT -3 11 18
REM <olex2.extras>
REM <HklSrc "%.\\exp_3482.hkl">
REM </olex2.extras>

WGHT    0.044900    8.410900
FVAR       0.20268
IR1   4    0.488838    0.421717    0.777877    11.00000    0.01467    0.01798 =
         0.01515   -0.00067   -0.00069    0.00094
P1    7   -0.228843    0.258320    0.543609    11.00000    0.02978    0.02383 =
         0.02016    0.00106    0.00061   -0.00242
F4    3   -0.231977    0.321701    0.482550    11.00000    0.04252    0.03754 =
         0.03183    0.01399    0.00484    0.00165
F2    3   -0.156878    0.309939    0.603429    11.00000    0.04838    0.04023 =
         0.03866   -0.00911   -0.00999   -0.01051
F6    3   -0.361689    0.284833    0.577199    11.00000    0.03243    0.06439 =
         0.04034    0.00578    0.00620    0.00293
F1    3   -0.224512    0.195274    0.606478    11.00000    0.07563    0.03396 =
         0.03204    0.00984   -0.00010   -0.00170
O2    6    0.093881    0.584861    0.875706    11.00000    0.01985    0.03564 =
         0.03653   -0.00587    0.00259    0.00886
O1    6    0.654719    0.663965    0.630254    11.00000    0.02707    0.02662 =
         0.03507    0.00935   -0.00407   -0.00689
N2    5    0.350388    0.390115    0.706383    11.00000    0.02005    0.02126 =
         0.02452   -0.00222   -0.00107    0.00376
N1    5    0.628291    0.456917    0.846701    11.00000    0.02012    0.02282 =
         0.01165    0.00231   -0.00096    0.00005
F3    3   -0.095919    0.232407    0.509706    11.00000    0.04811    0.05974 =
         0.04563    0.00597    0.01434    0.02214
F5    3   -0.299838    0.206504    0.484328    11.00000    0.08027    0.05336 =
         0.03557   -0.00688   -0.00830   -0.02668
N3    5    0.645746    0.347911    0.742413    11.00000    0.01654    0.02343 =
         0.02481   -0.00338   -0.00249    0.00324
AFIX  13
H3    2    0.661283    0.352599    0.685718    11.00000   -1.20000
AFIX   0
N4    5    0.428782    0.319646    0.836043    11.00000    0.02346    0.02214 =
         0.01613    0.00293    0.00141    0.00023
AFIX  13
H4    2    0.398340    0.330326    0.889397    11.00000   -1.20000
AFIX   0
C27   1    0.502474    0.499307    0.696024    11.00000    0.01540    0.02216 =
         0.01781    0.00038    0.00282    0.00183
C11   1    0.392797    0.494640    0.840902    11.00000    0.01924    0.02050 =
         0.01818    0.00729    0.00229    0.00245
C10   1    0.471841    0.532744    0.894238    11.00000    0.02485    0.01468 =
         0.01580    0.00467    0.00398   -0.00377
C1    1    0.745722    0.427431    0.839512    11.00000    0.01661    0.02559 =
         0.01317    0.00281    0.00068   -0.00084
C17   1    0.286247    0.327734    0.722768    11.00000    0.01690    0.01596 =
         0.01980   -0.00368    0.00319    0.00050
C28   1    0.581281    0.559056    0.691348    11.00000    0.01629    0.02487 =
         0.02308    0.00439    0.00388   -0.00121
AFIX  43
H28   2    0.642396    0.567505    0.730759    11.00000   -1.20000
AFIX   0
C18   1    0.324982    0.288421    0.789090    11.00000    0.01673    0.02518 =
         0.02522   -0.00567    0.00533   -0.00068
C25   1    0.325257    0.429787    0.643821    11.00000    0.02063    0.02758 =
         0.01979   -0.00143   -0.00636    0.00369
C29   1    0.571418    0.606895    0.629093    11.00000    0.01918    0.02362 =
         0.02418    0.00344    0.00502    0.00148
C15   1    0.424799    0.588346    0.939887    11.00000    0.02812    0.02479 =
         0.02061   -0.00246   -0.00310   -0.00242
AFIX  43
H15   2    0.479417    0.612834    0.974877    11.00000   -1.20000
AFIX   0
C22   1    0.188138    0.303132    0.673751    11.00000    0.02113    0.02938 =
         0.02529   -0.01009    0.00399    0.00056
C24   1    0.224261    0.408400    0.594605    11.00000    0.02478    0.03703 =
         0.02366    0.00268   -0.00981   -0.00504
AFIX  43
H24   2    0.202673    0.437378    0.551227    11.00000   -1.20000
AFIX   0
C7    1    0.823010    0.509687    0.935401    11.00000    0.02001    0.03202 =
         0.02626    0.00272   -0.00631   -0.00782
AFIX  43
H7    2    0.890220    0.528932    0.965652    11.00000   -1.20000
AFIX   0
C8    1    0.704780    0.537912    0.942137    11.00000    0.02700    0.02473 =
         0.02238   -0.00392   -0.00340   -0.00481
AFIX  43
H8    2    0.689613    0.575823    0.977813    11.00000   -1.20000
AFIX   0
C9    1    0.604025    0.510743    0.895876    11.00000    0.02460    0.01937 =
         0.02280    0.00400   -0.00416   -0.00302
C2    1    0.758411    0.370519    0.786127    11.00000    0.01850    0.02993 =
         0.02079    0.00322   -0.00091    0.00453
C13   1    0.220673    0.570612    0.884417    11.00000    0.01805    0.02432 =
         0.02388    0.00630    0.00367    0.00140
C12   1    0.266364    0.514904    0.837416    11.00000    0.01936    0.02373 =
         0.01533    0.00064    0.00511   -0.00046
AFIX  43
H12   2    0.210429    0.490804    0.802894    11.00000   -1.20000
AFIX   0
C6    1    0.846952    0.452400    0.884233    11.00000    0.02099    0.02885 =
         0.02410    0.00673   -0.00317   -0.00427
C3    1    0.875197    0.339156    0.777267    11.00000    0.02051    0.03442 =
         0.02486    0.00117    0.00282    0.00513
AFIX  43
H3A   2    0.886323    0.301484    0.740740    11.00000   -1.20000
AFIX   0
C16   1    0.046937    0.650606    0.908831    11.00000    0.03265    0.03060 =
         0.03246   -0.00931    0.00742    0.01385
AFIX 137
H16A  2    0.101725    0.690811    0.893908    11.00000   -1.50000
H16B  2    0.046216    0.646286    0.965246    11.00000   -1.50000
H16C  2   -0.039143    0.659556    0.889929    11.00000   -1.50000
AFIX   0
C14   1    0.299376    0.608041    0.934568    11.00000    0.02920    0.02136 =
         0.02189    0.00019    0.00415    0.00312
AFIX  43
H14   2    0.267459    0.646644    0.964799    11.00000   -1.20000
AFIX   0
C26   1    0.407778    0.491667    0.636393    11.00000    0.01830    0.02906 =
         0.02123   -0.00086   -0.00192    0.00100
C31   1    0.400506    0.539923    0.575809    11.00000    0.02894    0.03150 =
         0.02420    0.00195   -0.00866   -0.00077
AFIX  43
H31   2    0.338130    0.533209    0.536752    11.00000   -1.20000
AFIX   0
C21   1    0.129265    0.237347    0.693172    11.00000    0.02313    0.03678 =
         0.03713   -0.01801    0.00635   -0.00028
AFIX  43
H21   2    0.063000    0.219047    0.661495    11.00000   -1.20000
AFIX   0
C23   1    0.158156    0.347222    0.608599    11.00000    0.02225    0.03759 =
         0.02881   -0.01095   -0.00716   -0.00113
AFIX  43
H23   2    0.091296    0.333575    0.574751    11.00000   -1.20000
AFIX   0
C4    1    0.979100    0.363121    0.822748    11.00000    0.01755    0.04516 =
         0.02837    0.00209    0.00128    0.00893
AFIX  43
H4A   2    1.059021    0.340392    0.817364    11.00000   -1.20000
AFIX   0
C5    1    0.965777    0.417957    0.873704    11.00000    0.01816    0.03826 =
         0.02533    0.00963   -0.00197   -0.00686
AFIX  43
H5    2    1.036923    0.433695    0.902906    11.00000   -1.20000
AFIX   0
C30   1    0.482112    0.597685    0.570946    11.00000    0.03186    0.03074 =
         0.02297    0.00838   -0.00363    0.00200
AFIX  43
H30   2    0.477284    0.630387    0.528783    11.00000   -1.20000
AFIX   0
C34   1    0.541618    0.271480    0.839655    11.00000    0.02492    0.02257 =
         0.03010    0.00627   -0.00283    0.00477
AFIX  23
H34A  2    0.515171    0.221766    0.852754    11.00000   -1.20000
H34B  2    0.600692    0.288583    0.880278    11.00000   -1.20000
AFIX   0
C19   1    0.266068    0.225310    0.805336    11.00000    0.03197    0.02728 =
         0.02489    0.00061    0.00528   -0.00267
AFIX  43
H19   2    0.291345    0.198000    0.849223    11.00000   -1.20000
AFIX   0
C20   1    0.166757    0.199920    0.756984    11.00000    0.03526    0.02622 =
         0.02979    0.00056    0.00807   -0.00641
AFIX  43
H20   2    0.125620    0.155916    0.769406    11.00000   -1.20000
AFIX   0
C33   1    0.607297    0.271941    0.761419    11.00000    0.02140    0.02269 =
         0.03472   -0.00984   -0.00304    0.00846
AFIX  23
H33A  2    0.682803    0.240442    0.763255    11.00000   -1.20000
H33B  2    0.549204    0.253303    0.721048    11.00000   -1.20000
AFIX   0
C32   1    0.641125    0.716297    0.569940    11.00000    0.04103    0.02965 =
         0.03914    0.00526   -0.00928   -0.00116
AFIX 137
H32A  2    0.658281    0.693545    0.520000    11.00000   -1.50000
H32B  2    0.701058    0.755822    0.578596    11.00000   -1.50000
H32C  2    0.554731    0.735341    0.569945    11.00000   -1.50000
AFIX   0
HKLF 4


REM  exp_3482_a.res in P2(1)/n
REM wR2 = 0.1009, GooF = S = 1.062, Restrained GooF = 1.062 for all data
REM R1 = 0.0392 for 5530 Fo > 4sig(Fo) and 0.0533 for all 6708 data
REM 435 parameters refined using 0 restraints

END

WGHT      0.0448      8.4413

REM Highest difference peak  1.134,  deepest hole -0.994,  1-sigma level  0.157
Q1    1   0.4600  0.4204  0.7201  11.00000  0.05    1.13
;
_shelx_res_checksum                56504
_shelx_hkl_file
;
   0   0  -1    1.69    3.23
   0   0  -1    1.09    2.47
   0   0  -1    0.27    2.91
   0   0  -2 3312.12  118.38
   0   0  -2 3508.96  126.81
   0   0  -2 3374.43  117.54
   0   0  -2 3679.00  127.27
   0   0  -3    1.52    4.67
   0   0  -3   -0.29    4.80
   0   0  -3   -0.16    9.61
   0   0  -4   21.51   15.59
   0   0  -4   17.89    6.45
   0   0  -4   25.83    7.98
   0   0  -5   -0.97    6.03
   0   0  -5   -2.27    8.31
   0   0  -6 2406.57   95.84
   0   0  -6 2357.12  108.83
   0   0  -6 2406.73  100.08
   0   0  -6 2583.41  113.79
   0   0  -7   -1.05    7.88
   0   0  -7    5.34    6.10
   0   0  -7    3.47   12.88
   0   0  -7   -4.17   14.21
   0   0  -8  249.90   33.24
   0   0  -8  221.06   24.40
   0   0  -8  307.98   37.69
   0   0  -9    2.87   14.06
   0   0  -9   -8.26   16.88
   0   0 -10  112.36   26.15
   0   0 -10  109.92   28.33
   0   0 -11    0.30   16.19
   0   0 -11    3.60   16.55
   0   0 -12  400.58   29.59
   0   0 -12  489.45   31.38
   0   0 -12  498.61   31.89
   0   0 -12  402.55   53.20
   0   0 -12  418.27   28.14
   0   0 -12  447.98   30.86
   0   0 -12  509.36   61.14
   0   0 -12  401.51   28.13
   0   0 -13    2.97    6.57
   0   0 -13   -5.15    7.14
   0   0 -13   11.06    8.58
   0   0 -13  -12.20   10.22
   0   0 -13    1.77   17.48
   0   0 -14  739.96   44.22
   0   0 -14  737.58   44.22
   0   0 -14  667.71   40.23
   0   0 -14  669.63   43.02
   0   0 -14  832.90   85.84
   0   0 -15    0.96    9.33
   0   0 -15   -4.24   10.20
   0   0 -15   -5.47    9.99
   0   0 -15    1.38   10.37
   0   0 -16  486.33   36.08
   0   0 -16  502.19   37.43
   0   0 -16  510.99   37.20
   0   0 -16  545.63   38.04
   0   0 -17    6.58    8.48
   0   0 -17    6.22    9.49
   0   0 -17   -0.03   10.40
   0   0 -17   -5.37   12.29
   0   0 -17   -4.27   12.88
   0   0 -18 1299.77   63.03
   0   0 -18 1250.83   63.05
   0   0 -18 1382.07   63.99
   0   0 -18 1255.61   60.94
   0   0 -18 1200.63   63.11
   0   0 -18 1340.89   63.92
   0   0 -19    3.83    7.74
   0   0 -19    5.15    9.30
   0   0 -19   -8.30    8.45
   0   0 -19    1.65    8.58
   0   0 -19    2.29    7.28
   0   0 -19   -4.87    9.95
   0   0 -20  467.61   27.86
   0   0 -20  438.04   26.90
   0   0 -20  474.15   28.53
   0   0 -21    1.15    4.68
   0   0 -21   -6.11    6.57
   0  -1  -1   32.66    6.17
   0  -1  -1   38.94    6.18
   0   1  -1   31.97    4.70
   0   1  -1   30.97    4.17
   0  -1  -2    6.95    5.55
   0  -1  -2    9.29    7.96
   0   1  -2   10.43    3.05
   0   1  -2    9.47    5.57
   0   1  -2   10.49    6.89
   0  -1  -3  516.17   35.53
   0  -1  -3  535.74   29.58
   0  -1  -3  499.87   34.57
   0   1  -3  489.53   30.22
   0   1  -3  534.29   34.40
   0  -1  -4 2479.96   93.22
   0  -1  -4 1992.31  101.82
   0   1  -4 2461.88   85.23
   0   1  -4 2316.54   89.55
   0  -1  -4 2490.59   94.66
   0  -1  -4 1879.18   99.66
   0   1  -4 2510.49  105.84
   0   1  -4 2336.70   97.86
   0   1  -5 1092.09   45.05
   0  -1  -5 1093.00   66.75
   0   1  -5 1019.18   49.67
   0  -1  -5 1069.65   52.74
   0  -1  -5  968.73   63.88
   0  -1  -5 1026.99   58.45
   0   1  -5 1068.45   58.43
   0   1  -5 1067.76   65.26
   0  -1  -6  862.63   62.83
   0   1  -6  814.40   37.99
   0   1  -6  807.58   44.65
   0  -1  -6  803.59   52.81
   0  -1  -6  875.19   46.96
   0   1  -6  801.23   52.14
   0  -1  -6  848.98   55.23
   0   1  -6  879.90   55.01
   0  -1  -7  381.24   29.23
   0   1  -7  391.85   37.57
   0  -1  -7  372.98   44.80
   0  -1  -7  369.39   36.57
   0   1  -7  282.72   26.08
   0   1  -7  375.06   21.84
   0   1  -7  378.36   38.08
   0  -1  -7  388.29   39.12
   0  -1  -8   98.96   14.52
   0   1  -8   71.71   20.66
   0   1  -8   90.23   16.45
   0  -1  -8   78.00   21.84
   0  -1  -8   74.41   23.23
   0   1  -8   94.53   23.19
   0   1  -9  375.63   34.76
   0  -1  -9  520.26   49.52
   0   1  -9  499.25   48.60
   0  -1  -9  521.52   52.20
   0   1  -9  570.57   53.17
   0   1 -10  402.59   36.85
   0  -1 -10  403.77   47.17
   0   1 -10  449.13   49.89
   0  -1 -10  450.25   51.87
   0   1 -10  516.62   54.89
   0   1 -11  565.19   60.04
   0  -1 -11  730.03   69.93
   0   1 -11  764.33   70.79
   0   1 -12  672.85   38.74
   0  -1 -12  669.48   38.85
   0  -1 -12  618.36   35.61
   0   1 -12  626.47   36.34
   0   1 -12  655.43   67.39
   0   1 -12  682.53   39.28
   0  -1 -12  721.04   39.63
   0   1 -12  623.14   38.36
   0  -1 -12  569.67   36.92
   0  -1 -12  775.18   74.78
   0  -1 -12  604.76   35.85
   0   1 -12  610.87   36.52
   0   1 -12  750.89   74.13
   0  -1 -13  368.18   28.54
   0   1 -13  375.92   28.52
   0   1 -13  336.38   25.76
   0   1 -13  380.31   29.01
   0  -1 -13  383.16   28.82
   0   1 -13  338.44   50.41
   0  -1 -13  321.89   27.14
   0   1 -13  356.98   28.64
   0   1 -13  423.78   58.94
   0  -1 -13  377.71   54.19
   0  -1 -14  246.60   23.97
   0   1 -14  271.00   25.18
   0   1 -14  263.08   23.28
   0   1 -14  263.37   25.22
   0  -1 -14  275.92   25.17
   0  -1 -14  241.75   24.38
   0  -1 -14  276.79   25.37
   0  -1 -14  149.68   22.51
   0   1 -14  244.23   24.75
   0   1 -14  326.17   55.75
   0  -1 -14  342.94   53.27
   0  -1 -15  368.56   30.48
   0   1 -15  401.00   31.56
   0   1 -15  352.27   30.62
   0  -1 -15  376.69   31.18
   0  -1 -15  341.34   29.79
   0   1 -15  390.99   29.07
   0   1 -15  395.48   31.48
   0  -1 -15  389.67   30.46
   0  -1 -16   31.37   12.38
   0   1 -16   15.55   10.07
   0  -1 -16   23.93   11.63
   0   1 -16   19.44   12.05
   0   1 -16    6.79    8.47
   0  -1 -16   36.43   12.91
   0   1 -16   21.78   11.61
   0  -1 -16   24.26   12.29
   0  -1 -17   13.00   10.29
   0   1 -17    8.25    9.38
   0  -1 -17    5.83   11.56
   0   1 -17    5.19   11.82
   0   1 -17   14.18   10.18
   0   1 -17   21.01   13.61
   0  -1 -17    5.95   10.75
   0  -1 -17   11.13   10.73
   0  -1 -17   10.12    9.48
   0  -1 -17   21.51   11.73
   0   1 -17   11.79   11.08
   0   1 -18   73.14   13.50
   0  -1 -18   89.28   15.27
   0  -1 -18   77.51   15.05
   0   1 -18   84.02   16.79
   0  -1 -18   69.15   13.20
   0   1 -18   82.38   16.27
   0  -1 -18   86.49   16.07
   0  -1 -18   86.99   14.83
   0   1 -18   87.72   14.95
   0   1 -18   80.18   14.81
   0   1 -18   94.22   16.32
   0  -1 -18  114.99   17.29
   0   1 -19  256.65   21.03
   0  -1 -19  223.92   20.71
   0   1 -19  256.70   21.89
   0  -1 -19  237.41   21.73
   0   1 -19  273.41   23.26
   0  -1 -19  240.49   22.12
   0   1 -19  212.60   20.37
   0  -1 -19  230.19   21.28
   0  -1 -19  225.90   21.35
   0   1 -19  238.28   21.04
   0  -1 -19  224.05   19.90
   0  -1 -20   41.84    9.95
   0   1 -20   43.58    9.20
   0  -1 -20   49.66   10.44
   0  -1 -20   38.48    8.60
   0   1 -20   35.08    8.82
   0   1 -20   49.90   10.48
   0  -1 -21  152.61   13.11
   0   1 -21  148.24   13.05
   0   1 -21  151.98   12.72
   0  -2   0 1435.62   59.95
   0  -2   1 3518.19  126.94
   0  -2  -1 3454.49  131.87
   0   2  -1 3298.92  119.62
   0   2  -1 3771.61  128.12
   0  -2  -2 1421.14   63.58
   0  -2  -2 1293.35   63.43
   0   2  -2 1467.43   56.87
   0   2  -2 1408.03   58.76
   0  -2  -3 5532.99  197.07
   0   2  -3 5555.69  183.19
   0  -2  -3 5402.05  201.94
   0   2  -3 5251.91  191.63
   0   2  -3 5694.91  200.91
   0   2  -3 5298.48  177.83
   0  -2  -4  823.40   44.80
   0  -2  -4  603.08   45.77
   0  -2  -4  648.14   48.14
   0   2  -4  720.67   41.76
   0   2  -4  790.27   49.99
   0  -2  -5    7.52   15.89
   0   2  -5   16.75    4.87
   0  -2  -5   11.01   11.05
   0  -2  -5   16.55   17.43
   0  -2  -5    9.93   12.03
   0   2  -5   24.62   11.74
   0   2  -5   29.58   18.88
   0   2  -6  529.03   33.94
   0  -2  -6  528.42   48.86
   0   2  -6  519.30   25.23
   0  -2  -6  500.55   37.22
   0  -2  -6  463.34   47.25
   0  -2  -6  524.69   42.43
   0   2  -6  470.71   47.36
   0   2  -6  512.63   40.35
   0  -2  -7  135.08   30.12
   0   2  -7   80.91   14.73
   0  -2  -7  117.85   18.76
   0   2  -7  113.30   28.49
   0  -2  -7  140.49   25.64
   0   2  -7  129.45   22.93
   0  -2  -8   38.58   12.43
   0  -2  -8   31.33   22.06
   0   2  -8   31.30   10.92
   0   2  -8   25.94   16.99
   0  -2  -8   43.89   19.06
   0   2  -8   57.98   18.29
   0   2  -9    6.10    8.14
   0   2  -9  -35.64   18.13
   0   2  -9   -1.27   14.11
   0  -2  -9    2.57   14.85
   0   2 -10   -3.74    8.91
   0   2 -10  -15.60   17.58
   0   2 -10   10.80   15.63
   0  -2 -10   -6.10   17.43
   0   2 -11  274.67   41.97
   0  -2 -11  288.86   45.64
   0   2 -11  391.50   49.73
   0  -2 -12  219.53   20.98
   0   2 -12  219.89   20.47
   0  -2 -12  209.53   19.82
   0   2 -12  195.45   37.14
   0   2 -12  217.83   19.46
   0   2 -12  186.81   19.96
   0  -2 -12  169.76   18.74
   0  -2 -12  206.03   20.54
   0   2 -12  223.02   41.21
   0   2 -12  182.02   17.77
   0  -2 -12  212.40   38.56
   0   2 -12  195.63   19.24
   0   2 -13   97.84   14.79
   0  -2 -13   87.67   14.51
   0  -2 -13   79.91   14.02
   0   2 -13   83.33   29.99
   0   2 -13   84.07   13.39
   0   2 -13   87.15   14.21
   0   2 -13   86.23   14.97
   0  -2 -13   64.32   13.30
   0  -2 -13   74.39   13.44
   0  -2 -13   47.89   22.88
   0   2 -13   99.76   32.44
   0   2 -14  383.09   30.21
   0  -2 -14  375.04   30.19
   0  -2 -14  385.82   29.63
   0   2 -14  424.84   31.59
   0   2 -14  392.97   28.83
   0   2 -14  377.77   56.67
   0   2 -14  437.32   32.94
   0  -2 -14  382.65   30.77
   0  -2 -14  407.04   31.01
   0  -2 -14  415.79   59.85
   0   2 -14  372.16   58.37
   0  -2 -15  558.45   38.57
   0   2 -15  599.90   39.41
   0   2 -15  554.81   39.67
   0  -2 -15  560.85   39.11
   0  -2 -15  524.07   37.71
   0   2 -15  521.87   35.41
   0  -2 -15  549.60   37.25
   0   2 -15  663.62   40.56
   0   2 -16   88.77   15.37
   0  -2 -16  116.38   18.24
   0   2 -16  114.49   18.38
   0   2 -16  123.86   20.08
   0   2 -16   80.35   14.91
   0  -2 -16  104.34   17.30
   0  -2 -16  138.61   19.44
   0  -2 -16  175.78   31.40
   0  -2 -16  110.72   16.91
   0   2 -16  113.59   17.83
   0  -2 -16  117.32   17.83
   0   2 -17 1205.53   59.63
   0  -2 -17 1064.58   57.67
   0   2 -17 1108.82   58.41
   0   2 -17 1159.21   58.48
   0  -2 -17 1002.31   56.74
   0  -2 -17 1029.99   57.75
   0  -2 -17 1003.77   54.48
   0   2 -17 1066.71   58.33
   0  -2 -17  843.88   56.32
   0  -2 -17 1121.93   55.63
   0   2 -17 1112.27   57.50
   0  -2 -17 1100.92   56.55
   0  -2 -18  299.79   26.33
   0   2 -18  328.86   26.22
   0  -2 -18  304.12   26.79
   0  -2 -18  295.02   25.23
   0   2 -18  335.57   26.98
   0  -2 -18  318.27   27.17
   0   2 -18  321.30   26.57
   0   2 -18  330.30   28.12
   0  -2 -18  296.34   24.52
   0   2 -18  348.24   28.17
   0  -2 -18  350.85   27.83
   0   2 -18  336.72   26.68
   0   2 -19  163.98   17.02
   0   2 -19  172.84   17.93
   0  -2 -19  174.97   18.52
   0  -2 -19  179.84   18.68
   0   2 -19  174.86   17.63
   0   2 -19  193.49   19.92
   0   2 -19  178.16   18.76
   0  -2 -19  171.27   16.68
   0  -2 -19  171.91   18.60
   0  -2 -20  173.60   16.18
   0   2 -20  162.17   15.73
   0   2 -20  149.58   13.99
   0   2 -20  171.07   16.19
   0  -2 -20  130.81   14.31
   0  -2 -20  152.05   13.49
   0  -2 -20  171.88   16.48
   0  -2 -21  135.01   12.19
   0   2 -21  152.65   12.90
   0  -3   0    1.54    9.85
   0  -3  -1  187.69   21.31
   0  -3   1  193.04   18.28
   0   3  -1  199.04   18.62
   0  -3  -2  911.34   51.02
   0   3  -2  861.88   44.96
   0   3  -2  906.61   37.90
   0  -3  -3   -4.72   11.86
   0  -3  -3   -9.27   13.75
   0   3  -3    1.02    6.38
   0   3  -3    7.77   14.44
   0  -3  -4 1100.87   59.82
   0  -3  -4 1003.08   63.66
   0   3  -4 1041.03   44.10
   0   3  -4 1064.56   63.27
   0   3  -4  987.51   37.78
   0   3  -4 1059.00   53.18
   0  -3  -5  103.75   19.56
   0  -3  -5   98.30   23.53
   0  -3  -5  111.71   25.84
   0   3  -5   96.50   17.18
   0   3  -5  137.20   27.33
   0  -3  -5   99.97   17.98
   0   3  -6 3016.93  107.09
   0  -3  -6 2919.55  142.69
   0  -3  -6 3082.67  130.53
   0  -3  -6 2839.18  142.85
   0  -3  -6 2837.13  130.35
   0   3  -6 2906.69  126.82
   0   3  -6 2912.96  142.58
   0  -3  -7    4.82   19.53
   0   3  -7    9.62    8.85
   0  -3  -7   -1.41   11.43
   0  -3  -7    6.07   21.41
   0  -3  -7   11.50   13.08
   0   3  -7   17.15   13.15
   0   3  -7    1.81   19.79
   0  -3  -8 1727.11  105.78
   0  -3  -8 1255.43   77.43
   0   3  -8 1312.18   73.13
   0  -3  -8 1718.93  108.36
   0   3  -8 1802.48   91.52
   0   3  -8 1666.28  107.64
   0  -3  -8 1679.25   94.15
   0  -3  -9   25.39   20.83
   0   3  -9   18.22   16.43
   0  -3  -9   22.27   10.61
   0   3  -9    8.12    7.52
   0   3  -9   26.54   16.25
   0  -3  -9   17.07   14.79
   0   3 -10 1239.00   87.97
   0   3 -10 1195.89   71.60
   0  -3 -10 1121.66   84.69
   0   3 -10 1227.90   84.38
   0   3 -11    1.99   16.43
   0  -3 -11   13.59   15.53
   0   3 -11   33.88   20.48
   0  -3 -12 1524.84   69.79
   0   3 -12 1507.89   67.27
   0   3 -12 1501.11   67.09
   0   3 -12 1603.31  111.84
   0  -3 -12 1447.56   67.00
   0   3 -12 1510.14   70.57
   0  -3 -12 1517.27   70.33
   0  -3 -12 1407.34   67.60
   0   3 -12 1600.70  111.11
   0   3 -12 1564.55   69.64
   0   3 -12 1447.74   66.32
   0  -3 -12 1422.16  105.49
   0  -3 -13   49.65   12.03
   0  -3 -13   18.45    8.89
   0   3 -13   16.84    8.40
   0   3 -13   27.92   21.71
   0   3 -13   17.88    9.02
   0  -3 -13   25.06   10.03
   0  -3 -13  -29.37    8.15
   0  -3 -13    7.70    7.25
   0   3 -13   12.48    9.69
   0  -3 -13   18.78   19.09
   0   3 -13   39.84   21.96
   0  -3 -14  389.03   30.94
   0   3 -14  459.56   32.43
   0   3 -14  430.35   62.19
   0  -3 -14  419.45   29.83
   0   3 -14  429.05   30.02
   0   3 -14  465.96   32.01
   0  -3 -14  428.56   32.38
   0  -3 -14  242.39   19.68
   0  -3 -14  253.69   32.08
   0   3 -14  403.11   32.43
   0  -3 -14  429.55   31.68
   0   3 -14  453.40   60.81
   0  -3 -14  536.95   64.88
   0  -3 -15   11.86    9.91
   0   3 -15    9.93    8.46
   0  -3 -15    5.77    9.37
   0   3 -15   29.61   13.82
   0  -3 -15   14.25    9.42
   0   3 -15    7.13    9.29
   0  -3 -15   12.76   10.30
   0   3 -15    6.63    9.45
   0  -3 -16  115.15   18.04
   0   3 -16  105.38   16.22
   0  -3 -16  114.26   17.97
   0  -3 -16  101.80   16.40
   0   3 -16  128.56   19.74
   0  -3 -16   91.67   14.55
   0  -3 -16  134.29   19.28
   0  -3 -16   30.49   30.06
   0   3 -16  103.24   17.84
   0   3 -16  117.38   16.87
   0   3 -16  130.02   17.89
   0  -3 -16  112.16   16.88
   0   3 -17    1.58    8.82
   0  -3 -17    6.20   10.43
   0  -3 -17  -12.79   11.98
   0   3 -17   -3.42   12.19
   0  -3 -17   -1.61   11.30
   0  -3 -17    1.82    7.22
   0   3 -17    4.32   11.73
   0  -3 -17    4.64   10.03
   0   3 -17   -3.30    9.65
   0  -3 -17   -5.48   10.03
   0   3 -17   -1.95    8.77
   0   3 -18   13.96    9.47
   0   3 -18   15.55    8.52
   0  -3 -18    6.86    6.52
   0   3 -18    4.48   10.19
   0  -3 -18    3.91    9.19
   0  -3 -18   13.83    9.95
   0  -3 -18   17.90   10.93
   0   3 -18   -2.29   11.10
   0  -3 -18    4.90    9.81
   0   3 -18    5.67    8.62
   0   3 -19   10.61    6.94
   0  -3 -19    1.29    7.34
   0   3 -19    4.61    9.42
   0  -3 -19    4.40    6.06
   0   3 -19    7.40    9.21
   0   3 -19    6.03   10.01
   0  -3 -19   -1.60    8.84
   0  -3 -19    5.44    8.29
   0   3 -19    4.21    6.63
   0   3 -20   14.56    5.79
   0  -3 -20    7.39    6.92
   0   3 -20    8.88    6.67
   0   3 -20    9.61    7.30
   0  -3 -20   12.06    7.29
   0  -3 -20   11.70    7.08
   0   3 -20    6.64    4.70
   0   3 -21    7.39    5.53
   0  -4   0   54.13   16.13
   0  -4   1  416.59   31.64
   0  -4  -1  409.40   34.42
   0   4  -1  406.40   30.01
   0  -4  -2  885.17   54.57
   0  -4   2  965.40   48.52
   0  -4  -3 1443.01   78.09
   0  -4  -3 1480.15   79.90
   0   4  -3 1461.07   61.77
   0   4  -3 1578.31   72.39
   0  -4  -4  254.56   30.25
   0  -4  -4  238.86   31.67
   0   4  -4  248.72   17.74
   0   4  -4  228.11   30.75
   0   4  -4  266.33   22.84
   0  -4  -5   25.78   15.07
   0   4  -5   13.83    6.94
   0  -4  -5   17.15   18.21
   0  -4  -5   13.47   11.38
   0   4  -5   12.90    3.16
   0   4  -5   12.20   19.80
   0   4  -5   14.98   11.09
   0  -4  -6  491.99   50.97
   0  -4  -6  481.22   42.94
   0  -4  -6  463.25   50.73
   0  -4  -6  490.17   41.95
   0   4  -6  492.09   51.18
   0   4  -6  532.69   39.88
   0  -4  -7  205.56   37.01
   0  -4  -7  290.53   33.65
   0  -4  -7  282.87   42.82
   0   4  -7  270.29   41.68
   0  -4  -7  249.72   32.24
   0   4  -7  248.71   28.80
   0   4  -8   20.45    9.30
   0  -4  -8   23.16   12.48
   0  -4  -8   46.24   22.77
   0  -4  -8   23.47   24.70
   0  -4  -8   26.48   16.46
   0   4  -8   33.59   14.87
   0   4  -8   13.11   23.99
   0   4  -9   79.31   16.70
   0  -4  -9  119.13   22.85
   0  -4  -9   97.88   31.42
   0  -4  -9  125.58   33.61
   0  -4  -9  155.50   29.43
   0   4  -9  109.41   22.96
   0   4  -9  108.49   36.05
   0  -4 -10    0.48   17.39
   0   4 -10   16.33   10.20
   0   4 -10   19.17   17.61
   0  -4 -10   11.95   14.18
   0   4 -10   19.68   12.42
   0   4 -11  594.53   63.34
   0  -4 -11  508.19   57.34
   0   4 -11  588.42   57.36
   0  -4 -12   36.23   10.78
   0  -4 -12   34.56   10.10
   0   4 -12   36.87    9.20
   0   4 -12   37.40    8.65
   0   4 -12   28.47   20.74
   0  -4 -12   40.06   11.40
   0   4 -12   52.54   12.97
   0  -4 -12    4.27    7.25
   0  -4 -12   33.54    9.92
   0   4 -12   38.93   10.06
   0  -4 -12   31.07   20.59
   0   4 -12   46.57   23.13
   0   4 -12   51.46   12.23
   0  -4 -13  185.01   20.83
   0   4 -13  215.37   43.65
   0   4 -13  188.17   19.12
   0  -4 -13  169.20   18.25
   0   4 -13  175.34   18.12
   0  -4 -13  191.44   21.31
   0  -4 -13   75.75   11.64
   0   4 -13  195.25   21.91
   0  -4 -13  160.42   19.02
   0   4 -13  170.68   34.54
   0  -4 -13  202.18   39.88
   0  -4 -14  290.66   26.12
   0   4 -14  352.56   27.84
   0   4 -14  328.85   25.77
   0   4 -14  288.36   51.74
   0  -4 -14  277.62   24.23
   0   4 -14  304.30   24.85
   0  -4 -14  299.75   26.82
   0  -4 -14  279.51   25.34
   0   4 -14  285.87   27.12
   0  -4 -14  252.08   45.92
   0  -4 -15  473.23   34.62
   0   4 -15  400.06   31.62
   0  -4 -15  500.58   35.87
   0  -4 -15  433.06   33.09
   0   4 -15  501.75   36.76
   0  -4 -15  483.32   32.40
   0   4 -15  505.23   32.83
   0   4 -15  485.27   32.94
   0   4 -16   57.41   12.85
   0  -4 -16   50.82   13.83
   0  -4 -16   49.65   10.95
   0   4 -16   61.81   15.05
   0   4 -16   78.43   17.62
   0  -4 -16   39.54   12.50
   0  -4 -16   50.59   13.71
   0  -4 -16   48.23   12.98
   0  -4 -16   41.81   37.29
   0   4 -16   58.26   13.19
   0   4 -16   54.92   11.95
   0  -4 -16   46.20   12.59
   0   4 -17  391.58   31.12
   0  -4 -17  457.64   34.11
   0   4 -17  537.41   36.07
   0  -4 -17  496.73   35.89
   0  -4 -17  483.62   31.06
   0  -4 -17  485.70   34.97
   0  -4 -17  503.88   33.30
   0   4 -17  399.51   31.49
   0   4 -17  497.68   32.42
   0   4 -17  516.30   33.40
   0  -4 -17  447.09   32.17
   0   4 -18   44.76   10.07
   0  -4 -18   51.64   12.52
   0  -4 -18   48.45   12.30
   0   4 -18   61.19   14.76
   0   4 -18   61.09   13.41
   0   4 -18   43.75   10.18
   0  -4 -18   62.11   12.95
   0   4 -18   61.30   11.34
   0   4 -19  119.99   13.75
   0  -4 -19  129.95   15.26
   0   4 -19  125.37   16.34
   0   4 -19  110.96   13.30
   0  -4 -19  128.38   14.92
   0   4 -19  128.77   15.36
   0  -4 -19  115.00   15.13
   0  -4 -20  193.21   16.37
   0   4 -20  212.76   16.39
   0   4 -20  199.35   17.30
   0  -4 -20  203.28   17.19
   0  -4 -20  185.69   15.76
   0   4 -21  121.39   11.20
   0  -5   0   -4.27   13.34
   0  -5   1   13.41   13.44
   0  -5  -1   17.07   16.72
   0   5  -1    8.60   13.59
   0  -5   2   52.90   14.57
   0  -5  -2   68.32   22.09
   0   5  -2   66.70   16.22
   0  -5  -3  377.68   38.60
   0  -5  -3  356.47   38.98
   0   5  -3  368.14   33.46
   0  -5  -4 1095.89   69.48
   0  -5  -4 1045.43   71.82
   0  -5  -4 1007.45   56.26
   0   5  -4 1113.60   73.12
   0   5  -4 1021.82   50.89
   0  -5  -5  447.68   42.48
   0   5  -5  335.02   23.99
   0  -5  -5  419.97   47.40
   0   5  -5  420.09   46.60
   0   5  -5  428.20   23.43
   0  -5  -5  447.30   36.41
   0   5  -5  427.98   32.20
   0  -5  -6  841.89   61.82
   0  -5  -6  787.74   67.85
   0   5  -6  627.08   38.00
   0  -5  -6  832.95   55.40
   0   5  -6  845.72   50.84
   0   5  -6  795.66   67.84
   0  -5  -7  884.05   64.61
   0  -5  -7  757.20   69.40
   0  -5  -7  826.86   74.31
   0   5  -7  769.27   72.28
   0  -5  -7  881.51   61.75
   0   5  -7  819.90   56.01
   0  -5  -8 1854.21  101.59
   0  -5  -8 1585.21  111.19
   0  -5  -8 1547.74  112.94
   0  -5  -8 1721.56   98.59
   0   5  -8 1720.40   92.19
   0   5  -8 1619.78  114.60
   0   5  -9  726.30   54.41
   0  -5  -9  813.53   65.07
   0  -5  -9  926.61   82.96
   0  -5  -9  854.11   83.95
   0  -5  -9  943.51   70.86
   0   5  -9 1010.94   90.15
   0   5  -9  963.81   65.51
   0  -5 -10  238.84   45.21
   0   5 -10  316.04   34.40
   0   5 -10  219.50   33.04
   0   5 -10  232.66   47.56
   0  -5 -10  241.43   37.51
   0  -5 -11  892.68   47.21
   0   5 -11  804.54   42.75
   0   5 -11  907.61   80.68
   0  -5 -11  756.54   43.51
   0  -5 -11  811.57   46.33
   0   5 -11  819.75   46.29
   0   5 -11  852.59   45.24
   0   5 -11  849.79   69.02
   0   5 -11  883.52   46.36
   0  -5 -11  797.81   71.91
   0  -5 -12  816.49   45.43
   0   5 -12  810.23   42.38
   0   5 -12  763.10   39.61
   0   5 -12  808.54   79.31
   0  -5 -12  740.70   40.75
   0  -5 -12  765.68   42.90
   0  -5 -12  781.14   45.41
   0   5 -12  786.11   45.73
   0  -5 -12  735.28   71.97
   0   5 -12  835.93   44.46
   0   5 -12  915.52   74.32
   0  -5 -13   66.67   14.19
   0   5 -13   70.21   30.30
   0  -5 -13   56.16   11.85
   0   5 -13   73.25   12.76
   0   5 -13   46.76   10.69
   0  -5 -13   71.38   14.60
   0  -5 -13   59.85   12.63
   0   5 -13   77.85   16.16
   0  -5 -13   91.35   11.44
   0  -5 -13   40.86   22.31
   0  -5 -14  470.57   34.07
   0   5 -14  593.86   73.22
   0  -5 -14  491.36   31.91
   0   5 -14  469.53   30.32
   0   5 -14  491.74   32.90
   0   5 -14  514.93   37.18
   0  -5 -14  503.03   34.43
   0  -5 -14  468.91   34.55
   0  -5 -14  273.67   20.56
   0  -5 -14  175.25   37.00
   0  -5 -14  514.03   63.67
   0  -5 -15   79.00   15.85
   0   5 -15   64.01   13.54
   0  -5 -15   47.44   12.12
   0  -5 -15   54.25   14.75
   0   5 -15   53.86   14.05
   0  -5 -15   65.27   14.39
   0  -5 -15   63.46   13.52
   0   5 -15   69.93   13.17
   0   5 -15   55.64   13.00
   0   5 -16   -3.37    8.84
   0  -5 -16    0.36   10.58
   0   5 -16    4.01   10.66
   0  -5 -16    8.17   11.96
   0  -5 -16    7.08    9.41
   0  -5 -16  -40.01   42.39
   0  -5 -16    9.96   10.38
   0   5 -16    7.79    7.91
   0   5 -16    5.63    9.65
   0   5 -17   12.93    7.52
   0  -5 -17    4.07    8.81
   0  -5 -17    9.12   10.02
   0   5 -17   14.71   10.44
   0  -5 -17    8.99    9.34
   0   5 -17   28.75   10.51
   0   5 -17   27.17    9.39
   0   5 -18    9.69    6.48
   0   5 -18   27.21    8.64
   0  -5 -18   11.70    8.86
   0   5 -18   15.46    8.79
   0   5 -18   15.79   11.06
   0  -5 -18   16.26    9.85
   0  -5 -18   21.33    9.94
   0   5 -19    2.54    5.55
   0  -5 -19   -2.48    7.46
   0   5 -19    0.97    6.75
   0   5 -19   -0.31    5.41
   0   5 -19    1.04    9.11
   0  -5 -19   -0.46    7.06
   0  -5 -19   -3.73    7.79
   0  -5 -20    6.46    5.70
   0   5 -20    5.59    7.34
   0   5 -20   11.69    5.60
   0  -5 -20   10.05    5.58
   0  -5 -20   16.86    7.07
   0  -6   0 4372.13  181.97
   0  -6   1   23.38   17.86
   0  -6  -1   38.83   21.74
   0   6  -1   20.26   16.91
   0  -6  -1   23.54    5.86
   0  -6   2 1058.06   62.15
   0  -6  -2  988.58   68.83
   0  -6  -2  984.79   47.30
   0   6  -2 1040.01   62.27
   0  -6  -3  281.55   37.59
   0  -6  -3  260.15   23.26
   0   6  -3  260.42   30.55
   0  -6  -4 1782.75   97.22
   0  -6  -4 1651.67   99.33
   0   6  -4 1838.85   88.24
   0  -6  -5   74.79   22.79
   0  -6  -5   84.40   27.49
   0   6  -5   60.36   10.61
   0   6  -5   77.13   12.03
   0  -6  -5   62.47   16.13
   0   6  -5   89.47   30.79
   0  -6  -6  937.36   69.13
   0   6  -6  672.56   40.39
   0  -6  -6  817.92   73.24
   0  -6  -6  801.31   55.55
   0   6  -6  934.24   76.75
   0   6  -6  874.63   51.84
   0  -6  -7   -9.94   18.45
   0  -6  -7   -3.13   16.07
   0  -6  -7   11.40   20.75
   0   6  -7   13.91   21.64
   0  -6  -7    3.23   11.96
   0   6  -7   14.05   11.48
   0  -6  -8   83.24   25.00
   0  -6  -8   36.30   23.62
   0  -6  -8   52.86   27.50
   0   6  -8   49.60   15.80
   0   6  -8   39.94   26.96
   0  -6  -8   50.32   18.39
   0  -6  -9   51.89   20.00
   0  -6  -9   16.02   18.84
   0  -6  -9   34.41   23.82
   0   6  -9   62.89   29.24
   0   6  -9   57.95   17.52
   0  -6  -9   29.99   16.32
   0  -6 -10   18.69   13.18
   0   6 -10   40.69   15.49
   0  -6 -10   20.86   24.06
   0  -6 -10   33.67   24.97
   0   6 -10    6.84   27.22
   0   6 -10   30.15   15.41
   0  -6 -10    5.80   15.93
   0  -6 -11    9.06    8.60
   0   6 -11    3.83    7.82
   0   6 -11   -3.38   22.07
   0  -6 -11   23.27   23.56
   0  -6 -11   -5.89    7.83
   0   6 -11    4.61    6.73
   0  -6 -11    2.01    6.79
   0   6 -11    1.73    8.21
   0  -6 -11    8.03    8.78
   0  -6 -11   12.22    7.35
   0   6 -11   -1.03    8.22
   0   6 -11    1.55    7.72
   0  -6 -11   24.16   19.84
   0  -6 -12  508.48   35.11
   0   6 -12  531.81   64.68
   0  -6 -12  473.69   30.78
   0   6 -12  486.84   31.91
   0  -6 -12  466.60   32.61
   0  -6 -12  555.57   36.89
   0  -6 -12  369.17   24.35
   0  -6 -12  472.27   56.85
   0   6 -12  541.48   35.19
   0   6 -12  476.64   33.03
   0  -6 -13   10.48    9.42
   0  -6 -13    2.90    7.44
   0   6 -13   -1.82   20.73
   0   6 -13   -0.46    7.73
   0  -6 -13   15.70   10.69
   0  -6 -13    5.86    8.76
   0   6 -13   10.54    8.30
   0  -6 -13   -5.57   20.45
   0  -6 -14  815.05   49.21
   0  -6 -14  844.19   46.08
   0   6 -14  919.11   48.26
   0  -6 -14  771.51   36.80
   0  -6 -14  797.57   49.58
   0  -6 -14  831.49   48.25
   0  -6 -14  861.61   46.08
   0   6 -14  931.62   48.84
   0   6 -15   26.48    9.45
   0   6 -15   16.85   10.62
   0  -6 -15    8.49    9.26
   0  -6 -15   10.86    7.73
   0   6 -15   10.53   10.36
   0  -6 -15   24.66   10.94
   0   6 -16  259.89   24.19
   0  -6 -16  320.58   27.78
   0  -6 -16  306.49   25.36
   0   6 -16  302.96   25.64
   0   6 -16  297.65   25.68
   0  -6 -16  263.57   23.87
   0   6 -17   31.86    9.39
   0  -6 -17   34.99   11.31
   0   6 -17   42.63   11.41
   0   6 -17   28.03   13.91
   0  -6 -17   25.41    9.75
   0   6 -17   35.33   10.66
   0  -6 -17   25.74   10.15
   0   6 -18  420.35   27.79
   0  -6 -18  443.11   29.11
   0  -6 -18  440.97   31.03
   0   6 -18  460.06   29.03
   0  -6 -18  441.83   28.27
   0   6 -18  539.83   34.02
   0   6 -18  426.96   28.13
   0  -6 -19   24.92    8.02
   0   6 -19   14.67    8.90
   0  -6 -19   15.19    6.86
   0  -6 -19   14.52    7.93
   0   6 -19   23.78    7.65
   0  -6 -20  365.02   22.30
   0   6 -20  370.44   22.83
   0  -7   0    7.68   16.78
   0   7   0    6.70   17.02
   0  -7   1    5.45   17.09
   0  -7  -1    2.99   19.47
   0  -7  -1   -0.22    2.91
   0   7  -1   -8.08   15.89
   0  -7   2  186.35   28.17
   0  -7  -2  141.48   30.04
   0   7  -2  215.98   30.42
   0  -7  -2  122.65   13.20
   0  -7  -3  482.29   50.34
   0   7  -3  472.53   42.71
   0  -7  -4  -12.72   20.61
   0  -7  -4   12.40   22.67
   0  -7  -4    4.15    8.04
   0   7  -4   -3.87   16.31
   0  -7  -5 1116.65   81.35
   0  -7  -5 1194.63   89.68
   0  -7  -5 1006.28   62.20
   0   7  -5 1224.50   90.34
   0  -7  -6   91.80   26.97
   0  -7  -6  101.64   32.50
   0  -7  -6   94.80   20.30
   0   7  -6  108.38   32.60
   0  -7  -7   86.06   26.06
   0  -7  -7   74.29   30.30
   0  -7  -7   73.05   19.12
   0   7  -7  103.50   33.35
   0  -7  -8  898.92   75.35
   0  -7  -8  888.27   82.84
   0  -7  -8  808.01   83.60
   0   7  -8  911.69   88.93
   0  -7  -8  953.47   69.04
   0  -7  -9 2007.68  139.69
   0  -7  -9 1899.35  124.89
   0  -7  -9 2386.98  155.71
   0  -7  -9 2476.30  128.56
   0   7  -9 2570.09  161.24
   0  -7 -10   16.54    8.19
   0  -7 -10   11.15   23.36
   0  -7 -10  -28.04   17.27
   0   7 -10   15.63    7.62
   0  -7 -10   16.93   18.52
   0  -7 -10   55.69    9.88
   0  -7 -10   19.69    9.45
   0  -7 -10    5.55    6.32
   0   7 -10   25.60    8.80
   0  -7 -10   13.93   16.94
   0   7 -10   11.58   29.04
   0  -7 -11  901.37   49.23
   0   7 -11  872.85   45.06
   0  -7 -11  899.15   92.28
   0  -7 -11  833.86   43.39
   0  -7 -11  873.98   46.74
   0  -7 -11  572.66   35.33
   0  -7 -11  939.66   50.58
   0   7 -11  940.12  102.87
   0   7 -11  854.03   46.98
   0  -7 -11 1245.18   89.31
   0   7 -11  968.69   48.58
   0   7 -12   23.31    9.69
   0   7 -12   37.58   26.37
   0  -7 -12   10.65    7.31
   0  -7 -12   19.88   11.10
   0  -7 -12   16.62    8.87
   0  -7 -12   -4.09   14.48
   0   7 -12    4.91    7.83
   0  -7 -13  111.11   15.64
   0   7 -13  127.62   17.43
   0   7 -13  150.00   41.14
   0  -7 -13  114.14   17.31
   0  -7 -13   81.71   13.40
   0   7 -13  117.13   15.33
   0   7 -13  104.14   16.43
   0  -7 -13  142.42   35.75
   0  -7 -14    7.06    7.93
   0   7 -14   17.78   10.70
   0   7 -14    2.19    8.43
   0  -7 -14   16.72    9.43
   0  -7 -14   10.75    7.33
   0   7 -14   12.31    8.74
   0   7 -15   99.20   16.00
   0  -7 -15   89.22   16.68
   0  -7 -15   67.02   13.22
   0   7 -15  101.23   17.07
   0  -7 -15  107.14   16.23
   0   7 -16   38.48   10.47
   0  -7 -16   26.94    9.19
   0   7 -16   39.18   10.70
   0  -7 -16   33.83   11.66
   0   7 -16   43.32   12.23
   0  -7 -16   41.61   11.65
   0   7 -17    7.79    5.82
   0  -7 -17    3.41    9.18
   0   7 -17   13.66   10.92
   0   7 -17   18.09    8.29
   0  -7 -17    9.29    6.16
   0  -7 -17    1.96    7.63
   0   7 -17   13.69    8.91
   0   7 -18    5.45    6.07
   0  -7 -18    1.18    7.25
   0   7 -18   11.04    6.74
   0  -7 -18   10.96    8.52
   0   7 -18   -4.98   10.13
   0  -7 -18    6.21    6.95
   0   7 -18    6.69    6.20
   0  -7 -19   42.81    8.80
   0   7 -19   43.65   10.33
   0  -7 -20   37.42    6.96
   0   7 -20   37.05    7.52
   0  -8   0 2953.97  150.00
   0   8   0 3242.92  147.98
   0  -8  -1  480.76   52.56
   0  -8   1  465.10   47.90
   0   8  -1  479.53   47.28
   0  -8  -2 1193.83   85.90
   0  -8   2 1197.07   77.12
   0   8  -2 1084.83   74.50
   0  -8  -3  838.44   70.20
   0   8  -3  880.10   63.27
   0  -8  -4  152.94   34.14
   0  -8  -4  140.36   35.37
   0  -8  -4   97.80   15.60
   0   8  -4  131.40   26.44
   0  -8  -5  373.12   48.55
   0  -8  -5  351.51   52.09
   0   8  -5  383.69   53.79
   0  -8  -5  283.31   29.48
   0  -8  -6  469.63   54.27
   0  -8  -6  479.48   61.50
   0   8  -6  535.20   64.55
   0  -8  -6  371.99   37.10
   0  -8  -7   -8.16   17.25
   0  -8  -7   -9.94   23.71
   0  -8  -7   -2.77    8.99
   0   8  -7   -4.82   25.48
   0  -8  -8  363.16   54.01
   0  -8  -8  360.72   48.61
   0  -8  -8  399.72   62.19
   0   8  -8  476.65   66.04
   0  -8  -8  353.32   40.86
   0  -8  -9   15.25   21.40
   0  -8  -9   -8.46   14.15
   0  -8  -9    4.04   22.46
   0  -8  -9   12.69   13.16
   0   8  -9   -2.74   22.09
   0  -8 -10   29.64   28.22
   0  -8 -10   27.35   18.32
   0  -8 -10   43.53   22.45
   0   8 -10   42.02   10.36
   0  -8 -10   50.50   11.65
   0  -8 -10   50.38   19.43
   0   8 -10   47.60   11.64
   0   8 -10   65.39   12.10
   0   8 -10   40.10   28.22
   0  -8 -11   92.99   36.53
   0  -8 -11   95.71   13.74
   0  -8 -11   62.06   29.65
   0   8 -11  107.72   15.45
   0  -8 -11  111.42   16.45
   0  -8 -11  108.11   27.09
   0   8 -11  120.11   43.46
   0   8 -11  102.56   16.32
   0   8 -12   43.37   11.74
   0   8 -12   14.98   22.09
   0  -8 -12   18.08    7.91
   0  -8 -12   33.28   11.63
   0  -8 -12   28.56   19.86
   0   8 -12   38.51   12.17
   0  -8 -13   60.07   12.91
   0   8 -13   66.78   14.66
   0  -8 -13   86.32   15.88
   0   8 -13   50.27   13.03
   0  -8 -14  181.39   21.58
   0   8 -14  255.38   26.15
   0  -8 -14  241.47   26.23
   0   8 -14  188.10   23.50
   0  -8 -15  509.41   33.09
   0   8 -15  513.88   35.17
   0  -8 -15  462.35   34.70
   0  -8 -15  471.04   30.66
   0   8 -15  534.44   35.59
   0   8 -16  213.83   20.98
   0   8 -16  321.37   27.30
   0  -8 -16  279.94   25.42
   0  -8 -16  266.59   21.40
   0   8 -16  303.04   25.52
   0  -8 -16  293.17   23.68
   0   8 -17  422.05   28.43
   0  -8 -17  421.03   27.94
   0  -8 -17  395.77   29.30
   0   8 -17  439.36   30.46
   0   8 -18  397.19   24.93
   0  -8 -18  348.11   23.59
   0   8 -18  423.95   27.34
   0  -8 -18  354.58   25.83
   0  -8 -19   55.09    8.15
   0  -8 -19   45.06    8.93
   0   8 -19   51.53    9.38
   0  -9   0   15.33   19.49
   0   9   0    4.16   20.70
   0  -9  -1   18.13   24.86
   0  -9   1   23.16   20.14
   0   9  -1   19.53   20.41
   0   9   1   12.86   19.05
   0  -9   2  603.49   55.74
   0  -9  -2  528.16   60.66
   0   9  -2  571.41   54.53
   0  -9  -3   38.57   24.25
   0   9  -3   39.29   21.36
   0  -9  -4   93.18   29.81
   0  -9  -4  128.97   37.98
   0   9  -4  106.83   26.76
   0  -9  -5   -6.63   19.49
   0  -9  -5  -17.66   28.90
   0   9  -5    6.58   23.83
   0  -9  -6 2053.58  131.13
   0  -9  -6 2223.33  146.73
   0  -9  -6 2016.98  102.84
   0   9  -6 2214.78  145.31
   0  -9  -7  263.28   44.03
   0  -9  -7  277.92   52.06
   0  -9  -7  254.43   32.28
   0   9  -7  197.81   44.30
   0  -9  -8  598.84   72.53
   0  -9  -8  611.55   69.06
   0  -9  -8  734.33   85.44
   0   9  -8  758.85   87.15
   0  -9  -8  779.64   60.66
   0  -9  -9    9.65   24.48
   0  -9  -9   -1.97    7.82
   0  -9  -9    4.80   19.12
   0  -9  -9   26.62   22.16
   0  -9  -9    2.53    7.32
   0   9  -9   13.19   25.90
   0  -9  -9    7.97   10.72
   0   9  -9   13.76    7.81
   0   9  -9    9.22    8.89
   0  -9 -10 1202.82  117.26
   0   9 -10 1209.77   57.27
   0  -9 -10  904.09   88.49
   0  -9 -10  846.38   93.37
   0  -9 -10 1102.78   47.58
   0  -9 -10 1214.14   59.18
   0   9 -10 1157.33   59.56
   0   9 -10 1210.09  119.58
   0  -9 -10 1141.62   85.07
   0  -9 -11  -21.62   30.18
   0   9 -11   25.28   10.39
   0  -9 -11   -9.62   24.03
   0  -9 -11   23.41   10.47
   0   9 -11   22.41   11.61
   0   9 -11   10.68   27.27
   0  -9 -11   19.16   18.60
   0   9 -12  762.44   45.82
   0   9 -12  886.90   92.48
   0  -9 -12  779.54   47.49
   0   9 -12  714.60   46.58
   0  -9 -13    3.63    6.53
   0   9 -13    7.36    9.98
   0  -9 -13    0.91    8.83
   0   9 -13   -1.24    8.01
   0  -9 -14  171.13   18.35
   0   9 -14  241.39   23.28
   0  -9 -14  208.20   22.85
   0   9 -14  149.89   19.74
   0  -9 -15   -2.01    6.87
   0   9 -15    7.71   10.02
   0   9 -15   -4.07   11.11
   0  -9 -15   -2.56    9.60
   0   9 -15    7.86    9.59
   0   9 -16   99.08   13.94
   0  -9 -16   89.90   15.15
   0   9 -16   95.93   15.25
   0   9 -16   97.88   15.04
   0  -9 -16   71.73   11.61
   0   9 -17    8.36    5.96
   0   9 -17    7.25    7.13
   0  -9 -17   12.62    7.37
   0  -9 -17    0.09    8.38
   0   9 -17   11.47    8.76
   0  -9 -18    1.06    4.96
   0   9 -18    8.08    5.68
   0   9 -18    4.70    7.36
   0  -9 -18   -2.03    6.43
   0  -9 -19    7.22    5.32
   0   9 -19    5.60    5.24
   0 -10   0  162.31   34.61
   0  10   0  172.59   34.64
   0 -10   1  891.79   76.34
   0 -10  -1  953.56   82.53
   0  10  -1  968.29   75.81
   0  10   1  942.20   75.61
   0 -10  -2   19.56   23.83
   0  10  -2   -3.46   17.56
   0  10   2   12.79   19.24
   0 -10  -3 1412.23  105.98
   0  10  -3 1350.54   92.86
   0 -10  -4    3.07   22.55
   0 -10  -4    5.77   21.47
   0  10  -4   -6.42   18.61
   0 -10  -5  215.40   42.98
   0 -10  -5  238.81   49.08
   0  10  -5  252.35   50.98
   0 -10  -6   25.45   24.54
   0 -10  -6    6.52   24.82
   0  10  -6   10.61   23.28
   0 -10  -7   72.56   26.10
   0 -10  -7   38.75   28.58
   0  10  -7   69.05   34.88
   0 -10  -8   35.35   10.64
   0 -10  -8   22.20   26.55
   0 -10  -8   45.82   24.25
   0 -10  -8   44.12   25.09
   0  10  -8   42.80   10.95
   0 -10  -8   41.62   10.96
   0  10  -8   40.01   12.19
   0  10  -8   60.89   32.31
   0 -10  -9   16.44   32.57
   0 -10  -9   26.20   10.25
   0 -10  -9   28.42   24.70
   0  10  -9   16.12    8.24
   0 -10  -9   13.23   21.39
   0  10  -9   23.59    8.79
   0 -10  -9   12.21    8.76
   0  10  -9   22.42   11.32
   0  10  -9   41.58   28.79
   0 -10 -10   32.53   21.98
   0 -10 -10   37.24   25.13
   0 -10 -10   19.04   19.61
   0  10 -10   25.98    9.71
   0 -10 -10   30.20    9.82
   0  10 -10   37.16   12.52
   0  10 -10   32.76   30.93
   0 -10 -11   -3.26   30.21
   0 -10 -11   61.81   29.65
   0  10 -11   40.84   11.55
   0 -10 -11   33.89   11.75
   0  10 -11   55.87   38.29
   0  10 -11   38.63   13.28
   0  10 -12   14.76    9.63
   0 -10 -12   11.60   10.16
   0  10 -12   12.26   10.16
   0  10 -13  200.61   21.98
   0 -10 -13  183.47   21.90
   0  10 -13  140.48   18.71
   0 -10 -14  111.89   14.12
   0  10 -14  128.11   17.69
   0  10 -14  107.37   15.85
   0 -10 -14  103.82   16.85
   0  10 -14  103.87   16.35
   0  10 -15  513.99   34.13
   0 -10 -15  505.38   30.79
   0 -10 -15  532.64   35.93
   0  10 -15  563.85   33.98
   0  10 -16    8.75    6.94
   0 -10 -16    7.70    6.09
   0  10 -16   -1.97    8.04
   0 -10 -16    9.19    9.04
   0  10 -16   -8.91    8.48
   0 -10 -17  424.86   25.38
   0  10 -17  510.30   29.56
   0  10 -17  460.62   28.06
   0 -10 -17  494.77   30.77
   0  10 -18    4.09    5.35
   0  10 -18    8.10    6.10
   0 -10 -18   -2.27    6.06
   0 -11   0   10.69   24.87
   0  11   0   -4.47   19.05
   0 -11  -1   -6.43   20.47
   0  11  -1    9.17   18.94
   0  11   1    6.66   19.79
   0 -11  -2  558.12   68.26
   0  11   2  536.41   59.86
   0  11  -2  542.75   60.21
   0 -11  -3  247.17   46.16
   0  11   3  261.88   43.12
   0  11  -3  214.29   37.81
   0 -11  -4  466.45   62.71
   0 -11  -4  517.12   71.10
   0  11  -4  484.63   56.13
   0 -11  -5   46.09   26.29
   0 -11  -5  112.34   40.15
   0  11  -5   84.63   36.99
   0 -11  -6  221.48   46.44
   0 -11  -6  250.78   52.23
   0 -11  -6  238.02   21.92
   0  11  -6  230.76   23.69
   0  11  -6  194.45   48.46
   0 -11  -7  409.16   30.11
   0 -11  -7  342.49   63.65
   0 -11  -7  480.06   65.27
   0  11  -7  444.29   30.98
   0  11  -7  437.86   29.09
   0  11  -7  440.93   34.35
   0  11  -7  415.21   67.51
   0 -11  -8 1170.22  120.09
   0 -11  -8 1257.15   61.94
   0 -11  -8 1219.45  108.05
   0  11  -8 1266.83   61.00
   0 -11  -8 1282.51   62.87
   0  11  -8 1285.52   59.59
   0  11  -8 1292.51   66.11
   0  11  -8 1248.86  122.44
   0 -11  -9  316.20   64.25
   0 -11  -9  309.63   26.76
   0 -11  -9  219.35   50.40
   0 -11  -9  286.88   52.73
   0  11  -9  344.30   26.34
   0 -11  -9  342.20   28.29
   0  11  -9  338.94   25.49
   0  11  -9  284.44   27.96
   0  11  -9  365.68   69.59
   0 -11 -10  418.72   73.42
   0  11 -10  429.30   31.55
   0 -11 -10  376.54   63.38
   0 -11 -10  482.35   34.73
   0  11 -10  446.20   29.83
   0  11 -10  441.38   77.50
   0  11 -10  436.64   34.53
   0  11 -11  511.26   34.45
   0 -11 -11  453.80   34.54
   0  11 -11  445.10   34.54
   0  11 -12  417.05   31.68
   0 -11 -12  398.32   32.20
   0  11 -12  371.21   31.49
   0  11 -13   60.40   13.63
   0  11 -13   52.84   11.78
   0 -11 -13   42.08   12.66
   0  11 -13   58.07   14.06
   0  11 -14  226.99   22.31
   0 -11 -14  203.30   22.02
   0  11 -14  199.26   19.30
   0  11 -14  188.58   21.65
   0  11 -15  116.56   16.11
   0  11 -15  100.30   13.61
   0 -11 -15   98.60   15.29
   0  11 -15   85.69   14.02
   0  11 -16   92.86   13.16
   0  11 -16   77.85   11.21
   0 -11 -16   87.43   13.98
   0  11 -16   73.15   11.97
   0  11 -17   21.34    7.43
   0  11 -17   24.17    7.17
   0 -11 -17   24.54    7.99
   0 -11 -18   10.42    5.46
   0 -12   0 1950.98  134.52
   0  12   0 1989.79  128.04
   0 -12  -1  135.40   38.42
   0  12  -1  111.04   31.06
   0  12   1  123.00   34.45
   0 -12  -2  822.23   86.45
   0  12  -2  756.25   74.09
   0  12   2  791.84   77.28
   0 -12  -3   -6.48   28.02
   0  12   3    1.75   19.19
   0  12  -3    5.81   18.73
   0 -12  -4  540.83   72.81
   0  12  -4  720.57   42.43
   0 -12  -4  653.56   39.03
   0 -12  -4  580.81   79.54
   0  12   4  544.00   66.70
   0  12  -4  624.13   39.96
   0  12  -4  558.13   63.89
   0 -12  -5  234.32   49.53
   0  12  -5  255.78   24.50
   0 -12  -5  244.92   22.59
   0 -12  -5  222.97   53.16
   0  12  -5  205.74   50.97
   0  12   5  187.45   41.55
   0  12  -5  225.25   23.61
   0 -12  -6  230.66   22.34
   0 -12  -6  139.05   48.63
   0  12  -6  242.25   23.58
   0 -12  -6  208.74   45.41
   0  12  -6  209.80   19.97
   0  12  -6  192.52   22.65
   0  12  -6  230.34   53.18
   0 -12  -7   11.64   25.06
   0 -12  -7    7.26    7.88
   0  12  -7    0.13    8.00
   0 -12  -7   19.94   26.59
   0  12  -7    1.92    6.46
   0  12  -7    1.94   28.36
   0  12  -7    5.43   10.05
   0 -12  -8   -0.24    7.71
   0 -12  -8  -11.53   26.82
   0  12  -8  -11.90    9.43
   0 -12  -8  -16.25   20.23
   0 -12  -8   -6.41    9.19
   0  12  -8   -5.39    6.72
   0  12  -8    0.73   11.06
   0  12  -8   30.88   33.93
   0 -12  -9   66.57   16.30
   0 -12  -9   18.31   33.43
   0  12  -9   27.54    9.17
   0 -12  -9    6.31   23.66
   0 -12  -9   37.26   11.40
   0  12  -9   18.94    7.37
   0  12  -9    8.48   32.17
   0  12  -9   20.27   12.42
   0  12 -10   29.87   11.46
   0  12 -10   16.36    8.34
   0 -12 -10   32.91   11.80
   0  12 -10   10.11    6.00
   0  12 -10   20.18   12.49
   0  12 -11   34.05   11.71
   0 -12 -11   42.45   13.03
   0  12 -11   12.83   10.89
   0  12 -12  206.77   21.93
   0 -12 -12  196.88   22.86
   0  12 -12  173.17   22.20
   0  12 -13   49.51   12.95
   0 -12 -13   29.13   11.37
   0  12 -13   52.20   13.58
   0  12 -14  412.83   29.70
   0 -12 -14  365.97   29.51
   0  12 -14  357.59   28.79
   0  12 -15   22.04    8.91
   0 -12 -15   21.69    9.29
   0  12 -15   40.70   10.93
   0  12 -16  303.53   22.34
   0 -12 -16  312.35   23.29
   0  12 -16  308.57   22.04
   0  12 -17   71.02    9.42
   0 -12 -17   68.99   10.15
   0  13   0   -5.78    8.45
   0 -13   0   -1.61    6.79
   0  13   0    4.87    7.30
   0  13   0  -21.34   22.74
   0  13   1   39.02   12.35
   0  13  -1   58.27   13.24
   0 -13   1   52.70   11.63
   0 -13  -1   46.69   10.96
   0  13  -1   46.23   11.51
   0  13  -1   28.16   23.69
   0  13   1   34.59   23.96
   0 -13  -2   88.28   35.02
   0  13   2   79.04   14.55
   0  13  -2   90.84   15.50
   0 -13  -2   73.67   13.78
   0  13   2   83.32   33.56
   0  13  -2   53.34   25.03
   0  13  -2   85.63   14.44
   0  13  -3  550.53   37.61
   0  13   3  521.61   36.24
   0 -13  -3  550.99   74.55
   0 -13  -3  553.75   36.37
   0 -13  -3  548.55   79.19
   0  13  -3  589.17   67.51
   0  13   3  490.52   64.32
   0  13  -3  539.09   37.04
   0 -13  -4    3.02   24.58
   0  13   4    1.04    9.60
   0  13  -4    8.38   10.28
   0 -13  -4    7.74   30.57
   0 -13  -4    4.22    7.13
   0  13  -4    6.96   10.15
   0  13   4   -0.97   20.24
   0 -13  -5  603.72   78.74
   0  13  -5  744.29   44.70
   0 -13  -5  664.15   41.44
   0 -13  -5  666.93   90.10
   0  13  -5  583.87   82.75
   0  13   5  560.42   71.74
   0  13  -5  598.33   42.41
   0 -13  -6   17.66   26.46
   0 -13  -6   38.62   12.00
   0  13  -6   34.93   11.48
   0 -13  -6   40.41   28.21
   0  13  -6   43.04   10.86
   0  13  -6   37.08   13.74
   0  13  -6   84.01   43.07
   0  13   6   27.62   27.77
   0 -13  -7  479.20   34.36
   0 -13  -7  545.96   84.39
   0  13  -7  476.34   34.90
   0 -13  -7  355.14   61.60
   0  13  -7  423.20   30.58
   0  13  -7  454.10   36.45
   0  13   7  434.48   63.25
   0  13  -7  392.51   72.67
   0 -13  -8    9.12   30.94
   0 -13  -8   -1.09    8.96
   0  13  -8   -3.58    9.37
   0 -13  -8    3.80   25.34
   0  13  -8    3.34    6.79
   0 -13  -8    0.93    8.86
   0  13  -8    1.68   11.41
   0  13   8  -10.00   24.22
   0  13  -8   19.75   30.10
   0 -13  -9 1236.95   61.16
   0  13  -9  925.75   54.38
   0  13  -9  937.99   52.23
   0 -13  -9 1105.41   59.90
   0 -13  -9 1390.32   64.22
   0  13   9  996.22  100.09
   0  13  -9 1304.83   66.02
   0  13 -10   19.90   10.10
   0  13 -10   20.79    8.97
   0  13 -10   20.80    7.80
   0 -13 -10   30.93   12.07
   0  13 -10   30.00   15.02
   0  13 -11  396.83   30.49
   0 -13 -11  415.16   32.76
   0  13 -11  375.42   32.35
   0  13 -12    1.56    8.84
   0 -13 -12    1.27    8.75
   0  13 -12   -1.90   10.78
   0  13 -13  301.00   25.99
   0 -13 -13  318.45   26.97
   0 -13 -13  330.41   42.43
   0  13 -13  290.22   26.40
   0  13 -14    5.15    7.66
   0 -13 -14   -1.68    8.37
   0  13 -14   -1.94    7.97
   0  13 -15  200.69   18.40
   0 -13 -15  176.44   17.99
   0  13 -15  179.52   17.94
   0  13 -16   27.72    7.34
   0 -13 -16   30.71    8.29
   0  13 -16   26.86    7.33
   0  13 -17   20.34    5.43
   0 -13 -17   12.21    5.31
   0  14   0  748.97   44.88
   0 -14   0  737.49   43.94
   0  14   0  679.44   76.65
   0  14  -1  350.52   29.10
   0  14   1  348.32   29.17
   0 -14   1  337.90   28.09
   0 -14  -1  392.08   29.96
   0  14  -1  292.63   51.58
   0  14  -1  347.35   28.92
   0  14   1  402.97   58.63
   0  14   2 1249.90   65.15
   0  14  -2 1353.68   66.05
   0 -14  -2 1354.27   65.15
   0 -14   2 1228.10   62.43
   0  14  -2 1307.07   64.89
   0  14   2 1187.50  105.45
   0  14  -2 1172.39  102.93
   0  14  -3  728.06   44.97
   0  14   3  656.69   43.49
   0 -14  -3  716.62   92.61
   0 -14  -3  724.43   43.98
   0  14  -3  729.71   78.07
   0  14  -3  687.61   43.99
   0  14   3  661.06   79.70
   0  14  -4  545.73   38.59
   0  14   4  519.15   37.43
   0 -14  -4  559.86   37.70
   0 -14  -4  448.83   76.39
   0  14  -4  529.72   38.16
   0  14   4  477.32   66.57
   0  14  -5  269.81   26.72
   0 -14  -5  215.28   51.33
   0 -14  -5  224.07   59.56
   0 -14  -5  241.41   24.84
   0  14  -5  240.98   58.14
   0  14   5  245.47   50.13
   0  14  -5  254.85   26.80
   0 -14  -6  148.45   20.02
   0 -14  -6  115.26   45.69
   0  14  -6  133.05   19.93
   0  14  -6  137.32   17.58
   0  14   6  107.65   33.50
   0  14  -6  208.96   57.22
   0  14  -6  130.17   20.98
   0 -14  -7   66.60   41.69
   0 -14  -7  135.99   18.84
   0  14  -7  151.32   20.56
   0  14  -7   90.26   14.07
   0  14  -7  133.11   44.95
   0  14   7  102.48   34.04
   0  14  -7  105.86   20.00
   0 -14  -8   18.44   10.75
   0  14  -8   18.95   11.12
   0 -14  -8   12.56   10.22
   0  14  -8   18.04    8.57
   0  14  -8   15.29   12.89
   0 -14  -9   60.57   15.10
   0  14  -9   49.41   12.19
   0 -14  -9   68.05   24.12
   0 -14  -9   59.67   14.10
   0  14  -9   49.16   10.76
   0  14  -9   61.49   17.05
   0  14 -10    4.23    9.10
   0  14 -10    2.76    7.27
   0  14 -10    9.23    7.37
   0 -14 -10    4.22    9.20
   0  14 -10    3.91   12.16
   0  14 -11   33.87   12.25
   0 -14 -11   88.99   34.19
   0 -14 -11   64.03   14.82
   0  14 -11   46.03   14.45
   0  14 -12   19.94   10.15
   0 -14 -12   20.34   10.04
   0  14 -12    9.74   10.85
   0  14 -13   45.13   11.34
   0 -14 -13   40.63   11.25
   0  14 -13   36.62   11.73
   0  14 -14  319.58   23.74
   0 -14 -14  373.14   35.60
   0 -14 -14  315.05   24.34
   0  14 -14  287.25   23.75
   0  14 -15   76.98   10.69
   0 -14 -15   68.92   11.00
   0  14 -15   55.99   10.29
   0  14 -16  191.43   14.49
   0 -14 -16  174.93   14.38
   0  15   0    3.18    9.93
   0 -15   0    1.38    8.32
   0  15   0  -17.65   19.78
   0  15  -1  125.88   18.40
   0  15   1  126.54   18.63
   0 -15  -1  163.61   20.17
   0 -15   1  118.34   17.45
   0  15   1   85.05   31.61
   0  15  -1  141.94   40.15
   0  15   2   33.32   12.40
   0  15  -2   49.29   13.46
   0 -15  -2   64.11   37.92
   0 -15   2   52.26   12.65
   0 -15  -2   58.83   13.84
   0  15   2   40.28   26.77
   0  15  -2   33.43   12.37
   0  15  -2   49.88   27.23
   0  15   3   39.10   12.52
   0  15  -3   43.16   13.76
   0 -15  -3   16.42   10.17
   0 -15   3   24.49   10.04
   0 -15  -3   24.31   27.99
   0  15  -3   19.64   11.80
   0  15   3   13.61   21.30
   0  15  -4  181.41   22.30
   0  15   4  168.08   21.27
   0 -15  -4  140.04   47.72
   0 -15   4  160.64   19.80
   0 -15  -4  209.64   23.07
   0  15   4  153.73   41.35
   0  15  -4  106.89   44.28
   0  15  -4  178.51   22.74
   0 -15  -5   -0.53   23.59
   0 -15  -5   -1.44   10.26
   0  15  -5    3.43   10.53
   0  15  -5    6.97    9.28
   0  15  -5   -7.98   38.62
   0  15   5   15.77   27.60
   0  15  -5    0.86   11.51
   0 -15  -6 1122.00   60.47
   0  15  -6 1153.95   61.63
   0  15  -6 1046.03   55.52
   0  15  -6 1103.01   62.50
   0 -15  -7  123.97   19.30
   0  15  -7  121.77   19.17
   0  15  -7   85.76   14.01
   0  15  -7  128.38   22.03
   0 -15  -8  573.73   38.99
   0  15  -8  621.52   39.51
   0 -15  -8  576.67   38.66
   0  15  -8  550.06   41.33
   0  15  -9  217.78   22.43
   0 -15  -9  240.89   24.43
   0  15  -9  153.70   17.21
   0  15  -9  192.58   24.74
   0  15 -10  258.91   23.93
   0  15 -10  337.11   27.83
   0 -15 -10  332.94   28.27
   0  15 -10  318.77   23.90
   0  15 -10  328.30   30.24
   0  15 -11   99.04   15.68
   0 -15 -11   82.93   15.00
   0  15 -11   92.81   17.64
   0  15 -12  376.44   27.74
   0 -15 -12  355.74   28.31
   0  15 -12  379.82   30.10
   0  15 -13    7.94    7.69
   0 -15 -13    6.48    7.37
   0 -15 -13    7.95   21.22
   0  15 -13    5.87    8.41
   0  15 -14   50.02    9.51
   0 -15 -14   54.87   10.34
   0  15 -14   47.38   10.37
   0  15 -15   17.60    6.08
   0 -15 -15   11.47    5.51
   0  16   0   11.02   10.73
   0 -16   0   17.22   10.99
   0  16   0   -0.50   23.78
   0  16   1  607.74   41.66
   0  16  -1  650.55   42.82
   0 -16   1  614.08   40.60
   0 -16  -1  631.15   41.38
   0  16   2   29.41   12.49
   0  16  -2   45.37   13.47
   0 -16   2   38.15   11.92
   0 -16  -2   34.68   12.06
   0  16  -3  746.72   47.42
   0  16   3  788.48   48.08
   0 -16   3  759.23   46.12
   0 -16  -3  832.17   48.77
   0  16  -3  748.98   47.64
   0  16  -4   23.51   12.29
   0  16   4   34.65   12.98
   0 -16  -4   46.18   14.09
   0 -16   4   27.55   10.50
   0  16  -4   37.76   14.17
   0 -16  -5  119.53   19.03
   0 -16   5  140.29   19.13
   0  16  -5  139.58   20.25
   0  16  -5  145.36   18.38
   0  16  -5  139.44   21.31
   0 -16  -6  113.43   18.91
   0 -16   6  118.78   17.27
   0  16  -6  104.36   18.29
   0  16  -6  127.52   16.97
   0  16  -6   88.16   18.98
   0 -16   7   45.53   12.15
   0 -16  -7   30.92   12.56
   0  16  -7   18.51   12.30
   0  16  -7   29.22   10.07
   0  16  -7   24.11   15.50
   0 -16   8    6.38    7.42
   0 -16  -8   -1.55   10.76
   0  16  -8    1.57   10.12
   0  16  -8   11.84    8.27
   0 -16  -8    6.96    9.53
   0  16  -8   -4.87   14.64
   0  16  -9   -2.12    8.67
   0  16  -9   -1.50    9.22
   0 -16  -9    0.42    8.55
   0  16  -9   -3.80    6.19
   0  16  -9   16.91   14.45
   0  16 -10    8.22    9.08
   0  16 -10    3.97    5.92
   0 -16 -10    7.69    8.90
   0  16 -10    6.19   12.86
   0  16 -11  106.49   15.03
   0 -16 -11   93.09   14.73
   0  16 -11   98.54   17.01
   0  16 -12    0.72    7.20
   0 -16 -12    1.71    7.15
   0  16 -12    5.07    9.47
   0  16 -13  151.16   15.11
   0 -16 -13  137.40   14.83
   0  16 -13  158.09   16.44
   0 -16 -14   15.94    5.75
   0  16 -14   14.69    6.53
   0  16 -15  383.13   20.54
   0 -17   0    2.76    9.29
   0  17   0   -9.28   11.88
   0 -17  -1    7.03    9.92
   0 -17   1   12.08   10.49
   0  17  -1    4.67   11.10
   0  17   1   20.81   11.68
   0 -17  -2   -2.70   10.72
   0 -17   2    4.36    8.96
   0  17  -2    7.15   10.87
   0  17   2   -0.53   10.29
   0 -17   3   33.90   11.47
   0 -17  -3   38.69   12.90
   0  17   3   32.53   12.88
   0  17  -3   24.03   12.18
   0 -17  -4  243.75   25.35
   0 -17   4  253.50   24.36
   0  17  -4  223.91   24.56
   0  17   4  230.30   23.85
   0  17  -4  222.28   22.88
   0 -17  -5  349.40   30.19
   0 -17   5  330.59   28.10
   0  17  -5  348.62   30.32
   0  17  -5  323.13   27.14
   0  17  -5  322.78   29.94
   0 -17  -6  592.05   39.80
   0 -17   6  548.22   36.60
   0  17  -6  538.59   38.21
   0  17  -6  491.82   34.37
   0  17  -6  597.68   41.66
   0 -17   7  134.82   18.24
   0 -17  -7  137.07   19.12
   0  17  -7  100.87   17.28
   0 -17  -7  123.42   17.65
   0  17  -7  120.24   15.69
   0  17  -7  114.89   19.92
   0 -17  -8  572.33   38.27
   0  17  -8  587.18   37.37
   0 -17  -8  555.50   36.57
   0  17  -8  507.39   32.83
   0  17  -8  586.45   41.23
   0  17  -9  238.86   21.39
   0  17  -9  234.84   21.21
   0 -17  -9  210.10   21.12
   0  17  -9  151.03   15.78
   0  17  -9  219.40   24.81
   0  17 -10  305.88   23.60
   0 -17 -10  281.61   23.44
   0  17 -10  250.08   19.26
   0  17 -10  326.64   27.80
   0  17 -11  287.05   22.10
   0 -17 -11  285.26   22.38
   0  17 -11  296.42   25.21
   0 -17 -12  235.01   18.92
   0  17 -12  255.86   19.46
   0 -17 -13   -0.84    4.71
   0  17 -13    3.54    5.34
   0  17 -14  199.79   14.25
   0 -18   0  557.71   37.99
   0  18   0  547.11   38.43
   0 -18  -1  183.77   21.08
   0 -18   1  154.61   19.89
   0  18   1  150.49   20.78
   0  18  -1  161.85   21.16
   0 -18  -2  120.58   17.68
   0 -18   2   97.36   16.46
   0  18  -2  110.72   17.97
   0  18   2  101.61   16.95
   0 -18  -3   59.74   14.35
   0 -18   3   42.01   12.26
   0  18  -3   43.65   12.59
   0  18  -3   50.46   14.61
   0  18   3   50.98   12.85
   0 -18  -4   90.25   16.56
   0 -18   4  118.71   16.65
   0  18  -4  113.12   16.09
   0  18  -4   97.20   17.64
   0  18   4  110.64   16.17
   0 -18  -5  113.63   17.87
   0 -18   5  115.20   16.08
   0  18  -5  105.61   15.56
   0  18  -5  115.25   18.34
   0 -18   6  235.43   21.99
   0 -18  -6  223.59   23.52
   0  18  -6  222.52   21.04
   0  18  -6  233.21   23.81
   0 -18  -7    4.30    9.97
   0 -18   7   -2.38    7.35
   0 -18  -7   -8.35    8.81
   0  18  -7   -1.70    6.92
   0  18  -7    8.53   10.38
   0 -18  -8    5.16    8.34
   0  18  -8   10.63    6.50
   0  18  -8   10.45    9.08
   0  18  -9   -3.61    5.38
   0 -18  -9    3.69    7.13
   0  18  -9    2.21    7.95
   0 -18 -10   10.09    7.14
   0  18 -10    3.78    6.97
   0 -18 -11   32.87    7.79
   0  18 -11   30.79    8.11
   0 -18 -12   47.95    7.69
   0  18 -12   64.50    8.82
   0  18 -13  118.80   10.36
   0 -19   0    4.57    9.83
   0  19   0   -7.97   10.35
   0 -19   1    0.85    8.64
   0 -19  -1    4.56   10.05
   0  19   1   -2.26   10.19
   0  19  -1    0.79   10.95
   0 -19  -2   35.12   11.48
   0 -19   2   40.90   11.16
   0  19  -2   42.27   12.60
   0  19  -2   21.10   12.02
   0  19   2   42.05   12.68
   0 -19   3  405.17   29.76
   0 -19  -3  403.62   30.83
   0  19  -3  434.67   30.20
   0  19   3  400.22   29.35
   0  19  -3  417.34   31.51
   0 -19   4    3.20    7.89
   0 -19  -4    1.90    9.26
   0  19  -4    7.95    8.91
   0  19   4   -2.88    7.14
   0  19  -4   14.94   12.39
   0 -19  -5  409.69   29.69
   0 -19   5  407.68   28.18
   0  19  -5  366.03   27.05
   0  19  -5  391.01   29.73
   0 -19  -6    4.01    8.84
   0 -19   6    3.22    7.47
   0 -19  -6    0.23    7.10
   0  19  -6    2.46    7.07
   0  19  -6    2.15    9.00
   0 -19  -7  334.93   24.42
   0  19  -7  320.43   22.63
   0  19  -7  305.63   24.90
   0 -19  -8    9.59    7.04
   0  19  -8    8.93    6.32
   0  19  -8    6.04    7.28
   0 -19  -9  514.25   28.47
   0  19  -9  449.35   24.93
   0  19  -9  426.82   26.90
   0 -19 -10   33.89    7.39
   0  19 -10   42.46    8.42
   0 -19 -11  210.06   14.85
   0  19 -11  239.37   16.16
   0 -20   0  314.68   24.88
   0  20   0  293.70   24.98
   0 -20  -1  162.37   17.74
   0 -20   1  150.22   17.17
   0  20  -1  126.50   16.47
   0  20  -1  155.08   18.66
   0  20   1  143.26   17.73
   0 -20   2  413.32   28.25
   0 -20  -2  372.33   27.82
   0  20  -2  376.26   27.58
   0  20   2  397.28   27.98
   0  20  -2  421.28   30.00
   0 -20   3   23.09    8.16
   0 -20  -3   29.01   10.11
   0  20  -3   31.58    9.79
   0  20  -3   26.38   11.11
   0  20   3   37.38   10.20
   0 -20   4  208.26   18.65
   0 -20  -4  227.98   20.56
   0  20  -4  202.69   19.00
   0  20  -4  222.12   21.08
   0 -20   5   -1.48    6.74
   0 -20  -5    9.31    8.01
   0  20  -5   10.43    7.50
   0 -20  -5    8.99    7.05
   0  20  -5   -0.71    8.45
   0  20  -6   44.98    9.06
   0 -20  -6   44.19    9.39
   0  20  -6   48.00   10.96
   0 -20  -7   17.99    7.08
   0  20  -7   13.75    6.24
   0  20  -7   17.92    6.64
   0 -20  -8   15.45    6.01
   0  20  -8   14.59    5.40
   0  20  -8   13.62    6.26
   0 -20  -9   16.91    5.55
   0  20  -9   13.72    5.62
   0  20 -10   11.08    4.44
   0 -21   0    0.27    6.13
   0  21   0   -1.48    7.16
   0  21   0    2.24    7.62
   0 -21  -1    5.54    6.56
   0 -21   1   10.02    6.33
   0  21   1    6.87    7.53
   0  21  -1    5.97    7.47
   0  21   1   16.96    8.27
   0  21  -1   15.63    8.76
   0 -21   2   65.35   10.46
   0 -21  -2   64.62   10.68
   0  21   2   67.30   11.35
   0  21  -2   84.90   12.04
   0  21   2   67.65   10.69
   0  21  -2   76.29   12.60
   0 -21  -3    6.29    6.80
   0 -21   3   19.14    6.70
   0  21   3   13.37    7.72
   0  21  -3   11.61    6.96
   0  21   3   11.42    6.02
   0  21  -3   14.69    8.69
   0 -21  -4   72.50   10.74
   0 -21   4   70.47    9.44
   0 -21  -4   66.25   10.07
   0  21  -4   67.63   10.31
   0  21  -4   75.58   12.04
   0  21  -5   69.81    9.96
   0 -21  -5   88.39   10.73
   0  21  -5   86.68   12.04
   0  21   6  260.62   17.40
   0  21  -6  243.88   16.86
   0 -21  -6  253.78   17.68
   0  21  -6  272.79   18.48
   0 -21  -7  162.94   12.78
   0  21   7  136.25   11.17
   0  21  -7  131.19   11.01
   0  21  -7  162.88   13.31
   0  21  -8  109.09   10.12
   0 -22   0    0.24    5.05
   0  22   0    3.06    5.92
   0  22   0    1.58    5.75
   0 -22   1  415.44   23.01
   0 -22  -1  416.43   23.42
   0  22   1  432.25   24.64
   0  22  -1  428.43   24.49
   0  22  -1  431.80   24.87
   0  22   1  384.04   22.82
   0 -22   2   27.58    6.76
   0 -22  -2   21.36    6.32
   0  22   2   19.84    6.52
   0  22  -2   26.46    7.41
   0  22  -2   30.38    8.02
   0  22   3  293.34   18.84
   0 -22  -3  280.90   18.06
   0  22  -3  294.47   18.71
   0 -22  -4   16.05    5.21
   0  22  -4   20.13    5.64
   0  22   4   20.68    5.82
   0 -22  -5   68.69    7.79
   0  22   5   48.54    6.82
   0  22  -5   53.97    7.09
   0  22  -5   68.45    8.27
   0  22  -6    5.45    4.01
   0  23   0    2.06    3.54
   1   0 -21   93.84    9.64
   1   0 -20    2.34    6.37
   1   0 -20    1.21    7.87
   1   0 -20   -7.87    6.46
   1   0 -19  244.13   21.83
   1   0 -19  249.84   21.31
   1   0 -19  249.02   22.43
   1   0 -19  248.62   21.98
   1   0 -19  268.12   22.79
   1   0 -18    1.51    9.23
   1   0 -18   -1.46    9.36
   1   0 -18   -8.52   14.10
   1   0 -18  -11.86   10.78
   1   0 -18   -7.00    9.91
   1   0 -18   -9.05   11.25
   1   0 -17  263.30   26.26
   1   0 -17  289.23   27.94
   1   0 -17  228.59   24.33
   1   0 -17  282.73   26.34
   1   0 -17  261.35   24.57
   1   0 -17  317.88   28.34
   1   0 -16   -3.73   10.60
   1   0 -16    6.05    9.54
   1   0 -16   -2.11   10.80
   1   0 -16   -5.02   10.41
   1   0 -16   -4.68   10.07
   1   0 -16   -0.37   11.25
   1   0 -15  195.71   22.47
   1   0 -15  224.95   23.93
   1   0 -15  190.06   22.12
   1   0 -15  196.23   22.04
   1   0 -14    0.38    8.84
   1   0 -14    1.79    9.10
   1   0 -14   -1.96    9.02
   1   0 -14   -2.46    7.69
   1   0 -14   41.92   11.55
   1   0 -14    0.92   21.23
   1   0 -13 1298.33   63.27
   1   0 -13 1233.19   62.07
   1   0 -13 1239.92   59.79
   1   0 -13 1345.90   63.63
   1   0 -13 1119.95   60.52
   1   0 -13 1394.31   64.16
   1   0 -13 1402.93  108.98
   1   0 -12    3.10    6.31
   1   0 -12    4.28    6.74
   1   0 -12   -3.40    7.24
   1   0 -12    0.79    6.89
   1   0 -12   -3.98    7.66
   1   0 -12   -5.21   18.72
   1   0 -11 1168.09   88.07
   1   0 -11 1163.02   89.11
   1   0 -10   -8.53   14.96
   1   0 -10   -6.85   15.98
   1   0  -9 1085.51   67.95
   1   0  -9 1200.59   79.25
   1   0  -9 1236.17   80.90
   1   0  -8   -3.14   10.13
   1   0  -8    6.85   14.08
   1   0  -8   -0.49   14.31
   1   0  -7  523.56   43.78
   1   0  -7  467.68   37.64
   1   0  -7  565.26   55.11
   1   0  -7  523.93   45.45
   1   0  -6    0.28    9.39
   1   0  -6   -4.64   18.46
   1   0  -6   -0.87   10.62
   1   0  -6    8.00   13.13
  -1   0   6    0.10    3.67
   1   0  -5  930.58   53.14
   1   0  -5  952.88   50.88
   1   0  -5 1007.83   64.16
   1   0  -5  936.43   55.42
  -1   0   5  940.16   40.09
   1   0  -4    5.98    8.84
   1   0  -4    0.52    9.20
   1   0  -4   -3.67   15.26
  -1   0   4    4.41    4.53
   1   0  -3 2748.77  110.62
   1   0  -3 2569.68  100.26
   1   0  -3 2600.86  100.52
  -1   0   3 2612.87   93.93
   1   0  -2   -1.08    4.61
   1   0  -2   -0.27    5.64
  -1   0   2    4.90    3.71
   1   0  -1  362.82   16.70
  -1   0   1  362.79   18.35
   1   0   0   -0.11    2.52
  -1   0   0    0.84    3.35
  -1   0  -1  676.14   27.42
  -1   0  -1  697.53   30.18
  -1   0  -2   -1.29    4.47
  -1   0  -2   -1.84    4.34
  -1   0  -3    6.39    6.97
  -1   0  -3    1.65    7.41
  -1   0  -4   -0.94    7.81
  -1   0  -4   -5.28    9.01
  -1   0  -5 2315.26  101.59
  -1   0  -5 2369.03   98.98
  -1   0  -6   -0.85   11.60
  -1   0  -6    4.35    9.12
  -1   0  -7 4091.96  159.14
  -1   0  -7 3695.00  163.38
  -1   0  -8    0.99    8.60
  -1   0  -8   -7.28   13.57
  -1   0  -8    8.98   17.97
  -1   0  -9 2016.73  116.00
  -1   0  -9 2672.74  136.11
  -1   0 -10    3.82   16.18
  -1   0 -10   12.10   19.48
  -1   0 -11 1275.18   93.87
  -1   0 -11 1531.37  108.56
  -1   0 -12   -5.49    8.66
  -1   0 -12    0.42    6.73
  -1   0 -12   -1.08   18.89
  -1   0 -12   -3.95    6.79
  -1   0 -13  927.14   49.46
  -1   0 -13 1002.92   51.20
  -1   0 -13  905.44   46.32
  -1   0 -13  863.87   49.02
  -1   0 -13  734.19   47.11
  -1   0 -13  804.69   43.66
  -1   0 -13  892.26   46.83
  -1   0 -13 1008.09   91.86
  -1   0 -14    2.94    7.38
  -1   0 -14   -7.46   10.32
  -1   0 -14    2.97    9.74
  -1   0 -14   -1.05    7.34
  -1   0 -14    6.85   19.74
  -1   0 -14    4.93    7.75
  -1   0 -15 1097.52   60.66
  -1   0 -15 1423.92   68.48
  -1   0 -15 1097.29   61.28
  -1   0 -15 1527.72   67.59
  -1   0 -16   10.08    8.19
  -1   0 -16   -5.79    8.60
  -1   0 -16  -12.16   12.93
  -1   0 -16    7.54   10.46
  -1   0 -17    4.59    6.61
  -1   0 -17   22.85   12.89
  -1   0 -17    9.18    7.46
  -1   0 -17   28.38   12.30
  -1   0 -18   -0.14    5.89
  -1   0 -18    3.15    6.45
  -1   0 -18  -10.69   13.38
  -1   0 -18    5.64   11.46
  -1   0 -18   -9.51   11.10
  -1   0 -19   99.75   14.24
  -1   0 -19  111.99   16.75
  -1   0 -19   92.89   15.14
  -1   0 -19   98.78   14.40
  -1   0 -20   -6.58    8.38
  -1   0 -20   -6.66    7.72
  -1   0 -20    0.12    6.30
  -1   0 -21  124.94   12.31
   1   1 -21   93.49   10.04
   1   1 -20   87.14   11.38
   1   1 -20   95.13   12.54
   1   1 -20   70.83   10.89
   1  -1 -20   88.10   11.16
   1  -1 -20   98.24   12.38
   1   1 -20  101.39   12.36
   1  -1 -19   68.32   12.87
   1   1 -19   95.70   13.85
   1  -1 -19   65.53   13.21
   1   1 -19   64.93   13.47
   1   1 -19   47.81   11.32
   1  -1 -19   56.98   12.79
   1  -1 -19   69.95   12.87
   1   1 -19   55.52   12.18
   1  -1 -19   45.05   10.51
   1  -1 -19   80.30   14.52
   1   1 -19   78.42   13.73
   1   1 -18  390.40   30.03
   1  -1 -18  393.85   30.40
   1   1 -18  375.37   29.43
   1   1 -18  361.25   28.03
   1  -1 -18  352.94   28.77
   1   1 -18  343.68   29.14
   1   1 -18  441.43   31.76
   1  -1 -18  361.46   28.69
   1  -1 -18  357.44   29.51
   1  -1 -18  368.27   27.44
   1  -1 -18  431.53   31.07
   1   1 -18  426.86   30.94
   1  -1 -17  149.54   20.37
   1   1 -17  137.23   19.13
   1   1 -17  173.74   21.45
   1  -1 -17  166.77   20.41
   1  -1 -17  152.17   18.66
   1   1 -17  140.95   18.76
   1  -1 -17  140.14   20.30
   1  -1 -17  156.04   19.78
   1   1 -17  151.76   19.80
   1   1 -17  154.29   21.09
   1   1 -17  170.00   21.77
   1  -1 -17  169.70   21.32
   1   1 -16  880.34   51.56
   1  -1 -16  831.48   50.50
   1  -1 -16  718.42   47.41
   1  -1 -16  864.73   51.56
   1  -1 -16  834.93   48.18
   1  -1 -16  837.24   49.12
   1   1 -16  877.68   50.92
   1   1 -16  893.27   50.08
   1   1 -16  916.08   51.87
   1   1 -16 1049.57   54.98
   1  -1 -16  955.97   52.57
   1  -1 -15  496.83   35.77
   1   1 -15  463.17   34.81
   1   1 -15  507.94   36.64
   1   1 -15  474.96   32.94
   1  -1 -15  511.29   35.84
   1  -1 -15  450.29   33.06
   1   1 -15  476.25   34.81
   1  -1 -15  446.54   33.44
   1  -1 -15  454.57   34.83
   1   1 -15  490.38   35.16
   1   1 -14  427.08   31.69
   1  -1 -14  449.93   32.39
   1   1 -14  435.16   32.68
   1   1 -14  379.42   28.65
   1  -1 -14  431.27   31.94
   1   1 -14  379.69   30.60
   1  -1 -14  388.64   30.28
   1  -1 -13   61.16   12.33
   1   1 -13   49.92   11.78
   1   1 -13   59.35   12.16
   1  -1 -13   47.66   11.70
   1   1 -13   67.23   25.10
   1  -1 -13   64.80   12.68
   1   1 -13   53.37   11.89
   1   1 -13   47.20   11.83
   1  -1 -13   44.33   10.29
   1  -1 -13   56.29   11.77
   1   1 -13   46.70   11.43
   1   1 -13   20.05   19.04
   1  -1 -13   44.50   23.77
   1  -1 -12  104.11   14.18
   1  -1 -12   88.34   14.41
   1   1 -12  105.22   14.78
   1   1 -12  103.96   14.67
   1   1 -12  120.12   29.86
   1   1 -12  101.72   13.65
   1  -1 -12   93.53   13.05
   1  -1 -12  111.65   14.88
   1   1 -12  114.69   15.52
   1  -1 -12  105.06   14.20
   1   1 -12  106.50   32.44
   1  -1 -12  103.69   30.30
   1   1 -11   33.12   13.93
   1   1 -11   80.37   25.85
   1  -1 -11   79.84   26.48
   1   1 -11   82.00   26.15
   1   1 -10  109.41   25.11
   1   1 -10   81.16   18.77
   1  -1 -10   95.81   26.64
   1   1 -10   75.16   23.30
   1  -1  -9   -7.42   14.39
   1   1  -9   19.83   12.67
   1   1  -9   -1.51   14.94
   1  -1  -9   13.91   16.95
   1   1  -9   -0.06   15.21
   1  -1  -8   32.39   23.28
   1  -1  -8   37.64   18.52
   1   1  -8   34.57   13.55
   1   1  -8   42.10   18.46
   1  -1  -8   40.59   14.20
   1  -1  -8   44.33   18.09
   1   1  -8   50.08   19.74
   1  -1  -7  145.47   31.95
   1   1  -7  106.83   20.92
   1  -1  -7  127.18   22.58
   1   1  -7  145.43   20.69
   1  -1  -7  119.64   19.72
   1  -1  -7  135.91   24.67
   1   1  -7  132.68   24.23
  -1   1   7  117.79   13.84
   1   1  -6  187.50   24.41
   1  -1  -6  193.13   24.44
   1  -1  -6  170.44   16.81
   1   1  -6  162.34   20.44
   1  -1  -6  168.80   21.31
   1  -1  -6  172.34   30.23
   1  -1  -6  157.04   24.18
   1   1  -6  183.09   25.63
   1  -1  -5   81.01   14.94
   1  -1  -5   98.95   12.76
   1   1  -5   67.38   13.85
   1  -1  -5   94.68   23.90
   1  -1  -5  108.82   18.62
   1  -1  -5  100.17   24.34
   1   1  -5   90.96   20.95
   1  -1  -5   82.68   17.58
   1   1  -5   66.28   17.15
   1  -1  -4  939.35   49.72
   1  -1  -4  965.89   45.45
   1  -1  -4 1014.22   50.08
   1   1  -4 1005.90   58.33
   1  -1  -4  972.38   59.86
   1   1  -4  958.33   47.54
   1  -1  -4  953.63   59.08
   1   1  -4  734.03   51.84
  -1  -1   4  948.29   35.30
   1   1  -4  952.03   52.27
   1  -1  -3 4821.23  172.23
   1  -1  -3 4946.93  171.85
   1   1  -3 5166.93  180.34
   1  -1  -3 5052.28  182.97
   1   1  -3 4713.24  168.83
  -1  -1   3 4842.79  160.00
   1   1  -3 4980.27  173.90
   1  -1  -3 4502.44  173.54
  -1  -1   2 2441.83   83.77
   1   1  -2 2573.20   95.14
   1   1  -2 2306.24   88.60
   1  -1  -2 2549.90   98.27
  -1  -1   2 2392.97   84.74
   1  -1  -2 2327.79   90.99
   1   1  -2 2305.67   93.28
   1  -1  -1  190.27   13.64
  -1  -1   1  183.96   12.43
   1   1  -1  188.99   13.11
   1  -1  -1  193.28   15.37
  -1   1   1  184.74   10.64
   1   1  -1  176.68   13.35
  -1  -1   1  194.75   12.36
  -1   1   1  205.03   15.41
  -1  -1   0 2700.44   98.47
  -1   1   0 2686.88   97.41
  -1  -1   0 2698.08   96.63
  -1  -1  -1 2517.06   93.70
  -1   1  -1 2446.17   88.99
  -1  -1  -2 2491.35   96.82
  -1  -1  -2 2428.80   94.02
  -1   1  -2 2546.50   95.59
  -1   1  -2 2492.95   89.98
  -1  -1  -3   13.81    9.47
  -1  -1  -3    6.09    8.25
  -1  -1  -3    3.70    9.15
  -1   1  -3   12.24   10.36
  -1   1  -3    2.32    4.67
  -1  -1  -4 1552.10   71.99
  -1   1  -4 1567.05   59.39
  -1  -1  -4 1611.43   72.47
  -1  -1  -4 1455.62   74.09
  -1   1  -4 1559.29   77.02
  -1   1  -4 1639.46   63.44
  -1   1  -5  541.57   34.12
  -1  -1  -5  475.80   37.32
  -1   1  -5  566.29   28.67
  -1  -1  -5  597.13   39.37
  -1   1  -5  551.61   44.54
  -1   1  -6    7.82    7.88
  -1   1  -6    9.08   10.64
  -1  -1  -6    0.74    9.76
  -1   1  -6   22.44    7.55
  -1  -1  -6   17.54   12.11
  -1   1  -7   56.23   17.04
  -1   1  -7   54.60   10.36
  -1  -1  -7   68.09   17.77
  -1  -1  -7   86.74   16.91
  -1   1  -7   61.75   14.15
  -1  -1  -8   -5.46   10.92
  -1   1  -8    9.46    9.34
  -1  -1  -8    5.66   13.10
  -1   1  -8    0.92   13.55
  -1  -1  -8    1.79   16.70
  -1   1  -8   29.06   20.48
  -1   1  -9   11.30   14.62
  -1  -1  -9   27.34   12.23
  -1  -1  -9    8.67   15.06
  -1  -1  -9   22.58   20.89
  -1   1  -9   22.29   19.77
  -1   1 -10    1.18   14.64
  -1   1 -10   18.42   16.13
  -1  -1 -10   18.10   16.82
  -1   1 -11   -6.57   15.79
  -1  -1 -11   -3.30   17.51
  -1   1 -11  -21.23   19.88
  -1   1 -12  207.75   20.61
  -1  -1 -12  190.23   19.89
  -1   1 -12  126.11   30.02
  -1  -1 -12  181.84   19.35
  -1   1 -12  175.93   19.02
  -1  -1 -12  182.90   19.23
  -1  -1 -12  167.45   17.08
  -1  -1 -12  257.58   45.38
  -1   1 -12  213.97   41.98
  -1   1 -12  180.71   18.31
  -1   1 -12  150.98   16.01
  -1   1 -13  268.77   23.92
  -1  -1 -13  273.91   24.23
  -1  -1 -13  263.02   24.09
  -1   1 -13  282.66   46.39
  -1   1 -13  249.91   21.70
  -1   1 -13  297.07   25.88
  -1   1 -13  257.73   24.50
  -1  -1 -13  270.00   24.62
  -1  -1 -13  245.86   23.75
  -1   1 -13  267.93   23.28
  -1  -1 -13  245.63   21.83
  -1   1 -13  241.75   21.19
  -1   1 -13  240.54   46.77
  -1  -1 -13  261.41   48.19
  -1  -1 -13  277.96   21.70
  -1   1 -14  422.13   33.05
  -1  -1 -14  616.10   38.45
  -1  -1 -14  605.92   38.30
  -1   1 -14  567.62   37.70
  -1   1 -14  561.05   34.73
  -1  -1 -14  710.84   44.73
  -1   1 -14  545.79   38.15
  -1  -1 -14  541.14   37.42
  -1  -1 -14  599.21   38.86
  -1   1 -14  652.90   76.29
  -1  -1 -14  523.50   33.96
  -1   1 -14  465.54   32.05
  -1  -1 -14  539.50   70.72
  -1   1 -14  544.34   35.53
  -1   1 -15  121.73   17.15
  -1  -1 -15  154.90   19.39
  -1   1 -15  162.74   21.27
  -1  -1 -15  140.09   19.45
  -1   1 -15  122.56   17.09
  -1  -1 -15  153.51   19.54
  -1  -1 -15  138.72   27.72
  -1  -1 -15  149.25   19.87
  -1   1 -15  151.29   19.45
  -1   1 -16  313.22   27.20
  -1  -1 -16  319.14   27.86
  -1  -1 -16  307.40   27.84
  -1   1 -16  285.07   26.63
  -1  -1 -16  390.01   32.24
  -1   1 -16  410.99   33.76
  -1   1 -16  438.28   31.78
  -1  -1 -16  387.24   30.62
  -1  -1 -17  194.74   20.55
  -1   1 -17  164.09   18.97
  -1  -1 -17  184.06   20.45
  -1   1 -17  237.26   25.51
  -1   1 -17  171.38   19.52
  -1  -1 -17  221.39   24.17
  -1  -1 -17  208.72   22.68
  -1   1 -17  225.75   22.82
  -1   1 -18  161.15   17.36
  -1  -1 -18  121.90   16.08
  -1   1 -18  153.38   19.10
  -1  -1 -18  158.37   20.37
  -1  -1 -18  109.88   15.54
  -1  -1 -18  155.84   19.40
  -1   1 -18  155.68   17.50
  -1   1 -18  163.83   21.21
  -1   1 -18  139.50   17.59
  -1  -1 -18  163.47   19.12
  -1  -1 -19  152.06   16.32
  -1  -1 -19  129.55   16.39
  -1   1 -19  162.48   18.34
  -1   1 -19  152.29   18.39
  -1   1 -19  127.28   14.49
  -1  -1 -19  143.56   17.96
  -1   1 -19  137.63   16.44
  -1   1 -19  133.55   15.82
  -1  -1 -19  161.25   17.84
  -1   1 -20   75.81   11.38
  -1  -1 -20   94.31   13.03
  -1  -1 -20   76.91   10.59
  -1   1 -20   90.08   13.00
  -1  -1 -20   99.08   13.05
  -1  -1 -20   85.81   12.04
  -1   1 -20   89.10   11.51
  -1   1 -21   26.07    6.75
  -1   1 -21   15.05    5.67
  -1  -1 -21   18.75    6.22
   1   2 -21  101.66   10.50
   1   2 -20   40.34    8.18
   1  -2 -20   27.02    7.55
   1   2 -20   37.87    8.32
   1  -2 -20   35.36    7.42
   1   2 -20   44.47    9.32
   1   2 -20   31.19    9.07
   1  -2 -19    1.17    8.33
   1   2 -19    2.56    7.34
   1  -2 -19    3.02    8.20
   1  -2 -19   -1.17    9.22
   1  -2 -19   -6.34    7.52
   1   2 -19   -6.24    9.71
   1  -2 -19    5.59    8.00
   1   2 -19    9.34   10.82
   1   2 -19   -0.13    7.54
   1  -2 -19   10.31    9.46
   1   2 -18   47.24   12.73
   1  -2 -18   28.83   11.75
   1   2 -18   38.52   14.33
   1   2 -18   29.53   11.12
   1  -2 -18   42.01   10.84
   1  -2 -18   37.49   12.10
   1  -2 -18   37.14   11.54
   1  -2 -18   37.04   12.81
   1   2 -18   19.07   11.68
   1  -2 -18   35.90   13.01
   1   2 -18   35.92   11.83
   1  -2 -17   11.39   10.70
   1   2 -17    2.00    9.23
   1  -2 -17   -3.32    9.61
   1   2 -17    3.01    9.94
   1  -2 -17   -2.17    8.78
   1  -2 -17   -3.57   10.92
   1   2 -17   13.56   11.84
   1  -2 -17    2.11   10.25
   1   2 -17    3.47   10.96
   1   2 -17  -14.58   13.31
   1   2 -17   -1.65   11.06
   1  -2 -17    0.82   11.40
   1   2 -16    4.27    9.34
   1  -2 -16   27.08   12.78
   1  -2 -16   -0.73    7.09
   1   2 -16   -0.56   12.46
   1   2 -16   14.89   10.95
   1  -2 -16   11.93    9.36
   1  -2 -16   13.39    8.88
   1  -2 -16   14.36   10.73
   1  -2 -16   28.90   13.32
   1   2 -16   14.75   11.04
   1  -2 -16   23.43   13.02
   1   2 -16   12.61   11.92
   1   2 -16   14.81    9.57
   1   2 -15  159.31   20.01
   1  -2 -15  166.12   20.82
   1   2 -15  173.07   19.63
   1   2 -15  170.97   21.15
   1  -2 -15  193.16   21.68
   1  -2 -15  164.16   20.98
   1  -2 -15  147.49   18.94
   1  -2 -15  168.01   19.38
   1   2 -15  159.38   20.65
   1   2 -15  180.20   22.18
   1  -2 -15  139.96   18.64
   1   2 -14  122.53   17.56
   1  -2 -14  124.63   17.84
   1   2 -14  124.05   16.49
   1   2 -14  110.22   17.47
   1   2 -14  123.74   36.95
   1  -2 -14  137.11   19.47
   1   2 -14  122.55   18.13
   1  -2 -14  125.17   17.19
   1   2 -14  133.07   18.63
   1  -2 -14  119.99   17.39
   1  -2 -14  104.49   16.01
   1  -2 -14  147.70   37.90
   1   2 -13  295.75   25.63
   1  -2 -13  320.25   26.57
   1  -2 -13  304.94   26.79
   1   2 -13  360.63   27.76
   1   2 -13  306.97   49.08
   1   2 -13  322.33   25.65
   1  -2 -13  318.20   26.13
   1   2 -13  303.23   26.40
   1  -2 -13  318.51   26.02
   1   2 -13  352.67   53.05
   1  -2 -13  387.49   54.00
   1  -2 -12  111.87   15.44
   1   2 -12  122.06   15.62
   1  -2 -12  124.57   16.78
   1   2 -12  120.51   14.72
   1   2 -12  128.66   32.65
   1   2 -12  122.18   16.00
   1  -2 -12  107.76   14.56
   1   2 -12  101.17   14.96
   1  -2 -12  136.82   17.40
   1  -2 -12  139.12   16.22
   1   2 -12  114.85   31.68
   1  -2 -12  113.46   29.76
   1   2 -11  752.94   61.47
   1   2 -11  987.06   79.93
   1  -2 -11  986.39   79.28
   1   2 -11 1061.58   82.30
   1   2 -10  651.88   52.70
   1   2 -10  714.16   64.06
   1   2 -10  738.57   64.28
   1  -2 -10  750.30   64.72
   1  -2  -9  795.17   75.67
   1   2  -9  753.14   54.27
   1   2  -9  745.08   62.15
   1  -2  -9  755.72   62.35
   1   2  -9  753.65   61.31
   1  -2  -8  881.18   75.50
   1   2  -8  912.24   57.98
   1   2  -8  890.45   65.05
   1  -2  -8  918.70   65.85
   1   2  -8  935.32   65.43
   1  -2  -7 1518.92   98.85
   1  -2  -7 1556.46   73.68
   1   2  -7 1579.93   79.24
   1   2  -7 1549.17   85.15
   1   2  -7 1486.54   85.09
   1   2  -7 1573.90   98.35
   1  -2  -7 1565.60   86.36
   1  -2  -6   50.66   12.33
   1   2  -6   47.56   13.20
   1  -2  -6   56.11   22.13
   1  -2  -6   52.21   22.68
   1   2  -6   46.10   15.89
   1   2  -6   47.01   20.17
   1  -2  -6   44.27   16.32
   1  -2  -5  170.78   19.30
   1  -2  -5  210.96   31.48
   1   2  -5  174.47   27.54
   1  -2  -5  149.61   22.29
   1   2  -5  198.35   24.32
   1  -2  -4  584.81   37.76
   1   2  -4  650.84   35.53
   1  -2  -4  681.84   49.95
   1   2  -4  619.82   45.35
   1   2  -4  639.86   40.36
   1  -2  -4  623.99   40.56
   1  -2  -3  100.95   15.64
  -1  -2   3   99.32    7.22
   1  -2  -3  116.96   21.25
   1   2  -3  103.32   12.64
   1  -2  -3  106.78   15.30
   1   2  -3   91.58   15.98
  -1  -2   2  691.53   31.29
   1  -2  -2  681.42   38.69
   1  -2  -2  647.30   40.28
   1   2  -2  697.45   32.14
   1  -2  -2  620.92   33.40
   1   2  -2  618.15   37.65
  -1  -2   1   19.19    7.36
  -1   2   1    7.00    5.27
  -1  -2   0   43.19    9.55
  -1   2   0   49.13    8.56
  -1  -2  -1  127.71   16.38
  -1   2  -1  138.40   13.25
  -1  -2  -2  221.12   21.41
  -1  -2  -2  228.14   18.01
  -1  -2  -2  234.97   20.20
  -1   2  -2  213.34   15.54
  -1  -2  -3  787.21   42.66
  -1  -2  -3  711.73   42.81
  -1   2  -3  778.01   44.22
  -1   2  -3  678.75   32.14
  -1  -2  -4  841.00   50.72
  -1  -2  -4  816.00   48.95
  -1  -2  -4  819.01   50.87
  -1   2  -4  801.42   51.12
  -1   2  -4  801.93   36.42
  -1  -2  -5   16.33   15.20
  -1  -2  -5   17.17   11.49
  -1  -2  -5    7.79   13.34
  -1   2  -5   20.92   17.05
  -1   2  -5   17.88    5.85
  -1   2  -6  315.72   23.15
  -1  -2  -6  443.74   36.98
  -1   2  -6  376.90   28.50
  -1  -2  -6  417.01   41.43
  -1  -2  -6  380.74   39.63
  -1   2  -6  413.24   42.55
  -1   2  -7  952.12   50.43
  -1  -2  -7  972.64   59.70
  -1   2  -7  919.87   69.69
  -1   2  -7 1021.20   65.57
  -1   2  -8  818.98   60.41
  -1  -2  -8  876.54   58.12
  -1   2  -9  606.13   55.24
  -1  -2  -9  605.34   49.70
  -1   2  -9  719.71   62.94
  -1  -2  -9  529.05   55.06
  -1   2 -10 1197.05   87.41
  -1   2 -10 1434.22   97.90
  -1  -2 -10 1348.37   95.44
  -1   2 -11  279.64   42.24
  -1  -2 -11  298.65   45.22
  -1   2 -11  336.46   48.60
  -1  -2 -12  419.13   29.61
  -1   2 -12  396.27   28.79
  -1  -2 -12  379.44   27.82
  -1   2 -12  335.88   48.91
  -1   2 -12  386.76   26.61
  -1  -2 -12  326.15   29.25
  -1  -2 -12  364.57   27.78
  -1   2 -12  352.43   28.02
  -1  -2 -12  389.99   29.11
  -1  -2 -12  352.28   51.53
  -1   2 -12  392.31   28.36
  -1   2 -12  360.93   26.14
  -1   2 -12  370.26   53.29
  -1  -2 -12  336.06   25.37
  -1   2 -13  620.97   37.99
  -1  -2 -13  637.56   39.23
  -1   2 -13  627.48   69.66
  -1   2 -13  587.49   35.80
  -1  -2 -13  573.48   37.06
  -1   2 -13  660.57   39.36
  -1  -2 -13  611.43   39.31
  -1  -2 -13  452.41   38.24
  -1  -2 -13  568.92   37.72
  -1   2 -13  554.69   38.01
  -1  -2 -13  578.48   35.59
  -1   2 -13  555.20   34.85
  -1   2 -13  607.09   37.92
  -1  -2 -13  637.83   71.41
  -1   2 -13  676.81   73.35
  -1  -2 -14  329.69   27.92
  -1   2 -14  248.33   24.20
  -1   2 -14  374.01   29.24
  -1   2 -14  324.12   26.01
  -1  -2 -14  342.70   27.79
  -1   2 -14  295.81   51.02
  -1  -2 -14  331.25   28.22
  -1  -2 -14  333.72   28.43
  -1   2 -14  347.24   29.88
  -1  -2 -14  371.53   37.22
  -1   2 -14  343.92   27.94
  -1   2 -14  414.75   60.19
  -1   2 -14  337.94   25.81
  -1  -2 -14  307.58   53.20
  -1  -2 -15  184.91   21.07
  -1   2 -15  130.27   17.32
  -1  -2 -15  245.21   35.28
  -1   2 -15  138.31   17.87
  -1   2 -15  188.21   22.89
  -1  -2 -15  178.71   21.95
  -1  -2 -15  166.24   20.46
  -1   2 -15  183.29   20.49
  -1  -2 -15  171.59   20.37
  -1   2 -15  192.21   19.99
  -1   2 -16  101.60   15.20
  -1  -2 -16   82.06   14.50
  -1   2 -16   98.62   18.44
  -1  -2 -16   89.47   17.01
  -1  -2 -16   36.79   27.19
  -1  -2 -16   75.29   14.47
  -1   2 -16   89.36   14.41
  -1  -2 -16   97.37   16.61
  -1   2 -16  131.64   18.31
  -1   2 -17  108.07   15.61
  -1  -2 -17   75.72   13.86
  -1  -2 -17  105.11   17.76
  -1   2 -17  119.31   16.22
  -1   2 -17  114.85   19.61
  -1  -2 -17   77.00   14.49
  -1   2 -17  101.68   15.82
  -1  -2 -17  112.14   17.09
  -1   2 -18   30.13   10.48
  -1  -2 -18   25.29   11.32
  -1   2 -18   16.47    7.78
  -1  -2 -18   16.85   10.98
  -1   2 -18    9.80   11.19
  -1   2 -18   29.12   14.96
  -1  -2 -18   16.16    8.72
  -1  -2 -18   24.94   11.67
  -1   2 -18   18.46    9.99
  -1  -2 -19   49.23   12.03
  -1  -2 -19   40.06    9.11
  -1   2 -19   64.05   13.36
  -1   2 -19   53.27   12.36
  -1  -2 -19   51.60   11.95
  -1   2 -19   63.20   11.29
  -1  -2 -19   56.39   12.10
  -1   2 -20   18.64    8.03
  -1   2 -20    8.38    7.11
  -1  -2 -20   19.36    6.08
  -1  -2 -20   11.52    7.15
  -1  -2 -20   16.31    8.17
  -1   2 -20   15.36    7.37
  -1  -2 -20   26.51    8.63
  -1   2 -21   12.55    5.67
  -1   2 -21    4.04    5.04
  -1  -2 -21    9.00    5.46
  -1  -2 -21   11.16    5.83
   1   3 -21  219.50   15.36
   1   3 -20    8.54    5.66
   1   3 -20   14.35    6.16
   1   3 -20   25.96    8.34
   1   3 -20   15.63    7.45
   1  -3 -20   25.90    7.89
   1   3 -19  684.65   38.32
   1  -3 -19  695.21   37.94
   1   3 -19  771.28   40.48
   1   3 -19  748.00   39.95
   1   3 -19  677.10   38.69
   1  -3 -19  668.25   35.45
   1  -3 -19  685.32   38.43
   1  -3 -19  699.55   38.05
   1   3 -18    6.06    9.12
   1  -3 -18   -0.93    9.52
   1  -3 -18   -0.23    9.79
   1   3 -18   -2.18   11.84
   1   3 -18    6.57   11.02
   1  -3 -18    3.20    6.28
   1   3 -18  -16.48    9.78
   1  -3 -18    2.09    8.15
   1  -3 -18   19.65   10.96
   1  -3 -18    4.17    9.82
   1   3 -18    8.93    9.06
   1  -3 -17  717.91   44.02
   1   3 -17  708.29   43.52
   1  -3 -17  616.66   30.50
   1  -3 -17  706.92   42.83
   1  -3 -17  691.23   41.41
   1  -3 -17  588.19   37.78
   1  -3 -17  729.63   44.72
   1   3 -17  790.85   45.54
   1  -3 -17  505.75   42.04
   1   3 -17  750.79   45.54
   1   3 -17  760.01   43.16
   1  -3 -17  695.75   41.66
   1   3 -16   98.53   17.11
   1  -3 -16   88.45   16.92
   1  -3 -16  113.16   18.77
   1   3 -16  119.98   18.90
   1  -3 -16   63.29    9.84
   1   3 -16  133.41   19.87
   1  -3 -16   83.31   15.23
   1   3 -16  109.74   18.24
   1  -3 -16   94.54   15.75
   1  -3 -16   85.70   14.38
   1  -3 -16   84.55   15.75
   1   3 -16  111.87   17.15
   1   3 -16  125.38   17.99
   1   3 -15  939.07   49.65
   1  -3 -15  880.76   48.55
   1  -3 -15  875.32   46.20
   1   3 -15  924.34   47.46
   1   3 -15  955.50   49.17
   1  -3 -15  838.75   46.73
   1   3 -15  880.05   48.95
   1  -3 -15  207.67   35.12
   1  -3 -15  890.97   46.31
   1  -3 -15  355.99   30.73
   1  -3 -15  651.95   41.14
   1   3 -15 1034.81   52.08
   1  -3 -15  851.78   48.50
   1  -3 -14   23.49   10.40
   1   3 -14   15.42    9.57
   1  -3 -14   13.43    8.99
   1   3 -14   15.15   19.68
   1   3 -14   16.21    9.28
   1  -3 -14   16.29    8.39
   1  -3 -14   18.53    9.86
   1   3 -14   20.31   11.52
   1  -3 -14   12.81    9.66
   1   3 -14   17.67    9.94
   1  -3 -14  -30.50    8.60
   1  -3 -14   -3.57   20.34
   1   3 -13  804.63   45.88
   1  -3 -13  894.10   48.69
   1  -3 -13  823.66   48.62
   1   3 -13  942.41   87.35
   1   3 -13  868.14   46.77
   1  -3 -13  830.83   46.05
   1   3 -13  869.29   47.06
   1   3 -13  828.29   48.19
   1  -3 -13  853.26   48.49
   1  -3 -13  823.57   46.55
   1  -3 -13  892.90   82.53
   1  -3 -12   50.23   12.22
   1   3 -12   46.82   11.02
   1  -3 -12   62.53   11.94
   1  -3 -12   42.38   10.15
   1   3 -12   50.43   10.70
   1   3 -12   55.21   11.04
   1   3 -12   75.18   24.53
   1  -3 -12   47.17   10.78
   1  -3 -12   43.48   11.11
   1   3 -12   62.52   13.01
   1  -3 -12   32.51   18.56
   1   3 -12   55.44   24.53
   1   3 -11   12.11   13.02
   1   3 -11   26.41   16.57
   1   3 -11   33.89   20.14
   1  -3 -11    6.95   14.60
   1   3 -10  244.46   38.58
   1  -3 -10  260.50   48.10
   1   3 -10  225.59   31.05
   1  -3 -10  222.10   35.28
   1   3 -10  254.83   37.44
   1  -3  -9  112.33   33.52
   1   3  -9   78.83   19.18
   1   3  -9   91.04   24.68
   1   3  -9   95.53   23.43
   1  -3  -9   58.96   20.96
   1  -3  -8  196.23   24.49
   1  -3  -8  210.11   40.57
   1   3  -8  195.03   25.81
   1  -3  -8  200.42   39.74
   1  -3  -8  173.92   28.52
   1   3  -8  174.44   28.31
   1   3  -8  152.06   34.58
   1  -3  -7   61.18   15.24
   1   3  -7   77.21   16.82
   1  -3  -7   48.10   27.57
   1  -3  -7   53.92   25.62
   1   3  -7   47.37   23.05
   1  -3  -7   44.17   15.72
   1   3  -7   38.23   16.41
   1  -3  -6   49.05   13.93
   1  -3  -6   46.93   22.67
   1  -3  -6   53.87   25.70
   1  -3  -6   35.85   15.30
   1   3  -6   46.10   22.06
   1   3  -6   53.68   16.75
   1  -3  -5 1845.89   87.48
   1  -3  -5 1867.56  103.25
   1   3  -5 1879.33   80.84
   1   3  -5 1876.78   88.17
   1   3  -5 1829.85   98.65
   1  -3  -5 1771.17   87.67
   1  -3  -4  906.42   53.85
   1  -3  -4  997.28   63.61
   1   3  -4  922.19   45.65
   1  -3  -4  850.70   51.02
   1   3  -4  965.56   60.01
   1  -3  -3 4138.21  162.73
  -1  -3   3 4321.45  146.61
   1  -3  -3 4263.50  169.03
   1  -3  -3 3897.26  154.17
   1   3  -3 4428.44  152.84
   1  -3  -2   10.78   10.49
  -1  -3   2   18.22    8.33
   1  -3  -2   -0.74   12.60
   1   3  -2    6.27    7.60
   1  -3  -2   11.99    7.03
  -1  -3   1 9999.00  341.55
   1  -3  -1 9811.94  347.35
  -1   3   1 9901.47  337.68
  -1  -3   0   29.42   11.84
  -1   3   0   41.97   11.02
  -1  -3  -1  292.55   26.36
  -1   3  -1  270.48   22.60
  -1  -3  -2    4.31   10.97
  -1   3  -2    3.91    6.76
  -1  -3  -3 2030.80   91.89
  -1   3  -3 2103.67   92.59
  -1   3  -3 2080.43   78.45
  -1  -3  -4  299.53   30.39
  -1  -3  -4  270.85   28.25
  -1  -3  -4  238.98   29.11
  -1   3  -4  250.78   17.31
  -1   3  -4  271.96   30.99
  -1  -3  -5 1604.44   83.67
  -1  -3  -5 1654.28   85.60
  -1  -3  -5 1499.05   85.99
  -1   3  -5 1595.60   63.03
  -1   3  -5 1658.26   89.09
  -1  -3  -6   13.79   13.61
  -1  -3  -6   17.96   15.54
  -1  -3  -6    6.16   15.80
  -1   3  -6    2.13   11.25
  -1   3  -6   19.24   18.11
  -1   3  -7  389.50   30.00
  -1  -3  -7  417.92   40.60
  -1  -3  -7  429.69   45.77
  -1   3  -7  286.81   24.69
  -1  -3  -7  316.92   41.10
  -1   3  -7  412.81   38.96
  -1   3  -7  341.96   44.13
  -1   3  -8    3.64    6.47
  -1  -3  -8  -12.02   14.73
  -1   3  -8   -9.06   22.49
  -1   3  -8   -7.86   15.75
  -1  -3  -9   -7.26   12.30
  -1   3  -9   -4.97   15.93
  -1  -3  -9   -5.48   18.30
  -1   3  -9    5.54   14.56
  -1   3 -10   -8.00   16.97
  -1  -3 -10   -2.57   15.25
  -1   3 -10   -0.07   14.29
  -1   3 -11  162.53   33.23
  -1  -3 -11  223.25   38.40
  -1   3 -11  240.79   38.96
  -1  -3 -12   50.78   11.72
  -1   3 -12   37.23    9.05
  -1  -3 -12   40.81   10.29
  -1   3 -12   31.12   12.32
  -1   3 -12   10.97   16.76
  -1  -3 -12   52.03   12.06
  -1   3 -12   47.45   11.89
  -1  -3 -12   34.10    9.78
  -1   3 -12   57.35   24.48
  -1   3 -12   49.88   11.16
  -1   3 -12   42.18   11.57
  -1  -3 -12   52.19   22.88
  -1  -3 -12   36.26    9.32
  -1  -3 -13  391.28   29.73
  -1   3 -13  393.36   28.60
  -1  -3 -13  331.76   26.67
  -1   3 -13  294.07   47.88
  -1   3 -13  357.74   27.58
  -1   3 -13  349.08   26.32
  -1  -3 -13  359.11   29.36
  -1  -3 -13  191.51   30.77
  -1  -3 -13  353.47   28.30
  -1   3 -13  366.33   29.96
  -1   3 -13  334.97   26.52
  -1   3 -13  341.58   28.05
  -1  -3 -13  314.20   49.76
  -1   3 -13  366.50   52.23
  -1  -3 -13  314.47   24.98
  -1  -3 -14   21.41   10.02
  -1   3 -14    9.74    7.10
  -1   3 -14   26.24    9.98
  -1   3 -14   12.84    8.49
  -1  -3 -14   14.29    9.78
  -1   3 -14   14.51   18.00
  -1  -3 -14    8.33    8.22
  -1   3 -14   15.26   10.45
  -1  -3 -14   18.35   10.22
  -1  -3 -14   34.46   29.40
  -1   3 -14   27.23   26.41
  -1  -3 -14   17.60   24.03
  -1   3 -14   25.81   10.15
  -1   3 -14   15.98    9.88
  -1   3 -15  751.59   46.77
  -1  -3 -15  740.90   47.68
  -1  -3 -15 1121.15   63.44
  -1  -3 -15  725.84   47.78
  -1  -3 -15  919.17   51.85
  -1   3 -15  947.29   53.96
  -1   3 -15  901.07   47.93
  -1  -3 -15  941.58   49.53
  -1   3 -15  993.20   50.49
  -1  -3 -16    2.02    8.55
  -1   3 -16    3.72    7.12
  -1   3 -16   11.76   12.93
  -1  -3 -16    3.53   10.73
  -1   3 -16    5.53    9.59
  -1  -3 -16   -2.36    8.75
  -1  -3 -16    0.86   10.04
  -1   3 -16    2.81    7.30
  -1   3 -16   -8.01    8.83
  -1   3 -17  496.04   32.69
  -1  -3 -17  447.92   34.61
  -1   3 -17  502.32   37.04
  -1   3 -17  491.09   32.98
  -1  -3 -17  463.72   34.01
  -1   3 -17  454.81   31.62
  -1  -3 -17  440.45   32.42
  -1  -3 -18   12.69    7.24
  -1  -3 -18  -11.06   10.32
  -1   3 -18   -8.15   10.95
  -1  -3 -18   -1.05    9.87
  -1  -3 -18    6.18    9.98
  -1   3 -18    0.97    7.87
  -1  -3 -19  380.16   26.62
  -1   3 -19  421.21   27.56
  -1  -3 -19  377.61   27.87
  -1  -3 -19  353.55   23.39
  -1   3 -19  406.04   28.36
  -1  -3 -19  384.49   27.16
  -1   3 -19  358.64   24.18
  -1   3 -20   -0.31    6.29
  -1  -3 -20    5.10    6.88
  -1  -3 -20    5.57    7.04
  -1   3 -20   12.55    6.78
  -1  -3 -20   -2.89    6.58
  -1   3 -21  372.03   21.10
  -1  -3 -21  368.09   20.25
  -1   3 -21  357.76   19.81
  -1  -3 -21  387.19   21.19
   1   4 -21    6.22    4.90
   1   4 -20   13.70    6.11
   1   4 -20   20.47    7.91
   1   4 -20   17.01    6.12
   1  -4 -20   18.55    6.66
   1   4 -19    1.55    6.26
   1   4 -19    8.56    8.88
   1   4 -19   -6.11    6.59
   1  -4 -19    7.41    7.53
   1  -4 -19   10.58    7.86
   1   4 -19   -2.46    9.59
   1  -4 -19    4.15    7.60
   1   4 -18   13.71    9.38
   1   4 -18   16.72   10.69
   1   4 -18   19.42    9.15
   1  -4 -18   14.15    9.99
   1  -4 -18   27.69   11.68
   1  -4 -18   11.19    8.38
   1   4 -18    6.16   11.49
   1  -4 -18   20.60   10.17
   1   4 -17   28.41   11.49
   1  -4 -17   25.89   12.79
   1  -4 -17   42.77   10.67
   1  -4 -17   31.83   32.64
   1  -4 -17   24.66   11.67
   1  -4 -17   26.19   13.01
   1   4 -17   25.65   12.88
   1  -4 -17   25.69   10.76
   1   4 -17   12.13   12.39
   1   4 -17   32.98   12.25
   1  -4 -17   31.98   12.08
   1   4 -17   33.89   11.15
   1  -4 -16    1.58   10.35
   1   4 -16   -0.81    9.30
   1   4 -16   -6.77   13.02
   1  -4 -16    3.64   10.41
   1  -4 -16   -0.95   10.16
   1   4 -16  -10.49   12.26
   1  -4 -16   -8.53    8.06
   1  -4 -16   10.07   11.73
   1   4 -16   -3.06    9.40
   1  -4 -16    1.58    9.33
   1   4 -16   -1.58    8.69
   1   4 -15    6.95    9.83
   1  -4 -15   -2.58   10.49
   1   4 -15   -0.51    9.24
   1  -4 -15   18.59   10.18
   1   4 -15    9.23    9.05
   1  -4 -15    4.92    7.15
   1   4 -15   31.45   13.70
   1  -4 -15   11.17    9.86
   1  -4 -15   11.33    8.32
   1   4 -15    1.71   12.95
   1  -4 -15   18.68   11.77
   1  -4 -15    5.11    6.77
   1  -4 -14  139.05   18.98
   1  -4 -14  127.26   16.96
   1   4 -14  164.01   19.54
   1   4 -14  139.93   17.36
   1   4 -14  124.91   36.24
   1   4 -14  166.51   20.49
   1  -4 -14  147.51   18.26
   1  -4 -14   49.94   10.28
   1   4 -14  160.89   20.58
   1  -4 -14   98.93   14.42
   1  -4 -14  133.53   17.43
   1  -4 -14  160.25   19.93
   1  -4 -14   97.96   29.47
   1  -4 -13  100.71   15.72
   1  -4 -13   99.08   16.23
   1   4 -13  106.82   15.30
   1   4 -13  152.02   35.46
   1   4 -13   87.49   13.80
   1  -4 -13   99.33   14.04
   1   4 -13  119.47   17.45
   1  -4 -13  105.88   16.96
   1  -4 -13   49.47    9.35
   1  -4 -13   88.02   14.10
   1  -4 -13   86.84   13.71
   1  -4 -13   93.30   14.48
   1   4 -13  101.24   16.16
   1  -4 -13   94.17   29.96
   1  -4 -12  304.71   26.21
   1  -4 -12  286.99   24.56
   1   4 -12  259.20   45.52
   1   4 -12  290.41   23.61
   1   4 -12  256.00   21.99
   1  -4 -12  268.61   22.42
   1  -4 -12  272.01   24.54
   1   4 -12  291.27   25.26
   1  -4 -12  256.29   22.84
   1  -4 -12  281.88   43.91
   1   4 -11   84.91   20.83
   1   4 -11   96.63   28.80
   1  -4 -11  113.71   37.31
   1  -4 -11   83.85   23.25
   1   4 -10 1231.42   79.73
   1  -4 -10 1281.28  106.77
   1   4 -10 1353.79   95.04
   1  -4 -10 1299.39   90.00
   1   4 -10 1336.87   88.87
   1  -4  -9    1.30   18.21
   1   4  -9   12.90   11.36
   1  -4  -9   31.18   15.68
   1   4  -9   12.70   12.71
   1   4  -9   13.12   23.16
   1  -4  -8  460.87   43.63
   1  -4  -8  709.72   70.63
   1   4  -8  652.29   48.79
   1  -4  -8  659.51   69.06
   1   4  -8  685.01   68.50
   1   4  -8  704.06   54.99
   1  -4  -8  639.18   53.92
   1  -4  -7 1128.29   68.80
   1  -4  -7 1218.52   90.41
   1  -4  -7 1209.09   90.26
   1   4  -7 1141.33   71.66
   1  -4  -7 1067.91   69.80
   1   4  -7 1088.77   84.40
   1  -4  -6 2158.38  101.26
   1  -4  -6 2052.24  117.72
   1  -4  -6 2020.03   98.78
   1   4  -6 2083.14  115.43
   1   4  -6 2241.12  100.75
   1  -4  -5  902.41   58.63
   1   4  -5  904.13   47.91
   1  -4  -5  915.78   69.53
   1   4  -5  888.99   65.94
   1  -4  -5  906.30   55.60
   1  -4  -4 3708.82  158.80
   1  -4  -4 3980.97  169.61
   1   4  -4 3967.04  144.07
   1  -4  -4 3639.64  149.28
   1   4  -4 3768.98  164.75
  -1  -4   3 2430.46   97.11
   1  -4  -3 2408.47  111.98
   1  -4  -3 2541.10  116.87
   1  -4  -3 2350.52   98.96
   1   4  -3 2570.12  102.45
  -1  -4   2   67.94   13.65
   1  -4  -2   55.60   17.90
   1   4  -2   54.31   12.68
   1  -4  -2   61.78   10.15
  -1  -4   1   33.28   13.35
   1  -4  -1   47.79   18.48
  -1   4   1   55.28   13.44
  -1  -4   0   45.26   15.59
  -1   4   0   48.53   13.55
  -1  -4  -1  221.33   26.98
  -1   4  -1  215.74   23.20
  -1  -4  -2  173.92   26.05
  -1   4  -2  177.96   21.71
  -1  -4  -3  590.16   45.65
  -1  -4  -3  619.17   45.18
  -1   4  -3  593.52   34.14
  -1  -4  -4   45.52   17.08
  -1   4  -4   37.75    4.36
  -1  -4  -4   28.76   16.65
  -1   4  -4   42.18    8.63
  -1   4  -4   41.13   10.03
  -1   4  -4   40.19   17.43
  -1  -4  -5  136.14   24.22
  -1  -4  -5  144.65   26.40
  -1  -4  -5  148.77   28.68
  -1   4  -5  150.46   18.74
  -1   4  -5  142.48   13.29
  -1   4  -5  148.72   28.28
  -1  -4  -6  647.79   52.74
  -1  -4  -6  678.12   54.97
  -1  -4  -6  555.88   54.58
  -1   4  -6  629.04   57.62
  -1   4  -6  665.68   31.46
  -1   4  -6  625.78   44.54
  -1  -4  -7  608.18   51.97
  -1  -4  -7  552.43   52.51
  -1  -4  -7  507.75   54.01
  -1   4  -7  537.81   43.73
  -1   4  -7  583.29   58.76
  -1   4  -8 1431.46   70.32
  -1  -4  -8 1467.03   89.71
  -1  -4  -8 1318.25   91.94
  -1  -4  -8 1326.25   96.51
  -1   4  -8 1291.98   97.65
  -1   4  -8 1469.64   83.63
  -1  -4  -9   23.93   14.29
  -1   4  -9   28.86   22.21
  -1  -4  -9   32.99   18.96
  -1   4  -9   43.50   17.37
  -1   4 -10  745.01   68.60
  -1  -4 -10  745.52   62.88
  -1   4 -10  878.83   67.57
  -1  -4 -10  691.31   65.55
  -1   4 -11  154.26   33.75
  -1  -4 -11  155.64   32.81
  -1   4 -11  173.85   32.48
  -1  -4 -12  268.85   24.69
  -1   4 -12  256.33   21.87
  -1   4 -12  240.05   20.97
  -1   4 -12  294.66   47.60
  -1  -4 -12  252.71   22.16
  -1  -4 -12  272.14   25.20
  -1   4 -12  246.44   23.87
  -1  -4 -12  254.76   23.10
  -1   4 -12  266.42   23.68
  -1   4 -12  277.36   44.91
  -1   4 -12  325.74   26.68
  -1  -4 -12  266.22   44.95
  -1   4 -13  250.56   22.93
  -1  -4 -13  239.07   23.59
  -1   4 -13  223.44   21.22
  -1   4 -13  305.64   50.14
  -1  -4 -13  223.51   21.34
  -1   4 -13  200.09   19.96
  -1  -4 -13  242.39   23.95
  -1  -4 -13  207.47   21.91
  -1   4 -13  257.85   25.26
  -1   4 -13  231.72   41.12
  -1   4 -13  272.84   25.10
  -1   4 -13  259.07   23.67
  -1  -4 -13  223.56   41.26
  -1   4 -14  265.03   24.73
  -1  -4 -14  326.18   28.36
  -1  -4 -14  324.07   26.19
  -1   4 -14  343.84   27.02
  -1   4 -14  333.22   54.02
  -1   4 -14  308.26   25.03
  -1  -4 -14  330.95   28.65
  -1  -4 -14  311.36   39.79
  -1  -4 -14  315.84   28.44
  -1   4 -14  335.84   30.84
  -1   4 -14  301.00   49.97
  -1  -4 -14  318.36   51.85
  -1   4 -14  336.07   27.57
  -1   4 -14  346.40   29.55
  -1   4 -15   26.11    9.30
  -1  -4 -15   51.12   13.19
  -1  -4 -15   34.64   11.73
  -1   4 -15   44.19   15.11
  -1  -4 -15   41.01   11.99
  -1   4 -15   45.46   12.51
  -1  -4 -15   32.27   11.07
  -1   4 -15   48.35   11.54
  -1   4 -16   40.31   11.38
  -1   4 -16   32.57   10.47
  -1  -4 -16   36.52   13.10
  -1  -4 -16   52.35   13.58
  -1  -4 -16   58.62   38.01
  -1   4 -16   54.47   16.26
  -1   4 -16   32.16   10.09
  -1  -4 -16   44.78   12.98
  -1   4 -16   49.82   11.47
  -1   4 -17   27.68    8.50
  -1  -4 -17   21.68   11.08
  -1  -4 -17   19.45   11.17
  -1   4 -17   48.77   11.26
  -1   4 -17   22.61   10.94
  -1  -4 -17   17.07    7.61
  -1  -4 -17   38.98   12.73
  -1   4 -17   16.28    8.50
  -1  -4 -18   76.19   13.80
  -1   4 -18   84.75   14.51
  -1  -4 -18   79.11   15.09
  -1   4 -18   71.39   11.68
  -1  -4 -18   82.03   14.08
  -1  -4 -19    1.53    7.81
  -1  -4 -19   -3.12    7.98
  -1   4 -19    0.70    7.72
  -1   4 -19  -10.78   10.25
  -1  -4 -19   -2.07    7.81
  -1   4 -19   12.12    6.44
  -1  -4 -20   68.76   11.10
  -1   4 -20   56.99    9.16
  -1  -4 -20   64.12    9.92
  -1   4 -20   64.58   10.82
  -1  -4 -20   59.34   10.14
  -1   4 -21   28.68    6.44
   1   5 -20  176.29   13.73
   1  -5 -20  171.50   14.08
   1   5 -20  195.24   16.48
   1   5 -20  148.28   13.06
   1   5 -19  161.57   15.85
   1   5 -19  165.96   16.08
   1   5 -19  162.77   17.86
   1  -5 -19  181.27   16.78
   1   5 -19  135.43   14.86
   1  -5 -19  170.72   16.25
   1  -5 -19  147.27   15.52
   1   5 -18  617.72   36.90
   1  -5 -18  558.14   34.49
   1  -5 -18  588.86   36.37
   1  -5 -18  760.07   47.16
   1   5 -18  584.85   36.44
   1   5 -18  710.30   41.42
   1   5 -18  661.83   37.36
   1  -5 -18  538.99   34.25
   1   5 -17  303.99   27.35
   1  -5 -17  307.68   28.80
   1   5 -17  318.33   27.49
   1   5 -17  305.89   29.67
   1  -5 -17  289.51   25.71
   1  -5 -17  267.52   25.76
   1   5 -17  303.33   26.97
   1  -5 -17  287.34   25.28
   1   5 -16  598.79   38.99
   1  -5 -16  568.15   39.05
   1  -5 -16  503.07   38.11
   1  -5 -16  538.55   37.03
   1  -5 -16  539.57   27.81
   1  -5 -16  517.16   35.58
   1   5 -16  618.11   39.51
   1   5 -16  694.68   43.78
   1   5 -16  591.00   38.25
   1  -5 -16  488.45   34.53
   1   5 -16  546.02   34.83
   1  -5 -15  340.16   29.50
   1   5 -15  397.66   30.43
   1  -5 -15  373.37   28.14
   1   5 -15  361.85   27.47
   1  -5 -15  251.90   19.81
   1   5 -15  423.28   31.82
   1  -5 -15  320.51   26.86
   1  -5 -15  279.09   25.97
   1  -5 -15  369.82   31.31
   1  -5 -14  151.19   19.65
   1   5 -14  176.83   20.40
   1   5 -14  190.27   44.65
   1  -5 -14  114.67   16.33
   1   5 -14  127.91   15.99
   1  -5 -14  124.05   16.85
   1  -5 -14   65.61   11.50
   1   5 -14  140.92   19.41
   1  -5 -14  146.30   18.19
   1  -5 -14  145.22   19.58
   1  -5 -14  121.40   34.49
   1  -5 -13  133.85   17.81
   1   5 -13  153.59   38.00
   1   5 -13  133.20   17.57
   1   5 -13  126.72   15.32
   1  -5 -13  138.94   16.78
   1  -5 -13   39.93   10.25
   1   5 -13  142.28   19.03
   1   5 -13  144.72   18.14
   1  -5 -13  169.36   18.93
   1  -5 -13  146.54   17.55
   1  -5 -13  129.04   17.82
   1  -5 -13  142.93   33.18
   1  -5 -12  436.23   31.99
   1  -5 -12  419.42   30.64
   1   5 -12  426.30   29.57
   1   5 -12  415.92   27.68
   1  -5 -12  388.51   27.79
   1   5 -12  456.07   60.60
   1  -5 -12  418.57   30.93
   1   5 -12  437.24   29.72
   1  -5 -12  425.25   29.88
   1  -5 -12  252.24   21.22
   1  -5 -12  411.25   28.08
   1   5 -12  422.70   31.40
   1  -5 -12  348.60   49.88
   1  -5 -11   30.12   10.03
   1  -5 -11   34.35    9.99
   1   5 -11   16.90    7.61
   1   5 -11   19.09   11.97
   1  -5 -11   19.30    7.63
   1   5 -11   42.47   21.16
   1  -5 -11   19.93   26.16
   1   5 -11   30.70   10.92
   1  -5 -11   23.08    9.45
   1  -5 -11   25.68   17.08
   1   5 -10  185.96   36.57
   1   5 -10  220.27   31.72
   1  -5 -10  212.30   47.87
   1  -5 -10  192.63   33.92
   1   5 -10  205.56   45.22
   1  -5  -9   16.90   25.18
   1   5  -9   16.16   11.22
   1  -5  -9   24.07   14.08
   1  -5  -9    7.74   21.99
   1  -5  -9   30.95   17.07
   1   5  -9   15.72   24.80
   1  -5  -8   -2.08    9.97
   1  -5  -8   -4.12   22.60
   1  -5  -8   -5.00   21.74
   1   5  -8    5.52   21.60
   1  -5  -8    1.82   12.22
   1  -5  -7   33.42   16.17
   1   5  -7   39.04   11.93
   1  -5  -7   58.58   30.19
   1  -5  -7   39.34   15.02
   1   5  -7   74.30   29.86
   1  -5  -6  209.31   29.98
   1   5  -6  181.87   20.88
   1  -5  -6  204.30   40.18
   1   5  -6  198.45   37.77
   1  -5  -6  185.85   26.18
   1  -5  -5  263.73   32.31
   1   5  -5  182.19   19.99
   1  -5  -5  223.18   37.97
   1  -5  -5  264.73   28.02
   1   5  -5  228.09   36.26
   1  -5  -4 1424.24   84.74
   1  -5  -4 1597.44   94.53
   1  -5  -4 1392.69   71.50
   1   5  -4 1551.04   90.60
   1   5  -4 1569.44   75.18
   1  -5  -3 3258.97  144.74
  -1  -5   3 3152.67  126.96
   1  -5  -3 3371.07  148.05
   1   5  -3 3301.65  131.44
   1  -5  -3 2962.32  121.97
   1  -5  -2 1007.54   67.30
  -1  -5   2 1056.02   57.93
   1   5  -2 1160.63   59.54
   1  -5  -2 1012.13   46.28
  -1  -5   1  884.97   54.62
   1  -5  -1  877.42   59.60
  -1   5   1  926.68   52.91
  -1  -5   0   87.51   21.31
   1  -5   0  127.64   24.82
  -1   5   0  101.55   19.46
  -1  -5  -1 3269.67  145.63
  -1   5  -1 3481.34  139.24
  -1  -5  -2  603.82   48.95
  -1   5  -2  594.86   24.55
  -1   5  -2  638.61   44.47
  -1  -5  -3  660.84   52.99
  -1   5  -3  712.07   35.25
  -1   5  -3  726.69   41.99
  -1  -5  -4 1088.49   71.83
  -1  -5  -4 1123.84   73.68
  -1   5  -4 1198.47   75.51
  -1   5  -4 1197.69   56.36
  -1   5  -4 1154.42   55.76
  -1  -5  -5  254.32   34.71
  -1  -5  -5  279.57   37.68
  -1   5  -5  274.45   25.06
  -1   5  -5  302.27   39.53
  -1   5  -5  282.57   21.50
  -1  -5  -6  237.73   33.64
  -1  -5  -6  287.51   37.34
  -1  -5  -6  264.20   39.16
  -1   5  -6  249.94   27.03
  -1   5  -6  282.68   41.07
  -1  -5  -7  664.31   58.99
  -1  -5  -7  653.37   58.87
  -1  -5  -7  718.82   68.05
  -1   5  -7  699.18   66.78
  -1   5  -7  663.56   48.10
  -1  -5  -8   50.00   20.17
  -1  -5  -8   34.89   21.16
  -1  -5  -8   73.45   26.80
  -1  -5  -8   37.91   19.41
  -1   5  -8   22.35   22.02
  -1   5  -8   72.29   17.73
  -1  -5  -9  119.16   29.37
  -1  -5  -9   47.29   18.84
  -1  -5  -9   68.49   30.31
  -1  -5  -9   87.80   23.73
  -1   5  -9   95.44   21.29
  -1   5  -9   66.25   28.26
  -1  -5 -10   -3.39   14.50
  -1   5 -10    9.66   15.66
  -1   5 -10   -1.84   12.15
  -1  -5 -10   19.38   18.20
  -1   5 -10    4.19   22.60
  -1  -5 -11   51.06   11.96
  -1  -5 -11   60.50   11.09
  -1   5 -11   26.87   17.90
  -1  -5 -11   39.74   10.11
  -1   5 -11   47.08   11.95
  -1  -5 -11   54.15   11.58
  -1  -5 -11   47.09   11.68
  -1   5 -11   56.43   21.47
  -1   5 -11   57.48   12.42
  -1  -5 -11   56.00   24.41
  -1   5 -11   54.99   11.70
  -1  -5 -12  219.71   22.94
  -1   5 -12  210.16   20.06
  -1   5 -12  186.07   18.20
  -1   5 -12  228.34   43.98
  -1  -5 -12  200.06   19.79
  -1   5 -12  218.82   22.78
  -1  -5 -12  222.87   23.44
  -1  -5 -12  194.27   20.79
  -1  -5 -12  298.41   17.62
  -1   5 -12  240.12   23.68
  -1   5 -12  203.29   36.24
  -1   5 -12  217.66   21.95
  -1  -5 -12  219.65   40.67
  -1  -5 -13  707.41   43.06
  -1   5 -13  664.48   74.59
  -1  -5 -13  603.88   37.58
  -1   5 -13  641.52   36.30
  -1   5 -13  665.33   38.81
  -1  -5 -13  694.92   41.64
  -1   5 -13  691.00   43.20
  -1  -5 -13  643.05   42.10
  -1  -5 -13  529.75   28.53
  -1  -5 -13  464.00   41.67
  -1   5 -13  733.68   43.84
  -1   5 -13  713.44   42.28
  -1  -5 -13  661.50   70.93
  -1   5 -13  649.61   65.90
  -1   5 -14  227.82   23.50
  -1  -5 -14  279.09   27.25
  -1  -5 -14  267.39   24.64
  -1   5 -14  286.74   25.54
  -1   5 -14  276.26   23.83
  -1  -5 -14  333.86   29.76
  -1   5 -14  269.51   28.43
  -1  -5 -14  267.52   26.55
  -1   5 -14  300.17   27.81
  -1   5 -15  463.50   32.34
  -1   5 -15  482.97   37.52
  -1  -5 -15  552.83   53.18
  -1  -5 -15  471.19   34.97
  -1   5 -15  382.68   29.91
  -1  -5 -15  423.24   30.96
  -1   5 -15  455.61   30.09
  -1   5 -16  311.84   25.50
  -1  -5 -16  377.54   50.92
  -1  -5 -16  309.50   28.00
  -1   5 -16  313.30   25.21
  -1  -5 -16  242.18   23.82
  -1   5 -16  281.03   22.81
  -1   5 -17  287.27   24.39
  -1  -5 -17  260.85   23.48
  -1  -5 -17  278.26   26.25
  -1   5 -17  281.58   22.09
  -1  -5 -17  275.07   23.93
  -1  -5 -18  113.14   16.85
  -1   5 -18  122.97   15.61
  -1  -5 -18  101.65   14.66
  -1   5 -18  132.93   13.51
  -1  -5 -18  115.36   16.06
  -1   5 -19  398.07   25.48
  -1  -5 -19  393.96   25.50
  -1   5 -19  436.49   28.51
  -1  -5 -19  413.97   28.34
  -1  -5 -19  422.84   27.09
  -1   5 -20  112.58   11.15
  -1  -5 -20  127.95   11.77
  -1   5 -20  156.58   14.71
  -1  -5 -20  138.33   14.06
  -1  -5 -20  132.82   13.29
   1   6 -20   42.18    8.53
   1   6 -19   -2.27    5.64
   1   6 -19    6.47    8.55
   1  -6 -19    6.54    6.37
   1   6 -19    4.37    5.99
   1  -6 -19    4.70    6.59
   1   6 -18    1.40    7.05
   1   6 -18   10.85   11.01
   1  -6 -18    5.57    7.15
   1  -6 -18    0.22    7.04
   1   6 -18   -5.43    8.00
   1   6 -18    9.89    7.60
   1  -6 -18    7.19    8.32
   1   6 -17   98.17   16.19
   1  -6 -17   50.12   38.37
   1   6 -17  116.76   16.86
   1  -6 -17  102.63   16.20
   1   6 -17  108.28   20.11
   1  -6 -17   88.13   15.91
   1  -6 -17  100.39   15.82
   1   6 -17  110.14   17.47
   1   6 -16   18.61   10.01
   1  -6 -16    9.60    8.97
   1  -6 -16   -0.58   10.30
   1   6 -16   23.54   13.91
   1   6 -16   11.34   10.18
   1   6 -16   15.73   10.63
   1  -6 -16   27.51   11.12
   1  -6 -15  105.57   18.03
   1   6 -15  132.53   21.44
   1  -6 -15  101.03   18.17
   1  -6 -15   83.48   14.30
   1  -6 -15   93.00   15.49
   1   6 -15   98.24   16.33
   1  -6 -15  110.74   16.12
   1   6 -15   91.63   16.99
   1   6 -15  115.74   15.33
   1  -6 -14   17.95   10.65
   1   6 -14   23.94    8.89
   1  -6 -14   28.84   10.37
   1   6 -14   18.36   10.38
   1   6 -14   25.52   10.15
   1  -6 -14   27.78   10.77
   1  -6 -14   23.61   10.30
   1  -6 -14   21.28   11.33
   1  -6 -13  699.56   42.39
   1   6 -13  679.06   37.08
   1   6 -13  762.53   82.61
   1   6 -13  748.98   42.31
   1  -6 -13  697.81   38.88
   1  -6 -13  676.53   42.33
   1   6 -13  654.24   38.91
   1  -6 -13  653.30   40.16
   1  -6 -13  540.36   36.02
   1  -6 -13  693.55   72.54
   1  -6 -12   23.17    9.38
   1  -6 -12   30.17    9.53
   1  -6 -12   14.02   20.63
   1   6 -12   47.86   11.34
   1   6 -12   16.15   22.08
   1  -6 -12   24.99    9.84
   1  -6 -12   47.14   12.13
   1  -6 -12   23.96    8.38
   1   6 -12   34.13    9.74
   1  -6 -12   -0.29    7.36
   1  -6 -12   31.72   19.41
   1  -6 -11  978.13   51.10
   1  -6 -11  983.92   50.48
   1   6 -11  912.45   71.68
   1   6 -11 1182.36   94.76
   1  -6 -11  915.61   95.91
   1  -6 -11  918.00   45.92
   1   6 -11 1007.82   48.84
   1  -6 -11  993.04   51.59
   1  -6 -11  908.48   45.48
   1   6 -11  962.06   46.77
   1  -6 -11  927.53   48.04
   1  -6 -11  915.99   77.73
   1   6 -10    4.22   12.54
   1  -6 -10   -4.73   19.85
   1  -6 -10  -10.65   25.10
   1   6 -10   16.41   28.03
   1  -6 -10    9.18   14.08
   1  -6  -9  441.01   61.88
   1  -6  -9  500.81   50.70
   1   6  -9  471.98   46.80
   1  -6  -9  519.67   68.78
   1  -6  -9  474.42   49.79
   1   6  -9  506.86   68.61
   1  -6  -8   -3.67   11.39
   1  -6  -8   10.65   22.65
   1  -6  -8    0.68   23.35
   1   6  -8    1.53   23.52
   1  -6  -8    4.80   11.84
   1  -6  -7 5593.52  230.49
   1   6  -7 5208.99  204.93
   1  -6  -7 5221.53  249.88
   1  -6  -7 5509.72  219.63
   1   6  -7 5274.17  249.10
   1  -6  -6   61.20   21.79
   1   6  -6   27.14   10.06
   1  -6  -6   27.04   26.21
   1   6  -6   48.37   27.02
   1  -6  -6   48.08   15.55
   1  -6  -5 2222.98  113.21
   1  -6  -5 2271.56  124.03
   1   6  -5 1784.96   85.11
   1  -6  -5 1716.20   89.31
   1   6  -5 2168.70  120.59
  -1  -6   4 1111.58   57.25
   1  -6  -4 1062.56   73.04
   1  -6  -4 1047.17   78.24
   1   6  -4 1058.92   61.54
   1  -6  -3  101.22   25.50
  -1  -6   3  102.13   17.86
   1  -6  -3  109.56   29.34
   1  -6  -3  118.75   14.91
   1   6  -3  114.62   20.42
   1  -6  -2   25.64   20.48
  -1  -6   2   29.67   14.45
   1   6  -2   17.10   14.02
   1  -6  -1  424.84   43.73
  -1  -6   1  462.83   40.89
  -1   6   1  410.94   36.81
   1  -6   0   10.20   17.33
  -1  -6   0   13.61   15.76
  -1   6   0    8.61   13.58
  -1  -6  -1  111.90   25.41
  -1   6  -1  107.88   21.90
  -1  -6  -2   79.40   24.09
  -1   6  -2   82.33   20.24
  -1  -6  -3  374.33   42.17
  -1   6  -3  383.53   19.11
  -1   6  -3  420.27   38.44
  -1  -6  -4   22.74   17.82
  -1  -6  -4    7.99   17.92
  -1   6  -4   14.67    7.89
  -1   6  -4   14.96    7.45
  -1  -6  -5 2605.33  132.91
  -1  -6  -5 2502.06  134.41
  -1   6  -5 2590.19  105.69
  -1   6  -5 2691.08  138.57
  -1   6  -5 2509.86  104.26
  -1  -6  -6  251.92   38.98
  -1  -6  -6  238.00   37.03
  -1  -6  -6  278.39   42.40
  -1   6  -6  257.37   25.28
  -1   6  -6  291.86   42.83
  -1  -6  -7 1161.17   83.49
  -1  -6  -7 1187.78   85.69
  -1  -6  -7 1153.19   90.91
  -1   6  -7 1213.29   67.68
  -1   6  -7 1160.50   91.38
  -1  -6  -8   63.06   22.05
  -1  -6  -8   49.62   20.90
  -1  -6  -8   47.59   25.15
  -1   6  -8   71.60   17.21
  -1   6  -8   36.41   24.58
  -1  -6  -8   70.36   21.42
  -1  -6  -9 1754.86  117.32
  -1  -6  -9 2099.45  128.45
  -1  -6  -9 1973.70  135.39
  -1  -6  -9 2057.00  119.41
  -1   6  -9 2157.44  107.70
  -1   6  -9 2153.19  143.19
  -1  -6 -10   -2.27   14.95
  -1   6 -10    3.83   10.80
  -1  -6 -10    6.33   15.44
  -1   6 -10   22.40   27.32
  -1  -6 -11 1911.68   79.49
  -1   6 -11 1739.91   72.01
  -1   6 -11 1845.72  122.51
  -1  -6 -11 1704.74   72.26
  -1  -6 -11 1894.57   75.54
  -1  -6 -11 1062.08   59.89
  -1  -6 -11 1320.16   71.19
  -1  -6 -11 1888.67   80.07
  -1   6 -11 1807.39   77.54
  -1  -6 -11 1756.46   75.46
  -1  -6 -11 1877.01  117.39
  -1   6 -11 1932.32  106.10
  -1   6 -11 2159.11   81.24
  -1   6 -11 2008.81   79.55
  -1  -6 -12   13.09   10.27
  -1   6 -12   11.90    7.93
  -1  -6 -12    9.89    8.15
  -1   6 -12    3.68   18.71
  -1   6 -12   29.27   12.58
  -1  -6 -12   17.01    9.52
  -1  -6 -12   22.24   11.14
  -1  -6 -12   16.90   22.77
  -1   6 -12    9.17    9.26
  -1   6 -12   14.16    9.38
  -1  -6 -13 1258.79   59.06
  -1   6 -13 1464.95  114.54
  -1   6 -13 1430.59   61.97
  -1  -6 -13  892.02   46.14
  -1  -6 -13 1118.80   63.99
  -1  -6 -13 1330.12   63.33
  -1  -6 -13 1267.66  100.95
  -1   6 -13 1555.21   67.28
  -1   6 -13 1592.78   68.17
  -1   6 -14   62.18   13.49
  -1   6 -14   86.91   13.83
  -1  -6 -14   78.55   14.01
  -1   6 -14   89.93   14.81
  -1  -6 -14   78.90   15.30
  -1  -6 -15   66.70   13.61
  -1   6 -15   70.90   13.43
  -1  -6 -15   71.66   44.31
  -1  -6 -15   83.06   15.79
  -1   6 -15   66.94   14.18
  -1  -6 -16    0.71    8.74
  -1  -6 -16   17.51   10.96
  -1   6 -16    1.91    9.14
  -1   6 -16   -3.20    7.49
  -1  -6 -16    6.62    8.73
  -1  -6 -17    6.37    7.71
  -1   6 -17    9.65    8.61
  -1  -6 -17   -1.23   10.34
  -1  -6 -17   16.43    9.23
  -1   6 -17    3.69    6.61
  -1   6 -18    0.71   11.55
  -1  -6 -18    0.05    6.94
  -1  -6 -18   -4.97    9.38
  -1   6 -18   -6.72    7.52
  -1  -6 -18   -0.15    8.35
  -1  -6 -19    8.89    5.89
  -1   6 -19    1.27    5.76
  -1  -6 -19    5.52    7.10
  -1   6 -19   -2.17    8.01
  -1  -6 -19   -1.19    6.32
  -1  -6 -20   11.87    5.85
  -1  -6 -20   -0.68    4.05
  -1   6 -20   -3.03    5.86
  -1  -6 -20    8.22    5.59
   1   7 -20  141.02   12.43
   1   7 -19   51.03    8.51
   1   7 -19   62.33    9.26
   1  -7 -19   58.68    9.34
   1   7 -19   80.29   12.08
   1   7 -18  428.18   27.80
   1   7 -18  466.85   31.02
   1  -7 -18  384.45   27.43
   1   7 -18  440.72   28.70
   1  -7 -18  404.14   26.60
   1   7 -17   38.46   10.41
   1   7 -17   46.18   14.87
   1  -7 -17   23.74   10.00
   1  -7 -17   22.24    8.35
   1   7 -17   50.49   10.62
   1  -7 -17   32.49   10.04
   1   7 -17   34.55   11.25
   1   7 -16  568.13   38.92
   1   7 -16  599.22   39.95
   1  -7 -16  530.78   36.30
   1  -7 -16  528.66   37.86
   1   7 -16  638.40   43.27
   1   7 -16  542.86   35.77
   1  -7 -15   18.91    9.36
   1   7 -15   23.74   11.57
   1   7 -15   30.76   13.31
   1  -7 -15   10.85    8.19
   1   7 -15   21.59    9.43
   1  -7 -15   19.23    9.53
   1   7 -14  294.01   26.62
   1  -7 -14  191.60   20.73
   1   7 -14  283.65   23.80
   1  -7 -14  193.61   20.33
   1  -7 -14  194.48   22.22
   1  -7 -14  268.18   27.01
   1  -7 -13   25.68   11.33
   1  -7 -13    8.78    8.16
   1   7 -13   20.79    9.70
   1   7 -13   51.49   30.20
   1  -7 -13    8.86    6.95
   1  -7 -13   18.57   10.38
   1   7 -13   18.27    8.07
   1  -7 -13   13.75    9.99
   1  -7 -13   34.50   21.59
   1  -7 -12  143.35   18.68
   1   7 -12  120.38   16.64
   1  -7 -12  129.94   41.54
   1  -7 -12  132.47   16.19
   1   7 -12  160.70   37.95
   1  -7 -12  125.83   16.72
   1   7 -12  115.70   14.67
   1  -7 -12  117.33   14.53
   1  -7 -12  112.87   13.44
   1  -7 -12  144.40   19.33
   1  -7 -12  109.20   29.08
   1  -7 -11  337.07   27.99
   1   7 -11  450.54   49.32
   1  -7 -11  391.12   63.61
   1  -7 -11  353.85   25.17
   1   7 -11  344.25   26.37
   1  -7 -11  228.50   19.43
   1  -7 -11  357.54   27.07
   1  -7 -11  369.19   29.49
   1  -7 -11  399.03   49.36
   1   7 -11  333.47   27.02
   1   7 -11  322.81   63.26
   1  -7 -10  301.34   24.73
   1  -7 -10  248.44   51.58
   1  -7 -10  291.49   25.02
   1   7 -10  270.94   22.01
   1   7 -10  327.31   40.74
   1  -7 -10  317.51   56.73
   1  -7 -10  310.53   25.46
   1  -7 -10  166.96   16.09
   1  -7 -10  230.50   37.23
   1   7 -10  296.47   58.03
   1  -7  -9    0.56   20.54
   1  -7  -9    8.81   13.22
   1  -7  -9   -0.12   23.63
   1   7  -9   -3.68   24.03
   1  -7  -9    4.95   12.77
   1  -7  -8  300.83   50.83
   1  -7  -8  189.28   33.28
   1  -7  -8  232.44   47.23
   1   7  -8  297.64   52.46
   1  -7  -8  262.48   34.36
   1  -7  -7  466.85   51.48
   1   7  -7  504.25   38.63
   1  -7  -7  459.57   62.64
   1   7  -7  392.67   56.81
   1  -7  -7  420.84   41.35
   1  -7  -6   18.59   19.54
   1   7  -6    4.99    6.94
   1  -7  -6   16.69   25.59
   1  -7  -6   32.40   12.48
   1   7  -6   12.96   22.87
   1  -7  -5    7.15   18.14
   1  -7  -5    7.39   24.97
   1   7  -5   10.64   25.26
   1  -7  -5    0.32    7.56
   1  -7  -4 2373.47  122.52
   1  -7  -4 2428.02  131.57
   1   7  -4 2412.88  106.93
   1  -7  -3   20.82   21.39
  -1  -7   3    5.53   12.32
   1  -7  -3    7.85   22.60
   1   7  -3   17.07   13.77
   1  -7  -3    8.90    5.46
  -1  -7   2 1194.61   71.93
   1  -7  -2 1086.79   80.09
   1   7  -2 1198.63   71.27
  -1  -7   1 1091.15   71.40
   1  -7  -1 1101.07   78.83
  -1   7   1 1104.39   68.28
   1   7  -1 1105.86   68.44
  -1  -7   0 1484.36   87.88
   1  -7   0 1520.28   91.55
  -1   7   0 1400.76   81.58
  -1  -7  -1   34.66   20.49
  -1   7  -1   35.12   19.44
  -1  -7  -2 1487.45   94.89
  -1   7  -2 1584.08   87.78
  -1  -7  -3   10.70   20.20
  -1   7  -3   21.35   18.35
  -1  -7  -4  747.72   64.15
  -1  -7  -4  771.89   66.37
  -1   7  -4  748.70   48.05
  -1  -7  -5  407.68   48.53
  -1  -7  -5  446.45   52.77
  -1   7  -5  403.51   50.59
  -1   7  -5  405.23   32.16
  -1  -7  -6  792.62   69.57
  -1  -7  -6  806.34   74.39
  -1   7  -6  842.17   75.73
  -1  -7  -7   89.88   25.30
  -1  -7  -7  107.86   30.62
  -1  -7  -7  144.81   34.77
  -1  -7  -7   94.82   22.04
  -1   7  -7  103.92   31.61
  -1  -7  -8   94.80   26.89
  -1  -7  -8   29.16   19.25
  -1  -7  -8   69.01   29.27
  -1  -7  -8   52.00   18.73
  -1   7  -8   49.73   26.50
  -1  -7  -9  234.22   41.12
  -1  -7  -9  207.92   38.09
  -1  -7  -9  301.39   51.44
  -1  -7  -9  244.98   37.37
  -1   7  -9  239.39   49.12
  -1  -7 -10   19.90   25.25
  -1   7 -10    0.12    5.77
  -1  -7 -10   10.07   13.81
  -1  -7 -10    8.18   15.13
  -1  -7 -10   -0.85    7.05
  -1  -7 -10    5.71    6.45
  -1   7 -10   -4.31    7.90
  -1   7 -10  -15.90   25.85
  -1  -7 -10   19.25   15.91
  -1   7 -11    7.23    7.27
  -1  -7 -11   -3.45    7.99
  -1  -7 -11    2.39    6.98
  -1  -7 -11   -3.73    7.27
  -1   7 -11   -3.22   20.66
  -1  -7 -11    9.66   16.75
  -1   7 -11   11.15    9.76
  -1   7 -11    2.42    8.55
  -1   7 -12   52.13   11.81
  -1  -7 -12   45.19   11.65
  -1   7 -12   67.29   27.23
  -1  -7 -12   37.61   11.33
  -1  -7 -12   -6.12   28.62
  -1   7 -12   56.77   13.25
  -1  -7 -12   67.14   25.41
  -1   7 -12   53.10   14.20
  -1   7 -13   15.52   10.46
  -1   7 -13   14.64    8.69
  -1   7 -13   15.91   22.90
  -1  -7 -13   25.11    9.55
  -1  -7 -13   16.05    9.76
  -1   7 -13   36.79   13.64
  -1  -7 -13   17.99   19.23
  -1  -7 -14  516.36   33.46
  -1   7 -14  425.23   31.44
  -1  -7 -14  372.03   47.16
  -1  -7 -14  524.73   36.49
  -1   7 -14  410.81   32.48
  -1  -7 -15    3.54    7.97
  -1   7 -15   -2.67    7.95
  -1  -7 -15   -4.03    7.99
  -1   7 -15   -6.68    9.07
  -1  -7 -15   -1.74    9.53
  -1   7 -15   -3.05    9.09
  -1   7 -16  696.83   39.25
  -1  -7 -16  632.93   38.17
  -1   7 -16  700.50   38.13
  -1  -7 -16  632.55   40.97
  -1   7 -16  646.33   39.31
  -1  -7 -17   69.63   14.20
  -1  -7 -17   48.19    9.72
  -1   7 -17   63.39   11.06
  -1  -7 -17   81.72   13.18
  -1   7 -17   81.42   12.32
  -1  -7 -18  334.18   22.62
  -1   7 -18  372.06   23.37
  -1  -7 -18  376.92   27.53
  -1   7 -18  388.41   27.33
  -1  -7 -18  352.04   25.00
  -1  -7 -19   33.24    6.59
  -1  -7 -19   29.86    8.73
  -1   7 -19   37.98    9.11
  -1  -7 -19   29.80    8.18
  -1   7 -20  265.32   16.88
  -1  -7 -20  250.64   17.12
  -1  -7 -20  218.80   15.16
   1   8 -19    7.13    4.81
   1   8 -19    1.83    6.43
   1  -8 -19    6.33    5.27
   1   8 -19    4.15    4.39
   1   8 -18   24.68    7.73
   1  -8 -18    3.25    5.75
   1   8 -18   12.45    8.99
   1  -8 -18    8.75    6.09
   1   8 -18   18.60    8.37
   1   8 -17    9.99    8.54
   1   8 -17    3.17   10.58
   1  -8 -17    6.40    7.83
   1  -8 -17   16.71    8.08
   1   8 -17   19.97   10.30
   1   8 -16   27.63    9.63
   1   8 -16   25.20   11.48
   1  -8 -16   21.36    8.99
   1   8 -16   15.78   11.18
   1  -8 -16   30.33   11.26
   1  -8 -16   12.51    7.08
   1  -8 -15   88.39   14.95
   1   8 -15   94.95   17.92
   1   8 -15   82.68   16.37
   1  -8 -15   71.22   13.39
   1  -8 -15   76.65   15.27
   1  -8 -14  144.52   19.05
   1   8 -14  188.30   23.33
   1   8 -14  203.34   24.11
   1  -8 -14  134.89   19.63
   1   8 -13  413.02   32.59
   1  -8 -13  361.49   30.08
   1   8 -13  404.34   31.52
   1   8 -12  385.68   60.69
   1   8 -12  458.98   32.12
   1  -8 -12  476.24   73.23
   1  -8 -12  285.64   24.69
   1  -8 -12  434.92   31.43
   1  -8 -12  499.85   26.00
   1   8 -12  290.55   26.97
   1  -8 -12  373.29   52.64
   1  -8 -11  565.31   81.84
   1   8 -11  557.26   35.26
   1  -8 -11  538.69   32.48
   1  -8 -11  506.96   73.88
   1  -8 -11  554.14   35.32
   1  -8 -11  404.54   26.15
   1   8 -11  573.23   83.07
   1  -8 -11  570.87   60.44
   1   8 -11  586.04   37.24
   1  -8 -10  309.36   60.42
   1   8 -10  366.51   26.86
   1  -8 -10  378.16   62.04
   1   8 -10  405.29   48.05
   1  -8 -10  359.64   27.03
   1   8 -10  360.93   25.19
   1  -8 -10  284.98   20.59
   1   8 -10  355.44   28.54
   1   8 -10  306.62   61.93
   1  -8 -10  369.35   46.18
   1  -8  -9 1022.30  100.76
   1   8  -9 1097.21   48.07
   1  -8  -9 1044.98   98.96
   1  -8  -9  870.61   76.88
   1   8  -9 1112.16  106.10
   1  -8  -9 1208.42   78.31
   1  -8  -8 1022.31   85.51
   1  -8  -8 1292.92  111.62
   1   8  -8 1345.80  113.42
   1  -8  -8 1042.57   73.67
   1  -8  -7  671.81   64.56
   1  -8  -7  624.11   75.61
   1  -8  -7  510.20   46.81
   1   8  -7  598.66   71.93
   1  -8  -6  366.61   47.61
   1   8  -6  368.42   33.13
   1  -8  -6  318.60   52.45
   1   8  -6  317.66   52.24
   1  -8  -6  324.30   33.43
   1  -8  -5 1728.11  111.60
   1  -8  -5 1709.70  120.34
   1  -8  -5 1657.99   83.72
   1   8  -5 1788.55  121.01
   1  -8  -4 1462.77   99.63
   1  -8  -4 1542.87  108.25
   1   8  -4 1440.78   84.73
   1  -8  -4 1287.98   66.02
   1  -8  -3  752.59   68.91
  -1  -8   3  638.15   52.32
   1   8  -3  738.94   56.99
   1  -8  -2   19.12   23.61
  -1  -8   2    8.91   13.78
  -1   8   2    4.53   15.65
   1   8  -2   -1.27   15.56
   1  -8  -1   99.19   30.85
  -1  -8   1   88.03   24.25
  -1   8   1   63.21   20.86
   1   8  -1   89.56   24.22
  -1  -8   0   62.35   22.97
  -1   8   0   69.77   23.20
  -1  -8  -1  135.76   31.98
  -1   8  -1  100.27   26.21
  -1  -8  -2    5.00   23.61
  -1   8  -2    5.41   18.72
  -1  -8  -3  439.54   52.80
  -1   8  -3  432.65   45.86
  -1  -8  -4  718.70   66.36
  -1  -8  -4  712.03   67.33
  -1   8  -4  523.52   42.69
  -1  -8  -5   46.67   25.60
  -1  -8  -5   29.46   24.71
  -1   8  -5   50.29   12.49
  -1   8  -5   53.05   27.65
  -1  -8  -6  667.55   65.73
  -1  -8  -6  757.83   73.89
  -1   8  -6  681.32   71.63
  -1  -8  -6  518.96   47.84
  -1  -8  -7 1772.14  113.69
  -1  -8  -7 1284.39   97.38
  -1  -8  -7 1740.53  120.83
  -1  -8  -7 1423.29   90.47
  -1   8  -7 1807.05  124.00
  -1  -8  -8  175.74   35.17
  -1  -8  -8  232.92   41.80
  -1  -8  -8  269.83   49.51
  -1   8  -8  268.06   49.77
  -1  -8  -8  234.75   35.24
  -1  -8  -9  243.09   51.48
  -1  -8  -9  225.33   42.61
  -1  -8  -9  194.77   39.02
  -1  -8  -9  285.59   23.33
  -1   8  -9  299.62   55.25
  -1  -8  -9  314.42   43.31
  -1  -8 -10 1449.10  123.81
  -1  -8 -10 1045.14   97.57
  -1  -8 -10 1608.83   65.86
  -1  -8 -10 1027.23   97.07
  -1   8 -10 1444.67   64.43
  -1  -8 -10 1536.97   68.74
  -1  -8 -10 1428.77   64.88
  -1  -8 -10 1224.43   54.98
  -1  -8 -10 1306.27   66.39
  -1   8 -10 1538.78  129.86
  -1   8 -10 1648.77   69.55
  -1  -8 -10 1577.80  105.10
  -1   8 -10 1500.96   66.04
  -1  -8 -11  677.86   85.50
  -1   8 -11  675.04   39.69
  -1  -8 -11  712.84   40.21
  -1  -8 -11  504.41   39.98
  -1  -8 -11  743.26   43.55
  -1  -8 -11  729.42   41.19
  -1   8 -11  794.05   95.38
  -1   8 -11  705.09   41.86
  -1   8 -11  812.92   45.02
  -1  -8 -11  682.01   69.86
  -1   8 -11  684.83   42.76
  -1   8 -12  254.00   22.48
  -1  -8 -12  209.91   20.45
  -1   8 -12  217.83   46.74
  -1  -8 -12  226.86   23.38
  -1   8 -12  244.80   24.38
  -1  -8 -12  203.10   39.10
  -1   8 -12  203.58   22.60
  -1  -8 -13  455.91   31.69
  -1   8 -13  472.75   32.99
  -1  -8 -13  457.55   34.57
  -1   8 -13  496.94   35.54
  -1   8 -13  526.01   37.10
  -1  -8 -14  150.17   17.37
  -1   8 -14  145.45   17.97
  -1  -8 -14  198.28   22.43
  -1   8 -14  166.39   20.37
  -1  -8 -15  103.43   15.08
  -1   8 -15  103.81   15.11
  -1  -8 -15  115.55   17.94
  -1  -8 -15   96.58   13.60
  -1   8 -15   83.75   14.98
  -1   8 -16  257.15   21.99
  -1  -8 -16  238.87   21.60
  -1  -8 -16  224.27   19.34
  -1  -8 -16  273.33   51.65
  -1  -8 -16  233.87   23.83
  -1   8 -16  250.98   22.78
  -1   8 -17   31.71   10.92
  -1  -8 -17   37.35   11.81
  -1  -8 -17   30.66    9.05
  -1   8 -17   40.86    9.84
  -1  -8 -18    1.00    7.57
  -1   8 -18   -3.63    8.07
  -1  -8 -18   -0.68    6.10
  -1   8 -19    1.92    6.16
  -1  -8 -19   -3.54    6.31
  -1  -8 -19   -0.74    4.44
   1   9 -19  436.54   23.65
   1   9 -18   31.45    7.62
   1  -9 -18   14.14    6.26
   1   9 -18   34.17    9.07
   1   9 -18   26.81    8.45
   1   9 -17  287.25   22.36
   1   9 -17  335.73   25.06
   1  -9 -17  288.10   22.95
   1   9 -17  322.20   24.69
   1  -9 -17  290.03   21.53
   1   9 -16   49.67   11.14
   1  -9 -16   32.76    8.79
   1   9 -16   50.50   13.01
   1   9 -16   37.83   11.23
   1  -9 -16   43.57   10.61
   1   9 -15  471.06   34.05
   1  -9 -15  392.15   29.99
   1   9 -15  498.50   33.23
   1  -9 -14   -3.93    7.05
   1   9 -14   -1.88   10.07
   1   9 -14   -0.31    9.85
   1  -9 -14    3.41    7.73
   1  -9 -13  465.08   34.22
   1   9 -13  633.11   41.82
   1   9 -13  630.88   40.59
   1  -9 -13  467.79   37.04
   1   9 -13  464.58   37.26
   1   9 -12   -3.57   22.21
   1   9 -12   10.51   10.13
   1  -9 -12   27.47   27.43
   1  -9 -12    4.39    7.78
   1  -9 -12    3.96    8.56
   1   9 -12    1.64    8.25
   1  -9 -11   71.58   38.87
   1   9 -11   60.59   13.60
   1  -9 -11   62.20   32.62
   1  -9 -11   58.76   12.95
   1   9 -11   71.63   14.76
   1   9 -11   53.33   37.38
   1  -9 -10   -2.12   26.76
   1   9 -10    4.99    7.35
   1  -9 -10    6.38   24.46
   1  -9 -10   -2.64    7.67
   1   9 -10   -7.84    7.48
   1   9 -10  -13.45   26.83
   1   9 -10   -3.95    8.21
   1  -9  -9  221.68   50.75
   1  -9  -9  186.25   18.91
   1  -9  -9  209.28   48.90
   1  -9  -9  161.41   35.60
   1   9  -9  194.42   18.76
   1  -9  -9  202.37   16.97
   1  -9  -9  219.18   20.73
   1   9  -9  210.80   19.53
   1   9  -9  208.29   52.04
   1   9  -9  243.92   23.56
   1  -9  -8   90.26   29.25
   1  -9  -8  143.02   42.51
   1   9  -8  134.45   42.47
   1  -9  -7  180.82   37.34
   1  -9  -7  213.60   49.98
   1   9  -7  150.81   42.67
   1  -9  -6   58.53   25.36
   1   9  -6   38.24   12.54
   1  -9  -6   65.46   29.97
   1   9  -6   17.99   26.59
   1  -9  -5  314.81   48.47
   1  -9  -5  265.16   52.86
   1   9  -5  318.62   39.36
   1   9  -5  372.85   57.57
   1  -9  -4  -20.56   25.21
   1  -9  -4   23.22   27.67
   1   9  -4   14.36   16.18
  -1  -9   3  548.63   50.71
   1  -9  -3  569.00   63.49
  -1   9   3  516.33   52.16
   1   9  -3  557.01   52.52
  -1  -9   2   79.71   23.14
   1  -9  -2   63.89   25.87
   1   9  -2   94.22   25.30
  -1   9   2  105.01   27.93
  -1  -9   1 3136.24  156.13
   1  -9  -1 3160.81  166.73
  -1   9   1 3066.25  151.45
   1   9  -1 3143.67  152.29
  -1  -9   0  257.48   40.00
   1   9   0  237.39   36.69
  -1   9   0  223.36   36.03
  -1  -9  -1 1844.96  115.43
  -1   9  -1 1863.45  107.80
  -1  -9  -2    8.64   21.69
  -1   9  -2    9.58   18.84
  -1  -9  -3  785.56   73.60
  -1   9  -3  749.58   63.85
  -1  -9  -4  283.85   45.36
  -1  -9  -4  298.78   47.98
  -1   9  -4  238.27   29.41
  -1  -9  -5  996.39   85.64
  -1  -9  -5 1061.35   91.66
  -1   9  -5  999.76   89.72
  -1   9  -5 1034.80   63.44
  -1  -9  -5 1065.72   65.58
  -1  -9  -6   79.12   27.53
  -1  -9  -6   70.43   30.65
  -1  -9  -6   77.92   17.77
  -1   9  -6   39.48   28.40
  -1  -9  -7  190.61   36.56
  -1  -9  -7  171.04   37.55
  -1  -9  -7  109.93   35.05
  -1  -9  -7  165.70   28.05
  -1   9  -7  201.15   45.51
  -1  -9  -8   53.93   27.32
  -1  -9  -8   28.45   19.07
  -1  -9  -8   38.24   25.07
  -1  -9  -8   26.64   13.53
  -1   9  -8   10.87   23.92
  -1  -9  -9   17.54   21.79
  -1  -9  -9   54.15   24.87
  -1  -9  -9   32.90   20.57
  -1  -9  -9   32.82    9.69
  -1  -9  -9   51.39   10.30
  -1   9  -9   36.89    9.71
  -1  -9  -9   50.79   19.47
  -1   9  -9   17.97   24.15
  -1   9  -9   47.32   12.19
  -1  -9 -10   27.01   29.08
  -1  -9 -10   24.91   20.04
  -1   9 -10   35.27    9.62
  -1  -9 -10  -34.82   27.03
  -1  -9 -10   37.46   10.20
  -1  -9 -10   58.40   11.27
  -1   9 -10   37.73    9.56
  -1   9 -10   54.72   40.16
  -1  -9 -10   26.49   14.80
  -1   9 -10   36.52   11.94
  -1   9 -10   44.11   11.47
  -1  -9 -11  284.64   59.14
  -1   9 -11  312.83   25.46
  -1  -9 -11  346.87   25.28
  -1  -9 -11  319.50   27.62
  -1  -9 -11  314.86   25.26
  -1  -9 -11  147.51   29.00
  -1  -9 -11  334.32   48.01
  -1   9 -11  301.86   27.64
  -1   9 -11  330.04   27.29
  -1   9 -11  295.00   63.04
  -1   9 -12   22.84   25.47
  -1   9 -12   28.23    9.21
  -1  -9 -12   24.89    8.29
  -1  -9 -12   36.69   11.76
  -1  -9 -12   51.36   26.63
  -1   9 -12   37.43   12.56
  -1   9 -12   22.52   11.54
  -1  -9 -13  123.62   16.02
  -1   9 -13  130.29   16.74
  -1  -9 -13  144.24   19.18
  -1   9 -13  122.13   18.22
  -1   9 -14   26.55   10.10
  -1  -9 -14   21.35    7.65
  -1  -9 -14   40.33   12.71
  -1   9 -14   26.97   10.82
  -1  -9 -15  273.00   23.26
  -1  -9 -15  338.94   28.99
  -1   9 -15  276.79   25.51
  -1  -9 -16    7.93    6.82
  -1   9 -16   22.72    8.56
  -1  -9 -16   19.44   10.84
  -1   9 -16    3.01    7.53
  -1  -9 -17  640.84   38.33
  -1   9 -17  678.27   37.12
  -1   9 -17  647.43   34.83
  -1  -9 -17  622.07   34.67
  -1   9 -18    0.55    6.71
  -1  -9 -18    4.78    7.16
  -1  -9 -18    0.70    5.07
  -1   9 -19  438.71   23.15
  -1  -9 -19  475.23   25.55
   1  10 -18   25.70    6.34
   1 -10 -18   23.47    6.59
   1  10 -18   33.38    7.48
   1  10 -18   20.48    6.20
   1  10 -18   32.13    7.96
   1  10 -17    1.44    5.49
   1 -10 -17   -1.54    6.08
   1  10 -17    3.93    6.58
   1  10 -17    0.43    7.18
   1  10 -16    7.90    7.31
   1  10 -16   16.28   10.32
   1  10 -16    8.32    7.55
   1 -10 -16    5.33    7.17
   1  10 -15   17.19   11.11
   1 -10 -15   17.88    9.35
   1  10 -15   23.70    9.98
   1  10 -14  252.26   25.52
   1 -10 -14  261.76   24.39
   1  10 -14  261.00   23.12
   1  10 -14  254.79   24.40
   1  10 -13    8.98   11.54
   1 -10 -13   -5.92    9.28
   1  10 -13    7.38    9.40
   1  10 -13   -0.76    9.12
   1  10 -12  122.26   19.48
   1 -10 -12   87.79   16.35
   1  10 -12  121.65   17.12
   1  10 -12   76.64   16.01
   1 -10 -11  -30.70   30.47
   1 -10 -11   -7.38   28.34
   1  10 -11    2.25    8.31
   1 -10 -11    1.25    7.91
   1  10 -11    2.35    7.61
   1  10 -11    9.29    6.69
   1  10 -11   -2.17    9.80
   1  10 -11   -7.93   30.38
   1 -10 -10  939.01  110.02
   1 -10 -10  853.11   98.96
   1  10 -10  933.56   51.91
   1 -10 -10 1105.75   44.15
   1  10 -10  871.74   48.56
   1 -10 -10  965.62   52.61
   1  10 -10  948.04  111.82
   1  10 -10  964.07   54.55
   1 -10  -9  100.69   15.44
   1 -10  -9   80.46   37.55
   1  10  -9  104.45   14.92
   1 -10  -9  121.82   40.37
   1 -10  -9  110.49   15.90
   1  10  -9   86.21   13.68
   1  10  -9   95.58   17.00
   1  10  -9  149.60   43.37
   1 -10  -8  740.82   41.29
   1 -10  -8  754.43   92.26
   1  10  -8  682.97   39.19
   1 -10  -8  722.50   77.53
   1 -10  -8  794.90   42.83
   1 -10  -8  607.60   31.50
   1  10  -8  737.35   39.70
   1  10  -8  883.16   98.72
   1  10  -8  767.01   45.65
   1 -10  -7    7.48   20.44
   1 -10  -7   38.05   32.25
   1  10  -7    1.44   24.90
   1 -10  -6 1001.52   90.67
   1 -10  -6 1023.22  104.36
   1  10  -6 1003.23  100.25
   1 -10  -5   67.03   29.17
   1 -10  -5   53.76   31.94
   1  10  -5   47.88   29.78
   1 -10  -4  600.62   69.22
   1 -10  -4  612.61   75.91
   1  10  -4  599.01   57.66
  -1  10   4  676.58   63.75
   1 -10  -3   46.94   27.38
  -1 -10   3   27.51   16.51
  -1  10   3   61.07   23.18
   1  10  -3   44.82   21.54
  -1 -10   2  666.17   61.49
   1 -10  -2  674.21   70.84
   1  10  -2  589.52   58.45
  -1  10   2  570.57   58.47
  -1 -10   1  288.12   42.70
   1  10  -1  327.24   43.96
  -1  10   1  339.49   44.60
  -1 -10   0  179.21   37.13
  -1  10   0  165.12   32.76
   1  10   0  130.56   30.82
  -1 -10  -1  313.79   47.86
  -1  10  -1  339.07   44.45
  -1 -10  -2   -4.52   21.47
  -1  10  -2    9.15   17.96
  -1 -10  -3   -5.99   23.20
  -1  10  -3    3.38   15.50
  -1 -10  -4 1173.17   94.20
  -1 -10  -4  966.94   90.80
  -1  10  -4  945.32   66.57
  -1 -10  -5    2.33   19.43
  -1 -10  -5    8.82   22.05
  -1  10  -5   21.07   24.75
  -1 -10  -6  406.85   55.75
  -1 -10  -6  437.32   63.74
  -1  10  -6  421.64   63.02
  -1 -10  -7  432.04   55.95
  -1 -10  -7  420.15   59.61
  -1 -10  -7  488.68   31.61
  -1 -10  -7  449.78   66.80
  -1  10  -7  446.01   65.63
  -1  10  -7  429.34   32.45
  -1 -10  -8  961.44   50.06
  -1 -10  -8  947.35   97.70
  -1 -10  -8  936.67   90.69
  -1 -10  -8  827.33   49.05
  -1 -10  -8 1044.99   51.56
  -1  10  -8  881.80   46.08
  -1  10  -8  924.82   52.29
  -1  10  -8  947.10   99.57
  -1 -10  -9   68.37   31.92
  -1 -10  -9  149.04   39.21
  -1 -10  -9   33.34   18.54
  -1 -10  -9  113.77   16.03
  -1 -10  -9   98.94   14.08
  -1  10  -9  100.23   13.89
  -1  10  -9  131.72   18.84
  -1  10  -9  126.60   41.09
  -1 -10 -10  748.25   91.98
  -1 -10 -10  661.40   79.59
  -1  10 -10  668.04   39.21
  -1 -10 -10  625.10   38.33
  -1 -10 -10  599.61   43.15
  -1 -10 -10  735.04   43.48
  -1  10 -10  691.90   39.81
  -1  10 -10  671.77   43.66
  -1  10 -10  653.50   88.85
  -1 -10 -11   -2.77   24.97
  -1  10 -11    2.51    7.32
  -1 -10 -11    5.16    8.35
  -1  10 -11   -1.45   10.82
  -1  10 -11   -4.46   30.11
  -1  10 -11    5.82    7.96
  -1  10 -12  274.52   24.41
  -1 -10 -12  282.47   26.52
  -1  10 -12  263.65   26.49
  -1  10 -13   45.19   11.29
  -1 -10 -13   67.82   11.43
  -1 -10 -13   47.97   13.40
  -1 -10 -13   71.29   42.40
  -1  10 -13   44.65   12.56
  -1 -10 -14  180.09   18.06
  -1  10 -14  188.33   20.12
  -1 -10 -14  185.59   22.27
  -1  10 -14  183.65   21.78
  -1 -10 -15    1.89    6.69
  -1  10 -15    8.96    7.80
  -1 -10 -15    2.31    9.21
  -1  10 -15   12.77    9.66
  -1 -10 -16   63.40   10.28
  -1  10 -16  109.05   13.73
  -1 -10 -16  106.02   15.96
  -1  10 -16  122.05   15.00
  -1  10 -16   69.39   12.13
  -1 -10 -17    8.42    5.43
  -1  10 -17    6.90    5.94
  -1 -10 -17    6.47    7.87
  -1  10 -17    9.47    7.68
  -1  10 -17    4.77    6.33
  -1 -10 -18    3.81    6.03
  -1  10 -18   15.23    6.15
  -1 -10 -18    2.61    4.34
  -1 -10 -19    4.32    4.45
   1  11 -18  171.87   13.80
   1  11 -17  211.83   16.69
   1  11 -17  236.20   16.66
   1 -11 -17  193.11   16.79
   1  11 -16  231.73   19.64
   1  11 -16  270.70   22.60
   1  11 -16  211.53   17.92
   1 -11 -16  216.70   19.35
   1  11 -15  233.68   23.29
   1  11 -15  198.13   18.30
   1 -11 -15  222.36   20.90
   1  11 -14   67.31   15.58
   1 -11 -14   80.60   14.12
   1  11 -14   78.05   12.89
   1  11 -14   58.88   12.85
   1  11 -13  103.18   17.51
   1 -11 -13  109.97   16.50
   1  11 -13  114.46   15.07
   1  11 -13   88.01   15.46
   1 -11 -12  252.65   24.85
   1  11 -12  251.02   25.19
   1  11 -11   66.50   14.62
   1 -11 -11   75.59   14.52
   1  11 -11   41.05   10.02
   1  11 -11   64.28   14.90
   1 -11 -10   -0.35   32.28
   1 -11 -10   23.70   30.50
   1  11 -10   14.64    9.10
   1 -11 -10   -1.71    8.30
   1  11 -10    2.63    6.51
   1  11 -10    0.18   10.83
   1  11 -10    5.73   32.57
   1 -11  -9  188.72   55.11
   1 -11  -9  196.90   21.69
   1 -11  -9  209.39   52.13
   1  11  -9  180.47   20.46
   1 -11  -9  203.80   22.54
   1  11  -9  204.93   21.08
   1  11  -9  116.62   46.72
   1  11  -9  198.19   24.31
   1 -11  -8   47.84   36.06
   1 -11  -8   49.71   11.96
   1  11  -8   72.20   13.50
   1 -11  -8   74.04   13.71
   1  11  -8   72.16   12.90
   1  11  -8   73.42   16.26
   1 -11  -7  227.93   22.33
   1 -11  -7  244.83   56.40
   1 -11  -7  266.18   50.08
   1  11  -7  233.15   23.04
   1  11  -7  242.75   21.96
   1  11  -7  227.07   25.39
   1  11  -7  230.53   52.55
   1 -11  -6   49.54   32.35
   1 -11  -6   87.50   14.01
   1 -11  -6   94.99   33.68
   1  11  -6   88.50   14.56
   1  11  -6   89.32   12.60
  -1  11   6   82.83   27.57
   1  11  -6  120.92   41.63
   1  11  -6   94.68   17.27
   1 -11  -5  147.77   40.11
   1 -11  -5  120.35   42.32
   1  11  -5  135.02   42.40
  -1  11   5  142.83   34.48
   1 -11  -4   39.83   26.62
   1 -11  -4   48.47   35.17
  -1  11   4   24.85   19.65
   1  11  -4   42.62   21.01
   1 -11  -3  881.52   87.94
   1 -11  -3  944.90   95.20
  -1  11   3  848.23   76.40
   1  11  -3  894.10   76.13
  -1 -11   2 1077.96   84.85
   1  11  -2  957.39   80.11
  -1  11   2  994.02   81.88
  -1 -11   1 2160.22  133.15
  -1  11   1 2087.30  127.85
   1  11  -1 2276.10  131.32
  -1 -11   0  501.26   59.83
  -1  11   0  461.23   54.88
   1  11   0  443.67   54.74
  -1 -11  -1  770.47   76.92
   1  11   1  691.83   68.17
  -1  11  -1  708.03   67.83
  -1 -11  -2  794.37   80.10
  -1  11  -2  759.85   70.28
  -1 -11  -3   92.14   33.86
  -1  11  -3  117.59   31.10
  -1 -11  -4  515.37   66.16
  -1 -11  -4  510.23   69.81
  -1  11  -4  476.10   47.93
  -1 -11  -5 1053.28   95.70
  -1 -11  -5 1103.76  104.48
  -1  11  -5 1117.70  103.41
  -1 -11  -6   14.55   21.13
  -1 -11  -6    7.11   22.68
  -1 -11  -6   17.59    8.20
  -1  11  -6   -3.32   21.85
  -1  11  -6   16.58   10.83
  -1 -11  -7  549.73   76.00
  -1 -11  -7  519.88   34.50
  -1  11  -7  584.96   35.92
  -1 -11  -7  472.85   65.39
  -1  11  -7  499.36   31.81
  -1 -11  -7  481.86   35.15
  -1  11  -7  488.15   72.34
  -1  11  -7  523.90   37.10
  -1 -11  -8   40.16   11.90
  -1 -11  -8   39.27   32.99
  -1  11  -8   32.28   10.04
  -1 -11  -8   21.41   23.60
  -1 -11  -8   36.84   11.20
  -1 -11  -8   -5.93   18.35
  -1  11  -8   20.58   31.26
  -1  11  -8   31.98   11.88
  -1  11  -8   32.77    9.51
  -1 -11  -9   94.01   40.57
  -1  11  -9   61.27   12.57
  -1 -11  -9  119.75   36.77
  -1 -11  -9   95.60   15.58
  -1 -11  -9   33.69   20.19
  -1  11  -9   77.44   40.72
  -1  11  -9   80.69   12.89
  -1  11  -9   71.81   15.60
  -1 -11 -10    3.60   33.25
  -1 -11 -10   75.57   34.49
  -1  11 -10   47.69   11.71
  -1 -11 -10   28.87   25.67
  -1 -11 -10   38.42   11.79
  -1 -11 -10   38.89    9.94
  -1  11 -10   40.95   35.46
  -1  11 -10   36.79   13.10
  -1  11 -11    2.98    8.64
  -1 -11 -11    4.89    9.98
  -1  11 -11    3.88   10.78
  -1  11 -12   84.05   14.52
  -1 -11 -12   96.91   17.30
  -1  11 -12   78.14   16.65
  -1  11 -13   79.40   14.10
  -1 -11 -13  120.04   43.74
  -1 -11 -13   86.65   16.39
  -1  11 -13   82.19   16.28
  -1  11 -14   55.69   11.86
  -1 -11 -14   60.71   14.49
  -1  11 -14   65.56   14.28
  -1  11 -15  235.75   20.63
  -1  11 -15  245.69   20.59
  -1 -11 -15  211.88   22.01
  -1  11 -15  220.34   22.10
  -1  11 -16  271.80   20.72
  -1  11 -16  281.53   20.60
  -1 -11 -16  284.51   23.79
  -1  11 -16  254.75   21.56
  -1  11 -17  340.88   21.20
  -1  11 -17  353.37   21.28
  -1 -11 -17  352.67   24.43
  -1  11 -17  301.84   20.97
  -1 -11 -18  178.09   14.95
   1 -12 -17    4.82    4.48
   1  12 -17   -1.67    5.74
   1  12 -16    4.42    5.42
   1  12 -16   -5.14    7.69
   1  12 -15   45.77   12.49
   1 -12 -15   55.12   11.12
   1  12 -15   55.42   11.21
   1  12 -14    1.49   10.48
   1 -12 -14   -3.56    7.86
   1  12 -14    2.06    6.89
   1  12 -13  522.59   36.17
   1 -12 -13  483.84   33.79
   1  12 -13  491.92   34.84
   1  12 -12   36.13   13.90
   1 -12 -12   58.11   12.85
   1  12 -12   38.72   12.26
   1  12 -11  281.92   26.41
   1 -12 -11  221.07   23.21
   1  12 -11  205.57   20.49
   1  12 -11  263.17   27.01
   1  12 -10   21.99   11.25
   1 -12 -10   19.90   10.97
   1  12 -10    9.21    6.91
   1  12 -10   16.84   11.97
   1 -12  -9  219.95   22.77
   1 -12  -9  278.46   66.04
   1  12  -9  219.55   22.16
   1 -12  -9  165.29   48.08
   1  12  -9  219.45   21.50
   1 -12  -9  219.91   23.04
   1  12  -9  225.31   25.60
   1  12  -9  240.44   61.55
   1 -12  -8  242.93   61.39
   1 -12  -8  273.47   25.20
   1  12  -8  297.44   26.00
   1 -12  -8  261.33   24.83
   1  12  -8  262.34   23.12
  -1  12   8  242.23   47.36
   1  12  -8  254.34   27.75
   1  12  -8  295.56   62.38
   1 -12  -7 2171.54  172.32
   1 -12  -7 2107.66   91.67
   1  12  -7 2174.25   93.28
   1  12  -7 2081.93   89.28
   1  12  -7 1972.88  161.99
   1  12  -7 2205.28   98.74
  -1  12   7 1884.79  135.90
   1 -12  -6  113.67   15.72
   1 -12  -6  133.82   42.71
   1  12  -6  111.40   17.13
   1  12  -6  126.93   16.14
   1  12  -6  121.63   19.29
   1  12  -6   98.27   37.52
  -1  12   6  123.74   36.66
   1 -12  -5  328.11   27.10
   1 -12  -5  269.95   61.72
   1  12  -5  398.34   30.45
   1  12  -5  364.15   26.83
  -1  12   5  262.05   47.87
   1  12  -5  355.35   30.87
   1  12  -5  285.08   57.99
   1  12  -4   23.35    9.97
   1 -12  -4    8.52    8.00
   1 -12  -4   18.63   29.72
  -1  12   4  -11.82   21.38
   1  12  -4   12.86    9.74
   1  12  -4  -19.18   19.66
   1 -12  -3    3.10   24.77
  -1  12   3    4.27   18.85
   1  12  -3    1.71   19.09
  -1 -12   2   -2.34   17.54
   1  12  -2   44.87   23.86
  -1  12   2   11.79   19.79
  -1 -12   1  219.31   42.67
   1  12  -1  265.64   43.66
  -1  12   1  265.04   44.98
  -1 -12   0   41.67   26.99
  -1  12   0   28.04   19.54
   1  12   0   32.86   22.16
  -1 -12  -1   14.07   23.47
  -1  12  -1  -11.06   20.17
   1  12   1    2.90   18.19
  -1 -12  -2   37.33   26.97
   1  12   2   13.09   19.65
  -1  12  -2   34.00   23.06
  -1 -12  -3  154.73   38.82
   1  12   3  136.96   36.05
  -1  12  -3  141.16   32.14
  -1  12  -4   27.91   10.48
  -1 -12  -4   45.18   26.61
  -1 -12  -4   10.42   22.68
  -1 -12  -4   21.00    8.78
  -1  12  -4   25.19   10.87
  -1 -12  -5 1042.02  101.05
  -1  12  -5 1336.70   63.06
  -1 -12  -5 1111.72   57.80
  -1 -12  -5 1003.95  105.27
  -1  12  -5 1114.17   59.26
  -1  12  -5 1175.36  110.84
  -1 -12  -6  107.46   35.21
  -1  12  -6  119.73   17.61
  -1 -12  -6   84.15   33.84
  -1 -12  -6  129.53   17.30
  -1  12  -6  107.51   37.68
  -1  12  -6  120.73   18.78
  -1 -12  -7  688.73   88.73
  -1 -12  -7  686.37   42.91
  -1 -12  -7  673.47   80.04
  -1  12  -7  708.26   43.08
  -1 -12  -7  868.80   47.17
  -1  12  -7  718.84   40.15
  -1  12  -7  650.25   85.71
  -1  12  -7  680.20   44.72
  -1 -12  -8   16.78   10.31
  -1 -12  -8   18.03   25.25
  -1 -12  -8   60.94   26.37
  -1  12  -8   20.92    9.18
  -1  12  -8   30.74    9.56
  -1 -12  -8   43.34   19.31
  -1 -12  -8   24.87    9.33
  -1  12  -8   28.76   12.70
  -1  12  -8   22.48   27.23
  -1 -12  -9  420.38   73.53
  -1  12  -9  309.88   26.74
  -1 -12  -9  380.30   63.21
  -1 -12  -9  453.11   33.47
  -1  12  -9  432.35   34.68
  -1  12  -9  479.69   78.30
  -1  12 -10   60.24   12.01
  -1 -12 -10   73.56   30.09
  -1 -12 -10   68.04   14.05
  -1  12 -10   68.17   15.48
  -1  12 -11  480.04   33.07
  -1 -12 -11  449.02   34.83
  -1 -12 -11  436.20   44.20
  -1  12 -11  452.83   36.26
  -1  12 -12   13.04   10.41
  -1 -12 -12    5.23   10.05
  -1  12 -13  569.90   36.14
  -1 -12 -13  611.30   39.92
  -1  12 -13  521.51   38.06
  -1  12 -14   36.28   10.07
  -1 -12 -14   28.07   11.49
  -1  12 -14   31.78   11.21
  -1  12 -15  134.00   15.03
  -1 -12 -15  118.67   16.09
  -1  12 -15  119.17   16.03
  -1  12 -16    3.44    5.99
  -1 -12 -16   15.40    8.07
  -1  12 -16   -5.24    6.29
  -1  12 -17   25.09    6.34
  -1 -12 -17   30.18    8.11
  -1  12 -17   27.15    6.97
  -1 -12 -18   13.56    4.96
   1  13 -17    1.13    4.41
   1  13 -16  421.01   24.12
   1  13 -16  464.24   27.08
   1 -13 -16  420.37   24.79
   1  13 -15    9.45    8.52
   1 -13 -15   16.33    7.23
   1  13 -15   18.76    7.79
   1  13 -14  168.23   19.39
   1 -13 -14  164.41   18.00
   1  13 -14  177.86   18.81
   1  13 -13   11.10   10.92
   1 -13 -13    2.09    8.17
   1  13 -13    3.32    8.96
   1  13 -12  272.91   25.77
   1 -13 -12  248.09   24.03
   1  13 -12  243.44   24.99
   1  13 -11   -0.30   10.31
   1 -13 -11   -1.70    8.91
   1  13 -11    1.37    6.16
   1  13 -11   10.05   11.52
   1  13 -10   63.60   14.72
   1 -13 -10   52.98   12.13
   1  13 -10   68.70   12.61
   1  13 -10   80.81   18.27
   1 -13  -9   -2.01    9.25
   1  13  -9    3.65    8.08
   1 -13  -9    4.26    8.56
   1  13  -9   -0.24    7.65
   1  13  -9   -0.07   11.64
   1 -13  -8  116.48   17.20
   1 -13  -8  124.37   52.13
   1  13  -8  111.68   17.74
   1 -13  -8  109.26   16.75
   1  13  -8  117.92   16.08
  -1  13   8   60.82   34.91
   1  13  -8   99.30   19.78
   1  13  -8   70.87   41.15
   1 -13  -7   20.49   30.97
   1 -13  -7   15.03    9.66
   1  13  -7   29.44   12.42
   1  13  -7   18.47    8.51
  -1  13   7   26.00   19.95
   1  13  -7   25.10   13.79
   1  13  -7   36.56   35.03
   1 -13  -6    2.70    7.72
   1 -13  -6   -3.91   30.85
   1  13  -6    0.71    9.15
   1  13  -6   13.40    9.38
   1  13  -6    9.84   11.58
   1  13  -6   39.45   32.68
  -1  13   6    9.13   17.96
   1 -13  -5   -1.13    7.49
   1 -13  -5  -16.77   31.35
  -1  13   5   24.13   11.64
   1  13  -5    5.73    9.17
   1  13  -5    4.25    7.39
  -1  13   5    0.33   19.53
   1  13  -5   -3.85   10.98
   1  13  -5   29.86   30.57
  -1  13   4  645.31   42.22
   1  13  -4  714.39   43.56
   1 -13  -4  655.66   40.83
   1 -13  -4  669.22   90.81
  -1  13   4  488.52   66.31
   1  13  -4  712.12   45.17
   1  13  -4  615.86   68.88
  -1  13   3   45.03   12.14
   1  13  -3   47.02   12.08
   1 -13  -3   52.40   12.44
  -1 -13   3   60.09   12.68
   1 -13  -3   65.83   35.36
   1  13  -3   52.91   13.89
   1  13  -3   11.02   21.82
  -1  13   3   12.37   20.41
  -1  13   2 1061.45   56.65
   1  13  -2 1113.01   57.06
  -1 -13   2 1070.08   54.44
   1 -13  -2 1082.33   56.25
   1  13  -2 1117.95   58.23
   1  13  -2 1018.60   90.65
  -1  13   2 1104.39   95.86
  -1  13   1   23.75   10.68
  -1 -13   1   10.32   18.23
   1  13  -1   21.68    9.31
   1 -13  -1   38.58   10.89
  -1 -13   1   19.10    8.75
   1  13  -1   53.30   25.94
   1  13  -1   25.57   10.77
  -1  13   1    7.59   19.01
  -1  13   0 1071.93   56.05
  -1 -13   0 1094.99   99.83
   1  13   0 1082.60   55.52
  -1 -13   0 1084.96   54.40
   1 -13   0 1061.21   54.93
   1  13   0 1089.32   94.30
  -1  13   0 1071.30   93.55
  -1  13  -1   37.10   12.70
   1  13   1   15.17    8.47
  -1 -13  -1   18.43    8.93
   1  13   1   -1.48   19.05
  -1  13  -1    9.33   19.81
  -1  13  -1   25.85    9.90
  -1 -13  -2 1365.39  116.73
   1  13   2 1310.13   64.41
  -1  13  -2 1361.13   66.34
  -1 -13  -2 1398.14   64.74
   1  13   2 1226.10  103.46
  -1  13  -2 1309.29  104.17
  -1  13  -2 1293.12   63.56
  -1  13  -3   -0.22    8.56
   1  13   3   -4.82    8.62
  -1 -13  -3   -9.17   21.88
  -1 -13  -3   -0.78    7.62
  -1 -13  -3    1.58   21.31
  -1  13  -3    1.94    8.26
   1  13   3   -0.83   19.21
  -1  13  -3    9.70   14.77
  -1 -13  -4  684.22   82.86
  -1  13  -4  799.31   46.79
  -1 -13  -4  646.64   84.12
  -1 -13  -4  713.27   42.91
  -1  13  -4  644.12   42.45
   1  13   4  759.10   79.37
  -1 -13  -5    6.06   17.61
  -1  13  -5    4.31    9.20
  -1 -13  -5    3.71    7.58
  -1 -13  -5   -3.07   28.70
  -1  13  -5   39.53   34.04
  -1  13  -5   -5.34    9.28
  -1 -13  -6  315.04   57.52
  -1  13  -6  374.68   30.39
  -1 -13  -6  337.62   28.53
  -1 -13  -6  331.34   63.98
  -1  13  -6  299.32   28.67
  -1  13  -6  296.70   58.72
  -1 -13  -7   44.96   12.79
  -1 -13  -7   36.14   30.17
  -1  13  -7   50.19   13.71
  -1 -13  -7   31.81   25.72
  -1  13  -7   42.26    9.67
  -1  13  -7   45.84   14.16
  -1  13  -7   14.42   27.61
  -1 -13  -8   55.06   37.13
  -1 -13  -8   88.20   16.06
  -1  13  -8   63.61   13.01
  -1 -13  -8   24.04   29.72
  -1 -13  -8   81.91   15.80
  -1 -13  -8  161.57   26.14
  -1  13  -8   56.68   10.72
  -1  13  -8   69.23   16.26
  -1  13  -8  115.35   46.06
  -1  13  -9   32.20    9.70
  -1 -13  -9   51.86   13.04
  -1  13  -9   27.12   13.28
  -1  13 -10   24.12   10.28
  -1  13 -10   22.40    9.81
  -1 -13 -10   26.69   12.16
  -1  13 -10   21.03   13.56
  -1  13 -11    3.50    8.07
  -1 -13 -11   -6.20   10.83
  -1  13 -11   11.22   12.46
  -1  13 -12   75.94   13.60
  -1 -13 -12  240.52   41.41
  -1 -13 -12   67.41   15.06
  -1  13 -12  205.11   23.15
  -1  13 -13   16.86    8.74
  -1 -13 -13    9.71   10.94
  -1  13 -13    4.02   11.15
  -1  13 -14  196.14   18.80
  -1 -13 -14  198.33   20.53
  -1  13 -14  203.58   20.97
  -1  13 -15    1.15    6.21
  -1 -13 -15   -6.15    7.69
  -1  13 -15    6.50    8.03
  -1  13 -16  257.03   17.76
  -1 -13 -16  247.91   19.53
  -1  13 -16  262.72   19.16
  -1 -13 -17    5.58    5.09
   1  14 -16   11.13    5.46
   1  14 -15  135.88   14.67
   1 -14 -15  130.01   13.32
   1  14 -14   43.72   11.06
   1 -14 -14   34.74    8.78
   1  14 -14   28.87    9.30
   1  14 -13  341.86   26.82
   1 -14 -13  317.42   24.91
   1  14 -13  304.68   25.86
   1  14 -12  190.39   21.58
   1 -14 -12  164.42   19.29
   1  14 -12  178.08   21.01
   1  14 -11  309.46   27.21
   1 -14 -11  300.78   26.03
   1  14 -11  309.22   28.65
   1  14 -10  281.42   26.49
   1  14 -10  268.66   23.33
   1 -14 -10  312.20   27.25
   1  14 -10  265.26   27.85
   1 -14  -9  781.27   44.68
   1  14  -9  643.47   41.72
   1  14  -9  585.27   37.92
   1 -14  -9  499.79   38.83
   1 -14  -9  617.46   41.15
   1  14  -9  808.00   49.60
   1 -14  -8  368.89   31.28
   1  14  -8  495.92   35.81
   1 -14  -8  410.71   32.27
   1  14  -8  395.73   30.49
   1  14  -8  431.18   36.94
   1 -14  -7  768.78   47.48
   1 -14  -7  693.93  101.20
   1  14  -7  857.74   50.55
   1  14  -7  792.52   45.58
   1  14  -7  817.19   52.85
   1  14  -7  755.71  100.64
  -1  14   7  656.51   80.36
   1 -14  -6  184.77   21.58
   1 -14  -6  184.58   57.44
   1  14  -6  216.62   24.36
   1  14  -6  186.41   20.86
   1  14  -6  202.48   25.70
   1  14  -6  191.78   53.97
  -1  14   6  189.07   45.19
   1 -14  -5  337.27   29.30
   1 -14  -5  314.17   69.13
  -1  14   5  372.52   30.97
   1  14  -5  373.18   32.32
   1  14  -5  373.16   29.28
   1  14  -5  386.66   33.98
   1  14  -5  374.66   69.34
  -1  14   5  356.81   58.00
  -1  14   4  123.20   19.19
   1  14  -4  145.89   20.06
   1 -14  -4  129.68   18.47
   1 -14  -4   74.87   37.71
  -1 -14   4  145.20   18.07
   1  14  -4   97.41   30.54
   1  14  -4  145.33   21.61
  -1  14   4  163.49   41.86
   1  14  -3    9.97    9.76
  -1  14   3    3.91    9.88
   1 -14  -3   35.35   37.22
  -1 -14   3    2.81    7.72
   1  14  -3    7.49   19.62
  -1  14   3   51.71   29.18
   1  14  -3   13.54   11.03
  -1  14   2   21.03   10.96
   1  14  -2   21.08    9.89
   1 -14  -2   53.25   13.20
   1 -14  -2   27.66   36.26
  -1 -14   2   30.34   10.33
  -1  14   2   21.86   21.17
   1  14  -2   31.36   12.61
   1  14  -2   66.64   30.42
  -1  14   1   13.66    9.11
   1  14  -1    4.54    8.58
   1 -14  -1    4.22    8.34
  -1 -14   1   11.28    8.86
  -1  14   1   -7.25   19.77
   1  14  -1  -13.27   20.25
  -1 -14   0   53.66   32.10
   1  14   0   14.19    9.40
  -1  14   0   19.52   10.22
   1 -14   0   24.51    9.82
  -1 -14   0   16.95    8.99
  -1  14   0   -5.24   25.50
   1  14   0   35.07   24.66
  -1  14   0   17.78    8.88
  -1 -14  -1   26.53   27.12
   1  14   1   47.42   12.68
  -1  14  -1   35.80   11.40
   1 -14   1   31.13   10.58
  -1 -14  -1   27.97    9.97
  -1  14  -1   32.57   23.40
  -1  14  -1   49.45   12.02
   1  14   1   47.54   26.61
  -1  14  -2   11.70   10.74
   1  14   2   35.28   15.17
  -1 -14  -2   29.81   35.70
  -1 -14  -2   18.29    9.14
  -1  14  -2    9.55    9.60
   1  14   2    3.09   23.24
  -1  14  -2   12.18   18.18
  -1 -14  -3  279.85   57.51
   1  14   3  242.44   24.53
  -1  14  -3  305.34   27.56
  -1 -14  -3  290.78   25.71
  -1 -14  -3  237.05   55.57
   1  14   3  273.29   50.88
  -1  14  -3  327.04   27.34
  -1 -14  -4  310.20   57.88
  -1  14  -4  327.93   29.05
  -1 -14  -4  277.83   60.44
  -1 -14  -4  368.40   29.29
   1  14   4  291.03   53.25
  -1  14  -4  319.23   28.67
  -1 -14  -5  661.33   85.29
  -1  14  -5  704.62   45.16
  -1 -14  -5  596.99   85.53
  -1 -14  -5  756.62   44.94
  -1  14  -5  645.07   88.95
   1  14   5  581.91   76.40
  -1  14  -5  698.28   44.97
  -1 -14  -6   43.92   13.50
  -1 -14  -6   28.95   28.90
  -1  14  -6   48.19   13.47
  -1 -14  -6   59.47   30.23
  -1  14  -6   52.08   11.72
   1  14   6   76.60   35.61
  -1  14  -6   59.66   14.90
  -1  14  -6   66.24   39.09
  -1 -14  -7  544.52   84.03
  -1 -14  -7  577.16   38.61
  -1  14  -7  604.73   38.62
  -1 -14  -7  503.29   72.26
  -1  14  -7  391.51   29.98
  -1  14  -7  537.00   39.79
  -1  14  -7  549.43   83.22
   1  14   7  438.74   66.68
  -1 -14  -8  111.21   18.26
  -1  14  -8   90.89   14.90
  -1  14  -8   78.09   12.36
  -1 -14  -8  123.01   18.09
  -1  14  -8  138.71   20.90
  -1  14  -9  246.51   23.85
  -1 -14  -9  302.36   28.16
  -1  14  -9  342.20   32.17
  -1  14 -10  534.91   34.00
  -1  14 -10  466.93   33.39
  -1 -14 -10  501.51   36.83
  -1  14 -10  478.37   38.31
  -1  14 -11  885.27   48.50
  -1 -14 -11  897.08   51.77
  -1 -14 -11 1028.84   58.40
  -1  14 -11  906.02   53.91
  -1  14 -12  124.37   16.51
  -1 -14 -12  163.75   34.42
  -1 -14 -12  127.55   18.15
  -1  14 -12  113.72   19.28
  -1  14 -13  473.01   30.30
  -1 -14 -13  487.52   33.10
  -1  14 -13  473.27   33.68
  -1  14 -14  174.94   16.56
  -1 -14 -14  157.07   17.27
  -1  14 -14  146.68   17.71
  -1  14 -15   13.82    6.02
  -1 -14 -15   11.20    7.07
  -1  14 -15   20.29    7.94
  -1  14 -16   61.77    7.86
  -1 -14 -16   52.82    8.44
  -1  14 -16   58.93    8.64
   1  15 -16   17.98    4.83
   1  15 -15  108.77   11.65
   1 -15 -15   73.18    9.18
   1  15 -14   89.32   12.07
   1 -15 -14   90.03   11.19
   1  15 -13  276.34   23.02
   1 -15 -13  290.81   22.42
   1  15 -13  269.72   23.19
   1  15 -12   68.33   14.19
   1 -15 -12   68.33   12.20
   1  15 -12   60.71   13.32
   1  15 -11   27.58   11.53
   1 -15 -11   23.00    9.57
   1  15 -11   27.04   11.75
   1  15 -10    5.88   11.02
   1 -15 -10   13.84    8.76
   1  15 -10   17.09    9.01
   1  15 -10   17.01   12.53
   1 -15  -9   25.33   12.13
   1  15  -9   36.35   12.29
   1 -15  -9   52.93   13.09
   1  15  -9   47.32   12.07
   1  15  -9   47.84   16.60
   1 -15  -8   -0.67    9.83
   1  15  -8   14.53   11.56
   1 -15  -8    5.55    8.55
   1  15  -8    3.31    8.83
   1  15  -8   11.21   14.73
   1 -15  -7   15.49   10.50
   1  15  -7   28.00   13.30
   1  15  -7   12.21    9.08
   1  15  -7    8.78   13.75
   1 -15  -6    3.24    9.86
   1  15  -6   10.58   12.55
   1  15  -6    1.71    8.41
   1  15  -6    5.91   13.73
  -1 -15   5  212.02   22.31
   1 -15  -5  214.50   58.54
   1 -15  -5  165.55   21.49
  -1  15   5  177.83   21.58
   1  15  -5  175.98   22.86
   1  15  -5  184.56   21.16
   1  15  -5  154.54   53.46
   1  15  -5  207.85   26.19
  -1  15   5  151.12   43.86
  -1 -15   4   19.33   10.75
   1 -15  -4   11.02   10.09
   1 -15  -4   23.95   32.36
   1  15  -4    1.18   10.33
  -1  15   4   16.04   11.09
   1  15  -4   14.34   10.00
   1  15  -4   15.36   28.18
  -1  15   4   23.68   26.74
   1  15  -4    9.44   12.46
   1  15  -3  170.56   21.70
  -1  15   3  147.63   20.34
   1 -15  -3  153.49   53.17
   1 -15  -3  141.32   19.31
  -1 -15   3  180.23   20.36
   1  15  -3   97.03   33.10
  -1  15   3  141.74   40.70
   1  15  -3  171.95   22.72
  -1  15   2  321.26   29.34
   1  15  -2  284.78   27.07
   1 -15  -2  311.54   27.89
  -1 -15   2  315.08   27.02
   1 -15  -2  275.10   62.97
  -1  15   2  316.81   55.77
   1  15  -2  250.56   50.08
   1  15  -1 1114.42   60.83
  -1  15   1 1180.21   62.91
  -1 -15   1 1245.73   61.68
   1 -15  -1 1268.57   63.14
  -1  15   1 1141.61  105.29
   1  15  -1 1132.37  103.98
   1  15   0   45.35   13.02
  -1  15   0   60.45   15.11
  -1 -15   0   46.88   12.35
   1 -15   0   52.14   13.59
   1  15   0  101.04   35.42
  -1  15   0   83.76   33.62
   1  15   1  499.52   36.86
  -1  15  -1  562.23   38.71
   1 -15   1  540.75   37.10
  -1 -15  -1  571.19   37.66
  -1  15  -1  561.38   37.04
   1  15   1  530.59   70.99
  -1  15  -1  563.74   71.07
  -1 -15  -2    9.24   25.06
   1  15   2   46.59   12.67
  -1  15  -2   32.75   13.07
  -1 -15  -2   35.11   11.62
  -1 -15  -2   56.24   33.90
   1 -15   2   48.09   12.59
  -1  15  -2   29.87   11.38
   1  15   2   46.32   28.65
  -1  15  -2    7.48   17.01
  -1  15  -3  409.16   33.05
  -1 -15  -3  406.34   71.05
   1  15   3  399.77   32.13
  -1 -15  -3  491.06   34.25
  -1 -15  -3  378.12   69.25
  -1  15  -3  414.12   32.83
   1  15   3  420.60   63.76
  -1 -15  -4  120.21   43.52
   1  15   4  141.92   18.71
  -1  15  -4  140.44   19.90
  -1 -15  -4  146.65   48.15
  -1 -15  -4  142.37   19.12
  -1  15  -4  103.84   43.95
   1  15   4  119.97   39.04
  -1  15  -4  122.23   19.20
  -1  15  -5  721.64   45.33
  -1 -15  -5  647.08   92.48
  -1 -15  -5  680.08   43.77
   1  15   5  667.80   82.24
  -1  15  -5  668.22   44.76
  -1  15  -5  601.79   90.09
  -1 -15  -6  110.36   17.92
  -1  15  -6  120.19   18.43
  -1  15  -6   92.60   14.17
  -1  15  -6  148.02   21.29
  -1 -15  -7  235.00   24.90
  -1  15  -7  208.98   23.03
  -1  15  -7  160.86   17.76
  -1  15  -7  247.77   26.89
  -1 -15  -8   52.01   14.60
  -1  15  -8   25.48   10.55
  -1 -15  -8   31.10   11.92
  -1  15  -8   25.71    8.04
  -1  15  -8   19.43   14.31
  -1  15  -9    9.09    7.85
  -1 -15  -9    2.89   10.92
  -1  15  -9    7.86    6.59
  -1  15  -9   -2.25   13.55
  -1  15 -10    8.04    9.08
  -1  15 -10    4.96    7.43
  -1 -15 -10    0.21   23.09
  -1 -15 -10    8.56   10.27
  -1  15 -10   18.15   14.71
  -1  15 -11   21.95    9.32
  -1 -15 -11   17.46    9.80
  -1  15 -11   13.39   11.56
  -1  15 -12   46.90   10.93
  -1 -15 -12   38.11   11.46
  -1  15 -12   42.20   13.52
  -1  15 -13  105.10   13.44
  -1 -15 -13   93.61   13.97
  -1  15 -13   85.56   14.87
  -1  15 -14   -1.52    5.23
  -1 -15 -14   -2.80    7.22
  -1  15 -14   -0.59    7.44
  -1  15 -15  302.01   18.41
  -1 -15 -15  292.34   19.78
  -1  15 -15  293.01   20.11
   1  16 -15   16.78    5.29
   1  16 -14  165.23   14.61
   1 -16 -14  151.45   12.69
   1  16 -13   30.69    8.66
   1 -16 -13   27.61    6.79
   1  16 -12  152.84   17.13
   1 -16 -12  155.57   16.14
   1  16 -11   47.04   11.71
   1 -16 -11   41.65   10.08
   1  16 -11   31.63   11.59
   1  16 -10  652.51   39.16
   1 -16 -10  685.46   39.75
   1  16 -10  582.32   35.13
   1  16 -10  630.26   41.60
   1  16  -9   30.30   12.11
   1 -16  -9   25.45    9.93
   1  16  -9   29.54    9.40
   1  16  -9   19.22   13.31
   1 -16  -8  615.88   40.91
   1  16  -8  660.66   42.63
   1 -16  -8  617.62   40.04
   1  16  -8  602.23   38.02
   1  16  -8  649.59   45.85
   1 -16  -7    5.23   10.73
   1  16  -7   -0.63   11.54
   1  16  -7    1.03    9.13
   1 -16  -7    9.33    8.96
   1  16  -7   -3.05   13.33
   1 -16  -6  677.59   43.91
   1  16  -6  741.94   46.78
   1  16  -6  633.84   40.98
   1  16  -6  664.43   47.81
   1 -16  -5   10.06   11.33
   1  16  -5    5.21   11.31
  -1  16   5   21.80   11.88
   1  16  -5   17.92   11.13
   1  16  -5    8.15   13.68
  -1 -16   4  525.06   36.06
   1 -16  -4  489.62   36.97
   1  16  -4  488.46   35.67
   1  16  -4  541.51   38.98
  -1  16   4  449.29   35.65
   1  16  -3   -3.70   11.54
  -1  16   3    4.85   10.40
  -1 -16   3    7.44   10.03
   1 -16  -3   -6.74   11.57
  -1  16   2    1.19   10.80
   1  16  -2    1.47   10.48
   1 -16  -2  -10.53   10.72
  -1 -16   2   17.80    9.87
  -1  16   1   15.91   12.39
   1  16  -1   -7.96   10.51
   1 -16  -1   -0.03    9.65
  -1 -16   1    4.91    8.11
   1  16   0   65.80   15.10
  -1  16   0   57.44   15.02
  -1 -16   0   75.50   14.80
   1 -16   0   51.80   13.46
  -1  16   0   40.25   31.72
  -1  16  -1    1.07   11.03
   1  16   1    1.17    9.94
  -1 -16  -1   -4.69    9.35
   1 -16   1   11.48   10.51
  -1  16  -1   -9.74   28.56
   1  16   2   54.41   14.32
  -1  16  -2   73.43   16.52
   1 -16   2   86.85   15.37
  -1 -16  -2   70.54   14.89
  -1  16  -2   79.52   15.09
   1  16   3   13.48   10.44
  -1  16  -3   13.74   11.37
   1 -16   3   11.04    9.71
  -1 -16  -3    0.45    9.62
  -1  16  -3   11.78    9.83
   1  16   4  296.81   26.84
  -1  16  -4  320.04   29.14
   1 -16   4  304.22   27.49
  -1 -16  -4  292.57   27.51
  -1  16  -4  315.18   28.66
  -1 -16  -5   30.18   11.92
  -1  16  -5   35.16   13.41
  -1  16  -5   37.03   10.46
  -1  16  -5   22.94   12.24
  -1 -16  -6  590.05   40.05
  -1  16  -6  646.70   40.82
  -1  16  -6  622.70   41.71
  -1 -16  -7    3.63   10.78
  -1  16  -7    4.84   10.36
  -1  16  -7   14.26    7.65
  -1  16  -7    9.75   12.83
  -1  16  -8  834.38   46.04
  -1 -16  -8  886.68   48.43
  -1  16  -8  922.86   52.45
  -1  16  -9    6.94    8.72
  -1  16  -9   12.95    8.64
  -1 -16  -9   -6.76   10.50
  -1  16  -9   13.45    6.63
  -1  16  -9    0.24   13.31
  -1  16 -10  692.64   39.29
  -1 -16 -10  745.79   42.50
  -1  16 -10  728.53   45.25
  -1  16 -11    4.02    7.32
  -1 -16 -11    4.41    8.21
  -1  16 -11    0.54   11.41
  -1  16 -12  304.29   22.26
  -1 -16 -12  275.92   22.92
  -1  16 -12  301.97   25.59
  -1  16 -13    7.68    5.88
  -1 -16 -13   16.14    7.84
  -1  16 -13   14.05    9.52
  -1  16 -14  107.73   10.98
  -1 -16 -14  104.90   11.74
  -1  16 -14  122.74   13.20
  -1 -16 -15   12.35    4.84
   1  17 -14   72.34    8.58
   1 -17 -13  152.26   12.68
   1  17 -13  185.64   15.16
   1 -17 -12   30.01    7.04
   1  17 -12   15.28    6.97
   1 -17 -11  104.49   12.97
   1  17 -11   97.03   13.61
   1 -17 -10   15.52    8.00
   1  17 -10   18.47    7.53
   1  17 -10   21.69    9.69
   1 -17  -9   -1.93    7.73
   1  17  -9    2.57    7.01
   1  17  -9    0.72    8.80
   1 -17  -8    7.74    9.79
   1 -17  -8    2.00    7.78
   1  17  -8   -3.67    8.95
   1  17  -8    5.89   10.60
   1 -17  -7   37.26   13.19
   1 -17  -7   40.97   11.89
   1  17  -7   39.36   11.36
   1  17  -7   40.27   13.78
   1 -17  -6  128.04   19.28
   1  17  -6  118.86   17.01
   1  17  -6  122.73   18.93
   1 -17  -5  316.01   28.86
   1  17  -5  315.04   27.41
  -1  17   5  305.24   26.50
   1  17  -5  323.07   29.81
   1 -17  -4  208.77   23.86
  -1 -17   4  216.53   22.53
   1  17  -4  191.61   22.16
   1  17  -4  203.67   23.76
  -1  17   4  174.46   20.99
   1 -17  -3  303.04   28.83
  -1 -17   3  335.18   28.20
   1  17  -3  308.71   27.82
  -1  17   3  283.39   27.76
   1  17  -3  336.88   29.70
   1  17  -2  153.74   21.28
  -1  17   2  177.75   22.10
   1 -17  -2  154.64   21.09
  -1 -17   2  189.16   21.26
   1  17  -1  347.40   30.96
  -1  17   1  372.55   32.23
  -1 -17   1  406.71   31.47
   1 -17  -1  412.69   32.51
   1  17   0   13.00   11.33
  -1  17   0   22.78   12.20
   1 -17   0   25.22   11.77
  -1 -17   0   24.87   12.24
   1  17   1  831.42   49.78
  -1  17  -1  771.52   48.86
   1 -17   1  850.64   49.29
  -1 -17  -1  860.50   49.18
   1  17   2  141.29   20.11
  -1  17  -2  170.92   22.45
   1 -17   2  163.36   20.51
  -1 -17  -2  193.16   21.67
  -1  17  -3  150.07   20.97
   1  17   3  167.48   20.53
  -1 -17  -3  163.66   20.67
   1 -17   3  162.98   20.34
  -1  17  -3  158.01   20.43
  -1  17  -4  336.42   29.62
   1  17   4  367.01   28.65
   1 -17   4  308.01   27.59
  -1 -17  -4  310.26   28.67
  -1  17  -4  309.65   28.52
  -1 -17  -5  171.01   21.24
   1 -17   5  157.88   20.51
  -1  17  -5  166.14   21.28
  -1  17  -5  149.41   18.02
  -1  17  -5  169.31   22.20
  -1 -17  -6   95.20   16.59
   1 -17   6   80.22   14.82
  -1  17  -6   88.04   16.36
  -1  17  -6   81.25   13.32
  -1  17  -6   90.80   17.34
   1 -17   7  161.20   18.88
  -1 -17  -7  182.21   21.71
  -1  17  -7  174.20   20.46
  -1 -17  -7  178.35   21.00
  -1  17  -7  126.92   15.61
  -1  17  -7  191.34   23.79
   1 -17   8   62.24   13.20
  -1  17  -8   71.54   13.46
  -1 -17  -8   70.31   14.30
  -1  17  -8   32.09    9.26
  -1  17  -8   61.28   17.14
   1 -17   9    0.65    7.15
  -1  17  -9    8.45    7.79
  -1  17  -9    6.80    7.18
  -1 -17  -9   12.18    9.69
  -1  17  -9    8.83    5.37
  -1  17  -9   12.27   12.23
   1 -17  10   40.10    9.33
  -1  17 -10   33.92    9.50
  -1 -17 -10   32.06   10.70
  -1  17 -10   33.51   13.31
  -1  17 -11    7.73    6.75
  -1 -17 -11    2.14    6.92
  -1  17 -11    9.10   10.40
  -1  17 -12   48.66    8.72
  -1 -17 -12   33.51    8.39
  -1  17 -12   41.95   10.34
  -1  17 -13  213.94   15.60
  -1 -17 -13  209.85   16.31
  -1  17 -13  225.07   18.07
  -1 -17 -14   12.04    4.45
   1  18 -13   70.23    8.19
   1 -18 -12  132.17   11.38
   1  18 -12  165.17   13.85
   1 -18 -11  270.56   18.56
   1  18 -11  261.81   19.47
   1 -18 -10   64.93   10.18
   1  18 -10   74.41   11.82
   1  18  -9  289.53   21.64
   1 -18  -9  356.27   24.40
   1  18  -9  315.07   24.01
   1 -18  -8  166.98   17.91
   1  18  -8  147.13   16.07
   1  18  -8  173.30   18.57
   1 -18  -7  659.93   39.73
   1 -18  -7  616.23   37.46
   1  18  -7  603.17   36.56
   1  18  -7  653.41   40.09
   1 -18  -6  314.14   27.22
   1  18  -6  280.92   24.32
   1 -18  -6  285.61   24.57
   1  18  -6  277.22   26.06
   1 -18  -5  114.55   17.76
   1  18  -5   79.25   14.26
  -1  18   5   91.42   14.05
   1  18  -5  114.15   18.63
  -1 -18   4   29.74    9.91
   1 -18  -4   23.39   11.72
   1  18  -4   29.66   11.87
   1  18  -4   26.71   12.49
  -1  18   4   31.10   11.84
  -1 -18   3  200.91   21.21
   1 -18  -3  160.28   20.63
   1  18  -3  214.13   21.85
  -1  18   3  159.68   20.01
   1  18  -3  164.45   21.58
   1 -18  -2   41.75   13.93
  -1 -18   2   30.25   11.10
   1  18  -2   50.68   13.61
   1  18  -2   32.78   13.03
  -1  18   2   46.73   13.94
  -1 -18   1   95.31   15.79
   1 -18  -1   86.13   16.61
  -1  18   1   84.59   16.79
   1  18  -1   88.77   17.00
   1 -18   0    6.21    9.56
  -1 -18   0   14.88    9.67
  -1  18   0    9.36   10.90
   1  18   0   -1.71   10.66
  -1 -18  -1   79.32   14.94
   1 -18   1   94.01   16.07
  -1  18  -1   81.88   16.52
   1  18   1   60.60   14.74
   1 -18   2   13.09   10.18
  -1 -18  -2    8.95    9.81
   1  18   2   19.60   11.36
  -1  18  -2    5.94   10.82
  -1 -18  -3   57.61   13.38
   1 -18   3   41.79   12.69
  -1  18  -3   38.31   13.82
   1  18   3   61.04   13.65
  -1 -18  -4  110.15   17.65
   1 -18   4   99.18   15.78
  -1  18  -4  112.60   16.03
  -1  18  -4  102.88   17.96
  -1 -18  -5  127.61   18.34
   1 -18   5  148.57   18.75
  -1  18  -5  143.41   19.20
  -1  18  -5  146.63   17.04
  -1 -18  -6   83.95   15.29
   1 -18   6   75.95   14.05
  -1  18  -6   64.22   14.19
  -1  18  -6   78.88   12.36
  -1  18  -6  101.29   17.44
   1 -18   7  444.39   30.60
  -1  18  -7  437.69   30.81
  -1 -18  -7  444.17   31.24
  -1  18  -7  419.74   27.51
  -1  18  -7  428.84   32.94
   1 -18   8   22.65    8.71
  -1  18  -8   21.16    8.99
  -1 -18  -8   24.58    9.80
  -1  18  -8   22.94    6.92
  -1  18  -8   33.74   12.08
   1 -18   9  238.46   19.53
  -1  18  -9  235.69   19.91
  -1  18  -9  215.86   18.77
  -1 -18  -9  236.93   21.14
  -1  18  -9  265.32   24.40
  -1  18 -10   41.78    8.97
  -1 -18 -10   39.51    9.88
  -1  18 -10   41.84   11.66
  -1 -18 -11  100.73   12.28
  -1  18 -11  101.68   11.62
  -1 -18 -12   34.52    7.08
  -1  18 -12   36.72    6.84
   1  19 -11   24.79    6.01
   1 -19 -10   25.71    6.11
   1  19 -10   32.44    7.97
   1 -19  -9   18.21    6.44
   1  19  -9   19.39    6.28
   1  19  -9   19.05    7.59
   1 -19  -8   11.75    6.26
   1  19  -8   15.97    7.75
   1  19  -8   16.70    8.11
   1 -19  -7   17.59    8.76
   1 -19  -7   18.24    7.70
   1  19  -7   13.77    7.77
   1 -19  -6   58.34   12.59
   1 -19  -6   59.79   11.17
   1  19  -6   66.75   12.40
   1  19  -6   77.92   14.43
   1 -19  -5   -3.36    9.25
   1  19  -5   -4.36    8.46
  -1  19   5   -5.70    7.45
   1  19  -5   -5.28   10.22
   1 -19  -4  499.95   34.09
   1  19  -4  510.29   33.07
   1  19  -4  523.90   34.67
  -1  19   4  431.85   30.18
   1 -19  -3   19.88   10.69
  -1 -19   3   18.78    9.28
   1  19  -3   15.22   10.03
   1  19  -3   18.88   11.47
  -1  19   3   13.93    9.33
  -1 -19   2  485.36   32.10
   1 -19  -2  428.06   31.75
   1  19  -2  421.60   31.48
  -1  19   2  401.27   30.92
   1  19  -2  434.99   32.29
  -1 -19   1  162.52   18.60
   1 -19  -1  154.80   18.94
   1  19  -1  147.97   18.49
   1  19  -1  157.15   19.89
  -1  19   1  128.44   18.63
  -1 -19   0  296.04   25.34
   1 -19   0  310.60   26.78
   1  19   0  312.81   26.28
   1  19   0  313.82   27.46
  -1  19   0  294.95   27.11
  -1 -19  -1   10.30    9.84
   1 -19   1    9.14    8.99
   1  19   1   23.69   12.05
  -1  19  -1    2.84   10.62
  -1 -19  -2  626.96   38.58
   1 -19   2  594.32   38.06
  -1  19  -2  587.62   39.15
   1  19   2  650.34   39.40
  -1 -19  -3    1.64    8.38
   1 -19   3   -2.88    8.36
  -1  19  -3   -1.81    8.62
   1  19   3   22.89    9.88
  -1  19  -3    6.94   11.76
  -1 -19  -4  367.65   27.64
   1 -19   4  335.84   26.46
  -1  19  -4  353.31   26.06
  -1  19  -4  315.02   27.77
   1 -19   5    5.56    8.14
  -1 -19  -5   -0.89    8.23
  -1  19  -5    2.36    7.15
  -1  19  -5    1.32    9.44
   1 -19   6   68.52   12.42
  -1  19  -6   69.02   10.86
  -1 -19  -6   83.92   13.39
  -1  19  -6   77.83   14.06
   1 -19   7    0.28    6.65
  -1 -19  -7    0.46    7.22
  -1  19  -7    5.04    5.85
  -1  19  -7   -5.31    7.70
   1 -19   8   69.27   10.57
  -1  19  -8   38.93    7.41
  -1 -19  -8   49.92   10.81
  -1  19  -8   50.84    9.79
  -1  19  -8   44.99    9.08
  -1 -19  -9    2.18    6.06
  -1  19  -9   -0.69    5.51
  -1 -19 -10   -1.15    5.21
  -1  19 -10   -0.53    4.72
  -1 -19 -11   26.33    5.96
  -1  19 -11   31.91    6.12
   1  20 -10  118.22   10.62
   1 -20  -9  329.39   19.14
   1  20  -9  392.31   21.94
   1  20  -8   56.62    8.43
   1 -20  -8   66.28    9.05
   1  20  -8   63.62    9.84
   1 -20  -7  306.06   20.71
   1  20  -7  321.56   21.21
   1  20  -7  345.95   22.65
   1 -20  -6   22.93    8.81
   1  20  -6   19.75    7.37
   1 -20  -6   23.43    7.39
   1 -20  -5  254.98   21.21
   1  20  -5  256.69   20.43
   1 -20  -5  244.28   19.54
   1  20  -5  260.49   21.80
   1 -20  -4  107.28   15.00
   1  20  -4   94.03   13.58
  -1  20   4  100.91   13.17
   1  20  -4  115.71   15.93
   1 -20  -3  103.32   15.15
   1  20  -3  101.35   14.38
  -1  20   3  111.75   14.59
   1  20  -3  112.59   15.99
  -1 -20   2   23.50    8.80
   1 -20  -2   19.33    9.43
   1  20  -2   30.80   10.52
   1  20  -2   18.42   10.09
  -1  20   2   31.15    9.70
   1 -20  -1   65.81   12.91
  -1 -20   1   68.92   11.98
   1  20  -1   42.59   11.62
   1  20  -1   64.22   13.66
  -1  20   1   37.10   11.46
  -1 -20   0  113.33   14.68
   1 -20   0   84.67   13.61
   1  20   0   87.85   14.30
   1  20   0  111.77   16.01
  -1  20   0   85.28   14.94
  -1 -20  -1   19.06    8.68
   1 -20   1   15.49    8.65
   1  20   1   16.14    9.72
  -1  20  -1   17.73   10.94
   1  20   1   24.23   10.31
  -1 -20  -2    0.08    7.23
   1 -20   2    3.04    7.47
   1  20   2    5.48    8.12
  -1  20  -2    6.10    7.93
  -1  20  -2    5.85   10.59
   1  20   2   -2.82    8.52
  -1 -20  -3   98.56   13.96
   1 -20   3  111.85   14.60
  -1  20  -3  103.12   13.97
  -1  20  -3   99.03   16.13
   1  20   3  108.01   13.41
   1 -20   4   41.14    9.95
  -1 -20  -4   34.13    9.64
  -1  20  -4   36.90    9.32
  -1  20  -4   29.33   10.71
   1 -20   5  167.27   16.85
  -1 -20  -5  176.43   17.63
  -1  20  -5  180.72   16.24
  -1  20  -5  200.79   19.26
   1 -20   6   22.60    7.70
  -1 -20  -6   23.67    8.10
  -1  20  -6   27.41    7.31
  -1  20  -6   26.05    9.01
   1 -20   7  356.07   21.85
  -1  20  -7  303.23   19.61
  -1 -20  -7  330.54   22.67
   1  20   7  313.25   20.11
  -1  20  -7  354.08   23.09
  -1  20  -7  349.21   22.34
  -1 -20  -8   96.23   11.51
  -1  20  -8   77.69   10.06
  -1 -20  -9  230.93   16.46
  -1  20  -9  246.75   16.30
  -1 -20 -10  118.68   10.31
   1  21  -8    0.82    4.23
   1  21  -7    9.49    4.65
   1 -21  -7    6.02    4.08
   1  21  -7    1.92    4.74
   1 -21  -6   89.87    9.77
   1  21  -6  105.25   11.00
   1  21  -6  109.24   11.58
   1 -21  -5   77.61   10.64
   1 -21  -5   74.21    9.39
   1  21  -5   73.48   10.05
   1 -21  -4   52.75    9.76
   1 -21  -4   51.64    8.51
   1  21  -4   40.44    8.37
   1 -21  -3   92.42   12.06
   1  21  -3   81.60   11.63
  -1  21   3   76.57   10.40
   1 -21  -2   49.24   10.28
   1  21  -2   61.65   10.73
   1  21  -2   54.57   11.09
  -1  21   2   57.33    9.84
   1 -21  -1  152.28   15.88
  -1 -21   1  170.19   15.08
   1  21  -1  154.64   15.73
   1  21  -1  167.39   16.99
  -1  21   1  159.85   16.03
  -1 -21   0  128.72   13.75
   1 -21   0  132.06   14.45
   1  21   0  118.04   14.23
  -1  21   0  132.09   15.23
  -1  21   0  138.58   15.47
   1  21   0  125.34   14.62
   1 -21   1  282.89   21.22
  -1 -21  -1  317.72   21.73
  -1  21  -1  278.18   21.30
   1  21   1  271.95   21.09
   1  21   1  288.83   21.24
  -1  21  -1  294.41   22.66
   1 -21   2  116.66   13.37
  -1 -21  -2  111.30   13.02
  -1  21  -2  137.92   14.27
   1  21   2  106.47   13.36
  -1  21  -2  123.09   15.18
   1 -21   3  230.95   18.40
  -1  21  -3  221.11   17.60
   1  21   3  214.97   17.91
  -1  21  -3  226.93   19.68
   1 -21   4   37.20    8.18
  -1 -21  -4   35.30    8.15
   1  21   4   42.35    8.45
  -1  21  -4   44.50    8.38
  -1  21  -4   48.80   10.25
   1 -21   5   77.19    9.84
  -1  21  -5   61.22    8.64
   1  21   5   63.53    9.13
  -1 -21  -5   69.10    9.70
  -1  21  -5   68.80   10.61
   1 -21   6    8.24    5.99
  -1 -21  -6    9.27    5.50
  -1  21  -6   12.30    4.74
   1  21   6   13.37    5.22
  -1  21  -6   12.14    5.99
  -1  21  -6    8.65    5.38
  -1 -21  -7    1.42    4.19
  -1  21  -7    6.20    4.60
  -1 -21  -8   32.75    5.97
  -1  21  -8   35.63    5.88
   1  22  -6  193.58   13.12
   1  22  -5    1.96    3.87
  -1  22   5    4.68    4.36
   1  22  -5    3.16    4.17
   1  22  -4  357.27   20.52
  -1  22   4  363.82   20.71
   1 -22  -3    6.44    5.37
   1 -22  -3    2.53    3.78
   1  22  -3   -0.41    4.70
   1 -22  -2   33.73    7.05
   1 -22  -2   29.09    6.03
   1  22  -2   46.99    8.16
  -1  22   2   36.39    7.68
  -1  22   2   35.40    7.04
   1 -22  -1    0.37    4.71
   1  22  -1    1.82    5.31
  -1  22   1    5.90    5.79
  -1  22   1    2.27    5.36
   1 -22   0   -0.48    4.77
  -1  22   0    2.59    5.27
   1  22   0    1.24    5.10
  -1  22   0   -5.87    5.99
   1 -22   1    5.24    4.56
   1  22   1    0.70    5.45
  -1  22  -1   10.28    5.86
  -1  22  -1    5.49    6.05
   1 -22   2   26.71    6.67
  -1  22  -2   25.03    6.10
   1  22   2   24.18    6.77
  -1  22  -2   23.58    7.33
   1 -22   3    0.52    4.79
  -1 -22  -3    1.05    4.43
  -1  22  -3   -7.58    4.87
   1  22   3    8.24    5.15
  -1  22  -3    5.05    5.94
  -1  22  -4   49.12    6.89
   1  22   4   58.20    7.61
  -1 -22  -4   52.38    7.66
  -1  22  -4   51.48    8.54
  -1 -22  -5   10.31    4.68
  -1  22  -5    4.66    3.74
   2   0 -20  489.97   28.70
   2   0 -20  470.25   26.88
   2   0 -20  498.01   29.27
   2   0 -19    3.54    8.08
   2   0 -19    1.36    7.54
   2   0 -19   -1.10    8.89
   2   0 -19   -8.99    9.56
   2   0 -18  594.74   38.66
   2   0 -18  628.57   39.22
   2   0 -18  598.21   39.18
   2   0 -18  556.29   35.58
   2   0 -18  703.97   40.85
   2   0 -17   -0.74   10.79
   2   0 -17   -0.50    9.37
   2   0 -17   -3.88    7.76
   2   0 -17    5.24   11.97
   2   0 -17   15.37   17.59
   2   0 -17   -2.43   12.02
   2   0 -16  249.99   25.68
   2   0 -16  258.05   26.21
   2   0 -16  266.31   25.94
   2   0 -16  177.66   21.23
   2   0 -16  268.32   25.01
   2   0 -16  300.14   28.51
   2   0 -15    1.19    8.77
   2   0 -15   -1.14    9.63
   2   0 -15    2.59    7.59
   2   0 -15   -7.90   10.48
   2   0 -15   -2.52   11.57
   2   0 -15    2.12   11.16
   2   0 -14  904.22   50.34
   2   0 -14  899.57   49.92
   2   0 -14  948.68   49.94
   2   0 -14  737.83   47.17
   2   0 -14  911.44   49.23
   2   0 -14  915.77   48.25
   2   0 -14  938.23   51.36
   2   0 -13   -0.18    8.35
   2   0 -13    5.89    8.95
   2   0 -13   -1.13    8.82
   2   0 -13    1.57    8.77
   2   0 -13    6.12    7.82
   2   0 -13   -0.69    6.77
   2   0 -13   -3.99    7.98
   2   0 -13    3.25    7.75
   2   0 -12  277.45   23.38
   2   0 -12  255.52   23.41
   2   0 -12  277.58   22.64
   2   0 -12  255.85   22.90
   2   0 -12  282.15   23.48
   2   0 -12  284.80   24.07
   2   0 -12  254.09   22.11
   2   0 -11   -6.46   16.41
   2   0 -10  147.89   26.26
   2   0 -10  142.30   27.97
   2   0 -10  160.28   32.63
   2   0  -9   -5.02   13.06
   2   0  -9    3.63   12.69
   2   0  -9    4.15   17.75
   2   0  -8   21.96   24.20
   2   0  -8   -3.50   12.81
   2   0  -8    0.05   13.02
   2   0  -8    3.52   16.26
   2   0  -7   -8.99   22.01
   2   0  -7   -6.70   13.53
   2   0  -7   -3.47   10.73
  -2   0   7   -2.34    5.14
   2   0  -7    3.10   15.18
   2   0  -6   51.76   22.89
   2   0  -6   48.70   15.88
   2   0  -6   77.83   16.55
  -2   0   6   54.29    9.40
   2   0  -6   63.54   19.00
   2   0  -5   -1.17    8.72
   2   0  -5    3.35   16.00
   2   0  -5    3.91   11.31
  -2   0   5    0.75    5.61
   2   0  -4  378.54   27.68
   2   0  -4  376.57   36.31
   2   0  -4  368.86   29.69
  -2   0   4  357.86   24.37
   2   0  -3   -3.01    6.57
  -2   0   3   -4.94    7.15
   2   0  -2 4474.50  158.09
   2   0  -2 4155.63  150.31
  -2   0   2 4408.37  155.58
   2   0  -1    9.63    7.53
   2   0  -1   -0.41    7.44
  -2   0   1   -3.60    7.00
   2   0   0 1283.26   53.49
   2   0   0 1280.50   53.83
  -2   0   0 1389.17   57.85
   2   0   1    0.52    3.63
  -2   0  -1    0.80    2.65
  -2   0  -1    2.10    7.61
   2   0   2 3761.14  122.69
  -2   0  -2 3974.50  132.00
  -2   0  -3    2.38    6.70
  -2   0  -3    3.45    8.83
  -2   0  -4 1449.00   72.61
  -2   0  -4 1494.77   68.80
  -2   0  -5   -2.57   11.63
  -2   0  -5    2.17    9.43
  -2   0  -6 2814.81  125.45
  -2   0  -6 2814.70  123.98
  -2   0  -7   -1.54   11.99
  -2   0  -7   -2.85   12.37
  -2   0  -8   22.26   12.55
  -2   0  -8   18.93   14.14
  -2   0  -9   16.51   14.34
  -2   0  -9   -4.98   13.60
  -2   0 -10  282.97   39.13
  -2   0 -10  367.33   50.06
  -2   0 -11  -23.00   17.12
  -2   0 -11   -8.40   21.06
  -2   0 -12    7.19    8.02
  -2   0 -12    2.37    7.71
  -2   0 -12   40.55   18.53
  -2   0 -12    8.98    7.70
  -2   0 -12    5.21    7.04
  -2   0 -12   -3.38   20.44
  -2   0 -13  -10.81    8.58
  -2   0 -13  -16.28   20.84
  -2   0 -13    0.37    9.11
  -2   0 -13   22.32   24.19
  -2   0 -13    3.26    6.33
  -2   0 -13    0.53    6.55
  -2   0 -14 1233.56   58.70
  -2   0 -14 1233.85   60.02
  -2   0 -14 1099.34   55.05
  -2   0 -15   -1.11   10.00
  -2   0 -15   -8.59   11.31
  -2   0 -15    1.47    5.82
  -2   0 -15    4.78    8.23
  -2   0 -16  449.47   35.52
  -2   0 -16  458.98   33.20
  -2   0 -17  -11.34   12.54
  -2   0 -17   -3.39    9.32
  -2   0 -18  327.46   29.14
  -2   0 -18  316.77   25.28
  -2   0 -19    8.56   10.38
  -2   0 -19  -17.81    9.17
  -2   0 -19  -27.80   10.68
  -2   0 -19   -2.77    8.07
  -2   0 -20  782.08   39.34
  -2   0 -20  887.89   41.49
  -2   0 -20  850.27   39.81
  -2   0 -21    2.36    4.72
   2   1 -20   15.63    7.13
   2   1 -20    4.45    6.39
   2  -1 -20   16.84    7.67
   2  -1 -20   13.68    6.43
   2   1 -20   27.57    8.01
   2  -1 -19  144.62   17.39
   2   1 -19  145.10   17.17
   2   1 -19  163.61   17.72
   2  -1 -19  158.30   15.83
   2   1 -19  130.81   16.80
   2   1 -19  139.84   16.12
   2  -1 -19  149.18   16.79
   2  -1 -19  138.85   17.05
   2  -1 -18   43.17   12.85
   2   1 -18   61.18   13.85
   2  -1 -18   44.85   12.81
   2  -1 -18   40.43   10.34
   2   1 -18   58.45   14.64
   2   1 -18   36.89   11.58
   2  -1 -18   62.88   12.51
   2  -1 -18   50.33   13.63
   2   1 -18   32.35   11.62
   2  -1 -18   69.42   15.58
   2  -1 -17   46.12   14.36
   2   1 -17   59.31   14.23
   2   1 -17   49.44   12.02
   2  -1 -17   40.58   11.46
   2  -1 -17   42.48   13.48
   2   1 -17   57.18   15.78
   2  -1 -17   45.38   13.74
   2  -1 -17  -10.97    8.12
   2  -1 -17   45.57   12.19
   2   1 -17   57.73   13.99
   2   1 -17   35.43   13.20
   2  -1 -17   71.05   16.57
   2   1 -17   46.73   15.72
   2  -1 -16  121.15   18.62
   2   1 -16  120.30   18.79
   2  -1 -16  106.22   18.29
   2   1 -16   94.25   15.57
   2  -1 -16   92.70   15.44
   2   1 -16  111.78   18.98
   2  -1 -16  118.57   18.09
   2  -1 -16   79.82   14.93
   2   1 -16  113.05   18.13
   2   1 -16  146.79   21.22
   2  -1 -16  158.10   20.88
   2   1 -15  192.49   22.19
   2  -1 -15  173.73   21.67
   2   1 -15  190.36   21.84
   2  -1 -15  208.33   23.74
   2   1 -15  205.75   23.50
   2  -1 -15  185.77   22.94
   2  -1 -15  190.24   21.48
   2   1 -15  200.09   22.44
   2  -1 -15  182.03   21.13
   2   1 -15  156.97   19.60
   2   1 -15  139.66   18.59
   2  -1 -15  146.27   18.84
   2   1 -15  229.67   24.96
   2  -1 -15  209.53   23.49
   2   1 -15  189.30   21.00
   2   1 -14   15.71   10.35
   2  -1 -14   13.19   10.12
   2  -1 -14    4.17    9.34
   2   1 -14    1.76    8.51
   2  -1 -14    1.23    9.78
   2  -1 -14    8.18    8.76
   2   1 -14   -2.21    9.92
   2   1 -14    2.54    6.70
   2  -1 -14   14.96   10.01
   2  -1 -14   -2.62    7.95
   2   1 -14    1.21   10.74
   2   1 -14    0.19    7.57
   2   1 -14   13.48   11.06
   2   1 -14    4.84    8.14
   2  -1 -14    7.47    9.67
   2   1 -13   22.59    8.25
   2  -1 -13   27.71   11.13
   2   1 -13   18.88    9.51
   2  -1 -13   17.77    9.76
   2   1 -13   12.03    8.23
   2  -1 -13   21.85    8.60
   2  -1 -13   16.07    7.81
   2  -1 -13   18.98    9.17
   2   1 -13   20.85    9.05
   2  -1 -13   13.67    8.81
   2   1 -13   17.83    9.41
   2   1 -13   26.39    9.72
   2  -1 -13   21.35    9.41
   2   1 -13   20.11    9.16
   2   1 -12   71.99   13.06
   2  -1 -12   83.27   13.57
   2  -1 -12   87.60   14.63
   2   1 -12   87.39   14.03
   2  -1 -12   73.33   11.95
   2  -1 -12   80.30   12.51
   2   1 -12   75.58   24.45
   2   1 -12   80.82   12.51
   2  -1 -12   46.59   10.39
   2   1 -12   70.82   12.50
   2  -1 -12   80.38   13.44
   2  -1 -12   84.50   13.80
   2   1 -12   74.37   12.92
   2   1 -12   78.30   12.78
   2   1 -11  396.34   49.13
   2   1 -11  392.83   43.77
   2  -1 -11  395.53   50.54
   2   1 -10   -1.23   12.36
   2   1 -10    0.53   15.95
   2  -1 -10   -1.31   16.60
   2   1  -9 1931.10  103.37
   2  -1  -9 2068.22  128.94
   2   1  -9 2094.46  110.94
   2  -1  -9 1781.22  100.50
   2  -1  -9 1845.13  110.25
   2   1  -9 1978.45  112.82
   2   1  -8  887.97   62.68
   2  -1  -8  932.27   63.57
   2  -1  -8  787.68   57.91
   2  -1  -8  875.50   76.44
   2   1  -8  879.27   60.62
   2  -1  -8  873.37   65.87
   2   1  -8  866.57   66.33
   2   1  -7  627.34   47.70
   2  -1  -7  666.76   62.47
   2  -1  -7  620.56   47.90
   2  -1  -7  617.83   48.25
   2   1  -7  642.36   48.47
   2  -1  -7  675.62   54.60
  -2   1   7  635.55   36.94
   2   1  -6  128.69   25.92
   2   1  -6  134.87   20.55
   2  -1  -6  129.00   21.45
   2  -1  -6  119.99   28.81
   2   1  -6  151.88   22.66
   2  -1  -6  137.08   20.95
  -2   1   6  152.03   16.60
  -2  -1   6  126.90   11.33
   2  -1  -6  126.00   24.17
   2   1  -5  854.07   52.16
   2  -1  -5  917.14   64.65
   2  -1  -5  934.61   54.30
   2  -1  -5  921.92   52.82
   2   1  -5  986.78   62.69
   2   1  -5  811.46   49.66
  -2   1   5  940.62   47.86
   2  -1  -5  903.92   58.09
  -2  -1   5  861.74   40.54
   2   1  -4   32.93   15.26
   2  -1  -4   28.68   10.61
  -2  -1   4   34.36    6.36
   2   1  -4   21.69   10.32
   2  -1  -4   41.55   11.09
   2   1  -4   28.49   12.85
   2  -1  -4   43.80   17.74
  -2  -1   4   34.84    8.18
   2   1  -4   33.69   14.20
  -2   1   4   33.55   10.19
   2   1  -3  567.61   38.76
   2  -1  -3  557.06   40.76
   2   1  -3  540.33   36.68
  -2   1   3  597.13   35.32
  -2  -1   3  575.28   30.89
   2   1  -2  848.33   45.30
   2  -1  -2  889.43   45.36
   2  -1  -2  831.90   47.31
   2   1  -2  885.28   32.76
   2   1  -2  850.14   43.59
  -2   1   2  909.64   45.57
  -2  -1   2  863.26   41.91
   2  -1  -1  509.00   28.98
   2  -1  -1  462.16   28.63
  -2   1   1  512.89   30.75
  -2  -1   1  458.62   28.22
   2   1  -1  466.88   24.69
   2  -1   0  346.42   21.56
   2  -1   0  360.08   21.90
   2  -1   0  348.18   19.35
  -2   1   0  341.01   24.24
  -2  -1   0  359.79   24.50
   2  -1   1  668.36   30.85
  -2  -1  -1  683.28   27.18
  -2   1  -1  689.54   29.27
  -2   1  -1  675.79   36.40
  -2  -1  -1  688.48   37.53
  -2  -1  -2 1877.02   80.95
  -2  -1  -2 1869.52   67.68
   2  -1   2 1779.69   64.48
  -2   1  -2 1951.65   72.20
  -2  -1  -2 1523.82   73.43
  -2   1  -2 1535.24   71.69
  -2  -1  -3  277.87   27.55
  -2  -1  -3  310.70   23.20
  -2   1  -3  365.30   25.06
  -2   1  -3  364.46   27.65
  -2  -1  -4  286.60   28.75
  -2  -1  -4  306.58   25.74
  -2   1  -4  302.10   29.53
  -2   1  -4  286.33   23.05
  -2  -1  -5  406.04   33.25
  -2  -1  -5  376.35   35.23
  -2   1  -5  346.02   30.61
  -2   1  -5  381.09   27.88
  -2   1  -6  555.47   42.17
  -2  -1  -6  545.88   44.75
  -2  -1  -6  596.90   44.54
  -2   1  -6  544.78   42.43
  -2  -1  -7  225.84   30.55
  -2   1  -7  146.58   24.64
  -2   1  -7  164.30   24.41
  -2  -1  -7  152.36   25.29
  -2   1  -8  194.88   27.38
  -2  -1  -8  232.97   32.08
  -2   1  -8  244.82   32.48
  -2  -1  -8  289.98   35.29
  -2   1  -9 1719.38  103.45
  -2  -1  -9 1879.49  106.33
  -2   1  -9 1979.07  103.08
  -2   1 -10  359.33   44.71
  -2   1 -10  462.20   56.58
  -2  -1 -10  509.43   57.54
  -2   1 -11  690.56   66.23
  -2   1 -11  747.91   76.10
  -2  -1 -11  741.46   74.53
  -2   1 -12 1143.33   56.74
  -2   1 -12  983.00   86.11
  -2  -1 -12 1146.51   56.55
  -2  -1 -12 1105.71   56.56
  -2  -1 -12 1044.42   54.17
  -2   1 -12 1093.40   55.17
  -2  -1 -12 1314.43  102.86
  -2  -1 -12  965.54   49.77
  -2   1 -12 1104.14   54.68
  -2  -1 -12 1030.14   52.55
  -2   1 -12 1185.57   98.98
  -2   1 -12 1025.01   51.98
  -2  -1 -13  460.80   32.07
  -2   1 -13  456.42   29.31
  -2   1 -13  420.42   31.62
  -2  -1 -13  423.37   31.62
  -2  -1 -13  262.86   33.26
  -2  -1 -13  409.38   31.28
  -2   1 -13  430.72   32.03
  -2  -1 -13  442.82   32.03
  -2   1 -13  483.13   64.51
  -2   1 -13  409.39   30.25
  -2  -1 -13  407.23   27.73
  -2  -1 -13  442.57   60.52
  -2  -1 -13  423.80   29.99
  -2   1 -13  373.57   27.99
  -2  -1 -14   51.42   11.72
  -2   1 -14   91.62   14.81
  -2  -1 -14   95.50   16.42
  -2   1 -14  102.53   17.32
  -2  -1 -14   46.64   25.36
  -2  -1 -14  108.49   16.99
  -2  -1 -14   70.49   13.60
  -2   1 -14   83.31   14.68
  -2  -1 -14   64.47   11.36
  -2  -1 -14  132.30   37.62
  -2   1 -14   88.80   13.51
  -2  -1 -14   82.28   13.88
  -2   1 -14   87.91   35.78
  -2  -1 -15  375.15   30.28
  -2   1 -15  527.69   35.28
  -2  -1 -15  512.97   35.54
  -2  -1 -15  380.15   30.93
  -2   1 -15  508.47   37.17
  -2  -1 -15  504.68   37.02
  -2  -1 -15  493.98   33.30
  -2   1 -15  476.34   34.07
  -2   1 -15  504.91   32.25
  -2  -1 -16  374.59   28.43
  -2  -1 -16  342.07   30.70
  -2   1 -16  325.10   30.39
  -2  -1 -16  336.31   27.66
  -2   1 -16  343.55   28.08
  -2  -1 -16  370.95   29.79
  -2  -1 -17   20.20   13.00
  -2   1 -17   24.90   13.17
  -2   1 -17   25.60   10.73
  -2  -1 -17   27.10   12.54
  -2   1 -18   25.96   13.71
  -2  -1 -18    3.34   11.11
  -2  -1 -18   15.05   10.38
  -2   1 -18    1.66    7.85
  -2   1 -19   20.13   11.92
  -2  -1 -19    5.46    9.38
  -2  -1 -19   -4.52    7.54
  -2  -1 -19   -2.89    9.79
  -2   1 -19    4.30    9.44
  -2   1 -19    5.05    7.10
  -2  -1 -19    0.79    7.97
  -2  -1 -20   18.33    8.44
  -2   1 -20   -2.93    7.51
  -2  -1 -20   -0.02    6.81
  -2  -1 -20    2.79    5.25
  -2   1 -20    0.49    6.07
  -2  -1 -20    8.36    7.18
  -2   1 -20    1.60    5.38
  -2   1 -21    7.91    5.12
  -2  -1 -21   11.59    5.32
  -2  -1 -21   11.14    5.00
   2   2 -20   95.62   11.92
   2   2 -20   99.67   12.13
   2   2 -20   93.03   11.96
   2   2 -19  276.69   22.77
   2  -2 -19  276.43   23.14
   2  -2 -19  291.12   24.23
   2   2 -19  285.16   22.87
   2  -2 -19  283.22   20.81
   2  -2 -19  267.96   21.69
   2   2 -19  287.47   23.40
   2   2 -19  303.50   24.10
   2  -2 -18   94.86   16.72
   2   2 -18   83.59   15.21
   2   2 -18   87.36   16.43
   2   2 -18   83.88   15.50
   2  -2 -18   84.14   15.81
   2  -2 -18   97.88   14.08
   2  -2 -18   91.64   15.48
   2   2 -18  118.82   18.85
   2  -2 -18   73.46   13.16
   2  -2 -18  111.10   17.62
   2   2 -17  547.49   35.88
   2  -2 -17  485.78   34.20
   2   2 -17  562.28   36.61
   2  -2 -17  496.73   32.89
   2   2 -17  543.16   35.34
   2  -2 -17  536.72   32.91
   2  -2 -17  497.36   35.16
   2  -2 -17  370.77   29.81
   2  -2 -17  197.35   32.64
   2  -2 -17  201.00   19.70
   2   2 -17  542.84   35.84
   2  -2 -17  529.39   34.82
   2  -2 -16  267.98   25.91
   2   2 -16  269.67   26.07
   2  -2 -16  262.04   26.34
   2   2 -16  273.96   27.45
   2   2 -16  244.25   24.42
   2  -2 -16  191.60   20.78
   2  -2 -16  255.38   24.29
   2   2 -16  202.34   21.59
   2  -2 -16  201.33   21.65
   2  -2 -16  249.50   25.04
   2   2 -16  276.75   26.35
   2   2 -15  530.10   37.02
   2   2 -15  374.07   31.50
   2  -2 -15  567.00   38.11
   2  -2 -15  526.38   38.20
   2  -2 -15  518.07   35.51
   2  -2 -15  495.41   36.68
   2  -2 -15  431.42   32.26
   2   2 -15  518.03   36.49
   2   2 -15  415.53   33.11
   2   2 -15  550.35   37.97
   2  -2 -15  368.21   31.38
   2   2 -15  580.10   38.46
   2   2 -15  502.61   34.95
   2  -2 -15  522.86   36.15
   2   2 -14  214.44   22.13
   2  -2 -14  225.40   24.42
   2   2 -14  247.86   24.26
   2  -2 -14  204.31   22.50
   2  -2 -14  222.06   23.28
   2  -2 -14  235.28   22.99
   2   2 -14  187.71   21.65
   2   2 -14  175.56   20.19
   2   2 -14  186.86   20.74
   2  -2 -14  204.82   21.33
   2   2 -14  222.97   23.70
   2  -2 -14  138.52   18.28
   2  -2 -14  207.09   22.24
   2   2 -14  236.57   23.01
   2   2 -14  234.53   24.24
   2   2 -13  313.43   26.63
   2  -2 -13  311.40   26.77
   2  -2 -13  326.96   28.32
   2  -2 -13  361.66   29.33
   2   2 -13  324.48   27.01
   2  -2 -13  294.63   25.66
   2  -2 -13  342.09   27.12
   2   2 -13  308.16   25.88
   2   2 -13  314.71   26.08
   2  -2 -13  273.30   24.40
   2   2 -13  292.77   24.96
   2   2 -13  336.52   27.52
   2  -2 -13  347.55   27.23
   2   2 -13  334.53   51.64
   2  -2 -12  292.11   24.30
   2  -2 -12  276.94   24.63
   2   2 -12  242.19   22.44
   2   2 -12  255.11   22.92
   2   2 -12  283.46   23.28
   2   2 -12  229.22   41.13
   2  -2 -12  262.07   22.67
   2   2 -12  195.34   33.52
   2   2 -12  239.11   22.23
   2  -2 -12  272.73   23.01
   2  -2 -12  304.87   25.69
   2   2 -12  287.69   23.69
   2  -2 -12  292.82   23.82
   2   2 -12  255.84   23.10
   2  -2 -12  256.52   22.19
   2   2 -11  289.01   38.67
   2   2 -11  306.00   43.85
   2  -2 -11  228.17   39.00
   2   2 -10  118.68   26.95
   2  -2 -10   70.98   28.57
   2   2 -10  106.08   23.13
   2  -2 -10  118.45   26.85
   2  -2  -9   14.12   21.13
   2   2  -9    4.28   11.47
   2   2  -9    4.28   15.95
   2  -2  -9    6.61   16.00
   2  -2  -8   49.06   25.96
   2   2  -8   66.10   19.03
   2   2  -8   33.43   15.62
  -2   2   8   42.35   11.56
   2  -2  -8   73.26   22.18
   2   2  -7    6.06   12.69
   2   2  -7    8.76   12.75
   2  -2  -7   -5.05   24.87
   2  -2  -7    8.29   15.20
  -2   2   7   15.13   10.19
   2  -2  -6  147.42   23.57
   2   2  -6  155.39   23.22
   2  -2  -6  126.22   31.12
   2  -2  -6  135.92   31.41
   2  -2  -6  138.13   25.64
   2   2  -6  130.80   27.38
  -2   2   6  144.00   19.42
   2  -2  -5   45.21   15.48
   2   2  -5   29.38   13.49
   2  -2  -5   30.49   20.59
   2   2  -5   31.74   12.42
   2   2  -5   46.74   17.50
  -2   2   5   41.83   13.17
   2  -2  -5   51.59   18.06
   2  -2  -4 1555.32   74.95
  -2  -2   4 1535.44   58.66
   2   2  -4 1456.04   71.13
   2  -2  -4 1515.67   84.36
  -2   2   4 1679.13   76.22
   2   2  -4 1411.15   78.10
  -2  -2   3 1382.51   58.91
   2   2  -3 1430.10   64.91
   2  -2  -3 1480.80   75.73
   2   2  -3 1335.85   53.61
  -2   2   3 1578.18   71.23
  -2  -2   3 1394.06   59.68
  -2   2   3 1363.90   54.99
   2   2  -3 1342.98   68.53
  -2  -2   2 2486.71  100.42
   2  -2  -2 2540.81  108.89
   2   2  -2 2489.54  103.86
  -2  -2   2 2596.62  100.11
  -2   2   2 2606.94   94.87
  -2   2   2 2823.80  109.54
  -2  -2   1  530.93   33.90
   2  -2  -1  550.43   34.29
  -2   2   1  600.99   36.74
  -2  -2   1  542.22   32.55
  -2  -2   0 4942.92  183.12
  -2   2   0 4956.29  181.07
  -2  -2  -1  435.59   32.41
  -2   2  -1  357.79   26.28
  -2  -2  -2    3.99   12.52
  -2  -2  -2    8.57    6.97
  -2   2  -2    4.80    8.17
  -2   2  -2    5.92    7.94
  -2  -2  -3 2167.84   99.03
  -2  -2  -3 2010.95   89.41
  -2   2  -3 2251.65   94.02
  -2   2  -3 2254.79   89.09
  -2  -2  -4 1043.46   61.63
  -2  -2  -4  942.39   54.40
  -2   2  -4 1041.79   59.13
  -2   2  -4 1054.33   50.45
  -2   2  -5  158.69    9.42
  -2  -2  -5  140.06   23.82
  -2  -2  -5  145.15   23.05
  -2   2  -5  158.96   24.59
  -2   2  -5  155.66   17.07
  -2  -2  -6 1358.70   78.79
  -2   2  -6 1297.67   80.91
  -2   2  -7  227.70   27.99
  -2   2  -7  193.32   27.72
  -2  -2  -7  230.44   32.10
  -2   2  -8    0.80    8.73
  -2   2  -8   -0.67   13.39
  -2  -2  -8   12.17   14.82
  -2  -2  -9  248.93   35.76
  -2   2  -9  306.45   38.65
  -2   2  -9  306.76   43.45
  -2  -2 -10   37.42   16.82
  -2   2 -10   48.76   20.93
  -2   2 -10   41.45   21.52
  -2  -2 -10   46.55   23.47
  -2   2 -11  106.73   28.36
  -2   2 -11  142.09   36.57
  -2  -2 -11   69.95   27.70
  -2  -2 -12  486.69   33.36
  -2   2 -12  463.89   57.00
  -2   2 -12  464.53   31.97
  -2  -2 -12  437.82   31.22
  -2  -2 -12  452.62   32.24
  -2  -2 -12  411.38   35.65
  -2   2 -12  438.48   31.72
  -2  -2 -12  402.71   30.38
  -2  -2 -12  494.97   33.85
  -2   2 -12  455.99   59.87
  -2   2 -12  470.86   32.39
  -2  -2 -12  487.20   61.60
  -2   2 -12  419.63   29.83
  -2  -2 -12  402.17   28.92
  -2  -2 -13   42.03   11.21
  -2  -2 -13   42.22   11.33
  -2   2 -13   42.27    9.83
  -2   2 -13   44.72   23.29
  -2   2 -13   33.05   10.00
  -2   2 -13   44.88   11.49
  -2  -2 -13   32.79   11.10
  -2  -2 -13   50.19   27.00
  -2  -2 -13   70.41   13.34
  -2  -2 -13   27.35    8.48
  -2  -2 -13   40.91   22.83
  -2   2 -13   35.67   11.70
  -2   2 -13   41.60   10.78
  -2   2 -13   36.55   19.05
  -2  -2 -14   39.90   11.25
  -2   2 -14   39.56    9.64
  -2   2 -14   35.43   11.48
  -2  -2 -14   51.04   13.10
  -2  -2 -14   44.98   11.59
  -2  -2 -14    7.36   27.34
  -2  -2 -14   45.82   12.94
  -2   2 -14   50.14   13.42
  -2   2 -14   24.46   18.57
  -2  -2 -14   55.79   11.93
  -2  -2 -14  101.60   33.87
  -2   2 -14   53.96   13.12
  -2   2 -14   60.89   12.51
  -2  -2 -15   48.30   11.98
  -2  -2 -15   45.56   12.70
  -2   2 -15   44.54   12.07
  -2   2 -15   45.29   14.69
  -2  -2 -15   50.11   14.43
  -2  -2 -15   32.36   10.17
  -2   2 -15   50.94   11.81
  -2   2 -15   53.36   12.93
  -2  -2 -16  109.32   16.03
  -2   2 -16   95.29   17.99
  -2  -2 -16   71.09   15.43
  -2  -2 -16   94.35   16.51
  -2   2 -16   92.53   15.20
  -2  -2 -17  246.61   25.85
  -2   2 -17  269.55   27.96
  -2  -2 -17  267.66   24.51
  -2   2 -17  233.12   21.96
  -2  -2 -18  157.42   20.32
  -2   2 -18  184.23   22.22
  -2  -2 -18  177.47   19.83
  -2   2 -18  145.07   16.72
  -2   2 -19  197.52   19.36
  -2  -2 -19  192.96   17.25
  -2  -2 -19  214.49   19.71
  -2  -2 -19  220.04   20.99
  -2   2 -19  191.17   17.17
  -2  -2 -19  234.45   20.34
  -2   2 -20  176.37   15.59
  -2  -2 -20  168.56   16.17
  -2  -2 -20  136.89   12.15
  -2  -2 -20  148.14   14.77
  -2   2 -20  161.39   15.22
  -2  -2 -20  177.10   15.60
  -2   2 -20  145.05   12.82
  -2  -2 -21  175.94   13.00
  -2   2 -21  178.03   13.11
  -2  -2 -21  190.38   13.45
   2   3 -20  142.38   13.97
   2   3 -20  150.33   14.59
   2   3 -20  163.96   15.01
   2   3 -19   30.58    9.22
   2   3 -19   16.40    8.29
   2  -3 -19   28.67   10.27
   2   3 -19   25.00   10.42
   2  -3 -19   38.25    8.72
   2  -3 -19   37.65    8.46
   2  -3 -18  131.88   18.13
   2   3 -18  127.08   17.47
   2  -3 -18   80.39   13.56
   2  -3 -18  292.78   14.82
   2  -3 -18  107.67   17.47
   2   3 -18  124.20   17.77
   2  -3 -18  125.08   17.04
   2  -3 -18  267.86   28.04
   2   3 -18  119.97   18.20
   2   3 -18  130.44   18.73
   2  -3 -18   96.17   13.59
   2  -3 -18  119.14   17.43
   2   3 -17   11.44   10.72
   2  -3 -17   19.28   11.56
   2  -3 -17    6.68    7.13
   2   3 -17   14.76   12.11
   2  -3 -17    8.14   11.67
   2  -3 -17   14.54    8.49
   2   3 -17   18.09   12.93
   2  -3 -17   16.08   10.18
   2  -3 -17   28.31    7.88
   2  -3 -17   21.18   11.37
   2  -3 -16    6.19   10.53
   2   3 -16    5.61   10.21
   2  -3 -16   -1.82    7.64
   2  -3 -16   23.23   13.49
   2   3 -16   20.56   13.00
   2   3 -16   10.57   12.20
   2  -3 -16    4.98    7.12
   2  -3 -16  -25.76    8.66
   2  -3 -16    3.22   10.63
   2   3 -16    8.30   10.91
   2  -3 -16    5.58   10.69
   2   3 -16   -2.45    9.92
   2  -3 -15    9.79    9.68
   2   3 -15   -1.40    9.08
   2   3 -15  -11.07   13.59
   2   3 -15   16.15   10.52
   2   3 -15   -9.10   13.25
   2  -3 -15    2.07    8.00
   2  -3 -15   -5.05   10.62
   2  -3 -15    0.27    7.54
   2  -3 -15    3.79    9.64
   2  -3 -15   -8.98   10.48
   2   3 -15   14.64   10.84
   2   3 -15    9.49   10.45
   2  -3 -14  422.02   33.24
   2   3 -14  294.93   26.68
   2  -3 -14  423.15   32.16
   2  -3 -14  400.82   31.74
   2   3 -14  486.89   34.55
   2  -3 -14  401.06   30.35
   2   3 -14  387.87   30.22
   2   3 -14  456.90   33.80
   2  -3 -14  289.48   25.93
   2  -3 -14  299.60   27.04
   2   3 -14  403.59   60.56
   2   3 -14  402.31   30.73
   2   3 -14  445.58   32.20
   2  -3 -14  426.36   31.01
   2  -3 -13   -2.90    9.07
   2   3 -13    3.94    7.27
   2  -3 -13    3.16    8.68
   2   3 -13   12.73    9.01
   2  -3 -13   -9.38    8.50
   2   3 -13   -3.74    9.11
   2  -3 -13  -21.76    9.77
   2  -3 -13   -3.19    8.44
   2  -3 -13   -6.41    7.67
   2   3 -13   -7.65    7.50
   2   3 -13   -0.44    7.95
   2   3 -13    7.23    8.56
   2  -3 -13    1.38    7.91
   2   3 -13   -6.85   17.14
   2  -3 -12  775.02   44.73
   2   3 -12  681.52   41.07
   2  -3 -12  713.93   42.24
   2   3 -12  837.34   43.70
   2   3 -12  632.94   61.63
   2   3 -12  708.65   74.09
   2   3 -12  736.88   41.62
   2  -3 -12  732.31   41.29
   2   3 -12  778.17   42.40
   2   3 -12  719.37   41.98
   2  -3 -12  716.27   41.35
   2  -3 -12  791.59   45.98
   2  -3 -12  748.44   41.54
   2   3 -12  655.02   41.03
   2  -3 -12  701.29   40.54
   2  -3 -12  714.91   42.52
   2  -3 -11  -16.85   28.96
   2   3 -11   -7.16   12.89
   2   3 -11    5.41    6.54
   2   3 -11    4.43   15.40
   2  -3 -11    7.37    6.22
   2  -3 -11   -3.48    7.48
   2  -3 -11   13.90   17.42
   2   3 -10  810.25   64.40
   2   3 -10  854.08   71.93
   2  -3 -10  762.65   81.89
   2  -3 -10  798.93   69.36
   2   3  -9  295.76   36.95
   2   3  -9  385.68   44.28
   2  -3  -9  322.93   51.76
   2  -3  -9  338.93   42.63
   2   3  -8 3553.21  160.91
   2  -3  -8 3577.28  189.55
   2   3  -8 3648.63  167.72
   2  -3  -8 3538.75  166.59
  -2   3   8 3843.34  155.76
   2   3  -7  148.98   24.83
   2  -3  -7  182.57   39.33
   2  -3  -7  148.97   36.05
  -2   3   7  153.19   23.03
   2  -3  -7  148.39   26.76
   2   3  -7  177.93   34.83
   2  -3  -6 2349.54  129.58
   2   3  -6 2480.58  109.56
   2  -3  -6 2272.63  114.43
  -2   3   6 2439.14  111.09
   2   3  -6 2370.50  125.29
   2  -3  -5  253.75   37.30
   2   3  -5  242.40   25.61
   2  -3  -5  270.98   30.33
   2   3  -5  234.41   33.04
  -2  -3   4  285.43   18.64
   2  -3  -4  266.09   34.95
   2   3  -4  298.18   26.44
   2   3  -4  252.96   30.97
  -2  -3   3 1749.11   73.95
   2  -3  -3 1773.16   90.02
   2   3  -3 1754.37   78.05
   2   3  -3 1715.51   85.69
  -2   3   3 1663.81   71.62
   2   3  -3 1762.40   71.30
  -2  -3   2 3353.32  131.90
   2  -3  -2 3276.52  139.37
  -2   3   2 3322.64  125.84
  -2   3   2 3637.18  141.37
  -2  -3   1   10.16   10.65
   2  -3  -1   12.75   12.71
  -2   3   1    8.35   13.54
  -2   3   1   11.62    8.74
  -2  -3   0  403.29   32.77
  -2   3   0  389.43   31.12
  -2  -3  -1 1016.16   55.62
  -2   3  -1  755.45   44.80
  -2  -3  -2  150.54   23.08
  -2   3  -2  146.97   17.75
  -2  -3  -3  166.91   25.64
  -2  -3  -3  202.02   22.94
  -2   3  -3  209.02   24.25
  -2   3  -3  191.84   19.45
  -2  -3  -4 1209.86   71.67
  -2  -3  -4 1226.98   67.82
  -2   3  -4 1251.92   69.71
  -2   3  -4 1276.34   59.26
  -2  -3  -5   41.98   17.36
  -2  -3  -5   50.11   16.27
  -2   3  -5   35.58   16.93
  -2   3  -5   31.82    8.94
  -2   3  -6 2214.80   83.35
  -2  -3  -6 2230.01  114.18
  -2  -3  -6 2092.14  111.05
  -2   3  -6 2293.45   93.37
  -2   3  -6 2333.86  118.66
  -2  -3  -7   68.23   19.93
  -2  -3  -7   41.25   18.49
  -2   3  -7   62.95   23.80
  -2  -3  -8 2343.57  120.60
  -2   3  -8 2225.68  113.88
  -2  -3  -9   25.66   16.57
  -2   3  -9   13.49   15.43
  -2   3  -9    6.92   15.51
  -2   3 -10 1743.25  113.68
  -2  -3 -10 2033.88  118.33
  -2   3 -10 2153.90  124.60
  -2  -3 -10 1817.77  117.48
  -2  -3 -11    8.51    6.81
  -2   3 -11   19.02   14.15
  -2  -3 -11    5.88    6.64
  -2   3 -11    0.62    7.20
  -2  -3 -11    4.44    6.73
  -2   3 -11   10.78    6.84
  -2  -3 -11   11.35   19.67
  -2   3 -11   -9.84   17.29
  -2  -3 -12 2006.97   85.12
  -2   3 -12 1811.69   77.90
  -2  -3 -12 1787.60   80.46
  -2   3 -12 1847.16  125.20
  -2   3 -12 1829.40   80.23
  -2  -3 -12 2022.75   84.68
  -2  -3 -12 1995.21   85.69
  -2  -3 -12 1720.43   82.08
  -2  -3 -12 1750.33   81.04
  -2   3 -12 1767.23   81.83
  -2  -3 -12 1720.36   78.18
  -2   3 -12 1962.47   84.43
  -2  -3 -12 1853.73  126.51
  -2   3 -12 1787.60   81.11
  -2   3 -12 2034.23  129.66
  -2  -3 -13    5.45    7.35
  -2  -3 -13    6.83    8.30
  -2   3 -13    6.75    9.45
  -2   3 -13    8.74    7.40
  -2   3 -13    7.53   16.18
  -2  -3 -13    5.35    8.58
  -2  -3 -13   42.33   27.93
  -2   3 -13    4.64    8.55
  -2  -3 -13    6.21    7.50
  -2  -3 -13    3.67   18.35
  -2  -3 -13    5.28    6.68
  -2   3 -13   -1.12    8.07
  -2   3 -13    7.19    8.30
  -2   3 -13   12.94   16.02
  -2  -3 -14  292.06   27.04
  -2   3 -14  320.29   25.46
  -2   3 -14  398.44   58.99
  -2   3 -14  382.56   28.66
  -2  -3 -14  392.14   29.95
  -2  -3 -14  413.34   31.69
  -2   3 -14  401.90   32.02
  -2  -3 -14  303.68   27.78
  -2   3 -14  401.38   31.22
  -2   3 -14  381.97   28.88
  -2  -3 -14  454.48   62.52
  -2  -3 -14  272.86   24.47
  -2   3 -14  401.05   57.52
  -2  -3 -15    0.74    8.20
  -2  -3 -15    9.13   10.14
  -2   3 -15    7.42    8.61
  -2   3 -15    8.24    6.92
  -2   3 -15    6.84   12.06
  -2  -3 -15   19.38    9.42
  -2  -3 -15    1.11   10.70
  -2   3 -15    3.88    8.39
  -2   3 -15   17.16   11.40
  -2   3 -16    9.95   12.75
  -2  -3 -16    3.51   10.98
  -2   3 -16    1.86    7.95
  -2  -3 -16    5.25    9.76
  -2   3 -17   59.00   16.25
  -2  -3 -17   54.21   15.28
  -2  -3 -17   55.58   13.57
  -2   3 -17   51.93   10.95
  -2  -3 -18  139.24   17.93
  -2   3 -18  161.03   18.22
  -2  -3 -18  157.01   20.07
  -2   3 -18  159.92   16.36
  -2  -3 -18  137.65   18.19
  -2  -3 -19   -6.45    5.93
  -2  -3 -19    3.31    8.75
  -2   3 -19   -8.53    9.14
  -2  -3 -19    1.42    8.36
  -2   3 -19    6.92    6.04
  -2  -3 -19   -5.78    8.61
  -2  -3 -20   46.70   10.00
  -2  -3 -20   16.70    6.94
  -2   3 -20   21.99    7.65
  -2   3 -20   18.09    6.98
  -2   3 -20   22.19    6.17
  -2  -3 -20   28.77    8.42
  -2  -3 -21    5.30    4.60
   2   4 -20   57.45    9.06
   2   4 -20   64.37    9.87
   2   4 -20   65.22   10.43
   2   4 -19  370.07   25.49
   2   4 -19  409.37   26.92
   2   4 -19  342.19   25.04
   2  -4 -18  149.36   19.05
   2   4 -18  139.36   17.97
   2   4 -18  156.29   19.21
   2  -4 -18  147.08   17.41
   2   4 -18  161.18   20.56
   2  -4 -18  135.70   18.85
   2  -4 -18  109.51   15.02
   2   4 -18  156.01   19.46
   2  -4 -18  143.02   17.55
   2  -4 -17  645.25   40.89
   2   4 -17  669.08   41.16
   2  -4 -17  671.27   38.81
   2   4 -17  709.93   42.16
   2  -4 -17  453.49   27.56
   2  -4 -17  637.43   36.10
   2   4 -17  745.60   44.54
   2  -4 -17  641.60   41.09
   2  -4 -17  549.21   36.55
   2   4 -17  717.30   41.01
   2  -4 -17  629.67   37.82
   2   4 -16  132.04   18.95
   2  -4 -16  119.16   18.69
   2  -4 -16  101.61   18.83
   2   4 -16  154.99   21.10
   2   4 -16  121.63   20.01
   2  -4 -16   67.83   13.99
   2  -4 -16  118.02   16.88
   2  -4 -16   67.61   11.82
   2  -4 -16  139.05   16.56
   2  -4 -16  135.34   18.31
   2   4 -16  159.17   20.52
   2   4 -15  436.40   33.12
   2  -4 -15  400.34   31.97
   2  -4 -15  385.43   32.06
   2  -4 -15  318.37   26.12
   2   4 -15  489.71   35.91
   2  -4 -15  432.77   31.16
   2   4 -15  482.79   34.59
   2  -4 -15  190.29   19.99
   2  -4 -15  329.25   28.07
   2   4 -15  487.64   33.56
   2   4 -15  449.52   31.68
   2  -4 -15  421.49   30.78
   2  -4 -14   56.99   13.95
   2   4 -14   41.11   10.31
   2  -4 -14   61.61   15.06
   2   4 -14   49.77   14.62
   2  -4 -14   39.86   10.86
   2  -4 -14   60.66   14.73
   2   4 -14   73.09   15.60
   2  -4 -14   59.74   13.06
   2  -4 -14   44.41   10.71
   2   4 -14   52.42   12.28
   2  -4 -14   52.30   12.18
   2   4 -14   79.80   15.42
   2   4 -14   78.64   28.23
   2   4 -13  323.48   26.90
   2  -4 -13  425.75   31.40
   2  -4 -13  437.16   33.11
   2  -4 -13  437.82   32.60
   2   4 -13  433.83   31.19
   2  -4 -13  318.89   26.15
   2  -4 -13  402.99   29.78
   2   4 -13  400.55   31.89
   2   4 -13  436.71   31.60
   2  -4 -13  286.79   25.90
   2   4 -13  489.10   32.70
   2  -4 -13  398.65   29.49
   2   4 -13  430.52   59.50
   2   4 -13  432.00   30.27
   2  -4 -12   87.89   14.24
   2  -4 -12   81.14   14.76
   2   4 -12   97.59   14.46
   2   4 -12   82.23   13.33
   2  -4 -12   89.71   13.72
   2   4 -12   92.31   14.58
   2   4 -12   95.41   24.80
   2   4 -12   92.29   29.82
   2  -4 -12   81.02   14.27
   2   4 -12   95.59   15.35
   2  -4 -12   84.83   13.21
   2   4 -12  103.80   15.16
   2  -4 -12   97.62   14.59
   2   4 -12   85.94   14.46
   2  -4 -12   82.92   12.96
   2  -4 -11  648.40   38.04
   2  -4 -11  645.48   39.15
   2   4 -11  608.62   58.84
   2   4 -11  669.34   37.90
   2   4 -11  710.70   69.97
   2  -4 -11  556.69   34.64
   2  -4 -11  642.01   80.43
   2  -4 -11  636.18   38.33
   2   4 -11  600.20   36.05
   2  -4 -11  607.92   36.17
   2  -4 -11  703.75   41.74
   2  -4 -11  676.33   66.29
   2   4 -10   44.41   21.47
   2  -4 -10   61.27   30.49
   2   4 -10   40.15   16.62
   2  -4 -10   50.46   21.79
   2   4  -9  129.14   28.75
   2   4  -9   75.71   21.69
   2  -4  -9  140.00   37.97
   2  -4  -9  127.93   28.11
   2  -4  -8   89.55   35.13
   2   4  -8   95.39   21.81
   2  -4  -8   66.59   31.13
   2   4  -8  109.10   33.43
   2  -4  -8   86.86   22.43
  -2   4   8   88.85   20.53
   2  -4  -7   72.30   27.86
   2  -4  -7   57.46   19.79
   2   4  -7   97.63   30.42
   2   4  -6  447.02   36.96
   2  -4  -6  454.41   54.42
   2  -4  -6  442.77   41.66
   2   4  -6  449.40   50.97
   2   4  -5  718.19   46.35
   2  -4  -5  709.02   62.20
   2  -4  -5  690.96   50.25
   2   4  -5  746.86   60.09
  -2  -4   4  373.43   24.92
   2   4  -4  367.40   30.90
   2  -4  -4  373.72   42.93
   2   4  -4  377.21   40.02
   2   4  -4  356.04   27.09
  -2  -4   3 2812.96  114.32
   2  -4  -3 2906.74  133.12
  -2   4   3 2727.53  113.37
   2   4  -3 2948.07  130.60
   2   4  -3 2865.90  112.89
  -2  -4   2  172.61   21.64
   2  -4  -2  165.81   26.19
  -2   4   2  157.38   18.78
  -2  -4   1  605.69   42.90
  -2   4   1  607.50   38.17
  -2  -4   0 1424.44   74.80
  -2   4   0 1361.63   66.70
  -2   4   0 1377.60   71.65
  -2  -4  -1  574.70   45.13
  -2   4  -1  577.69   39.58
  -2  -4  -2  203.76   16.32
  -2  -4  -2  199.02   28.84
  -2   4  -2  217.54   22.91
  -2  -4  -3 1578.42   87.10
  -2  -4  -3 1591.90   71.13
  -2  -4  -3 1643.75   81.92
  -2   4  -3 1648.48   74.60
  -2  -4  -4   36.58   20.87
  -2  -4  -4   26.43   11.78
  -2  -4  -4   24.65   15.82
  -2   4  -4   34.56   10.17
  -2   4  -4   30.91   16.29
  -2  -4  -5  576.72   50.82
  -2  -4  -5  591.83   44.22
  -2  -4  -5  545.34   47.49
  -2   4  -5  596.58   36.60
  -2   4  -5  620.19   52.04
  -2  -4  -6   23.87   19.36
  -2  -4  -6    8.20   15.29
  -2   4  -6   16.01    7.03
  -2   4  -6    8.60   17.51
  -2  -4  -7  135.08   27.97
  -2  -4  -7  106.72   25.88
  -2   4  -7  111.20   28.99
  -2  -4  -8  102.01   25.66
  -2  -4  -8   78.02   26.23
  -2   4  -8  119.46   24.33
  -2   4  -8   93.10   29.01
  -2   4  -9  220.93   35.91
  -2  -4  -9  167.00   33.12
  -2   4  -9  231.16   34.77
  -2  -4 -10  367.57   48.12
  -2   4 -10  381.94   49.57
  -2   4 -10  477.37   51.55
  -2  -4 -10  422.78   51.70
  -2  -4 -11   45.35   10.00
  -2   4 -11   40.23   19.97
  -2   4 -11   52.01   11.69
  -2  -4 -11   45.83   10.69
  -2  -4 -11   47.02   10.52
  -2   4 -11   65.20   13.29
  -2  -4 -11   44.94   19.86
  -2   4 -11   71.67   24.03
  -2   4 -11   62.74   13.01
  -2  -4 -12   78.11   14.95
  -2   4 -12   69.70   11.68
  -2  -4 -12   65.55   12.73
  -2   4 -12   57.15   24.76
  -2   4 -12   61.59   11.90
  -2   4 -12   79.03   14.96
  -2  -4 -12   65.05   13.08
  -2  -4 -12   73.80   14.18
  -2  -4 -12   61.49   13.79
  -2  -4 -12   68.26   11.88
  -2  -4 -12   63.17   23.14
  -2   4 -12   95.93   28.88
  -2   4 -12   67.81   13.87
  -2   4 -12   66.59   13.43
  -2  -4 -13  257.17   25.62
  -2   4 -13  245.23   22.35
  -2   4 -13  317.84   24.57
  -2   4 -13  327.70   52.85
  -2  -4 -13  296.78   25.67
  -2  -4 -13  361.77   39.86
  -2  -4 -13  236.89   25.03
  -2   4 -13  338.15   28.61
  -2  -4 -13  334.59   27.86
  -2  -4 -13  342.07   52.97
  -2   4 -13  307.63   26.85
  -2   4 -13  384.04   52.97
  -2  -4 -13  311.81   24.26
  -2   4 -13  378.76   30.42
  -2   4 -14    5.61    6.97
  -2   4 -14    7.32    6.36
  -2   4 -14   -8.32   18.72
  -2  -4 -14   25.69   10.73
  -2   4 -14   14.65   11.50
  -2  -4 -14   12.83    8.83
  -2  -4 -14   10.29    9.79
  -2   4 -14    8.12   28.02
  -2   4 -14    7.58   10.24
  -2   4 -14   24.87   12.23
  -2  -4 -14   15.51    7.89
  -2   4 -15  282.10   24.04
  -2   4 -15  306.91   24.94
  -2  -4 -15  345.00   28.00
  -2  -4 -15  344.43   30.08
  -2   4 -15  360.33   31.69
  -2   4 -15  359.06   30.44
  -2   4 -15  352.28   28.40
  -2   4 -16    9.38   13.01
  -2  -4 -16   -4.78   12.33
  -2   4 -16    8.69    7.91
  -2  -4 -16    0.54    9.52
  -2  -4 -17  424.36   33.70
  -2   4 -17  464.01   29.53
  -2  -4 -17  474.30   32.65
  -2  -4 -18   41.57   11.49
  -2  -4 -18   66.50   14.67
  -2   4 -18   38.97   11.27
  -2   4 -18   54.69   10.02
  -2  -4 -18   53.53   12.35
  -2  -4 -19  168.23   16.38
  -2   4 -19  182.71   16.74
  -2  -4 -19  182.74   18.69
  -2   4 -19  169.16   14.05
  -2  -4 -19  192.05   18.11
  -2   4 -20   52.68    9.29
  -2  -4 -20   68.99   10.59
  -2   4 -20   53.67    8.59
  -2  -4 -20   58.25    8.84
  -2  -4 -20   68.95   10.06
   2   5 -20   -0.90    4.68
   2   5 -20    1.55    4.54
   2   5 -20    2.14    6.25
   2   5 -19   47.80   10.05
   2   5 -19   73.98   13.11
   2   5 -19   50.61   10.45
   2   5 -18   14.75    9.73
   2  -5 -18   12.47    8.24
   2  -5 -18   18.55   10.06
   2   5 -18   14.45   12.29
   2  -5 -18   12.19    9.48
   2   5 -17   -2.78    9.15
   2  -5 -17    8.83   11.69
   2  -5 -17   -3.76    8.07
   2   5 -17   -2.58   10.29
   2  -5 -17    2.27   11.41
   2   5 -17    1.24   13.01
   2  -5 -17    8.76    9.41
   2   5 -17   -3.94   10.44
   2  -5 -17    2.44    8.97
   2  -5 -16  143.03   20.08
   2   5 -16  147.24   19.70
   2  -5 -16  111.95   16.26
   2  -5 -16  148.00   18.42
   2  -5 -16  206.35   16.51
   2   5 -16  174.17   23.56
   2  -5 -16  130.15   20.28
   2   5 -16  169.58   20.62
   2  -5 -16  130.64   17.93
   2   5 -16  139.33   19.51
   2  -5 -15   12.57   11.67
   2  -5 -15    6.16    7.04
   2   5 -15    7.17   10.70
   2  -5 -15    9.34   11.16
   2  -5 -15   16.17   10.37
   2   5 -15    8.29   12.93
   2  -5 -15    3.15    7.62
   2  -5 -15    5.26    9.45
   2   5 -15    2.87   10.25
   2  -5 -14  270.00   25.95
   2  -5 -14  294.98   28.06
   2  -5 -14  251.95   25.54
   2   5 -14  302.92   26.23
   2  -5 -14  166.95   19.94
   2  -5 -14  161.53   16.78
   2   5 -14  307.37   28.69
   2  -5 -14  293.72   25.30
   2   5 -14  280.52   26.25
   2   5 -14  251.19   22.94
   2  -5 -14  254.33   23.62
   2  -5 -13   86.77   15.71
   2  -5 -13   93.37   15.84
   2  -5 -13   62.28   12.57
   2   5 -13   93.42   17.25
   2  -5 -13   95.47   15.03
   2   5 -13  105.09   15.97
   2  -5 -13   90.68   15.91
   2   5 -13   87.81   14.24
   2   5 -13   74.61   14.70
   2  -5 -13   84.49   14.10
   2   5 -13  103.77   33.92
   2  -5 -12  435.39   32.14
   2  -5 -12  412.61   30.39
   2   5 -12  394.57   49.22
   2   5 -12  380.60   27.52
   2  -5 -12  370.42   27.71
   2  -5 -12  277.75   56.59
   2   5 -12  407.66   29.96
   2   5 -12  443.11   59.32
   2  -5 -12  374.39   28.42
   2   5 -12  410.79   29.30
   2  -5 -12  391.69   28.29
   2  -5 -12  379.42   30.01
   2  -5 -11  516.14   34.12
   2  -5 -11  559.79   35.89
   2  -5 -11  580.47   75.90
   2   5 -11  507.75   32.06
   2   5 -11  537.17   56.31
   2   5 -11  642.42   68.01
   2  -5 -11  479.15   31.22
   2   5 -11  541.51   34.09
   2   5 -11  532.10   32.89
   2  -5 -11  518.12   32.35
   2  -5 -11  518.10   34.64
   2  -5 -11  515.85   57.92
   2  -5 -10  462.66   66.83
   2   5 -10  462.33   50.24
   2   5 -10  511.86   58.62
   2  -5 -10  473.22   52.72
   2   5  -9  927.70   70.89
   2  -5  -9  910.66   90.35
   2  -5  -9  904.51   91.22
   2  -5  -9  943.43   73.75
  -2   5   9 1202.41   80.28
   2   5  -9  948.97   92.99
   2  -5  -8  962.39   89.82
   2  -5  -8  988.15   90.44
   2  -5  -8  988.11   71.73
   2   5  -8  920.78   86.37
   2  -5  -7  283.76   47.19
   2   5  -7  238.58   28.53
   2  -5  -7  223.05   31.74
   2   5  -7  262.44   44.43
   2  -5  -6 1421.37  100.72
   2   5  -6 1383.90   75.27
   2  -5  -6 1460.73   82.85
   2   5  -6 1473.48   98.54
   2   5  -5 1796.38   86.77
   2  -5  -5 1806.83  110.42
   2   5  -5 1730.67  105.76
  -2  -5   4   16.60    8.21
   2  -5  -4   14.74   20.61
   2   5  -4   16.77    9.72
   2   5  -4   27.00   19.50
  -2  -5   3  570.66   39.98
   2  -5  -3  593.86   53.47
  -2   5   3  542.55   39.22
   2   5  -3  582.08   38.89
  -2  -5   2  239.44   27.49
   2  -5  -2  214.62   32.05
   2   5  -2  194.55   22.57
  -2   5   2  201.32   23.26
  -2  -5   1   47.16   16.64
  -2   5   1   45.00   14.03
  -2  -5   0   -1.15   14.67
  -2   5   0   -1.17   11.76
  -2  -5  -1   19.15   16.58
  -2   5  -1   43.41   15.37
  -2   5  -1   32.84   15.42
  -2  -5  -2 1106.83   70.64
  -2   5  -2 1041.20   59.05
  -2  -5  -3  253.40   23.51
  -2  -5  -3  260.07   35.65
  -2  -5  -3  265.36   31.05
  -2   5  -3  255.01   25.67
  -2  -5  -4   44.92   21.60
  -2  -5  -4   19.33   11.41
  -2  -5  -4   43.76   16.73
  -2   5  -4   49.31   12.14
  -2   5  -4   39.36   18.62
  -2  -5  -5  110.60   26.56
  -2  -5  -5  136.37   22.66
  -2  -5  -5  124.94   26.20
  -2   5  -5  186.55   31.42
  -2   5  -5  154.62   18.75
  -2  -5  -6  858.24   67.91
  -2  -5  -6  833.59   59.96
  -2  -5  -6  896.12   69.31
  -2   5  -6  978.61   74.29
  -2   5  -6  883.67   48.45
  -2  -5  -7  794.27   67.74
  -2  -5  -7  761.98   67.40
  -2   5  -7  776.08   71.36
  -2   5  -7  845.55   56.72
  -2  -5  -8  318.05   44.37
  -2  -5  -8  271.33   42.56
  -2   5  -8  256.82   32.31
  -2   5  -8  282.76   46.31
  -2  -5  -9 1453.56  103.72
  -2   5  -9 1469.58   90.76
  -2   5  -9 1575.20  116.55
  -2  -5 -10  931.34   83.77
  -2   5 -10 1108.65   88.26
  -2  -5 -10 1110.21   86.93
  -2   5 -10 1213.73   81.86
  -2   5 -11  410.97   55.13
  -2  -5 -11  450.89   30.89
  -2  -5 -11  469.26   32.58
  -2  -5 -11  503.24   37.95
  -2   5 -11  447.23   32.46
  -2  -5 -11  497.91   35.29
  -2  -5 -11  461.96   32.15
  -2   5 -11  478.03   53.02
  -2   5 -11  473.21   33.77
  -2  -5 -11  412.20   54.92
  -2   5 -11  523.12   35.44
  -2   5 -12 1076.75   52.88
  -2   5 -12 1020.36   92.68
  -2  -5 -12  976.64   53.28
  -2  -5 -12 1064.46   56.18
  -2  -5 -12 1062.74   61.86
  -2   5 -12  994.26   55.77
  -2  -5 -12 1092.54   56.29
  -2  -5 -12 1020.02   90.57
  -2   5 -12 1225.12   60.30
  -2   5 -12 1143.91   58.25
  -2   5 -12 1097.11   85.19
  -2   5 -13  179.58   17.72
  -2   5 -13  147.20   17.38
  -2   5 -13  175.12   39.91
  -2  -5 -13  168.33   19.39
  -2   5 -13  223.82   23.83
  -2  -5 -13  174.13   20.43
  -2   5 -13  208.10   23.29
  -2  -5 -13  179.69   39.72
  -2   5 -13  213.91   22.64
  -2   5 -14   13.49    7.67
  -2  -5 -14   23.17    9.67
  -2   5 -14   35.16    9.90
  -2   5 -14   34.43   14.07
  -2  -5 -14   30.49   12.30
  -2  -5 -14   43.57   36.54
  -2   5 -14   31.52   12.07
  -2   5 -14   25.78   11.15
  -2   5 -15  158.16   18.12
  -2   5 -15  219.55   20.11
  -2  -5 -15  210.33   22.00
  -2   5 -15  237.69   26.07
  -2  -5 -15  238.83   25.00
  -2   5 -15  219.68   23.30
  -2   5 -15  235.11   24.87
  -2   5 -16   17.02    9.72
  -2  -5 -16   13.53   11.01
  -2   5 -16   22.16    8.65
  -2  -5 -16   16.65   10.18
  -2   5 -16   26.36    8.72
  -2  -5 -17   -2.89   11.48
  -2   5 -17   17.34    7.29
  -2  -5 -17    7.13   10.03
  -2  -5 -18    7.47   10.14
  -2  -5 -18    6.73    7.60
  -2   5 -18    4.82    7.83
  -2  -5 -18   15.19    9.66
  -2  -5 -19    4.70    7.27
  -2   5 -19   -3.31    8.32
  -2   5 -19    6.35    6.15
  -2  -5 -19   -0.35    6.25
  -2  -5 -19   -1.48    6.56
  -2  -5 -20    9.00    5.11
  -2  -5 -20   27.89    7.71
  -2   5 -20   14.51    5.50
  -2   5 -20   11.35    6.46
  -2  -5 -20   14.69    6.43
   2   6 -20  542.35   26.93
   2   6 -20  497.71   26.57
   2   6 -20  586.53   28.83
   2   6 -19   21.14    7.47
   2   6 -19   29.49   10.15
   2   6 -19   13.97    6.91
   2  -6 -19    8.73   19.55
   2   6 -18  584.09   41.20
   2  -6 -18  652.59   48.10
   2   6 -18  646.75   43.63
   2  -6 -18  543.44   38.29
   2   6 -17    8.83    9.53
   2  -6 -17    8.47    7.99
   2   6 -17    9.69   13.39
   2  -6 -17    9.09    8.86
   2   6 -17    9.29    9.28
   2  -6 -17    6.08    8.04
   2   6 -17   14.25   11.26
   2   6 -16  312.03   28.04
   2  -6 -16  284.10   24.89
   2   6 -16  356.78   31.80
   2  -6 -16  272.98   27.84
   2   6 -16  306.63   26.06
   2  -6 -16  282.25   24.91
   2   6 -16  312.38   28.33
   2  -6 -16  276.31   24.72
   2  -6 -15    1.06   10.73
   2  -6 -15    3.16    8.45
   2   6 -15   14.48   10.24
   2  -6 -15    4.81   11.33
   2  -6 -15   -1.43    6.76
   2   6 -15    0.18   13.57
   2  -6 -15    9.62    9.70
   2   6 -15   -5.04   10.84
   2  -6 -14  730.33   44.92
   2  -6 -14  760.04   46.39
   2  -6 -14  443.14   32.50
   2  -6 -14  778.13   42.94
   2   6 -14  941.20   50.94
   2   6 -14  813.19   44.38
   2  -6 -14  596.25   40.03
   2  -6 -14  739.02   42.34
   2   6 -14  892.11   48.33
   2  -6 -13   94.62   16.36
   2  -6 -13   95.25   16.63
   2  -6 -13   77.55   13.43
   2   6 -13   88.43   14.73
   2  -6 -13   86.84   13.71
   2  -6 -13   92.90   16.65
   2  -6 -13   15.50    8.79
   2   6 -13  104.81   17.37
   2  -6 -13   95.58   14.60
   2   6 -13  104.69   16.28
   2   6 -13  125.99   39.10
   2  -6 -12   53.86   13.16
   2  -6 -12   46.79   12.17
   2  -6 -12   55.48   12.56
   2  -6 -12    1.30    9.41
   2   6 -12   55.10   11.52
   2   6 -12   65.88   13.98
   2  -6 -12   58.31   11.98
   2  -6 -12   55.67   11.75
   2   6 -12   52.65   10.78
   2  -6 -12   55.65   11.20
   2   6 -12   62.15   23.77
   2  -6 -12   63.34   33.93
   2   6 -12   75.52   30.02
   2   6 -12   67.01   13.21
   2  -6 -11    4.86    8.58
   2  -6 -11   18.30    8.63
   2   6 -11   12.89    9.27
   2   6 -11   -0.07    7.94
   2  -6 -11   17.32   22.59
   2   6 -11   16.77   15.97
   2  -6 -11   -2.31    7.33
   2   6 -11   12.37   17.77
   2  -6 -11    8.10    7.82
   2   6 -11    7.85    8.32
   2  -6 -11    5.93    6.94
   2  -6 -11   10.53    7.33
   2  -6 -10    7.15    6.82
   2   6 -10   -0.91    7.25
   2   6 -10   14.12   14.89
   2  -6 -10   17.77   30.68
   2  -6 -10   16.28    7.84
   2   6 -10   -2.84   24.56
   2  -6 -10    8.96   15.84
   2  -6  -9   23.58   29.17
   2   6  -9    8.93   14.46
   2  -6  -9   26.97   26.73
   2   6  -9   -7.13   22.52
   2  -6  -9   10.41   12.03
  -2   6   9   25.01   20.16
   2  -6  -8    4.84   23.22
   2  -6  -8    2.92   11.95
   2   6  -8   -1.53   22.78
   2   6  -7   10.02    9.42
   2  -6  -7    9.92   21.17
   2  -6  -7   13.36   12.63
   2   6  -7   16.01   21.67
   2  -6  -6  672.94   71.01
   2   6  -6  711.75   49.90
   2   6  -6  690.86   68.35
   2   6  -5    4.15   10.76
   2  -6  -5   16.03   25.26
   2   6  -5  -14.61   21.41
  -2  -6   4 2333.59  103.36
   2  -6  -4 2404.72  133.18
   2   6  -4 2312.49  106.68
   2   6  -4 2546.20  132.32
  -2  -6   3   80.31   16.99
   2  -6  -3   73.24   26.54
   2   6  -3   76.41   17.05
  -2   6   3   63.88   17.26
  -2  -6   2 2001.56   98.72
  -2   6   2 1943.28   95.40
   2   6  -2 1955.03   94.55
  -2  -6   1  138.85   25.56
  -2   6   1  113.64   21.31
  -2  -6   0 4358.98  183.73
  -2   6   0 4176.88  172.11
  -2  -6  -1   48.42   22.35
  -2   6  -1   22.92   15.24
  -2   6  -1   33.72   16.17
  -2  -6  -2 1588.67   94.38
  -2   6  -2 1552.05   80.56
  -2  -6  -3    8.09   19.69
  -2   6  -3    9.25   10.54
  -2  -6  -4  945.93   58.21
  -2  -6  -4 1035.34   74.72
  -2  -6  -4  970.00   69.49
  -2   6  -4  959.40   70.97
  -2   6  -4  951.55   55.81
  -2  -6  -5   66.49   24.63
  -2  -6  -5   80.62   18.75
  -2  -6  -5   99.65   26.27
  -2   6  -5   64.01   14.26
  -2   6  -5   74.99   24.55
  -2   6  -5   69.42   13.08
  -2  -6  -6 1067.14   80.96
  -2  -6  -6 1151.09   83.25
  -2   6  -6 1170.46   62.34
  -2   6  -6 1163.34   85.33
  -2   6  -6 1169.00   59.35
  -2  -6  -7  176.88   30.69
  -2  -6  -7  171.61   34.76
  -2  -6  -7  159.38   33.25
  -2   6  -7  171.50   23.35
  -2   6  -7  141.53   33.38
  -2  -6  -8  795.34   73.01
  -2  -6  -8  839.86   77.87
  -2   6  -8  816.94   57.22
  -2   6  -8  831.61   81.01
  -2  -6  -9   25.13   20.92
  -2  -6  -9    0.88   16.13
  -2   6  -9   39.14   25.61
  -2   6  -9    3.45    9.76
  -2  -6 -10   64.45   24.18
  -2   6 -10   96.84   14.78
  -2  -6 -10   75.58   13.31
  -2  -6 -10  151.15   26.98
  -2  -6 -10   96.70   13.66
  -2   6 -10   98.75   15.42
  -2   6 -10   99.33   35.64
  -2  -6 -10   69.96   24.71
  -2  -6 -11    7.86    7.37
  -2   6 -11   -3.34   18.09
  -2   6 -11   13.61    7.15
  -2   6 -11   22.90   11.43
  -2  -6 -11    3.54    7.47
  -2  -6 -11    7.66    8.45
  -2   6 -11    7.14    9.34
  -2  -6 -11  -10.54   16.35
  -2   6 -11    6.44   10.35
  -2   6 -12  166.05   17.63
  -2   6 -12  203.60   41.63
  -2  -6 -12  140.26   17.77
  -2  -6 -12  165.61   19.55
  -2  -6 -12  237.66   36.27
  -2   6 -12  176.26   20.90
  -2  -6 -12  152.39   19.13
  -2   6 -12  176.09   20.96
  -2  -6 -12  117.32   30.96
  -2   6 -12  187.77   21.95
  -2   6 -13    0.42    6.75
  -2  -6 -13   -2.42    8.36
  -2  -6 -13   -2.80    9.25
  -2  -6 -13  -10.79   17.42
  -2   6 -13   11.20   10.83
  -2   6 -13   -1.41   10.11
  -2  -6 -14 1024.77   54.19
  -2  -6 -14 1240.61   69.65
  -2  -6 -14 1072.46   57.54
  -2   6 -14 1177.30   59.36
  -2   6 -14 1133.75   58.50
  -2   6 -15   42.40   11.34
  -2  -6 -15   65.20   13.51
  -2   6 -15   50.69   11.24
  -2  -6 -15   60.09   14.52
  -2   6 -15   77.74   15.83
  -2   6 -16  421.18   28.03
  -2  -6 -16  380.55   28.71
  -2  -6 -16  411.58   31.78
  -2  -6 -17    3.29    8.55
  -2  -6 -17    4.18    7.20
  -2  -6 -17   -7.02   10.77
  -2   6 -17    1.69    7.67
  -2   6 -17    4.10    7.05
  -2   6 -18  647.32   35.24
  -2  -6 -18  661.77   35.92
  -2  -6 -18  652.32   39.30
  -2  -6 -18  736.88   38.46
  -2   6 -19    0.78    4.91
  -2  -6 -19   -1.41    4.98
  -2  -6 -19    4.37    6.41
  -2   6 -19    3.95    7.29
  -2  -6 -19    3.91    7.03
  -2   6 -20  622.07   30.53
  -2  -6 -20  632.56   31.41
  -2  -6 -20  607.11   29.81
   2   7 -20    8.66    5.45
   2   7 -19   27.06    7.23
   2   7 -19   14.98    6.22
   2   7 -19   24.25    9.05
   2   7 -18    7.52    7.48
   2   7 -18   22.77   10.41
   2   7 -17   52.18   13.20
   2  -7 -17   34.80    9.93
   2   7 -17   59.40   16.06
   2  -7 -17   48.73   11.95
   2   7 -17   50.45   13.78
   2   7 -16   -9.05   13.04
   2   7 -16    6.26    8.11
   2  -7 -16    4.44    7.45
   2  -7 -16    2.30    7.04
   2  -7 -16    9.70    9.31
   2   7 -16    8.85   11.82
   2   7 -15  133.94   20.21
   2  -7 -15   76.62   14.03
   2  -7 -15   79.29   14.40
   2   7 -15  129.86   16.30
   2  -7 -15  116.09   16.48
   2   7 -15  141.65   20.72
   2  -7 -14   30.96   13.16
   2  -7 -14   23.40   11.34
   2  -7 -14   33.26    9.85
   2   7 -14   31.23   13.88
   2   7 -14   20.34    9.63
   2  -7 -14   15.92    7.79
   2  -7 -14   17.33    9.00
   2   7 -14   19.78   11.71
   2  -7 -13  141.77   19.14
   2   7 -13  156.94   20.44
   2  -7 -13  100.71   17.30
   2  -7 -13   90.89   14.61
   2  -7 -13   91.78   13.93
   2  -7 -13   86.11   13.24
   2   7 -13  143.36   17.09
   2  -7 -13   96.86   39.18
   2   7 -13  151.96   19.80
   2  -7 -13  128.60   16.53
   2   7 -13   80.60   34.63
   2  -7 -12   90.35   15.07
   2  -7 -12   71.81   14.38
   2  -7 -12   74.42   15.19
   2  -7 -12   63.02   11.57
   2   7 -12  112.67   14.47
   2  -7 -12   55.01   10.63
   2   7 -12   58.74   13.88
   2  -7 -12   30.59    9.02
   2  -7 -12   69.33   12.06
   2  -7 -12   50.64   29.61
   2   7 -12   73.05   14.21
   2   7 -12   88.05   27.55
   2   7 -12   84.29   30.16
   2  -7 -11  569.01   36.60
   2  -7 -11  624.06   38.27
   2  -7 -11  593.56   80.50
   2   7 -11  680.73   66.07
   2   7 -11  602.73   36.85
   2   7 -11  643.18   72.68
   2  -7 -11  533.17   32.95
   2  -7 -11  565.18   33.27
   2  -7 -11  571.33   37.65
   2   7 -11  562.09   36.23
   2  -7 -11  544.63   34.77
   2  -7 -10  198.52   48.01
   2  -7 -10  260.88   23.20
   2  -7 -10  265.27   23.21
   2   7 -10  276.55   22.92
   2   7 -10  254.09   39.52
   2  -7 -10  289.57   57.90
   2  -7 -10  268.52   23.73
   2  -7 -10  146.20   15.41
   2   7 -10  273.93   57.07
   2  -7  -9  790.83   89.15
   2  -7  -9  800.49   90.98
   2   7  -9  960.87   97.37
   2   7  -8    2.40   10.06
   2  -7  -8   11.86   29.91
   2   7  -8   35.54   27.28
   2  -7  -7 1828.69  127.99
   2   7  -7 1998.62  129.43
   2  -7  -6   87.42   34.08
   2   7  -6   80.21   18.07
   2   7  -6   81.66   30.72
   2  -7  -5 1601.49  112.95
   2   7  -5 1729.49   88.63
   2   7  -5 1561.19   85.77
   2   7  -5 1641.57  110.68
  -2  -7   4   24.30   12.19
   2  -7  -4   26.95   23.22
   2   7  -4   38.82   25.83
  -2   7   4   20.92   14.05
   2   7  -4   33.77   14.72
  -2  -7   3 1380.82   77.67
   2  -7  -3 1277.88   92.93
  -2   7   3 1299.28   77.57
   2   7  -3 1386.06   77.35
  -2  -7   2  115.40   22.90
  -2   7   2  120.25   23.73
   2   7  -2  129.40   24.00
  -2  -7   1   78.39   22.85
  -2   7   1   70.70   19.92
  -2  -7   0   84.80   25.04
  -2   7   0   76.84   20.91
  -2  -7  -1   21.75   21.89
  -2   7  -1   10.34   15.82
  -2  -7  -2   49.15   25.62
  -2   7  -2   43.48   20.77
  -2   7  -2   49.51   16.50
  -2  -7  -3  113.20   31.60
  -2   7  -3   58.85   16.52
  -2  -7  -4  537.76   57.16
  -2  -7  -4  592.77   56.63
  -2   7  -4  583.48   43.76
  -2  -7  -5  940.42   74.60
  -2  -7  -5  641.90   52.45
  -2  -7  -5  825.22   69.25
  -2   7  -5  936.23   74.63
  -2   7  -5  661.87   46.83
  -2  -7  -6  403.00   50.72
  -2  -7  -6  375.39   40.07
  -2  -7  -6  398.79   50.04
  -2   7  -6  393.12   51.27
  -2  -7  -7  237.82   41.12
  -2  -7  -7  304.25   38.62
  -2  -7  -7  271.93   44.46
  -2   7  -7  325.92   49.03
  -2  -7  -8   32.76   21.55
  -2  -7  -8   15.40   13.17
  -2  -7  -8   20.52   15.64
  -2   7  -8   24.49   22.67
  -2  -7  -9  416.56   57.06
  -2  -7  -9  420.32   59.77
  -2  -7  -9  597.88   60.81
  -2   7  -9  547.53   70.81
  -2  -7 -10   21.26   22.00
  -2  -7 -10   29.03    9.37
  -2  -7 -10   21.86   22.12
  -2   7 -10   27.57    8.86
  -2  -7 -10   10.76    7.71
  -2  -7 -10   20.85    8.83
  -2  -7 -10   -0.35   16.38
  -2   7 -10    2.84   25.20
  -2   7 -10   23.19    9.99
  -2   7 -10    8.66    7.96
  -2   7 -11 1325.28   61.02
  -2  -7 -11 1113.66  100.70
  -2   7 -11 1193.99  102.25
  -2  -7 -11 1272.72   62.16
  -2  -7 -11 1235.97   62.69
  -2  -7 -11 1265.65   68.76
  -2  -7 -11 1295.67   64.47
  -2  -7 -11 1386.08  105.14
  -2   7 -11 1389.92   65.84
  -2   7 -11 1448.72   67.68
  -2   7 -12   23.12    7.49
  -2   7 -12   29.95   22.62
  -2  -7 -12   44.29   11.46
  -2  -7 -12   38.64   11.58
  -2  -7 -12   25.74    9.80
  -2   7 -12   47.81   12.78
  -2   7 -12   37.94   13.21
  -2  -7 -12   49.10   25.11
  -2   7 -13  288.13   25.19
  -2  -7 -13  361.32   28.23
  -2  -7 -13  470.46   48.28
  -2  -7 -13  360.77   30.34
  -2   7 -13  417.75   32.11
  -2   7 -13  453.05   33.59
  -2   7 -14   42.61   12.21
  -2  -7 -14   59.05   12.46
  -2   7 -14   42.88   10.15
  -2  -7 -14   62.70   14.56
  -2   7 -14   62.29   13.69
  -2   7 -14   70.50   16.31
  -2  -7 -15   72.06   13.51
  -2   7 -15   93.44   13.86
  -2  -7 -15   71.87   15.78
  -2   7 -15   86.85   14.99
  -2   7 -16   -1.40    6.54
  -2  -7 -16   -3.85    8.84
  -2  -7 -16    5.46   11.31
  -2   7 -16   -0.18    7.48
  -2   7 -16    5.28    7.40
  -2  -7 -17   17.51    8.88
  -2  -7 -17   14.67    9.96
  -2   7 -17   16.19    8.08
  -2  -7 -17   15.63    6.40
  -2   7 -17   15.20    7.38
  -2   7 -18    5.94    6.69
  -2  -7 -18   14.19    8.60
  -2  -7 -18    7.85    5.55
  -2  -7 -18   17.29    7.76
  -2  -7 -19   27.83    8.61
  -2   7 -19   25.45    7.90
  -2  -7 -19   16.38    5.47
  -2  -7 -19   26.17    7.37
  -2  -7 -20   20.05    6.14
  -2   7 -20   -1.49    4.70
   2   8 -19   85.29   10.06
   2   8 -19   80.07    9.90
   2   8 -19  101.82   11.52
   2   8 -18  229.04   19.60
   2   8 -18  257.78   21.14
   2   8 -18  255.76   21.14
   2   8 -17  394.41   28.21
   2   8 -17  414.58   29.27
   2   8 -17  423.50   30.00
   2  -8 -17  325.67   23.86
   2   8 -16  261.77   27.54
   2  -8 -16  213.33   22.21
   2   8 -16  279.64   27.47
   2  -8 -16  197.37   21.91
   2   8 -15  184.90   23.69
   2  -8 -15  137.37   17.61
   2   8 -15  204.13   23.82
   2  -8 -15  162.02   18.06
   2  -8 -15  167.15   19.57
   2   8 -14  272.42   27.16
   2  -8 -14  186.97   20.74
   2   8 -14  283.87   26.95
   2  -8 -14  257.45   21.85
   2  -8 -14  181.47   20.99
   2  -8 -13   45.17   10.22
   2   8 -13   58.40   14.88
   2   8 -13   70.51   14.86
   2  -8 -13   43.46   10.26
   2   8 -12  216.21   22.52
   2  -8 -12  239.20   56.92
   2   8 -12  197.51   45.19
   2  -8 -12  126.28   15.68
   2  -8 -12  201.58   17.10
   2   8 -12  177.20   20.54
   2  -8 -12  142.17   17.57
   2  -8 -11  331.95   27.20
   2  -8 -11  320.80   61.60
   2   8 -11  322.15   47.72
   2   8 -11  364.75   27.99
   2  -8 -11  338.57   24.56
   2  -8 -11  306.43   27.33
   2   8 -11  291.91   25.31
   2  -8 -11  197.50   18.37
   2  -8 -11  355.85   26.97
   2   8 -11  260.74   59.42
   2  -8 -10    8.33    9.51
   2  -8 -10   19.21   27.75
   2  -8 -10   14.80    8.66
   2   8 -10   16.02    8.79
   2   8 -10   27.46   17.52
   2  -8 -10   19.38   24.23
   2  -8 -10    1.44    8.04
   2   8 -10   10.08    8.42
   2  -8 -10   16.36    8.35
   2   8 -10   81.21   13.26
   2  -8 -10   21.30   10.12
   2   8 -10   12.36    9.82
   2   8 -10   26.13   34.89
  -2   8  10   36.41   22.49
   2  -8  -9  127.64   43.81
   2  -8  -9  125.41   16.10
   2  -8  -9   67.14   32.44
   2   8  -9  121.42   15.18
   2   8  -9  103.46   13.54
   2  -8  -9  127.12   16.09
   2  -8  -9   51.34    9.05
   2   8  -9   96.82   38.79
   2  -8  -8   20.07   29.09
   2   8  -8   14.32   28.05
   2   8  -7 1049.85   68.84
   2  -8  -7  964.84   96.65
   2   8  -7 1022.52   97.63
   2  -8  -6  203.89   45.63
   2   8  -6  187.99   26.78
   2   8  -6  198.61   41.17
   2  -8  -5  168.39   41.04
   2   8  -5  228.01   43.34
  -2   8   5  182.67   29.74
   2   8  -5  185.19   27.73
  -2  -8   4  829.58   56.82
   2  -8  -4  817.41   79.15
   2   8  -4  739.37   57.04
  -2   8   4  759.78   60.32
  -2  -8   3 1058.38   68.80
   2  -8  -3  947.67   83.27
  -2   8   3  973.17   69.50
   2   8  -3 1056.88   69.14
  -2  -8   2 1357.15   84.13
   2   8  -2 1355.23   81.73
  -2   8   2 1294.79   81.37
  -2  -8   1  818.96   64.80
  -2   8   1  736.58   58.53
  -2  -8   0  618.35   58.83
  -2   8   0  590.32   51.86
  -2  -8  -1  942.46   76.53
  -2   8  -1  923.79   66.42
  -2  -8  -2  834.99   71.26
  -2   8  -2  707.29   58.32
  -2   8  -2  651.85   53.62
  -2  -8  -3 1838.52  116.01
  -2   8  -3 1880.48   97.22
  -2  -8  -4 1119.76   85.88
  -2  -8  -4 1054.35   81.83
  -2   8  -4  987.97   63.22
  -2  -8  -5   29.22   21.51
  -2  -8  -5   50.87   16.27
  -2  -8  -5   57.23   24.82
  -2   8  -5   50.35   24.86
  -2   8  -5   56.16   14.85
  -2  -8  -6 1084.28   88.06
  -2  -8  -6 1036.92   87.73
  -2   8  -6 1080.09   90.05
  -2  -8  -7  200.40   39.48
  -2  -8  -7  165.32   36.55
  -2   8  -7  201.44   40.93
  -2  -8  -8   48.92   23.60
  -2  -8  -8   51.41   24.73
  -2   8  -8   77.10   29.50
  -2  -8  -9   56.52   24.39
  -2  -8  -9   79.45   30.04
  -2  -8  -9   70.88   11.88
  -2  -8  -9  104.92   21.34
  -2  -8  -9   64.81   12.19
  -2  -8  -9   61.13   23.75
  -2   8  -9   73.74   32.22
  -2   8  -9   93.22   14.35
  -2  -8 -10   29.52   17.95
  -2   8 -10   40.65    9.87
  -2  -8 -10   53.48   25.99
  -2  -8 -10   50.05   11.08
  -2  -8 -10   53.91   11.92
  -2  -8 -10   38.53    9.89
  -2  -8 -10  103.84   29.60
  -2  -8 -10   74.19   26.13
  -2   8 -10   22.66   25.17
  -2   8 -10   47.81   11.12
  -2   8 -10   48.04   12.41
  -2  -8 -11  188.63   19.81
  -2   8 -11  188.53   18.94
  -2  -8 -11  114.64   35.29
  -2  -8 -11  228.24   21.78
  -2  -8 -11  303.66   39.39
  -2  -8 -11  209.39   22.18
  -2   8 -11  207.52   21.11
  -2  -8 -11  219.92   40.70
  -2   8 -11  169.83   48.10
  -2   8 -11  221.42   22.97
  -2   8 -12  213.05   21.19
  -2  -8 -12  298.51   25.30
  -2   8 -12  271.36   50.71
  -2  -8 -12  285.67   25.50
  -2  -8 -12  289.76   26.75
  -2   8 -12  295.87   25.69
  -2  -8 -12  293.48   50.86
  -2   8 -12  347.61   29.01
  -2   8 -13  103.72   17.26
  -2  -8 -13   84.26   13.96
  -2   8 -13   90.22   13.82
  -2  -8 -13  111.95   18.04
  -2   8 -13  130.18   19.01
  -2   8 -13  128.58   18.00
  -2   8 -14  273.20   24.05
  -2  -8 -14  252.90   23.68
  -2  -8 -14  333.83   28.84
  -2   8 -14  365.64   30.35
  -2   8 -14  302.27   27.70
  -2   8 -15  158.81   17.29
  -2  -8 -15  159.24   18.43
  -2  -8 -15  126.87   19.08
  -2   8 -15  155.72   19.69
  -2   8 -16  303.98   22.43
  -2  -8 -16  265.01   22.60
  -2  -8 -16  262.75   20.52
  -2  -8 -16  290.41   26.33
  -2   8 -16  221.92   21.84
  -2  -8 -17  362.76   25.34
  -2  -8 -17  362.51   28.15
  -2   8 -17  368.68   25.94
  -2   8 -18  362.71   24.05
  -2  -8 -18  340.30   25.31
  -2  -8 -18  338.21   22.68
  -2   8 -19  139.08   12.76
  -2  -8 -19  139.82   13.77
  -2  -8 -19  117.63   11.44
   2   9 -18    4.35    5.43
   2   9 -18   11.37    7.08
   2   9 -18   13.86    7.49
   2   9 -17    2.76    6.98
   2   9 -17    8.31    8.91
   2   9 -17    1.83    8.34
   2  -9 -17    1.41   40.91
   2   9 -16    5.35   10.48
   2   9 -16   -6.91    9.32
   2  -9 -16   -8.72    7.47
   2  -9 -15   10.14    8.02
   2   9 -15   21.05   12.01
   2   9 -15    6.72   10.09
   2  -9 -15    9.29    8.15
   2   9 -14  161.85   22.35
   2  -9 -14  132.45   17.09
   2  -9 -14  109.74   16.56
   2   9 -14  127.68   19.16
   2  -9 -13   77.80   13.01
   2   9 -13  115.52   19.00
   2  -9 -13   74.74   13.77
   2   9 -13   83.44   15.88
   2   9 -12  589.44   39.03
   2  -9 -12  440.13   74.29
   2   9 -12  570.00   36.49
   2  -9 -12  607.71   30.14
   2  -9 -12  380.42   31.39
   2  -9 -11   67.34   38.22
   2  -9 -11   10.40   25.94
   2   9 -11    4.58    9.34
   2   9 -11   17.36   17.08
   2  -9 -11    8.59    6.95
   2   9 -11    9.60    8.37
   2   9 -11    7.35    7.45
   2   9 -11   24.24   32.46
   2  -9 -10  648.25   92.02
   2   9 -10  830.82   44.64
   2  -9 -10  716.92   91.27
   2   9 -10  794.36   75.60
   2  -9 -10  757.07   42.40
   2   9 -10  726.26   41.05
   2  -9 -10  517.68   32.49
   2   9 -10  839.28   43.73
   2   9 -10  774.69   45.11
   2   9 -10  889.96  104.06
  -2   9  10  741.74   76.31
   2  -9  -9  182.03   48.60
   2  -9  -9  136.54   16.56
   2  -9  -9  185.98   19.94
   2   9  -9  139.08   16.98
   2  -9  -9  148.02   42.84
   2  -9  -9  168.25   18.04
   2  -9  -9  118.69   13.25
   2   9  -9  162.14   17.30
   2   9  -9  145.93   44.12
   2   9  -9  151.48   19.04
   2  -9  -8 2493.47  166.84
   2   9  -8 2348.42   82.66
   2   9  -8 2729.60  171.28
  -2   9   8 2456.75  128.46
   2   9  -7  265.93   33.72
   2  -9  -7  294.30   56.76
   2   9  -7  246.52   51.28
  -2   9   7  248.08   38.95
   2   9  -6  417.14   43.01
   2  -9  -6  554.74   72.63
   2   9  -6  499.29   66.69
  -2   9   6  531.40   54.65
   2  -9  -5  105.34   37.33
   2   9  -5   69.62   19.31
   2   9  -5  112.16   34.65
  -2   9   5   82.20   24.83
  -2  -9   4  543.65   48.40
   2  -9  -4  485.22   64.62
   2   9  -4  541.15   50.13
  -2   9   4  483.78   51.21
  -2  -9   3    0.06   13.20
   2  -9  -3   -5.23   23.21
  -2   9   3   -5.95   14.97
   2   9  -3   -1.54   12.68
  -2  -9   2 1326.84   87.43
   2   9  -2 1353.72   85.95
  -2   9   2 1164.81   82.13
  -2  -9   1   71.20   23.92
  -2   9   1   90.05   24.88
   2   9  -1  108.29   26.74
  -2  -9   0   71.99   26.49
  -2   9   0   58.95   22.52
  -2  -9  -1   26.42   21.30
  -2   9  -1   30.40   20.15
  -2  -9  -2  149.41   36.27
  -2   9  -2  149.71   26.93
  -2   9  -2  112.71   26.57
  -2  -9  -3   68.87   28.50
  -2   9  -3   65.92   18.82
  -2  -9  -4  447.77   56.24
  -2  -9  -4  388.48   51.63
  -2   9  -4  319.78   35.25
  -2  -9  -5   -2.62   18.64
  -2  -9  -5    5.04   21.22
  -2   9  -5   -5.71    9.51
  -2   9  -5   -7.76   19.98
  -2  -9  -6  355.62   52.32
  -2  -9  -6  276.07   46.64
  -2   9  -6  389.23   55.49
  -2  -9  -7    9.34   17.05
  -2  -9  -7   -4.87   19.26
  -2   9  -7    9.58   21.30
  -2  -9  -8 2188.89  152.95
  -2  -9  -8 2264.36  149.40
  -2  -9  -8 2258.09   98.56
  -2  -9  -8 2421.95   97.81
  -2  -9  -8 2450.92  136.06
  -2   9  -8 2381.79  160.77
  -2  -9  -9   75.33   27.87
  -2  -9  -9   93.82   31.90
  -2  -9  -9   86.35   25.07
  -2  -9  -9   62.72   12.82
  -2  -9  -9   78.70   13.05
  -2   9  -9   81.63   13.51
  -2   9  -9  105.04   39.47
  -2  -9  -9  101.35   14.97
  -2  -9  -9   79.13   27.92
  -2   9  -9   99.67   15.00
  -2  -9 -10  788.35   42.31
  -2  -9 -10  690.96   80.03
  -2   9 -10  687.26   39.82
  -2  -9 -10  742.36   44.08
  -2  -9 -10  845.83   51.76
  -2  -9 -10  706.34   41.96
  -2  -9 -10  791.96   75.43
  -2   9 -10  776.50   94.50
  -2   9 -10  736.06   41.22
  -2   9 -10  736.20   43.14
  -2   9 -11   44.68   13.39
  -2   9 -11   34.65    9.08
  -2  -9 -11   36.74    9.60
  -2  -9 -11   41.63   29.69
  -2  -9 -11   39.94   10.63
  -2  -9 -11   46.59   12.37
  -2   9 -11   51.16   13.14
  -2   9 -11   37.23   10.19
  -2  -9 -11   56.30   26.43
  -2   9 -11   44.95   34.13
  -2  -9 -12  514.65   35.71
  -2   9 -12  519.00   35.45
  -2  -9 -12  659.21   40.26
  -2  -9 -12  859.45   57.80
  -2  -9 -12  665.73   42.30
  -2   9 -12  637.21   42.61
  -2   9 -12  720.32   42.42
  -2   9 -12  678.56   39.65
  -2   9 -13   12.63    7.99
  -2  -9 -13   11.78    7.47
  -2  -9 -13    2.19   10.15
  -2   9 -13   15.78   11.57
  -2   9 -13   24.78   12.62
  -2   9 -14  397.06   29.07
  -2  -9 -14  396.98   29.36
  -2  -9 -14  479.85   34.95
  -2   9 -14  488.04   35.45
  -2   9 -15    3.28    6.36
  -2  -9 -15   -1.17    7.15
  -2  -9 -15    1.14   10.76
  -2   9 -15   -0.03    9.99
  -2   9 -16   70.30   10.89
  -2  -9 -16   58.47   11.27
  -2  -9 -16   55.81   13.34
  -2   9 -16   64.75   12.87
  -2  -9 -17    4.04    6.69
  -2  -9 -17   -2.48    8.76
  -2   9 -17   11.49    7.28
  -2  -9 -18   -3.44    6.29
  -2   9 -18   13.43    7.42
  -2  -9 -18    9.44    5.25
  -2   9 -19   17.31    5.57
  -2  -9 -19   14.45    5.85
   2  10 -18    6.45    4.85
   2  10 -18   18.98    6.85
   2  10 -18    4.30    5.86
   2  10 -17  607.20   34.52
   2  10 -17  708.92   37.54
   2  10 -17  609.74   33.15
   2  10 -16    4.74    9.98
   2  10 -16    8.97    8.31
   2 -10 -16   -4.11    6.39
   2  10 -15  527.63   33.76
   2 -10 -15  511.95   32.70
   2  10 -14  100.00   19.36
   2  10 -14   95.56   16.00
   2  10 -13  195.30   24.75
   2  10 -13  178.24   21.40
   2  10 -12  450.41   35.13
   2  10 -12  417.18   31.23
   2 -10 -12  285.09   27.59
   2  10 -12  292.48   28.89
   2 -10 -11  958.00  114.92
   2  10 -11 1023.05   91.92
   2  10 -11 1102.78   56.02
   2 -10 -11  887.42  105.80
   2 -10 -11 1114.36   44.39
   2  10 -11 1087.88   52.92
   2 -10 -11  762.72   48.15
   2  10 -11 1147.66  127.98
   2  10 -11  746.08   49.56
   2 -10 -10  190.68   20.12
   2 -10 -10  259.62   64.48
   2  10 -10  188.66   21.54
   2 -10 -10  198.55   52.56
   2 -10 -10  127.89   17.35
   2  10 -10  178.15   19.68
   2  10 -10  219.03   56.31
   2  10 -10  168.33   20.82
  -2  10  10  189.39   41.67
   2 -10  -9    6.62   26.91
   2 -10  -9   11.50    8.18
   2 -10  -9  -22.79   25.85
   2  10  -9   10.19    8.32
   2 -10  -9    7.36    7.12
   2  10  -9    6.62    6.51
   2  10  -9    1.52    8.91
   2 -10  -8   -0.84    6.43
   2 -10  -8   -6.20   33.58
   2  10  -8    5.15    7.20
   2 -10  -8   10.68    7.76
   2  10  -8   -2.01    7.14
   2  10  -8   50.86   36.42
   2  10  -8    3.91    9.53
   2 -10  -7  118.88   41.10
   2 -10  -7   95.80   13.82
   2  10  -7  110.02   14.87
   2 -10  -7  162.43   13.07
   2  10  -7   98.86   13.36
   2  10  -7   81.03   38.45
   2  10  -7  130.22   18.13
  -2  10   7  104.15   28.47
   2  10  -6   10.45   11.18
   2 -10  -6  -12.15   26.80
  -2  10   6   25.40   19.37
   2  10  -6    4.64   21.87
   2 -10  -5  403.47   64.21
   2  10  -5  414.32   62.40
   2  10  -5  286.55   39.17
  -2  10   5  344.18   46.59
  -2 -10   4   74.08   20.67
   2 -10  -4   53.90   28.95
  -2  10   4   57.29   22.32
   2  10  -4   51.73   18.67
  -2 -10   3  247.10   37.58
   2 -10  -3  203.99   45.04
   2  10  -3  206.60   34.12
  -2  10   3  257.51   38.40
  -2 -10   2   24.07   18.11
  -2  10   2   25.11   19.20
   2  10  -2   16.01   15.99
  -2 -10   1  651.12   63.86
   2  10  -1  633.64   60.10
  -2  10   1  640.94   60.07
  -2 -10   0   57.00   25.48
   2  10   0   33.35   20.66
  -2  10   0   32.98   19.23
  -2 -10  -1 1109.32   91.19
  -2  10  -1 1111.10   82.26
  -2 -10  -2   58.71   28.47
  -2  10  -2   41.00   20.59
  -2  10  -2   17.70   13.96
  -2 -10  -3 1725.67  119.79
  -2  10  -3 1605.88   96.39
  -2 -10  -4   20.16   22.30
  -2 -10  -4   -0.76   18.21
  -2  10  -4    0.43    9.06
  -2 -10  -5  508.04   64.57
  -2 -10  -5  364.48   56.06
  -2  10  -5  554.84   67.74
  -2  10  -5  541.85   47.46
  -2 -10  -6   82.23   28.86
  -2 -10  -6   60.75   25.67
  -2  10  -6   62.05   28.25
  -2 -10  -7  260.55   47.80
  -2 -10  -7  253.97   22.09
  -2 -10  -7  241.77   49.11
  -2  10  -7  268.57   52.89
  -2  10  -7  262.41   24.64
  -2 -10  -8   79.65   32.36
  -2  10  -8  117.40   17.30
  -2 -10  -8   99.13   33.32
  -2 -10  -8  161.54   29.74
  -2 -10  -8  117.98   15.08
  -2 -10  -8   89.26   14.27
  -2  10  -8  103.40   38.35
  -2 -10  -8  106.33   15.28
  -2  10  -8   96.81   13.86
  -2 -10  -9  162.12   44.33
  -2 -10  -9  112.09   32.09
  -2 -10  -9  195.32   20.82
  -2 -10  -9  194.41   19.52
  -2 -10  -9  192.87   20.72
  -2  10  -9  164.48   43.32
  -2  10  -9  180.33   19.03
  -2  10  -9  175.15   21.69
  -2 -10 -10   27.06   25.05
  -2  10 -10    5.47    6.58
  -2 -10 -10    7.61   19.86
  -2 -10 -10   62.79   32.65
  -2 -10 -10   -2.07    7.87
  -2 -10 -10    0.05    8.09
  -2  10 -10    2.58    7.28
  -2  10 -10   23.35   27.51
  -2  10 -10    6.52   10.51
  -2  10 -10    3.21    8.00
  -2 -10 -11  262.59   59.10
  -2  10 -11  156.64   17.99
  -2 -10 -11  163.45   48.58
  -2 -10 -11  245.85   21.26
  -2 -10 -11  194.41   22.53
  -2 -10 -11  215.75   21.66
  -2 -10 -11  267.13   41.27
  -2  10 -11  218.71   20.33
  -2  10 -11  151.41   51.53
  -2  10 -11  233.94   25.44
  -2  10 -11  225.27   22.32
  -2  10 -12   -3.49    6.66
  -2 -10 -12    0.89    5.83
  -2 -10 -12   -7.30    9.73
  -2 -10 -12   -6.19    7.54
  -2  10 -12    2.84   10.54
  -2  10 -12    2.03    8.60
  -2 -10 -13  134.63   16.03
  -2  10 -13  130.86   16.41
  -2 -10 -13  188.10   22.01
  -2  10 -13  182.61   20.69
  -2  10 -13  174.40   22.43
  -2 -10 -14   10.96    6.53
  -2  10 -14    7.25    7.04
  -2 -10 -14   11.80   11.02
  -2  10 -14    7.19   10.11
  -2  10 -15  203.99   18.46
  -2 -10 -15  137.18   15.34
  -2 -10 -15  181.73   21.08
  -2  10 -15  169.65   20.18
  -2 -10 -16   -0.64    5.37
  -2  10 -16   -2.29    5.78
  -2 -10 -16    9.71    9.49
  -2  10 -16   10.54    8.98
  -2 -10 -17  280.38   19.27
  -2  10 -17  329.79   21.62
  -2 -10 -17  316.20   23.61
  -2  10 -17  275.61   20.97
  -2 -10 -18    5.06    6.25
  -2  10 -18    4.69    4.80
  -2 -10 -18    8.80    4.97
   2 -11 -18   -3.60   18.35
   2  11 -18   15.69    6.09
   2  11 -17   -2.51    5.11
   2  11 -17   10.04    6.67
   2  11 -17   12.10    6.12
   2  11 -16   49.90   11.46
   2  11 -16   56.72    9.74
   2  11 -15   16.54   11.94
   2 -11 -15    7.69    6.57
   2  11 -15   17.13    8.26
   2  11 -14   39.00   14.71
   2  11 -14   53.91   11.04
   2 -11 -14   34.19    9.29
   2  11 -13  204.25   25.51
   2  11 -13  162.19   20.17
   2 -11 -13  185.20   21.47
   2  11 -13  215.70   24.24
   2 -11 -12  357.70   33.63
   2  11 -12  381.49   35.87
   2 -11 -11  677.77   47.59
   2  11 -11  667.95   49.28
   2 -11 -10 1156.43   59.35
   2 -11 -10 1449.47  142.00
   2 -11 -10 1068.15  117.12
   2  11 -10 1263.80   62.11
   2 -11 -10  868.78   54.60
   2 -11 -10 1373.54   50.88
   2  11 -10 1181.04   58.80
  -2  11  10 1106.92  102.69
   2  11 -10 1058.24  125.42
   2  11 -10 1185.53   62.82
   2 -11  -9  840.21   47.24
   2 -11  -9  723.25  100.68
   2  11  -9  876.56   48.16
   2 -11  -9  751.58   95.04
   2 -11  -9  622.22   42.86
   2 -11  -9 1000.92   40.21
   2  11  -9  824.76   46.15
   2  11  -9  882.65   51.64
   2  11  -9 1004.49  114.82
   2 -11  -8  389.10   73.31
   2 -11  -8  435.05   32.45
   2  11  -8  454.08   32.65
   2 -11  -8  466.54   32.91
   2  11  -8  455.96   31.74
   2  11  -8  438.48   74.72
   2  11  -8  490.56   37.25
   2 -11  -7   62.77   12.67
   2 -11  -7   79.30   40.55
   2  11  -7   81.30   14.14
   2  11  -7   56.72   11.67
   2  11  -7   99.02   38.87
  -2  11   7   78.53   26.32
   2  11  -7   53.69   14.69
   2 -11  -6  903.61   45.34
   2 -11  -6  881.91  100.45
   2  11  -6  910.35   46.15
   2  11  -6  810.76   42.14
   2  11  -6  967.53   51.45
   2  11  -6  997.31  101.53
  -2  11   6  860.59   77.48
   2 -11  -5  860.24   94.65
   2  11  -5  806.03   44.55
   2  11  -5  776.52   41.73
   2  11  -5  844.18   49.00
   2  11  -5  661.76   64.40
  -2  11   5  734.48   72.24
   2  11  -5  763.03   87.39
   2  11  -4  349.92   46.21
  -2  11   4  427.93   53.49
  -2 -11   3  349.84   46.36
   2 -11  -3  372.00   60.70
  -2  11   3  303.91   45.34
   2  11  -3  377.10   47.58
  -2 -11   2   32.31   20.73
   2  11  -2   36.55   21.07
  -2  11   2   37.40   20.85
  -2 -11   1   -0.77   17.21
  -2  11   1   34.70   23.71
   2  11  -1   -2.94   19.07
  -2 -11   0   13.50   20.75
   2  11   0    6.58   17.43
  -2  11   0   -7.81   19.24
  -2 -11  -1   70.92   29.24
  -2  11  -1   88.00   27.47
  -2 -11  -2  134.84   38.16
  -2  11  -2  140.70   32.72
  -2  11  -2  120.27   26.33
  -2 -11  -3   33.08   26.50
  -2  11  -3   25.27   16.62
  -2 -11  -4  131.18   38.56
  -2 -11  -4  138.62   37.79
  -2  11  -4  107.96   23.65
  -2 -11  -5  167.26   40.45
  -2 -11  -5  156.75   41.48
  -2  11  -5  224.83   21.65
  -2  11  -5  219.72   46.01
  -2 -11  -6 1157.06  103.81
  -2  11  -6 1381.21   63.47
  -2 -11  -6 1283.96   60.83
  -2 -11  -6 1139.86  106.97
  -2  11  -6 1104.20  106.60
  -2 -11  -6 1244.09   59.85
  -2  11  -6 1147.68   60.96
  -2 -11  -7  428.25   30.68
  -2 -11  -7  285.48   56.55
  -2  11  -7  431.59   30.97
  -2 -11  -7  319.43   55.05
  -2 -11  -7  422.61   28.80
  -2 -11  -7  465.77   34.11
  -2 -11  -7  429.81   30.32
  -2  11  -7  395.45   31.89
  -2  11  -7  439.59   67.30
  -2  11  -7  372.97   27.32
  -2 -11  -8  824.99   88.90
  -2  11  -8  864.24   45.48
  -2 -11  -8  805.58   46.30
  -2 -11  -8  783.21   43.87
  -2 -11  -8  933.22   52.38
  -2 -11  -8  824.63   46.15
  -2  11  -8  744.76   91.80
  -2  11  -8  754.58   47.67
  -2  11  -8  737.66   41.63
  -2 -11  -9  747.47   90.89
  -2 -11  -9  761.03   86.57
  -2 -11  -9  976.80   56.22
  -2 -11  -9  790.37   45.04
  -2 -11  -9  546.70   38.01
  -2 -11  -9  591.69   39.96
  -2  11  -9  821.68   96.98
  -2  11  -9  790.14   47.38
  -2  11  -9  744.34   40.48
  -2 -11 -10  633.08   86.91
  -2  11 -10  641.87   38.44
  -2 -11 -10  672.78   83.91
  -2 -11 -10  787.27   45.38
  -2 -11 -10  545.67   38.13
  -2 -11 -10  823.72   54.93
  -2  11 -10  786.32   99.28
  -2  11 -10  684.54   39.97
  -2  11 -10  685.17   45.41
  -2  11 -11   89.06   13.53
  -2 -11 -11  103.51   16.85
  -2 -11 -11  111.70   15.65
  -2  11 -11  104.26   18.48
  -2  11 -11  110.17   15.79
  -2  11 -12  260.37   23.19
  -2 -11 -12  365.92   46.16
  -2 -11 -12  332.34   29.02
  -2  11 -12  351.20   31.28
  -2  11 -12  314.91   25.78
  -2  11 -13  163.89   17.97
  -2 -11 -13  215.58   23.57
  -2  11 -13  182.33   23.25
  -2  11 -14  227.28   20.45
  -2 -11 -14  284.39   25.98
  -2  11 -14  285.68   26.27
  -2  11 -15  179.13   16.84
  -2 -11 -15  236.49   22.57
  -2  11 -15  224.04   21.97
  -2  11 -16  105.43   11.63
  -2  11 -16   93.37   12.43
  -2 -11 -16   84.74   13.50
  -2  11 -16   82.42   13.02
  -2  11 -17    6.02    5.45
  -2 -11 -17   -2.19    5.90
  -2  11 -17    4.35    6.17
  -2 -11 -18   -6.04    5.64
   2  12 -17   41.22    7.13
   2  12 -17   39.36    8.51
   2  12 -16  229.08   20.20
   2 -12 -16   76.18   33.23
   2  12 -15   22.45   10.64
   2  12 -14  775.31   43.64
   2 -12 -14  583.37   35.08
   2  12 -13   45.85   14.04
   2 -12 -13   18.40    7.85
   2  12 -13   55.59   12.97
   2 -12 -12  207.37   20.67
   2  12 -12  183.75   21.55
   2  12 -11   77.45   15.90
   2 -12 -11   66.98   12.23
   2  12 -11   59.62   13.42
   2 -12 -10  162.48   19.02
   2  12 -10  167.40   21.25
   2 -12 -10  102.30   15.49
   2  12 -10  163.96   18.84
   2  12 -10  114.87   18.68
   2 -12  -9  238.96   64.80
   2 -12  -9  351.41   28.13
   2 -12  -9  304.51   65.20
   2  12  -9  327.57   27.64
   2 -12  -9  224.75   22.95
   2  12  -9  322.89   26.42
   2  12  -9  376.06   31.98
   2  12  -9  261.88   65.08
  -2  12   9  313.24   59.18
   2 -12  -8  -26.34   38.16
   2 -12  -8    5.20    8.07
   2  12  -8   -2.15    8.71
   2 -12  -8   -5.32    7.55
   2  12  -8   18.85    9.66
   2  12  -8   12.72   12.83
   2  12  -8   -0.17   27.09
   2 -12  -7   12.08   32.71
   2 -12  -7   20.84    9.13
   2  12  -7   13.65   10.36
   2  12  -7   23.30    9.30
  -2  12   7   29.28   25.19
   2  12  -7   27.96   12.62
   2  12  -7   20.12   37.03
   2 -12  -6  361.60   28.29
   2 -12  -6  293.81   63.49
   2  12  -6  367.65   29.63
  -2  12   6  305.30   27.46
   2  12  -6  354.42   26.97
  -2  12   6  334.40   51.38
   2  12  -6  275.57   57.03
   2  12  -6  411.34   33.81
   2 -12  -5   19.39   30.68
   2 -12  -5   20.96    8.57
   2  12  -5   27.38   10.50
  -2  12   5   21.41   11.12
   2  12  -5   17.92    8.86
   2  12  -5   19.53   11.03
  -2  12   5    8.43   18.54
   2  12  -5    6.26   25.03
   2 -12  -4  364.67   27.61
   2 -12  -4  279.78   59.30
   2  12  -4  350.01   28.31
  -2  12   4  315.27   29.20
   2  12  -4  333.55   26.33
   2  12  -4  381.85   50.09
  -2  12   4  322.31   50.05
   2  12  -4  378.42   31.30
  -2  12   3  128.94   17.22
   2  12  -3  133.55   17.06
  -2 -12   3  107.38   28.24
   2 -12  -3  128.36   16.06
   2 -12  -3  147.88   44.78
  -2  12   3   91.62   29.31
   2  12  -3   95.35   27.16
   2  12  -3  121.09   17.79
  -2 -12   2  454.48   58.14
   2  12  -2  492.09   32.59
   2 -12  -2  475.16   32.18
   2 -12  -2  521.00   72.24
   2  12  -2  508.48   34.90
  -2  12   2  440.51   56.14
   2  12  -2  540.07   60.78
  -2 -12   1    8.14   18.14
   2  12  -1  -12.33   18.90
  -2  12   1   14.93   19.34
  -2 -12   0 1609.05  118.51
   2  12   0 1648.95  113.72
  -2  12   0 1478.22  107.65
  -2 -12  -1  278.91   50.27
  -2  12  -1  217.91   40.10
   2  12   1  268.57   45.33
  -2  12  -1  263.31   44.55
  -2 -12  -2 1564.76  121.88
  -2  12  -2 1621.44   71.30
  -2  12  -3  104.50   16.25
  -2 -12  -3   95.31   32.87
  -2  12  -3   79.11   22.30
  -2 -12  -4  576.91   74.62
  -2  12  -4  741.85   42.97
  -2 -12  -4  618.58   77.71
  -2 -12  -4  667.40   38.86
  -2  12  -4  619.31   38.78
  -2 -12  -4  593.31   36.70
  -2  12  -4  618.01   58.41
  -2  12  -5    5.33    8.55
  -2 -12  -5   -6.95   20.52
  -2 -12  -5    5.41    6.84
  -2 -12  -5  -25.41   27.47
  -2  12  -5    3.96   22.44
  -2  12  -5    0.66    7.89
  -2 -12  -5    0.55    6.81
  -2 -12  -6  430.81   64.05
  -2  12  -6  493.75   34.27
  -2 -12  -6  382.25   64.09
  -2 -12  -6  412.98   31.16
  -2 -12  -6  449.50   31.28
  -2  12  -6  433.23   68.19
  -2  12  -6  424.07   32.85
  -2 -12  -7   58.53   30.77
  -2 -12  -7  122.05   16.99
  -2  12  -7  102.42   15.25
  -2 -12  -7   80.76   32.14
  -2 -12  -7  149.55   22.68
  -2  12  -7  110.75   17.38
  -2 -12  -7  102.25   14.95
  -2  12  -7  103.07   36.80
  -2 -12  -8  -10.14   24.13
  -2  12  -8    7.51    7.36
  -2 -12  -8   26.13   24.89
  -2 -12  -8   42.13   24.24
  -2 -12  -8   10.45    9.22
  -2 -12  -8    7.75    6.80
  -2  12  -8   34.79   13.97
  -2  12  -8   25.92   29.82
  -2  12  -8   23.03    8.60
  -2 -12  -9    9.14   32.56
  -2 -12  -9   21.40   25.22
  -2 -12  -9   25.67   11.07
  -2 -12  -9   28.49    9.26
  -2  12  -9   31.85   13.66
  -2 -12  -9   33.48   11.06
  -2  12  -9   62.39   42.77
  -2  12  -9   29.87    9.52
  -2  12 -10    6.61    6.69
  -2 -12 -10    0.29    9.81
  -2 -12 -10   10.57    6.82
  -2  12 -10   20.18    9.29
  -2  12 -10    6.68   12.37
  -2  12 -11   -0.55    6.90
  -2 -12 -11    3.04    9.83
  -2 -12 -11    1.04   34.99
  -2 -12 -11    2.14    6.23
  -2  12 -11    8.11   12.57
  -2  12 -12   30.40    8.95
  -2 -12 -12   40.51   13.70
  -2 -12 -12    4.88   37.30
  -2  12 -12   48.14   15.74
  -2  12 -13   21.17    7.58
  -2 -12 -13   13.28   10.75
  -2  12 -13   20.12   12.46
  -2  12 -14  292.77   22.83
  -2 -12 -14  365.21   28.37
  -2  12 -14  358.27   28.99
  -2  12 -15   60.71   10.30
  -2 -12 -15   29.54   10.67
  -2  12 -15   24.51   10.70
  -2 -12 -16  105.00   13.96
  -2  12 -16  114.99   14.02
  -2 -12 -17   -7.82    6.53
  -2  12 -17   -1.36    4.52
   2 -13 -17  -45.10   16.59
   2  13 -17    5.56    4.67
   2  13 -16   23.00    6.62
   2  13 -16   11.86    6.95
   2  13 -15   13.68    9.01
   2 -13 -15  -52.75   28.67
   2  13 -14   -1.76    9.76
   2 -13 -14   -0.86    4.97
   2  13 -13   74.23   15.93
   2 -13 -13   53.64   10.08
   2  13 -13   55.79   11.80
   2  13 -12   29.15   13.22
   2 -13 -12   37.64    9.97
   2  13 -12   22.97   10.31
   2  13 -11 1013.48   53.54
   2  13 -11  950.96   52.75
   2  13 -10    0.76   10.78
   2 -13 -10    3.65    7.05
   2  13 -10    0.23    8.13
   2  13 -10   10.70   11.33
   2 -13  -9  866.09   49.16
   2  13  -9  917.28   50.34
   2  13  -9  937.68   49.49
   2  13  -9  957.11   55.09
   2 -13  -8   97.78   15.61
   2 -13  -8  102.73   42.51
   2  13  -8  147.07   20.09
   2 -13  -8   71.96   13.26
   2  13  -8  123.01   17.60
   2  13  -8   56.79   38.67
   2  13  -8  127.61   21.03
  -2  13   8  158.68   44.99
   2 -13  -7  196.90   21.78
   2 -13  -7  204.05   59.67
   2  13  -7  270.06   26.21
   2  13  -7  214.54   21.97
   2  13  -7  228.31   26.95
   2  13  -7  142.02   52.28
   2 -13  -6   96.31   15.64
   2 -13  -6  117.08   42.48
  -2  13   6   88.57   16.16
   2  13  -6  104.64   17.47
   2  13  -6   96.07   15.34
   2  13  -6  114.45   20.43
  -2  13   6   85.18   33.96
   2  13  -6   76.15   39.75
   2 -13  -5  459.46   32.97
   2 -13  -5  452.75   77.45
   2  13  -5  433.22   34.04
  -2  13   5  435.22   33.63
   2  13  -5  465.25   32.51
   2  13  -5  493.61   38.06
  -2  13   5  412.81   59.85
   2  13  -5  340.85   66.29
   2 -13  -4   95.04   41.75
   2 -13  -4   49.30   11.73
   2  13  -4   66.49   14.97
  -2  13   4   42.54   11.67
   2  13  -4   49.38   12.01
   2  13  -4   45.44   35.06
  -2  13   4   76.89   30.36
   2  13  -4   64.37   15.69
   2  13  -4   31.87   21.58
  -2  13   3  586.29   39.77
   2  13  -3  618.15   39.85
   2 -13  -3  632.29   39.62
   2 -13  -3  647.88   85.89
   2  13  -3  690.89   43.71
   2  13  -3  570.16   66.05
  -2  13   3  624.18   70.72
  -2 -13   2   89.72   29.98
   2  13  -2   97.35   15.24
  -2  13   2   79.88   15.08
   2 -13  -2  105.14   15.59
   2 -13  -2  102.63   39.59
  -2  13   2   67.30   27.31
   2  13  -2   61.38   25.25
  -2 -13   1   34.44   22.17
   2  13  -1   53.40   12.24
  -2  13   1   35.45   11.49
   2 -13  -1   37.04   10.83
   2 -13  -1   41.92   10.33
   2  13  -1   45.54   24.46
  -2  13   1   34.75   21.56
  -2 -13   0  152.94   39.74
   2  13   0  156.08   18.44
  -2  13   0  147.50   18.65
  -2 -13   0  146.32   17.18
   2 -13   0  157.47   17.96
   2  13   0  116.06   31.56
  -2  13   0  104.26   28.03
  -2  13   0  143.28   35.72
  -2  13  -1  193.22   21.63
   2  13   1  183.10   19.66
  -2 -13  -1  216.65   47.51
   2 -13   1  171.36   18.94
  -2 -13  -1  161.35   17.93
   2  13   1  149.56   37.45
  -2  13  -1  175.20   18.84
  -2  13  -1  128.11   35.89
  -2  13  -1  205.75   39.98
   2  13   2   23.94    9.78
  -2  13  -2   27.19   11.24
  -2 -13  -2   22.61   21.45
  -2 -13  -2   21.86    8.69
   2 -13   2   29.22   11.05
  -2  13  -2   23.85   17.77
  -2  13  -2   30.83    9.78
   2  13   2   50.54   24.22
   2  13   3   12.08   10.18
  -2  13  -3    6.36    9.06
  -2 -13  -3   15.22   25.66
  -2 -13  -3    7.19    7.87
  -2 -13  -3   18.57   27.80
   2  13   3   26.61   23.64
  -2  13  -3    0.41    8.02
  -2  13  -3    2.46   15.06
  -2  13  -4    6.26    9.02
  -2 -13  -4    3.82   26.68
  -2 -13  -4   13.94    8.47
  -2 -13  -4   -9.78   20.96
  -2  13  -4   10.58    9.17
  -2 -13  -4   15.50    7.78
  -2  13  -5  602.32   38.85
  -2 -13  -5  551.71   75.56
  -2 -13  -5  420.44   69.55
  -2 -13  -5  522.94   35.32
  -2  13  -5  506.23   36.28
  -2 -13  -5  522.13   34.29
  -2  13  -5  496.42   74.07
  -2  13  -6  102.37   16.51
  -2 -13  -6   57.61   28.76
  -2 -13  -6   52.10   30.95
  -2 -13  -6   66.35   13.42
  -2  13  -6   59.66   34.00
  -2  13  -6   57.65   14.79
  -2 -13  -6   84.35   13.15
  -2 -13  -7 1327.30  120.58
  -2  13  -7 1476.19   70.18
  -2 -13  -7 1456.61   70.28
  -2 -13  -7 1390.42  130.77
  -2 -13  -7 1493.23   68.91
  -2  13  -7 1432.63   72.65
  -2  13  -7 1232.80  124.38
  -2 -13  -8   58.24   35.23
  -2  13  -8   28.95   10.20
  -2 -13  -8   14.70   20.93
  -2 -13  -8   34.27   11.66
  -2 -13  -8    9.51   18.55
  -2  13  -8   27.22   13.53
  -2  13  -8   64.53   37.53
  -2 -13  -9  653.60   41.49
  -2 -13  -9  670.04   46.20
  -2  13  -9  647.10   44.14
  -2  13 -10   14.44    7.44
  -2 -13 -10   16.93   10.72
  -2  13 -10    3.98   12.19
  -2  13 -11  466.60   31.51
  -2 -13 -11  513.29   36.52
  -2  13 -11  477.75   37.46
  -2  13 -12   24.07    8.59
  -2 -13 -12   31.85   12.35
  -2  13 -12   22.33   13.92
  -2 -13 -13  468.36   32.92
  -2  13 -13  514.58   35.35
  -2  13 -14    1.94    6.26
  -2 -13 -14   -3.32    9.27
  -2  13 -14   -0.99    9.76
  -2  13 -15  258.67   18.38
  -2 -13 -15  253.22   21.33
  -2  13 -15  247.36   21.40
  -2 -13 -16    6.26    5.83
  -2  13 -16   -0.02    5.79
  -2 -13 -17   21.03    5.96
   2  14 -16  231.26   16.46
   2 -14 -16  200.12   20.81
   2  14 -15  219.74   19.62
   2 -14 -15  610.25   33.66
   2  14 -14  168.25   17.48
   2 -14 -14   23.67   28.33
   2  14 -13   84.03   14.81
   2 -14 -13   59.56    9.92
   2 -14 -12  202.55   18.98
   2  14 -12  206.78   21.84
   2  14 -11   36.67   12.80
   2 -14 -11   28.83    8.88
   2  14 -11   16.47   11.04
   2  14 -10    4.00   10.73
   2 -14 -10   -1.15    7.34
   2  14 -10    9.12    8.77
   2  14 -10    1.30   10.98
   2 -14  -9    9.96   10.31
   2  14  -9   11.36   10.59
   2 -14  -9   11.24    7.41
   2  14  -9    6.47    8.55
   2  14  -9   17.19   12.47
   2 -14  -8   52.69   13.13
   2  14  -8   27.18   12.94
   2 -14  -8   44.55   11.58
   2  14  -8   49.29   12.70
   2  14  -8   40.75   15.66
   2 -14  -7   15.60    9.65
   2  14  -7   33.20   14.02
   2 -14  -7    9.40    7.11
   2  14  -7   12.32   10.26
   2  14  -7    6.50   12.40
   2 -14  -6   27.51   30.04
   2 -14  -6   65.51   14.28
   2  14  -6   92.51   17.60
  -2  14   6   83.61   15.50
   2  14  -6   83.43   14.83
   2  14  -6   90.90   44.13
  -2  14   6   47.13   33.22
   2  14  -6   99.17   19.86
   2 -14  -5    4.38   31.32
   2 -14  -5    0.30    9.22
   2  14  -5   13.12   12.45
  -2  14   5   11.85   10.26
   2  14  -5    7.26    9.44
   2  14  -5    3.08   26.89
  -2  14   5    9.78   19.07
   2  14  -5    9.07   12.48
   2 -14  -4  612.15   40.89
   2 -14  -4  749.70  100.04
   2  14  -4  688.33   44.40
  -2  14   4  660.47   43.29
   2  14  -4  712.75   43.27
   2  14  -4  720.21   47.38
  -2  14   4  524.09   69.70
   2  14  -4  627.75   87.33
   2  14  -4  531.97   66.64
   2 -14  -3  850.36   49.00
   2 -14  -3  818.90  101.92
   2  14  -3  907.21   51.06
  -2  14   3  781.30   49.08
   2  14  -3  960.53   51.46
   2  14  -3  714.16   77.90
  -2  14   3  727.53   81.50
   2  14  -2  176.49   20.94
  -2  14   2  187.87   22.43
   2 -14  -2  192.60   21.33
   2 -14  -2  199.87   52.73
   2  14  -2  184.97   39.57
  -2  14   2  151.10   38.50
   2  14  -1  434.82   31.68
  -2 -14   1  408.70   61.66
  -2  14   1  361.70   30.76
  -2 -14   1  447.44   31.16
   2 -14  -1  380.10   30.56
  -2  14   1  398.94   57.02
   2  14  -1  349.11   54.41
  -2  14   1  394.08   60.34
  -2  14   0 1132.29   59.66
  -2 -14   0 1107.17  104.17
   2  14   0 1068.59   57.41
   2 -14   0 1155.71   58.54
  -2 -14   0 1207.00   57.97
   2  14   0 1126.37   99.53
  -2  14   0  977.27   93.97
  -2  14   0 1027.55   94.36
  -2 -14  -1  282.67   55.96
   2  14   1  308.15   27.19
  -2  14  -1  328.19   28.71
  -2 -14  -1  340.94   26.90
   2 -14   1  352.85   28.06
   2  14   1  363.63   54.86
  -2  14  -1  327.35   26.27
  -2  14  -1  351.09   53.07
  -2  14  -2  779.90   46.39
  -2 -14  -2  835.28   92.59
   2  14   2  699.24   43.45
  -2 -14  -2  735.41   42.94
   2 -14   2  800.57   44.40
  -2  14  -2  728.16   42.85
   2  14   2  735.88   79.81
  -2  14  -3  674.70   43.72
  -2 -14  -3  719.33   88.18
   2  14   3  686.88   42.45
  -2 -14  -3  766.74   43.42
  -2 -14  -3  681.07   87.13
   2  14   3  560.98   71.72
  -2  14  -3  660.14   41.51
  -2  14  -4  546.05   36.85
  -2 -14  -4  573.95   78.86
  -2 -14  -4  415.03   69.41
  -2 -14  -4  515.07   34.25
  -2  14  -4  462.72   33.88
   2  14   4  413.52   61.69
  -2 -14  -4  336.69   27.85
  -2  14  -4  477.90   73.75
  -2  14  -5   24.58   11.66
  -2 -14  -5    5.80   28.10
  -2 -14  -5   33.58   32.62
  -2 -14  -5   17.32    9.71
   2  14   5    2.54   23.13
  -2 -14  -5   12.08    7.67
  -2  14  -5    6.89   29.22
  -2  14  -5   16.83   11.25
  -2 -14  -6  520.70   73.80
  -2  14  -6  514.61   36.23
  -2 -14  -6  482.38   34.82
  -2 -14  -6  423.25   75.49
  -2  14  -6  487.17   36.49
  -2  14  -6  375.07   69.72
  -2 -14  -7    6.86    9.19
  -2  14  -7   15.96    9.35
  -2  14  -7    9.93    6.66
  -2  14  -7    4.66   10.86
  -2  14  -8   59.52   12.64
  -2 -14  -8   63.49   14.97
  -2  14  -8   67.85   17.01
  -2  14  -9   55.30   11.73
  -2 -14  -9   68.89   15.44
  -2  14  -9   49.17   16.05
  -2  14 -10    0.34    7.17
  -2 -14 -10    1.88   10.09
  -2  14 -10   -4.96   12.96
  -2  14 -11  114.10   14.88
  -2 -14 -11  100.99   17.44
  -2  14 -11   91.39   19.08
  -2  14 -12   91.03   12.95
  -2 -14 -12  112.09   17.75
  -2  14 -12   89.34   17.57
  -2  14 -13   52.93    9.79
  -2 -14 -13   49.76   12.08
  -2  14 -13   58.92   14.43
  -2  14 -14  156.33   14.32
  -2 -14 -14  140.28   16.28
  -2  14 -14  154.38   17.92
  -2 -14 -15   74.60   10.86
  -2  14 -15  101.36   13.24
  -2 -14 -16  155.62   13.44
  -2  14 -16  162.80   13.65
   2  15 -15   17.61    6.50
   2 -15 -15   -1.77   12.92
   2  15 -14   55.31   10.63
   2 -15 -14  259.69   23.86
   2  15 -13  100.10   15.26
   2 -15 -13  144.40   24.68
   2  15 -12  285.37   24.05
   2 -15 -12  238.58   19.26
   2  15 -11  170.30   19.96
   2 -15 -11  138.85   16.03
   2  15 -10  320.93   27.04
   2 -15 -10  268.98   22.79
   2  15 -10  297.80   24.21
   2 -15  -9  122.35   17.44
   2  15  -9  110.92   17.46
   2 -15  -9   97.62   14.83
   2  15  -9  117.76   16.72
   2  15  -9  127.62   20.86
   2 -15  -8  522.03   36.58
   2  15  -8  586.48   37.17
   2  15  -8  566.53   42.47
   2 -15  -7  138.33   19.67
   2  15  -7  146.95   21.73
   2 -15  -7   97.12   14.96
   2  15  -7  137.58   18.74
   2  15  -7  136.91   23.27
   2 -15  -6  318.92   28.77
  -2  15   6  318.34   27.90
   2  15  -6  369.59   32.98
   2  15  -6  326.37   28.39
   2  15  -6  376.08   35.13
   2 -15  -5    8.08    9.41
  -2  15   5   12.96   10.78
   2  15  -5   16.38   12.29
   2  15  -5   15.53   11.04
   2 -15  -4  188.76   56.09
   2 -15  -4  185.98   21.47
  -2  15   4  197.46   22.97
   2  15  -4  195.58   23.84
   2  15  -4  179.57   21.77
   2  15  -4  167.88   53.04
  -2  15   4  132.88   41.62
  -2  15   4  126.79   39.63
   2 -15  -3   69.06   46.29
   2 -15  -3   86.27   15.88
  -2  15   3   91.81   17.21
   2  15  -3   88.35   17.15
   2  15  -3   91.47   16.69
  -2  15   3   40.97   25.23
  -2  15   3   66.65   30.59
   2  15  -3   50.99   28.11
   2  15  -2  119.87   18.33
  -2  15   2  123.42   19.00
   2 -15  -2  132.85   18.73
   2 -15  -2  111.37   44.26
  -2  15   2   72.37   34.29
   2  15  -2  104.36   34.00
  -2  15   2  109.85   38.42
   2  15  -1   -2.12    9.57
  -2  15   1    6.72   10.16
   2 -15  -1    3.33   30.56
  -2 -15   1   36.70   10.99
   2 -15  -1    5.56    9.63
  -2  15   1  -15.29   26.98
   2  15  -1    3.46   20.05
  -2  15   1   14.49   25.64
  -2 -15   0   37.88   30.44
   2  15   0   13.48   10.83
  -2  15   0   10.26   12.28
   2 -15   0    3.94    9.14
  -2 -15   0    0.70    7.94
  -2  15   0   -7.62   27.40
   2  15   0    2.91   20.04
  -2  15   0   22.72   25.75
  -2 -15  -1  102.28   41.25
   2  15   1   65.50   14.07
  -2  15  -1   77.10   16.19
  -2 -15  -1   78.51   14.69
   2 -15   1   66.76   13.77
  -2  15  -1   89.55   14.85
   2  15   1   62.46   30.05
  -2  15  -1   85.12   29.48
  -2 -15  -2   21.24   31.97
   2  15   2   -1.06    8.88
  -2  15  -2    7.86   10.22
  -2 -15  -2   20.39    9.62
  -2 -15  -2   -7.41   25.97
  -2  15  -2    1.78    8.10
   2  15   2   -5.60   22.95
  -2  15  -2   -3.05   25.12
  -2 -15  -3   -2.91   27.36
   2  15   3  -10.66    9.64
  -2  15  -3   -5.11   10.88
  -2 -15  -3   14.30   10.26
  -2 -15  -3  -19.30   32.59
  -2 -15  -3    5.17    6.50
   2  15   3   30.62   23.11
  -2  15  -3   12.11    9.45
  -2 -15  -4  254.62   57.45
  -2  15  -4  220.59   24.51
  -2 -15  -4  181.57   51.12
  -2 -15  -4  236.88   23.18
   2  15   4  196.75   44.98
  -2  15  -4  218.67   23.17
  -2  15  -4  210.56   57.23
  -2 -15  -4  154.81   17.88
  -2  15  -5   30.71   12.11
  -2 -15  -5   24.54   11.16
  -2  15  -5   21.37   11.56
  -2 -15  -6  362.55   29.61
  -2  15  -6  361.90   29.71
  -2  15  -6  341.63   30.37
  -2  15  -7   72.69   14.57
  -2  15  -7   95.31   13.00
  -2  15  -7  103.14   18.83
  -2  15  -8  381.65   29.87
  -2  15  -8  436.75   35.77
  -2  15  -9   23.14    8.67
  -2  15  -9   22.33    8.47
  -2 -15  -9   34.82   13.63
  -2  15  -9   19.06   14.70
  -2  15 -10  295.85   24.08
  -2 -15 -10  337.78   29.02
  -2  15 -10  323.86   30.18
  -2  15 -11    4.03    6.49
  -2 -15 -11    2.24   11.23
  -2  15 -11   -6.05   13.40
  -2  15 -12  382.95   25.65
  -2 -15 -12  391.28   28.95
  -2  15 -12  396.20   30.86
  -2  15 -13  158.45   14.78
  -2 -15 -13  151.48   16.82
  -2  15 -13  157.46   18.52
  -2  15 -14  335.20   20.08
  -2 -15 -14  280.63   21.39
  -2  15 -14  335.67   24.13
  -2 -15 -15   17.08    6.26
  -2  15 -15   20.48    6.74
   2  16 -15  230.91   14.93
   2 -16 -14    0.72   11.36
   2  16 -14   -3.44    5.43
   2 -16 -13  218.75   20.20
   2  16 -13  197.89   17.60
   2 -16 -12  137.77   20.11
   2  16 -12   19.48    8.75
   2 -16 -11  282.74   25.40
   2 -16 -11  200.41   18.09
   2  16 -11  256.10   22.37
   2 -16 -10    5.10    5.30
   2  16 -10    5.49    7.53
   2  16 -10    2.59    9.76
   2 -16  -9   10.30    9.26
   2 -16  -9    1.37    7.73
   2  16  -9   13.31    9.30
   2  16  -9   11.52   10.60
   2 -16  -8   51.87   13.36
   2  16  -8   51.78   13.27
   2 -16  -7   23.50   11.04
   2 -16  -7   18.31    8.65
   2  16  -7   49.08   13.11
   2  16  -7   21.49   13.22
   2 -16  -6   -3.63   10.24
   2  16  -6    0.59   10.18
   2  16  -6   -4.04   11.73
  -2  16   6    7.84    8.54
   2 -16  -5  139.39   19.85
   2  16  -5  156.42   20.25
   2  16  -5  165.37   23.06
  -2  16   5  176.16   21.05
   2 -16  -4    0.87    9.61
   2  16  -4   -7.76   11.18
   2  16  -4   -0.46   11.63
  -2  16   4   -7.16   11.01
   2 -16  -3  188.61   22.55
   2  16  -3  233.89   24.89
  -2  16   3  239.77   25.94
   2  16  -3  210.50   24.37
   2 -16  -2   92.35   17.08
   2  16  -2  102.28   17.20
  -2  16   2  114.28   19.26
   2  16  -2   85.41   17.17
   2  16  -1  574.44   40.69
  -2  16   1  612.56   42.59
  -2 -16   1  699.81   41.73
   2 -16  -1  633.95   41.92
   2  16   0   34.51   13.41
  -2  16   0   25.50   13.45
  -2 -16   0   39.64   11.46
   2 -16   0   35.30   12.66
  -2  16  -1  950.86   54.26
   2  16   1  882.78   52.07
   2 -16   1  855.61   51.28
  -2 -16  -1  940.81   51.34
  -2  16  -1  920.26   49.26
   2  16   2   58.69   14.01
  -2  16  -2   55.37   15.44
   2 -16   2   59.09   14.12
  -2 -16  -2   56.61   12.39
  -2  16  -2   50.33   12.08
   2  16   3 1171.17   59.13
  -2  16  -3 1101.74   59.70
   2 -16   3 1048.78   57.46
  -2 -16  -3 1131.34   57.95
  -2  16  -3 1081.03   56.90
  -2 -16  -3  995.24   52.91
  -2  16  -4   27.18   12.87
  -2 -16  -4   22.76   10.51
  -2  16  -4   27.27   12.07
  -2  16  -5  387.95   31.60
  -2 -16  -5  403.56   31.14
  -2  16  -5  341.79   30.26
  -2 -16  -6   17.38    9.38
  -2  16  -6   21.93   10.73
  -2  16  -6   11.57    6.20
  -2  16  -6   16.09   11.16
  -2  16  -7  233.57   22.92
  -2 -16  -7  228.15   24.62
  -2  16  -7  207.57   19.00
  -2  16  -7  211.63   25.10
  -2  16  -8    4.50    8.06
  -2 -16  -8   -1.25   10.90
  -2  16  -8   17.88   13.45
  -2  16  -9   65.11   11.46
  -2  16  -9   86.06   13.60
  -2 -16  -9   96.36   16.30
  -2  16  -9   85.95   18.19
  -2  16 -10   34.68    9.43
  -2  16 -10   29.69    8.37
  -2 -16 -10   52.27   12.92
  -2  16 -10   28.40   13.99
  -2  16 -11   49.43    9.57
  -2 -16 -11   66.15   13.40
  -2  16 -11   63.62   15.13
  -2  16 -12    2.40    5.34
  -2 -16 -12   10.23    8.06
  -2  16 -12   -0.22    9.28
  -2  16 -13  217.68   15.59
  -2 -16 -13  174.80   16.26
  -2  16 -13  168.94   17.47
  -2 -16 -14    4.12    4.76
  -2  16 -14    5.51    5.99
  -2 -16 -15   72.99    8.29
   2  17 -14   60.40    7.56
   2  17 -13   26.86    6.97
   2  17 -13   19.21    5.70
   2  17 -12  219.85   18.00
   2  17 -11   15.08    8.21
   2 -17 -10  452.75   27.91
   2  17 -10  462.33   30.40
   2  17  -9  257.80   21.87
   2  17  -9  311.07   24.37
   2 -17  -8  362.33   27.57
   2  17  -8  364.57   26.98
   2  17  -8  370.69   28.26
   2 -17  -7  165.80   19.76
   2 -17  -7  123.31   16.05
   2  17  -7  163.87   19.62
   2 -17  -6  385.01   30.79
   2 -17  -6  301.25   25.94
   2  17  -6  397.84   30.82
   2  17  -6  431.08   33.94
  -2  17   6  396.53   28.76
   2 -17  -5   47.32   13.53
   2  17  -5   55.59   14.10
   2  17  -5   41.59   14.97
  -2  17   5   42.83   12.27
   2 -17  -4  157.36   20.30
   2  17  -4  136.46   19.30
   2  17  -4  184.96   22.50
  -2  17   4  133.99   19.49
   2 -17  -3  226.62   24.62
   2  17  -3  283.01   26.37
   2  17  -3  258.34   26.38
  -2  17   3  224.67   24.92
   2 -17  -2  149.25   20.45
   2  17  -2  170.27   20.77
   2  17  -2  157.02   21.29
  -2  17   2  149.74   20.97
  -2 -17   1    5.87    7.87
   2 -17  -1   11.60   10.97
   2  17  -1    9.84   10.06
   2  17  -1    8.21   11.19
  -2  17   1   11.21   11.85
   2  17   0   33.56   12.79
  -2  17   0   22.68   13.60
  -2 -17   0   48.76   11.84
   2 -17   0   18.97   11.74
   2  17   1   -1.25   10.42
  -2  17  -1   -4.15   12.10
  -2 -17  -1    4.68    8.04
   2 -17   1   -3.37   10.12
   2  17   2  113.61   18.11
  -2  17  -2  142.75   20.68
   2 -17   2  129.12   18.10
  -2 -17  -2  128.08   17.62
  -2 -17  -2  105.07   14.29
   2  17   3  191.10   20.67
  -2  17  -3  153.26   21.62
   2 -17   3  155.59   20.64
  -2 -17  -3  169.72   20.14
  -2  17  -3  160.79   19.68
  -2  17  -4  186.13   22.62
  -2 -17  -4  207.32   21.83
   2 -17   4  183.27   21.69
  -2  17  -4  179.54   20.65
  -2 -17  -5   36.55   11.38
   2 -17   5   33.44   11.91
  -2  17  -5   24.27   11.56
  -2  17  -5   29.10    9.41
  -2  17  -5   27.29   13.02
  -2  17  -6  257.97   24.23
  -2  17  -6  193.79   18.59
  -2  17  -6  252.92   24.99
  -2  17  -7   59.20   12.87
  -2 -17  -7   63.32   14.99
  -2  17  -7   68.95   10.75
  -2  17  -7   52.72   14.58
  -2  17  -8  308.25   24.54
  -2 -17  -8  331.41   27.51
  -2  17  -8  305.98   28.00
  -2  17  -9  298.57   22.57
  -2 -17  -9  305.10   25.33
  -2  17  -9  341.53   28.51
  -2  17 -10  267.14   20.81
  -2  17 -10  286.07   20.32
  -2 -17 -10  299.97   24.12
  -2  17 -10  305.04   26.68
   2 -17  11  129.54   14.21
  -2  17 -11  123.38   13.07
  -2 -17 -11  120.08   14.76
  -2  17 -11  149.21   17.78
  -2  17 -12  103.56   10.77
  -2 -17 -12   77.14   11.15
  -2  17 -12  108.19   14.36
  -2 -17 -13   16.46    6.03
  -2  17 -13   23.10    7.89
  -2 -17 -14   74.03    8.08
   2  18 -12   90.74   10.19
   2  18 -12  114.55   11.25
   2  18 -11   21.32    7.49
   2  18 -10   20.33    7.98
   2 -18  -9   28.32    7.19
   2  18  -9   20.93    7.85
   2  18  -9   26.23    9.57
   2 -18  -8   -3.49    8.83
   2 -18  -8   -0.77    5.49
   2  18  -8    2.25    7.99
   2  18  -8    2.74    8.34
   2 -18  -7   75.59   13.54
   2 -18  -7   71.77   11.51
   2  18  -7   95.10   14.43
   2 -18  -6   33.39   11.89
   2 -18  -6   17.90    8.21
   2  18  -6   20.20   10.53
  -2  18   6   16.16    8.25
   2 -18  -5   27.57   11.44
   2  18  -5   23.48   11.23
   2  18  -5   20.28   13.03
  -2  18   5   11.54    8.42
   2 -18  -4   63.20   14.56
   2  18  -4   84.53   15.78
   2  18  -4   72.19   16.47
  -2  18   4   75.04   14.82
   2 -18  -3   36.52   13.19
   2  18  -3   39.59   12.88
  -2  18   3   42.33   14.83
   2  18  -3   49.08   14.31
   2 -18  -2  413.77   32.77
   2  18  -2  471.88   33.41
  -2  18   2  405.31   33.14
   2  18  -2  481.21   34.82
  -2 -18   1  236.02   22.63
   2 -18  -1  209.18   23.02
   2  18  -1  182.04   21.12
   2  18  -1  209.55   23.60
  -2  18   1  202.65   23.91
  -2 -18   0  376.81   28.84
   2 -18   0  320.57   28.20
   2  18   0  322.20   27.65
   2  18   0  343.27   29.40
  -2  18   0  326.20   29.56
   2 -18   1  212.88   23.35
  -2 -18  -1  260.61   23.69
   2  18   1  190.24   20.99
  -2  18  -1  205.16   23.91
   2  18   1  213.70   23.72
   2 -18   2  129.43   18.32
  -2 -18  -2  161.76   19.07
   2  18   2  147.86   19.36
  -2  18  -2  143.81   20.75
  -2 -18  -3   60.23   12.77
   2 -18   3   77.62   15.49
  -2  18  -3   82.05   17.06
   2  18   3   59.82   12.80
  -2 -18  -4  398.90   29.72
   2 -18   4  368.89   29.73
  -2  18  -4  411.49   31.78
  -2  18  -4  401.53   28.45
   2 -18   5   30.31   11.67
  -2 -18  -5   30.50   11.24
  -2  18  -5   25.97   12.09
  -2  18  -5   22.39    8.37
  -2  18  -5   14.95   10.23
   2 -18   6  322.76   26.10
  -2  18  -6  299.88   25.44
  -2 -18  -6  320.43   27.23
  -2  18  -6  237.39   19.97
  -2  18  -6  295.57   25.82
   2 -18   7   14.75    9.59
  -2  18  -7   15.27    8.80
  -2 -18  -7   21.07   10.51
  -2  18  -7   12.68    6.23
  -2  18  -7    3.64   10.25
   2 -18   8    3.87    8.80
  -2  18  -8    7.04    6.39
  -2  18  -8   -3.24    7.28
  -2 -18  -8    3.24    8.96
  -2  18  -8    9.11   10.72
   2 -18   9   -6.49    7.47
  -2  18  -9    3.11    5.72
  -2  18  -9   -3.70    6.12
  -2 -18  -9   -2.97    8.37
  -2  18  -9   -2.26    9.50
   2 -18  10    9.55    6.21
  -2  18 -10    4.32    5.66
  -2 -18 -10    6.78    7.13
  -2  18 -10    8.33    9.14
   2 -18  11   26.91    7.43
  -2  18 -11   10.61    4.97
  -2 -18 -11   21.28    7.20
  -2  18 -11    5.14    8.07
  -2 -18 -12    2.48    4.47
   2  19 -11  279.18   17.64
   2  19 -10   29.84    7.28
   2  19  -9  352.21   23.09
   2 -19  -8   -0.18    4.38
   2  19  -8   -1.34    6.19
   2  19  -8   -2.88    7.18
   2 -19  -7  398.34   26.93
   2 -19  -7  382.39   24.59
   2  19  -7  383.38   26.05
   2  19  -7  400.67   26.69
   2 -19  -6   11.37    8.43
   2 -19  -6   23.42    7.45
   2  19  -6    5.56    7.68
   2 -19  -5  369.74   27.66
   2 -19  -5  361.16   25.14
   2  19  -5  381.63   27.28
  -2  19   5  346.16   24.55
   2 -19  -4   45.38   12.12
   2  19  -4   73.02   13.91
   2  19  -4   45.13   12.47
  -2  19   4   42.91   11.19
   2 -19  -3   98.93   16.38
   2  19  -3  104.18   15.98
   2  19  -3  106.62   16.80
  -2  19   3   91.20   14.56
   2 -19  -2   -1.30    9.39
   2  19  -2   -1.93    9.05
   2  19  -2    5.88   10.37
  -2  19   2   -6.68    9.18
   2 -19  -1  206.73   21.96
   2  19  -1  185.75   19.89
   2  19  -1  201.57   21.90
  -2  19   1  188.65   21.68
   2 -19   0   12.93   10.24
  -2 -19   0   -3.28    7.66
   2  19   0    6.22    8.62
   2  19   0   12.84   10.28
  -2  19   0    9.50   11.25
  -2 -19  -1   39.18   10.85
   2 -19   1   32.65   12.32
   2  19   1   29.27   10.56
   2  19   1   31.65   11.23
  -2  19  -1   33.04   12.23
   2 -19   2   17.60   10.98
  -2 -19  -2   23.63    9.78
   2  19   2   14.62    8.94
  -2  19  -2   22.89   11.79
   2  19   2   11.34    9.40
   2 -19   3  158.57   19.00
  -2 -19  -3  162.36   18.07
   2  19   3  161.71   18.04
  -2  19  -3  163.34   17.50
  -2  19  -3  165.27   20.20
   2 -19   4   22.69   10.25
  -2  19  -4   33.05    9.16
   2  19   4   18.13    8.45
  -2  19  -4   19.06   11.03
   2 -19   5  343.50   25.98
  -2  19  -5  323.36   22.81
   2  19   5  296.77   23.17
  -2  19  -5  334.69   26.25
   2 -19   6   18.48    8.93
   2  19   6    3.43    6.47
  -2 -19  -6   10.75    9.54
  -2  19  -6    3.51    5.27
  -2  19  -6    6.13    8.26
   2 -19   7  253.46   21.07
  -2 -19  -7  250.86   21.50
  -2  19  -7  249.31   17.53
  -2  19  -7  254.79   20.84
   2 -19   8   15.81    7.85
  -2 -19  -8   13.69    7.57
  -2  19  -8   10.86    6.39
  -2  19  -8   14.13    6.59
   2 -19   9  373.16   23.04
  -2 -19  -9  388.97   24.61
  -2  19  -9  358.23   22.07
  -2 -19 -10   22.55    6.68
  -2  19 -10   11.82    4.99
  -2 -19 -11  405.44   22.25
   2  20 -10    0.80    4.16
   2  20  -9    5.20    4.96
   2  20  -8   -0.68    5.23
   2  20  -7   20.06    6.91
   2  20  -7   18.72    7.17
   2 -20  -6   51.11    9.83
   2  20  -6   35.31    8.34
   2 -20  -6   41.47    7.56
   2  20  -6   54.98    9.96
   2 -20  -5    1.30    7.79
   2 -20  -5    0.66    4.73
   2  20  -5   -1.64    7.12
  -2  20   5   -0.38    5.23
   2 -20  -4  207.52   19.10
   2 -20  -4  186.31   16.23
   2  20  -4  195.10   18.19
  -2  20   4  190.31   17.04
   2 -20  -3  278.53   22.56
   2  20  -3  258.75   21.45
  -2  20   3  247.07   20.70
   2 -20  -2  230.26   21.20
   2  20  -2  224.56   20.04
  -2  20   2  220.50   20.69
   2 -20  -1   66.46   12.97
   2  20  -1   75.73   13.16
  -2  20   1   76.67   13.52
   2 -20   0  333.45   26.18
   2  20   0  370.37   26.00
  -2  20   0  385.34   28.06
   2 -20   1   57.54   12.30
  -2 -20  -1   69.10   11.29
   2  20   1   58.53   11.38
  -2  20  -1   52.50   12.53
  -2 -20  -2  277.33   21.02
   2 -20   2  226.37   20.73
  -2  20  -2  225.97   20.06
   2  20   2  228.62   19.93
  -2  20  -2  232.57   22.22
   2 -20   3  229.06   20.18
  -2  20  -3  196.89   17.77
   2  20   3  197.03   18.32
  -2  20  -3  217.20   20.94
   2 -20   4  224.30   19.84
   2  20   4  202.74   18.01
  -2  20  -4  194.81   16.74
  -2  20  -4  195.86   19.58
   2 -20   5   13.33    7.90
  -2 -20  -5   18.53    8.26
  -2  20  -5   22.10    6.87
   2  20   5   11.44    6.47
  -2  20  -5   13.32    8.30
   2 -20   6  176.17   16.23
  -2 -20  -6  198.40   17.47
  -2  20  -6  150.13   13.03
   2  20   6  169.88   14.22
  -2  20  -6  174.49   16.56
   2 -20   7   12.72    6.79
  -2 -20  -7    9.32    6.44
  -2  20  -7    3.23    4.89
  -2  20  -7   15.12    6.67
   2 -20   8   17.51    5.93
  -2 -20  -8   21.58    7.05
  -2  20  -8   26.78    6.04
  -2 -20  -9   -2.35    4.06
  -2 -20 -10    0.55    3.27
   2  21  -8  267.41   16.02
   2  21  -7  146.60   12.08
   2  21  -6  162.73   13.44
   2  21  -6  154.46   13.32
   2 -21  -5   51.06    8.93
   2  21  -5   62.91    9.64
   2  21  -5   60.00    9.10
   2 -21  -4   81.68   11.14
   2 -21  -4   69.02    8.51
   2  21  -4   76.67   10.56
  -2  21   4   79.67    9.22
   2 -21  -3  128.08   13.45
   2 -21  -3  113.33   11.16
   2  21  -3  138.85   13.76
  -2  21   3  116.27   12.21
   2 -21  -2   23.39    7.79
   2  21  -2   27.58    8.37
  -2  21   2   27.15    8.30
   2 -21  -1    0.69    6.36
   2  21  -1    8.91    7.14
  -2  21   1   -1.96    7.47
   2 -21   0   18.77    7.72
  -2  21   0   13.73    7.07
   2  21   0   10.44    6.67
  -2  21   0   12.42    7.62
   2 -21   1   -0.02    6.28
  -2  21  -1   -3.28    6.11
   2  21   1    5.53    6.42
  -2  21  -1    9.01    8.12
   2 -21   2   18.19    7.85
   2  21   2    5.84    6.35
  -2  21  -2   12.09    6.35
  -2  21  -2   17.18    8.52
   2 -21   3    3.96    6.72
   2  21   3    7.84    6.28
  -2  21  -3    3.78    5.28
  -2  21  -3    0.19    6.93
   2 -21   4   30.81    7.50
  -2 -21  -4   27.94    8.10
  -2  21  -4   16.04    5.43
   2  21   4   42.95    7.84
  -2  21  -4   28.32    8.22
   2 -21   5   33.65    7.46
  -2 -21  -5   40.44    8.25
  -2  21  -5   24.00    5.56
   2  21   5   30.82    6.51
  -2  21  -5   31.84    7.97
   2 -21   6   46.48    7.59
  -2 -21  -6   50.96    8.31
  -2  21  -6   49.97    7.35
  -2  21  -6   53.59    8.28
  -2 -21  -7   86.90    9.62
  -2 -21  -8  104.69    9.49
  -2  22   5   45.16    6.68
   2  22  -5   32.72    5.99
  -2  22   4   21.52    5.80
   2  22  -4   18.79    5.49
   2  22  -4   15.06    5.04
   2 -22  -3  208.56   14.90
  -2  22   3  197.84   14.72
   2  22  -3  218.71   15.14
   2 -22  -2    9.39    5.06
  -2  22   2    9.03    5.17
   2  22  -2    7.75    4.85
  -2  22   2    7.26    4.95
   2 -22  -1  291.60   18.69
   2  22  -1  312.51   18.85
  -2  22   1  288.69   18.45
  -2  22   1  260.39   17.89
   2 -22   0   15.39    5.74
   2  22   0   13.43    5.68
  -2  22   0   15.24    5.67
  -2  22   0   12.69    5.73
   2 -22   1  206.95   15.25
   2  22   1  195.65   14.58
  -2  22  -1  207.11   14.79
  -2  22  -1  204.07   15.90
   2 -22   2   24.45    6.26
  -2 -22  -2   28.66    6.69
   2  22   2   20.22    5.62
  -2  22  -2   21.36    5.39
  -2  22  -2   22.10    6.51
   2 -22   3  186.16   13.91
  -2 -22  -3  213.60   14.91
  -2  22  -3  165.43   12.26
   2  22   3  176.14   12.70
  -2  22  -3  216.82   15.76
  -2 -22  -4   23.11    5.72
  -2  22  -4   22.17    4.83
  -2  22  -4   29.88    6.84
  -2 -22  -5  257.78   16.01
  -2  22  -5  280.40   16.65
   3   0 -20    7.70    6.76
   3   0 -20    2.33    5.92
   3   0 -19   11.32    8.72
   3   0 -19    8.68    7.81
   3   0 -19   11.81    7.31
   3   0 -18   -8.62    9.61
   3   0 -18    1.07    8.31
   3   0 -18   -0.64    9.97
   3   0 -18  -22.75    6.37
   3   0 -17   43.65   14.33
   3   0 -17   23.79   12.98
   3   0 -17   37.11   14.59
   3   0 -17   35.25   12.30
   3   0 -16   -5.15   11.28
   3   0 -16    1.87    9.65
   3   0 -16   12.82   12.72
   3   0 -16    1.42   11.10
   3   0 -16   -3.84   11.47
   3   0 -16    0.28   11.87
   3   0 -15   57.11   14.54
   3   0 -15   47.02   14.14
   3   0 -15   74.46   16.12
   3   0 -15   46.91   13.56
   3   0 -15   40.32   12.40
   3   0 -15   87.52   17.02
   3   0 -14   -6.21   10.46
   3   0 -14   -0.35    9.40
   3   0 -14    1.46    9.72
   3   0 -14    2.40   10.36
   3   0 -14   -4.47    8.91
   3   0 -14  -11.94   11.92
   3   0 -13  887.67   50.79
   3   0 -13  887.43   49.50
   3   0 -13  821.48   48.63
   3   0 -13  867.55   49.03
   3   0 -13  911.99   50.56
   3   0 -13  920.42   48.46
   3   0 -13  887.82   49.20
   3   0 -12   -5.13    7.05
   3   0 -12    2.20    7.48
   3   0 -12   -5.99    8.51
   3   0 -12   -1.34    6.70
   3   0 -12    2.43    7.94
   3   0 -12   -3.75    7.91
   3   0 -12    1.62    7.73
   3   0 -11 2543.49  103.87
   3   0 -11 2490.51   99.73
   3   0 -11 2472.25  101.83
   3   0 -11 2490.05  102.50
   3   0 -11 2474.81  101.47
   3   0 -11 2584.38  102.98
   3   0 -10   -3.31   15.48
   3   0  -9  846.21   65.05
   3   0  -9  905.27   67.45
   3   0  -8    8.48   12.51
   3   0  -8   29.33   25.00
   3   0  -8   -2.97   12.45
   3   0  -7 1829.78  100.53
   3   0  -7 1966.24   98.16
   3   0  -7 1908.22  115.52
  -3   0   7 2002.90   85.96
   3   0  -6    1.29   16.62
   3   0  -6   -2.35   13.60
   3   0  -6    3.97    9.50
  -3   0   6   -5.19    7.27
   3   0  -5 2170.25  102.93
   3   0  -5 2140.65  113.24
   3   0  -5 2222.67   96.74
  -3   0   5 2114.76   93.84
   3   0  -4    3.53   15.55
   3   0  -4   -4.18   11.37
   3   0  -4   -1.62    6.23
  -3   0   4   -1.25    9.28
   3   0  -3   40.05   12.83
   3   0  -3   28.94    7.20
   3   0  -3   49.16   13.78
  -3   0   3   28.14   12.03
   3   0  -2    2.00    9.20
   3   0  -2   -1.69    9.30
  -3   0   2    4.13    9.97
   3   0  -1   28.32   10.05
   3   0  -1   25.43   10.87
  -3   0   1   37.49   13.20
   3   0   0   -2.16    6.69
   3   0   0    0.97    7.69
  -3   0   0   -3.34   12.04
   3   0   1  130.83   13.13
   3   0   1  145.13   15.59
  -3   0  -1  149.38   19.79
   3   0   2    1.38    3.44
  -3   0  -2   -2.26   10.75
  -3   0  -3  539.94   31.53
  -3   0  -3  521.75   37.59
  -3   0  -4   -1.10    8.48
  -3   0  -4   -6.15   10.49
  -3   0  -5 1114.59   67.70
  -3   0  -5  934.07   55.56
  -3   0  -6   -5.77   15.64
  -3   0  -6    1.97   11.98
  -3   0  -7 3460.65  160.65
  -3   0  -7 3514.73  154.63
  -3   0  -8    3.31   13.10
  -3   0  -8   -8.01   13.31
  -3   0  -9 1804.07  114.08
  -3   0  -9 2342.35  120.29
  -3   0 -10   -7.07   14.88
  -3   0 -11 1610.98   70.86
  -3   0 -11 1454.57   67.18
  -3   0 -11 1359.02   66.37
  -3   0 -11 1755.02  119.23
  -3   0 -11 1513.08   68.47
  -3   0 -12    1.91    7.94
  -3   0 -12   -6.98    8.79
  -3   0 -12    8.26    7.86
  -3   0 -12   -1.88    7.00
  -3   0 -12   -4.22    7.07
  -3   0 -13 2942.75  116.22
  -3   0 -13 2728.34  114.03
  -3   0 -13 3144.85  181.51
  -3   0 -13 2824.71  114.03
  -3   0 -13 2543.02  109.50
  -3   0 -14   -4.70    9.25
  -3   0 -14   -1.90   11.20
  -3   0 -14  -28.67   26.24
  -3   0 -14    5.62    9.79
  -3   0 -14    2.99    7.47
  -3   0 -15   62.19   13.82
  -3   0 -15   55.42   14.94
  -3   0 -15   67.61   14.49
  -3   0 -15   55.40   10.97
  -3   0 -16    6.34    9.45
  -3   0 -16   -3.73   11.96
  -3   0 -16    0.15    8.82
  -3   0 -17  328.36   29.10
  -3   0 -17  278.99   24.60
  -3   0 -18    3.85   10.85
  -3   0 -18    6.31    8.37
  -3   0 -19   14.54   10.56
  -3   0 -19    4.89    8.77
  -3   0 -19   13.50    7.30
  -3   0 -20    1.30    6.33
  -3   0 -20   -2.02    5.19
  -3   0 -20   -2.60    5.34
   3   1 -20  156.52   15.08
   3  -1 -20  150.22   15.15
   3   1 -20  169.04   15.72
   3   1 -19  117.19   14.87
   3  -1 -19  101.40   14.61
   3   1 -19  106.52   13.56
   3  -1 -19  103.28   12.90
   3   1 -19   94.11   14.61
   3  -1 -19  107.35   15.20
   3  -1 -18  498.69   32.15
   3   1 -18  503.67   32.84
   3  -1 -18  524.56   33.37
   3   1 -18  510.40   33.31
   3   1 -18  441.23   29.22
   3  -1 -18  521.91   29.94
   3   1 -17  222.58   23.60
   3  -1 -17  227.71   24.06
   3   1 -17  187.93   22.00
   3  -1 -17  194.83   22.48
   3   1 -17  216.38   23.39
   3  -1 -17  212.93   22.30
   3  -1 -17  211.04   20.90
   3   1 -17  199.82   21.17
   3   1 -16  663.99   43.64
   3  -1 -16  646.88   43.08
   3   1 -16  592.39   40.43
   3  -1 -16  681.47   43.35
   3  -1 -16  652.64   41.26
   3   1 -16  716.72   43.88
   3  -1 -16  587.52   42.29
   3  -1 -16  681.88   41.33
   3   1 -16  694.66   42.56
   3  -1 -16  725.55   44.05
   3   1 -15   61.18   14.57
   3  -1 -15   79.98   16.03
   3  -1 -15   66.08   15.44
   3   1 -15   43.54   12.84
   3  -1 -15   45.42   14.67
   3   1 -15   52.07   15.03
   3  -1 -15   47.61   13.02
   3   1 -15   53.75   14.30
   3   1 -15   56.23   13.32
   3  -1 -15   60.16   15.12
   3   1 -15   71.40   15.95
   3  -1 -15   61.36   15.58
   3   1 -14  165.24   20.60
   3  -1 -14  179.75   22.25
   3  -1 -14  191.50   21.67
   3   1 -14  179.25   21.65
   3  -1 -14  155.61   20.39
   3   1 -14  172.41   20.83
   3  -1 -14  191.50   22.61
   3   1 -14  190.72   21.75
   3   1 -14  186.38   22.24
   3  -1 -14  171.77   20.55
   3   1 -14  175.73   20.38
   3   1 -14  189.80   21.95
   3  -1 -14  180.67   21.47
   3  -1 -13  341.70   29.29
   3   1 -13  324.38   27.93
   3   1 -13  362.30   28.93
   3  -1 -13  334.37   27.68
   3   1 -13  329.36   27.75
   3  -1 -13  314.60   27.12
   3   1 -13  333.53   27.97
   3  -1 -13  313.02   27.15
   3   1 -13  356.10   28.76
   3  -1 -13  332.11   28.52
   3   1 -13  339.03   27.11
   3   1 -13  320.69   27.71
   3  -1 -13  332.99   27.71
   3   1 -12  753.04   43.56
   3  -1 -12  736.16   43.76
   3  -1 -12  692.37   41.55
   3   1 -12  653.36   40.81
   3  -1 -12  672.53   41.09
   3  -1 -12  712.76   42.06
   3   1 -12  716.08   42.70
   3  -1 -12  760.90   43.90
   3   1 -12  706.95   42.06
   3  -1 -12  708.10   40.06
   3   1 -12  653.69   63.86
   3   1 -12  751.33   42.75
   3  -1 -12  709.75   41.76
   3   1 -12  742.13   41.35
   3  -1 -11   -3.04    6.67
   3  -1 -11    4.41    6.70
   3   1 -11    9.31    7.87
   3   1 -11    2.79    7.68
   3  -1 -11    3.68    7.63
   3  -1 -11    1.54    7.16
   3   1 -11    8.70   14.97
   3   1 -11   -6.64   19.23
   3   1 -11    1.48    6.99
   3   1 -11    1.69    7.03
   3  -1 -11   -0.04    6.80
   3  -1 -11   -1.65    7.00
   3   1 -11    7.83    7.96
   3  -1 -11    1.23    8.21
   3   1 -11    9.01    8.67
   3  -1 -10 1231.76  103.50
   3   1 -10 1138.81   81.51
   3   1 -10 1120.55   81.62
   3  -1  -9   15.10   22.10
   3  -1  -9   -3.90   14.21
   3   1  -9    4.24   14.45
   3   1  -9   -0.58   12.79
   3  -1  -8    1.38   20.91
   3  -1  -8    9.80   14.15
   3   1  -8   -6.33   15.15
   3   1  -8    6.98   12.50
   3   1  -7   30.18   19.94
   3  -1  -7   14.50   14.10
   3   1  -7   19.53   14.09
   3  -1  -7   30.71   23.86
   3   1  -7   53.44   16.23
  -3   1   7   23.44   10.51
   3  -1  -6   63.46   26.70
   3   1  -6   54.60   21.88
   3  -1  -6   76.66   20.22
   3   1  -6   59.27   19.29
   3   1  -6   80.92   15.96
  -3   1   6   82.94   15.04
  -3  -1   6   73.86   13.21
  -3  -1   5  244.95   19.93
   3  -1  -5  263.06   30.67
   3   1  -5  280.36   30.58
   3   1  -5  309.35   35.80
   3   1  -5  287.85   26.24
  -3   1   5  254.41   26.18
  -3  -1   5  296.49   24.68
   3  -1  -4   36.77   13.70
   3   1  -4   50.40   15.62
   3   1  -4   43.64   10.83
   3   1  -4   38.93   14.31
   3   1  -4   27.28   11.99
  -3   1   4   45.53   13.04
  -3  -1   4   42.44   12.09
   3   1  -3    8.66   10.92
   3  -1  -3   -3.67   12.08
   3   1  -3    5.12   11.39
   3   1  -3    7.41    6.63
   3   1  -3    3.41   10.21
  -3   1   3    1.38   10.60
  -3  -1   3    5.39    8.63
   3   1  -2  143.27   18.90
   3  -1  -2  137.12   19.28
   3   1  -2  130.14   17.76
   3   1  -2  119.39   11.13
   3   1  -2  132.30   18.04
  -3   1   2  145.84   20.75
  -3  -1   2  146.12   19.05
   3  -1  -1 2644.94  103.29
   3   1  -1 2476.27  101.39
   3   1  -1 2493.62   86.12
   3  -1  -1 2502.95  103.53
   3   1  -1 2647.50  104.76
   3  -1  -1 2530.78   99.99
  -3   1   1 2587.15  108.29
  -3  -1   1 2646.50  106.71
   3  -1   0 1054.53   49.70
   3  -1   0  992.98   50.82
  -3   1   0 1099.40   57.35
  -3  -1   0 1137.42   57.68
  -3   1  -1  310.15   14.92
   3  -1   1  301.63   22.27
  -3   1  -1  298.48   27.58
  -3  -1  -1  346.09   29.13
  -3   1  -2 2156.56   80.39
   3  -1   2 1964.90   81.18
  -3   1  -2 2237.80   93.95
  -3  -1  -2 2142.34   94.50
  -3  -1  -3    6.00   14.46
   3   1   3    8.50    3.06
  -3   1  -3    6.35    6.82
   3  -1   3    2.22    4.73
  -3   1  -3   -0.63   10.48
  -3  -1  -3   -5.56   11.24
  -3  -1  -4  894.47   60.19
  -3   1  -4  762.39   45.94
   3  -1   4  876.45   37.29
  -3   1  -4  953.97   52.96
  -3  -1  -5  319.16   36.28
  -3   1  -5  248.36   25.73
   3  -1   5  273.23   15.34
  -3   1  -5  307.97   28.74
  -3   1  -6  746.08   56.46
  -3  -1  -6  772.10   59.33
  -3   1  -6  793.92   52.70
  -3  -1  -7  180.25   31.34
  -3   1  -7  183.58   29.96
  -3   1  -7  213.44   28.59
  -3   1  -8  563.44   53.12
  -3  -1  -8  716.90   61.47
  -3   1  -8  707.22   56.48
  -3   1  -9   16.74   13.81
  -3   1  -9   -7.99   12.73
  -3  -1  -9   14.56   14.45
  -3  -1 -10   41.98   19.87
  -3   1 -10   50.76   18.80
  -3   1 -11  150.00   17.85
  -3  -1 -11  186.32   19.48
  -3   1 -11  129.83   29.76
  -3  -1 -11  165.58   18.24
  -3   1 -11  147.98   17.03
  -3  -1 -11  167.88   18.12
  -3   1 -11  196.87   39.94
  -3   1 -11  166.89   18.28
  -3   1 -11  161.28   17.26
  -3  -1 -11  156.34   17.20
  -3  -1 -12  213.01   21.91
  -3   1 -12  211.06   21.66
  -3   1 -12  183.39   20.23
  -3  -1 -12  205.91   20.80
  -3  -1 -12  190.66   20.29
  -3   1 -12  249.29   47.06
  -3  -1 -12  198.66   20.48
  -3   1 -12  207.65   20.52
  -3   1 -12  205.00   21.20
  -3  -1 -12  249.13   45.49
  -3  -1 -12  211.72   19.81
  -3   1 -13   40.34   11.71
  -3  -1 -13   48.43   12.80
  -3  -1 -13    6.87    8.30
  -3   1 -13   18.66   10.21
  -3  -1 -13   41.96   12.94
  -3   1 -13   35.05   12.03
  -3  -1 -13   32.09    9.79
  -3  -1 -13   44.89   26.61
  -3   1 -13  -15.38   23.66
  -3   1 -13   34.21   10.19
  -3  -1 -14   25.42   11.29
  -3   1 -14   17.07   10.01
  -3   1 -14   19.49   10.35
  -3  -1 -14    7.60   10.02
  -3  -1 -14   22.65    8.53
  -3   1 -14   26.40   10.02
  -3   1 -14  -10.81   22.10
  -3   1 -14   13.70    9.57
  -3  -1 -14   13.99    8.67
  -3   1 -15   65.51   13.79
  -3  -1 -15   54.19   13.85
  -3  -1 -15   52.22   14.36
  -3   1 -15   49.73   13.76
  -3   1 -15   58.24   14.69
  -3  -1 -15   50.13   12.92
  -3  -1 -15   68.19   12.12
  -3   1 -15   45.22   10.73
  -3   1 -16  209.89   21.59
  -3  -1 -16  230.08   23.29
  -3   1 -16  244.24   25.51
  -3  -1 -16  192.29   23.28
  -3   1 -16  259.38   24.62
  -3  -1 -16  217.36   22.20
  -3   1 -16  151.31   17.88
  -3  -1 -17  229.30   24.91
  -3   1 -17  252.36   25.89
  -3   1 -17  216.76   21.40
  -3  -1 -17  225.69   22.09
  -3   1 -18  451.32   33.15
  -3  -1 -18  471.49   33.42
  -3   1 -18  443.98   29.12
  -3  -1 -18  457.39   30.52
  -3  -1 -19  202.70   18.98
  -3   1 -19  225.54   20.11
  -3  -1 -19  215.50   20.54
  -3   1 -19  203.62   17.36
  -3  -1 -19  233.30   19.18
  -3   1 -20  225.37   17.12
  -3  -1 -20  194.18   14.40
  -3  -1 -20  217.97   16.86
  -3   1 -20  227.78   16.68
  -3   1 -20  193.03   14.88
  -3  -1 -20  196.36   15.69
   3   2 -20   78.94   10.82
   3   2 -20   75.90   10.93
   3   2 -19   72.05   13.50
   3  -2 -19   62.27   12.87
   3  -2 -19   75.56   14.05
   3   2 -19   62.77   13.05
   3   2 -19   88.59   13.62
   3   2 -18   57.29   13.39
   3  -2 -18   70.58   14.45
   3   2 -18   59.61   13.18
   3   2 -18   77.38   15.02
   3  -2 -18   93.35   10.08
   3  -2 -18   62.79   14.37
   3  -2 -18   63.13   11.96
   3   2 -17  109.02   17.63
   3  -2 -17   94.12   16.63
   3  -2 -17  106.33   14.95
   3  -2 -17   99.53   16.72
   3  -2 -17  108.05   18.33
   3   2 -17  113.92   19.61
   3   2 -17  118.61   18.50
   3   2 -16    9.51   10.92
   3  -2 -16   16.83   11.94
   3  -2 -16   32.79   15.22
   3   2 -16   16.85    9.95
   3  -2 -16   20.11   10.35
   3   2 -16   30.04   14.55
   3   2 -16   20.76   12.22
   3  -2 -16   16.78   12.13
   3   2 -16   45.93   12.34
   3  -2 -16    9.15   11.68
   3  -2 -16   33.77   14.38
   3  -2 -15   11.01   10.97
   3  -2 -15   21.18   12.43
   3   2 -15    7.29    8.15
   3   2 -15   13.79   10.76
   3   2 -15   19.27   12.34
   3  -2 -15    6.11    8.72
   3   2 -15    8.57   11.39
   3  -2 -15   26.65   13.41
   3  -2 -15   -3.48   11.55
   3   2 -15    6.07    7.17
   3   2 -15   24.59   13.50
   3  -2 -15    8.73   11.62
   3   2 -15    9.94   10.60
   3  -2 -14  131.44   19.93
   3   2 -14  136.83   18.59
   3  -2 -14  127.50   18.05
   3   2 -14  109.70   16.93
   3   2 -14  116.29   16.55
   3   2 -14  113.35   18.00
   3  -2 -14  106.99   17.67
   3   2 -14  140.36   19.36
   3  -2 -14  137.81   19.09
   3  -2 -14  144.32   18.52
   3  -2 -14  140.43   20.18
   3   2 -14  107.43   16.72
   3   2 -14  143.05   19.32
   3   2 -14  142.38   19.39
   3  -2 -14  129.63   18.50
   3  -2 -13   58.40   13.65
   3   2 -13   79.12   13.91
   3  -2 -13   70.64   13.74
   3   2 -13   75.75   14.28
   3  -2 -13   81.47   14.47
   3  -2 -13   75.36   14.11
   3  -2 -13   85.11   15.33
   3   2 -13   63.86   13.42
   3   2 -13   69.70   14.53
   3   2 -13   57.71   13.31
   3  -2 -13   79.91   14.68
   3   2 -13   63.10   13.57
   3   2 -12  293.70   25.42
   3  -2 -12  332.78   27.68
   3  -2 -12  312.24   25.80
   3   2 -12  287.10   25.23
   3  -2 -12  378.87   27.83
   3   2 -12  289.45   25.66
   3  -2 -12  294.72   26.04
   3   2 -12  309.74   25.82
   3  -2 -12  316.76   25.94
   3   2 -12  267.22   41.98
   3  -2 -12  314.66   25.90
   3   2 -12  317.05   25.49
   3   2 -12  324.58   26.54
   3   2 -12  320.13   49.74
   3  -2 -11  623.33   36.72
   3   2 -11  589.47   36.66
   3  -2 -11  639.96   38.90
   3   2 -11  604.25   36.35
   3   2 -11  609.62   62.80
   3   2 -11  567.67   58.23
   3   2 -11  640.63   37.33
   3  -2 -11  576.86   35.39
   3   2 -11  580.76   36.03
   3  -2 -11  579.50   36.10
   3  -2 -11  582.97   36.18
   3  -2 -11  596.99   37.08
   3   2 -11  591.29   36.93
   3   2 -10  883.25   71.01
   3   2 -10  932.24   75.02
   3  -2 -10  948.22   92.71
   3   2  -9  540.59   52.49
   3  -2  -9  516.83   63.76
   3   2  -9  620.41   55.14
   3   2  -8  892.59   67.40
   3  -2  -8 1006.90   86.60
   3   2  -8  976.91   66.93
  -3   2   8  965.76   56.67
   3   2  -7  801.79   59.29
   3  -2  -7  730.04   70.75
   3   2  -7  745.13   54.25
  -3   2   7  768.42   49.84
   3  -2  -6  811.14   57.29
   3   2  -6  788.65   56.73
   3   2  -6  800.09   52.23
  -3   2   6  790.55   51.30
   3  -2  -5 1121.25   66.24
  -3  -2   5 1059.47   48.11
   3   2  -5 1130.47   66.09
   3   2  -5 1029.93   57.72
   3  -2  -5 1035.08   73.34
   3   2  -5 1046.26   64.01
  -3  -2   5 1055.10   53.65
  -3   2   5 1111.64   62.98
   3   2  -5 1060.08   68.86
  -3  -2   4 1809.07   79.88
   3  -2  -4 1889.43   91.65
   3   2  -4 1929.41   91.00
   3   2  -4 1886.31   92.52
   3   2  -4 1861.18   89.96
   3  -2  -4 1891.15   99.02
   3   2  -4 1874.77   92.68
  -3   2   4 2028.18   92.84
  -3  -2   4 1859.24   82.79
  -3  -2   3  322.25   26.80
   3  -2  -3  299.04   29.56
   3   2  -3  332.16   29.10
   3   2  -3  354.65   30.66
   3  -2  -3  332.47   33.13
   3   2  -3  342.18   29.76
   3   2  -3  321.91   16.46
  -3   2   3  355.28   32.78
  -3  -2   3  346.43   27.84
  -3  -2   2  230.51   24.16
   3  -2  -2  224.42   23.74
   3   2  -2  225.47   20.32
   3   2  -2  254.95   25.24
   3  -2  -2  225.29   24.83
   3   2  -2  203.03   20.06
  -3   2   2  262.41   28.31
  -3  -2   2  248.77   24.11
   3   2  -1   80.16    9.65
  -3  -2   1   66.25   16.46
   3  -2  -1   58.63   12.72
  -3   2   1   59.37   17.78
   3   2  -1   65.74   10.37
  -3  -2   1   72.43   15.73
  -3  -2   0   38.32   15.62
   3  -2   0   24.43    9.26
  -3   2   0   19.00   12.71
  -3  -2   0   25.67   12.73
  -3  -2  -1    2.51   12.71
  -3   2  -1    5.75   11.71
  -3   2  -1    8.33    5.45
  -3  -2  -2  326.43   33.96
  -3  -2  -2  289.73   18.30
  -3   2  -2  307.31   22.24
  -3   2  -2  325.04   28.82
  -3  -2  -3   10.92   15.95
  -3  -2  -3   22.77    7.96
  -3   2  -3   10.57   11.27
  -3   2  -3    0.56    8.25
  -3  -2  -4  187.98   29.49
  -3   2  -4  187.08   23.57
  -3   2  -4  183.68   22.40
  -3  -2  -5   97.87   24.09
  -3   2  -5  114.41   18.23
  -3  -2  -6 2760.80  139.64
  -3   2  -6 2940.80  129.71
  -3   2  -6 2969.44  124.94
  -3   2  -7 1180.63   75.97
  -3  -2  -7 1161.45   81.76
  -3   2  -7 1277.38   75.98
  -3   2  -8  542.43   51.17
  -3  -2  -8  719.64   63.61
  -3   2  -8  746.26   57.84
  -3   2  -9  670.50   58.75
  -3  -2  -9  531.80   57.65
  -3   2  -9  721.90   61.38
  -3  -2 -10  707.32   69.38
  -3   2 -10  845.87   70.50
  -3  -2 -11  224.51   21.68
  -3   2 -11  234.39   38.96
  -3   2 -11  255.69   22.51
  -3  -2 -11  280.97   23.81
  -3  -2 -11  166.46   24.00
  -3   2 -11  225.31   21.39
  -3  -2 -11  237.40   21.55
  -3   2 -11  272.79   48.20
  -3   2 -11  245.54   22.83
  -3  -2 -11  211.76   20.34
  -3   2 -11  236.06   21.94
  -3   2 -12  901.60   81.80
  -3   2 -12  939.89   49.21
  -3  -2 -12  888.38   49.22
  -3  -2 -12  859.48   48.34
  -3   2 -12  823.74   47.47
  -3  -2 -12  812.00   46.82
  -3   2 -12  891.82   85.30
  -3  -2 -12  835.82   84.82
  -3   2 -12  892.42   49.71
  -3  -2 -12  799.29   46.18
  -3   2 -12  897.00   48.25
  -3   2 -13  130.38   17.32
  -3  -2 -13  161.45   19.93
  -3  -2 -13  146.88   18.43
  -3   2 -13  127.13   17.97
  -3  -2 -13  126.83   18.01
  -3   2 -13  142.47   36.01
  -3  -2 -13  149.75   38.89
  -3   2 -13  134.04   18.83
  -3  -2 -13  131.51   17.10
  -3   2 -13  142.50   18.30
  -3   2 -14  489.73   33.97
  -3  -2 -14  508.14   36.05
  -3   2 -14  487.94   36.18
  -3  -2 -14  513.47   36.68
  -3   2 -14  511.84   36.50
  -3  -2 -14  503.73   34.44
  -3   2 -14  449.56   33.06
  -3   2 -15  348.20   28.08
  -3  -2 -15  442.74   32.41
  -3   2 -15  377.13   31.59
  -3  -2 -15  377.43   32.08
  -3   2 -15  412.69   32.17
  -3   2 -15  311.07   26.81
  -3  -2 -15  335.66   27.57
  -3  -2 -16   46.76   13.61
  -3   2 -16   58.77   12.07
  -3   2 -16   61.13   16.95
  -3  -2 -16   55.92   15.59
  -3   2 -16   59.44   14.81
  -3   2 -16   46.36   12.54
  -3  -2 -17    5.43   11.14
  -3   2 -17    8.75   11.62
  -3   2 -17    9.97    8.63
  -3  -2 -17    7.10   10.73
  -3   2 -18   27.16   12.96
  -3  -2 -18    7.29   10.43
  -3   2 -18    4.00    6.42
  -3  -2 -18    4.56    8.54
  -3  -2 -19   13.12    9.82
  -3  -2 -19   20.45    6.83
  -3   2 -19    8.49    7.75
  -3  -2 -19    7.94    7.67
  -3   2 -19    7.91    6.28
  -3  -2 -19   16.81    8.24
  -3  -2 -20    7.51    6.93
  -3   2 -20    1.68    5.60
  -3   2 -20    0.23    5.52
  -3  -2 -20    4.26    6.15
  -3   2 -20    4.20    4.50
  -3  -2 -20   -0.19    5.38
   3   3 -20    4.27    5.48
   3   3 -20   -2.29    5.92
   3   3 -19  388.23   28.46
   3  -3 -19  426.12   29.66
   3   3 -19  348.91   27.85
   3   3 -19  419.38   28.35
   3   3 -18    5.91    9.49
   3  -3 -18    1.62    9.47
   3   3 -18    1.56   10.06
   3   3 -18   -0.96    9.93
   3  -3 -18    7.50    9.85
   3  -3 -18    8.18    8.01
   3  -3 -17  423.47   31.25
   3   3 -17  431.37   31.98
   3   3 -17  467.59   33.28
   3  -3 -17  386.31   28.67
   3  -3 -17  313.33   25.06
   3   3 -17  416.45   31.76
   3  -3 -17  409.83   31.62
   3   3 -16   -4.56   12.09
   3  -3 -16   -0.60   11.22
   3  -3 -16    7.08    7.57
   3   3 -16   18.43   12.21
   3  -3 -16    5.22   10.73
   3   3 -16   -0.28   11.37
   3  -3 -16  -36.76   10.07
   3  -3 -16   -2.35   11.93
   3   3 -16   -0.47    6.62
   3  -3 -16   13.85   11.19
   3   3 -16   -1.96   10.12
   3  -3 -15 1064.91   58.67
   3   3 -15  758.59   49.50
   3  -3 -15 1057.70   56.26
   3   3 -15 1152.40   58.44
   3   3 -15 1111.20   57.50
   3   3 -15 1131.57   57.59
   3  -3 -15  807.14   49.55
   3  -3 -15 1022.93   53.77
   3   3 -15  818.44   50.36
   3  -3 -15 1064.24   57.16
   3   3 -15 1093.01   56.34
   3  -3 -15 1067.75   54.77
   3  -3 -14   -0.74    8.71
   3  -3 -14    5.35   10.14
   3   3 -14   -2.67    8.53
   3  -3 -14    8.28   11.04
   3   3 -14    4.49   10.33
   3   3 -14    0.48   11.38
   3  -3 -14    1.70    9.72
   3   3 -14    1.20    7.04
   3  -3 -14    2.00    8.54
   3   3 -14   23.64   11.81
   3  -3 -14   10.13   10.23
   3   3 -14   12.52   11.02
   3  -3 -13  565.41   39.07
   3   3 -13  489.63   35.04
   3  -3 -13  549.74   36.75
   3  -3 -13  507.37   35.89
   3  -3 -13  483.48   34.55
   3  -3 -13  533.15   35.00
   3   3 -13  490.10   35.51
   3   3 -13  528.77   36.84
   3  -3 -13  555.16   38.63
   3   3 -13  552.06   36.05
   3   3 -13  605.93   37.69
   3   3 -13  519.98   61.56
   3   3 -13  519.64   65.89
   3   3 -13  494.35   34.73
   3  -3 -13  498.95   34.83
   3  -3 -12   85.49   14.40
   3  -3 -12   66.84   13.77
   3   3 -12   92.92   14.24
   3   3 -12   85.08   14.33
   3  -3 -12   78.33   14.10
   3  -3 -12   81.65   14.65
   3  -3 -12  101.39   14.92
   3   3 -12   82.99   14.75
   3   3 -12   83.03   14.19
   3  -3 -12   75.23   13.62
   3   3 -12  100.52   14.97
   3   3 -12   69.33   22.82
   3   3 -12   59.01   25.79
   3  -3 -11  122.47   15.73
   3   3 -11  130.57   16.15
   3  -3 -11  113.79   16.35
   3   3 -11  112.20   15.48
   3  -3 -11  142.82   41.00
   3   3 -11  129.18   16.42
   3  -3 -11  119.26   15.37
   3   3 -11  138.29   30.97
   3   3 -11  141.93   32.65
   3  -3 -11  137.27   16.55
   3  -3 -11  150.64   17.82
   3   3 -11  127.37   16.09
   3  -3 -11  130.25   15.86
   3   3 -11  131.82   16.93
   3   3 -10   52.22   22.00
   3  -3 -10   55.50   31.75
   3   3 -10   41.04   17.28
   3   3  -9   56.83   21.29
   3   3  -9   65.74   20.55
   3  -3  -9   66.77   31.78
   3  -3  -8   37.04   27.37
   3   3  -8   -3.10   13.92
   3   3  -8   -2.52   12.64
  -3   3   8   23.62   12.40
   3  -3  -7   51.50   25.49
   3   3  -7   65.59   20.79
   3   3  -7   73.89   18.77
  -3   3   7   56.03   15.38
   3   3  -6   99.51   22.09
   3  -3  -6  109.76   27.96
   3   3  -6   79.08   18.99
   3   3  -6   80.65   23.84
  -3   3   6   87.66   19.52
   3   3  -5 1705.08   88.42
   3  -3  -5 1743.53  102.72
   3   3  -5 1739.00   97.40
  -3   3   5 1781.86   91.41
  -3  -3   4    2.06    7.26
   3   3  -4    1.92   12.41
   3  -3  -4   -1.85   15.83
  -3   3   4   11.95   14.70
   3   3  -4  -17.15   13.81
  -3   3   4    0.80    5.77
  -3  -3   3 1429.16   71.28
   3   3  -3 1507.94   76.69
   3  -3  -3 1456.32   82.25
   3   3  -3 1490.32   61.84
   3   3  -3 1499.95   77.61
  -3   3   3 1561.22   82.37
  -3  -3   2  722.13   48.63
   3  -3  -2  805.83   52.88
   3   3  -2  825.04   48.83
  -3   3   2  897.90   57.28
  -3  -3   1 1193.71   66.65
   3  -3  -1 1173.72   64.24
  -3   3   1 1299.89   70.29
  -3  -3   0  510.77   41.14
   3  -3   0  479.51   34.87
  -3   3   0  510.29   39.51
  -3  -3  -1 2821.02  129.53
  -3   3  -1 2977.63  124.37
  -3  -3  -2   21.56   17.05
  -3  -3  -2   16.11    8.03
  -3   3  -2   16.10   12.51
  -3   3  -2   24.56   10.05
  -3  -3  -3 1495.30   86.07
  -3  -3  -3 1480.07   70.39
  -3   3  -3 1530.85   74.88
  -3   3  -3 1620.71   77.24
  -3  -3  -4    3.46   15.76
  -3  -3  -4   -2.19    8.58
  -3   3  -4   15.12   11.27
  -3   3  -4    1.13   10.59
  -3  -3  -5 2375.42  127.05
  -3  -3  -5 2459.96  114.56
  -3   3  -5 2742.45  124.50
  -3   3  -5 2673.73  112.79
  -3  -3  -6  515.83   51.34
  -3   3  -6  635.73   53.01
  -3   3  -6  537.80   39.69
  -3  -3  -7 1721.20  101.19
  -3   3  -7 1724.92   89.97
  -3  -3  -8   -5.75   15.26
  -3   3  -8   -3.48   11.81
  -3   3  -8   -3.44   12.06
  -3  -3  -9  107.43   28.19
  -3   3  -9  112.93   24.57
  -3   3  -9  107.76   24.72
  -3  -3 -10    0.53   15.62
  -3   3 -10    4.84   13.29
  -3   3 -10   -4.00   18.93
  -3  -3 -11   12.97    7.82
  -3   3 -11    7.01    7.85
  -3   3 -11   24.02   17.63
  -3   3 -11   17.34    9.83
  -3  -3 -11    6.08    7.85
  -3  -3 -11  -15.56   22.83
  -3  -3 -11   11.08    7.75
  -3   3 -11   28.69   22.89
  -3  -3 -11   18.36    8.43
  -3   3 -11   28.40   10.86
  -3   3 -11    9.74    7.96
  -3   3 -12    7.15    7.53
  -3  -3 -12   20.39    9.24
  -3   3 -12   10.59   17.04
  -3   3 -12    5.91    8.21
  -3  -3 -12    0.95    8.19
  -3  -3 -12    1.13    8.01
  -3  -3 -12    9.25    8.08
  -3   3 -12   14.27   20.76
  -3  -3 -12    6.75   21.45
  -3   3 -12    5.36    7.87
  -3   3 -12   15.45    9.70
  -3   3 -13  530.57   65.91
  -3   3 -13  559.55   34.90
  -3  -3 -13  521.56   36.25
  -3  -3 -13  551.38   37.15
  -3   3 -13  487.60   35.37
  -3  -3 -13  488.42   34.92
  -3   3 -13  508.77   63.70
  -3   3 -13  503.79   35.48
  -3  -3 -13  695.47   78.20
  -3   3 -13  511.90   36.62
  -3  -3 -13  353.14   29.80
  -3  -3 -14   14.47   10.68
  -3   3 -14   15.07    8.42
  -3   3 -14   18.77   11.99
  -3  -3 -14    3.11    9.68
  -3  -3 -14    5.14    6.18
  -3   3 -14    8.98   10.25
  -3   3 -14   23.02   10.90
  -3   3 -15  292.14   24.32
  -3  -3 -15  330.33   28.70
  -3   3 -15  333.25   29.66
  -3  -3 -15  314.38   28.73
  -3   3 -15  310.82   28.39
  -3  -3 -15  242.89   22.93
  -3   3 -15  315.89   27.08
  -3   3 -16   51.73   11.34
  -3  -3 -16   47.65   14.09
  -3   3 -16   73.88   16.19
  -3  -3 -16   40.48   13.74
  -3   3 -16   52.85   14.34
  -3   3 -16   56.49   12.98
  -3   3 -17  731.20   45.48
  -3  -3 -17  788.85   46.18
  -3   3 -17  683.63   38.87
  -3  -3 -17  756.22   44.16
  -3  -3 -18    7.06    9.89
  -3   3 -18    3.85    6.23
  -3  -3 -18   11.75    9.11
  -3  -3 -19  992.19   46.05
  -3   3 -19  959.79   45.40
  -3  -3 -19  984.56   48.08
  -3   3 -19  857.13   41.30
  -3  -3 -19 1023.88   46.86
  -3  -3 -20    7.18    6.14
  -3   3 -20   -7.89    6.50
  -3   3 -20    5.48    5.60
  -3  -3 -20   -5.01    4.94
  -3  -3 -20    0.03    5.53
   3   4 -20   65.44    9.67
   3   4 -20   97.49   11.21
   3   4 -19   82.26   14.99
   3   4 -19   83.47   15.20
   3   4 -19   95.85   16.31
   3   4 -18   78.51   15.12
   3  -4 -18  112.79   16.84
   3   4 -18   82.02   16.26
   3  -4 -18   87.83   15.87
   3   4 -18   87.02   15.73
   3  -4 -18   45.34   21.99
   3  -4 -17   -3.38   10.08
   3   4 -17    4.72   10.77
   3   4 -17   -1.50   12.30
   3  -4 -17    9.25    8.19
   3  -4 -17   -7.60   11.53
   3   4 -16    1.07   10.37
   3  -4 -16   13.99   11.57
   3   4 -16   10.32   10.77
   3   4 -16    7.21   12.40
   3  -4 -16  -26.51    9.50
   3  -4 -16    0.45   11.02
   3  -4 -16   16.48   11.76
   3  -4 -16   11.19    8.26
   3  -4 -16   12.44   11.02
   3   4 -16    9.64   12.00
   3  -4 -15    6.37   12.87
   3   4 -15   15.98    8.68
   3  -4 -15   16.33   10.58
   3  -4 -15    7.79    7.94
   3   4 -15   18.30   12.74
   3  -4 -15    2.81    9.67
   3   4 -15   19.85   13.48
   3   4 -15    4.35    6.71
   3  -4 -15    4.02   10.18
   3  -4 -15    9.03    9.68
   3   4 -15   15.20   10.79
   3  -4 -14   45.80   12.79
   3   4 -14   38.43   10.59
   3  -4 -14   49.09   14.50
   3  -4 -14   29.02    9.38
   3  -4 -14   42.91   13.61
   3   4 -14   63.64   14.74
   3  -4 -14   49.38   13.45
   3   4 -14   49.78   14.96
   3   4 -14   31.04    9.80
   3  -4 -14   47.44   12.73
   3   4 -14   53.58   13.93
   3  -4 -13   37.09   11.89
   3  -4 -13   44.17   12.82
   3   4 -13   32.86   10.05
   3   4 -13   49.36   13.11
   3  -4 -13   36.78   11.85
   3  -4 -13   46.28   12.42
   3   4 -13   40.76   13.53
   3   4 -13   31.94    9.21
   3  -4 -13   25.51    8.36
   3  -4 -13   36.81   11.01
   3   4 -13   29.95   12.29
   3   4 -13   35.09   19.30
   3   4 -13   42.20   25.30
   3  -4 -12  455.20   33.09
   3   4 -12  385.45   29.26
   3  -4 -12  398.63   30.11
   3  -4 -12  382.47   29.87
   3   4 -12  401.36   30.00
   3  -4 -12  385.65   29.45
   3  -4 -12  412.16   28.62
   3  -4 -12  432.77   32.95
   3   4 -12  425.47   31.66
   3   4 -12  444.84   31.56
   3   4 -12  361.37   49.48
   3   4 -12  413.35   57.09
   3  -4 -12  399.05   68.87
   3   4 -12  379.39   29.11
   3  -4 -12  404.02   29.74
   3  -4 -11  261.74   24.11
   3  -4 -11  249.58   22.30
   3   4 -11  250.88   22.08
   3  -4 -11  241.76   49.93
   3   4 -11  258.21   22.92
   3   4 -11  261.07   41.45
   3   4 -11  232.79   21.77
   3  -4 -11  249.20   22.08
   3   4 -11  247.84   42.54
   3  -4 -11  247.49   22.07
   3  -4 -11  259.81   21.92
   3   4 -11  231.18   21.86
   3  -4 -11  258.53   23.58
   3   4 -11  280.63   24.58
   3  -4 -11  251.81   22.84
   3   4 -10  708.43   65.20
   3  -4 -10  606.80   77.57
   3   4 -10  640.74   64.77
   3   4  -9  189.34   33.07
   3  -4  -9  147.28   41.44
   3   4  -9  152.08   30.50
   3  -4  -8 1102.98   98.49
   3   4  -8 1113.19   80.29
   3   4  -8 1253.99   82.37
  -3   4   8 1168.32   74.47
   3   4  -8 1097.60   92.31
   3   4  -7  559.51   51.60
   3   4  -7  500.91   46.37
   3  -4  -7  508.64   60.75
  -3   4   7  508.60   46.49
   3   4  -7  536.26   59.45
   3   4  -6 1298.27   76.25
   3  -4  -6 1306.22   93.96
   3   4  -6 1247.03   89.02
  -3   4   6 1312.75   79.36
   3   4  -5  563.45   45.40
   3  -4  -5  567.02   56.96
  -3   4   5  602.83   50.60
   3   4  -5  605.77   54.78
  -3   4   5  575.61   36.13
  -3  -4   4 2275.33   97.07
   3   4  -4 2352.64  107.70
   3  -4  -4 2185.42  118.81
   3   4  -4 2135.22   89.80
   3   4  -4 2331.94  115.18
  -3   4   4 2194.39  111.43
  -3   4   4 2247.99   93.88
  -3  -4   3  860.59   52.17
   3  -4  -3  853.58   62.99
  -3   4   3  806.28   46.18
   3   4  -3  843.61   45.12
  -3   4   3  896.88   61.79
   3   4  -3  888.28   59.20
  -3  -4   2 1630.79   83.60
   3  -4  -2 1625.73   89.54
  -3   4   2 1863.56   93.09
   3   4  -2 1716.10   85.99
  -3   4   2 1594.54   75.91
  -3  -4   1  152.63   24.49
   3  -4  -1  174.33   25.51
  -3   4   1  186.75   27.84
  -3  -4   0  191.18   27.70
  -3   4   0  166.95   25.51
  -3  -4  -1   63.07   22.29
  -3   4  -1   72.05   18.10
  -3  -4  -2  695.89   55.63
  -3   4  -2  703.44   48.01
  -3  -4  -3  194.00   31.73
  -3  -4  -3  181.15   22.87
  -3   4  -3  169.58   23.04
  -3   4  -3  187.64   24.21
  -3  -4  -4  412.49   45.28
  -3  -4  -4  432.35   37.45
  -3   4  -4  468.77   41.63
  -3   4  -4  420.26   35.66
  -3  -4  -5  691.27   60.51
  -3  -4  -5  670.99   51.34
  -3   4  -5  686.80   46.65
  -3   4  -5  724.30   55.79
  -3  -4  -6  368.90   44.62
  -3  -4  -6  265.30   33.70
  -3   4  -6  379.83   43.47
  -3   4  -6  252.51   26.69
  -3  -4  -7  202.59   35.29
  -3  -4  -7  174.03   28.96
  -3   4  -7  196.91   22.95
  -3   4  -7  186.53   33.12
  -3  -4  -8  479.85   54.71
  -3   4  -8  493.43   49.74
  -3  -4  -9  575.59   63.12
  -3   4  -9  642.75   60.34
  -3   4 -10 1242.80   89.77
  -3   4 -10 1203.97   87.88
  -3  -4 -11  414.89   30.76
  -3  -4 -11  465.53   60.20
  -3   4 -11  448.53   55.99
  -3   4 -11  457.56   30.24
  -3  -4 -11  436.09   32.21
  -3  -4 -11  503.97   40.19
  -3   4 -11  434.36   31.62
  -3  -4 -11  430.25   31.13
  -3   4 -11  493.86   56.42
  -3   4 -11  548.95   35.99
  -3   4 -11  466.95   33.22
  -3   4 -12  733.67   75.15
  -3   4 -12  625.77   37.35
  -3  -4 -12  603.25   39.42
  -3  -4 -12  682.93   41.96
  -3  -4 -12  481.06   43.48
  -3   4 -12  613.06   40.01
  -3  -4 -12  579.20   38.71
  -3   4 -12  722.76   71.80
  -3  -4 -12  613.59   71.50
  -3  -4 -12  650.12   38.41
  -3   4 -12  693.37   42.91
  -3   4 -12  648.01   41.00
  -3   4 -13    7.24    7.27
  -3  -4 -13    4.06    8.95
  -3   4 -13    1.86   18.29
  -3   4 -13    6.72   10.14
  -3  -4 -13    8.84    9.85
  -3  -4 -13    0.25    9.06
  -3  -4 -13   -5.82   24.53
  -3  -4 -13    1.58    5.72
  -3   4 -13    7.96   10.18
  -3   4 -13    2.85    9.96
  -3   4 -13   12.56   21.19
  -3   4 -14  149.03   16.99
  -3  -4 -14  163.77   20.18
  -3  -4 -14  162.94   20.84
  -3   4 -14  179.16   22.16
  -3   4 -14  143.58   20.30
  -3   4 -14  158.05   20.29
  -3  -4 -14  113.42   15.07
  -3  -4 -15  114.32   17.76
  -3   4 -15  113.87   15.05
  -3   4 -15  119.04   19.62
  -3  -4 -15  129.28   19.12
  -3   4 -15  112.87   18.09
  -3   4 -15  119.30   18.02
  -3   4 -16  227.00   19.98
  -3  -4 -16  242.79   24.26
  -3   4 -16  268.19   26.79
  -3  -4 -16  208.77   23.71
  -3   4 -16  219.84   22.76
  -3   4 -16  255.16   25.68
  -3   4 -17   -3.17    6.61
  -3  -4 -17   -6.84   11.83
  -3  -4 -17    2.51   10.23
  -3   4 -17   -1.14    5.99
  -3  -4 -18   -2.47    9.63
  -3   4 -18   12.77    6.79
  -3  -4 -18    8.33    9.27
  -3  -4 -19   -2.30    8.23
  -3   4 -19   -5.32    6.87
  -3  -4 -19    0.41    6.32
  -3  -4 -19   10.24    7.85
  -3   4 -20    0.06    5.22
  -3  -4 -20   14.55    6.73
  -3   4 -20    0.90    4.43
  -3  -4 -20   -1.99    4.45
  -3  -4 -20    0.68    5.17
   3   5 -20  178.86   14.31
   3   5 -20  183.06   14.75
   3   5 -19  239.39   23.71
   3  -5 -19  206.15   25.40
   3   5 -19  228.55   23.62
   3   5 -19  263.19   24.74
   3   5 -18  144.54   21.22
   3   5 -18  190.17   23.58
   3  -5 -18  135.37   28.46
   3   5 -17  225.59   23.41
   3  -5 -17  195.88   22.29
   3  -5 -17  179.32   22.05
   3   5 -17  223.17   24.88
   3   5 -17  227.01   23.16
   3  -5 -16  476.08   34.68
   3   5 -16  558.83   37.65
   3  -5 -16  523.70   33.33
   3   5 -16  595.49   39.62
   3  -5 -16  469.35   35.21
   3   5 -16  588.58   37.81
   3  -5 -16  503.36   32.88
   3  -5 -15   96.09   18.73
   3  -5 -15  110.16   17.68
   3  -5 -15   83.84   16.73
   3   5 -15   91.49   17.08
   3   5 -15  122.16   20.08
   3   5 -15   82.60   13.61
   3  -5 -15   80.98   15.46
   3  -5 -15   86.01   14.93
   3   5 -15  101.40   17.84
   3  -5 -14  451.51   34.90
   3  -5 -14  409.43   32.12
   3  -5 -14  377.38   29.85
   3   5 -14  419.62   31.31
   3   5 -14  397.31   33.10
   3   5 -14  310.40   26.99
   3  -5 -14  373.00   31.35
   3   5 -14  464.48   34.18
   3  -5 -14  391.09   30.05
   3  -5 -13  295.41   27.42
   3  -5 -13  236.61   24.29
   3  -5 -13  269.53   24.37
   3   5 -13  279.08   25.16
   3   5 -13  301.81   27.28
   3  -5 -13  266.11   25.81
   3   5 -13  205.22   21.47
   3   5 -13  219.26   42.19
   3   5 -13  286.41   26.72
   3  -5 -13  296.17   24.97
   3   5 -13  323.37   55.44
   3  -5 -12  364.75   30.39
   3  -5 -12  355.89   29.40
   3   5 -12  331.95   26.98
   3  -5 -12  367.17   27.97
   3   5 -12  405.07   30.95
   3  -5 -12  351.82   29.77
   3   5 -12  365.64   29.10
   3   5 -12  369.66   51.16
   3  -5 -12  326.18   26.88
   3   5 -12  359.32   55.44
   3  -5 -12  365.03   65.13
   3  -5 -11   11.71    8.26
   3  -5 -11   12.30    9.68
   3  -5 -11   13.02    7.98
   3   5 -11   13.06    8.49
   3  -5 -11    9.43    8.03
   3   5 -11   28.00   11.35
   3  -5 -11   15.28    8.69
   3   5 -11    9.64    7.96
   3  -5 -11   14.78   22.98
   3   5 -11    1.54   15.87
   3   5 -11    8.26   17.93
   3  -5 -10  208.30   20.71
   3  -5 -10  233.41   21.30
   3   5 -10  195.92   36.13
   3   5 -10  203.54   20.06
   3  -5 -10  189.45   46.07
   3   5 -10  222.82   39.61
   3  -5 -10  252.49   22.75
   3   5 -10  199.65   20.25
   3  -5 -10  202.38   20.02
   3  -5  -9  103.21   36.61
   3   5  -9   86.66   24.77
   3   5  -9  126.85   29.63
  -3   5   9  125.38   25.73
   3  -5  -8   72.86   30.56
   3   5  -8   90.17   23.98
   3  -5  -8   83.54   31.45
   3   5  -8   61.98   28.88
  -3   5   8   88.53   23.55
   3  -5  -7   53.53   26.72
   3   5  -7   72.01   19.32
   3   5  -7   83.30   29.53
  -3   5   7   53.17   19.22
   3  -5  -6  226.09   42.95
   3   5  -6  224.27   30.43
   3   5  -6  241.13   40.37
  -3   5   6  234.09   33.92
   3  -5  -5 1626.59  107.67
   3   5  -5 1671.00   89.46
   3   5  -5 1636.80  102.39
  -3   5   5 1657.45   80.35
  -3   5   5 1586.28   94.68
  -3  -5   4  390.90   33.23
   3  -5  -4  393.74   48.32
   3   5  -4  354.56   36.74
  -3   5   4  391.55   32.57
   3   5  -4  389.57   43.53
   3   5  -4  406.46   31.01
  -3   5   4  406.94   43.75
  -3  -5   3 1577.22   82.72
   3  -5  -3 1686.10   99.73
  -3   5   3 1557.36   78.33
   3   5  -3 1674.59   77.32
   3   5  -3 1563.58   90.69
  -3   5   3 1705.44   95.48
  -3  -5   2 1310.82   74.84
   3  -5  -2 1329.78   83.48
  -3   5   2 1362.29   82.48
  -3   5   2 1273.33   67.93
  -3  -5   1 1150.56   72.52
   3  -5  -1 1305.69   78.20
  -3   5   1 1216.93   65.88
  -3   5   1 1208.93   75.71
  -3  -5   0  414.54   42.11
  -3   5   0  400.69   39.46
  -3  -5  -1 1253.23   79.52
  -3   5  -1 1269.96   73.08
  -3  -5  -2 1500.91   89.83
  -3   5  -2 1420.86   77.60
  -3  -5  -3  481.10   49.55
  -3  -5  -3  422.96   38.76
  -3   5  -3  437.00   37.76
  -3   5  -3  480.49   43.03
  -3  -5  -4 1110.87   81.39
  -3  -5  -4 1249.02   74.70
  -3   5  -4 1245.94   78.16
  -3   5  -4 1266.51   70.01
  -3  -5  -5  694.45   61.31
  -3  -5  -5  575.88   51.32
  -3   5  -5  684.22   58.15
  -3   5  -5  670.37   47.08
  -3  -5  -6  537.20   55.72
  -3  -5  -6  379.66   42.88
  -3   5  -6  418.42   36.04
  -3   5  -6  618.18   56.50
  -3  -5  -7   -8.82   22.60
  -3  -5  -7    7.89   12.95
  -3   5  -7    8.77   16.12
  -3  -5  -8  194.06   37.32
  -3   5  -8  166.40   34.06
  -3   5  -9   86.72   25.73
  -3  -5  -9   61.07   23.76
  -3   5  -9   91.62   23.77
  -3  -5 -10  129.60   15.94
  -3  -5 -10  105.12   30.14
  -3   5 -10  118.96   28.43
  -3  -5 -10  134.32   16.37
  -3  -5 -10  147.17   26.05
  -3   5 -10  129.69   16.68
  -3  -5 -10  131.08   16.23
  -3   5 -10  168.43   32.86
  -3   5 -10  153.67   18.14
  -3   5 -10  149.37   18.00
  -3  -5 -11  268.33   23.93
  -3  -5 -11  157.64   35.59
  -3   5 -11  332.22   48.89
  -3  -5 -11  289.57   25.28
  -3  -5 -11  282.07   34.43
  -3   5 -11  260.46   24.15
  -3  -5 -11  248.10   23.46
  -3   5 -11  332.31   45.06
  -3  -5 -11  293.55   47.65
  -3   5 -11  260.60   25.61
  -3   5 -11  299.37   26.46
  -3  -5 -12    1.68    8.05
  -3   5 -12  -10.18   14.94
  -3   5 -12    8.14    9.79
  -3  -5 -12   10.82    8.28
  -3  -5 -12  -29.81   32.69
  -3  -5 -12    7.95    9.30
  -3   5 -12    8.83    9.46
  -3  -5 -12  -19.87   18.83
  -3   5 -12   21.00   10.92
  -3  -5 -13   13.19    8.94
  -3   5 -13  -10.00   21.43
  -3   5 -13   38.23   13.55
  -3  -5 -13   15.72   11.00
  -3  -5 -13   27.88   11.43
  -3  -5 -13   36.72   24.81
  -3   5 -13   13.18   10.07
  -3   5 -13   14.07   10.73
  -3  -5 -14  189.90   21.68
  -3   5 -14  190.16   23.16
  -3  -5 -14  178.48   21.70
  -3   5 -14  161.44   21.47
  -3   5 -14  184.20   22.12
  -3  -5 -15  129.82   18.43
  -3  -5 -15  122.68   18.82
  -3   5 -15  121.64   19.25
  -3   5 -15  129.70   18.84
  -3  -5 -16  364.74   29.35
  -3  -5 -16  350.07   30.23
  -3   5 -16  384.09   30.71
  -3   5 -16  375.35   29.36
  -3  -5 -17  272.39   23.81
  -3  -5 -17  308.72   26.19
  -3   5 -18  240.24   19.62
  -3  -5 -18  246.13   19.90
  -3  -5 -18  243.37   22.50
  -3  -5 -18  251.51   21.54
  -3   5 -19  279.94   18.60
  -3  -5 -19  279.32   18.78
  -3  -5 -19  284.61   21.43
  -3  -5 -19  234.42   18.82
  -3   5 -20  128.00   11.86
  -3  -5 -20  131.48   12.41
  -3  -5 -20  115.25   11.19
   3   6 -20    8.50    4.44
   3   6 -20    1.97    4.59
   3   6 -19   78.53   11.67
   3   6 -19  107.87   13.70
   3   6 -19   74.92   11.56
   3   6 -18    3.09   12.14
   3   6 -18    8.05   13.84
   3   6 -17   14.31   13.51
   3   6 -17   27.01   13.19
   3   6 -16   15.39   11.54
   3  -6 -16   20.61   12.80
   3   6 -16   24.86   13.98
   3   6 -16   24.28   12.84
   3  -6 -15  118.56   18.83
   3  -6 -15  130.11   19.52
   3   6 -15  163.97   22.67
   3  -6 -15   85.29   13.08
   3  -6 -15  114.65   15.89
   3  -6 -15  124.13   17.24
   3   6 -15  148.19   20.22
   3  -6 -14    8.02   10.75
   3  -6 -14    3.82   10.07
   3  -6 -14    2.31    9.79
   3   6 -14   12.53    9.67
   3  -6 -14    4.20    7.32
   3   6 -14   17.44   12.68
   3  -6 -14  -27.15    9.82
   3   6 -14   15.32    7.55
   3  -6 -14    7.27    8.35
   3   6 -14   -1.18   12.38
   3  -6 -13  289.13   27.51
   3  -6 -13  305.09   26.64
   3  -6 -13  288.06   24.26
   3  -6 -13  298.35   27.13
   3   6 -13  286.72   24.98
   3   6 -13  336.70   28.76
   3   6 -13  351.82   28.86
   3   6 -13  292.08   50.37
   3  -6 -13  266.22   23.98
   3   6 -13  391.84   59.97
   3  -6 -12    3.94    9.38
   3  -6 -12    3.42    8.49
   3  -6 -12    3.22    7.52
   3   6 -12   11.86    9.46
   3   6 -12   10.92    8.74
   3  -6 -12    7.47    8.66
   3  -6 -12    8.41    7.92
   3  -6 -12  -16.06   24.59
   3   6 -12   -0.34    8.95
   3   6 -12   34.34   22.21
   3   6 -12  -24.00   24.38
   3  -6 -11  372.35   28.32
   3  -6 -11  366.28   28.92
   3   6 -11  346.91   26.69
   3  -6 -11  313.03   25.08
   3   6 -11  304.59   26.64
   3  -6 -11  314.61   26.79
   3   6 -11  389.40   28.94
   3   6 -11  334.12   48.05
   3   6 -11  449.28   58.97
   3  -6 -11  352.33   26.57
   3  -6 -11  313.01   60.49
   3  -6 -10    7.41    7.83
   3  -6 -10   12.05    7.49
   3  -6 -10   17.85    8.69
   3   6 -10   15.42    8.36
   3   6 -10   26.23   17.09
   3  -6 -10   29.33   31.05
   3   6 -10   30.00   21.75
   3   6 -10    2.37    7.83
   3  -6 -10   21.97    9.14
   3   6 -10    8.85    8.61
   3  -6 -10   11.97    7.73
   3  -6  -9 1393.25  121.66
   3   6  -9 1470.85  100.92
   3  -6  -9 1294.55  116.37
  -3   6   9 1485.88   99.92
   3   6  -9 1357.94  117.34
   3  -6  -8   27.73   27.16
   3   6  -8   44.60   17.14
   3   6  -8   61.04   29.09
  -3   6   8   52.89   22.34
   3   6  -7 1102.01   72.67
   3  -6  -7  947.62   90.83
   3   6  -7 1051.93   91.19
  -3   6   7  950.76   75.07
   3   6  -6   23.00   15.70
   3  -6  -6   11.65   22.12
   3   6  -6    6.54   19.96
  -3   6   6   30.91   18.22
   3   6  -5 1781.48   94.56
   3  -6  -5 1772.85  116.91
  -3   6   5 1664.34   87.39
  -3   6   5 1574.99   99.96
   3   6  -5 1659.40  107.34
  -3  -6   4  182.98   23.98
   3  -6  -4  175.10   37.25
   3   6  -4  174.95   31.83
  -3   6   4  179.43   24.46
   3   6  -4  142.98   19.85
  -3   6   4  151.11   29.89
  -3  -6   3 1092.16   66.91
   3  -6  -3 1199.38   85.50
  -3   6   3 1059.55   63.87
   3   6  -3 1034.62   73.66
   3   6  -3 1059.00   61.93
  -3   6   3 1065.24   76.51
  -3  -6   2   27.14   15.68
   3  -6  -2   13.05   21.17
  -3   6   2   19.96   13.34
  -3   6   2   18.66   20.32
  -3  -6   1  429.03   44.17
  -3   6   1  434.52   38.46
  -3   6   1  422.24   45.19
  -3  -6   0  -10.98   19.00
  -3   6   0    6.38   16.15
  -3  -6  -1  141.81   29.30
  -3   6  -1  151.02   25.98
  -3  -6  -2  141.88   31.79
  -3   6  -2  148.40   24.91
  -3  -6  -3  435.23   51.02
  -3  -6  -3  455.67   43.53
  -3   6  -3  506.56   42.60
  -3  -6  -4   41.54   24.91
  -3  -6  -4   77.76   20.42
  -3   6  -4   52.93   15.64
  -3   6  -4  101.48   25.59
  -3  -6  -5   57.39   23.98
  -3  -6  -5   50.45   18.14
  -3   6  -5   48.71   14.43
  -3   6  -5   92.98   25.43
  -3  -6  -6  145.23   32.76
  -3  -6  -6  134.35   27.73
  -3   6  -6  153.05   21.97
  -3   6  -6  122.06   28.93
  -3  -6  -7 1944.86  123.01
  -3   6  -7 2082.44  101.72
  -3   6  -7 2179.27  129.67
  -3  -6  -8   32.97   22.59
  -3  -6  -8   23.73   18.66
  -3   6  -8  -11.73   10.86
  -3   6  -8    5.99   19.91
  -3  -6  -9  786.16   80.16
  -3   6  -9 1104.11   96.74
  -3  -6 -10   15.11   18.60
  -3  -6 -10    8.74    7.76
  -3   6 -10    0.18   16.62
  -3   6 -10   10.53    8.76
  -3  -6 -10   -0.26    7.23
  -3  -6 -10    3.59    8.05
  -3   6 -10    8.38    8.32
  -3   6 -10   -1.04    9.34
  -3  -6 -11  680.21   41.57
  -3   6 -11  800.42   78.90
  -3  -6 -11  739.06   43.83
  -3  -6 -11  622.55   48.33
  -3   6 -11  678.75   42.84
  -3  -6 -11  705.07   42.78
  -3  -6 -11  773.97   78.17
  -3   6 -11  720.18   44.23
  -3   6 -11  757.83   45.13
  -3  -6 -12    7.50    9.84
  -3   6 -12   32.68   20.38
  -3  -6 -12   -6.33    9.66
  -3  -6 -12    4.31    8.77
  -3  -6 -12   20.19   19.29
  -3   6 -12   -1.28    9.35
  -3   6 -12    0.31    9.70
  -3  -6 -13  856.09   49.44
  -3  -6 -13  910.98   52.30
  -3  -6 -13  858.36   50.33
  -3   6 -13  929.15   52.34
  -3   6 -13  875.06   51.18
  -3  -6 -14    6.83    9.60
  -3  -6 -14    3.59    9.70
  -3   6 -14    2.08   10.08
  -3   6 -14   -9.43   11.34
  -3  -6 -15  234.39   23.43
  -3  -6 -15  230.26   24.98
  -3   6 -15  227.07   24.15
  -3   6 -15  243.74   24.71
  -3   6 -16   -0.72    8.39
  -3  -6 -16    0.78    9.40
  -3  -6 -16   -1.35   12.24
  -3   6 -16    3.57    9.19
  -3  -6 -17  136.53   16.89
  -3  -6 -17  123.42   17.54
  -3   6 -17   84.25   13.28
  -3  -6 -18    2.25    6.98
  -3   6 -18   -2.48    6.13
  -3  -6 -18   -8.50    6.66
  -3  -6 -18   -3.56    8.52
  -3   6 -18    4.29    6.15
  -3  -6 -19   -2.00    6.90
  -3  -6 -19    3.69    4.59
  -3   6 -19    7.47    5.27
  -3  -6 -19    6.38    6.07
  -3  -6 -20    1.65    4.72
  -3   6 -20   -0.49    4.46
  -3  -6 -20    0.32    3.68
   3   7 -19   11.36    6.11
   3   7 -19   13.14    6.43
   3   7 -18  448.83   37.68
   3   7 -18  485.86   38.49
   3   7 -17   24.25   13.74
   3   7 -17   17.36   12.29
   3   7 -16  775.00   47.82
   3  -7 -16  893.19   38.61
   3   7 -16  803.93   47.52
   3   7 -15   79.42   17.14
   3   7 -15   90.05   17.59
   3  -7 -14  160.73   20.37
   3  -7 -14  156.41   20.79
   3   7 -14  205.37   23.14
   3  -7 -14  130.10   14.88
   3  -7 -14  101.72   15.18
   3   7 -14  173.88   21.47
   3  -7 -13  234.15   23.88
   3  -7 -13  232.31   24.02
   3   7 -13  224.85   20.78
   3  -7 -13  221.88   23.79
   3  -7 -13  163.57   17.91
   3   7 -13  265.06   25.67
   3   7 -13  246.17   24.90
   3  -7 -13  166.35   18.83
   3  -7 -12  334.34   28.49
   3  -7 -12  336.30   28.01
   3  -7 -12  231.75   21.65
   3  -7 -12  309.38   27.60
   3   7 -12  376.71   27.13
   3   7 -12  407.82   30.45
   3  -7 -12  204.64   18.80
   3   7 -12  404.73   30.52
   3   7 -12  316.49   50.45
   3  -7 -12  233.72   22.30
   3  -7 -12  377.69   68.64
   3   7 -12  368.02   57.77
   3  -7 -11   81.52   14.16
   3  -7 -11   92.58   14.84
   3  -7 -11   49.79   29.88
   3  -7 -11   90.59   13.75
   3   7 -11   97.78   15.45
   3   7 -11   96.88   29.43
   3   7 -11   65.11   27.19
   3  -7 -11   80.65   14.35
   3   7 -11   92.37   14.21
   3  -7 -11   85.16   13.13
   3   7 -11   90.86   15.13
   3  -7 -10  122.16   16.26
   3  -7 -10  121.56   16.25
   3   7 -10  160.37   34.90
   3   7 -10  131.61   16.64
   3  -7 -10  172.36   46.19
   3   7 -10  148.61   33.20
   3  -7 -10  171.49   18.57
   3  -7 -10  142.10   17.67
   3   7 -10  134.03   17.58
   3   7 -10  156.15   44.90
   3  -7  -9  134.53   16.19
   3  -7  -9  105.32   38.68
   3   7  -9  163.12   17.12
   3   7  -9  139.26   32.35
   3  -7  -9  121.85   39.19
   3  -7  -9  136.56   17.12
   3   7  -9  132.44   15.76
   3   7  -9  140.85   41.61
  -3   7   9  149.64   34.67
   3  -7  -8  -10.66   23.05
   3   7  -8   -8.06   14.45
   3   7  -8  -47.11   28.16
  -3   7   8  -13.12   18.52
   3  -7  -7  100.80   34.56
   3   7  -7  127.01   25.71
   3   7  -7  121.17   33.32
  -3   7   7   80.75   25.71
   3  -7  -6    0.82   22.26
   3   7  -6  -13.48   15.10
   3   7  -6   -5.50   21.19
  -3   7   6   10.28   10.75
  -3   7   6    1.72   15.94
   3  -7  -5  166.49   40.72
   3   7  -5  122.04   23.77
   3   7  -5  128.52   32.77
  -3   7   5  149.33   24.65
  -3   7   5  120.42   29.50
   3   7  -5  122.58   20.70
  -3  -7   4  147.59   22.64
   3  -7  -4  157.42   36.67
  -3   7   4  185.53   28.20
   3   7  -4  139.46   31.20
  -3   7   4  154.15   32.36
   3   7  -4  127.14   21.10
  -3  -7   3  511.50   46.73
   3  -7  -3  567.63   61.74
   3   7  -3  620.61   46.87
  -3   7   3  491.75   44.48
  -3   7   3  558.88   56.74
  -3  -7   2  417.66   43.44
   3  -7  -2  442.60   51.15
  -3   7   2  403.98   39.75
   3   7  -2  435.61   39.61
  -3   7   2  469.42   52.13
  -3  -7   1   -2.72   16.87
  -3   7   1    7.01   19.79
  -3   7   1    1.62   14.07
  -3  -7   0  978.77   73.19
  -3   7   0  876.28   66.44
  -3   7   0  871.35   61.48
  -3  -7  -1  -12.57   22.47
  -3   7  -1   -4.48   14.09
  -3  -7  -2 2694.80  143.53
  -3   7  -2 2644.09  127.35
  -3  -7  -3   31.36   24.48
  -3   7  -3   50.32   16.76
  -3  -7  -4 1191.40   89.84
  -3   7  -4 1403.27   90.55
  -3   7  -4 1318.88   75.23
  -3  -7  -5  278.54   43.80
  -3  -7  -5  237.04   36.48
  -3   7  -5  353.78   45.61
  -3   7  -5  244.59   29.68
  -3  -7  -6   39.77   22.84
  -3  -7  -6   59.85   21.58
  -3   7  -6   48.52   14.92
  -3   7  -6   65.86   27.38
  -3  -7  -7   78.79   29.31
  -3  -7  -7   74.30   26.11
  -3   7  -7   80.25   29.79
  -3  -7  -8  562.84   66.36
  -3  -7  -8  546.62   62.97
  -3   7  -8  581.68   69.61
  -3  -7  -9  102.71   29.84
  -3  -7  -9  119.69   34.69
  -3  -7  -9  103.51   14.02
  -3  -7  -9  111.33   15.13
  -3  -7  -9  151.32   26.35
  -3  -7  -9   92.67   14.34
  -3   7  -9  104.17   14.97
  -3  -7  -9  106.14   14.91
  -3   7  -9  101.36   35.86
  -3   7  -9  103.45   15.33
  -3   7 -10   16.30   20.02
  -3  -7 -10    0.78    7.16
  -3  -7 -10   -2.30   18.41
  -3  -7 -10   -1.92    8.51
  -3  -7 -10   20.63   24.67
  -3  -7 -10    3.86    7.18
  -3   7 -10   -6.56    9.79
  -3   7 -10   -5.80    9.61
  -3  -7 -11   -3.39   19.81
  -3  -7 -11    5.80    8.13
  -3   7 -11   17.55   19.28
  -3  -7 -11    7.09    8.44
  -3  -7 -11    9.98    8.25
  -3  -7 -11   16.15   17.49
  -3   7 -11   12.26    9.58
  -3   7 -11    6.25   10.08
  -3  -7 -12   62.07   13.45
  -3   7 -12   51.38   27.79
  -3  -7 -12   72.87   14.83
  -3  -7 -12   -4.84   35.78
  -3  -7 -12   65.84   14.79
  -3   7 -12   67.91   14.73
  -3   7 -12   66.85   14.13
  -3  -7 -12   96.37   32.96
  -3  -7 -13   -7.21    9.03
  -3  -7 -13   12.57   11.44
  -3  -7 -13    8.83   10.80
  -3   7 -13    2.59    9.35
  -3   7 -13    0.48   10.67
  -3  -7 -14   42.25   12.21
  -3  -7 -14   57.17   14.75
  -3   7 -14   51.02   13.42
  -3   7 -14   48.64   14.37
  -3   7 -15  115.08   17.74
  -3  -7 -15  130.56   17.83
  -3  -7 -15  143.97   20.01
  -3   7 -15  110.37   16.84
  -3   7 -15  161.34   20.30
  -3  -7 -16  422.61   29.34
  -3  -7 -16  416.21   31.44
  -3   7 -16  345.07   28.40
  -3  -7 -17   29.56    9.38
  -3  -7 -17   35.17   11.14
  -3   7 -17   38.28    8.65
  -3  -7 -17   22.82    7.72
  -3   7 -17   38.07    9.93
  -3  -7 -18  320.06   22.29
  -3  -7 -18  304.72   19.48
  -3   7 -18  341.73   20.44
  -3  -7 -18  326.06   24.31
  -3   7 -18  304.13   21.02
  -3  -7 -19    1.85    5.59
  -3   7 -19    7.30    5.96
  -3  -7 -19    8.05    5.28
   3   8 -19   16.99    5.99
   3   8 -19   14.39    5.70
   3   8 -18   36.90    9.40
   3  -8 -18   25.83   25.31
   3   8 -18   63.38   11.42
   3   8 -17   20.28   11.66
   3   8 -17   14.55   12.01
   3   8 -16    6.11   13.90
   3   8 -16  -16.98   14.01
   3   8 -15   37.45   15.53
   3   8 -15   44.56   15.90
   3   8 -14   72.00   16.27
   3   8 -14   79.16   16.44
   3   8 -13  432.66   32.11
   3  -8 -13  302.51   22.40
   3   8 -13  453.47   33.40
   3  -8 -13  316.27   25.44
   3  -8 -12   14.91    9.09
   3  -8 -12    4.31    7.73
   3   8 -12   23.26   10.59
   3  -8 -12    1.43    6.07
   3   8 -12   18.05   10.45
   3   8 -12   40.48   25.80
   3  -8 -12    0.81   28.84
   3   8 -12   54.54   29.38
   3  -8 -11  880.44   47.10
   3   8 -11  884.98   47.13
   3   8 -11  874.29   82.98
   3  -8 -11  791.48   97.62
   3  -8 -11  841.21   42.92
   3   8 -11  942.15   89.47
   3  -8 -11  816.64   47.15
   3   8 -11  817.75   46.27
   3  -8 -10  511.81   33.60
   3  -8 -10  496.90   33.81
   3  -8 -10  503.52   77.89
   3  -8 -10  422.60   71.88
   3   8 -10  603.35   66.73
   3   8 -10  575.73   35.18
   3  -8 -10  310.12   24.07
   3  -8 -10  534.37   35.16
   3   8 -10  524.89   34.60
   3   8 -10  438.99   72.07
   3  -8  -9  250.46   21.74
   3  -8  -9  217.53   53.72
   3  -8  -9  245.77   22.13
   3  -8  -9  263.13   56.43
   3   8  -9  236.73   21.12
   3   8  -9  261.03   43.23
   3  -8  -9  237.51   22.39
   3   8  -9  222.43   21.59
   3   8  -9  252.54   21.76
   3  -8  -9  136.15   14.48
   3   8  -9  239.51   53.38
  -3   8   9  244.88   42.97
   3  -8  -8  344.06   62.22
   3   8  -8  430.63   47.38
   3   8  -8  457.41   28.41
   3   8  -8  417.04   27.10
   3  -8  -8  249.43   19.85
  -3   8   8  433.49   55.42
   3   8  -8  388.05   62.04
   3   8  -7 1167.67   80.27
   3  -8  -7 1114.73  106.86
   3   8  -7 1117.95  100.96
  -3   8   7 1114.88   90.18
   3  -8  -6  284.00   53.47
   3   8  -6  295.68   37.44
  -3   8   6  269.56   43.01
   3   8  -6  263.44   47.00
  -3   8   6  264.41   35.59
   3  -8  -5  442.95   62.61
   3   8  -5  534.92   49.14
  -3   8   5  426.49   44.66
  -3   8   5  373.64   50.48
   3   8  -5  433.54   41.85
   3   8  -5  447.37   56.94
  -3  -8   4  970.50   63.15
   3  -8  -4  850.56   83.58
   3   8  -4  906.11   78.03
  -3   8   4  933.26   66.32
   3   8  -4  657.36   55.62
  -3   8   4  832.25   74.02
  -3  -8   3  260.96   34.81
   3  -8  -3  203.46   40.60
   3   8  -3  247.28   31.50
  -3   8   3  242.57   33.61
  -3   8   3  211.32   38.06
  -3  -8   2  621.76   55.77
   3  -8  -2  563.36   61.52
   3   8  -2  580.26   50.29
  -3   8   2  549.57   50.16
  -3   8   2  597.26   60.41
  -3  -8   1   87.68   25.98
  -3   8   1   56.28   19.47
  -3   8   1   37.44   23.63
  -3  -8   0    3.99   17.77
  -3   8   0    5.04   15.26
  -3   8   0   13.57   19.09
  -3  -8  -1  193.19   37.98
  -3   8  -1  178.49   30.60
  -3  -8  -2  194.08   39.18
  -3   8  -2  148.70   26.85
  -3  -8  -3  264.01   43.86
  -3   8  -3  255.91   33.21
  -3  -8  -4   89.93   31.87
  -3  -8  -4   90.93   24.42
  -3   8  -4   76.07   23.82
  -3   8  -4   87.69   19.81
  -3  -8  -5  861.81   77.96
  -3  -8  -5  634.24   64.30
  -3   8  -5  970.67   80.06
  -3   8  -5  685.44   54.49
  -3  -8  -6   43.55   24.18
  -3  -8  -6   66.32   25.26
  -3   8  -6   37.52   21.69
  -3  -8  -7  416.99   57.31
  -3   8  -7  555.40   66.37
  -3  -8  -8  381.29   55.42
  -3  -8  -8  471.13   63.57
  -3  -8  -8  549.99   34.46
  -3  -8  -8  495.33   35.71
  -3  -8  -8  541.46   33.70
  -3  -8  -8  550.22   34.63
  -3   8  -8  497.38   66.94
  -3   8  -8  551.97   34.42
  -3  -8  -9  938.92   48.96
  -3  -8  -9  883.49   88.84
  -3  -8  -9  965.25   50.83
  -3  -8  -9  888.20   52.98
  -3  -8  -9  888.10   49.04
  -3   8  -9  958.46   49.64
  -3   8  -9  955.22   97.49
  -3  -8  -9  958.71   51.16
  -3   8  -9  911.95   49.69
  -3  -8 -10  620.46   39.29
  -3  -8 -10  598.31   75.59
  -3  -8 -10  684.88   41.52
  -3  -8 -10  685.75   48.31
  -3  -8 -10  657.67   40.86
  -3  -8 -10  632.24   70.25
  -3   8 -10  590.21   80.85
  -3   8 -10  654.61   40.35
  -3   8 -10  679.46   41.85
  -3  -8 -11  381.97   65.52
  -3   8 -11  500.16   65.47
  -3  -8 -11  437.44   31.77
  -3  -8 -11  387.39   31.37
  -3  -8 -11  445.16   43.69
  -3  -8 -11  434.48   32.43
  -3   8 -11  419.10   31.08
  -3  -8 -11  380.71   56.96
  -3   8 -11  394.98   31.97
  -3  -8 -12  250.35   23.73
  -3  -8 -12  239.10   24.69
  -3  -8 -12  219.24   23.92
  -3   8 -12  262.37   25.74
  -3   8 -12  236.99   23.33
  -3  -8 -13  198.54   21.45
  -3  -8 -13  214.40   24.33
  -3  -8 -13  233.09   24.39
  -3   8 -13  222.94   22.64
  -3   8 -13  257.33   25.67
  -3  -8 -14  179.68   20.14
  -3  -8 -14  200.40   22.76
  -3   8 -14  180.05   20.96
  -3   8 -14  194.32   22.94
  -3   8 -14  198.43   22.01
  -3  -8 -15  148.31   17.36
  -3  -8 -15  135.66   19.06
  -3   8 -15  118.92   18.07
  -3   8 -15  137.12   18.66
  -3  -8 -16   75.79   12.86
  -3  -8 -16   68.64   14.59
  -3   8 -16   50.71   11.73
  -3  -8 -17   55.66   10.46
  -3  -8 -17   44.02   11.26
  -3   8 -17   49.68   10.22
  -3  -8 -18    4.70    5.82
  -3  -8 -18    3.10    7.21
  -3   8 -18   -2.56    4.93
  -3  -8 -19   17.17    6.29
  -3   8 -19   23.67    6.05
  -3  -8 -19   21.77    5.62
   3   9 -18   72.91   11.07
   3  -9 -18  164.77   25.30
   3   9 -17  282.59   22.87
   3   9 -17  251.97   20.95
   3   9 -17  278.16   22.77
   3   9 -16   92.95   19.69
   3   9 -16  104.44   21.18
   3   9 -15  701.41   50.48
   3   9 -15  793.56   53.75
   3   9 -14  121.82   20.03
   3   9 -14  120.36   21.06
   3   9 -13  245.10   24.93
   3   9 -13  274.12   27.87
   3   9 -12   44.36   12.92
   3   9 -12   32.31   12.51
   3  -9 -11   24.06    9.67
   3   9 -11   29.31   10.91
   3   9 -11   31.84   18.48
   3  -9 -11   42.94   36.32
   3   9 -11   15.95   22.46
   3   9 -11   40.37   11.79
   3  -9 -11   76.81   12.07
   3  -9 -10  281.29   23.63
   3  -9 -10  309.17   64.70
   3   9 -10  260.29   23.56
   3  -9 -10  300.74   62.27
   3   9 -10  318.79   50.08
   3   9 -10  302.92   25.34
   3  -9 -10  156.76   16.00
   3   9 -10  243.01   59.24
   3  -9  -9   21.45    8.37
   3  -9  -9   21.46    9.05
   3  -9  -9   -1.39   30.38
   3   9  -9   10.58    8.07
   3   9  -9   13.50    9.25
   3  -9  -9    2.31    6.98
   3   9  -9   23.09    8.67
   3   9  -9   17.10    9.11
   3   9  -9   -1.74   29.50
  -3   9   9   -0.60   18.66
   3  -9  -8    7.08   29.21
   3   9  -8  -10.16   13.05
   3  -9  -8    9.73    7.19
   3   9  -8    2.54    6.67
   3  -9  -8   -4.21    7.25
   3   9  -8    7.74    7.18
   3   9  -8    3.49    8.93
   3   9  -8   -0.26   23.48
  -3   9   8   29.07   24.18
   3   9  -7   -2.70   12.84
   3  -9  -7   -4.16   28.19
   3  -9  -7   -2.51    6.78
   3   9  -7    8.55    7.27
   3   9  -7  -23.85   24.84
   3  -9  -7    0.02    7.46
  -3   9   7   18.52   19.01
   3  -9  -6   -3.96   24.38
   3   9  -6  -10.44   12.99
   3   9  -6   10.27   22.02
  -3   9   6   14.19   21.19
   3   9  -5  602.61   54.67
   3  -9  -5  578.47   73.47
   3   9  -5  594.00   52.27
  -3   9   5  547.20   53.93
  -3   9   5  472.62   59.53
   3   9  -5  527.76   65.82
   3  -9  -4  -11.02   23.98
   3   9  -4  -12.37   20.55
  -3   9   4    9.64   14.65
   3   9  -4  -45.59   16.53
  -3   9   4   -2.80   18.74
  -3  -9   3  988.07   72.14
   3  -9  -3  853.88   83.25
   3   9  -3  838.36   65.50
  -3   9   3  983.88   72.52
  -3   9   3  971.83   83.61
  -3  -9   2   -6.80   16.72
   3  -9  -2   -2.33   22.13
   3   9  -2    7.96   13.86
  -3   9   2   19.89   20.52
  -3   9   2  -10.70   17.22
  -3  -9   1 1417.11   97.08
  -3   9   1 1407.56   98.63
  -3   9   1 1413.65   90.50
   3   9  -1 1419.06   90.26
  -3  -9   0  147.88   33.56
  -3   9   0   76.32   24.63
  -3   9   0  132.84   28.85
  -3  -9  -1 1443.17  103.46
  -3   9  -1 1330.93   89.64
  -3  -9  -2  185.75   37.78
  -3   9  -2  180.64   30.12
  -3  -9  -3 1868.14  123.56
  -3   9  -3 1685.47   98.93
  -3  -9  -4   30.62   25.77
  -3  -9  -4   33.04   19.12
  -3   9  -4   26.69   13.55
  -3  -9  -5 1159.49   96.98
  -3  -9  -5  966.10   86.58
  -3   9  -5 1258.69   99.16
  -3   9  -5 1317.62   80.06
  -3  -9  -6  303.73   50.23
  -3  -9  -6  190.83   39.70
  -3   9  -6  240.77   44.51
  -3  -9  -7  366.25   56.12
  -3  -9  -7  465.10   30.76
  -3  -9  -7  452.15   30.82
  -3   9  -7  502.21   66.28
  -3  -9  -8  -39.23   22.77
  -3  -9  -8   20.35   25.00
  -3  -9  -8  -10.94   17.70
  -3  -9  -8    5.11    7.84
  -3  -9  -8    5.82    6.34
  -3   9  -8    3.34   22.78
  -3  -9  -8    0.05    7.21
  -3   9  -8   -0.97    7.13
  -3  -9  -9   81.54   12.97
  -3  -9  -9   33.14   28.58
  -3  -9  -9   70.89   13.56
  -3  -9  -9   76.11   13.34
  -3   9  -9   58.87   12.54
  -3   9  -9   68.84   34.80
  -3  -9  -9   81.58   13.87
  -3   9  -9   59.32   11.96
  -3  -9 -10  -14.66   28.18
  -3  -9 -10    2.38    6.08
  -3  -9 -10    1.78    7.77
  -3  -9 -10    2.43    7.75
  -3   9 -10    0.96    6.69
  -3   9 -10   -4.54   27.69
  -3  -9 -10   -4.02   18.72
  -3   9 -10    9.57    9.02
  -3   9 -11   55.18   28.50
  -3  -9 -11   32.82   29.87
  -3  -9 -11   21.75    9.41
  -3  -9 -11   27.20   11.16
  -3  -9 -11    7.14   36.08
  -3  -9 -11   43.53   12.79
  -3  -9 -11   65.14   30.03
  -3   9 -11   31.42   10.19
  -3   9 -11   28.24   11.47
  -3  -9 -12    2.51    6.93
  -3  -9 -12    2.59   10.52
  -3  -9 -12    6.05   10.34
  -3   9 -12    6.74    9.90
  -3   9 -12    2.69    7.62
  -3   9 -13   60.76   15.69
  -3  -9 -13   46.15   11.41
  -3  -9 -13   78.01   16.09
  -3  -9 -13   67.92   14.53
  -3   9 -13   67.85   13.39
  -3   9 -13   62.55   13.93
  -3  -9 -14    6.41    8.63
  -3  -9 -14    9.57   11.04
  -3   9 -14    1.30   11.13
  -3   9 -14    3.79   10.39
  -3  -9 -15  269.90   22.47
  -3  -9 -15  289.36   26.26
  -3   9 -15  313.96   27.73
  -3  -9 -16   -5.48    6.95
  -3  -9 -16   -2.45    9.04
  -3   9 -16    1.81    8.80
  -3  -9 -17  323.95   21.35
  -3  -9 -17  323.94   24.66
  -3   9 -17  298.44   22.46
  -3  -9 -18   33.85    6.51
  -3  -9 -18   45.47    9.37
  -3   9 -18   34.23    7.52
  -3   9 -18   38.02    7.45
  -3  -9 -19  420.86   22.85
   3  10 -18   52.98    8.15
   3 -10 -18  158.40   22.04
   3  10 -17    3.24    6.42
   3  10 -17    3.58    7.45
   3  10 -16   22.19   10.66
   3  10 -16   23.83    9.16
   3  10 -15   19.94   15.81
   3  10 -15   17.73   13.14
   3  10 -14  255.31   30.92
   3  10 -14  214.60   27.38
   3  10 -13    1.20   12.29
   3  10 -13   -0.35   10.06
   3  10 -12  496.54   38.29
   3  10 -12  468.50   35.90
   3  10 -11   10.02   10.15
   3  10 -11   18.12   10.22
   3 -10 -10 1006.33  114.87
   3  10 -10  997.70   49.17
   3 -10 -10  868.86  107.91
   3  10 -10  948.32   87.61
   3 -10 -10  689.83   35.95
   3  10 -10  699.20   44.61
   3  10 -10  867.48  107.70
   3 -10  -9    3.56    5.91
   3 -10  -9    5.28   27.92
   3  10  -9    7.91    8.20
   3  10  -9    0.56    6.98
   3  10  -9    4.31    7.46
   3  10  -9   -0.92   23.78
  -3  10   9   28.94   22.83
   3 -10  -8 1000.15   48.17
   3 -10  -8 1024.72  112.56
   3  10  -8  927.64   45.93
   3  10  -8  935.51   50.29
  -3  10   8  890.21   86.71
   3  10  -8 1005.46  105.06
   3 -10  -7  187.92   19.12
   3 -10  -7  178.42   49.15
   3  10  -7  232.89   36.28
   3 -10  -7  140.70   13.19
   3  10  -7  181.62   17.96
   3  10  -7  177.98   21.62
   3  10  -7  199.86   46.79
  -3  10   7  222.66   44.22
   3  10  -6  794.09   64.66
   3 -10  -6  718.91   87.14
   3  10  -6  666.25   36.99
   3  10  -6  604.03   33.95
   3  10  -6  672.42   40.97
   3  10  -6  687.49   80.76
  -3  10   6  648.23   71.29
   3 -10  -6  673.85   37.71
   3 -10  -5    0.37   24.72
   3  10  -5   11.26   13.41
   3  10  -5   -0.11   24.11
  -3  10   5   11.83   18.00
  -3  10   5  -52.82   26.77
   3  10  -5   -1.12   11.06
   3 -10  -4  923.68   91.85
   3  10  -4  935.37   87.76
  -3  10   4  904.86   73.98
  -3  10   4  876.30   83.21
   3  10  -4  678.03   62.52
  -3 -10   3   13.25   14.07
   3 -10  -3    5.65   20.37
   3  10  -3   23.31   16.69
  -3  10   3   20.06   23.06
  -3  10   3   22.71   16.50
  -3 -10   2  524.04   55.37
   3 -10  -2  361.74   55.51
   3  10  -2  336.57   43.94
  -3  10   2  392.50   47.77
  -3  10   2  429.82   57.03
  -3 -10   1  259.70   41.73
   3  10  -1  205.33   34.77
  -3  10   1  203.73   34.76
  -3  10   1  199.35   40.06
  -3 -10   0   47.76   22.58
  -3  10   0   38.64   19.78
  -3  10   0   29.93   20.13
  -3 -10  -1   23.83   22.43
  -3  10  -1   16.04   18.45
  -3 -10  -2   15.96   21.95
  -3  10  -2    1.93   14.64
  -3 -10  -3  260.40   47.72
  -3  10  -3  177.73   30.95
  -3 -10  -4  400.62   58.20
  -3 -10  -4  280.14   45.43
  -3  10  -4  283.68   36.91
  -3 -10  -5  151.22   38.17
  -3 -10  -5  157.88   37.09
  -3  10  -5  193.11   29.99
  -3  10  -5  102.09   30.36
  -3 -10  -6  557.37   69.39
  -3 -10  -6  400.05   59.01
  -3  10  -6  638.70   73.70
  -3 -10  -6  571.19   35.39
  -3 -10  -7   -7.88   21.18
  -3 -10  -7   -8.01   21.08
  -3 -10  -7   -8.77   15.89
  -3 -10  -7   -2.40    6.70
  -3  10  -7    0.61   21.80
  -3 -10  -7    6.85    8.10
  -3  10  -7   -0.25    7.10
  -3 -10  -8  540.48   71.03
  -3 -10  -8  555.04   72.77
  -3 -10  -8  582.57   37.61
  -3 -10  -8  483.99   37.93
  -3 -10  -8  629.66   37.77
  -3 -10  -8  599.31   38.16
  -3  10  -8  582.85   35.84
  -3  10  -8  628.27   81.49
  -3 -10  -9   15.25   21.12
  -3 -10  -9  -17.71   24.62
  -3 -10  -9   15.23    9.23
  -3 -10  -9   20.15    9.16
  -3 -10  -9   19.18    9.20
  -3  10  -9   34.22   10.58
  -3  10  -9    9.06   21.62
  -3 -10 -10  946.62   99.68
  -3 -10 -10  734.72   45.29
  -3 -10 -10  960.88   52.65
  -3 -10 -10  995.16   52.14
  -3 -10 -10  895.27   57.20
  -3  10 -10  957.69  107.76
  -3  10 -10  938.58   47.86
  -3  10 -10  890.79   49.21
  -3  10 -10  936.45   54.32
  -3  10 -11   10.73   11.97
  -3 -10 -11    9.17    6.93
  -3 -10 -11   21.99   11.42
  -3 -10 -11   17.99   10.02
  -3  10 -11   13.67    8.03
  -3  10 -11   22.11   10.92
  -3 -10 -12  232.02   21.92
  -3 -10 -12  303.54   27.40
  -3 -10 -12  322.82   28.41
  -3  10 -12  291.12   23.78
  -3  10 -12  281.03   26.13
  -3  10 -12  279.47   28.41
  -3 -10 -13   25.94    8.92
  -3 -10 -13   46.48   13.28
  -3 -10 -13   44.70   12.22
  -3  10 -13   41.19   10.29
  -3  10 -13   31.63   13.28
  -3  10 -13   32.83   11.85
  -3 -10 -14  336.06   27.85
  -3  10 -14  276.25   26.76
  -3  10 -14  307.39   25.78
  -3 -10 -15   -2.01    5.42
  -3 -10 -15    4.47    9.92
  -3  10 -15   -6.97    9.74
  -3 -10 -16  171.27   15.44
  -3 -10 -16  194.90   19.53
  -3  10 -16  163.40   18.13
  -3 -10 -17   -3.03    4.36
  -3 -10 -17   -9.95    8.23
  -3  10 -17    0.14    5.58
  -3  10 -17    3.80    6.12
  -3 -10 -18   -2.78    5.47
  -3  10 -18    5.16    4.70
   3 -11 -18  766.87   36.83
   3  11 -17  243.00   18.56
   3  11 -17  252.76   19.04
   3  11 -16  349.37   25.59
   3  11 -15  350.41   26.95
   3  11 -15  290.40   21.33
   3  11 -14  518.69   43.14
   3  11 -14  380.93   37.57
   3  11 -13  570.28   45.91
   3  11 -13  466.91   40.92
   3  11 -12   54.43   22.59
   3 -11 -12 1674.60   40.84
   3  11 -11   71.47   16.41
   3  11 -11   54.50   14.57
   3 -11 -10   60.57   12.75
   3  11 -10   75.38   15.15
   3  11 -10   75.47   15.01
   3  11 -10   60.22   14.15
   3 -11  -9   59.45   12.69
   3 -11  -9   91.79   43.94
   3  11  -9   97.85   15.45
   3  11  -9   97.56   15.54
   3  11  -9   94.22   16.62
   3  11  -9   60.38   36.90
  -3  11   9  122.14   37.54
   3 -11  -8   22.70   31.08
   3 -11  -8    8.63    8.68
   3  11  -8   21.74    9.00
   3  11  -8   15.98   10.54
  -3  11   8    9.80   22.59
   3 -11  -7   24.27   34.04
   3 -11  -7   32.88   10.65
   3  11  -7   44.12   10.52
   3  11  -7   41.58   13.23
   3  11  -7   38.01   34.04
  -3  11   7   51.34   32.12
   3 -11  -6    8.48    7.25
   3 -11  -6    3.61   26.08
   3  11  -6   13.65   15.50
   3  11  -6   18.23    8.81
   3  11  -6   14.48    8.13
   3  11  -6    7.53   23.13
  -3  11   6   11.41   18.90
   3  11  -6   10.18   10.82
   3 -11  -5  292.42   59.54
   3  11  -5  370.46   46.26
   3 -11  -5  354.50   26.70
   3  11  -5  352.43   27.34
   3 -11  -5  273.34   17.13
   3  11  -5  321.00   24.57
   3  11  -5  366.65   30.46
  -3  11   5  376.26   57.68
  -3  11   5  327.27   46.85
   3  11  -5  351.16   59.05
   3  11  -5  244.65   38.07
   3 -11  -4  569.41   36.06
   3 -11  -4  483.85   32.33
   3 -11  -4  545.15   73.42
   3  11  -4  467.27   32.26
   3  11  -4  508.86   31.70
   3  11  -4  572.95   38.06
   3  11  -4  464.91   66.26
  -3  11   4  466.40   55.65
  -3  11   4  453.51   63.80
   3  11  -4  335.45   45.59
  -3 -11   3  514.44   55.85
   3 -11  -3  373.69   60.39
  -3  11   3  471.92   55.14
  -3  11   3  490.38   64.09
   3  11  -3  400.49   49.68
  -3 -11   2  393.45   50.04
   3 -11  -2  410.00   60.56
   3  11  -2  302.73   43.54
  -3  11   2  348.01   47.13
  -3  11   2  326.38   52.90
  -3 -11   1  981.88   84.59
  -3  11   1  885.82   76.61
   3  11  -1  859.62   75.52
  -3  11   1  896.64   83.08
  -3 -11   0  597.25   67.54
   3  11   0  564.52   60.32
  -3  11   0  540.71   61.88
  -3  11   0  500.08   57.17
  -3 -11  -1  662.45   73.83
  -3  11  -1  556.01   60.55
  -3 -11  -2  879.83   85.04
  -3  11  -2  579.17   59.13
  -3 -11  -3  605.50   73.10
  -3 -11  -3  492.70   63.99
  -3  11  -3  509.22   53.17
  -3 -11  -4  559.77   70.39
  -3  11  -4  559.72   35.44
  -3 -11  -4  536.98   68.39
  -3 -11  -4  487.00   32.08
  -3 -11  -5  496.60   32.88
  -3 -11  -5  603.41   73.64
  -3  11  -5  604.35   37.29
  -3 -11  -5  571.29   34.25
  -3  11  -5  555.53   72.15
  -3 -11  -5  518.96   34.00
  -3  11  -5  520.25   34.66
  -3 -11  -6   88.86   32.22
  -3 -11  -6  156.90   17.90
  -3  11  -6  188.37   20.22
  -3 -11  -6  151.20   39.78
  -3 -11  -6  160.92   17.78
  -3 -11  -6  179.93   19.29
  -3  11  -6  153.37   41.62
  -3  11  -6  192.65   21.35
  -3 -11  -7   32.67   25.94
  -3 -11  -7   -1.82   18.16
  -3  11  -7    7.98    8.21
  -3 -11  -7  -32.54   16.89
  -3 -11  -7   12.22    8.35
  -3 -11  -7    8.07    8.47
  -3  11  -7    4.46    9.14
  -3  11  -7    6.07   25.20
  -3  11  -7   13.78    7.69
  -3 -11  -8   41.08   29.27
  -3 -11  -8   56.90   12.89
  -3 -11  -8   40.57   20.90
  -3 -11  -8   40.22   10.62
  -3 -11  -8   49.22   12.01
  -3  11  -8   39.86    9.69
  -3  11  -8   45.26   14.02
  -3 -11  -9    0.79   25.34
  -3  11  -9   -2.83    6.13
  -3 -11  -9  -62.14   26.72
  -3 -11  -9    8.67   10.08
  -3 -11  -9    7.92    8.24
  -3  11  -9  -13.65   35.55
  -3 -11  -9   -1.78    7.90
  -3  11  -9    8.00    8.00
  -3  11  -9    5.85   11.83
  -3  11 -10   -3.37    6.25
  -3 -11 -10  -24.96   32.37
  -3 -11 -10    7.23    9.65
  -3 -11 -10   -2.84    8.85
  -3  11 -10   -4.14   11.39
  -3  11 -10    5.61    8.04
  -3 -11 -11   28.90   11.86
  -3 -11 -11   29.70    9.95
  -3  11 -11   23.88   13.43
  -3  11 -11   27.01    9.75
  -3 -11 -12   -2.54    8.63
  -3 -11 -12    3.28    9.78
  -3  11 -12    8.80    8.90
  -3  11 -12    0.22   12.40
  -3 -11 -13  170.00   16.52
  -3 -11 -13  191.08   21.89
  -3  11 -13  202.75   24.47
  -3  11 -13  184.55   19.93
  -3 -11 -14   27.38    7.68
  -3 -11 -14   19.81   11.06
  -3  11 -14   32.76   13.53
  -3 -11 -15  300.31   20.78
  -3 -11 -15  370.34   27.50
  -3  11 -15  357.14   28.26
  -3 -11 -16   94.06   13.73
  -3  11 -16   88.50   13.54
  -3  11 -17  266.39   16.96
  -3 -11 -17  311.08   21.09
  -3  11 -17  258.80   18.82
  -3 -11 -18  127.24   11.50
   3  12 -17    1.86    4.58
   3  12 -17    2.49    5.14
   3  12 -16    6.29    7.00
   3 -12 -16  -88.95   27.21
   3  12 -15   32.95   10.96
   3  12 -14   36.81   12.15
   3  12 -13  243.81   24.18
   3  12 -12   14.75   11.31
   3  12 -11  910.56   58.18
   3  12 -11  655.25   53.75
   3 -12 -10   27.14   10.32
   3  12 -10   23.76   11.73
   3  12 -10   25.32   11.49
   3  12 -10   12.26    9.57
   3 -12  -9  740.55   47.59
   3  12  -9  778.81   48.66
   3  12  -9  787.79   48.14
   3  12  -9  757.97   50.79
   3 -12  -8   94.91   16.72
   3 -12  -8  116.44   47.04
   3  12  -8   99.42   16.52
   3  12  -8   35.49   34.19
  -3  12   8  115.77   38.56
   3  12  -8  115.88   20.47
   3 -12  -7  427.79   75.44
   3 -12  -7  475.40   34.66
   3  12  -7  448.99   33.47
   3  12  -7  502.44   39.97
   3  12  -7  352.80   67.96
  -3  12   7  425.24   66.51
   3 -12  -6   87.03   38.28
   3 -12  -6   90.97   15.38
   3  12  -6   91.02   16.14
   3  12  -6   77.04   14.28
   3  12  -6   56.83   16.15
   3  12  -6   57.01   34.65
  -3  12   6  117.77   36.75
   3 -12  -5  413.15   70.15
   3  12  -5  385.68   48.85
   3 -12  -5  366.80   29.24
   3  12  -5  362.65   29.62
   3  12  -5  400.38   29.02
   3  12  -5  416.70   34.67
  -3  12   5  369.23   53.11
   3  12  -5  360.46   64.76
   3  12  -5  428.01   51.75
  -3  12   5  311.66   55.72
   3 -12  -4  100.00   37.02
   3 -12  -4  108.44   15.79
   3  12  -4  124.53   17.25
   3  12  -4  111.37   15.19
   3  12  -4  104.49   38.57
  -3  12   4  109.18   35.17
  -3  12   4  124.97   33.25
   3  12  -4   80.09   24.98
   3 -12  -3  277.48   55.55
   3 -12  -3  380.84   29.26
   3 -12  -3  360.63   27.63
   3  12  -3  380.24   28.61
   3  12  -3  376.98   27.86
   3  12  -3  228.75   39.74
  -3  12   3  323.02   56.36
  -3  12   3  341.91   50.53
   3 -12  -2   54.18   12.35
   3 -12  -2   58.47   12.44
   3 -12  -2   33.97   26.20
   3  12  -2   38.62   10.71
  -3 -12   2   61.08   23.56
   3  12  -2   49.06   11.52
   3  12  -2   34.08   18.51
  -3  12   2   24.57   20.88
  -3  12   2   40.47   25.13
   3  12  -1  387.00   28.54
  -3 -12   1  393.18   55.12
   3 -12  -1  424.23   29.97
   3 -12  -1  365.90   59.91
  -3  12   1  373.20   52.30
   3  12  -1  412.94   54.33
  -3  12   1  418.60   58.49
   3  12   0   68.76   13.03
  -3 -12   0   47.30   23.78
  -3  12   0   58.34   12.50
   3 -12   0   54.41   11.44
   3  12   0   71.30   25.80
  -3  12   0   60.59   24.36
   3  12   1   -0.71    7.50
  -3 -12  -1   17.15   20.60
  -3  12  -1   11.07    8.82
   3 -12   1   14.74    8.26
   3  12   1   12.66   20.38
  -3  12  -1   18.08   18.41
  -3 -12  -2   64.66   29.82
  -3  12  -2   64.15   12.78
   3 -12   2   68.32   13.85
  -3  12  -2   71.33   25.99
  -3 -12  -3  560.71   71.30
[truncated: 639,551 more chars]
