# Supplementary material
Source: MDPI journal article supplement (https://www.mdpi.com/2304-6740/12/3/73)
Supplement: s1 [file s1 › rac-[Ir(fpq)2(en)](PF6)/1a.cif]

data_a23061302a0229
_audit_creation_date               2023-08-24
_audit_creation_method
;
Olex2 1.5
(compiled 2023.03.06 svn.rbb2c1857 for OlexSys, GUI svn.r6748)
;
_shelx_SHELXL_version_number       '2018/3'
_audit_contact_author_address      ?
_audit_contact_author_email        ?
_audit_contact_author_name         ''
_audit_contact_author_phone        ?
_publ_contact_author_id_orcid      ?
_publ_section_references
;
Bourhis, L.J., Dolomanov, O.V., Gildea, R.J., Howard, J.A.K., Puschmann, H.
 (2015). Acta Cryst. A71, 59-75.

Dolomanov, O.V., Bourhis, L.J., Gildea, R.J, Howard, J.A.K. & Puschmann, H.
 (2009), J. Appl. Cryst. 42, 339-341.

Sheldrick, G.M. (2015). Acta Cryst. C71, 3-8.
;
_chemical_name_common              ?
_chemical_name_systematic          F-yea
_chemical_formula_moiety           'C32 H26 F2 Ir N4, 2(F3 P0.5)'
_chemical_formula_sum              'C32 H26 F8 Ir N4 P'
_chemical_formula_weight           841.74
_chemical_melting_point            ?
_chemical_oxdiff_formula           CHNFIr
_chemical_oxdiff_usercomment       '8 F-yea-j'
loop_
  _atom_type_symbol
  _atom_type_description
  _atom_type_scat_dispersion_real
  _atom_type_scat_dispersion_imag
  _atom_type_scat_source
 'C' 'C' 0.0181 0.0091 'International Tables Vol C Tables 4.2.6.8 and 6.1.1.4'
 'H' 'H' 0.0000 0.0000 'International Tables Vol C Tables 4.2.6.8 and 6.1.1.4'
 'F' 'F' 0.0727 0.0534 'International Tables Vol C Tables 4.2.6.8 and 6.1.1.4'
 'Ir' 'Ir' -4.7710 6.5667
 'International Tables Vol C Tables 4.2.6.8 and 6.1.1.4'
 'N' 'N' 0.0311 0.0180 'International Tables Vol C Tables 4.2.6.8 and 6.1.1.4'
 'P' 'P' 0.2955 0.4335 'International Tables Vol C Tables 4.2.6.8 and 6.1.1.4'

_shelx_space_group_comment
;
The symmetry employed for this shelxl refinement is uniquely defined
by the following loop, which should always be used as a source of
symmetry information in preference to the above space-group names.
They are only intended as comments.
;
_space_group_crystal_system        'triclinic'
_space_group_IT_number             2
_space_group_name_H-M_alt          'P -1'
_space_group_name_Hall             '-P 1'
loop_
  _space_group_symop_operation_xyz
 'x, y, z'
 '-x, -y, -z'

_cell_length_a                     8.3615(3)
_cell_length_b                     10.6980(5)
_cell_length_c                     19.2560(7)
_cell_angle_alpha                  76.136(4)
_cell_angle_beta                   84.487(3)
_cell_angle_gamma                  77.048(3)
_cell_volume                       1628.11(12)
_cell_formula_units_Z              2
_cell_measurement_reflns_used      7136
_cell_measurement_temperature      149.98(10)
_cell_measurement_theta_max        72.9210
_cell_measurement_theta_min        4.3140
_shelx_estimated_absorpt_T_max     ?
_shelx_estimated_absorpt_T_min     ?
_exptl_absorpt_coefficient_mu      9.072
_exptl_absorpt_correction_T_max    1.00000
_exptl_absorpt_correction_T_min    0.53379
_exptl_absorpt_correction_type     multi-scan
_exptl_absorpt_process_details
;
CrysAlisPro 1.171.40.84a (Rigaku Oxford Diffraction, 2020)
Empirical absorption correction using spherical harmonics,
implemented in SCALE3 ABSPACK scaling algorithm.
;
_exptl_absorpt_special_details     ?
_exptl_crystal_colour              yellow
_exptl_crystal_colour_primary      yellow
_exptl_crystal_density_diffrn      1.717
_exptl_crystal_density_meas        ?
_exptl_crystal_density_method      ?
_exptl_crystal_description         plate
_exptl_crystal_F_000               820
_exptl_crystal_preparation         ?
_exptl_crystal_size_max            0.15
_exptl_crystal_size_mid            0.12
_exptl_crystal_size_min            0.1
_exptl_transmission_factor_max     ?
_exptl_transmission_factor_min     ?
_diffrn_reflns_av_R_equivalents    0.0540
_diffrn_reflns_av_unetI/netI       0.0654
_diffrn_reflns_Laue_measured_fraction_full  0.998
_diffrn_reflns_Laue_measured_fraction_max  0.969
_diffrn_reflns_limit_h_max         10
_diffrn_reflns_limit_h_min         -9
_diffrn_reflns_limit_k_max         13
_diffrn_reflns_limit_k_min         -12
_diffrn_reflns_limit_l_max         23
_diffrn_reflns_limit_l_min         -16
_diffrn_reflns_number              11552
_diffrn_reflns_point_group_measured_fraction_full  0.998
_diffrn_reflns_point_group_measured_fraction_max  0.969
_diffrn_reflns_theta_full          67.684
_diffrn_reflns_theta_max           72.953
_diffrn_reflns_theta_min           4.352
_diffrn_ambient_environment        N~2~
_diffrn_ambient_temperature        149.98(10)
_diffrn_detector                   'CCD plate'
_diffrn_detector_area_resol_mean   5.2913
_diffrn_detector_type              AtlasS2
_diffrn_measured_fraction_theta_full  0.998
_diffrn_measured_fraction_theta_max  0.969
_diffrn_measurement_details
;
List of Runs (angles in degrees, time in seconds):

  # Type    Start    End  Width  t~exp~   \w     \q     \k     \f   Frames
--------------------------------------------------------------------------
  1  \w   -113.00 -14.00   1.00    1.00    --  -41.14 -57.00-120.00   99
  2  \w    -12.00  28.00   1.00    1.00    --  -41.14  57.00  30.00   40
  3  \w    -62.00 -17.00   1.00    1.00    --  -41.14  57.00  30.00   45
  4  \w    -33.00  66.00   1.00    1.00    --   41.14 -38.00  90.00   99
  5  \w     56.00  89.00   1.00    1.00    --   41.14-125.00-180.00   33
  6  \w     27.00  53.00   1.00    1.00    --   41.14-125.00  90.00   26
  7  \w     29.00 130.00   1.00    1.00    --  105.29 -77.00 150.00  101
  8  \w     43.00 101.00   1.00    1.00    --  105.29-125.00  60.00   58
  9  \w    108.00 160.00   1.00    1.00    --  105.29 125.00  90.00   52
 10  \w     25.00 106.00   1.00    1.00    --  105.29 -94.00 -60.00   81
 11  \w    107.00 177.00   1.00    1.00    --  105.29  77.00 -30.00   70
 12  \w    106.00 165.00   1.00    1.00    --  105.29  77.00-180.00   59
 13  \w    109.00 168.00   1.00    1.00    --  105.29  77.00 120.00   59
 14  \w     65.00 112.00   1.00    1.00    --  105.29-125.00 -90.00   47
 15  \w     82.00 108.00   1.00    1.00    --  105.29-125.00-180.00   26
 16  \w     33.00 119.00   1.00    1.00    --  105.29 -45.00  30.00   86
 17  \w     77.00 177.00   1.00    1.00    --  105.29  30.00 -90.00  100
 18  \w     52.00 107.00   1.00    1.00    --  105.29 -98.00  64.63   55
;
_diffrn_measurement_device         'four-circle diffractometer'
_diffrn_measurement_device_type    'SuperNova, Dual, Cu at home/near, AtlasS2'
_diffrn_measurement_method         '\w scans'
_diffrn_orient_matrix_type        
 'CrysAlisPro convention (1999,Acta A55,543-557)'
_diffrn_orient_matrix_UB_11        0.0201465000
_diffrn_orient_matrix_UB_12        0.1425174000
_diffrn_orient_matrix_UB_13        -0.0315199000
_diffrn_orient_matrix_UB_21        -0.1771089000
_diffrn_orient_matrix_UB_22        0.0516091000
_diffrn_orient_matrix_UB_23        0.0260662000
_diffrn_orient_matrix_UB_31        0.0635575000
_diffrn_orient_matrix_UB_32        0.0046727000
_diffrn_orient_matrix_UB_33        0.0716326000
_diffrn_radiation_monochromator    mirror
_diffrn_radiation_probe            x-ray
_diffrn_radiation_type             'Cu K\a'
_diffrn_radiation_wavelength       1.54184
_diffrn_source                     'micro-focus sealed X-ray tube'
_diffrn_source_type                'SuperNova (Cu) X-ray Source'
_reflns_Friedel_coverage           0.000
_reflns_Friedel_fraction_full      .
_reflns_Friedel_fraction_max       .
_reflns_number_gt                  5831
_reflns_number_total               6299
_reflns_special_details
;
 Reflections were merged by SHELXL according to the crystal
 class for the calculation of statistics and refinement.
 
 Structure factors included contributions from the .fab file.
 
 _reflns_Friedel_fraction is defined as the number of unique
 Friedel pairs measured divided by the number that would be
 possible theoretically, ignoring centric projections and
 systematic absences.
;
_reflns_threshold_expression       'I > 2\s(I)'
_computing_cell_refinement         'CrysAlisPro 1.171.40.84a (Rigaku OD, 2020)'
_computing_data_collection         'CrysAlisPro 1.171.40.84a (Rigaku OD, 2020)'
_computing_data_reduction          'CrysAlisPro 1.171.40.84a (Rigaku OD, 2020)'
_computing_molecular_graphics      'Olex2 1.5 (Dolomanov et al., 2009)'
_computing_publication_material    'Olex2 1.5 (Dolomanov et al., 2009)'
_computing_structure_refinement    'SHELXL 2018/3 (Sheldrick, 2015)'
_computing_structure_solution      'olex2.solve 1.5 (Bourhis et al., 2015)'
_refine_diff_density_max           1.889
_refine_diff_density_min           -2.026
_refine_diff_density_rms           0.148
_refine_ls_extinction_coef         .
_refine_ls_extinction_method       none
_refine_ls_goodness_of_fit_ref     1.055
_refine_ls_hydrogen_treatment      constr
_refine_ls_matrix_type             full
_refine_ls_number_parameters       418
_refine_ls_number_reflns           6299
_refine_ls_number_restraints       4
_refine_ls_R_factor_all            0.0395
_refine_ls_R_factor_gt             0.0365
_refine_ls_restrained_S_all        1.137
_refine_ls_shift/su_max            0.001
_refine_ls_shift/su_mean           0.000
_refine_ls_structure_factor_coef   Fsqd
_refine_ls_weighting_details      
 'w=1/[\s^2^(Fo^2^)+(0.0446P)^2^] where P=(Fo^2^+2Fc^2^)/3'
_refine_ls_weighting_scheme        calc
_refine_ls_wR_factor_gt            0.0902
_refine_ls_wR_factor_ref           0.0930
_refine_special_details            ?
_olex2_refinement_description
;
1. Restrained distances
 H2-H3A
 2.1 with sigma of 0.02
 H3A-H2
 2.2 with sigma of 0.02
 H17-H4A
 2.3 with sigma of 0.02
 H4A-H17
 2.3 with sigma of 0.02
2.a Secondary CH2 refined with riding coordinates:
 N3(H3A,H3B), N4(H4A,H4B), C32(H32A,H32B), C31(H31A,H31B)
2.b Aromatic/amide H refined with riding coordinates:
 C27(H27), C23(H23), C7(H7), C12(H12), C22(H22), C15(H15), C2(H2), C8(H8),
 C20(H20), C29(H29), C30(H30), C17(H17), C14(H14), C5(H5), C3(H3), C19(H19),
 C18(H18), C4(H4)
;
_atom_sites_solution_hydrogens     geom
_atom_sites_solution_primary       iterative
_atom_sites_solution_secondary     ?
loop_
  _atom_site_label
  _atom_site_type_symbol
  _atom_site_fract_x
  _atom_site_fract_y
  _atom_site_fract_z
  _atom_site_U_iso_or_equiv
  _atom_site_adp_type
  _atom_site_occupancy
  _atom_site_site_symmetry_order
  _atom_site_calc_flag
  _atom_site_refinement_flags_posn
  _atom_site_refinement_flags_adp
  _atom_site_refinement_flags_occupancy
  _atom_site_disorder_assembly
  _atom_site_disorder_group
 Ir1 Ir 0.35020(2) 0.52680(2) 0.23333(2) 0.01686(8) Uani 1 1 d . . . . .
 P002 P 0.000000 0.500000 0.500000 0.0369(5) Uani 1 2 d S . P . .
 P003 P 0.000000 1.000000 0.000000 0.0568(8) Uani 1 2 d S . P . .
 F2 F 0.9317(4) 0.5536(3) 0.08720(16) 0.0361(7) Uani 1 1 d . . . . .
 F1 F 0.4970(5) 0.0511(3) 0.41503(17) 0.0425(8) Uani 1 1 d . . . . .
 N1 N 0.4687(5) 0.6393(4) 0.2774(2) 0.0179(7) Uani 1 1 d . . . . .
 N2 N 0.2669(5) 0.3922(4) 0.18986(19) 0.0179(7) Uani 1 1 d . . . . .
 F008 F -0.1789(5) 0.4840(5) 0.53187(18) 0.0600(12) Uani 1 1 d . . . . .
 F009 F -0.0271(6) 0.4411(5) 0.43426(19) 0.0635(12) Uani 1 1 d . . . . .
 F00A F -0.0721(6) 0.6424(5) 0.4545(2) 0.0690(13) Uani 1 1 d . . . . .
 N3 N 0.1809(5) 0.6738(4) 0.1552(2) 0.0250(9) Uani 1 1 d . . . . .
 H3A H 0.240061 0.723908 0.122372 0.030 Uiso 1 1 calc DR U . . .
 H3B H 0.129697 0.630838 0.131551 0.030 Uiso 1 1 calc R U . . .
 N4 N 0.1432(5) 0.6045(4) 0.3027(2) 0.0227(8) Uani 1 1 d . . . . .
 H4A H 0.116388 0.536722 0.337067 0.027 Uiso 1 1 calc DR U . . .
 H4B H 0.174702 0.660608 0.324890 0.027 Uiso 1 1 calc R U . . .
 F00D F 0.0434(8) 1.1403(5) -0.0256(2) 0.088(2) Uani 1 1 d . . . . .
 C11 C 0.4519(6) 0.3897(4) 0.3169(2) 0.0192(9) Uani 1 1 d . . . . .
 C26 C 0.5338(6) 0.4880(5) 0.1624(2) 0.0197(9) Uani 1 1 d . . . . .
 C24 C 0.3563(6) 0.3652(5) 0.1303(2) 0.0204(9) Uani 1 1 d . . . . .
 C16 C 0.1342(6) 0.3322(5) 0.2135(2) 0.0204(9) Uani 1 1 d . . . . .
 C10 C 0.5150(6) 0.4416(5) 0.3663(2) 0.0222(9) Uani 1 1 d . . . . .
 C25 C 0.5079(6) 0.4143(5) 0.1145(2) 0.0204(9) Uani 1 1 d . . . . .
 C1 C 0.4961(6) 0.7652(5) 0.2472(3) 0.0231(10) Uani 1 1 d . . . . .
 C9 C 0.5237(6) 0.5799(5) 0.3432(2) 0.0204(9) Uani 1 1 d . . . . .
 C27 C 0.6827(6) 0.5347(5) 0.1514(2) 0.0231(9) Uani 1 1 d . . . . .
 H27 H 0.707532 0.584754 0.182059 0.028 Uiso 1 1 calc R U . . .
 F00N F -0.0950(9) 1.0389(6) 0.0697(3) 0.100(2) Uani 1 1 d . . . . .
 F00O F 0.1628(9) 0.9475(6) 0.0440(3) 0.117(3) Uani 1 1 d . . . . .
 C21 C 0.0809(6) 0.2576(5) 0.1717(3) 0.0269(10) Uani 1 1 d . . . . .
 C23 C 0.3042(6) 0.2935(5) 0.0876(3) 0.0265(10) Uani 1 1 d . . . . .
 H23 H 0.365560 0.280244 0.044855 0.032 Uiso 1 1 calc R U . . .
 C28 C 0.7896(6) 0.5067(5) 0.0962(3) 0.0273(11) Uani 1 1 d . . . . .
 C7 C 0.6063(6) 0.7722(5) 0.3585(3) 0.0293(11) Uani 1 1 d . . . . .
 H7 H 0.645074 0.818418 0.387561 0.035 Uiso 1 1 calc R U . . .
 C12 C 0.4462(6) 0.2575(5) 0.3341(2) 0.0232(9) Uani 1 1 d . . . . .
 H12 H 0.404665 0.219906 0.301472 0.028 Uiso 1 1 calc R U . . .
 C22 C 0.1659(7) 0.2426(5) 0.1068(3) 0.0299(11) Uani 1 1 d . . . . .
 H22 H 0.128098 0.197846 0.076709 0.036 Uiso 1 1 calc R U . . .
 C6 C 0.5647(6) 0.8338(5) 0.2877(3) 0.0288(11) Uani 1 1 d . . . . .
 C15 C 0.5700(6) 0.3625(5) 0.4322(3) 0.0277(10) Uani 1 1 d . . . . .
 H15 H 0.611482 0.399496 0.465100 0.033 Uiso 1 1 calc R U . . .
 C32 C -0.0022(6) 0.6744(6) 0.2608(3) 0.0319(12) Uani 1 1 d . . . . .
 H32A H -0.080923 0.729151 0.288874 0.038 Uiso 1 1 calc R U . . .
 H32B H -0.057966 0.610312 0.248826 0.038 Uiso 1 1 calc R U . . .
 C13 C 0.5017(7) 0.1810(5) 0.3991(3) 0.0298(11) Uani 1 1 d . . . . .
 C2 C 0.4667(7) 0.8245(5) 0.1751(3) 0.0311(11) Uani 1 1 d . . . . .
 H2 H 0.423821 0.778886 0.147008 0.037 Uiso 1 1 calc DR U . . .
 C8 C 0.5906(6) 0.6463(5) 0.3848(3) 0.0282(11) Uani 1 1 d . . . . .
 H8 H 0.624699 0.602180 0.431645 0.034 Uiso 1 1 calc R U . . .
 C31 C 0.0555(7) 0.7604(5) 0.1930(3) 0.0323(12) Uani 1 1 d . . . . .
 H31A H -0.038199 0.804723 0.162060 0.039 Uiso 1 1 calc R U . . .
 H31B H 0.104144 0.828656 0.204704 0.039 Uiso 1 1 calc R U . . .
 C20 C -0.0603(7) 0.2030(6) 0.1965(3) 0.0356(12) Uani 1 1 d . . . . .
 H20 H -0.099400 0.154915 0.168532 0.043 Uiso 1 1 calc R U . . .
 C29 C 0.7666(7) 0.4332(6) 0.0503(3) 0.0311(11) Uani 1 1 d . . . . .
 H29 H 0.845727 0.415041 0.013217 0.037 Uiso 1 1 calc R U . . .
 C30 C 0.6206(6) 0.3859(5) 0.0605(3) 0.0286(11) Uani 1 1 d . . . . .
 H30 H 0.599477 0.334000 0.030076 0.034 Uiso 1 1 calc R U . . .
 C17 C 0.0559(6) 0.3374(5) 0.2795(3) 0.0283(11) Uani 1 1 d . . . . .
 H17 H 0.098591 0.378378 0.310131 0.034 Uiso 1 1 calc DR U . . .
 C14 C 0.5639(7) 0.2303(5) 0.4492(3) 0.0326(12) Uani 1 1 d . . . . .
 H14 H 0.600818 0.174963 0.493610 0.039 Uiso 1 1 calc R U . . .
 C5 C 0.5941(7) 0.9603(5) 0.2539(3) 0.0396(14) Uani 1 1 d . . . . .
 H5 H 0.637300 1.007828 0.280787 0.047 Uiso 1 1 calc R U . . .
 C3 C 0.4981(8) 0.9465(6) 0.1439(3) 0.0410(14) Uani 1 1 d . . . . .
 H3 H 0.476495 0.984666 0.094969 0.049 Uiso 1 1 calc R U . . .
 C19 C -0.1388(8) 0.2189(6) 0.2593(4) 0.0435(14) Uani 1 1 d . . . . .
 H19 H -0.234686 0.184230 0.274431 0.052 Uiso 1 1 calc R U . . .
 C18 C -0.0806(7) 0.2862(6) 0.3026(3) 0.0362(12) Uani 1 1 d . . . . .
 H18 H -0.135236 0.295900 0.347156 0.043 Uiso 1 1 calc R U . . .
 C4 C 0.5624(8) 1.0148(6) 0.1848(4) 0.0460(16) Uani 1 1 d . . . . .
 H4 H 0.583567 1.099598 0.163574 0.055 Uiso 1 1 calc R U . . .

loop_
  _atom_site_aniso_label
  _atom_site_aniso_U_11
  _atom_site_aniso_U_22
  _atom_site_aniso_U_33
  _atom_site_aniso_U_23
  _atom_site_aniso_U_13
  _atom_site_aniso_U_12
 Ir1 0.01625(12) 0.01856(11) 0.01596(11) -0.00290(7) -0.00006(7) -0.00537(7)
 P002 0.0272(10) 0.0643(14) 0.0176(8) -0.0050(8) -0.0012(7) -0.0103(9)
 P003 0.112(2) 0.0391(13) 0.0282(10) 0.0001(9) -0.0199(12) -0.0354(14)
 F2 0.0239(16) 0.049(2) 0.0367(16) -0.0053(14) 0.0080(13) -0.0188(14)
 F1 0.067(2) 0.0228(16) 0.0330(16) 0.0035(13) -0.0067(16) -0.0091(15)
 N1 0.0125(18) 0.0181(18) 0.0247(18) -0.0068(15) -0.0007(14) -0.0043(14)
 N2 0.0174(19) 0.0222(19) 0.0164(17) -0.0042(14) -0.0008(14) -0.0091(15)
 F008 0.034(2) 0.115(4) 0.0299(17) -0.009(2) 0.0033(15) -0.023(2)
 F009 0.066(3) 0.107(4) 0.0314(18) -0.026(2) 0.0060(18) -0.038(3)
 F00A 0.059(3) 0.075(3) 0.060(3) 0.014(2) -0.015(2) -0.013(2)
 N3 0.024(2) 0.030(2) 0.0207(19) -0.0035(16) -0.0043(16) -0.0049(17)
 N4 0.019(2) 0.027(2) 0.0208(18) -0.0054(16) 0.0006(15) -0.0037(16)
 F00D 0.185(6) 0.056(3) 0.042(2) 0.0030(19) -0.036(3) -0.065(3)
 C11 0.018(2) 0.021(2) 0.016(2) -0.0030(16) -0.0012(17) 0.0006(17)
 C26 0.022(2) 0.021(2) 0.015(2) -0.0004(16) -0.0029(17) -0.0050(18)
 C24 0.020(2) 0.024(2) 0.016(2) -0.0030(17) -0.0002(17) -0.0045(18)
 C16 0.018(2) 0.021(2) 0.023(2) -0.0016(17) -0.0012(17) -0.0076(18)
 C10 0.018(2) 0.024(2) 0.021(2) -0.0029(18) 0.0005(17) -0.0013(18)
 C25 0.017(2) 0.025(2) 0.018(2) -0.0042(17) 0.0010(17) -0.0050(18)
 C1 0.019(2) 0.017(2) 0.033(2) -0.0065(19) 0.0002(19) -0.0036(18)
 C9 0.017(2) 0.025(2) 0.020(2) -0.0087(18) -0.0005(17) -0.0027(18)
 C27 0.020(2) 0.024(2) 0.025(2) -0.0001(18) 0.0001(18) -0.0098(19)
 F00N 0.179(7) 0.076(4) 0.052(3) -0.019(3) 0.008(3) -0.043(4)
 F00O 0.145(6) 0.096(5) 0.111(4) 0.040(4) -0.071(4) -0.065(4)
 C21 0.025(3) 0.023(2) 0.034(3) -0.005(2) -0.003(2) -0.010(2)
 C23 0.026(3) 0.028(3) 0.027(2) -0.011(2) 0.001(2) -0.006(2)
 C28 0.015(2) 0.037(3) 0.028(2) 0.003(2) 0.0026(19) -0.012(2)
 C7 0.025(3) 0.033(3) 0.036(3) -0.018(2) -0.002(2) -0.008(2)
 C12 0.025(2) 0.023(2) 0.021(2) -0.0037(18) 0.0007(18) -0.0042(19)
 C22 0.032(3) 0.032(3) 0.028(2) -0.007(2) -0.010(2) -0.008(2)
 C6 0.020(2) 0.023(2) 0.046(3) -0.013(2) -0.002(2) -0.0044(19)
 C15 0.025(3) 0.036(3) 0.021(2) -0.006(2) -0.0019(19) -0.003(2)
 C32 0.011(2) 0.048(3) 0.030(3) -0.005(2) 0.0021(19) 0.002(2)
 C13 0.038(3) 0.025(3) 0.024(2) -0.001(2) 0.004(2) -0.007(2)
 C2 0.034(3) 0.025(3) 0.034(3) 0.000(2) -0.006(2) -0.012(2)
 C8 0.026(3) 0.035(3) 0.026(2) -0.011(2) -0.003(2) -0.007(2)
 C31 0.027(3) 0.032(3) 0.030(3) -0.001(2) -0.005(2) 0.006(2)
 C20 0.026(3) 0.031(3) 0.054(3) -0.009(2) -0.004(2) -0.013(2)
 C29 0.027(3) 0.042(3) 0.022(2) -0.005(2) 0.009(2) -0.008(2)
 C30 0.025(3) 0.039(3) 0.023(2) -0.011(2) 0.0051(19) -0.008(2)
 C17 0.023(3) 0.026(2) 0.037(3) -0.005(2) 0.004(2) -0.011(2)
 C14 0.039(3) 0.031(3) 0.022(2) 0.004(2) -0.008(2) -0.003(2)
 C5 0.037(3) 0.023(3) 0.063(4) -0.010(3) -0.009(3) -0.011(2)
 C3 0.046(4) 0.029(3) 0.044(3) 0.005(2) -0.006(3) -0.014(3)
 C19 0.035(3) 0.034(3) 0.064(4) -0.010(3) 0.008(3) -0.019(3)
 C18 0.026(3) 0.041(3) 0.041(3) -0.006(2) 0.014(2) -0.016(2)
 C4 0.047(4) 0.020(3) 0.070(4) 0.003(3) -0.012(3) -0.016(3)

_geom_special_details
;
 All esds (except the esd in the dihedral angle between two l.s. planes)
 are estimated using the full covariance matrix.  The cell esds are taken
 into account individually in the estimation of esds in distances, angles
 and torsion angles; correlations between esds in cell parameters are only
 used when they are defined by crystal symmetry.  An approximate (isotropic)
 treatment of cell esds is used for estimating esds involving l.s. planes.
;
loop_
  _geom_bond_atom_site_label_1
  _geom_bond_atom_site_label_2
  _geom_bond_distance
  _geom_bond_site_symmetry_2
  _geom_bond_publ_flag
 Ir1 N1 2.082(3) . ?
 Ir1 N2 2.097(3) . ?
 Ir1 N3 2.240(4) . ?
 Ir1 N4 2.217(4) . ?
 Ir1 C11 2.010(4) . ?
 Ir1 C26 1.995(5) . ?
 P002 F008 1.591(4) . ?
 P002 F008 1.591(4) 2_566 ?
 P002 F009 1.597(4) 2_566 ?
 P002 F009 1.597(4) . ?
 P002 F00A 1.582(4) 2_566 ?
 P002 F00A 1.582(4) . ?
 P003 F00D 1.576(4) . ?
 P003 F00D 1.576(4) 2_575 ?
 P003 F00N 1.587(5) 2_575 ?
 P003 F00N 1.587(5) . ?
 P003 F00O 1.593(6) 2_575 ?
 P003 F00O 1.593(6) . ?
 F2 C28 1.371(5) . ?
 F1 C13 1.359(6) . ?
 N1 C1 1.393(6) . ?
 N1 C9 1.348(6) . ?
 N2 C24 1.362(6) . ?
 N2 C16 1.390(6) . ?
 N3 H3A 0.9100 . ?
 N3 H3B 0.9100 . ?
 N3 C31 1.492(7) . ?
 N4 H4A 0.9100 . ?
 N4 H4B 0.9100 . ?
 N4 C32 1.477(6) . ?
 C11 C10 1.403(6) . ?
 C11 C12 1.384(6) . ?
 C26 C25 1.408(6) . ?
 C26 C27 1.422(6) . ?
 C24 C25 1.456(6) . ?
 C24 C23 1.406(6) . ?
 C16 C21 1.422(6) . ?
 C16 C17 1.379(7) . ?
 C10 C9 1.456(7) . ?
 C10 C15 1.400(6) . ?
 C25 C30 1.377(7) . ?
 C1 C6 1.423(7) . ?
 C1 C2 1.401(7) . ?
 C9 C8 1.413(6) . ?
 C27 H27 0.9500 . ?
 C27 C28 1.368(7) . ?
 C21 C22 1.401(7) . ?
 C21 C20 1.425(7) . ?
 C23 H23 0.9500 . ?
 C23 C22 1.369(7) . ?
 C28 C29 1.367(8) . ?
 C7 H7 0.9500 . ?
 C7 C6 1.404(8) . ?
 C7 C8 1.352(7) . ?
 C12 H12 0.9500 . ?
 C12 C13 1.379(7) . ?
 C22 H22 0.9500 . ?
 C6 C5 1.419(7) . ?
 C15 H15 0.9500 . ?
 C15 C14 1.385(8) . ?
 C32 H32A 0.9900 . ?
 C32 H32B 0.9900 . ?
 C32 C31 1.512(7) . ?
 C13 C14 1.394(8) . ?
 C2 H2 0.9500 . ?
 C2 C3 1.371(7) . ?
 C8 H8 0.9500 . ?
 C31 H31A 0.9900 . ?
 C31 H31B 0.9900 . ?
 C20 H20 0.9500 . ?
 C20 C19 1.349(9) . ?
 C29 H29 0.9500 . ?
 C29 C30 1.403(7) . ?
 C30 H30 0.9500 . ?
 C17 H17 0.9500 . ?
 C17 C18 1.366(7) . ?
 C14 H14 0.9500 . ?
 C5 H5 0.9500 . ?
 C5 C4 1.344(9) . ?
 C3 H3 0.9500 . ?
 C3 C4 1.405(9) . ?
 C19 H19 0.9500 . ?
 C19 C18 1.404(9) . ?
 C18 H18 0.9500 . ?
 C4 H4 0.9500 . ?

loop_
  _geom_angle_atom_site_label_1
  _geom_angle_atom_site_label_2
  _geom_angle_atom_site_label_3
  _geom_angle
  _geom_angle_site_symmetry_1
  _geom_angle_site_symmetry_3
  _geom_angle_publ_flag
 N1 Ir1 N2 170.87(15) . . ?
 N1 Ir1 N3 104.80(15) . . ?
 N1 Ir1 N4 81.59(15) . . ?
 N2 Ir1 N3 82.53(15) . . ?
 N2 Ir1 N4 105.70(15) . . ?
 N4 Ir1 N3 76.65(15) . . ?
 C11 Ir1 N1 79.87(17) . . ?
 C11 Ir1 N2 94.24(16) . . ?
 C11 Ir1 N3 166.31(17) . . ?
 C11 Ir1 N4 91.55(16) . . ?
 C26 Ir1 N1 94.11(17) . . ?
 C26 Ir1 N2 79.48(17) . . ?
 C26 Ir1 N3 96.41(16) . . ?
 C26 Ir1 N4 170.48(16) . . ?
 C26 Ir1 C11 96.06(18) . . ?
 F008 P002 F008 180.0 2_566 . ?
 F008 P002 F009 90.4(2) . 2_566 ?
 F008 P002 F009 89.6(2) 2_566 2_566 ?
 F008 P002 F009 89.6(2) . . ?
 F008 P002 F009 90.4(2) 2_566 . ?
 F009 P002 F009 180.0 . 2_566 ?
 F00A P002 F008 90.8(2) . . ?
 F00A P002 F008 90.8(2) 2_566 2_566 ?
 F00A P002 F008 89.2(2) 2_566 . ?
 F00A P002 F008 89.2(2) . 2_566 ?
 F00A P002 F009 88.7(3) 2_566 2_566 ?
 F00A P002 F009 88.7(3) . . ?
 F00A P002 F009 91.3(3) . 2_566 ?
 F00A P002 F009 91.3(3) 2_566 . ?
 F00A P002 F00A 180.0 2_566 . ?
 F00D P003 F00D 180.00(13) . 2_575 ?
 F00D P003 F00N 89.1(3) . 2_575 ?
 F00D P003 F00N 90.9(3) 2_575 2_575 ?
 F00D P003 F00N 89.1(3) 2_575 . ?
 F00D P003 F00N 90.9(3) . . ?
 F00D P003 F00O 89.6(3) . 2_575 ?
 F00D P003 F00O 89.6(3) 2_575 . ?
 F00D P003 F00O 90.4(3) 2_575 2_575 ?
 F00D P003 F00O 90.4(3) . . ?
 F00N P003 F00N 180.0 2_575 . ?
 F00N P003 F00O 91.5(4) . 2_575 ?
 F00N P003 F00O 88.5(4) . . ?
 F00N P003 F00O 91.5(4) 2_575 . ?
 F00N P003 F00O 88.5(4) 2_575 2_575 ?
 F00O P003 F00O 180.0 2_575 . ?
 C1 N1 Ir1 128.0(3) . . ?
 C9 N1 Ir1 114.0(3) . . ?
 C9 N1 C1 118.0(4) . . ?
 C24 N2 Ir1 113.3(3) . . ?
 C24 N2 C16 118.5(4) . . ?
 C16 N2 Ir1 128.2(3) . . ?
 Ir1 N3 H3A 109.5 . . ?
 Ir1 N3 H3B 109.5 . . ?
 H3A N3 H3B 108.1 . . ?
 C31 N3 Ir1 110.6(3) . . ?
 C31 N3 H3A 109.5 . . ?
 C31 N3 H3B 109.5 . . ?
 Ir1 N4 H4A 109.4 . . ?
 Ir1 N4 H4B 109.4 . . ?
 H4A N4 H4B 108.0 . . ?
 C32 N4 Ir1 111.3(3) . . ?
 C32 N4 H4A 109.4 . . ?
 C32 N4 H4B 109.4 . . ?
 C10 C11 Ir1 113.8(3) . . ?
 C12 C11 Ir1 126.9(3) . . ?
 C12 C11 C10 118.8(4) . . ?
 C25 C26 Ir1 116.3(3) . . ?
 C25 C26 C27 116.4(4) . . ?
 C27 C26 Ir1 127.1(3) . . ?
 N2 C24 C25 115.9(4) . . ?
 N2 C24 C23 121.3(4) . . ?
 C23 C24 C25 122.8(4) . . ?
 N2 C16 C21 120.6(4) . . ?
 C17 C16 N2 121.3(4) . . ?
 C17 C16 C21 118.0(4) . . ?
 C11 C10 C9 115.6(4) . . ?
 C15 C10 C11 121.3(4) . . ?
 C15 C10 C9 123.1(4) . . ?
 C26 C25 C24 113.7(4) . . ?
 C30 C25 C26 122.5(4) . . ?
 C30 C25 C24 123.7(4) . . ?
 N1 C1 C6 120.7(4) . . ?
 N1 C1 C2 121.2(4) . . ?
 C2 C1 C6 118.0(4) . . ?
 N1 C9 C10 114.7(4) . . ?
 N1 C9 C8 122.1(4) . . ?
 C8 C9 C10 123.1(4) . . ?
 C26 C27 H27 120.4 . . ?
 C28 C27 C26 119.1(4) . . ?
 C28 C27 H27 120.4 . . ?
 C16 C21 C20 118.6(5) . . ?
 C22 C21 C16 119.3(4) . . ?
 C22 C21 C20 122.1(5) . . ?
 C24 C23 H23 119.6 . . ?
 C22 C23 C24 120.7(5) . . ?
 C22 C23 H23 119.6 . . ?
 C27 C28 F2 117.4(4) . . ?
 C29 C28 F2 117.8(4) . . ?
 C29 C28 C27 124.8(4) . . ?
 C6 C7 H7 120.4 . . ?
 C8 C7 H7 120.4 . . ?
 C8 C7 C6 119.2(4) . . ?
 C11 C12 H12 120.4 . . ?
 C13 C12 C11 119.2(4) . . ?
 C13 C12 H12 120.4 . . ?
 C21 C22 H22 120.5 . . ?
 C23 C22 C21 119.0(4) . . ?
 C23 C22 H22 120.5 . . ?
 C7 C6 C1 119.0(5) . . ?
 C7 C6 C5 122.5(5) . . ?
 C5 C6 C1 118.4(5) . . ?
 C10 C15 H15 120.1 . . ?
 C14 C15 C10 119.8(5) . . ?
 C14 C15 H15 120.1 . . ?
 N4 C32 H32A 110.1 . . ?
 N4 C32 H32B 110.1 . . ?
 N4 C32 C31 108.0(4) . . ?
 H32A C32 H32B 108.4 . . ?
 C31 C32 H32A 110.1 . . ?
 C31 C32 H32B 110.1 . . ?
 F1 C13 C12 118.6(4) . . ?
 F1 C13 C14 118.2(4) . . ?
 C12 C13 C14 123.2(5) . . ?
 C1 C2 H2 119.0 . . ?
 C3 C2 C1 122.0(5) . . ?
 C3 C2 H2 119.0 . . ?
 C9 C8 H8 119.8 . . ?
 C7 C8 C9 120.5(5) . . ?
 C7 C8 H8 119.8 . . ?
 N3 C31 C32 107.6(4) . . ?
 N3 C31 H31A 110.2 . . ?
 N3 C31 H31B 110.2 . . ?
 C32 C31 H31A 110.2 . . ?
 C32 C31 H31B 110.2 . . ?
 H31A C31 H31B 108.5 . . ?
 C21 C20 H20 119.7 . . ?
 C19 C20 C21 120.5(5) . . ?
 C19 C20 H20 119.7 . . ?
 C28 C29 H29 121.6 . . ?
 C28 C29 C30 116.8(5) . . ?
 C30 C29 H29 121.6 . . ?
 C25 C30 C29 120.3(5) . . ?
 C25 C30 H30 119.9 . . ?
 C29 C30 H30 119.9 . . ?
 C16 C17 H17 118.6 . . ?
 C18 C17 C16 122.8(5) . . ?
 C18 C17 H17 118.6 . . ?
 C15 C14 C13 117.8(4) . . ?
 C15 C14 H14 121.1 . . ?
 C13 C14 H14 121.1 . . ?
 C6 C5 H5 119.1 . . ?
 C4 C5 C6 121.8(5) . . ?
 C4 C5 H5 119.1 . . ?
 C2 C3 H3 120.2 . . ?
 C2 C3 C4 119.6(5) . . ?
 C4 C3 H3 120.2 . . ?
 C20 C19 H19 119.6 . . ?
 C20 C19 C18 120.8(5) . . ?
 C18 C19 H19 119.6 . . ?
 C17 C18 C19 118.9(5) . . ?
 C17 C18 H18 120.6 . . ?
 C19 C18 H18 120.6 . . ?
 C5 C4 C3 120.2(5) . . ?
 C5 C4 H4 119.9 . . ?
 C3 C4 H4 119.9 . . ?

loop_
  _geom_torsion_atom_site_label_1
  _geom_torsion_atom_site_label_2
  _geom_torsion_atom_site_label_3
  _geom_torsion_atom_site_label_4
  _geom_torsion
  _geom_torsion_site_symmetry_1
  _geom_torsion_site_symmetry_2
  _geom_torsion_site_symmetry_3
  _geom_torsion_site_symmetry_4
  _geom_torsion_publ_flag
 Ir1 N1 C1 C6 173.5(4) . . . . ?
 Ir1 N1 C1 C2 -10.5(7) . . . . ?
 Ir1 N1 C9 C10 9.7(5) . . . . ?
 Ir1 N1 C9 C8 -172.7(4) . . . . ?
 Ir1 N2 C24 C25 10.3(5) . . . . ?
 Ir1 N2 C24 C23 -170.1(4) . . . . ?
 Ir1 N2 C16 C21 171.0(3) . . . . ?
 Ir1 N2 C16 C17 -12.3(7) . . . . ?
 Ir1 N3 C31 C32 -41.8(5) . . . . ?
 Ir1 N4 C32 C31 -43.8(5) . . . . ?
 Ir1 C11 C10 C9 -10.6(5) . . . . ?
 Ir1 C11 C10 C15 171.3(4) . . . . ?
 Ir1 C11 C12 C13 -170.5(4) . . . . ?
 Ir1 C26 C25 C24 -6.7(5) . . . . ?
 Ir1 C26 C25 C30 176.7(4) . . . . ?
 Ir1 C26 C27 C28 -174.7(4) . . . . ?
 F2 C28 C29 C30 179.8(5) . . . . ?
 F1 C13 C14 C15 179.2(5) . . . . ?
 N1 C1 C6 C7 0.7(7) . . . . ?
 N1 C1 C6 C5 178.4(5) . . . . ?
 N1 C1 C2 C3 -177.8(5) . . . . ?
 N1 C9 C8 C7 -2.1(8) . . . . ?
 N2 C24 C25 C26 -2.8(6) . . . . ?
 N2 C24 C25 C30 173.8(4) . . . . ?
 N2 C24 C23 C22 -3.5(8) . . . . ?
 N2 C16 C21 C22 1.4(7) . . . . ?
 N2 C16 C21 C20 -177.1(5) . . . . ?
 N2 C16 C17 C18 176.1(5) . . . . ?
 N4 C32 C31 N3 56.4(5) . . . . ?
 C11 C10 C9 N1 0.4(6) . . . . ?
 C11 C10 C9 C8 -177.1(5) . . . . ?
 C11 C10 C15 C14 0.5(8) . . . . ?
 C11 C12 C13 F1 -179.4(5) . . . . ?
 C11 C12 C13 C14 0.1(8) . . . . ?
 C26 C25 C30 C29 -1.5(8) . . . . ?
 C26 C27 C28 F2 179.9(4) . . . . ?
 C26 C27 C28 C29 -1.5(8) . . . . ?
 C24 N2 C16 C21 -7.7(7) . . . . ?
 C24 N2 C16 C17 169.0(4) . . . . ?
 C24 C25 C30 C29 -177.8(5) . . . . ?
 C24 C23 C22 C21 -3.0(8) . . . . ?
 C16 N2 C24 C25 -170.8(4) . . . . ?
 C16 N2 C24 C23 8.8(7) . . . . ?
 C16 C21 C22 C23 3.9(8) . . . . ?
 C16 C21 C20 C19 -1.7(8) . . . . ?
 C16 C17 C18 C19 3.6(9) . . . . ?
 C10 C11 C12 C13 0.4(7) . . . . ?
 C10 C9 C8 C7 175.2(5) . . . . ?
 C10 C15 C14 C13 -0.1(8) . . . . ?
 C25 C26 C27 C28 0.3(7) . . . . ?
 C25 C24 C23 C22 176.1(5) . . . . ?
 C1 N1 C9 C10 -170.4(4) . . . . ?
 C1 N1 C9 C8 7.1(7) . . . . ?
 C1 C6 C5 C4 -1.5(9) . . . . ?
 C1 C2 C3 C4 0.3(10) . . . . ?
 C9 N1 C1 C6 -6.4(7) . . . . ?
 C9 N1 C1 C2 169.6(5) . . . . ?
 C9 C10 C15 C14 -177.4(5) . . . . ?
 C27 C26 C25 C24 177.8(4) . . . . ?
 C27 C26 C25 C30 1.2(7) . . . . ?
 C27 C28 C29 C30 1.2(8) . . . . ?
 C21 C16 C17 C18 -7.1(8) . . . . ?
 C21 C20 C19 C18 -1.9(10) . . . . ?
 C23 C24 C25 C26 177.6(4) . . . . ?
 C23 C24 C25 C30 -5.8(8) . . . . ?
 C28 C29 C30 C25 0.3(8) . . . . ?
 C7 C6 C5 C4 176.0(6) . . . . ?
 C12 C11 C10 C9 177.4(4) . . . . ?
 C12 C11 C10 C15 -0.6(7) . . . . ?
 C12 C13 C14 C15 -0.2(9) . . . . ?
 C22 C21 C20 C19 179.8(6) . . . . ?
 C6 C1 C2 C3 -1.7(8) . . . . ?
 C6 C7 C8 C9 -3.8(8) . . . . ?
 C6 C5 C4 C3 0.1(10) . . . . ?
 C15 C10 C9 N1 178.4(5) . . . . ?
 C15 C10 C9 C8 0.9(8) . . . . ?
 C2 C1 C6 C7 -175.4(5) . . . . ?
 C2 C1 C6 C5 2.3(8) . . . . ?
 C2 C3 C4 C5 0.5(10) . . . . ?
 C8 C7 C6 C1 4.4(8) . . . . ?
 C8 C7 C6 C5 -173.2(5) . . . . ?
 C20 C21 C22 C23 -177.6(5) . . . . ?
 C20 C19 C18 C17 1.1(10) . . . . ?
 C17 C16 C21 C22 -175.4(5) . . . . ?
 C17 C16 C21 C20 6.1(7) . . . . ?

_smtbx_masks_special_details       ?
loop_
  _smtbx_masks_void_nr
  _smtbx_masks_void_average_x
  _smtbx_masks_void_average_y
  _smtbx_masks_void_average_z
  _smtbx_masks_void_volume
  _smtbx_masks_void_count_electrons
  _smtbx_masks_void_content
 1 0.000 0.000 0.500 231.2 65.7 '1.2 CHCl3'

_smtbx_masks_void_probe_radius     1.2
_smtbx_masks_void_truncation_radius  1.2
_shelx_res_file
;
TITL a23061302a0229_a.res in P-1
    a23061302a0229.res
    created by SHELXL-2018/3 at 19:02:27 on 16-Jul-2023
REM Old TITL exp_3482 in P1 #1
REM SHELXT solution in P-1: R1 0.081, Rweak 0.012, Alpha 0.039
REM <I/s> 0.000 for 0 systematic absences, Orientation as input
REM Formula found by SHELXT: C35 N6 F8 Ir
CELL 1.54184 8.3615 10.698 19.256 76.136 84.487 77.048
ZERR 2 0.0003 0.0005 0.0007 0.004 0.003 0.003
LATT 1
SFAC C H F Ir N P
UNIT 64 52 16 2 8 2
DFIX 2.1 H2 H3a
DFIX 2.2 H3a H2
DFIX 2.3 H17 H4a
DFIX 2.3 H4a H17

L.S. 99
PLAN  1
TEMP -123
CONF
BOND
list 4
ABIN
MORE -1
BOND $H
fmap 2
acta
REM <olex2.extras>
REM <HklSrc "%.\\A23061302A0229.hkl">
REM </olex2.extras>

WGHT    0.044600
FVAR       0.37156
IR1   4    0.350196    0.526799    0.233328    11.00000    0.01625    0.01856 =
         0.01596   -0.00290   -0.00006   -0.00537
P002  6    0.000000    0.500000    0.500000    10.50000    0.02720    0.06433 =
         0.01756   -0.00500   -0.00119   -0.01034
P003  6    0.000000    1.000000    0.000000    10.50000    0.11191    0.03915 =
         0.02820    0.00010   -0.01988   -0.03544
F2    3    0.931733    0.553637    0.087201    11.00000    0.02390    0.04889 =
         0.03672   -0.00525    0.00803   -0.01882
F1    3    0.496991    0.051064    0.415029    11.00000    0.06729    0.02285 =
         0.03301    0.00348   -0.00670   -0.00905
N1    5    0.468727    0.639309    0.277369    11.00000    0.01249    0.01810 =
         0.02468   -0.00676   -0.00068   -0.00430
N2    5    0.266906    0.392238    0.189856    11.00000    0.01738    0.02218 =
         0.01640   -0.00424   -0.00076   -0.00911
F008  3   -0.178927    0.484021    0.531870    11.00000    0.03357    0.11546 =
         0.02989   -0.00903    0.00326   -0.02283
F009  3   -0.027074    0.441129    0.434260    11.00000    0.06564    0.10708 =
         0.03143   -0.02617    0.00601   -0.03841
F00A  3   -0.072096    0.642386    0.454452    11.00000    0.05914    0.07469 =
         0.06025    0.01380   -0.01516   -0.01289
N3    5    0.180904    0.673802    0.155207    11.00000    0.02371    0.02985 =
         0.02066   -0.00346   -0.00434   -0.00493
AFIX  23
H3A   2    0.240061    0.723908    0.122372    11.00000   -1.20000
H3B   2    0.129697    0.630838    0.131551    11.00000   -1.20000
AFIX   0
N4    5    0.143157    0.604495    0.302698    11.00000    0.01906    0.02725 =
         0.02083   -0.00543    0.00064   -0.00374
AFIX  23
H4A   2    0.116388    0.536722    0.337067    11.00000   -1.20000
H4B   2    0.174702    0.660608    0.324890    11.00000   -1.20000
AFIX   0

F00D  3    0.043365    1.140322   -0.025587    11.00000    0.18543    0.05568 =
         0.04216    0.00299   -0.03594   -0.06485
C11   1    0.451916    0.389712    0.316947    11.00000    0.01790    0.02097 =
         0.01605   -0.00302   -0.00117    0.00064
C26   1    0.533840    0.488010    0.162369    11.00000    0.02221    0.02070 =
         0.01487   -0.00039   -0.00288   -0.00499
C24   1    0.356312    0.365233    0.130301    11.00000    0.02037    0.02394 =
         0.01600   -0.00298   -0.00021   -0.00452
C16   1    0.134235    0.332216    0.213533    11.00000    0.01782    0.02054 =
         0.02287   -0.00157   -0.00117   -0.00762
C10   1    0.514964    0.441550    0.366291    11.00000    0.01800    0.02449 =
         0.02103   -0.00290    0.00048   -0.00128
C25   1    0.507861    0.414301    0.114505    11.00000    0.01721    0.02547 =
         0.01815   -0.00416    0.00101   -0.00500
C1    1    0.496082    0.765162    0.247206    11.00000    0.01923    0.01733 =
         0.03281   -0.00651    0.00024   -0.00363
C9    1    0.523745    0.579910    0.343203    11.00000    0.01672    0.02503 =
         0.02042   -0.00869   -0.00053   -0.00268
C27   1    0.682677    0.534727    0.151417    11.00000    0.01960    0.02415 =
         0.02513   -0.00012    0.00015   -0.00980
AFIX  43
H27   2    0.707532    0.584754    0.182059    11.00000   -1.20000
AFIX   0

F00N  3   -0.095014    1.038859    0.069700    11.00000    0.17856    0.07588 =
         0.05214   -0.01879    0.00814   -0.04293
F00O  3    0.162802    0.947502    0.044022    11.00000    0.14476    0.09554 =
         0.11087    0.03989   -0.07093   -0.06531
C21   1    0.080907    0.257604    0.171659    11.00000    0.02544    0.02276 =
         0.03430   -0.00508   -0.00262   -0.00989
C23   1    0.304156    0.293524    0.087570    11.00000    0.02623    0.02821 =
         0.02730   -0.01132    0.00073   -0.00557
AFIX  43
H23   2    0.365560    0.280244    0.044855    11.00000   -1.20000
AFIX   0
C28   1    0.789638    0.506693    0.096171    11.00000    0.01488    0.03671 =
         0.02756    0.00259    0.00264   -0.01183
C7    1    0.606300    0.772175    0.358498    11.00000    0.02523    0.03269 =
         0.03621   -0.01786   -0.00202   -0.00769
AFIX  43
H7    2    0.645074    0.818418    0.387561    11.00000   -1.20000
AFIX   0
C12   1    0.446230    0.257508    0.334080    11.00000    0.02452    0.02258 =
         0.02109   -0.00373    0.00074   -0.00422
AFIX  43
H12   2    0.404665    0.219906    0.301472    11.00000   -1.20000
AFIX   0
C22   1    0.165883    0.242643    0.106842    11.00000    0.03245    0.03186 =
         0.02814   -0.00733   -0.00952   -0.00840
AFIX  43
H22   2    0.128098    0.197846    0.076709    11.00000   -1.20000
AFIX   0
C6    1    0.564694    0.833777    0.287735    11.00000    0.01987    0.02310 =
         0.04595   -0.01267   -0.00173   -0.00439
C15   1    0.570018    0.362526    0.432174    11.00000    0.02469    0.03601 =
         0.02084   -0.00588   -0.00187   -0.00345
AFIX  43
H15   2    0.611482    0.399496    0.465100    11.00000   -1.20000
AFIX   0
C32   1   -0.002189    0.674422    0.260753    11.00000    0.01133    0.04775 =
         0.03011   -0.00539    0.00214    0.00229
AFIX  23
H32A  2   -0.080923    0.729151    0.288874    11.00000   -1.20000
H32B  2   -0.057966    0.610312    0.248826    11.00000   -1.20000
AFIX   0
C13   1    0.501666    0.181025    0.399091    11.00000    0.03754    0.02471 =
         0.02431   -0.00149    0.00429   -0.00711
C2    1    0.466735    0.824531    0.175110    11.00000    0.03441    0.02524 =
         0.03394    0.00017   -0.00633   -0.01215
AFIX  43
H2    2    0.423821    0.778886    0.147008    11.00000   -1.20000
AFIX   0
C8    1    0.590569    0.646317    0.384817    11.00000    0.02568    0.03527 =
         0.02615   -0.01069   -0.00308   -0.00669
AFIX  43
H8    2    0.624699    0.602180    0.431645    11.00000   -1.20000
AFIX   0
C31   1    0.055464    0.760397    0.192961    11.00000    0.02692    0.03190 =
         0.03009   -0.00113   -0.00502    0.00582
AFIX  23
H31A  2   -0.038199    0.804723    0.162060    11.00000   -1.20000
H31B  2    0.104144    0.828656    0.204704    11.00000   -1.20000
AFIX   0
C20   1   -0.060258    0.202975    0.196463    11.00000    0.02641    0.03052 =
         0.05370   -0.00898   -0.00399   -0.01344
AFIX  43
H20   2   -0.099400    0.154915    0.168532    11.00000   -1.20000
AFIX   0
C29   1    0.766622    0.433193    0.050273    11.00000    0.02662    0.04188 =
         0.02193   -0.00499    0.00940   -0.00777
AFIX  43
H29   2    0.845727    0.415041    0.013217    11.00000   -1.20000
AFIX   0
C30   1    0.620641    0.385871    0.060510    11.00000    0.02508    0.03898 =
         0.02317   -0.01073    0.00514   -0.00813
AFIX  43
H30   2    0.599477    0.334000    0.030076    11.00000   -1.20000
AFIX   0
C17   1    0.055864    0.337431    0.279478    11.00000    0.02251    0.02559 =
         0.03748   -0.00458    0.00390   -0.01150
AFIX  43
H17   2    0.098591    0.378378    0.310131    11.00000   -1.20000
AFIX   0
C14   1    0.563867    0.230266    0.449222    11.00000    0.03872    0.03141 =
         0.02158    0.00430   -0.00757   -0.00316
AFIX  43
H14   2    0.600818    0.174963    0.493610    11.00000   -1.20000
AFIX   0
C5    1    0.594060    0.960292    0.253879    11.00000    0.03675    0.02303 =
         0.06270   -0.00992   -0.00936   -0.01072
AFIX  43
H5    2    0.637300    1.007828    0.280787    11.00000   -1.20000
AFIX   0
C3    1    0.498097    0.946526    0.143906    11.00000    0.04639    0.02920 =
         0.04420    0.00528   -0.00551   -0.01420
AFIX  43
H3    2    0.476495    0.984666    0.094969    11.00000   -1.20000
AFIX   0
C19   1   -0.138791    0.218940    0.259287    11.00000    0.03537    0.03439 =
         0.06385   -0.01031    0.00790   -0.01900
AFIX  43
H19   2   -0.234686    0.184230    0.274431    11.00000   -1.20000
AFIX   0
C18   1   -0.080628    0.286188    0.302572    11.00000    0.02620    0.04069 =
         0.04127   -0.00574    0.01439   -0.01642
AFIX  43
H18   2   -0.135236    0.295900    0.347156    11.00000   -1.20000
AFIX   0
C4    1    0.562413    1.014756    0.184811    11.00000    0.04718    0.02030 =
         0.07022    0.00257   -0.01197   -0.01606
AFIX  43
H4    2    0.583567    1.099598    0.163574    11.00000   -1.20000
AFIX   0
HKLF 4


REM  a23061302a0229_a.res in P-1
REM wR2 = 0.0930, GooF = S = 1.055, Restrained GooF = 1.137 for all data
REM R1 = 0.0365 for 5831 Fo > 4sig(Fo) and 0.0395 for all 6299 data
REM 418 parameters refined using 4 restraints

END

WGHT      0.0454      0.0000

REM Highest difference peak  1.889,  deepest hole -2.026,  1-sigma level  0.148
Q1    1   0.3461  0.5990  0.2557  11.00000  0.05    1.89
;
_shelx_res_checksum                32851
_shelx_hkl_file
;
  -9  -5   4  110.99   14.05
  -9  -5   5  109.96   13.69
  -9  -4   2  160.42   18.66
  -9  -4   3  352.40   28.55
  -9  -4   4  115.89   15.96
  -9  -4   5  182.09   19.16
  -9  -4   6  287.59   23.93
  -9  -4   7  273.85   22.16
  -9  -4   8  199.73   17.45
  -9  -3   1  390.27   31.22
  -9  -3   2   24.07    7.37
  -9  -3   3  602.96   40.30
  -9  -3   4   30.84    7.72
  -9  -3   5  243.01   23.65
  -9  -3   6  214.59   21.37
  -9  -3   7  277.43   23.72
  -9  -3   8  152.86   16.27
  -9  -3   9   96.66   11.79
  -9  -2   0   48.39   10.52
  -9  -2   1  573.61   40.40
  -9  -2   2    9.13    4.16
  -9  -2   3  780.80   48.21
  -9  -2   4    0.88    3.39
  -9  -2   5  476.97   35.09
  -9  -2   6  143.21   17.92
  -9  -2   7  525.83   35.07
  -9  -2   8   52.85    9.60
  -9  -2   9  204.04   18.68
  -9  -1  -1  466.49   35.75
  -9  -1   0   55.56   11.79
  -9  -1   1  335.83   30.38
  -9  -1   2   -1.66    5.98
  -9  -1   3  596.83   41.64
  -9  -1   4    3.39    3.31
  -9  -1   5  520.37   37.43
  -9  -1   6    4.19    3.57
  -9  -1   7  499.37   34.54
  -9  -1   8   13.44    4.91
  -9  -1   9  174.05   17.40
  -9   0  -2  201.27   22.44
  -9   0  -1  410.87   33.74
  -9   0   0   66.19   13.00
  -9   0   1  390.20   33.34
  -9   0   2   48.09   11.46
  -9   0   3  451.50   35.87
  -9   0   4   63.60   12.19
  -9   0   5  285.06   26.98
  -9   0   6  -14.90    6.10
  -9   0   7  327.93   27.37
  -9   0   8    6.00    2.36
  -9   0   9  160.75   16.80
  -9   1  -3   82.65   13.96
  -9   1  -2  256.67   25.46
  -9   1  -1  200.14   22.76
  -9   1   0  267.57   26.75
  -9   1   1  210.68   23.51
  -9   1   2  144.93   19.43
  -9   1   3  251.84   25.85
  -9   1   4   54.77   11.68
  -9   1   5  259.88   25.53
  -9   1   6   26.02    8.08
  -9   1   7  295.56   25.41
  -9   1   8  -21.57    6.47
  -9   1   9  133.63   14.76
  -9   2  -3   11.35    6.28
  -9   2  -2  230.05   22.76
  -9   2  -1   43.16   10.92
  -9   2   0  299.17   27.50
  -9   2   1  131.55   18.00
  -9   2   2   82.78   14.13
  -9   2   3  208.58   22.50
  -9   2   4  102.97   15.53
  -9   2   5  208.03   21.63
  -9   2   6   40.81    9.49
  -9   2   7  351.69   26.51
  -9   3  -2  327.10   24.71
  -9   3  -1    1.24    3.56
  -9   3   0  246.85   22.56
  -9   3   1   47.55    9.95
  -9   3   2   79.81   12.77
  -9   3   3   83.63   12.98
  -9   3   4  177.75   18.72
  -9   3   5  103.35   13.71
  -9   3   6   56.39    9.64
  -8  -6   3    8.25    4.00
  -8  -6   4  542.78   39.00
  -8  -6   5   29.62    9.26
  -8  -5   2  501.76   39.04
  -8  -5   3    8.33    7.09
  -8  -5   4  543.82   41.27
  -8  -5   5    7.78    5.50
  -8  -5   6  453.73   36.33
  -8  -5   7   78.22   14.47
  -8  -5   8  411.80   32.09
  -8  -4   1  308.84   30.03
  -8  -4   2  469.71   38.83
  -8  -4   3   45.28   11.47
  -8  -4   4  564.59   43.42
  -8  -4   5   -5.54    5.97
  -8  -4   6  438.20   36.79
  -8  -4   7    9.90    5.87
  -8  -4   8  621.22   42.79
  -8  -4   9   24.75    7.67
  -8  -4  10  235.79   22.48
  -8  -3   0  272.36   29.17
  -8  -3   1  397.01   35.82
  -8  -3   2  564.54   44.03
  -8  -3   3   41.19   12.12
  -8  -3   4  648.69   47.76
  -8  -3   5   23.56    8.69
  -8  -3   6  600.56   44.63
  -8  -3   7   12.42    6.62
  -8  -3   8  780.96   49.98
  -8  -3   9    4.14    4.09
  -8  -3  10  377.68   30.48
  -8  -3  11   53.77   10.54
  -8  -3  12  266.28   21.72
  -8  -2  -1  320.28   31.62
  -8  -2   0  330.16   32.61
  -8  -2   1  269.87   29.70
  -8  -2   2  572.01   45.02
  -8  -2   3  101.83   17.98
  -8  -2   4  671.09   49.14
  -8  -2   5   58.90   13.63
  -8  -2   6  386.89   35.58
  -8  -2   7    4.21    5.26
  -8  -2   8  624.43   44.45
  -8  -2   9   10.49    6.18
  -8  -2  10  343.48   29.62
  -8  -2  11   26.83    7.38
  -8  -2  12  232.39   21.23
  -8  -1  -2  119.10   19.38
  -8  -1  -1  363.99   35.25
  -8  -1   0  160.53   22.54
  -8  -1   1  229.72   27.87
  -8  -1   2  361.78   35.33
  -8  -1   3  237.59   28.31
  -8  -1   4  532.90   43.63
  -8  -1   5  126.46   20.48
  -8  -1   6  455.22   39.04
  -8  -1   7   11.13    7.31
  -8  -1   8  385.17   33.89
  -8  -1   9   52.45   12.15
  -8  -1  10  312.56   28.31
  -8  -1  11   10.77    3.84
  -8  -1  12  246.14   22.37
  -8  -1  13   14.05    5.13
  -8   0  -3  566.04   44.37
  -8   0  -2   20.44    7.93
  -8   0  -1  476.20   41.25
  -8   0   0   20.40    7.62
  -8   0   1  470.58   41.36
  -8   0   2   70.27   15.50
  -8   0   3  552.01   44.82
  -8   0   4  461.52   40.66
  -8   0   5  181.48   24.25
  -8   0   6  354.57   34.36
  -8   0   7   89.99   16.37
  -8   0   8  571.52   42.72
  -8   0   9   93.31   15.79
  -8   0  10  422.39   33.74
  -8   0  11   -1.69    3.55
  -8   0  12  286.96   24.39
  -8   1  -5  507.68   40.87
  -8   1  -4    8.00    5.63
  -8   1  -3  696.61   51.53
  -8   1  -2   10.96    7.05
  -8   1  -1  362.90   36.43
  -8   1   0    4.00    4.68
  -8   1   1  400.11   38.55
  -8   1   2   13.38    4.43
  -8   1   3  518.52   44.30
  -8   1   4  127.53   20.60
  -8   1   5  351.46   34.88
  -8   1   6   60.98   14.35
  -8   1   7  128.24   19.43
  -8   1   8  243.98   26.78
  -8   1   9   58.75   12.69
  -8   1  10  447.02   34.63
  -8   1  11    8.34    5.55
  -8   1  12  237.39   21.47
  -8   2  -5  424.18   36.89
  -8   2  -4   50.99   12.20
  -8   2  -3  666.72   49.97
  -8   2  -2   -1.24    4.97
  -8   2  -1  264.14   31.11
  -8   2   0   11.73    7.30
  -8   2   1  434.26   40.81
  -8   2   2   33.79   11.36
  -8   2   3  615.95   48.83
  -8   2   4   21.84    8.18
  -8   2   5  621.48   48.13
  -8   2   6   -4.91    7.85
  -8   2   7  329.38   32.37
  -8   2   8   70.92   14.19
  -8   2   9   26.16    8.69
  -8   2  10  278.00   25.85
  -8   2  11    9.36    5.55
  -8   3  -6  265.79   25.34
  -8   3  -5  123.28   17.89
  -8   3  -4  180.97   23.09
  -8   3  -3  399.93   36.42
  -8   3  -2   65.46   14.82
  -8   3  -1   98.02   18.10
  -8   3   0   15.59    7.98
  -8   3   1  378.71   37.05
  -8   3   2   18.73    7.73
  -8   3   3  881.48   59.45
  -8   3   4   19.15    9.12
  -8   3   5  453.28   39.60
  -8   3   6   56.66   12.87
  -8   3   7  163.63   21.78
  -8   3   8   88.23   15.07
  -8   3   9   96.39   14.60
  -8   3  10  209.03   20.75
  -8   4  -6  189.51   18.29
  -8   4  -5   80.53   13.19
  -8   4  -4  116.42   16.99
  -8   4  -3  208.85   23.72
  -8   4  -2   36.88    9.94
  -8   4  -1   84.85   16.10
  -8   4   0   67.67   13.93
  -8   4   1  407.10   36.33
  -8   4   2   26.77    9.08
  -8   4   3  642.03   46.97
  -8   4   4  100.94   17.38
  -8   4   5  358.72   32.66
  -8   4   6   81.55   14.63
  -8   4   7  188.53   21.63
  -8   4   8  163.44   18.77
  -8   4   9  212.71   19.99
  -8   5  -4   81.22   11.44
  -8   5  -3  123.11   15.24
  -8   5  -2   64.89   11.38
  -8   5  -1   98.93   14.38
  -8   5   0   88.45   14.35
  -8   5   1  331.44   28.89
  -8   5   2    1.82    3.50
  -8   5   3  234.47   23.92
  -8   5   4    6.73    4.16
  -8   5   5  166.10   18.86
  -8   5   6    1.42    2.82
  -8   5   7  160.50   16.70
  -7 -11  -1  285.14   19.40
  -7 -11   0   -2.06    2.05
  -7 -10   2    0.27    2.14
  -7 -10   3  293.20   18.36
  -7  -9   4   -4.96    3.24
  -7  -6   2  107.38   18.57
  -7  -6   3  271.84   29.62
  -7  -6   4  174.39   23.89
  -7  -6   5  428.86   38.24
  -7  -6   6   24.60    8.74
  -7  -6   7  491.12   40.48
  -7  -5   1  410.59   36.08
  -7  -5   2  363.52   34.98
  -7  -5   3  363.23   35.27
  -7  -5   4  628.70   48.62
  -7  -5   5  530.34   44.34
  -7  -5   6  142.51   22.03
  -7  -5   7  467.36   40.91
  -7  -5   8    9.33    5.27
  -7  -5   9  621.49   45.80
  -7  -5  10    6.95    4.77
  -7  -4  -3  -12.65    6.57
  -7  -4  -2 1096.64   62.87
  -7  -4  -1  122.83   18.56
  -7  -4   0  634.39   45.93
  -7  -4   0  833.30   52.43
  -7  -4   1  193.28   24.66
  -7  -4   2  855.84   56.85
  -7  -4   3  346.56   34.67
  -7  -4   4  321.47   34.12
  -7  -4   5  818.56   57.28
  -7  -4   6  415.84   39.18
  -7  -4   7  610.89   48.48
  -7  -4   8   54.72   13.58
  -7  -4   9  480.92   40.71
  -7  -4  10   11.72    6.25
  -7  -4  11  490.04   38.23
  -7  -4  11  492.92   35.29
  -7  -4  12    8.23    5.02
  -7  -4  12   -0.42    3.22
  -7  -4  13  488.52   29.78
  -7  -3  -5  357.88   33.22
  -7  -3  -4  663.30   46.91
  -7  -3  -3    9.68    7.39
  -7  -3  -2 1088.40   62.23
  -7  -3  -1    7.79    4.60
  -7  -3  -1   13.77    7.62
  -7  -3   0 1020.93   59.56
  -7  -3   0 1051.78   63.17
  -7  -3   1  181.60   23.89
  -7  -3   2  576.31   45.66
  -7  -3   3  169.55   23.98
  -7  -3   4  486.83   42.24
  -7  -3   5  416.38   39.36
  -7  -3   6  709.88   52.72
  -7  -3   7  415.86   39.14
  -7  -3   8  295.68   32.12
  -7  -3   9  484.44   41.52
  -7  -3  10   25.27    8.09
  -7  -3  11  320.37   31.57
  -7  -3  11  364.76   31.29
  -7  -3  12   16.16    6.84
  -7  -3  12    1.55    3.42
  -7  -3  13  440.78   30.36
  -7  -3  13  353.37   29.89
  -7  -3  14   14.61    5.32
  -7  -2  -5  268.03   29.03
  -7  -2  -4  613.53   45.11
  -7  -2  -3  110.54   17.49
  -7  -2  -2  700.92   48.30
  -7  -2  -2  756.41   50.80
  -7  -2  -1    3.16    4.45
  -7  -2  -1   -2.07    4.15
  -7  -2   0  750.89   49.66
  -7  -2   0  788.40   53.32
  -7  -2   1  157.85   20.92
  -7  -2   1  151.20   22.53
  -7  -2   2  812.11   55.97
  -7  -2   3   21.39    8.89
  -7  -2   4  169.84   24.23
  -7  -2   5   56.66   13.81
  -7  -2   6  702.51   52.72
  -7  -2   7  190.57   26.47
  -7  -2   8  262.43   30.21
  -7  -2   9  380.28   36.53
  -7  -2  10  138.78   20.98
  -7  -2  11  455.30   36.33
  -7  -2  11  369.58   34.51
  -7  -2  12   73.83   13.53
  -7  -2  12   69.05   14.10
  -7  -2  13  477.13   36.35
  -7  -2  13  518.64   35.72
  -7  -2  14    6.47    4.71
  -7  -2  14   12.28    5.43
  -7  -1  -4  689.36   49.32
  -7  -1  -3  273.86   29.54
  -7  -1  -3  316.08   31.51
  -7  -1  -2  887.16   56.86
  -7  -1  -2  970.43   60.26
  -7  -1  -1   69.28   13.90
  -7  -1  -1   91.74   16.79
  -7  -1   0 1218.35   67.23
  -7  -1   0 1133.59   68.21
  -7  -1   1   31.78    9.76
  -7  -1   1   28.90    9.37
  -7  -1   2  657.76   50.00
  -7  -1   3   18.66    8.89
  -7  -1   4  260.65   30.62
  -7  -1   5  106.09   19.73
  -7  -1   6  437.05   40.40
  -7  -1   7  274.56   31.88
  -7  -1   8  183.85   25.60
  -7  -1   9  294.28   32.10
  -7  -1  10  171.59   23.71
  -7  -1  11  312.84   31.38
  -7  -1  11  343.18   31.26
  -7  -1  12  109.18   16.57
  -7  -1  12  130.38   19.14
  -7  -1  13  444.63   33.73
  -7  -1  13  460.63   35.42
  -7  -1  14   11.24    5.07
  -7  -1  14   13.02    6.20
  -7  -1  15  283.36   22.26
  -7  -1  15  238.89   20.37
  -7   0  -4  316.26   32.68
  -7   0  -3  267.63   30.13
  -7   0  -2  659.62   48.49
  -7   0  -2  608.55   47.55
  -7   0  -1  498.54   41.23
  -7   0  -1  484.41   41.88
  -7   0   0  724.33   50.54
  -7   0   0  660.91   50.40
  -7   0   1    4.87    3.75
  -7   0   1    2.16    6.04
  -7   0   2  596.41   47.31
  -7   0   3   -2.43    4.75
  -7   0   4  108.66   19.03
  -7   0   5    3.43    3.89
  -7   0   6  709.67   53.01
  -7   0   7  122.68   20.68
  -7   0   8  378.91   36.94
  -7   0   9  174.68   23.99
  -7   0  10  187.50   25.37
  -7   0  11  274.47   29.17
  -7   0  11  251.78   26.26
  -7   0  12  157.24   20.41
  -7   0  12  172.45   21.52
  -7   0  13  325.69   29.35
  -7   0  13  294.73   26.70
  -7   0  14   55.49   10.98
  -7   0  14   60.73   11.62
  -7   0  15  187.09   17.74
  -7   0  15  167.07   16.98
  -7   1  -5  460.42   41.19
  -7   1  -4  182.99   25.57
  -7   1  -3  114.52   19.78
  -7   1  -2  308.34   33.82
  -7   1  -1  409.06   39.16
  -7   1   0  489.44   43.28
  -7   1   1    2.17    4.29
  -7   1   2  404.87   39.22
  -7   1   3  100.08   19.31
  -7   1   4  494.99   44.30
  -7   1   5  191.59   26.86
  -7   1   6  733.68   54.49
  -7   1   7   93.25   18.38
  -7   1   8  757.80   55.33
  -7   1   9  206.03   26.59
  -7   1  10  471.15   40.48
  -7   1  11  114.61   18.68
  -7   1  11  127.30   17.99
  -7   1  12  210.87   23.08
  -7   1  12  196.11   23.29
  -7   1  13  225.65   23.37
  -7   1  13  180.54   20.63
  -7   1  14   92.21   13.74
  -7   1  14   98.05   13.88
  -7   1  15  171.90   17.29
  -7   2  -7  537.04   44.01
  -7   2  -6  113.49   20.13
  -7   2  -5  686.96   53.05
  -7   2  -4    6.24    3.82
  -7   2  -3  194.77   27.50
  -7   2  -2  321.15   35.80
  -7   2  -1  226.20   29.71
  -7   2   0  429.98   41.75
  -7   2   1   17.38    8.69
  -7   2   2  285.19   33.70
  -7   2   3  196.74   27.52
  -7   2   4  476.89   44.31
  -7   2   5  222.89   29.51
  -7   2   6  966.89   65.17
  -7   2   7   64.20   14.94
  -7   2   8  558.57   46.36
  -7   2   9  218.53   27.58
  -7   2  10  616.35   46.77
  -7   2  11   93.98   16.59
  -7   2  11  102.41   16.00
  -7   2  12  320.36   27.88
  -7   2  12  320.72   29.59
  -7   2  13  148.57   17.97
  -7   2  13  142.37   17.65
  -7   2  14  135.28   15.61
  -7   2  14  155.44   17.52
  -7   3  -8   85.84   16.06
  -7   3  -7  497.16   41.89
  -7   3  -6   -0.49    9.34
  -7   3  -5  702.98   54.04
  -7   3  -4   14.35    8.46
  -7   3  -3  400.03   40.97
  -7   3  -2  174.42   26.92
  -7   3  -1  232.66   31.12
  -7   3   0  374.49   39.74
  -7   3   1   23.88   10.90
  -7   3   2  415.51   42.12
  -7   3   3  196.52   28.33
  -7   3   4  492.02   45.65
  -7   3   5   -5.85    8.21
  -7   3   6  654.70   52.88
  -7   3   7   30.92   11.83
  -7   3   8  500.03   43.53
  -7   3   9   36.68   11.18
  -7   3  10  388.30   35.12
  -7   3  11   46.83   11.25
  -7   3  12  302.78   26.05
  -7   3  12  296.47   26.96
  -7   3  13   73.37   11.63
  -7   3  13   84.45   12.36
  -7   4  -8  132.97   17.68
  -7   4  -7  384.87   34.08
  -7   4  -6    0.91    5.95
  -7   4  -5  572.27   46.71
  -7   4  -4    7.18    6.24
  -7   4  -3  350.94   37.38
  -7   4  -2  233.60   30.23
  -7   4  -1  403.94   41.52
  -7   4   0  161.91   26.07
  -7   4   1  193.15   28.41
  -7   4   2  353.02   38.77
  -7   4   3  273.90   33.82
  -7   4   4  279.51   33.70
  -7   4   5  109.99   20.35
  -7   4   6  362.39   37.68
  -7   4   7   55.15   13.73
  -7   4   8  492.97   42.24
  -7   4   9    2.69    3.06
  -7   4  10  376.93   32.83
  -7   4  11   13.23    6.40
  -7   4  12  165.80   17.78
  -7   5  -8  140.30   15.51
  -7   5  -7  200.54   21.12
  -7   5  -6    3.81    3.16
  -7   5  -5  280.60   28.69
  -7   5  -4  -13.92    6.98
  -7   5  -3  329.74   33.43
  -7   5  -2   17.93    8.48
  -7   5  -1  482.70   43.09
  -7   5   0   53.13   13.88
  -7   5   1  290.84   33.23
  -7   5   2  215.84   28.76
  -7   5   3  268.23   31.91
  -7   5   4  111.15   20.23
  -7   5   5  161.49   23.77
  -7   5   6  170.49   24.12
  -7   5   7  197.36   24.77
  -7   5   8  243.72   26.64
  -7   5   9   17.43    6.93
  -7   5  10  200.76   20.75
  -7   5  11   -4.24    3.60
  -7   6  -6   21.73    6.18
  -7   6  -5  217.23   20.96
  -7   6  -4   20.82    6.98
  -7   6  -3  191.96   21.93
  -7   6  -2    2.05    3.12
  -7   6  -1  250.07   26.67
  -7   6   0    8.75    3.87
  -7   6   1  265.40   28.28
  -7   6   2   85.46   16.16
  -7   6   3  214.21   25.10
  -7   6   4   70.01   14.45
  -7   6   5  138.32   19.21
  -7   6   6  156.21   20.05
  -7   6   7  154.30   18.71
  -7   6   8  181.60   19.25
  -7   6   9   13.77    4.60
  -7   7  -3  232.60   19.24
  -7   7  -2    9.40    4.43
  -7   7  -1  310.37   24.82
  -7   7   0   -2.80    4.57
  -7   7   1  178.35   19.01
  -7   7   2   49.30   10.06
  -7   7   3  153.41   17.30
  -7   7   4   40.48    8.82
  -7   7   5   88.31   12.21
  -6 -12  -6   67.68    8.43
  -6 -12  -5  258.60   17.90
  -6 -12  -4   82.18    9.57
  -6 -12  -3  200.28   15.48
  -6 -12  -2  246.08   17.03
  -6 -11   0  137.25   15.02
  -6 -11   1   95.39   11.70
  -6 -11   2  193.34   16.01
  -6 -11   3   56.28    7.44
  -6 -10   2  337.41   26.34
  -6 -10   3  100.05   12.98
  -6 -10   4  306.25   21.98
  -6 -10   5   20.70    4.41
  -6  -9   4  528.90   34.86
  -6  -9   5   85.77   11.95
  -6  -9   6  241.69   18.93
  -6  -8   6  145.94   16.46
  -6  -8   9   20.74    5.30
  -6  -7  12  189.48   15.30
  -6  -6   2   68.24   14.16
  -6  -6   3  892.03   58.06
  -6  -6   4  129.69   20.83
  -6  -6   5  507.52   43.85
  -6  -6   6  384.21   38.02
  -6  -6   6  440.85   38.55
  -6  -6   7  542.85   43.01
  -6  -6   7  462.09   42.59
  -6  -6   8  242.69   27.91
  -6  -6   8  230.16   28.63
  -6  -6   9  176.84   23.24
  -6  -6  10  619.51   44.09
  -6  -6  11   87.10   14.79
  -6  -6  14  216.28   15.85
  -6  -5  -9  649.68   45.81
  -6  -5  -8  308.82   29.91
  -6  -5  -7   69.11   13.77
  -6  -5  -6  429.20   35.40
  -6  -5  -5  560.54   40.65
  -6  -5  -1 1022.25   57.12
  -6  -5   0   11.91    5.32
  -6  -5   1 1193.50   65.08
  -6  -5   1 1067.30   59.10
  -6  -5   2   14.35    4.49
  -6  -5   3 1565.42   82.15
  -6  -5   4  112.71   19.65
  -6  -5   5  534.55   45.13
  -6  -5   6  265.48   31.39
  -6  -5   7  372.16   37.65
  -6  -5   7  376.73   37.02
  -6  -5   8  176.31   24.21
  -6  -5   8  151.26   23.66
  -6  -5   9  190.82   26.65
  -6  -5   9  236.64   28.44
  -6  -5  10  337.63   34.26
  -6  -5  10  322.74   34.02
  -6  -5  11   92.92   17.50
  -6  -5  11  101.64   17.87
  -6  -5  12  693.46   46.70
  -6  -5  13   27.10    8.26
  -6  -5  14  403.14   28.87
  -6  -5  15   42.81    7.29
  -6  -4 -10  564.19   41.71
  -6  -4  -9   58.78   13.37
  -6  -4  -8 1037.58   59.96
  -6  -4  -7   19.92    6.74
  -6  -4  -6  901.29   53.79
  -6  -4  -5  767.37   48.14
  -6  -4  -4 1119.37   60.28
  -6  -4  -3  822.99   49.34
  -6  -4  -2    7.32    4.39
  -6  -4  -1  978.68   54.05
  -6  -4   0  191.47   23.10
  -6  -4   0  168.48   20.03
  -6  -4   1  890.38   53.42
  -6  -4   1  647.88   42.85
  -6  -4   2   22.27    8.28
  -6  -4   3 1768.28   88.68
  -6  -4   4   67.57   14.40
  -6  -4   5 1034.01   65.51
  -6  -4   5 1064.41   61.38
  -6  -4   6  163.48   24.01
  -6  -4   7  286.58   32.68
  -6  -4   7  282.41   31.82
  -6  -4   8   55.12   15.65
  -6  -4   8   62.46   15.67
  -6  -4   9  443.80   41.22
  -6  -4   9  400.54   39.42
  -6  -4  10  357.83   36.55
  -6  -4  10  336.78   35.89
  -6  -4  11  146.70   22.38
  -6  -4  11  191.65   25.35
  -6  -4  12  353.91   34.22
  -6  -4  12  329.28   33.47
  -6  -4  13  149.48   20.35
  -6  -4  14  294.08   26.97
  -6  -4  15  118.30   15.15
  -6  -4  16  226.04   16.88
  -6  -3 -10  418.94   34.88
  -6  -3  -9  177.42   21.92
  -6  -3  -8 1042.53   59.24
  -6  -3  -7   -2.83    4.40
  -6  -3  -6  841.11   50.94
  -6  -3  -5  488.63   36.46
  -6  -3  -4  364.54   30.90
  -6  -3  -3  625.67   41.33
  -6  -3  -2  258.88   24.66
  -6  -3  -1 1425.29   68.51
  -6  -3   0  304.04   29.71
  -6  -3   0  348.23   28.44
  -6  -3   1  659.85   45.46
  -6  -3   1  473.02   34.60
  -6  -3   2   66.22   14.40
  -6  -3   2   43.67    9.53
  -6  -3   2   59.83   11.08
  -6  -3   3 1647.98   84.50
  -6  -3   3 1648.45   76.56
  -6  -3   4   22.96    8.81
  -6  -3   4    7.51    4.38
  -6  -3   5  784.24   54.86
  -6  -3   5  786.09   50.10
  -6  -3   6   84.23   17.13
  -6  -3   6   73.84   14.67
  -6  -3   7  618.20   47.81
  -6  -3   7  617.19   48.95
  -6  -3   8   62.69   15.34
  -6  -3   8   69.18   16.37
  -6  -3   9  543.15   46.09
  -6  -3   9  462.10   42.18
  -6  -3  10  277.72   32.30
  -6  -3  10  330.02   34.95
  -6  -3  11  247.39   29.76
  -6  -3  11  274.02   31.26
  -6  -3  12  435.56   39.30
  -6  -3  12  441.24   39.51
  -6  -3  13  137.47   20.66
  -6  -3  13   86.68   16.23
  -6  -3  14  197.83   23.42
  -6  -3  14  203.30   23.56
  -6  -3  15   81.19   13.45
  -6  -3  16  214.50   18.33
  -6  -3  16  231.04   20.78
  -6  -2 -10  505.14   38.97
  -6  -2  -9  -11.12    6.12
  -6  -2  -8  838.96   51.78
  -6  -2  -7   90.03   15.13
  -6  -2  -6  524.30   38.46
  -6  -2  -5  209.57   22.74
  -6  -2  -4  971.99   54.61
  -6  -2  -3  809.15   48.18
  -6  -2  -2  217.02   22.59
  -6  -2  -1 1950.94   84.94
  -6  -2  -1 1953.95   90.84
  -6  -2   0  758.74   41.95
  -6  -2   0  655.16   42.05
  -6  -2   0  708.58   48.00
  -6  -2   1  408.59   30.82
  -6  -2   1  423.11   30.78
  -6  -2   1  377.96   34.57
  -6  -2   2   88.55   13.68
  -6  -2   2  135.15   17.16
  -6  -2   2  112.91   18.09
  -6  -2   3 1574.20   73.93
  -6  -2   3 1542.64   81.11
  -6  -2   4   53.56   11.03
  -6  -2   4   60.42   14.48
  -6  -2   5  485.98   37.36
  -6  -2   5  467.17   40.69
  -6  -2   6  124.12   18.25
  -6  -2   6   86.53   17.38
  -6  -2   7  182.22   23.11
  -6  -2   7  187.93   25.87
  -6  -2   7  158.52   22.40
  -6  -2   8   -3.95    5.08
  -6  -2   8    0.29    5.28
  -6  -2   9  529.92   44.66
  -6  -2   9  557.67   46.86
  -6  -2  10  176.90   25.82
  -6  -2  10  209.34   27.09
  -6  -2  11  526.05   44.04
  -6  -2  11  487.61   43.15
  -6  -2  12  374.19   36.30
  -6  -2  12  398.20   37.81
  -6  -2  13  309.55   31.94
  -6  -2  13  298.37   31.41
  -6  -2  14  360.51   33.35
  -6  -2  14  357.80   32.52
  -6  -2  15  108.34   16.39
  -6  -2  15  135.52   18.58
  -6  -2  16  338.05   27.69
  -6  -2  17   40.01    8.17
  -6  -1 -10 1021.39   60.17
  -6  -1  -9  112.37   17.74
  -6  -1  -8 1141.19   63.25
  -6  -1  -7   -4.48    5.28
  -6  -1  -6  786.10   49.32
  -6  -1  -5  113.50   16.78
  -6  -1  -4 1652.13   77.93
  -6  -1  -3  369.61   30.70
  -6  -1  -2  968.30   53.89
  -6  -1  -2  983.48   57.95
  -6  -1  -1  838.22   44.95
  -6  -1  -1  882.27   49.66
  -6  -1  -1  785.22   51.77
  -6  -1   0  556.48   35.77
  -6  -1   0  563.39   37.83
  -6  -1   0  544.03   41.82
  -6  -1   1  426.48   31.15
  -6  -1   1  440.41   32.39
  -6  -1   1  378.87   34.74
  -6  -1   2  446.74   32.25
  -6  -1   2  422.92   36.41
  -6  -1   3 1604.39   71.90
  -6  -1   3 1613.01   79.97
  -6  -1   4   92.07   15.10
  -6  -1   4   96.50   17.60
  -6  -1   5  214.66   23.90
  -6  -1   5  226.34   27.64
  -6  -1   6    8.91    6.42
  -6  -1   6   -0.28    3.09
  -6  -1   7  262.91   27.98
  -6  -1   7  270.19   30.72
  -6  -1   8  189.96   26.22
  -6  -1   8  205.06   25.42
  -6  -1   9  927.13   62.60
  -6  -1   9 1010.47   62.29
  -6  -1  10    2.61    3.82
  -6  -1  10   -1.44    5.98
  -6  -1  11  649.83   49.27
  -6  -1  11  674.66   51.10
  -6  -1  12  191.86   26.02
  -6  -1  12  183.91   24.54
  -6  -1  13  328.25   32.64
  -6  -1  13  304.00   31.65
  -6  -1  14  218.81   25.65
  -6  -1  14  240.99   26.50
  -6  -1  15  236.37   25.38
  -6  -1  15  250.31   25.31
  -6  -1  16  263.70   25.16
  -6  -1  17  112.63   14.39
  -6   0  -9    7.52    6.35
  -6   0  -8 1505.04   78.21
  -6   0  -7    0.89    4.27
  -6   0  -6  618.99   44.13
  -6   0  -5    4.13    3.82
  -6   0  -4 1272.94   66.30
  -6   0  -4 1198.42   67.26
  -6   0  -3   96.06   15.38
  -6   0  -3   85.25   15.53
  -6   0  -2  569.62   40.03
  -6   0  -2  546.97   42.12
  -6   0  -1  193.16   21.64
  -6   0  -1  162.86   21.98
  -6   0   0 1047.66   55.92
  -6   0   0  934.11   50.61
  -6   0   0  914.98   57.84
  -6   0   1  153.80   18.23
  -6   0   1  185.23   21.15
  -6   0   1  199.30   24.16
  -6   0   2  215.05   23.05
  -6   0   2  259.81   24.39
  -6   0   2  297.55   30.52
  -6   0   3  848.30   48.65
  -6   0   3  843.98   54.60
  -6   0   4   45.82   10.36
  -6   0   4   47.69   12.06
  -6   0   5  395.14   33.51
  -6   0   5  410.52   37.90
  -6   0   6  100.92   16.61
  -6   0   6   83.62   16.69
  -6   0   7  582.40   43.55
  -6   0   7  602.22   47.74
  -6   0   8  430.80   40.00
  -6   0   8  449.49   37.70
  -6   0   9 1159.76   70.89
  -6   0   9 1115.29   65.49
  -6   0  10    4.09    4.32
  -6   0  10    4.64    4.97
  -6   0  11  925.85   61.49
  -6   0  11  923.71   59.12
  -6   0  12   18.16    7.27
  -6   0  12   35.89   11.70
  -6   0  13  274.81   30.01
  -6   0  13  352.50   33.82
  -6   0  14  145.01   20.76
  -6   0  14  159.37   21.44
  -6   0  15  236.79   25.42
  -6   0  15  246.76   25.04
  -6   0  16  195.02   21.53
  -6   0  16  184.36   19.45
  -6   0  17  110.52   14.95
  -6   1  -7   82.20   15.77
  -6   1  -6  460.70   38.96
  -6   1  -6  461.94   40.15
  -6   1  -5    4.58    6.24
  -6   1  -5    4.48    5.30
  -6   1  -4 1369.72   71.45
  -6   1  -4 1226.35   71.62
  -6   1  -3   63.17   13.76
  -6   1  -3   81.01   16.42
  -6   1  -2 1060.36   59.99
  -6   1  -2  944.41   60.75
  -6   1  -1   53.22   11.00
  -6   1  -1   22.06    8.84
  -6   1   0  864.82   52.74
  -6   1   0  823.55   55.27
  -6   1   1   68.17   13.42
  -6   1   1   51.00   11.71
  -6   1   2  729.43   46.93
  -6   1   2  658.24   43.08
  -6   1   2  657.87   48.95
  -6   1   3  476.65   35.51
  -6   1   3  373.72   33.03
  -6   1   3  478.79   40.27
  -6   1   4  255.25   26.25
  -6   1   4  287.42   31.18
  -6   1   5  145.78   19.59
  -6   1   5  189.11   25.63
  -6   1   6   14.99    7.27
  -6   1   6   -0.14    5.15
  -6   1   7 1400.47   79.87
  -6   1   8   19.27    6.64
  -6   1   8   30.32    8.66
  -6   1   9 1114.28   64.24
  -6   1   9 1064.64   68.17
  -6   1  10    9.63    6.07
  -6   1  10    1.54    3.42
  -6   1  11  609.91   45.71
  -6   1  11  630.66   49.01
  -6   1  12    4.62    4.82
  -6   1  12    7.92    3.90
  -6   1  13  430.08   37.38
  -6   1  13  445.16   37.35
  -6   1  14   69.56   13.68
  -6   1  14   47.22   11.11
  -6   1  15  218.29   24.11
  -6   1  15  226.39   23.21
  -6   1  16   96.27   15.23
  -6   1  17   99.80   14.34
  -6   2  -7  197.16   27.05
  -6   2  -6  277.06   32.50
  -6   2  -5  318.82   33.28
  -6   2  -5  363.50   37.34
  -6   2  -4  906.52   58.84
  -6   2  -4  850.67   60.22
  -6   2  -3   91.93   17.50
  -6   2  -3   79.40   17.34
  -6   2  -2  687.88   48.84
  -6   2  -2  591.01   48.76
  -6   2  -1   65.20   14.17
  -6   2  -1   76.85   16.60
  -6   2   0 1299.05   70.72
  -6   2   0 1191.46   72.61
  -6   2   1   48.41   12.14
  -6   2   1    6.98    7.99
  -6   2   2  300.69   30.29
  -6   2   2  273.91   31.14
  -6   2   3  168.22   22.64
  -6   2   3  144.33   22.70
  -6   2   4  272.73   27.88
  -6   2   4  251.38   30.11
  -6   2   5  300.20   29.97
  -6   2   5  303.25   33.69
  -6   2   6    6.41    7.55
  -6   2   7  586.46   48.86
  -6   2   8   -1.40    5.29
  -6   2   8   10.93    4.59
  -6   2   9  952.11   62.67
  -6   2   9  836.64   54.63
  -6   2  10   44.68   13.70
  -6   2  10   51.70   12.39
  -6   2  11  677.67   50.44
  -6   2  11  635.93   46.63
  -6   2  12   -6.28    5.23
  -6   2  12  -10.18    6.06
  -6   2  13  511.10   39.81
  -6   2  13  424.40   36.54
  -6   2  14   83.77   14.33
  -6   2  14   58.84   12.66
  -6   2  15  395.21   32.98
  -6   2  16   22.05    6.61
  -6   2  17  281.28   24.12
  -6   3  -9  186.58   25.44
  -6   3  -8  327.66   35.82
  -6   3  -7  223.70   30.12
  -6   3  -6  296.60   35.10
  -6   3  -5   64.93   16.60
  -6   3  -4  765.95   59.69
  -6   3  -3   23.00   10.31
  -6   3  -2  304.83   33.21
  -6   3  -2  277.04   33.79
  -6   3  -1  176.90   24.59
  -6   3  -1  126.73   22.53
  -6   3   0  763.78   54.66
  -6   3   0  799.50   59.53
  -6   3   1    7.92    6.26
  -6   3   1    2.52    3.77
  -6   3   2  530.18   44.07
  -6   3   2  539.63   47.16
  -6   3   3  250.18   29.14
  -6   3   3  280.35   33.43
  -6   3   4  542.77   47.84
  -6   3   5  421.91   41.54
  -6   3   6  289.93   34.03
  -6   3   7  566.24   48.38
  -6   3   7  590.27   42.96
  -6   3   8  154.19   23.75
  -6   3   8  206.69   24.70
  -6   3   9  336.05   35.84
  -6   3   9  357.65   33.24
  -6   3  10  181.57   25.29
  -6   3  10  163.55   22.01
  -6   3  11  533.28   43.56
  -6   3  11  528.11   41.46
  -6   3  12    9.12    5.53
  -6   3  12    7.50    4.57
  -6   3  13  431.55   35.48
  -6   3  13  321.27   30.22
  -6   3  14   -3.16    4.31
  -6   3  15  428.12   33.53
  -6   3  16    3.90    4.06
  -6   3  17  273.82   22.88
  -6   4 -10   22.86    8.24
  -6   4  -9  303.79   31.77
  -6   4  -8  131.09   22.30
  -6   4  -7  297.05   34.58
  -6   4  -6  259.65   33.13
  -6   4  -5  123.60   22.48
  -6   4  -4  666.25   56.05
  -6   4  -3   46.16   13.57
  -6   4  -2  405.57   43.24
  -6   4  -1   45.44   14.27
  -6   4   0  637.93   55.02
  -6   4   1   14.92    9.63
  -6   4   2  287.24   35.51
  -6   4   3   74.19   17.52
  -6   4   4  716.60   57.85
  -6   4   5  134.08   24.00
  -6   4   6  502.61   46.70
  -6   4   7  131.48   23.36
  -6   4   7  154.98   21.07
  -6   4   8  377.98   39.08
  -6   4   8  429.53   36.20
  -6   4   9  178.94   25.62
  -6   4   9  201.91   24.38
  -6   4  10  257.46   30.06
  -6   4  10  290.58   29.61
  -6   4  11  368.37   33.18
  -6   4  11  361.70   34.09
  -6   4  12   20.94    7.00
  -6   4  12   59.30   12.83
  -6   4  13  191.70   22.62
  -6   4  14    2.14    2.83
  -6   4  15  326.63   27.38
  -6   4  16    4.80    4.32
  -6   5 -10   41.18    9.32
  -6   5  -9  271.57   27.25
  -6   5  -8   19.76    7.52
  -6   5  -7  306.34   32.60
  -6   5  -6  104.52   20.27
  -6   5  -5  184.54   27.06
  -6   5  -4  382.27   40.42
  -6   5  -3  237.44   31.59
  -6   5  -2  348.60   39.33
  -6   5  -1   11.00    8.22
  -6   5   0  637.46   55.32
  -6   5   1    3.07    4.57
  -6   5   2  385.68   41.80
  -6   5   3   86.52   19.54
  -6   5   4  584.30   51.91
  -6   5   5   52.28   14.95
  -6   5   6  292.12   34.55
  -6   5   7   94.68   19.43
  -6   5   7  102.98   17.11
  -6   5   8  285.33   32.91
  -6   5   8  305.63   29.59
  -6   5   9   84.66   15.31
  -6   5   9   56.83   14.23
  -6   5  10  261.94   28.56
  -6   5  10  288.36   28.58
  -6   5  11  247.62   26.26
  -6   5  11  287.92   27.80
  -6   5  12  129.35   18.40
  -6   5  13  162.26   19.43
  -6   5  14   20.79    5.95
  -6   5  15  214.11   20.12
  -6   6  -9  208.67   19.98
  -6   6  -8   28.17    7.93
  -6   6  -7  312.04   29.30
  -6   6  -6   47.26   11.72
  -6   6  -5  225.31   27.00
  -6   6  -4  152.54   22.78
  -6   6  -3  247.52   30.36
  -6   6  -2  297.15   34.29
  -6   6  -1   66.87   16.43
  -6   6   0  536.78   48.24
  -6   6   1   18.69    8.60
  -6   6   2  383.13   40.36
  -6   6   3   -2.65    4.94
  -6   6   4  574.63   49.23
  -6   6   5   10.79    7.55
  -6   6   6  370.17   37.56
  -6   6   7    4.04    5.48
  -6   6   8  339.98   33.12
  -6   6   8  299.93   27.80
  -6   6   9   39.99   10.43
  -6   6   9   19.99    7.19
  -6   6  10  290.31   26.35
  -6   6  10  291.06   26.75
  -6   6  11  208.44   21.92
  -6   6  12  183.35   19.69
  -6   6  13  153.24   16.80
  -6   6  14    6.62    3.75
  -6   7  -7  186.77   18.37
  -6   7  -6   54.70   10.72
  -6   7  -5   91.22   14.55
  -6   7  -4  163.93   20.82
  -6   7  -3  302.44   29.43
  -6   7  -2  152.94   21.33
  -6   7  -1   84.14   16.05
  -6   7   0  248.77   28.52
  -6   7   1   55.14   13.86
  -6   7   2  347.53   34.12
  -6   7   3   -2.37    4.06
  -6   7   4  411.90   36.93
  -6   7   5    6.80    5.54
  -6   7   6  351.27   32.19
  -6   7   7    1.59    2.93
  -6   7   8  331.48   27.95
  -6   7   9   -2.19    5.38
  -6   7  10  172.40   16.85
  -6   7  11  152.01   15.52
  -6   8  -4  146.96   15.25
  -6   8  -3  269.29   22.47
  -6   8  -2  114.87   15.01
  -6   8  -1  244.89   22.86
  -6   8   0   47.84   10.39
  -6   8   1   51.68   10.75
  -6   8   2  118.31   15.89
  -6   8   3   25.54    7.13
  -6   8   4  239.06   22.34
  -6   8   5   24.32    6.46
  -6   8   6  163.23   16.68
  -5 -12  -8  235.19   16.15
  -5 -12  -7   24.70    5.53
  -5 -12  -6  260.79   19.01
  -5 -12  -5   -7.38    3.65
  -5 -12  -4  447.98   27.15
  -5 -12  -3    6.19    3.75
  -5 -12  -2  318.42   22.05
  -5 -12  -1    8.14    4.33
  -5 -12   0  516.77   28.31
  -5 -12   1  129.43   12.01
  -5 -11   0  383.37   28.84
  -5 -11   1   27.25    6.69
  -5 -11   2  253.15   20.95
  -5 -11   3  132.24   13.84
  -5 -11   4  213.87   17.11
  -5 -11   5  133.55   11.89
  -5 -10   3   25.13    8.23
  -5 -10   4  422.45   30.05
  -5 -10   5  282.85   22.45
  -5 -10   6  138.42   14.08
  -5 -10   7  275.56   18.46
  -5  -9   5   31.89    8.30
  -5  -9   6  192.55   19.65
  -5  -9   7  240.52   20.53
  -5  -9   8  129.43   13.10
  -5  -8   6  260.56   25.43
  -5  -8   7   84.86   13.15
  -5  -8   8  319.35   24.74
  -5  -8   9  192.41   18.16
  -5  -8  10  104.16   12.42
  -5  -8  11  169.46   14.44
  -5  -7   6  864.09   57.99
  -5  -7   7  299.51   32.42
  -5  -7   7  284.30   26.76
  -5  -7   8 1009.52   63.85
  -5  -7  12  101.85   12.92
  -5  -7  13  167.74   15.37
  -5  -6   1  176.50   21.43
  -5  -6   2  680.35   47.02
  -5  -6   3    3.94    5.51
  -5  -6   4 1268.86   72.62
  -5  -6   4 1315.43   72.46
  -5  -6   5    2.66    3.34
  -5  -6   5   -3.59    5.21
  -5  -6   6  980.06   64.77
  -5  -6   6 1016.63   64.58
  -5  -6   7   47.83   13.58
  -5  -6   7   52.50   14.32
  -5  -6   8 1004.61   66.41
  -5  -6   8  978.98   65.64
  -5  -6   9  193.97   27.43
  -5  -6  10  389.10   38.52
  -5  -6  11   57.50   14.27
  -5  -6  12  523.51   41.74
  -5  -6  13   76.68   14.16
  -5  -6  14   61.48   10.40
  -5  -6  15  210.69   16.63
  -5  -5 -12   99.33   15.62
  -5  -5 -11 1164.78   62.35
  -5  -5   2 1450.26   73.52
  -5  -5   3  117.86   18.15
  -5  -5   3  108.48   15.75
  -5  -5   4  961.88   58.98
  -5  -5   4  953.24   58.17
  -5  -5   4  852.50   51.49
  -5  -5   5   78.35   16.35
  -5  -5   5   80.59   16.04
  -5  -5   5  110.16   17.65
  -5  -5   6  977.67   63.53
  -5  -5   6 1007.53   64.28
  -5  -5   6 1028.31   61.12
  -5  -5   7   39.62   13.49
  -5  -5   7   39.74   12.56
  -5  -5   7   41.38   11.26
  -5  -5   8  916.00   63.86
  -5  -5   8 1036.08   67.81
  -5  -5   9   30.04   11.36
  -5  -5   9   32.52   10.96
  -5  -5  10  445.01   42.34
  -5  -5  10  443.43   43.00
  -5  -5  11  104.59   20.33
  -5  -5  11  116.70   20.55
  -5  -5  12  858.27   59.42
  -5  -5  13   33.60   12.13
  -5  -5  14  364.30   32.74
  -5  -5  15  135.52   15.92
  -5  -5  15  151.30   18.55
  -5  -5  16   17.82    6.17
  -5  -5  16   17.77    5.18
  -5  -4 -12  329.71   28.90
  -5  -4 -11  830.48   49.22
  -5  -4 -10  307.93   27.30
  -5  -4  -9 1117.65   58.55
  -5  -4   1 1255.77   55.90
  -5  -4   2  878.57   45.81
  -5  -4   3  341.52   30.93
  -5  -4   3  366.82   27.99
  -5  -4   4 1146.57   65.04
  -5  -4   4 1187.30   59.92
  -5  -4   5  768.76   52.57
  -5  -4   5  906.04   56.77
  -5  -4   5  868.67   51.02
  -5  -4   6  637.81   48.23
  -5  -4   6  672.91   49.35
  -5  -4   6  703.18   46.45
  -5  -4   7    1.24    5.80
  -5  -4   7    6.12    6.26
  -5  -4   7    0.93    3.92
  -5  -4   8 1007.52   66.61
  -5  -4   8 1072.03   67.38
  -5  -4   8 1034.01   63.51
  -5  -4   9  252.81   31.44
  -5  -4   9  272.25   32.17
  -5  -4  10  125.36   21.71
  -5  -4  10  129.97   22.81
  -5  -4  11    7.61    7.12
  -5  -4  11   11.10    7.53
  -5  -4  12  589.20   49.44
  -5  -4  12  543.85   46.63
  -5  -4  13   24.88    9.43
  -5  -4  14  372.83   35.93
  -5  -4  15  154.93   21.02
  -5  -4  16  134.47   15.73
  -5  -4  16  178.06   20.23
  -5  -4  17  209.32   17.38
  -5  -4  17  244.64   21.02
  -5  -3 -12  573.24   38.82
  -5  -3 -11  741.50   45.17
  -5  -3 -10  527.51   36.57
  -5  -3  -9  916.04   50.71
  -5  -3  -8  410.01   30.90
  -5  -3  -7 1542.06   70.40
  -5  -3  -6    7.00    4.21
  -5  -3  -5  530.05   34.70
  -5  -3  -4  328.77   25.78
  -5  -3  -3 1152.65   55.37
  -5  -3  -2   26.71    6.64
  -5  -3  -1 1132.19   53.72
  -5  -3   0  878.65   45.08
  -5  -3   0  894.25   42.29
  -5  -3   1 1615.80   62.59
  -5  -3   1 1210.08   58.91
  -5  -3   2  294.58   22.78
  -5  -3   2  212.59   19.35
  -5  -3   3  276.68   22.15
  -5  -3   3  360.47   26.75
  -5  -3   4  547.76   40.74
  -5  -3   4  535.13   35.77
  -5  -3   5 1006.79   59.84
  -5  -3   5  945.81   52.92
  -5  -3   6  615.93   45.18
  -5  -3   6  611.93   45.64
  -5  -3   6  617.68   42.01
  -5  -3   7   26.65    9.33
  -5  -3   7   22.47   10.04
  -5  -3   7   19.59    6.77
  -5  -3   8  394.06   37.74
  -5  -3   8  424.90   39.16
  -5  -3   8  389.49   34.95
  -5  -3   9   22.75    9.97
  -5  -3   9   20.21    8.52
  -5  -3   9    5.17    4.89
  -5  -3  10  138.27   22.71
  -5  -3  10  114.05   20.33
  -5  -3  11    6.51    5.34
  -5  -3  11    3.99    3.94
  -5  -3  12  304.56   35.14
  -5  -3  12  329.58   35.67
  -5  -3  13   43.69   13.01
  -5  -3  13   70.64   17.03
  -5  -3  14  528.28   45.04
  -5  -3  14  550.91   44.27
  -5  -3  15  390.80   36.17
  -5  -3  16  251.36   26.93
  -5  -3  17  208.93   19.15
  -5  -3  17  256.54   24.26
  -5  -3  18  188.03   15.11
  -5  -3  18  200.02   18.58
  -5  -2 -11  600.96   39.68
  -5  -2 -10  757.38   45.17
  -5  -2  -9  712.66   43.08
  -5  -2  -8  534.26   35.88
  -5  -2  -7 1061.94   54.33
  -5  -2  -6  380.28   28.69
  -5  -2  -5 1636.83   71.61
  -5  -2  -4  329.22   25.69
  -5  -2  -3 1372.83   62.02
  -5  -2  -2  111.86   11.81
  -5  -2  -2  108.71   13.60
  -5  -2  -1 1632.45   69.31
  -5  -2  -1 1671.23   65.89
  -5  -2   0  411.68   26.26
  -5  -2   0  396.67   27.17
  -5  -2   1 1957.60   76.73
  -5  -2   1 1850.53   75.77
  -5  -2   2  170.63   16.50
  -5  -2   2  172.05   17.38
  -5  -2   3  220.13   20.40
  -5  -2   3  161.41   16.03
  -5  -2   4 1085.26   55.15
  -5  -2   5 1221.87   66.19
  -5  -2   5 1108.20   58.26
  -5  -2   6  589.97   44.42
  -5  -2   6  591.42   42.76
  -5  -2   6  590.67   40.13
  -5  -2   7   47.32   12.86
  -5  -2   7   38.03   11.62
  -5  -2   7   25.90    8.45
  -5  -2   8  490.29   41.45
  -5  -2   8  501.26   41.61
  -5  -2   8  523.67   39.92
  -5  -2   9   57.01   14.57
  -5  -2   9   52.26   12.70
  -5  -2   9   68.36   14.23
  -5  -2  10  248.09   29.62
  -5  -2  10  221.20   28.14
  -5  -2  10  215.54   26.28
  -5  -2  11  143.27   22.97
  -5  -2  11  172.57   24.97
  -5  -2  12  892.93   62.73
  -5  -2  12  935.89   62.75
  -5  -2  13   16.59    9.22
  -5  -2  13   13.65    9.13
  -5  -2  14  609.29   49.18
  -5  -2  14  670.85   49.98
  -5  -2  15   93.18   16.87
  -5  -2  15   90.56   17.85
  -5  -2  16  548.45   42.36
  -5  -2  17  115.25   15.07
  -5  -2  17  156.70   20.14
  -5  -2  18  202.25   16.92
  -5  -2  18  238.27   22.18
  -5  -1 -11  981.79   54.73
  -5  -1 -10  748.57   45.51
  -5  -1  -9  260.74   24.46
  -5  -1  -8 1052.34   55.01
  -5  -1  -7  734.10   43.08
  -5  -1  -6    2.01    3.22
  -5  -1  -5 1329.28   62.02
  -5  -1  -4  102.15   13.62
  -5  -1  -3  564.13   34.75
  -5  -1  -2  142.75   15.76
  -5  -1  -1  435.16   27.13
  -5  -1  -1  459.88   29.70
  -5  -1   0  103.84   12.97
  -5  -1   0   90.69   11.64
  -5  -1   1 1721.96   69.66
  -5  -1   1 1598.97   68.43
  -5  -1   2   37.30    8.01
  -5  -1   2   22.55    5.95
  -5  -1   3  583.93   35.21
  -5  -1   3  475.75   30.15
  -5  -1   4  688.25   41.18
  -5  -1   4  703.00   37.30
  -5  -1   5 1694.60   76.40
  -5  -1   6  257.89   27.66
  -5  -1   6  241.88   24.22
  -5  -1   7  285.44   29.81
  -5  -1   7  267.15   27.30
  -5  -1   7  282.18   27.27
  -5  -1   8 1107.02   65.41
  -5  -1   8 1016.49   61.06
  -5  -1   8 1040.06   59.67
  -5  -1   9  403.05   36.74
  -5  -1   9  417.47   38.75
  -5  -1   9  477.41   38.37
  -5  -1  10 1137.46   68.08
  -5  -1  10 1043.11   67.08
  -5  -1  10 1209.02   67.55
  -5  -1  11   31.97   10.73
  -5  -1  11   37.91   11.28
  -5  -1  12  891.31   61.05
  -5  -1  12  960.12   62.72
  -5  -1  13   11.29    8.38
  -5  -1  13    7.54    4.76
  -5  -1  14  769.86   55.69
  -5  -1  14  800.21   55.52
  -5  -1  15   -1.59    5.13
  -5  -1  15   13.64    5.99
  -5  -1  16  460.39   36.23
  -5  -1  16  409.04   36.94
  -5  -1  17   38.61    9.63
  -5  -1  18  182.26   16.30
  -5  -1  18  244.67   23.62
  -5  -1  19  112.59   14.18
  -5   0 -10  822.60   50.06
  -5   0  -9  390.16   31.55
  -5   0  -8  441.82   33.32
  -5   0  -7  591.45   38.87
  -5   0  -6  390.11   29.90
  -5   0  -5 1198.66   58.84
  -5   0  -4   25.46    6.71
  -5   0  -3  212.76   20.38
  -5   0  -2  381.78   27.85
  -5   0  -1 1421.45   63.52
  -5   0   0    8.11    4.30
  -5   0   1 2204.82   86.70
  -5   0   2    5.76    3.12
  -5   0   2    1.67    1.97
  -5   0   3  262.56   21.99
  -5   0   3  372.07   26.96
  -5   0   4  573.85   35.72
  -5   0   4  433.62   29.71
  -5   0   5 1224.73   60.84
  -5   0   5 1189.31   66.07
  -5   0   6  164.24   19.36
  -5   0   6  164.23   22.16
  -5   0   7  455.80   35.32
  -5   0   7  446.27   38.49
  -5   0   7  463.77   36.13
  -5   0   8 1124.93   62.47
  -5   0   8 1166.73   67.75
  -5   0   8 1129.10   63.45
  -5   0   9  357.47   32.68
  -5   0   9  367.72   35.53
  -5   0   9  365.01   33.55
  -5   0  10  842.80   54.39
  -5   0  10  811.31   56.79
  -5   0  10  806.67   54.20
  -5   0  11   62.08   14.05
  -5   0  11   47.36   12.63
  -5   0  12  633.64   48.94
  -5   0  12  674.45   50.45
  -5   0  13   12.34    6.36
  -5   0  13   11.99    4.78
  -5   0  14  790.56   55.52
  -5   0  14  815.73   54.89
  -5   0  15    1.84    3.23
  -5   0  15    3.47    4.51
  -5   0  16  780.13   52.13
  -5   0  16  702.65   46.73
  -5   0  17    1.18    4.00
  -5   0  18  163.41   19.76
  -5   0  19    9.79    3.27
  -5   1 -10  826.13   52.96
  -5   1  -9  133.04   19.19
  -5   1  -8  891.76   53.49
  -5   1  -7  691.61   44.90
  -5   1  -6  211.09   22.59
  -5   1  -5  604.23   39.94
  -5   1  -4  494.86   35.02
  -5   1  -3 1362.20   65.45
  -5   1  -2  522.44   35.26
  -5   1  -1 1341.93   63.42
  -5   1   0   31.59    8.23
  -5   1   1 2296.73   92.52
  -5   1   2  144.04   16.94
  -5   1   3   51.87    9.27
  -5   1   4  123.59   15.65
  -5   1   4  166.07   18.34
  -5   1   5  605.24   38.02
  -5   1   5  573.08   38.48
  -5   1   5  614.49   44.49
  -5   1   6  364.89   30.48
  -5   1   6  354.30   33.42
  -5   1   6  375.62   30.84
  -5   1   7  816.44   49.39
  -5   1   7  735.39   47.48
  -5   1   7  792.06   53.40
  -5   1   8  424.43   34.89
  -5   1   8  367.21   35.34
  -5   1   8  346.71   31.56
  -5   1   9  480.53   38.38
  -5   1   9  448.50   40.14
  -5   1   9  438.26   36.77
  -5   1  10  276.57   29.23
  -5   1  10  298.97   32.27
  -5   1  10  282.68   29.54
  -5   1  11   51.85   13.65
  -5   1  11   48.88   12.16
  -5   1  12  463.66   39.79
  -5   1  12  400.07   38.02
  -5   1  13  192.89   25.17
  -5   1  13  165.16   23.35
  -5   1  14  512.03   41.71
  -5   1  14  535.04   43.59
  -5   1  15    1.60    5.18
  -5   1  15   -4.36    6.45
  -5   1  16  690.62   48.43
  -5   1  17    6.27    5.00
  -5   1  18  267.46   25.91
  -5   1  19    2.00    3.74
  -5   2  -9   84.91   16.81
  -5   2  -8  493.30   40.43
  -5   2  -7  168.16   22.17
  -5   2  -6  574.59   42.38
  -5   2  -5  192.23   22.89
  -5   2  -4   95.79   15.85
  -5   2  -4   53.53   12.75
  -5   2  -3  963.46   53.89
  -5   2  -3  788.89   54.74
  -5   2  -2  675.12   43.54
  -5   2  -2  633.56   46.81
  -5   2  -1 1307.00   65.04
  -5   2  -1 1215.89   68.80
  -5   2   0  124.44   16.99
  -5   2   1 1335.97   65.91
  -5   2   1 1302.48   70.68
  -5   2   2    6.95    5.02
  -5   2   2    6.87    3.95
  -5   2   3 1120.20   58.77
  -5   2   3 1103.39   63.80
  -5   2   4  154.33   19.32
  -5   2   4  217.52   25.40
  -5   2   5  508.63   36.15
  -5   2   5  380.85   32.00
  -5   2   5  463.97   38.85
  -5   2   6  287.60   27.29
  -5   2   6  251.38   28.47
  -5   2   6  287.65   26.87
  -5   2   7  791.52   49.30
  -5   2   7  739.51   52.38
  -5   2   7  714.48   46.95
  -5   2   8  460.08   37.35
  -5   2   8  471.40   40.78
  -5   2   8  444.48   36.16
  -5   2   9  692.46   48.20
  -5   2   9  656.72   49.92
  -5   2   9  677.94   47.02
  -5   2  10  107.57   19.03
  -5   2  10   95.99   16.53
  -5   2  11  174.20   24.56
  -5   2  11  247.80   27.81
  -5   2  12  284.22   31.13
  -5   2  12  294.27   30.77
  -5   2  13  353.83   34.48
  -5   2  13  409.15   37.18
  -5   2  14  352.84   34.37
  -5   2  14  381.62   34.32
  -5   2  15   61.00   13.52
  -5   2  16  513.49   40.51
  -5   2  17   19.16    8.04
  -5   2  18  216.60   22.89
  -5   2  19    0.65    3.38
  -5   3  -8  628.40   49.10
  -5   3  -7  190.30   25.60
  -5   3  -6  596.06   46.46
  -5   3  -5  168.94   23.69
  -5   3  -4  307.86   31.75
  -5   3  -3  708.73   48.95
  -5   3  -3  668.43   53.42
  -5   3  -2  492.81   39.54
  -5   3  -2  483.67   43.41
  -5   3  -1  332.49   31.16
  -5   3  -1  309.56   33.67
  -5   3   0  369.55   32.84
  -5   3   0  337.83   34.73
  -5   3   1 1205.31   64.98
  -5   3   1 1120.64   68.99
  -5   3   2  295.75   29.25
  -5   3   2  367.31   35.54
  -5   3   3  692.15   46.28
  -5   3   3  643.96   48.86
  -5   3   4    6.61    5.49
  -5   3   4    2.94    5.82
  -5   3   5 1168.21   67.12
  -5   3   5 1637.73   81.73
  -5   3   6   13.92    7.23
  -5   3   6   12.34    7.55
  -5   3   6   10.26    4.70
  -5   3   7  920.86   56.53
  -5   3   7  935.94   61.70
  -5   3   7  929.76   55.91
  -5   3   8  131.86   19.91
  -5   3   8  167.13   24.27
  -5   3   8  168.40   22.01
  -5   3   9  572.40   46.59
  -5   3   9  553.10   42.42
  -5   3  10  141.66   21.06
  -5   3  10  106.70   19.39
  -5   3  11  112.61   19.93
  -5   3  11  171.81   23.04
  -5   3  12  169.98   23.47
  -5   3  12  138.35   20.80
  -5   3  13  500.37   40.18
  -5   3  13  456.06   39.83
  -5   3  14  122.37   19.60
  -5   3  15   61.47   13.83
  -5   3  16  347.74   32.14
  -5   3  17   35.26    9.57
  -5   3  18  262.68   24.55
  -5   3  19    4.39    4.40
  -5   4 -11  221.28   28.03
  -5   4  -5   52.42   14.31
  -5   4  -4  539.28   45.24
  -5   4  -3  331.77   34.50
  -5   4  -2  773.85   54.35
  -5   4  -2  763.59   60.15
  -5   4  -1  155.60   22.89
  -5   4  -1  163.94   26.43
  -5   4   0  221.39   27.01
  -5   4   0  218.58   29.33
  -5   4   1  457.95   39.28
  -5   4   1  476.84   44.73
  -5   4   2  286.20   30.17
  -5   4   2  258.85   32.43
  -5   4   3  441.39   38.41
  -5   4   3  453.96   42.91
  -5   4   4   35.84   10.67
  -5   4   4   39.07   12.19
  -5   4   5  483.38   40.09
  -5   4   5  475.92   43.58
  -5   4   6   42.59   13.79
  -5   4   7  567.73   44.17
  -5   4   7  555.40   47.03
  -5   4   8   58.76   13.51
  -5   4   8   52.70   13.29
  -5   4   9  427.09   40.69
  -5   4   9  495.08   40.84
  -5   4  10   17.04    7.94
  -5   4  10   13.88    7.01
  -5   4  11  196.32   25.51
  -5   4  11  271.04   29.49
  -5   4  12  100.85   17.84
  -5   4  12   86.31   15.95
  -5   4  13  444.10   38.87
  -5   4  14  221.79   26.00
  -5   4  15  199.44   24.45
  -5   4  16  392.37   33.38
  -5   4  17   32.62    8.93
  -5   4  18  221.04   21.42
  -5   5 -11   70.80   14.18
  -5   5 -10  364.00   35.52
  -5   5  -2  436.21   45.83
  -5   5  -1  164.67   27.82
  -5   5   0  205.69   30.87
  -5   5   1  436.89   39.97
  -5   5   1  471.18   47.20
  -5   5   2  232.55   28.61
  -5   5   2  265.90   34.23
  -5   5   3  248.05   28.96
  -5   5   3  283.17   35.34
  -5   5   4   36.27   12.21
  -5   5   5  646.32   53.79
  -5   5   6   26.32   11.53
  -5   5   7  383.02   39.39
  -5   5   8    6.22    3.53
  -5   5   9  472.12   43.24
  -5   5   9  651.97   48.13
  -5   5  10    7.85    8.00
  -5   5  10   -0.81    3.96
  -5   5  11  529.09   42.14
  -5   5  11  495.54   42.21
  -5   5  12   42.66   12.00
  -5   5  13  496.52   40.78
  -5   5  14  198.64   24.08
  -5   5  15  181.52   22.25
  -5   5  16  337.02   29.42
  -5   5  17  179.82   19.71
  -5   5  18  197.24   18.62
  -5   6 -11   49.77   10.48
  -5   6 -10  269.31   26.65
  -5   6  -9   86.84   16.22
  -5   6  -8  368.84   36.31
  -5   6  -7   45.15   12.06
  -5   6  -6  552.72   48.17
  -5   6  -5   -3.37    9.19
  -5   6  -4  569.32   51.41
  -5   6  -3   29.86   13.40
  -5   6  -2  603.65   53.84
  -5   6  -1  142.15   25.44
  -5   6   0  151.95   26.26
  -5   6   1  323.60   39.45
  -5   6   2  117.18   23.21
  -5   6   3  480.41   47.64
  -5   6   4   58.59   16.62
  -5   6   5  469.47   45.16
  -5   6   6  180.71   27.18
  -5   6   7  261.52   32.04
  -5   6   8    2.21    4.28
  -5   6   9  448.56   40.59
  -5   6   9  627.81   47.26
  -5   6  10   -4.10    5.67
  -5   6  10    2.66    4.56
  -5   6  11  353.75   34.58
  -5   6  12   77.98   15.59
  -5   6  13  327.56   31.21
  -5   6  14  120.53   17.46
  -5   6  15  173.10   20.29
  -5   6  16  172.43   19.01
  -5   6  17  165.45   16.56
  -5   7 -10  254.72   20.89
  -5   7  -9   51.25   10.30
  -5   7  -8  361.34   30.98
  -5   7  -7   -3.15    3.67
  -5   7  -6  539.15   43.16
  -5   7  -5    4.62    6.38
  -5   7  -4  837.51   58.83
  -5   7  -3    4.64    7.31
  -5   7  -2  305.69   35.11
  -5   7  -1   37.58   12.29
  -5   7   0  161.76   26.21
  -5   7   1  195.35   27.98
  -5   7   2  327.79   36.73
  -5   7   3  112.90   21.87
  -5   7   4  264.06   32.86
  -5   7   5  401.19   39.78
  -5   7   6  209.76   27.15
  -5   7   7  157.45   22.80
  -5   7   8   47.24   12.38
  -5   7   9  403.11   35.72
  -5   7  10    2.38    4.44
  -5   7  11  372.58   32.94
  -5   7  12   27.82    9.01
  -5   7  13  320.13   28.24
  -5   7  14   31.35    8.37
  -5   7  15  165.08   17.60
  -5   8  -8  172.90   16.35
  -5   8  -7   34.74    7.68
  -5   8  -6  294.29   25.99
  -5   8  -5   36.80    9.73
  -5   8  -4  561.42   40.67
  -5   8  -3   25.46    9.01
  -5   8  -2  399.34   35.45
  -5   8  -1    5.87    4.38
  -5   8   0  115.63   19.22
  -5   8   1   10.58    5.41
  -5   8   2  390.45   36.29
  -5   8   3  120.68   19.55
  -5   8   4  190.43   23.99
  -5   8   5  114.93   18.04
  -5   8   6  190.25   22.44
  -5   8   7  167.48   20.03
  -5   8   8  122.93   16.67
  -5   8   9  288.45   26.22
  -5   8  10   93.14   13.93
  -5   8  11  228.84   21.90
  -5   8  12    3.00    4.01
  -5   8  13  250.03   20.69
  -5   9  -4  123.00   13.95
  -5   9  -3   -4.17    2.42
  -5   9  -2  150.50   17.12
  -5   9  -1    7.78    4.11
  -5   9   0  217.38   21.58
  -5   9   1   10.54    4.20
  -5   9   2  286.40   24.90
  -5   9   3   55.48   10.80
  -5   9   4  226.07   21.17
  -5   9   5   98.38   12.93
  -5   9   6  146.02   15.06
  -5   9   7  119.12   13.20
  -5   9   8   95.49   11.85
  -5   9   9  168.25   15.42
  -4 -12  -7  104.70   11.11
  -4 -12  -6  171.74   15.14
  -4 -12  -5  113.37   12.77
  -4 -12  -4   69.70    9.98
  -4 -12  -3  217.68   18.64
  -4 -12  -2   83.30   11.15
  -4 -12  -1  342.37   23.77
  -4 -12   0   -0.61    2.20
  -4 -12   1  224.12   17.66
  -4 -12   2    3.95    2.40
  -4 -12   3  387.97   22.15
  -4 -11  -1  348.32   28.68
  -4 -11   0   38.72    9.45
  -4 -11   1  454.79   32.15
  -4 -11   2   -6.79    4.20
  -4 -11   3  262.26   22.12
  -4 -11   4    3.59    3.81
  -4 -11   5  318.29   22.16
  -4 -11   6   26.83    5.54
  -4 -10   2  209.17   23.28
  -4 -10   3  560.45   38.95
  -4 -10   4   11.39    5.51
  -4 -10   5  370.57   28.62
  -4 -10   6    1.05    2.68
  -4 -10   7  241.38   19.79
  -4 -10   8   48.72    7.80
  -4  -9   4   54.16   11.64
  -4  -9   5  407.63   33.32
  -4  -9   6   16.75    5.42
  -4  -9   7  360.24   28.44
  -4  -9   8    1.57    2.86
  -4  -9   9  470.86   28.87
  -4  -9  10   40.94    6.81
  -4  -8   6   84.83   15.37
  -4  -8   7  562.35   39.62
  -4  -8   8    5.82    3.33
  -4  -8   9  702.96   38.65
  -4  -8   9  496.62   34.50
  -4  -8  10   29.11    7.05
  -4  -8  10   34.40    7.66
  -4  -8  11  358.12   24.19
  -4  -8  12  127.25   12.38
  -4  -7   5  993.34   62.64
  -4  -7   6  151.95   22.69
  -4  -7   7  716.34   52.12
  -4  -7   7  516.57   39.69
  -4  -7   8   79.32   17.59
  -4  -7   8   39.49    9.58
  -4  -7   9 1120.59   69.04
  -4  -7   9 1049.36   56.28
  -4  -7  10   26.07    9.42
  -4  -7  11  439.96   32.56
  -4  -7  12  163.83   17.89
  -4  -7  13  287.52   22.64
  -4  -7  14   28.86    6.47
  -4  -6   2  516.29   39.12
  -4  -6   2  583.79   41.22
  -4  -6   3  372.33   29.68
  -4  -6   3  406.32   34.86
  -4  -6   3  380.33   33.38
  -4  -6   4  149.41   19.32
  -4  -6   4  170.98   22.79
  -4  -6   4  162.84   22.01
  -4  -6   5  697.63   46.79
  -4  -6   5  789.69   53.63
  -4  -6   5  656.93   49.15
  -4  -6   6  315.16   31.31
  -4  -6   6  324.75   33.49
  -4  -6   6  325.81   33.78
  -4  -6   7  342.71   33.40
  -4  -6   7  319.60   34.95
  -4  -6   8   22.90   10.90
  -4  -6   8   12.33    5.03
  -4  -6   9 1722.56   94.27
  -4  -6  10  171.35   26.04
  -4  -6  11  981.51   66.21
  -4  -6  12  137.80   22.74
  -4  -6  13  163.16   19.79
  -4  -6  13  154.67   22.30
  -4  -6  14   16.38    7.68
  -4  -6  14   25.04    7.83
  -4  -6  15  241.46   20.50
  -4  -6  16   25.69    5.98
  -4  -5   1  169.02   16.06
  -4  -5   2 1741.28   72.72
  -4  -5   3   86.98   13.00
  -4  -5   4  595.65   43.02
  -4  -5   4  577.43   38.39
  -4  -5   5 1135.15   66.28
  -4  -5   5 1327.70   70.21
  -4  -5   5 1194.61   62.78
  -4  -5   6  239.93   28.25
  -4  -5   6  287.59   30.69
  -4  -5   6  312.74   29.34
  -4  -5   7  212.11   27.88
  -4  -5   7  236.97   28.76
  -4  -5   7  211.00   25.21
  -4  -5   8  201.65   27.49
  -4  -5   8  233.25   28.88
  -4  -5   8  193.02   25.48
  -4  -5   9 1514.01   87.48
  -4  -5   9 1549.43   86.88
  -4  -5  10   29.92   11.92
  -4  -5  10   23.47    9.84
  -4  -5  11  520.17   47.73
  -4  -5  12   13.66    8.26
  -4  -5  13  203.55   28.02
  -4  -5  14    0.50    4.34
  -4  -5  15  207.12   21.44
  -4  -5  15  255.54   27.68
  -4  -5  16   70.31   13.05
  -4  -5  16   50.36    9.28
  -4  -5  17  389.35   24.92
  -4  -4 -12  139.81   16.54
  -4  -4  -1    9.81    3.08
  -4  -4   0 1162.42   47.88
  -4  -4   1   72.91    9.54
  -4  -4   2 2288.54   86.40
  -4  -4   3   23.33    6.46
  -4  -4   4 1278.69   59.99
  -4  -4   5  302.90   25.95
  -4  -4   6  822.95   53.44
  -4  -4   6  899.99   55.16
  -4  -4   6  814.15   49.03
  -4  -4   7  430.55   38.74
  -4  -4   7  471.95   39.41
  -4  -4   7  488.33   37.42
  -4  -4   8  157.02   23.24
  -4  -4   8  161.04   23.14
  -4  -4   8  135.16   19.88
  -4  -4   9  684.33   52.69
  -4  -4   9  650.17   50.59
  -4  -4   9  663.69   48.65
  -4  -4  10  185.35   27.21
  -4  -4  10  204.66   27.81
  -4  -4  10  193.36   25.80
  -4  -4  11  277.52   33.97
  -4  -4  11  255.57   31.47
  -4  -4  12    3.74    4.43
  -4  -4  12    8.32    6.75
  -4  -4  13  111.87   21.86
  -4  -4  14   51.10   14.91
  -4  -4  15  389.65   37.72
  -4  -4  16   45.78   11.96
  -4  -4  16   39.84    9.46
  -4  -4  17  309.68   24.70
  -4  -4  17  359.75   30.32
  -4  -4  18   30.48    7.23
  -4  -4  18   21.92    5.33
  -4  -3 -12   61.97   10.46
  -4  -3 -11  849.36   45.07
  -4  -3 -10  345.68   25.84
  -4  -3  -9 1626.06   69.10
  -4  -3  -2 1913.87   65.79
  -4  -3  -1  105.65    9.74
  -4  -3   0  223.40   15.86
  -4  -3   1   56.00    8.03
  -4  -3   2 1766.61   69.09
  -4  -3   3   16.00    5.18
  -4  -3   4  721.92   34.42
  -4  -3   4  722.72   39.58
  -4  -3   5  598.36   36.79
  -4  -3   6 1030.86   53.86
  -4  -3   7  195.04   23.30
  -4  -3   7  187.79   21.01
  -4  -3   8  771.31   52.42
  -4  -3   8  817.37   53.29
  -4  -3   8  755.31   48.41
  -4  -3   9  555.54   45.46
  -4  -3   9  593.65   45.99
  -4  -3   9  596.75   43.51
  -4  -3  10  582.31   47.92
  -4  -3  10  564.50   45.84
  -4  -3  10  575.38   44.49
  -4  -3  11  270.56   32.83
  -4  -3  11  298.04   33.40
  -4  -3  11  306.65   32.53
  -4  -3  12  393.38   40.42
  -4  -3  12  409.13   39.75
  -4  -3  13  857.58   63.03
  -4  -3  13  884.16   61.32
  -4  -3  14   39.99   11.96
  -4  -3  14   23.29   10.00
  -4  -3  15  551.99   47.40
  -4  -3  16   18.38    7.11
  -4  -3  17  724.59   43.05
  -4  -3  17  670.22   47.54
  -4  -3  18   -0.85    5.16
  -4  -3  18    8.09    3.34
  -4  -3  19  219.15   16.80
  -4  -3  19  253.56   21.11
  -4  -2 -11 1956.68   80.07
  -4  -2 -10   51.59    9.25
  -4  -2  -9 1253.18   56.69
  -4  -2  -8  308.52   23.05
  -4  -2  -7 2406.28   90.66
  -4  -2  -6  351.28   24.15
  -4  -2  -5  799.16   39.70
  -4  -2  -4 1475.06   51.81
  -4  -2  -3  451.95   21.78
  -4  -2  -2 1737.53   62.11
  -4  -2  -1  255.33   16.56
  -4  -2   0  146.66   12.66
  -4  -2   1   97.57   10.71
  -4  -2   1   98.03   10.53
  -4  -2   2 1497.54   60.64
  -4  -2   2 1505.92   58.45
  -4  -2   3  496.04   28.22
  -4  -2   3  370.60   22.57
  -4  -2   4 1474.54   63.46
  -4  -2   4 1506.98   57.38
  -4  -2   5  508.19   32.40
  -4  -2   6 1666.07   73.11
  -4  -2   7  212.28   21.49
  -4  -2   8  702.58   47.39
  -4  -2   8  697.94   47.65
  -4  -2   8  694.14   44.04
  -4  -2   9  365.54   33.80
  -4  -2   9  362.86   34.00
  -4  -2   9  349.00   31.33
  -4  -2  10 1008.07   63.47
  -4  -2  10 1033.42   63.31
  -4  -2  10 1020.21   60.13
  -4  -2  11  614.30   48.93
  -4  -2  11  610.93   47.80
  -4  -2  11  607.69   46.17
  -4  -2  12  192.02   27.02
  -4  -2  12  205.50   27.71
  -4  -2  13  700.80   55.25
  -4  -2  13  770.92   55.48
  -4  -2  14  197.94   27.84
  -4  -2  14  125.53   21.50
  -4  -2  15  450.79   39.91
  -4  -2  15  404.02   40.62
  -4  -2  16   27.98   11.29
  -4  -2  17  615.23   40.97
  -4  -2  17  606.76   46.78
  -4  -2  18    1.21    3.68
  -4  -2  18   12.60    4.88
  -4  -2  19  388.82   25.39
  -4  -2  19  464.13   32.68
  -4  -1 -11 2161.40   87.37
  -4  -1 -10  237.59   20.94
  -4  -1  -9 2811.64  104.69
  -4  -1  -8  248.47   20.41
  -4  -1  -7 1480.77   62.62
  -4  -1  -6   19.33    5.39
  -4  -1  -5 1722.22   68.54
  -4  -1  -4 1073.53   48.01
  -4  -1  -3  625.41   32.91
  -4  -1  -2  566.57   30.30
  -4  -1  -1  510.79   27.94
  -4  -1   0  254.39   18.03
  -4  -1   1  204.58   16.14
  -4  -1   1  233.33   16.80
  -4  -1   2 3376.55  117.88
  -4  -1   2 3501.52  115.72
  -4  -1   3  594.34   29.47
  -4  -1   3  584.20   32.58
  -4  -1   4  796.14   39.28
  -4  -1   4  622.03   31.21
  -4  -1   5   90.47    9.57
  -4  -1   5   79.21   11.73
  -4  -1   6 1903.85   79.71
  -4  -1   7    9.40    5.06
  -4  -1   8  624.93   40.58
  -4  -1   9  375.47   33.77
  -4  -1   9  357.01   32.57
  -4  -1   9  366.91   31.14
  -4  -1  10  299.77   31.03
  -4  -1  10  348.78   33.00
  -4  -1  10  314.49   29.90
  -4  -1  11  624.22   47.70
  -4  -1  11  615.91   47.35
  -4  -1  11  703.08   47.83
  -4  -1  12  190.10   25.92
  -4  -1  12  222.07   27.24
  -4  -1  12  198.22   25.04
  -4  -1  13  745.25   54.64
  -4  -1  13  641.99   49.83
  -4  -1  14   82.58   17.92
  -4  -1  14   64.55   13.63
  -4  -1  15  178.90   25.59
  -4  -1  15  182.05   24.43
  -4  -1  16   85.44   16.57
  -4  -1  16   62.80   14.95
  -4  -1  17  634.17   48.24
  -4  -1  18   43.34   11.18
  -4  -1  18   29.01    7.91
  -4  -1  19  383.85   25.11
  -4  -1  19  343.14   29.81
  -4  -1  20    9.15    5.25
  -4   0 -10   42.60    9.10
  -4   0  -9 1093.83   53.46
  -4   0  -8    0.65    2.07
  -4   0  -7 2687.98  100.49
  -4   0  -6   61.68    9.78
  -4   0  -5  651.45   35.41
  -4   0  -4  217.95   18.22
  -4   0  -3 1267.68   54.20
  -4   0  -2  781.03   38.12
  -4   0  -1  585.04   31.11
  -4   0   0  613.83   31.69
  -4   0   1  172.29   14.57
  -4   0   2 1487.35   58.59
  -4   0   3  522.21   30.41
  -4   0   3  525.07   27.98
  -4   0   4 1361.37   57.42
  -4   0   4 1721.22   65.76
  -4   0   5   50.09    9.33
  -4   0   5   67.41    8.63
  -4   0   6 1976.70   81.59
  -4   0   7   -1.87    2.80
  -4   0   8  606.95   39.66
  -4   0   9  160.68   19.81
  -4   0   9  167.04   21.70
  -4   0   9  151.32   20.07
  -4   0  10  949.38   55.68
  -4   0  10  931.83   58.78
  -4   0  10 1007.22   59.09
  -4   0  11  239.01   26.36
  -4   0  11  209.08   25.73
  -4   0  11  212.42   25.47
  -4   0  12   51.06   12.78
  -4   0  12   60.56   13.49
  -4   0  12   46.03   13.17
  -4   0  13  863.26   57.19
  -4   0  13  648.73   49.71
  -4   0  14  230.89   28.49
  -4   0  14  184.39   24.70
  -4   0  15  272.56   31.80
  -4   0  15  313.20   31.74
  -4   0  16  150.44   23.46
  -4   0  17  431.88   39.11
  -4   0  18   92.19   13.19
  -4   0  18  125.46   19.26
  -4   0  19  273.88   26.74
  -4   0  20    1.28    3.31
  -4   1 -10   53.77   10.97
  -4   1  -9  876.01   49.39
  -4   1  -8    3.64    2.81
  -4   1  -7  389.25   28.85
  -4   1  -6   72.26   11.36
  -4   1  -5 1048.85   50.86
  -4   1  -4  251.70   20.99
  -4   1  -3  750.91   39.25
  -4   1  -2  415.87   26.86
  -4   1  -1  851.87   41.84
  -4   1   0  839.98   41.02
  -4   1   1  114.37   12.65
  -4   1   2  262.21   19.83
  -4   1   3   12.31    4.10
  -4   1   4  837.86   40.95
  -4   1   5   70.78   10.15
  -4   1   5   71.90   11.12
  -4   1   6 3002.53  113.25
  -4   1   7  434.19   31.60
  -4   1   8  730.31   44.50
  -4   1   9   39.12    9.66
  -4   1   9   48.67   10.91
  -4   1   9   62.01   13.05
  -4   1  10 1275.18   66.35
  -4   1  10 1228.65   68.85
  -4   1  10 1231.21   67.04
  -4   1  11  139.51   19.73
  -4   1  11  140.14   20.93
  -4   1  11  161.19   22.06
  -4   1  12  548.63   41.65
  -4   1  12  419.90   38.30
  -4   1  12  517.73   41.59
  -4   1  13  747.87   52.17
  -4   1  13  593.58   46.25
  -4   1  14  378.77   36.21
  -4   1  14  236.81   27.77
  -4   1  15  164.42   23.65
  -4   1  16  196.80   26.65
  -4   1  17  437.70   38.75
  -4   1  18  152.11   21.12
  -4   1  19  333.68   29.99
  -4   1  20   20.71    6.38
  -4   2  -9  729.11   47.50
  -4   2  -8  182.26   21.53
  -4   2  -7  624.05   41.57
  -4   2  -6  159.08   19.00
  -4   2  -5  230.23   22.40
  -4   2  -4  252.31   22.93
  -4   2  -3 2072.17   85.52
  -4   2  -2  233.40   21.34
  -4   2  -1 1393.09   62.81
  -4   2   0  492.82   31.56
  -4   2   1  687.02   38.48
  -4   2   2 1481.79   64.64
  -4   2   3  461.37   30.39
  -4   2   4 1517.79   66.34
  -4   2   5  109.38   14.05
  -4   2   6 1742.10   77.84
  -4   2   6 1921.32   78.74
  -4   2   7   56.20   10.93
  -4   2   8  497.65   36.56
  -4   2   8  631.76   41.35
  -4   2   9    2.20    3.14
  -4   2   9    9.27    5.63
  -4   2   9    5.36    5.16
  -4   2  10 1298.75   68.56
  -4   2  10 1355.88   73.12
  -4   2  10 1302.94   69.59
  -4   2  11   10.84    5.73
  -4   2  11   -3.15    3.59
  -4   2  11    8.18    6.99
  -4   2  12  587.76   43.12
  -4   2  12  580.37   43.82
  -4   2  13  164.01   22.54
  -4   2  13  119.99   19.56
  -4   2  14  685.65   50.75
  -4   2  15   28.77   10.64
  -4   2  16  303.62   32.09
  -4   2  17  223.34   26.77
  -4   2  18  185.15   23.27
  -4   2  19  292.39   27.51
  -4   2  20   38.88    8.79
  -4   3  -9  769.97   53.01
  -4   3  -8   91.75   16.63
  -4   3  -7  774.85   51.38
  -4   3  -6    7.11    4.52
  -4   3  -5 1383.16   71.09
  -4   3  -4   15.28    6.95
  -4   3  -3 1083.01   58.77
  -4   3  -2  303.41   27.31
  -4   3  -1 2152.01   91.62
  -4   3   0  251.06   23.96
  -4   3   1  972.14   52.42
  -4   3   2  469.63   33.51
  -4   3   3 1111.53   57.18
  -4   3   4  360.63   29.04
  -4   3   5  409.95   31.54
  -4   3   6  359.02   29.80
  -4   3   7  206.91   22.18
  -4   3   7  237.36   26.15
  -4   3   8  649.80   42.94
  -4   3   8  656.45   46.74
  -4   3   9    4.36    3.40
  -4   3   9    7.93    7.49
  -4   3   9   -1.03    5.75
  -4   3   9    2.25    4.26
  -4   3  10  865.41   53.41
  -4   3  10  899.95   57.11
  -4   3  10  824.88   53.41
  -4   3  11   24.98    8.02
  -4   3  11   53.24   12.03
  -4   3  11   36.06    9.97
  -4   3  12  542.88   43.48
  -4   3  13   10.01    6.63
  -4   3  14  730.60   52.57
  -4   3  15    2.67    4.96
  -4   3  16  388.82   36.37
  -4   3  17  239.48   27.18
  -4   3  18  270.12   27.63
  -4   3  19   60.73   11.69
  -4   3  20   34.47    8.52
  -4   4  -8  230.92   28.18
  -4   4  -7  539.71   44.81
  -4   4  -6   54.61   13.39
  -4   4  -5  848.54   56.40
  -4   4  -4   93.25   16.68
  -4   4  -3  907.17   56.77
  -4   4  -2   -2.00    2.62
  -4   4  -1 1500.00   76.23
  -4   4   0   18.73    6.70
  -4   4   1 1057.04   59.54
  -4   4   2  458.93   36.13
  -4   4   2  467.46   40.89
  -4   4   3  789.58   49.92
  -4   4   3  861.49   56.66
  -4   4   4  398.45   33.25
  -4   4   4  394.63   36.36
  -4   4   5  335.80   30.41
  -4   4   5  352.52   33.97
  -4   4   6  525.05   40.21
  -4   4   6  791.69   51.84
  -4   4   7   99.07   17.92
  -4   4   7   85.51   13.24
  -4   4   8  562.68   40.75
  -4   4   8  571.53   44.70
  -4   4   8  540.10   36.29
  -4   4   9   90.72   16.00
  -4   4   9   74.00   15.41
  -4   4   9   81.48   13.68
  -4   4  10  730.75   48.55
  -4   4  10  707.47   49.26
  -4   4  10  693.13   42.95
  -4   4  11   35.25   11.40
  -4   4  12  462.48   40.49
  -4   4  13   29.14    9.66
  -4   4  14 1104.62   67.29
  -4   4  15   15.58    8.63
  -4   4  16  356.70   34.11
  -4   4  17  108.30   18.13
  -4   4  18  253.31   25.88
  -4   4  19   55.03   10.98
  -4   4  20   54.68   10.05
  -4   5  -6  287.33   32.52
  -4   5  -5 1131.43   70.37
  -4   5  -4   71.22   16.16
  -4   5  -3  565.33   46.12
  -4   5  -2   18.61    5.88
  -4   5  -1 1240.26   71.42
  -4   5   0    0.60    4.56
  -4   5   1  715.70   50.17
  -4   5   2   74.11   14.87
  -4   5   2   98.55   18.82
  -4   5   3  488.14   40.00
  -4   5   3  536.95   46.79
  -4   5   3  533.19   37.74
  -4   5   4   58.60   13.09
  -4   5   4   78.81   16.37
  -4   5   4   63.96   12.33
  -4   5   5  323.35   31.62
  -4   5   5  325.08   35.06
  -4   5   5  361.37   30.05
  -4   5   6  312.45   33.14
  -4   5   6  322.96   28.07
  -4   5   7  336.67   34.06
  -4   5   7  289.75   27.07
  -4   5   8  392.63   34.77
  -4   5   8  461.35   34.66
  -4   5   9   72.17   14.83
  -4   5   9   72.42   15.49
  -4   5   9   80.51   14.37
  -4   5  10  444.20   34.81
  -4   5  11  103.67   18.96
  -4   5  11  114.73   16.66
  -4   5  12  399.32   38.19
  -4   5  13   19.59    8.60
  -4   5  14  800.02   55.50
  -4   5  15    3.21    4.27
  -4   5  16  378.19   34.48
  -4   5  17   67.32   13.26
  -4   5  18  184.36   21.71
  -4   5  19   85.51   12.95
  -4   6 -13    4.35    3.52
  -4   6  -3  666.03   44.84
  -4   6  -2   71.90   13.61
  -4   6  -1  925.24   62.67
  -4   6  -1 1009.16   58.25
  -4   6   0    9.51    6.38
  -4   6   0    0.26    6.38
  -4   6   1  409.18   39.15
  -4   6   1  505.97   38.81
  -4   6   2   90.00   17.10
  -4   6   2   79.16   18.45
  -4   6   2   55.24   11.99
  -4   6   3  460.71   40.43
  -4   6   3  513.07   47.43
  -4   6   3  449.58   36.74
  -4   6   4   30.14   10.25
  -4   6   4   33.38   12.16
  -4   6   4   27.37    8.75
  -4   6   5  402.79   37.15
  -4   6   5  433.64   42.30
  -4   6   5  447.61   36.28
  -4   6   6   77.21   15.42
  -4   6   6  108.11   20.36
  -4   6   6   92.55   16.02
  -4   6   7  266.14   31.61
  -4   6   7  326.34   30.43
  -4   6   8  177.34   25.01
  -4   6   8  255.67   26.37
  -4   6   9  117.43   19.50
  -4   6   9  125.84   18.23
  -4   6  10  449.83   36.38
  -4   6  11  113.08   17.58
  -4   6  12  467.82   41.99
  -4   6  13    2.60    4.08
  -4   6  14  560.39   44.49
  -4   6  15    4.99    3.45
  -4   6  16  342.39   31.11
  -4   6  17    1.92    3.64
  -4   6  18  326.16   26.52
  -4   6  19   40.11    7.79
  -4   7 -12  284.03   22.02
  -4   7  -8  197.40   19.63
  -4   7  -7  363.83   28.30
  -4   7  -6  464.93   33.69
  -4   7  -5  403.43   31.95
  -4   7  -4  420.14   33.50
  -4   7  -3  133.83   18.50
  -4   7  -2   69.49   13.21
  -4   7  -1  680.02   45.99
  -4   7   0   -2.44    6.00
  -4   7   1  408.18   43.40
  -4   7   1  403.31   34.84
  -4   7   2   22.22    9.87
  -4   7   2   16.73    6.56
  -4   7   3  469.35   45.93
  -4   7   3  469.14   38.45
  -4   7   4    1.52    3.72
  -4   7   4    1.60    5.19
  -4   7   5  392.00   40.91
  -4   7   5  566.70   41.79
  -4   7   6    5.48    5.28
  -4   7   6    7.76    5.49
  -4   7   7  304.96   33.70
  -4   7   7  433.71   35.46
  -4   7   8  126.12   20.70
  -4   7   8  124.36   18.10
  -4   7   9  177.33   22.03
  -4   7  10  425.80   34.97
  -4   7  11  283.67   27.36
  -4   7  12  318.16   33.35
  -4   7  13   79.21   16.45
  -4   7  14  410.80   35.60
  -4   7  15   37.93   10.49
  -4   7  16  273.17   25.44
  -4   7  17    9.09    5.44
  -4   7  18  217.71   18.49
  -4   8 -10   50.26    9.18
  -4   8  -9   17.60    5.86
  -4   8  -7    1.22    3.83
  -4   8  -6  310.60   23.88
  -4   8  -5   10.29    5.27
  -4   8  -4  634.81   39.25
  -4   8  -3  120.57   16.15
  -4   8  -2  217.69   22.42
  -4   8  -1  179.89   26.65
  -4   8  -1  186.20   21.00
  -4   8   0   13.58    7.74
  -4   8   0    4.20    4.14
  -4   8   1  571.59   48.38
  -4   8   1  507.61   37.92
  -4   8   2   -0.42    4.75
  -4   8   2    1.97    4.24
  -4   8   3  314.16   35.15
  -4   8   3  389.47   32.78
  -4   8   4    2.22    6.26
  -4   8   4    5.40    5.04
  -4   8   5  215.77   27.71
  -4   8   5  363.47   31.36
  -4   8   6  139.18   20.88
  -4   8   6  134.28   18.73
  -4   8   7  436.35   37.50
  -4   8   7  512.26   38.26
  -4   8   8   49.02   11.32
  -4   8   9  314.49   28.59
  -4   8  10  153.04   18.87
  -4   8  11  280.15   29.25
  -4   8  11  212.20   21.98
  -4   8  12  139.34   19.75
  -4   8  13   60.41   12.88
  -4   8  14  327.83   28.41
  -4   8  15   33.50    8.07
  -4   8  16  235.81   20.36
  -4   9  -7   -0.09    2.36
  -4   9  -6  276.98   24.47
  -4   9  -5   31.89    8.37
  -4   9  -4  110.23   16.77
  -4   9  -4  156.07   14.72
  -4   9  -3   90.76   15.31
  -4   9  -3   75.00   11.02
  -4   9  -2  232.06   25.65
  -4   9  -2  216.40   19.35
  -4   9  -1  187.66   23.54
  -4   9  -1  184.02   18.29
  -4   9   0   72.81   14.60
  -4   9   0  105.92   14.12
  -4   9   1  203.51   24.45
  -4   9   1  186.93   19.37
  -4   9   2   11.19    4.55
  -4   9   2   12.89    5.88
  -4   9   3  395.12   34.76
  -4   9   3  467.59   32.67
  -4   9   4   15.56    8.31
  -4   9   4   10.60    3.72
  -4   9   5  343.56   30.33
  -4   9   5  375.82   29.08
  -4   9   6   -2.83    4.08
  -4   9   7  511.67   34.65
  -4   9   8   13.69    5.37
  -4   9   9  291.19   24.00
  -4   9  10  119.67   14.38
  -4   9  11  347.11   28.84
  -4   9  12   66.41   11.64
  -4   9  13  158.55   16.95
  -4   9  14  146.18   15.03
  -4  10  -3   31.10    6.80
  -4  10  -2  153.96   16.01
  -4  10  -1  102.25   13.25
  -4  10   0  118.69   14.37
  -4  10   0  103.07   10.91
  -4  10   1  204.09   19.04
  -4  10   1  174.13   14.97
  -4  10   2   29.83    7.58
  -4  10   2   23.07    5.00
  -4  10   3  226.72   19.63
  -4  10   3  224.81   17.87
  -4  10   4   21.99    5.61
  -4  10   5  208.24   17.20
  -4  10   6    0.04    2.84
  -4  10   7  289.65   20.34
  -4  10   8   15.65    4.30
  -4  10   9  278.20   21.52
  -4  10   9  253.19   17.86
  -4  10  10   41.82    7.65
  -3 -12  -5  357.87   23.53
  -3 -12  -4   -0.52    2.03
  -3 -12  -3  452.20   28.27
  -3 -12  -2  119.20   13.41
  -3 -12  -1  514.43   30.72
  -3 -12   0  277.82   21.01
  -3 -12   1  155.62   14.85
  -3 -12   2  384.17   24.07
  -3 -12   3   15.51    4.21
  -3 -12   4  130.38   11.51
  -3 -11  -5  373.93   29.21
  -3 -11  -4    7.20    3.92
  -3 -11  -3  646.60   41.36
  -3 -11  -2  126.15   17.08
  -3 -11  -1  611.74   40.00
  -3 -11   0  610.02   39.64
  -3 -11   1   59.67   10.95
  -3 -11   2  227.05   21.78
  -3 -11   3  133.94   16.37
  -3 -11   4  225.10   20.15
  -3 -11   5   56.18    9.19
  -3 -11   6  207.05   17.16
  -3 -11   7   42.36    6.91
  -3 -10   1  204.59   24.14
  -3 -10   2  145.54   19.34
  -3 -10   3  149.85   19.39
  -3 -10   4  192.36   21.32
  -3 -10   5  214.65   22.04
  -3 -10   6  277.38   24.17
  -3 -10   7   88.12   12.41
  -3 -10   8  287.78   21.67
  -3 -10   9   36.73    6.69
  -3  -9   3  348.08   32.33
  -3  -9   4  226.05   25.42
  -3  -9   5   83.17   15.37
  -3  -9   6  398.29   32.85
  -3  -9   7  211.52   22.23
  -3  -9   8  365.63   28.73
  -3  -9   9   29.61    7.11
  -3  -9  10  316.35   22.69
  -3  -9  11   26.86    5.74
  -3  -8   5  540.34   41.29
  -3  -8   6  401.34   34.47
  -3  -8   7  466.84   36.42
  -3  -8   8  456.06   35.19
  -3  -8   9   21.84    6.41
  -3  -8  10  460.24   30.60
  -3  -8  10  479.97   32.68
  -3  -8  11  117.09   13.58
  -3  -8  11  134.80   14.84
  -3  -8  12  429.94   26.23
  -3  -8  13   11.17    3.68
  -3  -7   3 1298.27   63.13
  -3  -7   4    8.19    4.78
  -3  -7   5  471.02   36.95
  -3  -7   5  500.42   41.28
  -3  -7   6  189.73   23.43
  -3  -7   6  203.35   26.10
  -3  -7   7 1132.09   69.09
  -3  -7   7 1030.56   60.24
  -3  -7   8  184.67   26.08
  -3  -7   8  136.79   19.03
  -3  -7   9  114.59   20.60
  -3  -7   9   92.61   15.38
  -3  -7  10  465.58   35.00
  -3  -7  10  550.99   44.78
  -3  -7  11   98.47   15.29
  -3  -7  11   84.09   13.21
  -3  -7  12  709.48   42.47
  -3  -7  13    6.82    3.97
  -3  -7  14  375.37   25.46
  -3  -7  15   15.97    4.72
  -3  -6   0  413.16   25.33
  -3  -6   1 2038.96   79.69
  -3  -6   2  225.90   20.40
  -3  -6   3  850.01   46.92
  -3  -6   4   74.96   12.56
  -3  -6   4   73.35   13.63
  -3  -6   5  592.98   41.24
  -3  -6   5  582.30   43.86
  -3  -6   6  143.57   20.01
  -3  -6   6  155.04   22.47
  -3  -6   7  974.43   59.93
  -3  -6   7  978.63   63.21
  -3  -6   8  181.36   24.15
  -3  -6   8  201.12   26.88
  -3  -6   9  719.70   53.88
  -3  -6   9  567.34   40.71
  -3  -6  10  326.64   35.73
  -3  -6  10  249.87   24.95
  -3  -6  11  188.12   27.28
  -3  -6  12  267.48   32.28
  -3  -6  13    8.84    5.81
  -3  -6  13    5.28    4.70
  -3  -6  14  404.25   31.85
  -3  -6  14  494.73   39.86
  -3  -6  15    5.31    4.67
  -3  -6  16  140.94   14.67
  -3  -6  17    4.60    2.13
  -3  -5  -1 2120.65   75.03
  -3  -5   0  263.05   18.52
  -3  -5   1 1769.87   69.51
  -3  -5   2   90.68   11.71
  -3  -5   3  747.86   41.52
  -3  -5   4   87.43   13.46
  -3  -5   5  295.47   26.71
  -3  -5   6   10.44    4.80
  -3  -5   6   12.70    4.54
  -3  -5   6   21.64    7.71
  -3  -5   7 1611.03   81.10
  -3  -5   7 1578.84   84.08
  -3  -5   7 1830.53   89.51
  -3  -5   8  138.78   20.68
  -3  -5   8   99.63   18.44
  -3  -5   8  160.64   23.88
  -3  -5   8  124.41   17.84
  -3  -5   9  335.30   35.37
  -3  -5   9  318.76   32.88
  -3  -5  10  121.41   22.28
  -3  -5  10  142.87   22.55
  -3  -5  11  585.63   50.29
  -3  -5  12   43.05   14.54
  -3  -5  13   18.86    7.35
  -3  -5  14  183.21   22.61
  -3  -5  14  187.12   26.00
  -3  -5  15  105.04   18.06
  -3  -5  15  108.52   16.22
  -3  -5  16  328.79   27.16
  -3  -5  16  340.93   31.29
  -3  -5  17    7.41    3.64
  -3  -5  17    6.82    4.69
  -3  -5  18  367.63   23.16
  -3  -4  -2 1629.91   55.99
  -3  -4  -1  585.27   26.72
  -3  -4   0  234.16   15.75
  -3  -4   1 1571.43   60.51
  -3  -4   2   18.10    4.96
  -3  -4   3   31.00    6.67
  -3  -4   4   47.71    8.93
  -3  -4   5  357.61   27.30
  -3  -4   6  111.54   15.81
  -3  -4   7 1336.26   67.62
  -3  -4   8   33.24   10.08
  -3  -4   8   20.45    8.61
  -3  -4   8   16.88    6.43
  -3  -4   9 1017.16   65.30
  -3  -4   9 1112.63   67.19
  -3  -4   9 1139.95   65.11
  -3  -4  10  428.74   41.07
  -3  -4  10  501.94   43.33
  -3  -4  10  536.78   43.41
  -3  -4  11  653.16   52.62
  -3  -4  11  658.00   51.71
  -3  -4  11  625.36   49.50
  -3  -4  12  180.61   26.90
  -3  -4  13  446.66   43.95
  -3  -4  14  824.34   60.66
  -3  -4  15  286.69   29.00
  -3  -4  15  283.15   32.99
  -3  -4  16  256.19   25.64
  -3  -4  16  271.64   30.20
  -3  -4  17   15.87    7.39
  -3  -4  17   15.06    5.94
  -3  -4  18  214.80   19.71
  -3  -4  18  286.85   25.30
  -3  -4  19    7.44    3.33
  -3  -3 -11  544.96   30.88
  -3  -3  -3   49.19    4.18
  -3  -3  -2 1261.27   43.42
  -3  -3  -1  539.83   23.43
  -3  -3   0  957.21   37.91
  -3  -3   1  635.83   29.44
  -3  -3   2   97.65   10.25
  -3  -3   3 1048.68   45.89
  -3  -3   4  114.67   12.69
  -3  -3   5 1118.75   52.13
  -3  -3   6    5.58    3.61
  -3  -3   7 1844.99   80.08
  -3  -3   8   62.17   12.09
  -3  -3   9  858.86   55.46
  -3  -3   9  907.12   56.41
  -3  -3   9  876.41   53.02
  -3  -3  10  115.86   19.34
  -3  -3  10  130.57   20.98
  -3  -3  10  116.70   18.49
  -3  -3  11 1741.38   91.74
  -3  -3  11 1730.58   90.28
  -3  -3  11 1780.39   89.18
  -3  -3  12  311.07   34.96
  -3  -3  12  310.11   33.95
  -3  -3  12  327.65   34.00
  -3  -3  13  612.71   51.50
  -3  -3  13  689.85   52.24
  -3  -3  14  536.80   48.02
  -3  -3  15  589.31   50.01
  -3  -3  16  422.84   35.56
  -3  -3  16  436.50   41.14
  -3  -3  17   33.83   10.24
  -3  -3  17   25.60    8.20
  -3  -3  18  236.03   22.28
  -3  -3  18  227.94   25.25
  -3  -3  19   68.18   11.77
  -3  -3  19   56.11    9.61
  -3  -3  20  143.69   12.71
  -3  -2 -11  801.01   39.15
  -3  -2 -10 1363.70   56.44
  -3  -2  -9   34.54    6.44
  -3  -2  -4 1414.80   45.95
  -3  -2  -3   49.75    4.57
  -3  -2  -2 1344.13   46.10
  -3  -2  -1  235.14   13.28
  -3  -2   0 1247.05   45.92
  -3  -2   1  452.03   22.73
  -3  -2   2 1336.27   51.58
  -3  -2   3 1832.74   68.24
  -3  -2   4  712.74   35.41
  -3  -2   5 1118.32   50.82
  -3  -2   5 1167.71   42.35
  -3  -2   6   69.83   10.59
  -3  -2   7 1880.33   78.13
  -3  -2   8   22.78    6.61
  -3  -2   9 1938.14   85.53
  -3  -2  10   55.92   12.61
  -3  -2  10   85.72   15.42
  -3  -2  10   53.52   11.88
  -3  -2  11  730.50   52.62
  -3  -2  11  821.90   53.88
  -3  -2  11  757.73   50.20
  -3  -2  12   18.16    6.66
  -3  -2  12    9.74    5.94
  -3  -2  13  589.19   48.76
  -3  -2  13  615.58   48.59
  -3  -2  13  676.24   50.27
  -3  -2  14  402.41   39.92
  -3  -2  14  360.16   36.12
  -3  -2  15  543.69   47.53
  -3  -2  16  191.12   27.52
  -3  -2  17   83.37   16.95
  -3  -2  17   59.95   12.71
  -3  -2  18  409.99   32.03
  -3  -2  18  406.75   36.56
  -3  -2  19  148.35   16.55
  -3  -2  19  156.98   20.24
  -3  -2  20  103.08   11.63
  -3  -2  20   96.85   13.53
  -3  -1 -10 2550.24   92.37
  -3  -1  -9   29.93    5.81
  -3  -1  -8 1459.29   57.85
  -3  -1  -7   10.26    3.31
  -3  -1  -6 3416.75  114.05
  -3  -1  -5   16.89    3.78
  -3  -1  -4  667.02   30.86
  -3  -1  -3  389.34   21.19
  -3  -1   0 2653.29   88.12
  -3  -1   1  288.29   17.18
  -3  -1   1  321.84   17.29
  -3  -1   2  716.75   32.55
  -3  -1   2  751.37   30.80
  -3  -1   3 1715.02   64.90
  -3  -1   3 1772.54   60.56
  -3  -1   4  744.00   36.32
  -3  -1   4  796.21   31.30
  -3  -1   5 1606.10   63.81
  -3  -1   5 1576.21   54.61
  -3  -1   6  408.96   26.53
  -3  -1   7 1724.37   71.74
  -3  -1   8  240.81   21.62
  -3  -1   9  653.26   40.58
  -3  -1  10    6.06    4.83
  -3  -1  11 1403.14   74.39
  -3  -1  11 1426.04   73.79
  -3  -1  11 1341.67   69.86
  -3  -1  12    5.73    6.01
  -3  -1  12   12.14    7.76
  -3  -1  12    9.90    5.48
  -3  -1  13  733.64   52.51
  -3  -1  13  714.83   49.77
  -3  -1  14   50.62   12.61
  -3  -1  14   66.87   15.42
  -3  -1  15  746.40   54.55
  -3  -1  15  528.03   44.45
  -3  -1  16  137.54   22.78
  -3  -1  17  113.08   20.05
  -3  -1  17   99.82   17.05
  -3  -1  18  232.98   24.29
  -3  -1  18  267.07   29.89
  -3  -1  19  264.20   23.47
  -3  -1  19  314.84   30.42
  -3  -1  20  137.36   14.12
  -3  -1  20  148.51   18.44
  -3  -1  21   52.79    8.82
  -3   0 -10  870.87   43.09
  -3   0  -9  564.66   31.51
  -3   0  -8 1128.87   48.96
  -3   0  -7  293.22   19.98
  -3   0  -6 1476.42   57.87
  -3   0  -5  798.97   36.32
  -3   0  -4 2725.71   93.23
  -3   0  -3  178.02   13.53
  -3   0  -2 1385.30   52.47
  -3   0  -1  163.26   12.36
  -3   0   0  129.87   10.60
  -3   0   1  243.66   15.15
  -3   0   2  439.61   21.71
  -3   0   3 2496.36   83.19
  -3   0   4 2946.19  101.64
  -3   0   4 2905.94   89.37
  -3   0   4 3027.70   96.13
  -3   0   5  376.95   23.99
  -3   0   5  381.97   19.77
  -3   0   6  517.96   30.27
  -3   0   7 1180.12   53.97
  -3   0   8  402.72   28.40
  -3   0   9 1153.20   56.98
  -3   0  10   17.53    6.82
  -3   0  11  818.68   51.71
  -3   0  11  823.47   51.00
  -3   0  11  757.63   47.47
  -3   0  12    4.66    6.14
  -3   0  12    3.10    5.97
  -3   0  12    6.26    4.33
  -3   0  13  788.85   53.97
  -3   0  13  703.67   50.06
  -3   0  13  842.93   52.88
  -3   0  14   65.06   13.72
  -3   0  14   50.78   13.94
  -3   0  14   49.79   12.17
  -3   0  15  612.98   48.94
  -3   0  16   16.88    8.86
  -3   0  17  102.03   19.13
  -3   0  17   91.00   16.04
  -3   0  18  123.23   16.97
  -3   0  18  167.54   23.63
  -3   0  19  347.37   26.60
  -3   0  19  331.93   32.36
  -3   0  20  156.47   19.59
  -3   0  21   64.01   10.79
  -3   1  -9  245.15   21.09
  -3   1  -8   54.94    9.30
  -3   1  -7  736.96   38.24
  -3   1  -6 2165.01   81.50
  -3   1  -5  749.05   36.71
  -3   1  -4  713.21   34.90
  -3   1  -3  120.04   11.90
  -3   1  -2 2299.99   81.66
  -3   1  -1   88.76    9.61
  -3   1   0 2154.28   76.22
  -3   1   1  268.37   17.30
  -3   1   2  638.43   29.92
  -3   1   3 2952.14   99.37
  -3   1   4 2425.81   84.32
  -3   1   5 1021.98   38.36
  -3   1   5 1080.09   44.19
  -3   1   6 1820.11   69.50
  -3   1   6 1900.21   59.42
  -3   1   7  570.52   34.12
  -3   1   7  621.07   26.61
  -3   1   8  441.74   29.94
  -3   1   9  596.64   37.34
  -3   1  10  185.63   20.00
  -3   1  11 1298.93   65.74
  -3   1  11 1329.88   69.35
  -3   1  12   36.90   10.41
  -3   1  12   35.07   10.43
  -3   1  12   39.85   10.78
  -3   1  13  271.50   27.68
  -3   1  13  254.65   28.21
  -3   1  14   32.05    9.70
  -3   1  14   32.46   10.21
  -3   1  15  704.80   52.40
  -3   1  16   -2.28    4.59
  -3   1  17  328.35   34.33
  -3   1  18   89.64   17.42
  -3   1  19  516.08   41.02
  -3   1  20  122.17   17.70
  -3   1  21  118.52   15.20
  -3   2  -9  861.83   48.65
  -3   2  -8  679.03   41.02
  -3   2  -7  240.95   21.86
  -3   2  -6  472.59   31.16
  -3   2  -5  245.26   20.84
  -3   2  -4 1861.90   74.66
  -3   2  -3  363.90   24.78
  -3   2  -2 1122.33   50.07
  -3   2  -1   64.65    9.37
  -3   2   0 1130.27   49.28
  -3   2   1    6.66    2.49
  -3   2   2 3251.65  112.24
  -3   2   3   26.11    6.04
  -3   2   4 3058.40  107.72
  -3   2   5  711.26   36.87
  -3   2   6 1375.54   59.17
  -3   2   7  211.27   19.22
  -3   2   7  223.41   15.37
  -3   2   7  237.09   19.25
  -3   2   8 1295.37   62.02
  -3   2   8 1469.51   54.90
  -3   2   9  672.78   40.19
  -3   2  10   83.42   13.55
  -3   2  11  730.37   45.65
  -3   2  11  776.11   49.31
  -3   2  12  215.46   23.54
  -3   2  12  192.23   23.69
  -3   2  13  381.93   33.06
  -3   2  13  363.79   34.44
  -3   2  14    7.07    7.64
  -3   2  14   -0.04    5.11
  -3   2  15  737.08   52.94
  -3   2  16   15.44    8.23
  -3   2  17  351.24   35.16
  -3   2  18  155.65   22.41
  -3   2  19  637.18   45.74
  -3   2  20   49.64   11.49
  -3   2  21  271.51   23.63
  -3   3  -8  288.90   27.66
  -3   3  -7 1311.27   66.41
  -3   3  -6  182.50   20.66
  -3   3  -5  772.14   45.63
  -3   3  -4  701.28   42.15
  -3   3  -3  801.71   44.64
  -3   3  -2 1358.87   62.44
  -3   3  -1   53.75   10.33
  -3   3   0 1165.19   55.00
  -3   3   1   -2.10    3.29
  -3   3   2 1773.46   73.57
  -3   3   3   14.41    5.18
  -3   3   4  887.84   45.94
  -3   3   5  344.48   26.14
  -3   3   6  315.23   25.29
  -3   3   7  127.31   15.66
  -3   3   8  301.48   25.03
  -3   3   8  307.56   21.13
  -3   3   9  307.50   26.22
  -3   3   9  321.83   22.13
  -3   3  10  478.42   34.47
  -3   3  10  466.39   32.61
  -3   3  11 1400.22   69.97
  -3   3  11 1460.20   74.35
  -3   3  12  319.01   29.44
  -3   3  12  334.01   31.89
  -3   3  13  306.69   29.44
  -3   3  13  283.08   30.18
  -3   3  14   -0.70    5.24
  -3   3  15 1289.56   74.11
  -3   3  16   29.12   10.72
  -3   3  17  413.18   37.74
  -3   3  18   36.88   11.23
  -3   3  19  423.02   35.77
  -3   3  20  119.89   16.76
  -3   3  21  336.68   26.23
  -3   4  -8  332.18   31.88
  -3   4  -7  819.37   53.13
  -3   4  -6  142.67   20.13
  -3   4  -5  635.58   44.53
  -3   4  -4 1689.75   80.92
  -3   4  -3  718.32   46.02
  -3   4  -2  864.25   50.76
  -3   4  -1   98.41   14.97
  -3   4   0 1108.62   57.77
  -3   4   1  400.36   30.81
  -3   4   2 2231.92   92.78
  -3   4   3   22.14    6.76
  -3   4   4  690.91   42.47
  -3   4   5  314.29   27.00
  -3   4   6  146.45   17.99
  -3   4   7   15.10    6.04
  -3   4   8  695.92   38.30
  -3   4   9   77.71   11.31
  -3   4   9   53.34   10.86
  -3   4   9   68.87   11.93
  -3   4  10  148.78   18.93
  -3   4  10  162.90   16.96
  -3   4  10  158.68   18.70
  -3   4  11  547.87   39.47
  -3   4  11  552.41   38.24
  -3   4  12  447.89   36.22
  -3   4  12  483.69   40.01
  -3   4  13  496.25   41.88
  -3   4  13  567.44   37.55
  -3   4  14  135.83   20.92
  -3   4  14  127.39   16.86
  -3   4  15  715.32   43.36
  -3   4  15  692.84   50.99
  -3   4  16   73.30   16.24
  -3   4  16   92.69   13.54
  -3   4  17  374.42   35.33
  -3   4  17  405.69   29.89
  -3   4  18   20.72    8.81
  -3   4  19  292.28   28.10
  -3   4  20   18.55    6.29
  -3   4  21  305.74   23.84
  -3   5  -7  721.78   51.48
  -3   5  -6  487.62   41.72
  -3   5  -5  159.48   22.88
  -3   5  -4  624.25   46.71
  -3   5  -3  383.60   34.81
  -3   5  -2  573.59   43.28
  -3   5  -1  180.29   22.34
  -3   5   0 1131.02   62.99
  -3   5   1  439.99   35.40
  -3   5   2 1352.49   69.35
  -3   5   3   71.28   13.54
  -3   5   4  675.43   44.78
  -3   5   5    9.91    5.36
  -3   5   6  664.16   44.56
  -3   5   6  665.05   42.17
  -3   5   7   -2.03    4.91
  -3   5   7    5.49    4.77
  -3   5   8  462.89   34.86
  -3   5   9  107.54   16.34
  -3   5   9  108.85   14.88
  -3   5   9   92.82   15.46
  -3   5  10  316.72   29.23
  -3   5  10  334.73   27.23
  -3   5  10  338.46   29.65
  -3   5  11  403.78   33.75
  -3   5  11  384.78   32.75
  -3   5  12  365.87   31.92
  -3   5  13  331.75   33.92
  -3   5  14  308.02   27.26
  -3   5  14  229.45   28.61
  -3   5  15  571.26   38.82
  -3   5  15  630.21   47.92
  -3   5  16  239.29   28.16
  -3   5  16  254.06   23.45
  -3   5  17  320.74   31.78
  -3   5  17  304.99   25.21
  -3   5  18   18.51    8.24
  -3   5  19  533.37   37.94
  -3   5  20    8.05    3.35
  -3   6  -6   11.34    7.01
  -3   6  -5  147.94   22.77
  -3   6  -4  229.43   28.48
  -3   6  -3  290.13   31.99
  -3   6  -2  158.35   23.25
  -3   6  -1  346.69   34.46
  -3   6   0  553.72   43.71
  -3   6   1  760.75   52.16
  -3   6   1  798.56   50.46
  -3   6   2  776.03   52.08
  -3   6   2  804.15   50.95
  -3   6   3  503.89   40.34
  -3   6   3  540.61   40.29
  -3   6   4  632.19   46.58
  -3   6   4  760.98   55.70
  -3   6   4  751.68   48.10
  -3   6   5   51.25   12.08
  -3   6   5   52.68   14.67
  -3   6   5   64.64   12.97
  -3   6   6  608.63   45.28
  -3   6   6  727.82   51.59
  -3   6   6  697.67   46.14
  -3   6   7   28.30    9.48
  -3   6   7   23.07    9.01
  -3   6   7   35.44   10.15
  -3   6   8 1038.39   74.50
  -3   6   8 1153.88   62.99
  -3   6   9   47.45   15.50
  -3   6   9   39.57    9.99
  -3   6   9   49.54   10.98
  -3   6   9   45.28   11.86
  -3   6  10  471.67   35.66
  -3   6  10  479.70   37.94
  -3   6  11  267.44   27.75
  -3   6  12  629.82   44.79
  -3   6  13  251.69   29.90
  -3   6  13  225.37   25.34
  -3   6  14  318.03   28.38
  -3   6  14  321.97   33.69
  -3   6  15  286.47   25.75
  -3   6  15  280.30   30.89
  -3   6  16  266.36   29.79
  -3   6  16  284.45   24.85
  -3   6  17  312.34   24.72
  -3   6  17  310.58   30.00
  -3   6  18   38.77    9.74
  -3   6  19  313.20   26.31
  -3   6  20   20.60    5.71
  -3   7  -1  322.11   34.59
  -3   7  -1  369.80   33.65
  -3   7   0  134.39   21.84
  -3   7   0  129.35   19.48
  -3   7   1  398.87   37.91
  -3   7   1  405.73   35.71
  -3   7   2  208.57   26.50
  -3   7   2  239.71   27.04
  -3   7   3  141.37   21.13
  -3   7   3  152.40   21.05
  -3   7   4  470.66   40.91
  -3   7   4  548.24   47.49
  -3   7   4  565.60   42.59
  -3   7   5  167.26   28.65
  -3   7   5  157.73   22.67
  -3   7   5  133.02   22.36
  -3   7   5  174.73   22.97
  -3   7   6  439.89   46.47
  -3   7   6  333.59   35.53
  -3   7   6  447.57   37.34
  -3   7   7    5.75    4.60
  -3   7   8  507.31   40.72
  -3   7   9    2.66    4.80
  -3   7  10  582.10   43.66
  -3   7  11   48.73   11.66
  -3   7  12  606.61   44.37
  -3   7  13   43.39   12.94
  -3   7  13   61.85   13.07
  -3   7  14  255.10   29.37
  -3   7  15  115.64   18.58
  -3   7  15  134.38   16.57
  -3   7  16  252.40   22.38
  -3   7  16  259.35   27.20
  -3   7  17  215.12   18.82
  -3   7  17  266.30   25.67
  -3   7  18   45.29    9.59
  -3   7  19  256.18   20.98
  -3   8 -11  336.73   21.77
  -3   8  -3  409.03   34.21
  -3   8  -2   15.61    7.09
  -3   8  -1  324.60   31.16
  -3   8   0  196.29   23.98
  -3   8   1  378.37   34.27
  -3   8   2  182.88   23.71
  -3   8   3  145.52   23.64
  -3   8   3  181.76   23.43
  -3   8   4  333.61   36.44
  -3   8   4  416.57   36.25
  -3   8   5   36.36   12.14
  -3   8   5   48.78   12.76
  -3   8   6  382.36   35.22
  -3   8   7   15.22    6.44
  -3   8   8  594.73   44.71
  -3   8   9   12.11    4.97
  -3   8  10  504.16   40.08
  -3   8  11   13.02    4.98
  -3   8  12  416.82   34.52
  -3   8  13   56.27   13.34
  -3   8  13   35.23    8.71
  -3   8  14  251.61   27.30
  -3   8  15   61.51   12.94
  -3   8  15   50.17    9.41
  -3   8  16  261.92   20.20
  -3   8  16  202.10   22.01
  -3   8  17  174.63   18.59
  -3   8  18   49.61    8.43
  -3   9  -9  125.30   11.58
  -3   9  -8   27.00    6.19
  -3   9  -7  312.63   23.12
  -3   9  -6   37.06    8.10
  -3   9  -5  328.79   26.34
  -3   9  -4   -3.94    3.40
  -3   9  -3  591.48   39.13
  -3   9  -2   -3.01    4.13
  -3   9  -1  483.86   36.08
  -3   9   0   11.93    4.82
  -3   9   1  321.89   34.01
  -3   9   1  316.27   29.37
  -3   9   2  119.83   20.36
  -3   9   2  135.69   18.87
  -3   9   3  141.28   21.56
  -3   9   3  236.99   25.34
  -3   9   4  344.92   33.62
  -3   9   4  307.39   29.89
  -3   9   5  179.05   22.56
  -3   9   5  147.62   20.16
  -3   9   6  432.23   35.77
  -3   9   7    6.39    4.67
  -3   9   8  342.82   31.02
  -3   9   9   12.46    8.12
  -3   9  10  443.87   34.88
  -3   9  11    8.18    5.55
  -3   9  12  342.54   28.38
  -3   9  13    2.38    3.17
  -3   9  14  168.70   16.53
  -3   9  14  226.97   22.70
  -3   9  15   98.33   13.80
  -3   9  15   73.95    9.58
  -3   9  16  237.45   20.02
  -3  10  -6   51.59    9.27
  -3  10  -5  170.49   18.28
  -3  10  -5  184.80   15.32
  -3  10  -4   28.48    7.84
  -3  10  -4   13.20    3.65
  -3  10  -3  323.42   27.71
  -3  10  -3  308.47   22.92
  -3  10  -2   10.99    6.68
  -3  10  -2    0.95    2.60
  -3  10  -1  328.40   29.32
  -3  10  -1  362.38   26.52
  -3  10   0   40.78    9.80
  -3  10   0   44.39    9.08
  -3  10   1  301.89   27.80
  -3  10   1  316.97   26.06
  -3  10   2   35.68    8.27
  -3  10   2   46.99    9.68
  -3  10   3  349.80   29.17
  -3  10   3  403.69   30.05
  -3  10   4  204.95   21.34
  -3  10   5   67.93   11.78
  -3  10   6  281.99   25.03
  -3  10   7   15.69    5.29
  -3  10   8  191.88   19.83
  -3  10   9   45.11    9.34
  -3  10  10  306.98   24.45
  -3  10  11   49.74    9.17
  -3  10  12  447.35   31.17
  -3  10  13   16.01    5.69
  -3  10  14   82.78   10.54
  -3  11   0    0.34    2.11
  -3  11   1  276.71   19.04
  -3  11   2   30.34    5.93
  -3  11   3  348.69   22.78
  -3  11   4   69.68    9.58
  -3  11   5  108.22   12.22
  -3  11   6   49.38    8.21
  -3  11   7   46.88    7.74
  -3  11   8   38.29    6.89
  -3  11   9  321.61   20.38
  -3  11  10  109.86   12.05
  -2 -12  -3    4.58    4.10
  -2 -12  -2  338.55   23.18
  -2 -12  -1   17.79    4.90
  -2 -12   0  392.76   25.20
  -2 -12   1  133.33   13.44
  -2 -12   2  176.96   15.24
  -2 -12   3   78.33    9.44
  -2 -12   4  198.84   14.73
  -2 -11  -5  183.69   18.82
  -2 -11  -4  324.35   26.38
  -2 -11  -3   54.67   10.23
  -2 -11  -2  355.79   28.65
  -2 -11  -1    0.96    3.16
  -2 -11   0  332.75   27.53
  -2 -11   1    0.71    3.55
  -2 -11   2  417.15   30.70
  -2 -11   3   54.02   10.06
  -2 -11   4  288.98   23.27
  -2 -11   5   76.81   11.07
  -2 -11   6  278.37   20.81
  -2 -11   7  171.15   14.70
  -2 -11   8  124.84   11.01
  -2 -10  -2  466.49   36.68
  -2 -10  -1  154.34   20.08
  -2 -10   0  289.66   28.49
  -2 -10   1   12.11    5.67
  -2 -10   2  373.06   32.22
  -2 -10   3   -3.02    4.89
  -2 -10   4  576.92   39.95
  -2 -10   5   55.65   10.88
  -2 -10   6  299.38   25.92
  -2 -10   7   86.92   12.98
  -2 -10   8  293.75   22.76
  -2 -10   9  117.46   12.70
  -2 -10  10  177.46   14.14
  -2  -9   2  727.66   49.38
  -2  -9   3    9.82    5.70
  -2  -9   4  713.31   47.96
  -2  -9   5   57.16   12.13
  -2  -9   6  445.56   35.23
  -2  -9   7   59.25   11.59
  -2  -9   8  326.98   27.93
  -2  -9   9   74.87   12.31
  -2  -9  10  221.83   19.95
  -2  -9  11  214.79   17.66
  -2  -9  12  116.13   10.89
  -2  -8   4 1414.31   74.10
  -2  -8   5    6.79    4.86
  -2  -8   6  481.80   38.06
  -2  -8   7   44.09   11.12
  -2  -8   8  304.71   28.68
  -2  -8   9   21.06    7.28
  -2  -8  10  422.42   32.01
  -2  -8  11  148.73   15.75
  -2  -8  11  147.46   16.98
  -2  -8  12  215.76   17.99
  -2  -8  12  227.07   19.29
  -2  -8  13  294.75   19.70
  -2  -8  13  292.93   19.58
  -2  -7   2 1202.06   57.34
  -2  -7   3   72.36   11.90
  -2  -7   4 1562.51   73.52
  -2  -7   5   23.12    8.27
  -2  -7   5   21.74    8.19
  -2  -7   6  874.60   54.47
  -2  -7   6  935.94   55.99
  -2  -7   7    8.25    6.61
  -2  -7   7    4.01    4.87
  -2  -7   8  415.26   33.24
  -2  -7   8  390.84   33.52
  -2  -7   9   11.96    6.56
  -2  -7   9   17.54    6.33
  -2  -7  10  367.93   30.83
  -2  -7  10  342.15   30.19
  -2  -7  11  172.34   19.82
  -2  -7  11  167.77   19.69
  -2  -7  12  330.83   26.69
  -2  -7  12  211.53   21.26
  -2  -7  13   90.79   13.06
  -2  -7  13   83.26   11.46
  -2  -7  14   87.87   12.11
  -2  -7  15  196.09   16.61
  -2  -7  16   90.13    9.42
  -2  -6   0  905.75   41.78
  -2  -6   1  176.12   16.34
  -2  -6   2  961.56   47.77
  -2  -6   3  786.47   43.85
  -2  -6   4 1879.54   82.19
  -2  -6   5   10.01    4.17
  -2  -6   5    2.20    6.04
  -2  -6   6  515.19   38.69
  -2  -6   6  464.68   39.61
  -2  -6   7  -14.52    6.99
  -2  -6   7   -4.63    5.34
  -2  -6   8 1282.25   71.55
  -2  -6   8 1241.24   73.63
  -2  -6   8 1269.35   66.80
  -2  -6   9  242.79   28.53
  -2  -6   9  248.99   30.52
  -2  -6   9  235.25   24.96
  -2  -6  10  265.03   31.34
  -2  -6  10  163.22   20.73
  -2  -6  11   32.30    9.47
  -2  -6  11   26.84   10.67
  -2  -6  11   33.64    9.47
  -2  -6  12  384.68   33.21
  -2  -6  12  404.90   39.50
  -2  -6  12  418.35   31.70
  -2  -6  13  106.60   18.77
  -2  -6  13   88.91   14.75
  -2  -6  14  363.16   29.84
  -2  -6  15   61.91   11.00
  -2  -6  16  333.51   24.66
  -2  -6  17  149.48   13.92
  -2  -5  -2  846.99   34.24
  -2  -5  -1 1439.61   54.21
  -2  -5   0   28.35    5.54
  -2  -5   1 1403.99   57.63
  -2  -5   2  202.03   17.74
  -2  -5   3   34.08    7.55
  -2  -5   4  386.86   28.75
  -2  -5   5  666.24   41.68
  -2  -5   6  686.17   44.44
  -2  -5   7   33.84    9.78
  -2  -5   7   36.40   11.23
  -2  -5   8 1077.55   62.45
  -2  -5   8  949.40   61.69
  -2  -5   8 1010.05   56.15
  -2  -5   9   55.62   13.05
  -2  -5   9   56.99   14.43
  -2  -5   9   46.50   10.61
  -2  -5  10  665.21   49.35
  -2  -5  10  631.64   49.68
  -2  -5  11   93.64   18.56
  -2  -5  11   77.83   13.68
  -2  -5  12  450.25   42.86
  -2  -5  13   74.11   16.88
  -2  -5  13   55.17   12.66
  -2  -5  14  513.68   39.57
  -2  -5  14  539.15   45.62
  -2  -5  15  246.30   25.42
  -2  -5  15  226.75   27.80
  -2  -5  16  463.65   33.80
  -2  -5  16  467.95   37.74
  -2  -5  17  105.52   13.83
  -2  -5  18  196.82   17.30
  -2  -5  19  291.09   18.40
  -2  -4  -2  177.87   10.93
  -2  -4  -1 3071.58   99.75
  -2  -4   0  292.65   17.74
  -2  -4   1  338.21   20.60
  -2  -4   2   28.85    6.01
  -2  -4   3  701.08   36.56
  -2  -4   4  268.66   21.77
  -2  -4   5  325.69   25.76
  -2  -4   6  474.44   33.68
  -2  -4   7  409.10   32.62
  -2  -4   8 1190.56   64.84
  -2  -4   9  114.93   18.89
  -2  -4   9  105.30   17.98
  -2  -4   9  121.24   18.78
  -2  -4  10  796.62   56.53
  -2  -4  10  927.37   58.76
  -2  -4  11    2.81    4.66
  -2  -4  11  -13.91    7.46
  -2  -4  12 1919.72   99.36
  -2  -4  12 1835.55   96.15
  -2  -4  13  138.43   23.89
  -2  -4  14  665.18   47.79
  -2  -4  14  631.95   52.11
  -2  -4  15   87.95   18.11
  -2  -4  15   69.22   14.28
  -2  -4  16  597.38   41.97
  -2  -4  16  563.97   45.72
  -2  -4  17   89.67   15.93
  -2  -4  17   91.11   14.94
  -2  -4  18  123.31   15.37
  -2  -4  18  105.38   15.41
  -2  -4  19  263.02   20.32
  -2  -4  20  160.98   13.08
  -2  -3  -3 2564.30   76.74
  -2  -3  -2   35.41    3.86
  -2  -3  -1 2763.48   87.72
  -2  -3   0   21.06    3.75
  -2  -3   1 2385.98   80.45
  -2  -3   2  384.11   21.31
  -2  -3   3  857.62   38.67
  -2  -3   4  769.24   37.68
  -2  -3   5 1151.88   52.18
  -2  -3   6  827.72   43.48
  -2  -3   7  302.89   25.20
  -2  -3   8  510.13   35.97
  -2  -3   9  178.60   21.18
  -2  -3  10 1010.75   62.40
  -2  -3  10 1211.79   67.06
  -2  -3  10 1110.12   63.18
  -2  -3  11   56.08   13.00
  -2  -3  11   46.55   12.27
  -2  -3  11   45.44   12.02
  -2  -3  12  912.27   61.83
  -2  -3  12  967.23   61.83
  -2  -3  13   87.14   18.11
  -2  -3  13   75.31   16.33
  -2  -3  14  677.08   53.67
  -2  -3  15   88.50   19.24
  -2  -3  15   83.21   16.47
  -2  -3  16  707.57   48.80
  -2  -3  16  693.30   53.64
  -2  -3  17    2.63    3.98
  -2  -3  17    1.02    5.47
  -2  -3  18  202.27   21.57
  -2  -3  18  186.52   23.14
  -2  -3  19  309.66   24.80
  -2  -3  19  307.76   26.90
  -2  -3  20  129.41   13.56
  -2  -2 -10 2269.44   79.00
  -2  -2  -3  891.38   27.71
  -2  -2  -2 1084.89   35.28
  -2  -2  -1 1944.39   61.78
  -2  -2   0   99.89    7.32
  -2  -2   1 1667.24   57.04
  -2  -2   2   35.01    5.31
  -2  -2   3 1236.92   47.92
  -2  -2   4  302.87   19.28
  -2  -2   5  743.35   36.02
  -2  -2   6 1163.77   51.55
  -2  -2   7  596.69   34.54
  -2  -2   8 1078.53   53.07
  -2  -2   9  227.27   22.24
  -2  -2  10  895.95   51.96
  -2  -2  11  336.62   31.63
  -2  -2  11  286.50   28.66
  -2  -2  12 1048.69   59.15
  -2  -2  12 1213.29   68.95
  -2  -2  12 1213.39   68.82
  -2  -2  12 1215.71   67.40
  -2  -2  13   14.80    5.62
  -2  -2  13    8.85    5.32
  -2  -2  13   31.05   10.42
  -2  -2  13   29.65   10.63
  -2  -2  14  517.08   45.18
  -2  -2  14  526.23   39.99
  -2  -2  14  546.21   45.30
  -2  -2  15   18.04    9.26
  -2  -2  15    8.85    4.38
  -2  -2  16  935.20   59.15
  -2  -2  16  910.11   63.15
  -2  -2  17    2.04    3.92
  -2  -2  17    3.25    3.16
  -2  -2  18  178.52   21.62
  -2  -2  18  182.84   24.33
  -2  -2  19   89.36   15.14
  -2  -2  19   82.61   13.35
  -2  -2  20  177.57   17.39
  -2  -2  20  186.02   19.52
  -2  -2  21   52.32    7.59
  -2  -1 -10 1695.98   61.95
  -2  -1  -9  418.97   21.98
  -2  -1  -8 1631.84   58.65
  -2  -1  -7 1301.77   48.15
  -2  -1   1 3666.67  114.00
  -2  -1   2  672.38   27.81
  -2  -1   3  801.59   33.28
  -2  -1   4  447.13   23.12
  -2  -1   4  443.75   17.66
  -2  -1   5 2160.74   66.76
  -2  -1   5 2138.15   77.31
  -2  -1   6  796.76   37.84
  -2  -1   7 1233.51   53.46
  -2  -1   8  733.60   39.23
  -2  -1   9  191.88   18.81
  -2  -1  10 1653.87   73.98
  -2  -1  11  466.85   34.73
  -2  -1  12  712.98   49.25
  -2  -1  12  810.51   51.46
  -2  -1  12  779.43   49.17
  -2  -1  13  288.12   30.53
  -2  -1  13  247.88   24.79
  -2  -1  13  305.58   30.84
  -2  -1  13  254.75   27.95
  -2  -1  14  775.70   53.83
  -2  -1  14  670.00   44.81
  -2  -1  14  700.72   50.64
  -2  -1  15   16.86    8.62
  -2  -1  15   14.44    5.50
  -2  -1  16  764.73   55.71
  -2  -1  16  724.67   47.94
  -2  -1  17    8.40    7.80
  -2  -1  17   20.42    7.69
  -2  -1  17   10.57    5.96
  -2  -1  18  117.58   17.95
  -2  -1  18  111.30   19.28
  -2  -1  19   60.09   13.67
  -2  -1  19   71.90   12.87
  -2  -1  20  232.86   20.84
  -2  -1  20  232.71   23.95
  -2  -1  21   15.19    3.99
  -2  -1  21   21.86    6.33
  -2  -1  22  158.00   13.07
  -2   0  -9   16.45    3.96
  -2   0  -8 2065.66   72.79
  -2   0  -7  176.78   12.84
  -2   0  -6  878.90   35.70
  -2   0  -5 2524.42   83.52
  -2   0  -4  143.69   10.26
  -2   0  -3 1441.25   50.53
  -2   0  -2  929.41   34.83
  -2   0  -1   30.89    4.14
  -2   0   0 2357.69   75.67
  -2   0   1 2816.12   88.62
  -2   0   2  188.59   10.56
  -2   0   3 2512.30   82.47
  -2   0   3 2540.74   78.48
  -2   0   3 2437.51   75.36
  -2   0   4    2.40    0.94
  -2   0   4    3.72    2.31
  -2   0   5 2315.95   73.33
  -2   0   5 2287.11   80.52
  -2   0   6   44.71    4.22
  -2   0   6   38.95    6.57
  -2   0   7 3559.24  121.55
  -2   0   8  544.52   31.40
  -2   0   9  512.50   31.63
  -2   0  10  782.53   43.23
  -2   0  11  913.45   49.74
  -2   0  12 1190.37   65.10
  -2   0  12 1246.64   63.04
  -2   0  13  683.35   42.02
  -2   0  13  663.62   47.32
  -2   0  13  694.26   45.92
  -2   0  14  395.81   36.36
  -2   0  14  367.30   30.61
  -2   0  14  406.18   35.25
  -2   0  15   51.63   12.17
  -2   0  15   38.93    9.95
  -2   0  15   57.05   14.84
  -2   0  16  644.25   49.54
  -2   0  16  614.85   42.46
  -2   0  17   53.35   14.19
  -2   0  17   46.34   10.18
  -2   0  17   43.99   12.18
  -2   0  18  414.62   37.89
  -2   0  18  341.64   29.48
  -2   0  19   24.39    9.32
  -2   0  19   33.99    9.16
  -2   0  19   22.29    7.47
  -2   0  20  502.81   31.90
  -2   0  20  479.60   37.46
  -2   0  21   19.31    7.00
  -2   1  -9   69.77    9.13
  -2   1  -8 1591.94   61.91
  -2   1  -7 1411.13   55.45
  -2   1  -6 2454.82   85.46
  -2   1  -5  416.25   22.35
  -2   1  -4 1351.21   50.81
  -2   1  -3  380.44   20.02
  -2   1  -2  613.52   27.08
  -2   1  -1  664.78   28.22
  -2   1   0  181.41   11.85
  -2   1   1 5396.48  165.63
  -2   1   2  533.59   23.51
  -2   1   3 7023.94  213.00
  -2   1   4  849.55   34.01
  -2   1   5 4935.47  150.84
  -2   1   5 4742.85  153.14
  -2   1   5 4753.91  147.15
  -2   1   6   24.75    4.19
  -2   1   6   22.15    5.07
  -2   1   6   19.57    3.31
  -2   1   7 1881.29   65.14
  -2   1   7 1931.42   72.16
  -2   1   8  803.16   39.79
  -2   1   9 1590.66   66.42
  -2   1  10  270.75   22.47
  -2   1  11  571.74   36.34
  -2   1  12   94.06   15.67
  -2   1  12   81.10   12.85
  -2   1  13  777.83   50.81
  -2   1  13  763.20   44.67
  -2   1  13  828.41   48.98
  -2   1  14  287.95   26.11
  -2   1  14  307.99   31.04
  -2   1  14  292.40   28.73
  -2   1  15   66.25   12.47
  -2   1  15   52.08   12.88
  -2   1  15   56.25   13.07
  -2   1  16  756.56   50.18
  -2   1  16  847.71   56.43
  -2   1  16  732.48   46.61
  -2   1  17  227.49   28.36
  -2   1  17  242.00   24.85
  -2   1  18  540.97   43.80
  -2   1  18  485.16   36.37
  -2   1  19   -2.20    4.31
  -2   1  19   12.81    5.23
  -2   1  20  598.20   42.70
  -2   1  20  593.28   37.04
  -2   1  21   15.62    6.54
  -2   2  -8 1529.41   64.33
  -2   2  -7  152.94   15.02
  -2   2  -6 4842.48  160.28
  -2   2  -5  449.81   26.57
  -2   2  -4 4060.30  135.06
  -2   2  -3  347.97   21.53
  -2   2  -2 2664.12   92.39
  -2   2  -1 1050.36   43.47
  -2   2   0 1046.61   43.25
  -2   2   1 1098.22   44.68
  -2   2   2 1019.54   42.19
  -2   2   3  375.87   21.78
  -2   2   4  654.40   31.76
  -2   2   5 2629.29   92.21
  -2   2   6   14.78    4.27
  -2   2   7 4120.82  129.65
  -2   2   7 3870.17  131.75
  -2   2   7 3810.01  126.54
  -2   2   8  664.06   34.92
  -2   2   8  653.05   30.81
  -2   2   9  375.64   25.62
  -2   2   9  361.44   21.81
  -2   2  10    6.53    3.17
  -2   2  11  444.81   31.09
  -2   2  12  553.70   37.03
  -2   2  12  596.29   41.57
  -2   2  13  369.99   30.06
  -2   2  13  313.74   26.60
  -2   2  13  354.69   32.41
  -2   2  14  139.01   19.15
  -2   2  14  147.66   21.24
  -2   2  14  127.51   17.15
  -2   2  15   77.59   15.62
  -2   2  15  100.09   15.03
  -2   2  16  497.84   41.79
  -2   2  16  465.33   35.24
  -2   2  17  102.49   15.49
  -2   2  17  114.46   19.45
  -2   2  18  584.71   45.51
  -2   2  18  574.02   39.53
  -2   2  19   50.50   11.67
  -2   2  19   32.06    8.57
  -2   2  20  600.76   42.20
  -2   2  20  538.29   35.72
  -2   2  21   10.37    4.39
  -2   2  21    5.59    2.39
  -2   2  22  221.57   17.06
  -2   3  -8 1116.09   55.31
  -2   3  -7   -2.74    2.95
  -2   3  -6 4202.46  147.61
  -2   3  -5  158.68   16.77
  -2   3  -4 1923.32   77.79
  -2   3  -3 1364.46   59.57
  -2   3  -2 2280.61   86.73
  -2   3  -1 1271.28   55.37
  -2   3   0 1022.64   46.85
  -2   3   1  798.06   39.31
  -2   3   2  183.07   16.35
  -2   3   3 1396.93   58.63
  -2   3   4  789.46   39.58
  -2   3   5 1113.44   50.85
  -2   3   6   39.57    7.72
  -2   3   7  648.92   35.15
  -2   3   8   36.65    6.80
  -2   3   8   33.29    6.63
  -2   3   8   34.05    6.82
  -2   3   9 1410.46   61.06
  -2   3   9 1367.72   56.95
  -2   3  10   24.04    6.81
  -2   3  10   20.20    5.41
  -2   3  11  517.05   34.14
  -2   3  12  179.20   19.62
  -2   3  12  199.49   23.25
  -2   3  13  837.29   48.27
  -2   3  13  767.74   45.97
  -2   3  13  798.06   51.92
  -2   3  14  236.84   23.61
  -2   3  14  257.61   28.20
  -2   3  15  121.41   19.53
  -2   3  15  115.37   16.28
  -2   3  16  299.00   27.51
  -2   3  16  315.07   32.44
  -2   3  17   96.87   15.44
  -2   3  17   86.45   16.83
  -2   3  18  347.11   33.41
  -2   3  18  309.74   27.73
  -2   3  19    3.26    4.32
  -2   3  19   11.78    6.09
  -2   3  20  642.52   44.04
  -2   3  20  677.10   40.13
  -2   3  21  114.43   15.44
  -2   3  21   95.79   12.44
  -2   3  21   88.62   11.09
  -2   4  -7   10.15    5.22
  -2   4  -6 3345.29  127.83
  -2   4  -5  401.54   31.11
  -2   4  -4  150.72   17.93
  -2   4  -3  614.97   38.79
  -2   4  -2  503.05   33.97
  -2   4  -1   72.56   11.74
  -2   4   0  780.44   42.90
  -2   4   1 1197.87   56.87
  -2   4   2  356.57   26.44
  -2   4   3  426.05   29.50
  -2   4   4  832.58   44.75
  -2   4   5  522.03   33.66
  -2   4   6  386.56   28.43
  -2   4   7  704.44   40.93
  -2   4   8  161.19   15.79
  -2   4   8  149.62   17.02
  -2   4   9  451.36   29.86
  -2   4   9  428.27   28.07
  -2   4   9  431.92   36.99
  -2   4  10    0.15    2.46
  -2   4  10    5.73    3.67
  -2   4  11 1146.49   56.97
  -2   4  11 1095.92   53.44
  -2   4  11 1095.10   57.52
  -2   4  12  199.28   21.69
  -2   4  13 1011.47   61.02
  -2   4  14   38.67   11.39
  -2   4  14   36.47   10.17
  -2   4  15  293.76   27.42
  -2   4  15  324.71   32.73
  -2   4  16  626.80   42.43
  -2   4  16  673.54   49.04
  -2   4  17  183.57   21.03
  -2   4  17  187.26   24.68
  -2   4  18  344.97   32.73
  -2   4  18  340.59   28.90
  -2   4  19   78.56   12.92
  -2   4  19   88.07   15.81
  -2   4  20  585.04   40.53
  -2   4  20  640.03   37.87
  -2   4  21   94.99   13.80
  -2   4  21   83.07   11.36
  -2   5  -7    1.23    4.63
  -2   5  -6 1129.23   62.08
  -2   5  -5    9.28    5.13
  -2   5  -4   62.43   12.69
  -2   5  -3   -1.96    3.39
  -2   5  -2 1125.97   60.53
  -2   5  -1    6.46    4.80
  -2   5   0 1220.00   62.34
  -2   5   1  278.31   25.53
  -2   5   2  534.72   36.87
  -2   5   3  740.44   44.53
  -2   5   4  484.78   34.54
  -2   5   5  581.95   38.85
  -2   5   6  181.08   20.54
  -2   5   7  725.07   44.75
  -2   5   8   58.52   13.95
  -2   5   9 1100.11   53.39
  -2   5   9 1031.51   52.15
  -2   5   9 1069.86   55.75
  -2   5  10   22.46    6.96
  -2   5  10   20.74    7.02
  -2   5  10   18.22    5.37
  -2   5  11  542.71   35.96
  -2   5  11  506.49   37.76
  -2   5  12   19.32    6.11
  -2   5  12   13.95    7.34
  -2   5  13 1153.92   63.17
  -2   5  14   22.58    8.40
  -2   5  15  550.22   39.66
  -2   5  15  538.01   43.83
  -2   5  16  303.32   27.81
  -2   5  16  247.98   28.97
  -2   5  17  436.49   38.42
  -2   5  17  437.21   33.99
  -2   5  18  259.66   27.82
  -2   5  18  258.60   24.40
  -2   5  19  383.33   32.34
  -2   5  19  336.92   27.19
  -2   5  20  361.49   29.22
  -2   5  20  341.16   25.58
  -2   5  21  178.58   18.00
  -2   5  21  194.21   16.77
  -2   6  -6  933.59   57.71
  -2   6  -5    7.14    6.84
  -2   6  -4  188.64   23.98
  -2   6  -3   58.38   13.16
  -2   6  -2 1291.55   70.09
  -2   6  -1   12.38    5.09
  -2   6   0 1040.35   59.96
  -2   6   1   66.32   13.37
  -2   6   2 1161.08   63.31
  -2   6   3    1.68    3.85
  -2   6   4  275.05   27.43
  -2   6   5  553.75   40.72
  -2   6   5  610.61   40.89
  -2   6   6  300.64   29.06
  -2   6   6  328.84   28.95
  -2   6   7  986.57   68.80
  -2   6   7 1051.90   57.72
  -2   6   8  116.72   21.67
  -2   6   8  166.85   20.51
  -2   6   9  825.59   47.44
  -2   6   9  773.83   48.39
  -2   6  10   52.75   11.17
  -2   6  10   56.67   12.70
  -2   6  11  658.60   43.24
  -2   6  11  680.55   46.01
  -2   6  12    7.45    5.29
  -2   6  12   14.06    4.78
  -2   6  13  821.21   52.50
  -2   6  14   -6.62    7.27
  -2   6  15  579.22   41.57
  -2   6  15  596.44   46.53
  -2   6  16   84.89   16.77
  -2   6  16   96.53   15.75
  -2   6  17  359.93   30.00
  -2   6  17  393.30   35.06
  -2   6  18   31.81    9.35
  -2   6  18   37.45    8.64
  -2   6  19  262.08   24.94
  -2   6  19  256.45   22.38
  -2   6  20  165.16   17.84
  -2   6  20  170.37   16.28
  -2   7  -5  143.80   22.31
  -2   7  -4  281.41   31.12
  -2   7  -4  324.27   38.50
  -2   7  -3   52.35   16.88
  -2   7  -3   39.56   11.85
  -2   7  -2 1030.75   73.80
  -2   7  -2  994.45   63.38
  -2   7  -1   29.95   10.51
  -2   7  -1   56.91   17.34
  -2   7   0  600.93   46.00
  -2   7   1   15.35    8.13
  -2   7   2  630.07   47.19
  -2   7   2  665.77   57.33
  -2   7   2  743.77   48.40
  -2   7   3  115.91   22.82
  -2   7   3  105.34   17.49
  -2   7   3  124.03   18.56
  -2   7   4  673.15   56.94
  -2   7   4  620.86   45.80
  -2   7   4  636.11   44.96
  -2   7   5  237.20   32.46
  -2   7   5  249.47   26.70
  -2   7   6  481.89   48.20
  -2   7   6  513.71   40.10
  -2   7   7  446.14   46.65
  -2   7   7  490.99   39.07
  -2   7   8  250.20   34.44
  -2   7   8  242.00   26.68
  -2   7   9 1130.16   62.57
  -2   7   9 1105.71   77.74
  -2   7   9 1136.22   64.67
  -2   7  10    1.62    3.36
  -2   7  11  410.35   35.99
  -2   7  12   13.13    6.34
  -2   7  13  622.77   45.23
  -2   7  14   11.67    6.39
  -2   7  15  635.01   47.56
  -2   7  16   -7.50    5.39
  -2   7  16   17.30    6.25
  -2   7  17  402.37   30.85
  -2   7  17  426.73   35.13
  -2   7  18   33.87    9.07
  -2   7  18   37.66    8.73
  -2   7  19  195.92   19.68
  -2   7  19  178.54   17.04
  -2   7  20  108.16   12.64
  -2   7  20  105.32   11.29
  -2   8   0  742.91   50.49
  -2   8   1    7.49    9.70
  -2   8   1    1.36    3.41
  -2   8   2 1063.45   77.94
  -2   8   2 1053.50   62.71
  -2   8   3   34.01   14.58
  -2   8   3   40.44   11.01
  -2   8   4  623.32   57.59
  -2   8   4  675.95   48.26
  -2   8   5   21.26    7.94
  -2   8   6 1004.22   61.40
  -2   8   7  352.88   33.96
  -2   8   8  173.97   22.79
  -2   8   9  664.77   48.26
  -2   8  10    9.25    5.47
  -2   8  11  304.09   30.96
  -2   8  12    7.24    5.13
  -2   8  13  372.52   33.14
  -2   8  14   51.10   11.83
  -2   8  15  478.18   38.99
  -2   8  16    5.05    3.47
  -2   8  16    4.77    3.63
  -2   8  17  384.43   27.99
  -2   8  17  398.72   31.38
  -2   8  18    7.47    3.80
  -2   8  18    0.16    2.31
  -2   8  19  252.14   19.78
  -2   8  19  247.61   17.92
  -2   9 -11  151.41   12.74
  -2   9  -3   98.52   16.25
  -2   9  -2  399.16   34.04
  -2   9  -1   58.86   12.57
  -2   9   0  542.57   41.18
  -2   9   1  -12.39    6.66
  -2   9   2  537.49   41.70
  -2   9   3    0.20    4.05
  -2   9   4  544.53   42.06
  -2   9   5   24.32    8.69
  -2   9   6  538.97   42.32
  -2   9   7  224.94   26.38
  -2   9   8  227.97   26.48
  -2   9   9  352.09   33.03
  -2   9  10  136.99   19.97
  -2   9  11    4.36    5.60
  -2   9  12   90.49   15.23
  -2   9  13  200.90   22.34
  -2   9  14   38.20   10.43
  -2   9  15  431.91   30.63
  -2   9  15  432.30   33.66
  -2   9  16   33.22    8.18
  -2   9  16   25.11    6.13
  -2   9  17  272.07   20.12
  -2   9  17  277.45   22.26
  -2  10  -8   11.01    4.01
  -2  10  -7  239.05   18.72
  -2  10  -6  141.94   14.99
  -2  10  -5  245.53   21.28
  -2  10  -4  215.47   20.80
  -2  10  -3  120.11   15.78
  -2  10  -2  363.30   29.13
  -2  10  -1   53.66   10.89
  -2  10   0  462.07   34.90
  -2  10   1   40.05    9.98
  -2  10   2  366.36   32.80
  -2  10   2  377.36   31.43
  -2  10   3   -5.00    6.63
  -2  10   4  314.28   29.22
  -2  10   5    0.72    5.43
  -2  10   6  687.15   45.24
  -2  10   7   44.24    9.69
  -2  10   8  287.95   27.32
  -2  10   9   20.50    6.71
  -2  10  10  463.17   34.54
  -2  10  11   16.09    7.12
  -2  10  12  332.08   26.95
  -2  10  13   94.57   12.94
  -2  10  14   41.62    9.22
  -2  10  15  185.77   16.18
  -2  10  15  216.10   19.09
  -2  10  16    7.83    3.35
  -2  11  -4   73.03   10.03
  -2  11  -4   73.14    8.98
  -2  11  -3  123.31   14.01
  -2  11  -3  135.04   13.24
  -2  11  -2   66.31   10.63
  -2  11  -2   73.21   10.23
  -2  11  -1  186.45   18.43
  -2  11  -1  247.86   19.88
  -2  11   0  138.49   15.46
  -2  11   0  158.11   16.24
  -2  11   1  114.80   14.35
  -2  11   2  288.17   23.43
  -2  11   3   72.74   11.44
  -2  11   4  228.62   20.91
  -2  11   5    4.59    2.37
  -2  11   6  193.25   19.22
  -2  11   7   14.51    4.99
  -2  11   8  228.01   20.52
  -2  11   9   10.39    3.79
  -2  11  10  241.76   20.19
  -2  11  11   38.09    7.34
  -2  11  12  153.91   15.77
  -2  11  12  156.51   14.58
  -2  11  13  123.84   12.71
  -2  12   2  104.78   10.05
  -2  12   3   28.12    5.25
  -2  12   4  132.58   11.87
  -2  12   5    4.40    1.83
  -2  12   6  235.32   16.42
  -2  12   7    0.98    1.68
  -1 -12  -1  169.73   14.64
  -1 -12   0   44.17    7.30
  -1 -12   1  141.90   13.18
  -1 -12   2   30.43    6.10
  -1 -12   3  173.05   13.73
  -1 -12   4   -2.08    1.71
  -1 -11  -3  148.29   16.81
  -1 -11  -2  202.76   19.94
  -1 -11  -1  189.35   19.63
  -1 -11   0  194.71   19.68
  -1 -11   1  210.71   20.64
  -1 -11   2  108.34   14.35
  -1 -11   3  242.69   21.63
  -1 -11   4   32.29    7.76
  -1 -11   5  421.93   27.44
  -1 -11   6    1.88    3.00
  -1 -11   7  337.74   21.46
  -1 -11   8   20.00    4.44
  -1 -10  -4  582.03   38.59
  -1 -10  -3  132.79   17.47
  -1 -10  -2  573.37   39.84
  -1 -10  -1  148.40   19.24
  -1 -10   0  163.14   20.41
  -1 -10   1  328.84   29.65
  -1 -10   2   70.74   13.53
  -1 -10   3  511.54   37.65
  -1 -10   4   53.29   11.52
  -1 -10   5  333.88   28.36
  -1 -10   6   54.56   10.61
  -1 -10   7  533.10   34.35
  -1 -10   8    6.92    3.48
  -1 -10   9  296.46   21.51
  -1 -10  10    4.86    3.17
  -1  -9  -3  104.91   16.76
  -1  -9  -2  753.66   48.37
  -1  -9  -1   46.41   11.62
  -1  -9   0  595.70   42.91
  -1  -9   1  383.71   33.59
  -1  -9   2  276.03   28.20
  -1  -9   3  492.45   38.85
  -1  -9   4  356.35   32.09
  -1  -9   5  678.27   45.66
  -1  -9   6  243.76   25.43
  -1  -9   7  743.46   46.64
  -1  -9   8    4.72    3.04
  -1  -9   9  507.56   34.33
  -1  -9  10    4.71    3.51
  -1  -9  11  249.79   19.84
  -1  -9  12    0.98    2.24
  -1  -8   1  197.55   23.23
  -1  -8   2 1083.39   61.60
  -1  -8   3  375.68   33.26
  -1  -8   4  468.45   37.58
  -1  -8   5  407.61   34.68
  -1  -8   6  182.73   22.57
  -1  -8   7  728.68   48.26
  -1  -8   8   19.35    8.08
  -1  -8   9  530.39   38.40
  -1  -8  10   23.34    7.31
  -1  -8  11  281.56   24.60
  -1  -8  12    7.40    4.44
  -1  -8  13  311.70   21.79
  -1  -7   3  269.75   26.99
  -1  -7   4  493.98   37.99
  -1  -7   5  804.23   50.57
  -1  -7   6  415.81   34.75
  -1  -7   7   99.23   16.44
  -1  -7   8   66.06   12.81
  -1  -7   8   53.40   11.80
  -1  -7   9  419.38   32.65
  -1  -7   9  446.84   35.99
  -1  -7  10   51.88   11.18
  -1  -7  10   55.54   12.05
  -1  -7  11  536.00   37.10
  -1  -7  11  551.91   38.76
  -1  -7  12   29.63    8.30
  -1  -7  12   32.89    8.86
  -1  -7  13  445.64   30.92
  -1  -7  13  452.56   30.83
  -1  -7  14   22.91    6.65
  -1  -7  14   19.75    5.41
  -1  -7  15  338.40   22.69
  -1  -7  16    5.25    2.02
  -1  -6   2 2269.98   88.58
  -1  -6   3  211.12   20.32
  -1  -6   4  213.43   21.54
  -1  -6   5  468.48   34.74
  -1  -6   5  471.92   37.61
  -1  -6   5  445.80   34.36
  -1  -6   6  893.23   52.76
  -1  -6   6  827.01   54.16
  -1  -6   6  847.91   50.90
  -1  -6   7  130.44   17.50
  -1  -6   7  131.49   19.34
  -1  -6   7  163.90   22.74
  -1  -6   7  126.12   17.47
  -1  -6   8  188.86   21.76
  -1  -6   8  174.37   23.46
  -1  -6   8  205.08   26.64
  -1  -6   8  199.96   23.05
  -1  -6   9   63.90   14.68
  -1  -6   9   54.88   11.46
  -1  -6   9   56.10   13.40
  -1  -6   9   51.56   11.76
  -1  -6  10    7.65    5.05
  -1  -6  10   11.39    6.82
  -1  -6  10    1.51    5.04
  -1  -6  11  440.56   35.18
  -1  -6  11  473.97   41.77
  -1  -6  12    0.98    2.70
  -1  -6  12    4.82    5.06
  -1  -6  13  519.36   36.97
  -1  -6  13  398.92   31.51
  -1  -6  14   36.25    8.76
  -1  -6  14   38.57    8.30
  -1  -6  15  761.16   43.52
  -1  -6  16   42.40    8.23
  -1  -6  17  404.42   25.14
  -1  -5   0  611.69   30.69
  -1  -5   1   45.65    7.67
  -1  -5   2  541.70   31.24
  -1  -5   3   27.05    6.13
  -1  -5   4 1653.64   71.98
  -1  -5   5  414.23   31.05
  -1  -5   6 1361.02   67.52
  -1  -5   7  249.29   25.96
  -1  -5   8  494.20   39.08
  -1  -5   8  421.26   37.72
  -1  -5   8  467.27   35.19
  -1  -5   9  944.27   59.42
  -1  -5   9  918.89   60.60
  -1  -5   9  936.17   54.58
  -1  -5  10  131.31   21.09
  -1  -5  10   94.28   15.98
  -1  -5  10   97.25   18.48
  -1  -5  10   97.73   15.83
  -1  -5  11  563.82   41.60
  -1  -5  11  637.78   48.31
  -1  -5  11  583.10   47.81
  -1  -5  12   16.36    6.94
  -1  -5  12   32.03   11.51
  -1  -5  12   17.62    6.66
  -1  -5  13  829.77   54.10
  -1  -5  13  954.77   63.04
  -1  -5  13  945.72   52.63
  -1  -5  14   -3.70    3.70
  -1  -5  14    2.53    5.58
  -1  -5  15  406.49   33.02
  -1  -5  15  407.11   36.40
  -1  -5  16    8.33    3.48
  -1  -5  17  656.94   38.99
  -1  -5  18    4.81    3.32
  -1  -5  19  289.13   19.05
  -1  -4  -1   57.24    6.63
  -1  -4   0 1055.46   42.53
  -1  -4   1   86.03    9.56
  -1  -4   2 2313.15   84.16
  -1  -4   3  167.13   15.72
  -1  -4   4 1224.41   55.55
  -1  -4   5  163.26   17.54
  -1  -4   6 1637.59   73.50
  -1  -4   7  135.29   18.17
  -1  -4   8 1355.92   69.93
  -1  -4   9  508.86   39.58
  -1  -4   9  477.92   39.45
  -1  -4  10  786.39   53.21
  -1  -4  10  790.03   54.61
  -1  -4  10  770.05   47.09
  -1  -4  11  996.92   62.88
  -1  -4  11 1009.14   64.85
  -1  -4  11 1007.65   56.09
  -1  -4  12  282.72   28.92
  -1  -4  12  253.15   31.21
  -1  -4  12  269.89   30.85
  -1  -4  13  617.84   45.69
  -1  -4  13  650.03   51.65
  -1  -4  14  307.32   30.64
  -1  -4  14  256.16   31.31
  -1  -4  15  555.00   41.35
  -1  -4  15  533.36   45.14
  -1  -4  16    5.38    7.85
  -1  -4  16   13.61    7.87
  -1  -4  17  534.70   37.49
  -1  -4  17  519.38   39.63
  -1  -4  18    9.15    5.50
  -1  -4  19  392.56   26.65
  -1  -4  19  384.98   22.39
  -1  -4  20   34.37    6.19
  -1  -3  -1  919.84   34.25
  -1  -3   0 1920.59   65.52
  -1  -3   1   35.14    5.44
  -1  -3   2  870.81   37.47
  -1  -3   3  236.37   17.15
  -1  -3   4 1780.77   69.48
  -1  -3   5   54.81    9.08
  -1  -3   6 1699.65   71.73
  -1  -3   7   74.87   11.89
  -1  -3   8 1138.57   58.90
  -1  -3   9  164.22   20.23
  -1  -3  10  827.38   52.36
  -1  -3  11  469.59   40.25
  -1  -3  11  459.40   35.86
  -1  -3  11  550.56   42.25
  -1  -3  12  316.96   33.80
  -1  -3  12  333.89   33.49
  -1  -3  13  816.15   58.44
  -1  -3  13  930.77   60.52
  -1  -3  14  203.77   25.29
  -1  -3  14  192.00   27.13
  -1  -3  15  286.96   29.90
  -1  -3  15  210.10   28.96
  -1  -3  16  119.50   20.49
  -1  -3  16  109.04   18.05
  -1  -3  17  602.55   41.97
  -1  -3  17  450.33   39.76
  -1  -3  18   -0.22    4.14
  -1  -3  18    6.45    4.03
  -1  -3  19  207.39   20.33
  -1  -3  19  186.30   19.28
  -1  -3  20   19.87    5.75
  -1  -3  21  267.98   17.81
  -1  -2  -2 4114.15  121.50
  -1  -2  -1 1386.94   44.94
  -1  -2   0  643.15   24.30
  -1  -2   1  168.60   10.29
  -1  -2   2 4750.26  147.45
  -1  -2   3  272.18   16.32
  -1  -2   4 1640.68   60.93
  -1  -2   5   13.03    3.84
  -1  -2   6  433.48   26.60
  -1  -2   7   14.09    4.30
  -1  -2   8 2117.45   85.75
  -1  -2   9   19.34    6.36
  -1  -2  10 1081.28   58.13
  -1  -2  11  580.06   41.56
  -1  -2  12  654.18   46.92
  -1  -2  12  606.86   41.65
  -1  -2  12  659.94   46.48
  -1  -2  13  380.52   36.76
  -1  -2  13  407.21   34.23
  -1  -2  13  430.95   38.02
  -1  -2  14  390.22   37.69
  -1  -2  14  407.01   35.39
  -1  -2  14  418.95   38.53
  -1  -2  15  292.65   30.61
  -1  -2  15  282.34   32.46
  -1  -2  15  267.22   28.63
  -1  -2  16   60.28   14.35
  -1  -2  16   59.87   13.87
  -1  -2  17  373.44   33.73
  -1  -2  17  298.57   32.79
  -1  -2  18  142.75   19.20
  -1  -2  18   97.66   17.35
  -1  -2  19  102.49   15.33
  -1  -2  19  117.81   17.33
  -1  -2  20    0.25    2.97
  -1  -2  21  264.59   19.71
  -1  -2  21  261.35   19.11
  -1  -1  -9 1467.21   49.96
  -1  -1  -8   20.05    3.23
  -1  -1  -1 2908.24   86.11
  -1  -1   0 1518.53   47.63
  -1  -1   1  143.32    8.08
  -1  -1   2  765.16   28.73
  -1  -1   5   45.65    6.43
  -1  -1   6  282.78   18.75
  -1  -1   7  141.62   13.55
  -1  -1   8 2682.52   98.32
  -1  -1   9   10.74    5.05
  -1  -1  10 3119.37  117.75
  -1  -1  11  376.80   30.36
  -1  -1  12  761.05   47.91
  -1  -1  13  281.28   29.56
  -1  -1  13  295.36   27.18
  -1  -1  13  334.96   31.33
  -1  -1  14  357.93   34.45
  -1  -1  14  329.64   30.60
  -1  -1  14  380.96   35.05
  -1  -1  15  211.02   25.80
  -1  -1  15  177.28   24.76
  -1  -1  15  175.73   22.14
  -1  -1  15  171.64   23.80
  -1  -1  16  186.75   24.31
  -1  -1  16  192.41   25.76
  -1  -1  16  175.53   22.77
  -1  -1  17  431.38   36.74
  -1  -1  17  305.79   33.54
  -1  -1  17  375.17   34.12
  -1  -1  18   84.98   17.15
  -1  -1  18  102.23   17.30
  -1  -1  18   96.63   16.24
  -1  -1  19  151.73   19.20
  -1  -1  19  126.71   19.11
  -1  -1  20    2.07    2.84
  -1  -1  21  389.09   25.98
  -1  -1  22    8.25    3.75
  -1   0  -8   67.49    6.14
  -1   0  -7  831.24   31.13
  -1   0  -6   49.83    4.91
  -1   0  -5 1723.56   56.24
  -1   0  -4 1459.62   47.92
  -1   0  -3 2518.59   78.02
  -1   0  -2 2524.42   77.63
  -1   0  -1 2058.27   63.62
  -1   0   0  522.77   18.60
  -1   0   1 3541.64  105.70
  -1   0   2 5335.29  157.08
  -1   0   3 1833.94   59.11
  -1   0   3 2002.90   58.49
  -1   0   4   87.49    4.41
  -1   0   4   83.02    7.39
  -1   0   5   71.13    7.51
  -1   0   6 1969.46   69.59
  -1   0   7  134.03   12.16
  -1   0   8 2869.39  100.72
  -1   0   9   14.72    4.59
  -1   0  10 2593.62   97.97
  -1   0  11  739.89   42.11
  -1   0  12 1278.21   63.07
  -1   0  13   48.76   10.15
  -1   0  13   69.50   13.53
  -1   0  13   60.44   11.73
  -1   0  14  856.24   54.44
  -1   0  14  741.27   46.88
  -1   0  14  803.03   51.43
  -1   0  15  174.68   23.50
  -1   0  15  184.04   23.99
  -1   0  15  182.48   22.07
  -1   0  15  224.28   26.23
  -1   0  16  309.61   31.03
  -1   0  16  244.11   28.61
  -1   0  16  278.30   27.99
  -1   0  17  408.91   36.36
  -1   0  17  446.38   39.85
  -1   0  17  513.28   39.43
  -1   0  18  169.32   21.77
  -1   0  18  167.45   23.59
  -1   0  18  198.49   23.78
  -1   0  19  238.56   25.04
  -1   0  19  326.32   31.24
  -1   0  19  311.22   29.32
  -1   0  20   11.47    3.31
  -1   0  20   15.25    6.41
  -1   0  22   29.76    6.61
  -1   1  -8   13.74    3.27
  -1   1  -7 3659.80  116.56
  -1   1  -6  117.68    9.21
  -1   1  -5 2347.76   77.03
  -1   1  -4  429.64   19.50
  -1   1  -3 6813.57  204.84
  -1   1  -2    4.02    1.83
  -1   1  -1 7139.62  213.14
  -1   1   0  648.48   24.78
  -1   1   1 1104.89   38.20
  -1   1   2  831.07   30.27
  -1   1   3 9999.00  296.37
  -1   1   4  868.53   32.18
  -1   1   5  327.02   14.53
  -1   1   5  299.86   16.47
  -1   1   5  301.30   14.98
  -1   1   6  314.77   17.88
  -1   1   6  306.14   15.91
  -1   1   7   35.79    4.35
  -1   1   7   42.80    6.42
  -1   1   8 2049.25   74.87
  -1   1   9   20.35    4.99
  -1   1  10  631.37   34.50
  -1   1  11    2.56    2.52
  -1   1  12  870.56   46.79
  -1   1  13  118.18   17.41
  -1   1  13  115.63   15.40
  -1   1  13  121.75   16.17
  -1   1  14  759.97   49.23
  -1   1  14  667.57   43.28
  -1   1  14  752.49   46.93
  -1   1  15  103.14   15.70
  -1   1  15  119.51   18.83
  -1   1  15   99.00   16.60
  -1   1  16  596.24   44.75
  -1   1  16  563.52   40.07
  -1   1  17  259.91   26.58
  -1   1  17  199.58   25.77
  -1   1  17  253.48   26.39
  -1   1  18  261.36   29.79
  -1   1  18  377.92   32.64
  -1   1  19  262.26   28.22
  -1   1  19  231.84   25.33
  -1   1  20   66.97   13.41
  -1   1  20   62.86   12.83
  -1   1  21  340.80   27.62
  -1   1  22   54.39    9.34
  -1   1  23  154.18   13.34
  -1   2  -8  139.79   12.37
  -1   2  -7 1027.45   43.08
  -1   2  -6 1196.45   47.90
  -1   2  -5 5289.83  167.23
  -1   2  -4  895.71   37.61
  -1   2  -3 6629.75  204.49
  -1   2  -2 8869.47  268.68
  -1   2  -1 2014.80   69.65
  -1   2   0  532.05   24.97
  -1   2   1  110.57    9.52
  -1   2   2  200.52   13.58
  -1   2   3  815.08   34.56
  -1   2   4  361.98   20.06
  -1   2   5  314.07   17.98
  -1   2   6 1613.68   57.22
  -1   2   6 1520.84   56.07
  -1   2   6 1609.81   56.38
  -1   2   7  253.40   16.48
  -1   2   7  247.90   15.85
  -1   2   7  280.23   19.18
  -1   2   8  738.54   34.04
  -1   2   8  672.39   32.10
  -1   2   8  752.66   34.39
  -1   2   9  649.16   32.36
  -1   2   9  581.92   29.80
  -1   2  10 1526.17   62.23
  -1   2  11    9.43    4.00
  -1   2  12  521.51   33.19
  -1   2  13    1.34    2.35
  -1   2  13    0.94    2.94
  -1   2  13    5.53    2.46
  -1   2  14  962.97   56.20
  -1   2  14  883.53   50.80
  -1   2  15   68.70   13.54
  -1   2  15   75.62   13.72
  -1   2  15   69.86   14.14
  -1   2  16  436.26   36.27
  -1   2  16  512.02   40.34
  -1   2  16  422.11   34.47
  -1   2  17  152.51   22.38
  -1   2  17  193.04   22.83
  -1   2  18  679.42   49.76
  -1   2  18  815.70   50.36
  -1   2  19  163.79   22.40
  -1   2  19  204.24   23.06
  -1   2  20  157.82   20.54
  -1   2  20  154.06   19.48
  -1   2  21  238.81   22.99
  -1   2  22   89.04   12.39
  -1   2  22   86.84   11.52
  -1   2  23  232.37   16.81
  -1   3  -7  268.16   20.00
  -1   3  -6  616.25   33.04
  -1   3  -5 2577.25   93.19
  -1   3  -4  285.14   20.32
  -1   3  -3 3169.28  109.67
  -1   3  -2 1268.95   52.59
  -1   3  -1  265.12   18.69
  -1   3   0   -2.45    2.40
  -1   3   1  457.68   25.85
  -1   3   2  215.20   16.53
  -1   3   3 1264.59   52.41
  -1   3   3 1278.94   39.59
  -1   3   4 1431.20   57.53
  -1   3   5 1141.19   48.57
  -1   3   6  464.95   26.07
  -1   3   7 1171.02   47.76
  -1   3   7 1189.40   56.95
  -1   3   8 1517.06   56.42
  -1   3   8 1468.65   56.40
  -1   3   9  526.07   31.32
  -1   3   9  473.01   26.79
  -1   3  10  832.70   42.48
  -1   3  10 1070.22   45.90
  -1   3  11  577.45   33.33
  -1   3  12 1195.00   55.66
  -1   3  13  117.06   14.87
  -1   3  13  119.12   17.56
  -1   3  13  107.99   15.44
  -1   3  14  548.17   36.99
  -1   3  14  632.59   41.00
  -1   3  14  650.97   44.78
  -1   3  15   14.96    5.85
  -1   3  15    8.73    7.75
  -1   3  15   13.21    5.10
  -1   3  16  310.46   28.82
  -1   3  16  344.38   33.11
  -1   3  17  182.91   21.74
  -1   3  17  100.65   17.46
  -1   3  18  457.38   39.26
  -1   3  18  570.68   40.46
  -1   3  19  226.92   25.68
  -1   3  19  257.10   26.02
  -1   3  20  545.48   39.41
  -1   3  20  556.21   38.47
  -1   3  21   84.67   13.31
  -1   3  21   69.78   10.96
  -1   3  22  156.11   15.11
  -1   3  22  191.12   18.26
  -1   4  -7  185.29   17.95
  -1   4  -6  753.00   40.79
  -1   4  -5 2116.03   84.03
  -1   4  -4 1297.81   58.49
  -1   4  -3  767.15   40.84
  -1   4  -2   32.46    7.25
  -1   4  -1 1208.88   54.61
  -1   4   0  115.40   13.56
  -1   4   1  803.58   41.12
  -1   4   2   11.09    4.32
  -1   4   3 1087.82   50.48
  -1   4   4  410.89   27.23
  -1   4   5 1530.47   64.93
  -1   4   6  248.44   20.40
  -1   4   7  675.18   44.26
  -1   4   7  672.86   28.40
  -1   4   8  605.99   33.22
  -1   4   8  610.17   41.70
  -1   4   8  624.61   28.39
  -1   4   9  409.11   26.44
  -1   4   9  414.87   33.62
  -1   4   9  550.68   26.65
  -1   4   9  539.96   30.74
  -1   4  10 2548.41   91.43
  -1   4  10 2414.58   92.32
  -1   4  10 2354.76   86.44
  -1   4  11  529.80   33.24
  -1   4  11  534.96   30.02
  -1   4  12  575.78   33.31
  -1   4  12  639.41   40.25
  -1   4  13   33.53    7.17
  -1   4  13   51.74   12.30
  -1   4  14  622.86   42.26
  -1   4  14  666.22   46.27
  -1   4  15    0.12    2.93
  -1   4  15    3.22    4.91
  -1   4  16  471.18   36.56
  -1   4  16  410.67   36.62
  -1   4  17   20.03    7.31
  -1   4  17   18.13    7.59
  -1   4  18  584.04   44.38
  -1   4  18  736.15   46.65
  -1   4  19  120.69   17.36
  -1   4  19   99.94   16.25
  -1   4  20  449.31   33.52
  -1   4  20  436.05   32.06
  -1   4  21   56.65   10.56
  -1   4  21   59.34    9.14
  -1   4  22  343.70   25.04
  -1   5  -6  572.76   37.48
  -1   5  -5 1286.69   62.30
  -1   5  -4  862.21   47.74
  -1   5  -3  811.67   45.71
  -1   5  -2  382.10   29.01
  -1   5  -1 1784.45   77.21
  -1   5   0  580.02   36.49
  -1   5   1  616.40   37.79
  -1   5   2   18.93    6.38
  -1   5   3  723.72   41.78
  -1   5   4   30.42    7.81
  -1   5   5 1526.71   69.11
  -1   5   6  167.22   22.66
  -1   5   6  139.49   16.72
  -1   5   7 1000.61   61.96
  -1   5   8  372.84   35.48
  -1   5   9 1278.26   53.89
  -1   5   9 1249.09   57.00
  -1   5  10  594.67   46.49
  -1   5  10  761.24   41.97
  -1   5  11 1313.40   63.13
  -1   5  11 1344.04   65.82
  -1   5  12 1433.23   67.60
  -1   5  12 1438.43   70.72
  -1   5  13   26.89    8.41
  -1   5  14  562.08   43.08
  -1   5  15   29.51    9.64
  -1   5  15   11.43    5.73
  -1   5  16  393.50   33.43
  -1   5  16  324.93   32.43
  -1   5  17   16.65    7.83
  -1   5  17   11.37    5.60
  -1   5  18  439.47   37.08
  -1   5  18  505.64   37.58
  -1   5  19    6.84    5.73
  -1   5  19    8.55    5.00
  -1   5  20  320.25   27.50
  -1   5  20  322.96   27.15
  -1   5  21   39.01    8.47
  -1   5  22  208.83   18.03
  -1   6  -5  471.52   36.49
  -1   6  -5  566.68   44.49
  -1   6  -4 1193.87   63.96
  -1   6  -4 1295.86   73.10
  -1   6  -3  367.05   31.23
  -1   6  -3  406.29   37.94
  -1   6  -2   25.44    7.76
  -1   6  -1 1052.86   57.62
  -1   6   0  235.73   24.12
  -1   6   1  315.71   28.10
  -1   6   2  109.65   15.97
  -1   6   3  504.58   36.49
  -1   6   3  528.80   44.20
  -1   6   4   24.16    7.49
  -1   6   4   26.65    8.98
  -1   6   5 1216.75   72.93
  -1   6   6  112.31   20.41
  -1   6   7  589.79   48.94
  -1   6   8    3.63    6.75
  -1   6   8   -2.30    3.52
  -1   6   9 1028.87   70.02
  -1   6   9 1178.38   59.50
  -1   6   9 1182.66   60.98
  -1   6  10  537.11   36.93
  -1   6  10  578.25   39.47
  -1   6  11  788.40   47.08
  -1   6  11  723.80   47.36
  -1   6  12  724.42   45.93
  -1   6  12  715.25   47.04
  -1   6  13   31.19    8.85
  -1   6  13   17.55    5.62
  -1   6  14  471.94   38.03
  -1   6  15   22.54    8.25
  -1   6  16  456.45   36.95
  -1   6  16  424.61   37.41
  -1   6  17   19.59    8.68
  -1   6  17   16.46    7.78
  -1   6  18  416.01   35.08
  -1   6  18  530.61   37.82
  -1   6  19   14.00    6.33
  -1   6  19   14.60    6.12
  -1   6  20  195.15   19.96
  -1   6  20  198.90   20.06
  -1   6  21   23.57    6.34
  -1   6  22  253.44   18.65
  -1   7  -4  279.20   33.38
  -1   7  -3  294.79   34.89
  -1   7  -2  602.36   50.91
  -1   7  -1  751.49   50.47
  -1   7  -1  825.15   61.05
  -1   7   0  212.80   25.01
  -1   7   0  197.49   28.77
  -1   7   1  832.86   61.76
  -1   7   2   89.70   19.65
  -1   7   3 1647.57   94.84
  -1   7   3 1813.52   82.96
  -1   7   4   37.69   12.02
  -1   7   4   37.31    9.75
  -1   7   5  627.94   53.83
  -1   7   5  738.36   46.76
  -1   7   6   66.09   16.47
  -1   7   6   53.82   11.57
  -1   7   7  994.72   70.74
  -1   7   7 1016.26   58.26
  -1   7   8   38.60   10.93
  -1   7   8   45.25   11.20
  -1   7   9  499.88   49.01
  -1   7   9  561.18   39.94
  -1   7   9  501.72   38.86
  -1   7  10  290.36   36.54
  -1   7  10  256.16   26.60
  -1   7  10  261.95   27.34
  -1   7  11  255.57   26.46
  -1   7  11  217.53   25.10
  -1   7  12  416.97   35.74
  -1   7  13   11.05    6.02
  -1   7  14  121.88   18.90
  -1   7  15  191.13   24.61
  -1   7  16  370.80   32.76
  -1   7  16  345.75   32.73
  -1   7  17   83.98   15.56
  -1   7  17   88.78   14.70
  -1   7  18  453.88   34.94
  -1   7  18  475.04   34.68
  -1   7  19    4.16    3.94
  -1   7  19    4.51    3.28
  -1   7  20  368.86   26.44
  -1   7  21    3.10    2.37
  -1   8  -2  298.20   37.02
  -1   8  -1  490.49   48.79
  -1   8   0  333.10   39.69
  -1   8   1  584.76   53.66
  -1   8   2   91.16   20.85
  -1   8   2  104.14   17.18
  -1   8   3  981.51   72.15
  -1   8   3  956.93   57.87
  -1   8   4  115.85   23.09
  -1   8   4  144.66   20.27
  -1   8   5  981.55   72.10
  -1   8   5  970.46   58.78
  -1   8   6    2.16    5.58
  -1   8   6    1.97    5.48
  -1   8   7  618.27   56.64
  -1   8   7  688.05   47.68
  -1   8   8    4.74    4.78
  -1   8   8   17.50    7.04
  -1   8   9  401.45   45.06
  -1   8   9  412.77   36.28
  -1   8  10  257.85   28.20
  -1   8  11  186.50   23.92
  -1   8  12   44.67   11.38
  -1   8  13  256.10   27.50
  -1   8  14   44.02   10.38
  -1   8  15  302.22   30.47
  -1   8  16  289.17   27.72
  -1   8  16  303.06   29.08
  -1   8  17  148.59   18.46
  -1   8  17  143.47   18.52
  -1   8  18  257.19   23.44
  -1   8  18  272.22   23.82
  -1   8  19   44.38    8.74
  -1   8  19   48.76    9.33
  -1   8  20  201.79   16.91
  -1   9   0   55.98   12.24
  -1   9   1  232.96   26.29
  -1   9   2  135.63   19.82
  -1   9   3  386.17   34.41
  -1   9   4  274.10   29.06
  -1   9   5  384.20   34.79
  -1   9   6   10.72    5.78
  -1   9   7 1284.51   71.66
  -1   9   8    4.59    3.86
  -1   9   9  601.83   45.15
  -1   9  10    6.82    4.20
  -1   9  11  324.19   31.35
  -1   9  12   97.14   16.54
  -1   9  13  345.42   31.31
  -1   9  14  155.69   19.85
  -1   9  15  411.99   34.01
  -1   9  16  142.89   17.53
  -1   9  16  154.06   18.77
  -1   9  17  163.05   17.63
  -1   9  17  192.17   19.27
  -1   9  18  136.66   14.19
  -1   9  18  137.25   14.57
  -1   9  19  132.80   12.83
  -1  10  -9   83.93   10.04
  -1  10  -8  333.39   23.42
  -1  10  -7   30.61    7.15
  -1  10  -6  334.77   25.99
  -1  10  -5    7.16    5.16
  -1  10  -4  564.52   37.64
  -1  10  -3   80.73   13.63
  -1  10  -2  467.83   35.54
  -1  10  -1  202.72   22.78
  -1  10   0  341.90   30.59
  -1  10   1   24.84    9.24
  -1  10   2  201.85   23.24
  -1  10   3  112.64   17.18
  -1  10   4  167.00   21.59
  -1  10   5  422.24   35.74
  -1  10   6  128.62   19.06
  -1  10   7  301.83   29.37
  -1  10   8  172.74   21.37
  -1  10   9  370.37   32.57
  -1  10  10   10.25    7.07
  -1  10  11  323.53   29.08
  -1  10  12   10.76    4.42
  -1  10  13  246.77   23.76
  -1  10  14  246.65   22.77
  -1  10  15  253.51   22.60
  -1  10  16   58.49    9.61
  -1  10  16   65.52   10.24
  -1  10  17  197.54   16.36
  -1  11  -6  298.92   19.62
  -1  11  -5    5.59    2.98
  -1  11  -4  374.46   25.11
  -1  11  -3   -1.73    1.99
  -1  11  -2  349.16   25.93
  -1  11  -1   17.07    5.27
  -1  11   0  336.76   26.69
  -1  11   1   10.64    5.60
  -1  11   2  352.18   28.28
  -1  11   3   83.05   13.16
  -1  11   4  183.22   20.11
  -1  11   5  153.07   18.32
  -1  11   6   62.60   11.26
  -1  11   7  268.37   24.38
  -1  11   8   26.95    7.54
  -1  11   9  137.98   16.55
  -1  11  10   11.77    4.70
  -1  11  11  238.37   21.40
  -1  11  12   12.60    4.80
  -1  11  13  229.56   19.22
  -1  11  14   22.39    5.44
  -1  11  15  179.81   14.57
  -1  12  -2  199.76   14.44
  -1  12  -1    5.67    2.97
  -1  12   0  253.52   18.11
  -1  12   1   21.37    5.13
  -1  12   2  178.65   15.74
  -1  12   3   63.69    9.06
  -1  12   4  158.96   15.10
  -1  12   5   84.92   10.71
  -1  12   6  101.00   11.85
  -1  12   7  129.82   13.50
  -1  12   8   65.49    9.30
  -1  12   9  267.99   19.23
  -1  12  10   21.43    5.05
  -1  12  11  308.73   19.25
   0 -11  -1  309.51   23.57
   0 -11   0    4.94    4.61
   0 -11   1  277.06   22.41
   0 -11   2   21.45    5.28
   0 -11   3  286.39   22.56
   0 -11   4  102.05   12.48
   0 -11   5  114.39   12.65
   0 -11   6  133.43   12.81
   0 -11   7  176.79   13.97
   0 -10  -2   21.20    7.29
   0 -10  -1  404.70   31.33
   0 -10   0   71.79   12.98
   0 -10   1  563.86   39.01
   0 -10   2   71.81   13.37
   0 -10   3  414.39   32.32
   0 -10   4   99.69   14.64
   0 -10   5  308.77   26.29
   0 -10   6  298.17   24.96
   0 -10   7  236.51   20.93
   0 -10   8  266.53   21.11
   0 -10   9   94.57   11.20
   0 -10  10  313.77   19.69
   0  -9  -2   47.53   10.55
   0  -9  -1  880.24   51.76
   0  -9   0   17.23    5.63
   0  -9   1  579.50   41.23
   0  -9   2   30.83    9.51
   0  -9   3  680.33   45.69
   0  -9   4  114.97   17.85
   0  -9   5  475.85   37.03
   0  -9   6  242.75   24.93
   0  -9   7  384.03   31.47
   0  -9   8  401.83   31.48
   0  -9   9   96.62   13.87
   0  -9  10  305.69   24.00
   0  -9  11   85.26   10.86
   0  -9  12  209.18   15.93
   0  -8  -2  192.83   21.06
   0  -8  -1  721.29   45.23
   0  -8   0   40.35    9.33
   0  -8   1 1025.65   57.97
   0  -8   2    5.75    5.87
   0  -8   3  529.52   39.91
   0  -8   4   -1.54    3.29
   0  -8   5  421.97   35.31
   0  -8   6  335.85   31.16
   0  -8   7  534.03   40.08
   0  -8   8  235.79   25.38
   0  -8   9  403.50   32.92
   0  -8  10  244.96   24.16
   0  -8  11   84.95   12.96
   0  -8  12  331.78   25.10
   0  -8  13  113.53   12.53
   0  -8  14  183.40   14.16
   0  -7   1  602.27   39.93
   0  -7   2    2.54    3.54
   0  -7   3 1570.21   75.74
   0  -7   4    5.12    3.47
   0  -7   5  582.87   41.55
   0  -7   6   20.34    7.76
   0  -7   7  350.47   31.91
   0  -7   8  100.90   16.32
   0  -7   9  438.69   32.91
   0  -7   9  473.05   37.51
   0  -7  10   93.00   14.28
   0  -7  10  109.40   16.85
   0  -7  11  536.69   36.35
   0  -7  11  513.19   37.99
   0  -7  12  317.70   26.26
   0  -7  12  347.87   28.64
   0  -7  13  115.27   14.66
   0  -7  13  146.05   16.74
   0  -7  14  316.64   23.35
   0  -7  14  305.66   23.09
   0  -7  15   91.28   10.88
   0  -7  15   78.28    9.66
   0  -6   5 1434.36   70.15
   0  -6   6   39.67    9.37
   0  -6   7  564.60   37.72
   0  -6   7  576.84   41.08
   0  -6   8   18.09    7.55
   0  -6   8    1.19    4.21
   0  -6   9  182.66   21.25
   0  -6   9  206.20   24.21
   0  -6  10  401.22   33.45
   0  -6  10  424.84   35.31
   0  -6  11  316.33   29.27
   0  -6  11  338.98   31.04
   0  -6  12  156.74   20.09
   0  -6  12  155.62   19.99
   0  -6  13  570.29   39.40
   0  -6  13  553.24   38.29
   0  -6  14  323.78   27.43
   0  -6  14  295.65   25.30
   0  -6  15   63.42   10.91
   0  -6  15   42.72    7.75
   0  -6  16  309.20   23.41
   0  -6  17   34.36    6.58
   0  -5   3 2232.79   87.33
   0  -5   4  202.00   19.65
   0  -5   5  547.93   36.10
   0  -5   6    9.68    5.29
   0  -5   7 1582.77   76.14
   0  -5   8   15.50    6.81
   0  -5   8    7.10    3.81
   0  -5   8    9.54    6.02
   0  -5   8   12.31    6.01
   0  -5   9  662.00   43.63
   0  -5   9  676.69   47.62
   0  -5   9  695.08   50.42
   0  -5   9  711.71   46.08
   0  -5  10   72.69   14.78
   0  -5  10   92.38   15.52
   0  -5  10   79.52   16.70
   0  -5  10   74.44   13.72
   0  -5  11  878.62   54.02
   0  -5  11  903.77   59.08
   0  -5  11  925.61   60.84
   0  -5  11  884.09   54.16
   0  -5  12  191.36   23.05
   0  -5  12  196.28   26.11
   0  -5  12  174.86   21.58
   0  -5  13  348.10   31.53
   0  -5  13  281.07   27.44
   0  -5  14  204.97   23.33
   0  -5  14  144.67   18.69
   0  -5  15  335.61   29.65
   0  -5  15  349.41   27.25
   0  -5  16  513.59   35.75
   0  -5  17   42.10    8.77
   0  -5  18  213.71   18.28
   0  -5  19   61.37    8.18
   0  -4   1 1067.20   45.33
   0  -4   2  393.76   24.37
   0  -4   3 2046.61   78.51
   0  -4   4  529.86   31.85
   0  -4   5  979.40   49.06
   0  -4   6   50.53   10.02
   0  -4   7 1778.65   79.77
   0  -4   8    0.03    3.68
   0  -4   9  365.58   32.26
   0  -4  10   20.14    8.65
   0  -4  10   21.78    6.58
   0  -4  10   27.30    9.94
   0  -4  10    9.08    5.37
   0  -4  11  477.61   37.89
   0  -4  11  544.09   34.83
   0  -4  11  511.53   41.43
   0  -4  11  479.17   42.03
   0  -4  11  528.35   38.60
   0  -4  12   12.67    6.63
   0  -4  12    3.68    6.91
   0  -4  12    8.76    4.41
   0  -4  13  656.73   51.63
   0  -4  13  696.56   45.99
   0  -4  14  271.99   28.32
   0  -4  14  223.07   27.28
   0  -4  14  246.11   24.66
   0  -4  15  128.05   19.27
   0  -4  15  160.15   22.68
   0  -4  16  308.09   29.00
   0  -4  17  264.01   25.41
   0  -4  18  427.19   30.76
   0  -4  19   41.18    8.04
   0  -4  20  126.45   12.28
   0  -3   0  592.29   26.65
   0  -3   1  695.71   31.23
   0  -3   2  619.82   30.07
   0  -3   3 1753.41   66.64
   0  -3   4 1207.21   51.88
   0  -3   5 1177.71   53.06
   0  -3   6  252.72   21.31
   0  -3   7 1893.50   79.95
   0  -3   8  173.71   19.34
   0  -3   9 1263.62   64.61
   0  -3  10   -1.52    4.07
   0  -3  11  855.04   50.99
   0  -3  11  832.83   52.91
   0  -3  11  885.28   56.50
   0  -3  11  682.80   46.85
   0  -3  11  896.34   49.33
   0  -3  12    3.15    4.77
   0  -3  12    6.60    5.55
   0  -3  12    6.33    8.58
   0  -3  12    7.43    5.04
   0  -3  13  826.30   52.07
   0  -3  13  823.43   48.14
   0  -3  13  824.90   54.79
   0  -3  14  156.51   21.53
   0  -3  14  124.28   21.17
   0  -3  14  171.27   20.57
   0  -3  15  693.05   47.57
   0  -3  15  579.49   46.95
   0  -3  16  162.24   21.66
   0  -3  16  134.02   20.75
   0  -3  17   50.30   11.15
   0  -3  18  202.75   22.25
   0  -3  19  293.38   24.95
   0  -3  20  274.59   21.48
   0  -3  20  243.20   17.74
   0  -3  21   22.54    4.81
   0  -2   0 3454.37  107.74
   0  -2   1  154.89   10.69
   0  -2   4  589.03   29.19
   0  -2   5  837.73   39.09
   0  -2   6 1369.90   57.75
   0  -2   7 2387.57   91.11
   0  -2   8  127.07   15.23
   0  -2   9  974.29   51.66
   0  -2  10  300.16   26.87
   0  -2  11 1773.85   82.82
   0  -2  12    8.31    7.67
   0  -2  12   -5.46    4.26
   0  -2  12    5.19    3.90
   0  -2  12    5.04    4.37
   0  -2  13 1477.38   75.62
   0  -2  13 1536.08   80.75
   0  -2  13 1370.12   72.52
   0  -2  13 1486.12   77.23
   0  -2  14  217.69   25.48
   0  -2  14  175.02   24.51
   0  -2  14  200.66   24.55
   0  -2  14  207.20   23.52
   0  -2  14  209.89   25.90
   0  -2  15  488.71   39.72
   0  -2  15  414.28   39.09
   0  -2  15  443.35   38.25
   0  -2  16   20.59    8.19
   0  -2  16   22.55    8.58
   0  -2  17  320.22   30.90
   0  -2  18  204.93   23.46
   0  -2  19  221.76   23.13
   0  -2  20  162.47   17.70
   0  -2  20  155.15   16.24
   0  -2  21  164.81   15.69
   0  -2  21  172.93   15.07
   0  -1   0 5212.86  154.87
   0  -1   3 2882.09   92.21
   0  -1   4  881.11   35.35
   0  -1   5   43.18    6.42
   0  -1   6  636.68   31.02
   0  -1   7 1349.15   55.58
   0  -1   8  569.75   32.51
   0  -1   9 3468.38  124.76
   0  -1  10  603.06   37.52
   0  -1  11  911.95   50.82
   0  -1  12    3.22    2.86
   0  -1  13 1044.99   59.90
   0  -1  13 1099.20   62.50
   0  -1  13 1012.56   56.67
   0  -1  13 1078.63   60.42
   0  -1  14   61.04   13.72
   0  -1  14   66.41   13.12
   0  -1  14   56.14   12.90
   0  -1  14   44.82   10.65
   0  -1  14   68.54   13.38
   0  -1  15  941.91   58.21
   0  -1  15  894.16   59.26
   0  -1  15  857.82   55.89
   0  -1  15 1032.45   58.68
   0  -1  16   48.38   12.11
   0  -1  16   48.62   11.71
   0  -1  17  285.01   29.66
   0  -1  17  291.58   30.75
   0  -1  18  182.14   22.37
   0  -1  18  145.67   21.49
   0  -1  19  440.86   34.76
   0  -1  20  128.92   16.73
   0  -1  21  147.61   15.68
   0  -1  21  163.49   16.64
   0  -1  22  141.24   12.86
   0  -1  22  194.08   15.62
   0   0  -5  339.07   11.47
   0   0  -4 1916.23   56.97
   0   0  -3  732.94   22.48
   0   0   2 2588.36   78.28
   0   0   3  634.12   23.28
   0   0   4 1680.36   55.69
   0   0   5  294.62   15.66
   0   0   6 1092.20   42.26
   0   0   7  432.85   23.24
   0   0   8  236.31   17.27
   0   0   9  528.68   30.12
   0   0  10  425.98   28.04
   0   0  11  352.26   26.81
   0   0  12  262.54   24.12
   0   0  13  779.07   45.88
   0   0  13  823.22   48.82
   0   0  14    6.99    4.40
   0   0  14    4.88    5.06
   0   0  14   -1.44    4.84
   0   0  14   -2.70    4.69
   0   0  14   10.98    5.53
   0   0  15  923.31   56.93
   0   0  15  955.38   58.81
   0   0  15  875.92   53.99
   0   0  15 1014.10   58.39
   0   0  16   -0.50    4.64
   0   0  16   11.38    6.46
   0   0  17  346.84   32.76
   0   0  17  435.14   36.99
   0   0  18   92.82   16.89
   0   0  18   84.97   15.31
   0   0  19  293.22   28.11
   0   0  19  373.18   33.97
   0   0  20   35.11    9.18
   0   0  20   18.50    7.54
   0   0  21  224.76   19.98
   0   0  22  203.55   18.28
   0   0  23  116.42   11.20
   0   1  -6  628.59   23.07
   0   1  -5   49.72    4.52
   0   1  -4  940.27   32.61
   0   1  -3 3270.50   99.99
   0   1  -2 4282.31  129.04
   0   1  -1    3.20    1.07
   0   1   0 5889.05  175.24
   0   1   1  193.71    9.23
   0   1   1  181.11    6.59
   0   1   2 2369.02   73.01
   0   1   3  223.69    9.73
   0   1   3  217.68   10.51
   0   1   3  242.87   12.21
   0   1   4 1299.01   43.50
   0   1   4 1285.36   41.73
   0   1   4 1187.52   42.18
   0   1   5   92.15    7.03
   0   1   5   92.64    7.01
   0   1   5   82.60    6.84
   0   1   6 2234.74   73.62
   0   1   7  655.89   28.15
   0   1   7  615.99   23.30
   0   1   8  229.90   15.50
   0   1   9  160.55   13.67
   0   1  10  337.49   22.49
   0   1  11  632.99   35.39
   0   1  12   66.93   10.98
   0   1  13  909.73   49.79
   0   1  14  156.59   19.84
   0   1  14  186.99   20.88
   0   1  14  158.82   20.07
   0   1  15 1494.69   74.32
   0   1  15 1475.26   72.78
   0   1  15 1487.15   75.14
   0   1  16    2.34    5.44
   0   1  16    5.59    4.73
   0   1  16    3.90    4.87
   0   1  17  284.38   28.26
   0   1  17  362.96   32.64
   0   1  18   32.07   10.13
   0   1  18   44.68   10.48
   0   1  19  308.27   27.17
   0   1  19  305.48   29.96
   0   1  20   35.52   10.33
   0   1  21  280.99   26.42
   0   1  22   76.66   11.69
   0   1  23  119.87   12.39
   0   2  -7 2251.09   74.36
   0   2  -6 1340.31   48.54
   0   2  -6 1342.12   48.65
   0   2  -5  882.46   34.98
   0   2  -4  588.91   25.88
   0   2  -3 1571.81   55.32
   0   2  -2  118.15    9.36
   0   2  -1  201.76   12.70
   0   2   0 3837.81  120.97
   0   2   1   39.05    5.12
   0   2   2   38.95    5.24
   0   2   2   58.49    3.49
   0   2   3   10.18    3.37
   0   2   3   11.40    1.80
   0   2   3    7.11    2.22
   0   2   4 3220.78  107.54
   0   2   5   17.55    4.08
   0   2   5    9.06    2.15
   0   2   5   14.51    3.05
   0   2   6  823.74   35.21
   0   2   6  795.14   30.32
   0   2   6  748.06   31.83
   0   2   7   58.45    7.41
   0   2   7   43.95    5.48
   0   2   7   70.03    7.67
   0   2   8 1228.83   48.60
   0   2   8 1463.16   52.36
   0   2   9  528.74   27.51
   0   2   9  653.93   27.37
   0   2  10  227.51   16.81
   0   2  11  724.26   36.51
   0   2  12 1321.46   60.61
   0   2  13  529.01   35.20
   0   2  14   36.16    8.55
   0   2  14   29.00    8.31
   0   2  14   23.26    7.69
   0   2  14   35.20    9.25
   0   2  15  907.91   52.35
   0   2  15 1082.77   58.89
   0   2  15 1048.48   57.28
   0   2  15 1073.93   54.75
   0   2  16   19.82    6.37
   0   2  16   28.46    9.23
   0   2  17 1024.33   59.58
   0   2  18   -0.65    4.73
   0   2  19  204.13   24.38
   0   2  20   12.99    6.87
   0   2  21  338.26   29.50
   0   2  21  346.80   28.72
   0   2  22  101.99   14.36
   0   2  22  120.50   14.82
   0   2  23  199.13   16.77
   0   3  -6  266.46   17.78
   0   3  -6  272.25   19.23
   0   3  -5 1221.62   50.26
   0   3  -5 1335.09   54.40
   0   3  -4 1286.60   50.99
   0   3  -3 1950.14   70.85
   0   3  -2  644.56   30.76
   0   3  -1  836.61   36.95
   0   3   0  699.69   32.48
   0   3   1 1144.03   46.25
   0   3   2  930.17   39.73
   0   3   3    4.22    2.67
   0   3   4  640.38   23.67
   0   3   4  603.66   34.69
   0   3   5   12.47    4.82
   0   3   5    6.63    1.74
   0   3   6  334.28   23.37
   0   3   6  270.33   15.28
   0   3   6  333.75   18.81
   0   3   7  800.78   38.88
   0   3   7  739.89   32.82
   0   3   7  776.37   31.06
   0   3   8 2736.18   91.12
   0   3   8 2558.48   84.85
   0   3   8 2435.55   81.85
   0   3   9   34.53    6.95
   0   3   9   29.50    5.20
   0   3   9   34.33    6.36
   0   3   9   31.97    5.64
   0   3  10  752.44   33.52
   0   3  10  646.69   34.32
   0   3  11  571.13   32.33
   0   3  12  586.32   34.66
   0   3  13  195.06   19.42
   0   3  13  180.92   19.86
   0   3  14  854.66   47.68
   0   3  14  865.47   48.61
   0   3  14  918.13   51.68
   0   3  14 1002.07   54.39
   0   3  14  930.29   49.82
   0   3  14  829.09   56.91
   0   3  15 1440.71   69.67
   0   3  15 1495.77   72.13
   0   3  15 1618.63   76.73
   0   3  15 1592.27   75.14
   0   3  15 1514.59   71.53
   0   3  16    5.94    2.67
   0   3  16   12.05    6.42
   0   3  16   10.74    5.80
   0   3  17  999.92   58.31
   0   3  18   39.98   11.03
   0   3  19  497.31   38.55
   0   3  20   28.43    8.58
   0   3  21  257.90   23.61
   0   3  21  279.51   26.23
   0   3  22   45.08   10.05
   0   3  22   50.75    9.23
   0   3  23  332.21   24.03
   0   3  23  308.48   20.82
   0   4  -5  939.21   45.18
   0   4  -5 1083.16   51.40
   0   4  -4  538.22   30.74
   0   4  -4  568.71   34.99
   0   4  -3 2180.17   82.74
   0   4  -3 2246.41   89.26
   0   4  -2  436.95   26.80
   0   4  -1 1193.94   51.97
   0   4   0 1761.56   69.26
   0   4   1  340.97   23.02
   0   4   2 1194.85   53.58
   0   4   2 1422.71   63.52
   0   4   3    5.76    4.90
   0   4   3   10.18    3.89
   0   4   4  703.94   42.15
   0   4   5   13.77    5.88
   0   4   6 1142.83   42.55
   0   4   6 1385.92   62.76
   0   4   7  220.74   21.77
   0   4   7  189.02   12.97
   0   4   7  244.44   17.99
   0   4   8 2620.94   98.25
   0   4   8 2487.54   79.93
   0   4   8 2525.01   87.07
   0   4   9  517.44   35.71
   0   4   9  532.62   28.14
   0   4  10  922.32   47.77
   0   4  10  891.06   42.51
   0   4  11  124.48   14.52
   0   4  11  120.16   13.07
   0   4  12 1945.10   77.51
   0   4  13  270.72   23.65
   0   4  13  308.65   24.13
   0   4  13  304.61   27.89
   0   4  13  295.91   31.74
   0   4  14  531.58   35.74
   0   4  14  532.97   35.16
   0   4  14  568.50   39.55
   0   4  14  606.69   41.35
   0   4  14  539.22   45.54
   0   4  15 1212.37   60.84
   0   4  15 1303.63   66.08
   0   4  15 1097.58   63.39
   0   4  15 1264.18   61.41
   0   4  16  238.88   23.72
   0   4  16  270.29   27.48
   0   4  16  263.31   26.88
   0   4  16  217.81   22.81
   0   4  17  455.92   34.17
   0   4  17  462.58   37.18
   0   4  18  184.59   22.64
   0   4  19  315.73   29.25
   0   4  19  262.97   24.65
   0   4  20  129.87   17.77
   0   4  20   98.05   13.69
   0   4  21  529.18   36.33
   0   4  21  462.67   30.47
   0   4  22   26.30    6.95
   0   4  22   25.60    5.88
   0   4  23  218.00   18.71
   0   5  -5  546.35   37.86
   0   5  -4  202.52   21.78
   0   5  -3 2156.03   87.78
   0   5  -3 2381.86   98.04
   0   5  -2   10.50    5.96
   0   5  -2    9.55    5.08
   0   5  -1  668.62   38.18
   0   5  -1  644.51   43.16
   0   5   0   42.98   10.31
   0   5   0   41.87    8.89
   0   5   1  527.00   33.00
   0   5   1  505.76   37.91
   0   5   2  941.99   48.49
   0   5   2 1072.50   58.39
   0   5   3  255.59   26.36
   0   5   4 1173.28   63.98
   0   5   5  251.50   26.57
   0   5   6 1125.93   63.21
   0   5   7   48.30   11.47
   0   5   8 2730.09  117.64
   0   5   8 2848.56  104.19
   0   5   9   11.86    6.24
   0   5   9   19.34    6.40
   0   5  10 1147.70   66.94
   0   5  10 1466.77   62.87
   0   5  11  236.18   21.95
   0   5  12 1375.49   64.72
   0   5  12 1318.49   62.54
   0   5  12 1390.68   66.81
   0   5  12 1308.20   74.07
   0   5  13  342.66   27.83
   0   5  13  356.96   35.81
   0   5  13  367.42   30.76
   0   5  14  383.15   29.56
   0   5  14  287.68   29.16
   0   5  15  696.80   42.41
   0   5  15  722.74   46.97
   0   5  16   37.41    8.74
   0   5  16   19.63    7.79
   0   5  16   16.32    7.06
   0   5  17   83.39   13.78
   0   5  17   88.18   15.44
   0   5  18  137.58   17.41
   0   5  18  134.20   19.05
   0   5  18  115.93   14.79
   0   5  19  195.05   22.55
   0   5  19  158.53   16.88
   0   5  20   62.80   12.02
   0   5  21  280.89   25.03
   0   5  22    0.83    3.27
   0   5  23  395.50   25.19
   0   6  -4  122.14   19.06
   0   6  -3 1063.94   62.64
   0   6  -2    3.44    3.10
   0   6  -1  949.20   59.20
   0   6   0  436.41   37.85
   0   6   1  696.98   49.64
   0   6   2  948.63   59.95
   0   6   3   83.33   16.40
   0   6   4 1716.15   87.88
   0   6   5  233.38   28.28
   0   6   6  705.40   51.87
   0   6   7  243.58   29.37
   0   6   8 1571.28   87.22
   0   6   8 1694.28   74.00
   0   6   9   15.56    6.56
   0   6   9   39.78    9.42
   0   6  10  750.83   44.31
   0   6  10  761.52   50.23
   0   6  10  780.53   45.75
   0   6  11   12.72    7.06
   0   6  11    6.34    4.99
   0   6  11    7.67    5.13
   0   6  11    8.94    7.38
   0   6  11    2.75    3.25
   0   6  12 1129.25   58.88
   0   6  12 1010.19   54.54
   0   6  12 1010.01   57.43
   0   6  13  109.53   15.63
   0   6  13  106.49   16.76
   0   6  14  148.15   18.51
   0   6  14  159.70   20.60
   0   6  15  197.96   21.40
   0   6  15  164.33   21.70
   0   6  16  113.78   15.54
   0   6  16   83.22   15.90
   0   6  16  119.09   19.04
   0   6  17  107.79   15.37
   0   6  17   98.09   16.46
   0   6  17  107.90   17.35
   0   6  18  124.15   16.27
   0   6  18  137.73   19.10
   0   6  19  317.76   28.75
   0   6  20   49.63   10.50
   0   6  21  264.56   23.30
   0   6  22   27.32    6.63
   0   7  -3 1472.73   81.57
   0   7  -2   -4.35    5.39
   0   7  -1  509.73   44.56
   0   7   0  432.20   40.96
   0   7   1 2024.06  102.99
   0   7   2  869.73   61.23
   0   7   3  107.49   20.43
   0   7   4  390.60   39.27
   0   7   5  202.26   28.22
   0   7   6  575.49   49.49
   0   7   6  557.40   39.03
   0   7   7   77.18   18.06
   0   7   7   98.28   15.15
   0   7   8 1024.68   71.43
   0   7   8 1111.82   59.09
   0   7   8 1041.16   58.10
   0   7   9  272.49   34.65
   0   7   9  316.48   28.80
   0   7   9  318.33   29.16
   0   7  10 1013.75   55.93
   0   7  10  908.05   51.47
   0   7  10  917.46   54.22
   0   7  11   16.27    9.34
   0   7  11   10.75    5.30
   0   7  11    3.00    4.16
   0   7  11    3.56    4.95
   0   7  12  567.49   41.98
   0   7  12  569.09   39.41
   0   7  12  570.70   41.88
   0   7  13   -1.09    2.59
   0   7  13    1.52    4.84
   0   7  14  631.81   41.47
   0   7  14  589.91   43.66
   0   7  15   10.29    5.28
   0   7  15   17.78    7.69
   0   7  16  356.67   29.06
   0   7  16  333.81   31.95
   0   7  16  382.73   33.24
   0   7  17  133.82   16.89
   0   7  17  138.03   18.79
   0   7  17  128.93   18.46
   0   7  18  150.12   19.54
   0   7  19  221.63   22.71
   0   7  20  117.32   15.13
   0   7  21  162.86   16.49
   0   7  22   71.32    9.49
   0   8  -2    2.91    7.77
   0   8  -1 1044.52   71.49
   0   8   0   68.51   17.78
   0   8   1  690.72   57.04
   0   8   2  210.52   30.42
   0   8   3  211.57   31.22
   0   8   3  255.01   26.24
   0   8   4  575.49   51.77
   0   8   4  503.92   39.18
   0   8   5  386.46   42.53
   0   8   5  400.20   34.31
   0   8   6  239.50   32.89
   0   8   6  191.31   23.17
   0   8   7  380.53   42.97
   0   8   7  378.65   33.60
   0   8   8  696.02   59.87
   0   8   8  696.94   47.49
   0   8   8  716.54   48.49
   0   8   9    3.61    6.10
   0   8   9   21.85    7.70
   0   8   9   28.94   10.07
   0   8  10  249.73   35.91
   0   8  10  304.36   30.14
   0   8  10  274.35   26.94
   0   8  10  269.83   28.34
   0   8  11   68.10   12.99
   0   8  11   49.32   11.17
   0   8  12  956.59   53.65
   0   8  12  834.06   54.93
   0   8  13    5.16    3.27
   0   8  13    7.58    6.92
   0   8  14  691.92   43.66
   0   8  14  648.64   45.89
   0   8  15   -0.54    3.71
   0   8  15    8.18    6.50
   0   8  16  623.61   38.57
   0   8  16  570.19   41.25
   0   8  17   60.27   11.39
   0   8  17   92.59   15.58
   0   8  18  157.75   19.14
   0   8  19  126.60   16.03
   0   8  20  148.21   15.77
   0   8  21  192.60   16.47
   0   9   1  767.80   50.36
   0   9   2   21.25    6.93
   0   9   3  534.21   41.12
   0   9   4   58.84   13.53
   0   9   5 1012.12   60.61
   0   9   6  207.18   24.74
   0   9   7  426.22   36.82
   0   9   8  153.45   21.36
   0   9   9  347.00   32.81
   0   9  10  231.14   24.34
   0   9  10  201.35   24.75
   0   9  11   23.70    8.96
   0   9  11   15.80    6.66
   0   9  12  610.21   40.64
   0   9  12  566.92   42.98
   0   9  13   20.72    7.12
   0   9  13   21.49    6.90
   0   9  14  606.62   38.31
   0   9  14  542.97   40.44
   0   9  15   10.91    6.49
   0   9  15    6.80    5.62
   0   9  16  350.18   29.14
   0   9  17   51.94   10.82
   0   9  18  260.39   22.67
   0   9  19   64.20    9.92
   0   9  20  181.21   15.29
   0  10  -2   58.45   12.19
   0  10  -1  509.76   38.01
   0  10   0   49.73   11.49
   0  10   1  342.36   30.96
   0  10   2    2.64    6.75
   0  10   3  501.42   38.91
   0  10   4   81.15   14.47
   0  10   5  559.70   41.77
   0  10   6    9.38    3.99
   0  10   7  245.29   26.42
   0  10   8  164.44   21.39
   0  10   9  167.32   19.97
   0  10   9  154.62   20.82
   0  10  10   76.38   12.88
   0  10  10   67.18   13.51
   0  10  11   22.31    7.29
   0  10  11   33.35    9.60
   0  10  12  366.69   28.12
   0  10  12  320.80   29.40
   0  10  13    7.08    4.51
   0  10  13    0.83    4.99
   0  10  14  401.11   30.94
   0  10  15    9.04    5.11
   0  10  16  456.90   31.34
   0  10  16  440.35   28.97
   0  10  17   30.37    6.95
   0  10  18  250.57   19.06
   0  11  -7  143.62   12.97
   0  11  -6  111.35   12.39
   0  11  -5   90.14   11.77
   0  11  -4   76.83   11.37
   0  11  -3  234.50   21.13
   0  11  -2   40.05    8.96
   0  11  -1  203.59   20.76
   0  11   0    8.51    4.32
   0  11   1  254.73   24.19
   0  11   2    3.67    3.10
   0  11   3  266.72   25.13
   0  11   4   17.46    6.58
   0  11   5  477.28   35.24
   0  11   6   43.78    9.92
   0  11   7  286.93   25.98
   0  11   8  132.65   15.92
   0  11   8  141.73   17.89
   0  11   9  242.60   21.52
   0  11   9  216.45   22.35
   0  11  10  353.49   25.56
   0  11  10  322.13   27.20
   0  11  11   70.36   10.45
   0  11  11   65.14   11.25
   0  11  12  271.75   23.28
   0  11  13   93.79   12.62
   0  11  14  326.64   23.59
   0  11  15    0.47    1.85
   0  11  16  306.28   20.55
   0  12  -3  124.96   11.40
   0  12  -2   65.20    8.73
   0  12  -1  260.36   19.10
   0  12   0   27.30    6.08
   0  12   1  259.36   20.11
   0  12   2    4.50    2.61
   0  12   3  269.24   21.24
   0  12   4    0.25    1.94
   0  12   5  215.70   17.59
   0  12   5  212.79   18.70
   0  12   6    6.42    3.58
   0  12   6   -0.76    2.97
   0  12   7  200.45   16.55
   0  12   7  228.77   19.14
   0  12   8   55.25    8.02
   0  12   8   38.61    7.43
   0  12   9  280.26   18.08
   0  12   9  221.70   18.82
   0  12  10   84.62   10.66
   0  12  11  206.40   16.51
   0  12  12  145.98   12.78
   1 -11   2  368.44   23.45
   1 -11   3   -3.21    2.41
   1 -11   4  379.09   23.02
   1 -11   5    8.02    3.02
   1 -11   6  270.07   16.90
   1 -10   0  373.58   28.38
   1 -10   1  231.25   22.29
   1 -10   2  498.75   34.11
   1 -10   3   89.05   13.27
   1 -10   4  641.13   38.94
   1 -10   5    6.52    3.79
   1 -10   6  357.91   26.01
   1 -10   7   21.38    6.20
   1 -10   8  357.74   23.55
   1 -10   9   68.97    8.88
   1  -9  -1  250.95   23.60
   1  -9   0   87.17   14.89
   1  -9   1  398.81   32.21
   1  -9   2  263.45   25.72
   1  -9   3   91.85   15.11
   1  -9   4  473.94   36.11
   1  -9   5   33.89    8.63
   1  -9   6  455.26   34.28
   1  -9   7   16.02    6.48
   1  -9   8  337.25   27.21
   1  -9   9   12.55    4.51
   1  -9  10  209.29   18.58
   1  -9  11   58.47    8.52
   1  -9  12  147.24   12.33
   1  -8  -1  585.23   38.82
   1  -8   0  323.53   28.24
   1  -8   1  566.45   39.68
   1  -8   2  295.42   28.19
   1  -8   3  195.81   22.59
   1  -8   4  504.63   38.35
   1  -8   5    9.54    6.11
   1  -8   6  524.96   39.49
   1  -8   7   50.29   10.13
   1  -8   8  688.52   45.57
   1  -8   9   20.16    6.67
   1  -8  10  370.60   29.61
   1  -8  11   69.98   11.48
   1  -8  12  392.42   27.05
   1  -8  13   30.63    6.25
   1  -8  14   69.26    8.06
   1  -7   0  205.76   21.27
   1  -7   1  850.68   49.21
   1  -7   2  664.52   43.02
   1  -7   3  309.50   28.66
   1  -7   4  304.51   28.59
   1  -7   5  210.13   23.84
   1  -7   6  237.55   25.76
   1  -7   7  154.24   20.62
   1  -7   8  550.06   41.16
   1  -7   9    6.73    4.93
   1  -7  10  688.29   41.63
   1  -7  10  693.93   45.80
   1  -7  11   26.34    7.43
   1  -7  11   40.94   10.49
   1  -7  12  452.13   30.93
   1  -7  12  443.69   32.88
   1  -7  13   37.85    8.39
   1  -7  13   30.13    7.20
   1  -7  14  330.59   22.69
   1  -7  14  323.92   23.68
   1  -7  15   52.04    7.66
   1  -7  15   50.14    7.46
   1  -6   4 1390.50   68.28
   1  -6   5  627.98   42.33
   1  -6   6  301.17   28.60
   1  -6   7   28.06    8.45
   1  -6   7   29.07    8.74
   1  -6   8 1165.76   59.73
   1  -6   8 1160.34   64.21
   1  -6   9   32.48    8.79
   1  -6   9   30.11   10.05
   1  -6  10 1141.38   61.56
   1  -6  10 1247.96   66.82
   1  -6  11    8.36    6.20
   1  -6  11   -0.73    4.31
   1  -6  12  824.17   49.62
   1  -6  12  873.73   52.31
   1  -6  13   33.75    8.76
   1  -6  13   38.97    9.16
   1  -6  14  234.52   22.62
   1  -6  14  257.84   23.30
   1  -6  15    7.91    3.23
   1  -6  15    3.58    3.05
   1  -6  16  379.82   25.33
   1  -6  16  366.19   23.16
   1  -6  17  107.43   11.23
   1  -5   7  101.35   15.72
   1  -5   8  699.74   43.64
   1  -5   8  767.23   48.22
   1  -5   9  853.58   50.49
   1  -5   9  901.39   54.22
   1  -5  10  820.47   50.80
   1  -5  10  927.35   55.30
   1  -5  11   74.08   14.25
   1  -5  11   74.52   14.26
   1  -5  12  410.04   34.50
   1  -5  12  425.33   35.47
   1  -5  13   26.06    7.98
   1  -5  13   48.64   11.44
   1  -5  14  712.11   46.46
   1  -5  14  763.50   46.83
   1  -5  15    4.30    2.99
   1  -5  15   11.82    4.86
   1  -5  16  380.87   29.16
   1  -5  16  334.53   25.24
   1  -5  17   33.37    7.59
   1  -5  18  197.30   17.00
   1  -5  19  157.31   12.64
   1  -4   6  728.62   42.23
   1  -4   7  171.78   19.54
   1  -4   8  530.65   37.61
   1  -4   9  441.76   34.88
   1  -4   9  411.54   32.17
   1  -4   9  466.82   34.94
   1  -4  10  362.67   30.79
   1  -4  10  357.76   33.50
   1  -4  10  364.80   31.70
   1  -4  11  318.09   29.71
   1  -4  11  375.32   32.61
   1  -4  12  481.23   38.12
   1  -4  12  495.26   38.34
   1  -4  13  120.75   18.13
   1  -4  13   88.64   14.95
   1  -4  14  296.67   28.86
   1  -4  14  187.31   22.21
   1  -4  15    0.47    3.85
   1  -4  15   14.78    6.09
   1  -4  16 1016.23   57.43
   1  -4  16 1013.45   52.39
   1  -4  17   93.44   14.53
   1  -4  18  204.79   20.18
   1  -4  19   76.19   10.71
   1  -4  20  183.30   14.42
   1  -3   2 1003.01   33.47
   1  -3   3 2689.39   84.83
   1  -3   4  252.44   14.14
   1  -3   4  253.84   19.53
   1  -3   5 2313.76   77.65
   1  -3   5 2241.75   86.90
   1  -3   6  551.07   26.92
   1  -3   6  539.15   33.07
   1  -3   7  245.79   17.36
   1  -3   7  224.41   20.80
   1  -3   8  745.58   36.50
   1  -3   8  716.62   42.55
   1  -3   9  816.07   40.72
   1  -3   9  791.63   47.06
   1  -3  10  394.55   27.17
   1  -3  10  405.59   32.58
   1  -3  10  355.43   29.82
   1  -3  11  135.88   15.79
   1  -3  11  124.75   18.21
   1  -3  11  128.65   17.98
   1  -3  11  136.37   17.95
   1  -3  12  786.58   44.68
   1  -3  12  718.90   48.73
   1  -3  12  777.05   49.37
   1  -3  12  777.24   48.37
   1  -3  13  246.40   23.71
   1  -3  13  234.25   26.43
   1  -3  13  259.55   27.03
   1  -3  13  193.43   22.66
   1  -3  14  442.20   36.62
   1  -3  14  368.01   31.35
   1  -3  14  365.02   30.40
   1  -3  15    6.17    5.52
   1  -3  15   -6.30    4.24
   1  -3  16  338.07   31.95
   1  -3  17   -5.27    6.21
   1  -3  18  610.87   40.28
   1  -3  18  589.09   34.76
   1  -3  19  102.17   14.14
   1  -3  19  100.24   11.62
   1  -3  20  284.41   21.69
   1  -3  21   42.87    6.61
   1  -2   2 7091.13  210.14
   1  -2   3 4935.47  151.47
   1  -2   3 5104.37  159.33
   1  -2   4  678.66   28.19
   1  -2   4  728.53   34.06
   1  -2   5 4242.45  136.16
   1  -2   5 4441.42  143.78
   1  -2   6  949.49   44.68
   1  -2   7  898.10   44.48
   1  -2   8  111.37   12.30
   1  -2   8  121.83   14.62
   1  -2   9 1075.10   48.75
   1  -2   9 1030.83   52.96
   1  -2  10  904.35   45.43
   1  -2  10  878.00   49.31
   1  -2  11   67.59   12.57
   1  -2  11   77.59   12.15
   1  -2  12  812.24   49.91
   1  -2  12  815.52   46.09
   1  -2  12  785.14   49.06
   1  -2  12  746.04   48.94
   1  -2  12  862.43   47.57
   1  -2  13   48.41   10.69
   1  -2  13   38.54   10.26
   1  -2  13   50.14   10.84
   1  -2  13   51.77   12.70
   1  -2  13   39.06    9.06
   1  -2  13   52.19   11.06
   1  -2  14  208.44   24.82
   1  -2  14  225.31   23.35
   1  -2  14  182.52   22.82
   1  -2  14  163.23   22.67
   1  -2  14  134.57   18.47
   1  -2  15    3.09    6.20
   1  -2  15   -1.71    5.21
   1  -2  15   -0.96    3.49
   1  -2  16  746.62   50.62
   1  -2  17    1.22    2.82
   1  -2  18  371.71   32.33
   1  -2  19   31.14    8.77
   1  -2  19   23.02    6.64
   1  -2  20  541.52   34.18
   1  -2  20  509.35   30.69
   1  -2  21   75.23   10.23
   1  -2  21   55.03    7.73
   1  -1   2    4.04    1.55
   1  -1   3 5328.05  161.63
   1  -1   3 5375.22  165.68
   1  -1   4  312.26   15.93
   1  -1   4  313.77   18.20
   1  -1   5 1722.71   63.88
   1  -1   6   87.53   10.07
   1  -1   7 2976.47  104.77
   1  -1   8    2.35    1.92
   1  -1   9 1450.65   61.94
   1  -1   9 1577.76   65.92
   1  -1  10   81.12   11.63
   1  -1  10   75.75   11.91
   1  -1  11  265.29   22.80
   1  -1  11  250.94   23.29
   1  -1  12  656.67   40.68
   1  -1  12  751.99   44.31
   1  -1  12  619.94   41.15
   1  -1  13  382.06   32.85
   1  -1  13  379.91   30.69
   1  -1  13  387.14   31.65
   1  -1  13  308.93   29.23
   1  -1  13  409.49   30.77
   1  -1  14  394.81   34.37
   1  -1  14  420.54   33.66
   1  -1  14  429.25   35.73
   1  -1  14  415.44   32.31
   1  -1  15   19.32    8.04
   1  -1  15   22.67    7.63
   1  -1  15   32.53    9.92
   1  -1  15   19.29    7.97
   1  -1  16  648.23   45.84
   1  -1  16  659.59   47.19
   1  -1  17  130.50   20.17
   1  -1  17  120.00   18.68
   1  -1  18  912.37   55.19
   1  -1  18  844.10   56.39
   1  -1  19    3.88    4.51
   1  -1  20  600.59   38.53
   1  -1  20  581.53   37.03
   1  -1  21   11.49    4.93
   1  -1  21   10.44    4.48
   1  -1  22  194.78   15.43
   1  -1  22  213.64   15.95
   1   0   2 2079.05   65.10
   1   0   3 2048.14   64.55
   1   0   3 1961.37   64.42
   1   0   4 1134.36   40.24
   1   0   4 1095.74   40.50
   1   0   5 1395.41   49.28
   1   0   5 1313.33   49.25
   1   0   6   34.10    5.49
   1   0   6   31.47    5.20
   1   0   7  600.38   29.91
   1   0   7  651.40   30.78
   1   0   8   49.75    7.87
   1   0   8   67.07    8.96
   1   0   9 1056.61   48.38
   1   0   9 1116.77   49.08
   1   0  10    7.82    3.36
   1   0  10   20.61    5.66
   1   0  11  752.31   40.50
   1   0  11  603.43   37.20
   1   0  12  449.97   31.80
   1   0  12  400.36   30.03
   1   0  13  503.21   37.18
   1   0  13  526.68   36.35
   1   0  13  475.10   34.88
   1   0  14  213.83   24.13
   1   0  14  213.22   23.45
   1   0  14  210.24   23.29
   1   0  14  212.47   21.60
   1   0  15  202.67   23.91
   1   0  15  239.17   25.35
   1   0  15  171.51   21.90
   1   0  15  134.19   17.70
   1   0  16  757.72   48.82
   1   0  16  736.37   49.18
   1   0  17  191.59   23.82
   1   0  17  205.84   25.02
   1   0  17  185.99   21.05
   1   0  18  559.52   41.50
   1   0  18  553.49   43.55
   1   0  19   24.22    7.88
   1   0  19   20.96    8.94
   1   0  20  589.95   38.96
   1   0  20  584.60   42.63
   1   0  20  604.64   40.30
   1   0  21    8.62    4.25
   1   0  21    5.10    2.73
   1   0  22  241.79   19.73
   1   0  23    1.60    1.68
   1   1  -4 2572.00   77.02
   1   1  -3 1610.39   50.48
   1   1  -2  671.58   24.17
   1   1  -1  134.49    7.95
   1   1   0 1510.27   50.03
   1   1   1 2927.45   90.57
   1   1   1 2863.34   85.91
   1   1   2  720.51   28.62
   1   1   2  769.22   25.76
   1   1   3   37.27    4.55
   1   1   4   19.75    2.53
   1   1   4   23.51    3.71
   1   1   5 3713.12  118.03
   1   1   5 4051.72  120.86
   1   1   6    6.82    2.24
   1   1   6    5.55    1.93
   1   1   6    8.19    2.84
   1   1   7 1146.62   42.81
   1   1   7 1155.10   41.45
   1   1   8   14.25    3.38
   1   1   8   16.81    3.27
   1   1   8   22.41    5.15
   1   1   9  857.96   40.21
   1   1   9 1054.64   44.79
   1   1  10   24.44    5.62
   1   1  10   26.57    6.24
   1   1  11  758.29   42.51
   1   1  11  925.17   43.40
   1   1  12  465.33   32.18
   1   1  13 1242.69   61.90
   1   1  13 1210.15   60.37
   1   1  14  338.04   28.61
   1   1  14  326.55   28.83
   1   1  14  341.77   29.70
   1   1  14  368.50   30.44
   1   1  14  388.14   29.24
   1   1  15  307.64   28.73
   1   1  15  364.09   31.91
   1   1  15  300.97   28.53
   1   1  15  331.71   28.07
   1   1  16   63.60   12.90
   1   1  16   89.37   15.73
   1   1  16  108.61   17.41
   1   1  16   62.57   11.87
   1   1  17  423.47   34.98
   1   1  17  438.11   33.82
   1   1  18  649.59   44.71
   1   1  18  678.90   43.29
   1   1  19   16.59    6.67
   1   1  19   12.79    4.70
   1   1  19   14.92    6.88
   1   1  20  396.89   29.87
   1   1  20  371.97   33.53
   1   1  20  396.30   32.98
   1   1  21   -0.36    4.40
   1   1  21    5.75    4.57
   1   1  22  189.80   18.77
   1   1  23   -2.59    2.56
   1   2  -5    9.66    1.80
   1   2  -3  245.78   14.13
   1   2  -2 4558.30  142.46
   1   2  -1  176.56   12.19
   1   2   0  652.70   28.88
   1   2   1 1732.27   61.91
   1   2   2 5058.80  159.36
   1   2   3 2930.64  104.98
   1   2   3 3355.84   99.76
   1   2   4  613.15   28.42
   1   2   4  565.43   23.38
   1   2   4  544.06   22.92
   1   2   5 2445.49   73.49
   1   2   5 2478.36   80.50
   1   2   5 2428.51   79.94
   1   2   6  614.76   22.64
   1   2   6  614.09   27.41
   1   2   6  616.73   27.40
   1   2   6  658.38   29.94
   1   2   7  192.43   13.79
   1   2   7  179.28   12.98
   1   2   8   84.54    7.82
   1   2   8  121.76   10.77
   1   2   8  114.60   10.98
   1   2   9 1497.44   51.31
   1   2   9 1390.29   54.47
   1   2  10   68.98    9.85
   1   2  11 1509.86   64.58
   1   2  12  404.19   28.88
   1   2  13  393.33   29.87
   1   2  14   69.63   12.30
   1   2  14   58.86   11.75
   1   2  14   90.70   14.43
   1   2  14   79.89   12.83
   1   2  15 1192.53   62.29
   1   2  15 1234.05   65.08
   1   2  15 1221.99   64.13
   1   2  15 1269.09   62.13
   1   2  16  605.32   41.75
   1   2  16  639.92   44.69
   1   2  16  599.71   42.78
   1   2  16  596.46   40.05
   1   2  17  856.57   52.33
   1   2  17  656.64   43.72
   1   2  18  355.04   32.14
   1   2  18  238.17   24.58
   1   2  19   53.80   12.75
   1   2  19   53.76   11.45
   1   2  20  303.08   29.22
   1   2  20  292.95   28.09
   1   2  21    4.47    3.71
   1   2  21    3.86    4.63
   1   2  22  117.00   14.94
   1   2  22  134.38   17.11
   1   2  23   33.29    6.93
   1   3  -5   59.85    7.61
   1   3  -4 1539.80   59.29
   1   3  -3  219.34   16.57
   1   3  -2  872.44   40.07
   1   3  -1   43.38    7.35
   1   3   0 2093.21   78.11
   1   3   1 1110.20   48.45
   1   3   2 2507.01   91.04
   1   3   3   18.79    5.23
   1   3   4  676.30   35.16
   1   3   5 1675.61   66.22
   1   3   5 1622.70   49.58
   1   3   5 1592.26   57.60
   1   3   5 1628.06   55.87
   1   3   6  222.44    9.12
   1   3   6  227.52   18.65
   1   3   6  216.36   14.64
   1   3   6  229.17   14.10
   1   3   7 1525.15   48.04
   1   3   7 1625.16   63.97
   1   3   7 1463.12   55.45
   1   3   7 1425.99   56.43
   1   3   8    5.69    2.71
   1   3   8    5.46    2.33
   1   3   9  952.59   47.33
   1   3   9 1309.54   49.48
   1   3  10  231.67   18.19
   1   3  10  240.84   18.68
   1   3  11  506.27   30.61
   1   3  12   97.31   12.77
   1   3  13 2340.43   93.14
   1   3  13 2251.87   92.40
   1   3  13 2323.22   94.79
   1   3  14  153.10   22.24
   1   3  14  185.94   19.90
   1   3  14  198.18   20.92
   1   3  14  190.88   20.86
   1   3  14  194.58   19.97
   1   3  15 1095.64   57.44
   1   3  15 1081.37   58.32
   1   3  15 1070.65   58.57
   1   3  15 1066.54   65.45
   1   3  15 1038.03   55.85
   1   3  16  572.22   39.81
   1   3  16  668.66   43.83
   1   3  16  623.58   42.66
   1   3  16  595.24   39.83
   1   3  17 1360.93   67.91
   1   3  17 1467.93   71.93
   1   3  17 1251.62   64.43
   1   3  18  751.88   47.94
   1   3  18  511.57   38.32
   1   3  19   65.92   13.43
   1   3  19   66.21   13.65
   1   3  20   38.34   10.58
   1   3  20   52.63   10.80
   1   3  21   33.22    9.76
   1   3  21   35.04    8.44
   1   3  22  297.98   25.81
   1   3  22  248.63   21.93
   1   3  23    9.13    4.74
   1   3  23   10.05    4.17
   1   4  -5  157.62   15.79
   1   4  -4 1162.26   54.06
   1   4  -3  139.99   15.53
   1   4  -2 2215.01   87.69
   1   4  -1   81.77   12.02
   1   4   0 1113.58   53.96
   1   4   1   67.16   11.14
   1   4   2 1408.17   63.98
   1   4   3  164.74   17.70
   1   4   4 3512.24  128.47
   1   4   5 1738.86   75.03
   1   4   6  828.46   45.45
   1   4   6  789.17   36.11
   1   4   7 1493.95   67.32
   1   4   7 1386.02   56.86
   1   4   7 1483.15   54.27
   1   4   8  109.61   14.68
   1   4   8  117.04   12.20
   1   4   8  136.43   11.91
   1   4   9 2009.78   78.66
   1   4   9 2121.78   76.43
   1   4  10  921.43   43.43
   1   4  10  923.89   41.43
   1   4  11  506.48   30.35
   1   4  11  519.55   32.86
   1   4  12  156.72   16.21
   1   4  13 1166.00   56.36
   1   4  13 1165.77   58.03
   1   4  13 1143.73   67.70
   1   4  13 1230.88   59.16
   1   4  14    7.20    5.57
   1   4  14    1.85    5.45
   1   4  14   -2.80    4.38
   1   4  14   -1.68    3.74
   1   4  14    4.93    4.35
   1   4  15  872.61   50.03
   1   4  15  866.19   49.31
   1   4  15  918.68   53.12
   1   4  15  855.16   49.85
   1   4  15  848.02   59.45
   1   4  16  170.70   20.58
   1   4  16  181.82   25.73
   1   4  16  186.84   21.23
   1   4  16  183.95   22.47
   1   4  16  189.63   21.60
   1   4  17  282.52   27.08
   1   4  17  293.01   28.54
   1   4  17  233.89   29.21
   1   4  17  219.41   23.50
   1   4  18   84.17   14.35
   1   4  18  102.19   16.56
   1   4  18   90.91   14.64
   1   4  19  223.26   24.95
   1   4  19  219.22   22.78
   1   4  20  171.59   20.80
   1   4  20  165.53   18.72
   1   4  21   84.20   13.64
   1   4  21   62.67   10.94
   1   4  22  211.47   18.77
   1   4  22  252.43   23.10
   1   4  23   59.78    9.69
   1   4  23   46.76    7.30
   1   5  -4 1772.70   78.81
   1   5  -3   30.80    8.08
   1   5  -2  574.83   38.92
   1   5  -1   55.37   11.46
   1   5   0  678.78   43.49
   1   5   1  402.82   32.23
   1   5   2 1232.62   64.04
   1   5   3   65.16   12.84
   1   5   4 1636.64   78.37
   1   5   5 1384.77   70.09
   1   5   6  662.47   44.46
   1   5   7  840.90   51.77
   1   5   7  852.49   41.50
   1   5   8  126.60   18.29
   1   5   8  107.64   12.77
   1   5   9  753.90   48.51
   1   5   9  727.34   39.55
   1   5  10  679.79   38.78
   1   5  11  630.15   37.15
   1   5  11  546.56   38.56
   1   5  11  507.90   30.72
   1   5  12    4.46    2.25
   1   5  12   11.93    6.16
   1   5  12    3.52    3.41
   1   5  12    6.84    3.89
   1   5  13 1094.34   53.53
   1   5  13 1164.43   58.26
   1   5  13 1096.28   66.58
   1   5  14    5.87    4.06
   1   5  14    6.16    5.52
   1   5  14    8.76    7.19
   1   5  14    0.58    4.80
   1   5  15  236.33   23.78
   1   5  15  218.88   21.80
   1   5  15  166.84   18.80
   1   5  15  236.81   25.10
   1   5  15  239.87   30.25
   1   5  16    6.14   11.36
   1   5  16    5.39    5.30
   1   5  16   -1.52    4.98
   1   5  16    9.58    4.32
   1   5  17  255.40   25.58
   1   5  17  305.97   29.42
   1   5  17  331.17   36.21
   1   5  18   58.81   11.65
   1   5  18   60.32   12.68
   1   5  18   45.33    9.77
   1   5  19  219.24   22.51
   1   5  19  213.40   23.92
   1   5  19  164.79   18.38
   1   5  20  107.76   13.97
   1   5  20  157.32   19.64
   1   5  21  151.71   15.41
   1   5  21  185.94   20.19
   1   5  22  275.26   23.51
   1   5  22  249.64   18.21
   1   5  23   60.48    9.59
   1   6  -4  274.78   27.75
   1   6  -3  236.12   25.63
   1   6  -2 2556.63  110.92
   1   6  -1   -2.15    3.69
   1   6   0  555.38   42.56
   1   6   1    3.08    3.61
   1   6   2 1079.83   64.02
   1   6   3  668.62   48.37
   1   6   4 1256.51   71.21
   1   6   5  518.89   42.47
   1   6   6  449.28   39.73
   1   6   7  358.40   35.35
   1   6   7  374.62   27.19
   1   6   8  122.21   20.33
   1   6   8  169.01   17.74
   1   6   9  868.94   58.15
   1   6   9  781.86   44.64
   1   6  10  592.52   46.35
   1   6  10  648.03   43.51
   1   6  11  807.50   47.12
   1   6  11  774.53   46.07
   1   6  11  827.72   53.27
   1   6  11  843.83   48.05
   1   6  12   12.58    6.52
   1   6  12   18.30    6.54
   1   6  12   17.81    5.79
   1   6  12   18.98    8.15
   1   6  13  794.06   47.22
   1   6  13  749.22   46.90
   1   6  13  749.56   54.60
   1   6  14  145.17   18.84
   1   6  14  162.78   24.50
   1   6  15  498.41   36.85
   1   6  15  470.67   44.19
   1   6  16   20.28   11.69
   1   6  16   12.50    4.73
   1   6  16   10.93    5.15
   1   6  17  612.63   41.69
   1   6  17  632.67   44.72
   1   6  18   16.63    7.34
   1   6  18   11.59    5.29
   1   6  19  499.85   35.16
   1   6  19  502.36   37.60
   1   6  20  115.92   16.49
   1   6  21  244.33   22.93
   1   6  22   71.44   10.93
   1   6  23  106.60   11.95
   1   7  -3  264.94   29.95
   1   7  -2  475.52   41.50
   1   7  -1  313.36   33.42
   1   7   0 1541.09   84.57
   1   7   1   -1.56    3.64
   1   7   2  835.00   59.20
   1   7   3   45.17   13.47
   1   7   4  606.36   50.11
   1   7   5  295.75   34.38
   1   7   6  464.81   43.94
   1   7   7   66.38   16.06
   1   7   7   65.86   12.13
   1   7   8  658.08   55.65
   1   7   8  792.19   46.42
   1   7   8  761.40   46.33
   1   7   8  706.53   47.02
   1   7   8  816.10   48.16
   1   7   9  681.50   55.50
   1   7   9  650.06   42.31
   1   7   9  637.89   44.92
   1   7   9  641.60   42.29
   1   7  10  608.10   52.03
   1   7  10  540.03   38.76
   1   7  10  537.47   38.24
   1   7  10  538.01   38.73
   1   7  10  505.58   40.65
   1   7  11  419.70   34.21
   1   7  11  443.39   34.09
   1   7  11  374.24   32.32
   1   7  11  432.03   38.02
   1   7  12  347.54   31.55
   1   7  12  373.47   31.60
   1   7  12  362.50   35.54
   1   7  12  372.92   31.91
   1   7  13  933.73   54.36
   1   7  13  919.67   61.43
   1   7  13  961.30   55.93
   1   7  14   92.58   15.77
   1   7  14  116.59   20.45
   1   7  14  129.52   18.67
   1   7  15  466.75   35.86
   1   7  16   -0.17    2.88
   1   7  16    2.38    5.83
   1   7  17  507.42   36.83
   1   7  17  532.24   40.65
   1   7  18    4.10    2.75
   1   7  18   -2.61    5.09
   1   7  19  403.51   30.02
   1   7  19  483.78   35.57
   1   7  20   39.41    8.00
   1   7  20   41.31    9.56
   1   7  21  263.68   22.73
   1   7  22   62.68    9.68
   1   8  -2 1006.38   67.50
   1   8  -1  153.08   24.89
   1   8   0  604.18   51.76
   1   8   1  147.08   25.11
   1   8   2 1062.66   72.89
   1   8   2 1117.82   56.19
   1   8   3   13.24    9.20
   1   8   3   -0.41    3.53
   1   8   3   10.73    5.20
   1   8   4  911.59   67.21
   1   8   4  884.83   53.51
   1   8   4  942.98   51.72
   1   8   5    8.19    8.93
   1   8   5    0.81    4.60
   1   8   5   -2.68    5.80
   1   8   6 1520.11   92.83
   1   8   6 1514.25   76.25
   1   8   6 1585.07   74.87
   1   8   7   28.00   10.93
   1   8   7   18.71    6.99
   1   8   7   35.06   10.17
   1   8   8  272.81   36.08
   1   8   8  292.42   28.56
   1   8   8  298.55   28.84
   1   8   8  316.05   29.61
   1   8   9  157.91   26.75
   1   8   9  211.40   23.58
   1   8   9  167.34   21.39
   1   8  10 1020.42   74.39
   1   8  10  965.69   57.98
   1   8  10  986.96   57.26
   1   8  10  953.71   56.92
   1   8  11  315.57   31.00
   1   8  11  290.90   28.41
   1   8  11  298.25   29.06
   1   8  12  282.87   28.23
   1   8  12  289.01   28.85
   1   8  13  328.74   29.83
   1   8  13  262.33   27.72
   1   8  14  183.65   21.85
   1   8  14  146.78   20.27
   1   8  15  509.60   37.58
   1   8  16   50.92   10.73
   1   8  16   62.10   13.60
   1   8  17  286.02   25.29
   1   8  17  243.72   25.64
   1   8  18    2.24    3.66
   1   8  18    6.66    3.83
   1   8  19  408.76   27.83
   1   8  19  406.51   30.79
   1   8  20   43.31    8.90
   1   8  21  345.94   24.08
   1   9   0  586.33   53.38
   1   9   1   45.76   15.53
   1   9   2  643.15   57.13
   1   9   2  645.22   44.76
   1   9   3   65.16   18.00
   1   9   3   90.75   15.41
   1   9   4  646.79   57.87
   1   9   4  584.14   43.26
   1   9   4  689.37   42.29
   1   9   5    7.92    7.06
   1   9   5   -5.60    5.51
   1   9   5    4.63    4.27
   1   9   6  683.26   61.22
   1   9   6  774.91   49.22
   1   9   6  710.18   48.57
   1   9   6  805.55   48.02
   1   9   7  201.67   31.94
   1   9   7  150.86   20.70
   1   9   8  228.82   25.65
   1   9   9  100.14   16.52
   1   9  10  212.44   24.20
   1   9  10  170.34   22.01
   1   9  11  139.54   19.69
   1   9  11   89.56   15.95
   1   9  12  753.99   49.18
   1   9  12  805.96   51.41
   1   9  13  272.67   26.75
   1   9  13  281.67   28.23
   1   9  14  183.78   21.18
   1   9  14  187.51   21.98
   1   9  15  159.18   19.17
   1   9  16   52.32   10.78
   1   9  16   53.85   12.37
   1   9  17  478.36   31.88
   1   9  17  508.81   36.25
   1   9  18    9.03    5.12
   1   9  18    9.41    5.39
   1   9  19  350.86   21.63
   1   9  19  250.35   22.13
   1   9  20   23.22    5.83
   1  10  -1  291.95   27.28
   1  10   0  149.59   19.57
   1  10   1  111.57   16.76
   1  10   2  483.69   37.38
   1  10   3   93.24   15.79
   1  10   4  481.84   37.65
   1  10   5    9.68    4.28
   1  10   6  487.13   38.15
   1  10   7   48.41   11.73
   1  10   8  220.11   24.87
   1  10   9   46.99   10.84
   1  10   9   62.28   13.33
   1  10  10  441.78   35.42
   1  10  10  424.96   35.19
   1  10  11  114.45   16.81
   1  10  11   82.81   14.20
   1  10  12  190.79   21.36
   1  10  12  192.48   22.07
   1  10  13  100.17   15.24
   1  10  13  111.25   16.16
   1  10  14  287.02   24.74
   1  10  14  265.10   24.80
   1  10  15  246.79   21.81
   1  10  16   80.96   11.20
   1  10  16   90.94   13.44
   1  10  17  386.16   23.83
   1  10  17  320.11   25.32
   1  10  18   25.82    6.11
   1  10  19  264.30   18.56
   1  11  -7  301.69   20.05
   1  11  -6   -0.73    2.77
   1  11  -5  342.99   24.29
   1  11  -4   32.77    7.22
   1  11  -3  171.41   18.04
   1  11  -2   85.76   12.94
   1  11  -1  193.60   19.92
   1  11   0  148.46   17.67
   1  11   1  163.55   18.99
   1  11   2  171.63   19.60
   1  11   3  109.38   15.58
   1  11   4  291.95   26.31
   1  11   5   55.23   10.94
   1  11   6  436.51   33.22
   1  11   7   61.52   11.41
   1  11   8  645.35   41.20
   1  11   8  586.36   39.49
   1  11   9    9.97    5.75
   1  11   9    5.39    3.59
   1  11  10  493.64   33.81
   1  11  10  421.14   31.96
   1  11  11    3.52    3.92
   1  11  11    5.34    3.02
   1  11  12  273.39   22.99
   1  11  12  249.34   22.35
   1  11  13  105.71   13.02
   1  11  13   84.98   12.05
   1  11  14  165.44   15.63
   1  11  15   87.57   10.38
   1  11  15  111.63   13.22
   1  11  16  100.50   11.67
   1  11  17  193.31   15.12
   1  12  -3  161.48   13.43
   1  12  -2   39.98    7.04
   1  12  -1  125.28   12.98
   1  12   0   38.96    7.62
   1  12   1  149.54   14.94
   1  12   2  139.57   14.79
   1  12   3  126.12   14.19
   1  12   4  139.05   14.99
   1  12   5  111.08   13.20
   1  12   6  267.97   21.40
   1  12   7   73.65   10.86
   1  12   7   67.89   10.25
   1  12   8  344.19   24.37
   1  12   8  320.90   23.42
   1  12   9   23.74    5.80
   1  12   9   19.77    5.48
   1  12  10  359.02   23.65
   1  12  10  346.17   23.32
   1  12  11    5.25    2.86
   1  12  11    3.78    2.02
   1  12  12  232.12   16.56
   1  12  14  219.38   15.72
   2 -10   2  393.06   26.45
   2 -10   3  124.65   13.95
   2 -10   4  217.64   18.67
   2 -10   5  291.40   21.51
   2 -10   6  139.26   13.78
   2 -10   7  229.83   17.25
   2 -10   8    7.95    3.01
   2  -9   1   54.89   10.42
   2  -9   2  420.21   31.49
   2  -9   3  100.60   14.56
   2  -9   4  554.64   37.18
   2  -9   5  313.61   26.52
   2  -9   6  247.32   22.88
   2  -9   7  224.81   20.91
   2  -9   8   56.85    9.94
   2  -9   9  414.57   26.98
   2  -9  10   26.51    5.86
   2  -9  11  132.81   11.97
   2  -8   1   11.22    4.07
   2  -8   2  491.00   35.99
   2  -8   3   26.46    9.07
   2  -8   4  234.14   24.41
   2  -8   5   97.88   15.57
   2  -8   6  558.95   39.66
   2  -8   7  143.69   18.51
   2  -8   8  128.18   17.47
   2  -8   9  356.74   28.78
   2  -8  10   83.27   12.92
   2  -8  11  358.57   25.89
   2  -8  12   18.23    5.09
   2  -8  13  219.39   16.12
   2  -7   0  615.49   39.61
   2  -7   1   45.90   10.81
   2  -7   2 1127.13   59.70
   2  -7   3   63.33   12.38
   2  -7   4  352.27   30.86
   2  -7   5  157.33   20.35
   2  -7   6   73.63   14.34
   2  -7   7  321.07   30.05
   2  -7   8  411.38   34.63
   2  -7   9  673.10   45.27
   2  -7  10   57.14   12.24
   2  -7  11  238.85   20.90
   2  -7  11  201.86   21.80
   2  -7  12   46.26    8.47
   2  -7  12   46.71    9.44
   2  -7  13  312.81   21.80
   2  -7  13  331.26   24.73
   2  -7  14    5.23    2.35
   2  -7  14   10.86    3.50
   2  -7  15  159.34   12.88
   2  -6   2 1366.55   65.82
   2  -6   3   47.34   10.35
   2  -6   4  180.43   20.60
   2  -6   5    3.72    4.98
   2  -6   6 1079.83   60.33
   2  -6   7  369.24   32.61
   2  -6   8  666.31   42.03
   2  -6   8  713.23   47.62
   2  -6   9  733.51   45.29
   2  -6   9  790.02   50.71
   2  -6  10  512.59   36.88
   2  -6  10  568.69   41.91
   2  -6  11  507.23   36.62
   2  -6  11  550.38   40.13
   2  -6  12   67.48   12.57
   2  -6  12   61.63   12.25
   2  -6  13  286.67   25.07
   2  -6  13  306.02   26.84
   2  -6  14   68.20   11.27
   2  -6  14   81.88   12.32
   2  -6  14   64.00    9.88
   2  -6  15  227.37   19.27
   2  -6  15  220.29   19.01
   2  -6  16    8.88    3.64
   2  -5   5   11.24    5.07
   2  -5   6 1104.65   59.52
   2  -5   7    1.60    4.32
   2  -5   7    4.89    3.27
   2  -5   8 1111.79   59.11
   2  -5   8 1220.93   64.73
   2  -5   9  566.01   39.76
   2  -5   9  617.44   43.74
   2  -5  10  225.07   24.13
   2  -5  10  291.89   29.00
   2  -5  11  129.56   18.31
   2  -5  11  128.69   18.93
   2  -5  12  388.53   32.98
   2  -5  12  388.96   33.92
   2  -5  13  647.44   43.77
   2  -5  13  686.38   45.38
   2  -5  14  192.77   21.60
   2  -5  14  193.46   21.28
   2  -5  14  135.47   16.65
   2  -5  15  299.83   26.10
   2  -5  15  318.13   25.96
   2  -5  15  244.69   21.53
   2  -5  16   45.84    9.61
   2  -5  16   54.67    9.55
   2  -5  17  339.40   24.07
   2  -5  18    6.13    2.54
   2  -4   8  713.14   44.25
   2  -4   8  843.08   49.16
   2  -4   9  420.70   33.15
   2  -4   9  476.80   36.85
   2  -4  10  962.45   55.53
   2  -4  10 1034.20   58.81
   2  -4  11   96.34   16.61
   2  -4  11  107.87   17.76
   2  -4  12  382.43   33.57
   2  -4  12  374.22   33.42
   2  -4  13  396.57   34.56
   2  -4  13  430.17   35.78
   2  -4  14  353.51   32.00
   2  -4  14  389.82   32.89
   2  -4  15  639.15   42.51
   2  -4  15  607.37   40.02
   2  -4  16   50.62   11.09
   2  -4  16   50.14    9.99
   2  -4  16   32.16    7.71
   2  -4  17  284.88   24.85
   2  -4  18   30.85    7.03
   2  -4  19  302.02   21.05
   2  -3   5  132.77   10.59
   2  -3   6 3642.19  119.40
   2  -3   7    5.36    3.29
   2  -3   8 1017.87   45.51
   2  -3   9  211.25   17.99
   2  -3  10  932.27   45.88
   2  -3  10  903.58   52.04
   2  -3  10  861.68   51.30
   2  -3  11   17.02    7.76
   2  -3  11   17.54    6.55
   2  -3  12  537.27   40.36
   2  -3  12  568.86   41.16
   2  -3  13  223.77   25.50
   2  -3  13  241.29   25.98
   2  -3  14  236.33   25.99
   2  -3  14  191.55   22.76
   2  -3  15  103.65   17.19
   2  -3  15   97.72   13.79
   2  -3  15   76.71   13.75
   2  -3  15   87.13   14.95
   2  -3  16   80.23   14.81
   2  -3  16   52.83   11.08
   2  -3  16   97.55   13.38
   2  -3  16   53.10   10.74
   2  -3  17  569.85   39.36
   2  -3  17  517.28   33.91
   2  -3  18   81.69   13.44
   2  -3  19  174.51   17.61
   2  -3  20   41.59    7.58
   2  -2   4 3052.50   98.73
   2  -2   5  341.18   19.11
   2  -2   6 3778.37  124.06
   2  -2   7  124.11   12.08
   2  -2   8 1170.27   50.77
   2  -2   9   92.32   11.75
   2  -2  10 1337.24   59.90
   2  -2  11    8.42    4.06
   2  -2  11    2.17    2.43
   2  -2  11    6.63    3.31
   2  -2  11    0.36    4.06
   2  -2  12  151.16   19.98
   2  -2  12  149.34   17.59
   2  -2  12  157.42   21.15
   2  -2  12  161.47   19.63
   2  -2  13  113.26   16.36
   2  -2  13  134.34   19.18
   2  -2  13  133.94   18.17
   2  -2  14  634.87   41.72
   2  -2  14  669.34   46.27
   2  -2  14  517.31   38.93
   2  -2  14  625.53   42.30
   2  -2  15  114.63   18.34
   2  -2  15   91.95   15.42
   2  -2  15   77.83   13.66
   2  -2  16  120.74   18.65
   2  -2  16  129.65   17.22
   2  -2  16   99.06   14.76
   2  -2  16   92.60   14.84
   2  -2  17  411.54   34.37
   2  -2  17  394.43   30.25
   2  -2  17  309.02   27.35
   2  -2  18  177.67   21.13
   2  -2  18  203.01   19.64
   2  -2  18  135.82   15.96
   2  -2  19  275.87   24.76
   2  -2  19  267.86   21.35
   2  -2  20   63.18   10.36
   2  -2  20   70.23    9.27
   2  -2  21  325.19   21.65
   2  -1   4 1080.60   41.21
   2  -1   5  308.82   18.07
   2  -1   6 1845.80   67.57
   2  -1   7 1114.91   47.36
   2  -1   8 1028.38   46.44
   2  -1   9   41.85    7.87
   2  -1  10  604.37   35.55
   2  -1  11    6.91    4.27
   2  -1  12  421.37   33.74
   2  -1  12  452.57   32.52
   2  -1  12  439.09   34.28
   2  -1  12  417.57   30.58
   2  -1  13   66.27   13.44
   2  -1  13   73.16   12.83
   2  -1  13   76.20   14.31
   2  -1  13   79.93   13.25
   2  -1  13   69.90   12.31
   2  -1  14  723.93   48.06
   2  -1  14  736.17   46.03
   2  -1  14  708.93   48.60
   2  -1  14  742.77   46.07
   2  -1  15   19.56    7.67
   2  -1  15    6.01    3.82
   2  -1  15   13.39    6.99
   2  -1  15   18.35    6.21
   2  -1  15    9.06    5.06
   2  -1  16  176.40   22.76
   2  -1  16  153.63   22.12
   2  -1  16  144.23   18.98
   2  -1  17  384.11   33.85
   2  -1  17  373.60   31.34
   2  -1  17  282.47   27.22
   2  -1  18  248.42   26.10
   2  -1  18  257.95   24.58
   2  -1  18  183.32   20.37
   2  -1  19   97.22   15.36
   2  -1  19  130.69   16.27
   2  -1  20  254.92   23.27
   2  -1  20  253.30   21.55
   2  -1  21  463.73   29.20
   2  -1  21  483.65   27.99
   2   0   4  118.82    9.63
   2   0   5 2059.67   71.68
   2   0   6  711.16   32.83
   2   0   7  141.27   13.04
   2   0   8 1414.81   58.40
   2   0   9    6.04    3.28
   2   0   9   13.84    4.31
   2   0  10 1945.77   79.82
   2   0  10 2026.06   77.66
   2   0  11   11.84    4.79
   2   0  11    7.14    4.28
   2   0  12  330.61   27.42
   2   0  13   27.25    8.01
   2   0  13   20.06    7.42
   2   0  13   32.69    8.67
   2   0  13   24.80    7.84
   2   0  14 1109.89   62.90
   2   0  14 1237.39   64.24
   2   0  14 1172.51   64.43
   2   0  14 1203.02   61.73
   2   0  15   61.36   13.16
   2   0  15   61.30   12.90
   2   0  15   50.57   11.92
   2   0  15   54.80   11.89
   2   0  16  152.00   20.71
   2   0  16  134.21   20.49
   2   0  16  135.81   18.63
   2   0  17   98.67   16.40
   2   0  17   89.73   16.81
   2   0  17   99.64   16.43
   2   0  17   64.94   12.27
   2   0  18  692.51   45.62
   2   0  18  620.57   46.58
   2   0  18  691.63   45.29
   2   0  19  119.90   17.14
   2   0  19  109.44   17.97
   2   0  19  119.91   17.05
   2   0  19   85.02   13.54
   2   0  20  310.38   26.35
   2   0  20  315.53   26.41
   2   0  20  271.18   22.45
   2   0  21  554.95   33.43
   2   0  21  550.06   33.95
   2   0  22   61.19    8.73
   2   1  -3  731.44   28.75
   2   1  -2  655.12   26.87
   2   1  -1 3558.92  112.61
   2   1   0  632.64   27.32
   2   1   1  755.11   31.63
   2   1   2  207.33   13.79
   2   1   3 1445.40   53.54
   2   1   4  204.16   14.40
   2   1   5  138.97   11.77
   2   1   5  137.08   11.01
   2   1   6  234.48   16.14
   2   1   6  231.87   15.87
   2   1   7 1217.62   47.69
   2   1   7 1098.94   47.48
   2   1   8 1427.94   58.14
   2   1   9  331.65   23.19
   2   1  10 1268.15   57.22
   2   1  11   36.39    8.18
   2   1  12 1103.32   56.13
   2   1  13   45.41    9.27
   2   1  13   50.54   10.62
   2   1  13   49.56   10.56
   2   1  13   40.02    9.07
   2   1  13   39.53    8.43
   2   1  14  932.13   53.39
   2   1  14  913.49   53.61
   2   1  14 1053.17   57.35
   2   1  14  994.81   55.73
   2   1  14 1005.46   53.74
   2   1  15   82.43   14.67
   2   1  15  116.42   17.75
   2   1  15  109.08   17.04
   2   1  15  101.42   15.43
   2   1  16  697.41   47.22
   2   1  16  721.50   44.84
   2   1  17  160.50   20.52
   2   1  17  216.69   25.50
   2   1  17  218.04   24.76
   2   1  17  154.45   19.57
   2   1  18  877.45   55.37
   2   1  18  941.38   55.12
   2   1  18  812.21   48.45
   2   1  19   80.92   13.64
   2   1  19   95.46   17.16
   2   1  19   91.83   14.50
   2   1  19   96.05   16.06
   2   1  20  368.64   28.70
   2   1  20  470.81   36.48
   2   1  20  470.30   34.34
   2   1  20  301.28   25.73
   2   1  21  535.07   34.55
   2   1  21  416.43   27.70
   2   1  22   76.25   11.00
   2   1  23  202.35   15.89
   2   2  -5  633.59   25.20
   2   2  -4  252.53   14.03
   2   2  -3 1067.29   40.33
   2   2  -2   31.18    4.97
   2   2  -1 1513.41   55.35
   2   2   0   87.30    8.85
   2   2   0   88.00    4.42
   2   2   1 1894.37   67.26
   2   2   1 1850.53   57.64
   2   2   2 1159.99   46.63
   2   2   3  956.77   40.95
   2   2   4  516.90   27.25
   2   2   5  875.69   39.39
   2   2   6   21.79    4.85
   2   2   6   17.21    4.13
   2   2   7 1989.22   74.04
   2   2   7 1971.74   71.88
   2   2   8  543.57   29.16
   2   2   8  517.00   28.54
   2   2   9  344.90   22.68
   2   2   9  416.68   25.58
   2   2  10 2022.08   74.11
   2   2  10 1819.66   75.90
   2   2  11  104.92   13.55
   2   2  12  222.19   21.26
   2   2  13    1.55    2.07
   2   2  13    4.49    2.41
   2   2  13    6.40    4.16
   2   2  13    0.93    2.46
   2   2  14 3240.24  125.37
   2   2  14 3090.08  129.87
   2   2  14 3298.52  127.95
   2   2  14 3298.30  127.16
   2   2  14 3403.82  125.24
   2   2  15    3.00    4.53
   2   2  15   -1.41    4.24
   2   2  15    1.62    5.26
   2   2  15    2.38    4.09
   2   2  15   12.69    6.79
   2   2  16  741.37   48.17
   2   2  16  784.30   50.83
   2   2  16  759.34   49.44
   2   2  16  782.72   47.66
   2   2  17    2.55    2.55
   2   2  17    4.15    4.28
   2   2  17    4.51    2.38
   2   2  18  644.67   46.39
   2   2  18  668.36   46.78
   2   2  18  687.94   44.05
   2   2  19  324.33   30.75
   2   2  19  298.28   30.09
   2   2  19  316.00   27.69
   2   2  20  240.23   25.21
   2   2  20  235.40   25.71
   2   2  20  226.28   21.76
   2   2  21  123.16   17.30
   2   2  21  109.36   15.38
   2   2  22  215.14   19.88
   2   2  22  170.45   18.98
   2   2  23  122.16   12.97
   2   3  -5  903.07   36.58
   2   3  -4  626.25   29.34
   2   3  -3  721.87   33.46
   2   3  -2  341.16   21.16
   2   3  -1 2248.69   81.56
   2   3   2   44.50    4.72
   2   3   3 3084.45   97.70
   2   3   4  321.16   22.51
   2   3   4  320.30   16.84
   2   3   5 2919.51  105.65
   2   3   5 2973.87   97.01
   2   3   6 1266.63   55.36
   2   3   7 4442.11  148.22
   2   3   7 4285.30  140.90
   2   3   8  295.21   22.19
   2   3   8  288.29   19.64
   2   3   9  218.91   18.79
   2   3   9  216.15   17.55
   2   3  10 1181.04   56.60
   2   3  10 1545.69   60.40
   2   3  11  524.12   32.40
   2   3  12  413.68   29.52
   2   3  13   71.27   11.68
   2   3  13   77.47   14.95
   2   3  13   69.52   11.84
   2   3  13   67.09   11.76
   2   3  13   51.47    9.61
   2   3  14 1149.01   59.09
   2   3  14 1150.11   66.35
   2   3  14 1157.97   59.89
   2   3  14 1193.10   60.66
   2   3  14 1083.76   56.90
   2   3  15  242.33   24.41
   2   3  15  237.17   27.73
   2   3  15  245.99   25.11
   2   3  15  228.25   24.13
   2   3  15  207.64   22.89
   2   3  15  224.84   23.09
   2   3  16 1191.40   63.23
   2   3  16 1233.70   65.28
   2   3  16 1251.83   65.52
   2   3  16 1205.55   63.85
   2   3  16 1234.21   62.34
   2   3  17   11.13    8.66
   2   3  17    6.34    3.19
   2   3  17   12.02    6.66
   2   3  17   -0.84    3.14
   2   3  17    3.77    3.44
   2   3  18  155.66   21.52
   2   3  18  198.43   23.21
   2   3  18  185.17   23.00
   2   3  18  188.96   21.81
   2   3  19    2.81    4.90
   2   3  19   -1.59    6.12
   2   3  19    1.46    3.69
   2   3  20  240.44   24.73
   2   3  20  259.26   26.56
   2   3  21  102.29   15.95
   2   3  21   99.25   14.77
   2   3  22  214.49   19.72
   2   3  22  168.28   19.03
   2   3  23   24.43    5.81
   2   4  -4  216.35   17.91
   2   4  -1  340.21   25.44
   2   4   0  343.19   25.90
   2   4   1 3612.09  130.15
   2   4   2  223.91   20.91
   2   4   3 2234.57   86.88
   2   4   3 2029.86   70.70
   2   4   4   29.69    5.09
   2   4   5 2527.77   86.40
   2   4   6  122.40   11.39
   2   4   7 4237.61  140.22
   2   4   7 4314.66  151.38
   2   4   8  469.68   27.06
   2   4   8  458.21   31.86
   2   4   9  343.73   26.94
   2   4  10  387.10   29.81
   2   4  10  547.02   30.46
   2   4  11  697.87   40.53
   2   4  11  666.74   37.54
   2   4  12  241.75   21.36
   2   4  13  182.60   23.58
   2   4  13  199.59   20.74
   2   4  13  213.58   20.92
   2   4  13  206.13   21.32
   2   4  13  190.16   19.77
   2   4  13  203.46   20.48
   2   4  14 1053.31   56.64
   2   4  14 1082.63   65.50
   2   4  14 1093.81   56.49
   2   4  14 1070.19   57.51
   2   4  14 1032.71   55.83
   2   4  14 1049.94   55.47
   2   4  15  119.35   17.23
   2   4  15  103.40   18.88
   2   4  15  121.49   16.82
   2   4  15  101.87   16.03
   2   4  15  117.44   16.56
   2   4  15  103.57   15.74
   2   4  16  154.18   23.27
   2   4  16  124.45   17.79
   2   4  16  129.29   17.83
   2   4  16  118.08   17.64
   2   4  16  125.44   17.43
   2   4  17   54.08   14.35
   2   4  17   48.68   11.37
   2   4  17   50.89   11.32
   2   4  17   44.33   10.47
   2   4  17   32.81    9.03
   2   4  18  346.18   30.97
   2   4  18  342.35   30.22
   2   4  18  339.48   31.36
   2   4  18  281.97   31.64
   2   4  18  340.92   29.70
   2   4  19    8.18    6.85
   2   4  19    3.44    3.59
   2   4  20  257.64   26.21
   2   4  20  256.01   24.50
   2   4  21    3.51    3.22
   2   4  21    5.09    3.61
   2   4  22  294.31   25.49
   2   4  22  367.34   25.56
   2   4  23   55.30    9.57
   2   5  -2  197.90   21.34
   2   5  -1 1390.57   68.12
   2   5   0   40.11   10.28
   2   5   1 1478.61   71.85
   2   5   2  923.32   53.42
   2   5   3 1451.67   71.69
   2   5   4    3.21    3.93
   2   5   4   17.03    4.24
   2   5   5 1461.36   73.30
   2   5   5 1499.68   58.67
   2   5   6   64.62    8.98
   2   5   7  841.76   40.54
   2   5   8    3.77    3.15
   2   5   9  243.66   20.39
   2   5   9  244.09   24.84
   2   5  10  477.17   36.05
   2   5  11  640.57   42.70
   2   5  12  157.62   18.97
   2   5  12  194.04   23.42
   2   5  12  171.53   19.25
   2   5  12  195.45   19.37
   2   5  12  169.61   18.63
   2   5  13  253.46   28.18
   2   5  13  200.17   21.55
   2   5  13  227.24   21.50
   2   5  13  213.98   21.92
   2   5  14  542.65   38.14
   2   5  14  492.88   34.58
   2   5  14  553.23   38.88
   2   5  14  485.07   42.07
   2   5  14  513.51   36.37
   2   5  15  439.81   34.02
   2   5  15  343.19   28.85
   2   5  15  405.07   33.39
   2   5  15  410.52   39.44
   2   5  15  363.53   30.78
   2   5  16  639.48   43.68
   2   5  16  654.04   44.71
   2   5  16  631.28   40.85
   2   5  16  640.95   51.03
   2   5  17   35.07    9.98
   2   5  17   45.56   12.28
   2   5  17   26.03    8.66
   2   5  17   19.62    6.33
   2   5  18  691.42   45.37
   2   5  18  659.60   41.65
   2   5  18  689.87   46.25
   2   5  18  613.13   49.69
   2   5  19   15.12    6.30
   2   5  19   17.74    7.19
   2   5  19   18.73    6.19
   2   5  20  394.05   28.91
   2   5  20  398.66   32.44
   2   5  21   21.58    7.22
   2   5  21   22.67    5.80
   2   5  22  338.08   26.62
   2   5  23    9.29    3.98
   2   6  -2 1062.26   61.58
   2   6  -1  152.98   20.77
   2   6   0  902.80   57.08
   2   6   1 1679.58   84.94
   2   6   2  178.96   23.75
   2   6   3  674.33   48.93
   2   6   4  222.97   26.74
   2   6   5  968.90   61.82
   2   6   5 1044.10   47.85
   2   6   6   35.44   10.56
   2   6   6   40.23    7.95
   2   6   7 1159.98   53.61
   2   6   8    1.75    2.97
   2   6   9  662.37   39.15
   2   6  10  297.18   25.19
   2   6  10  245.39   28.52
   2   6  10  295.29   28.10
   2   6  10  345.14   27.74
   2   6  10  270.69   25.71
   2   6  11  648.55   40.80
   2   6  11  602.85   43.65
   2   6  11  706.74   42.71
   2   6  12   62.11   13.45
   2   6  12   99.17   14.87
   2   6  12  108.01   15.92
   2   6  12  103.28   17.35
   2   6  12  100.70   14.35
   2   6  13  269.84   26.70
   2   6  13  317.25   32.52
   2   6  14  456.40   35.47
   2   6  14  437.70   39.96
   2   6  15  371.70   32.34
   2   6  15  394.40   29.48
   2   6  15  413.59   34.67
   2   6  15  376.52   37.98
   2   6  16  349.46   30.96
   2   6  16  317.05   26.43
   2   6  16  401.47   33.78
   2   6  16  337.98   36.38
   2   6  17  174.32   21.40
   2   6  17  147.70   23.49
   2   6  17  159.71   21.01
   2   6  17  149.90   17.15
   2   6  18  570.95   40.01
   2   6  18  566.37   40.87
   2   6  18  512.11   33.82
   2   6  18  567.38   46.60
   2   6  19   72.86   12.72
   2   6  19   64.94   12.89
   2   6  19   58.49    9.96
   2   6  20  325.63   27.10
   2   6  20  337.58   28.65
   2   6  21   -1.52    4.64
   2   6  22  532.65   33.06
   2   6  23   30.88    6.57
   2   7  -6  868.99   47.40
   2   7  -5   12.11    6.05
   2   7  -4 1394.39   64.48
   2   7  -3   69.74   11.58
   2   7  -2 1174.63   57.13
   2   7  -1  930.80   61.71
   2   7   0  404.27   39.03
   2   7   1  183.60   25.91
   2   7   2  759.38   56.41
   2   7   3 1258.22   76.64
   2   7   4   52.77   13.95
   2   7   5  678.41   53.98
   2   7   5  739.85   40.96
   2   7   6   84.31   17.91
   2   7   6   66.24   11.12
   2   7   7 1094.08   55.72
   2   7   7 1180.85   60.12
   2   7   8    0.59    2.85
   2   7   8   -3.39    5.24
   2   7   9  583.05   38.72
   2   7   9  553.25   40.78
   2   7   9  589.39   40.70
   2   7  10   65.04   11.98
   2   7  10   63.63   15.42
   2   7  10   85.04   16.06
   2   7  10  107.01   16.61
   2   7  10   86.83   15.29
   2   7  10   92.44   14.65
   2   7  11  947.12   66.43
   2   7  11 1139.56   60.11
   2   7  11 1105.80   60.64
   2   7  11 1102.45   57.55
   2   7  11 1149.19   58.95
   2   7  11 1036.13   62.55
   2   7  12   98.20   19.29
   2   7  12  105.11   16.33
   2   7  12  109.66   18.27
   2   7  12  116.95   16.21
   2   7  12   78.83   13.67
   2   7  13  324.32   29.99
   2   7  13  360.36   34.85
   2   7  13  251.17   25.51
   2   7  14   79.46   14.29
   2   7  14   64.97   14.19
   2   7  15  374.86   32.60
   2   7  15  361.16   32.97
   2   7  15  358.99   37.56
   2   7  16  320.27   29.63
   2   7  16  325.77   30.78
   2   7  16  308.34   34.32
   2   7  17  149.83   24.19
   2   7  17  116.16   16.98
   2   7  17  109.58   17.15
   2   7  18  369.49   30.48
   2   7  18  336.80   30.18
   2   7  19  218.13   22.06
   2   7  19  246.92   24.43
   2   7  20  342.55   26.64
   2   7  20  360.34   28.53
   2   7  21   12.69    5.67
   2   7  22  584.54   32.95
   2   8  -3  213.69   21.51
   2   8  -2  631.87   39.84
   2   8  -1   63.08   12.22
   2   8   0  908.13   64.78
   2   8   0  882.11   49.19
   2   8   1  460.66   44.86
   2   8   1  378.39   30.14
   2   8   2  454.21   44.69
   2   8   2  406.96   31.40
   2   8   3  310.75   37.05
   2   8   3  322.69   28.65
   2   8   3  295.04   26.33
   2   8   4  886.52   66.72
   2   8   4  890.69   52.17
   2   8   4  907.09   51.17
   2   8   5  291.18   36.41
   2   8   5  248.65   23.59
   2   8   5  269.61   26.12
   2   8   5  257.03   25.07
   2   8   6   22.98   11.92
   2   8   6   29.56    8.10
   2   8   6   38.59   10.10
   2   8   6   52.01   11.17
   2   8   7  420.72   33.34
   2   8   7  500.65   36.87
   2   8   7  523.12   37.87
   2   8   8   19.16    7.20
   2   8   8   21.85    8.92
   2   8   8   21.28    8.16
   2   8   8   14.46    7.95
   2   8   9 1413.36   69.12
   2   8   9 1409.65   70.69
   2   8   9 1433.54   71.88
   2   8  10   20.99    7.36
   2   8  10   13.74    9.67
   2   8  10   16.06    7.34
   2   8  10   20.51    9.23
   2   8  10   13.16    6.09
   2   8  11  544.53   50.71
   2   8  11  681.42   45.43
   2   8  11  659.34   45.36
   2   8  11  490.13   38.52
   2   8  11  634.89   46.01
   2   8  12   11.59    6.35
   2   8  12    3.81    3.24
   2   8  12   14.42    7.04
   2   8  13  728.34   47.42
   2   8  13  642.18   48.39
   2   8  14  154.73   22.88
   2   8  14  176.33   21.66
   2   8  15  245.47   25.64
   2   8  15  261.79   30.21
   2   8  16   66.84   12.54
   2   8  16   80.43   15.31
   2   8  17  144.77   18.43
   2   8  17  136.57   18.70
   2   8  18  338.89   27.88
   2   8  18  359.16   30.11
   2   8  19  132.76   15.77
   2   8  19  153.61   18.10
   2   8  20  257.31   21.02
   2   8  20  297.68   23.94
   2   8  21   32.64    7.10
   2   9  -1  137.09   16.70
   2   9   0  759.12   44.70
   2   9   1   70.99   13.44
   2   9   1   91.18   14.47
   2   9   2  331.94   30.54
   2   9   2  479.13   33.88
   2   9   3  231.05   25.18
   2   9   3  313.84   27.17
   2   9   4  104.88   16.57
   2   9   4  168.40   20.00
   2   9   5   85.77   15.36
   2   9   5  173.97   20.51
   2   9   6  114.42   16.54
   2   9   6   71.67   14.05
   2   9   6  111.51   16.44
   2   9   7  162.99   20.05
   2   9   7  152.07   20.54
   2   9   7  153.31   20.09
   2   9   8   -0.69    5.22
   2   9   8    2.57    4.26
   2   9   9  197.51   23.12
   2   9   9  242.76   25.86
   2   9  10    4.83    4.10
   2   9  10   -0.11    5.53
   2   9  11 1441.06   72.31
   2   9  11 1079.82   62.14
   2   9  12    2.74    4.64
   2   9  12    0.77    4.71
   2   9  13  465.36   37.50
   2   9  13  447.75   34.97
   2   9  14   33.87    9.02
   2   9  15  576.90   40.40
   2   9  16  148.68   18.52
   2   9  16  154.66   19.84
   2   9  17  189.63   20.18
   2   9  17  166.95   19.74
   2   9  18  189.58   18.59
   2   9  18  177.50   18.92
   2   9  19  135.67   14.25
   2   9  19  117.82   14.25
   2   9  20  188.34   15.12
   2   9  20  181.54   16.22
   2  10  -1    2.79    2.61
   2  10   0  191.91   21.37
   2  10   1  106.30   15.92
   2  10   1  183.40   19.08
   2  10   2  325.50   29.61
   2  10   2  473.11   32.61
   2  10   3  133.93   18.47
   2  10   3  195.47   20.42
   2  10   4  383.63   32.81
   2  10   4  500.64   34.83
   2  10   5  216.07   23.71
   2  10   5  305.65   26.68
   2  10   6   33.10    8.71
   2  10   6   34.96    9.05
   2  10   7  388.17   33.15
   2  10   7  512.63   36.69
   2  10   8  113.00   16.85
   2  10   9  515.34   40.12
   2  10   9  478.84   36.45
   2  10  10   55.39   12.62
   2  10  10   50.25   11.06
   2  10  11  595.23   42.84
   2  10  11  580.45   39.66
   2  10  12   38.45   10.71
   2  10  12   51.39   10.90
   2  10  13  713.19   45.76
   2  10  13  691.52   42.15
   2  10  14   -2.58    3.39
   2  10  15  355.32   28.27
   2  10  15  351.17   29.11
   2  10  16    9.41    4.84
   2  10  16    1.51    2.37
   2  10  17  362.75   25.44
   2  10  17  357.26   26.32
   2  10  18   89.49   10.72
   2  10  18   87.75   11.34
   2  10  19  135.56   12.71
   2  11  -7  156.69   12.98
   2  11  -6  238.61   18.04
   2  11  -5   54.88    8.89
   2  11  -4  234.50   19.74
   2  11  -3   39.05    8.13
   2  11  -2  340.58   25.54
   2  11  -1   -2.58    3.45
   2  11   0  196.69   19.84
   2  11   1    4.54    3.28
   2  11   2  217.64   21.23
   2  11   3   35.92    7.99
   2  11   4  198.30   21.29
   2  11   4  344.83   25.41
   2  11   5  124.66   16.28
   2  11   6  186.04   19.89
   2  11   7  223.97   22.13
   2  11   8  342.32   29.98
   2  11   8  352.42   28.05
   2  11   9  235.83   24.28
   2  11   9  248.68   22.83
   2  11  10  242.77   24.45
   2  11  10  260.61   22.88
   2  11  11  590.25   38.90
   2  11  11  555.53   34.77
   2  11  12   21.83    6.60
   2  11  13  257.45   22.75
   2  11  14   -8.53    4.05
   2  11  15  325.19   23.30
   2  11  15  346.55   24.34
   2  11  16   -0.81    2.34
   2  11  16    0.44    1.73
   2  12  -2  156.48   13.11
   2  12  -1  115.62   11.72
   2  12   0  325.56   21.57
   2  12   1    9.04    3.81
   2  12   2  315.96   21.93
   2  12   3   -3.50    3.08
   2  12   4  362.64   24.19
   2  12   5   61.34    9.11
   2  12   6  241.90   19.21
   2  12   7  107.41   13.83
   2  12   7   87.65   10.60
   2  12   8  332.68   25.29
   2  12   9  259.25   21.69
   2  12  10   76.83   11.01
   2  12  11  330.17   23.48
   2  12  12   18.48    5.59
   2  12  13  297.81   19.47
   2  12  13  225.40   17.03
   2  12  14   30.62    5.52
   2  13   3    4.39    2.08
   2  13   4  170.99   13.84
   2  13   5    5.92    2.60
   2  13   6  297.81   19.09
   2  13   7   37.88    6.26
   2  13   8  192.60   14.24
   2  13   9   48.09    6.45
   3  -9   3  609.31   35.69
   3  -9   4    0.07    2.22
   3  -9   5  300.30   23.24
   3  -9   6   26.06    6.28
   3  -9   7  326.36   22.84
   3  -9   8   29.69    6.05
   3  -9   9  127.32   11.95
   3  -8   2   12.16    5.32
   3  -8   3  468.93   33.84
   3  -8   4    3.18    3.43
   3  -8   5  756.99   45.06
   3  -8   6   59.69   12.05
   3  -8   7  215.70   21.32
   3  -8   8    9.59    2.75
   3  -8   9  342.33   25.86
   3  -8  10   29.61    6.70
   3  -8  11  359.84   23.47
   3  -8  12   90.30    9.80
   3  -7   2  327.99   28.32
   3  -7   3  542.66   38.22
   3  -7   4   21.17    8.25
   3  -7   5  639.23   43.14
   3  -7   6  120.20   17.30
   3  -7   7  866.07   51.67
   3  -7   8   -0.23    4.07
   3  -7   9  520.50   37.10
   3  -7  10   36.74    8.97
   3  -7  11  617.76   38.01
   3  -7  12  141.42   15.43
   3  -7  13  102.69   11.93
   3  -7  13  104.68   11.06
   3  -6   1  350.91   28.40
   3  -6   2  141.07   18.08
   3  -6   3  331.21   29.06
   3  -6   4  220.25   23.66
   3  -6   5  168.77   20.76
   3  -6   6    7.50    4.69
   3  -6   7  267.23   27.18
   3  -6   8  344.36   28.08
   3  -6   8  380.24   33.08
   3  -6   9 1131.27   57.90
   3  -6   9 1126.89   62.80
   3  -6  10    1.93    2.92
   3  -6  10   10.27    5.59
   3  -6  11  613.54   38.85
   3  -6  11  627.08   42.11
   3  -6  12   78.77   11.93
   3  -6  12   85.06   13.81
   3  -6  13  226.02   20.35
   3  -6  13  253.20   22.62
   3  -6  14  133.21   14.16
   3  -6  14  115.83   13.82
   3  -6  14  113.47   12.90
   3  -6  15  268.04   18.29
   3  -6  15  192.82   14.97
   3  -5   3  406.63   31.27
   3  -5   4  532.82   37.70
   3  -5   5  141.84   18.61
   3  -5   6  430.79   31.90
   3  -5   6  449.89   35.51
   3  -5   7  603.31   40.26
   3  -5   7  664.53   44.94
   3  -5   8  144.68   18.49
   3  -5   8  170.75   22.24
   3  -5   9  413.98   33.43
   3  -5   9  475.68   37.59
   3  -5  10    2.26    3.09
   3  -5  10   -0.04    4.89
   3  -5  11  585.98   41.12
   3  -5  11  643.96   44.83
   3  -5  12  141.82   18.59
   3  -5  12  136.94   19.07
   3  -5  13  410.18   32.29
   3  -5  13  393.86   32.30
   3  -5  14   71.54   12.05
   3  -5  14   61.14   11.22
   3  -5  14   48.03   10.01
   3  -5  15  262.40   22.74
   3  -5  15  245.08   21.85
   3  -5  15  255.96   21.30
   3  -5  16  156.13   15.64
   3  -5  16  121.12   12.45
   3  -5  17   65.77    8.72
   3  -4   6  158.18   18.56
   3  -4   6  152.65   19.06
   3  -4   7  728.08   44.62
   3  -4   7  769.31   47.63
   3  -4   8  295.33   27.11
   3  -4   8  294.65   28.25
   3  -4   9  962.98   55.34
   3  -4   9  997.28   58.17
   3  -4  10    0.07    4.00
   3  -4  10   10.13    4.32
   3  -4  11  585.32   42.62
   3  -4  11  617.69   44.33
   3  -4  12    4.20    5.10
   3  -4  12   14.80    6.96
   3  -4  13  363.16   32.45
   3  -4  13  391.47   33.64
   3  -4  14  202.78   22.98
   3  -4  14  200.31   22.86
   3  -4  15  361.48   30.24
   3  -4  15  372.18   30.20
   3  -4  15  377.05   29.77
   3  -4  16   24.64    7.29
   3  -4  16   18.71    6.15
   3  -4  17  125.29   15.05
   3  -4  17  146.24   14.47
   3  -4  18  151.08   14.66
   3  -4  19  144.59   12.21
   3  -3   8  215.81   22.67
   3  -3   8  224.77   22.93
   3  -3   9  520.55   37.61
   3  -3   9  475.64   36.11
   3  -3  10   80.87   14.40
   3  -3  10   63.28   13.07
   3  -3  11 1148.48   63.04
   3  -3  11 1105.94   62.52
   3  -3  12   14.82    6.79
   3  -3  12   20.91    7.33
   3  -3  13  512.08   39.76
   3  -3  13  456.22   37.51
   3  -3  14  133.90   19.62
   3  -3  14  141.06   19.66
   3  -3  15  508.28   39.21
   3  -3  15  527.06   38.34
   3  -3  15  521.25   38.39
   3  -3  16   59.55   12.39
   3  -3  16   50.81   10.98
   3  -3  17  291.43   25.95
   3  -3  17  267.68   23.26
   3  -3  18   93.67   13.04
   3  -3  18   72.27   10.20
   3  -3  19  177.07   16.27
   3  -3  19  140.42   12.18
   3  -3  20   72.36    8.68
   3  -2  10  201.64   22.69
   3  -2  10  169.55   19.70
   3  -2  11 1099.64   60.94
   3  -2  11 1066.31   58.78
   3  -2  12  333.18   30.76
   3  -2  12  302.87   25.77
   3  -2  12  279.31   27.44
   3  -2  13  708.68   48.23
   3  -2  13  664.67   41.33
   3  -2  13  652.61   44.78
   3  -2  14    6.48    4.20
   3  -2  14   17.85    7.13
   3  -2  14    9.40    5.95
   3  -2  14    3.55    3.92
   3  -2  15  938.73   57.31
   3  -2  15  985.26   51.65
   3  -2  15  778.95   50.75
   3  -2  15  967.46   56.49
   3  -2  16    0.90    3.09
   3  -2  16    6.91    4.58
   3  -2  16    3.65    3.94
   3  -2  17  417.46   33.96
   3  -2  17  454.14   30.25
   3  -2  17  382.48   31.34
   3  -2  18   58.32    9.89
   3  -2  18   50.80    9.97
   3  -2  19  229.10   21.09
   3  -2  19  186.71   17.02
   3  -2  20   19.90    5.57
   3  -2  20    8.39    3.05
   3  -1   9  194.09   18.21
   3  -1  10  249.11   21.82
   3  -1  11  955.17   55.88
   3  -1  11 1109.29   54.20
   3  -1  11  985.70   52.42
   3  -1  11  963.06   56.12
   3  -1  11 1067.15   54.80
   3  -1  12  445.49   35.74
   3  -1  12  441.29   32.49
   3  -1  12  433.52   35.69
   3  -1  12  427.70   32.29
   3  -1  12  430.78   33.23
   3  -1  13  428.27   36.05
   3  -1  13  498.38   35.69
   3  -1  13  419.72   32.96
   3  -1  13  422.07   36.76
   3  -1  13  452.58   34.21
   3  -1  14    1.96    3.30
   3  -1  14    2.28    4.33
   3  -1  14   10.23    5.43
   3  -1  14   -3.01    5.49
   3  -1  14    5.97    5.40
   3  -1  15  761.67   51.39
   3  -1  15  758.90   46.98
   3  -1  15  769.91   49.87
   3  -1  16  117.89   18.40
   3  -1  16  106.58   16.11
   3  -1  16  100.83   16.17
   3  -1  17  302.54   29.45
   3  -1  17  299.15   26.64
   3  -1  17  286.86   27.55
   3  -1  18   -0.92    3.90
   3  -1  18    0.19    3.68
   3  -1  18    1.67    4.85
   3  -1  19  578.70   37.95
   3  -1  19  580.38   34.55
   3  -1  19  520.55   34.00
   3  -1  20    2.74    3.07
   3  -1  20    6.13    3.40
   3  -1  20    0.26    1.95
   3  -1  21  283.93   20.15
   3   0   8  914.53   44.42
   3   0   9  464.24   30.05
   3   0  10  580.78   35.86
   3   0  11  553.72   36.27
   3   0  12  789.84   49.21
   3   0  12  851.43   48.70
   3   0  12  874.51   51.19
   3   0  12  872.45   46.98
   3   0  12  797.75   47.84
   3   0  12  849.13   48.55
   3   0  13  427.29   35.03
   3   0  13  474.62   35.30
   3   0  13  438.81   36.02
   3   0  13  394.00   32.85
   3   0  13  475.69   33.37
   3   0  13  481.15   35.47
   3   0  14    9.02    5.90
   3   0  14   20.11    7.92
   3   0  14   17.62    7.89
   3   0  14   13.69    5.41
   3   0  14   25.55    8.16
   3   0  15  567.58   42.34
   3   0  15  543.81   40.24
   3   0  15  592.46   44.75
   3   0  15  567.37   41.22
   3   0  16  271.95   28.33
   3   0  16  283.42   27.89
   3   0  16  284.12   30.25
   3   0  16  264.98   27.08
   3   0  17  472.92   37.59
   3   0  17  440.01   35.01
   3   0  17  421.42   38.13
   3   0  17  398.77   33.74
   3   0  18    5.99    4.89
   3   0  18    4.88    2.96
   3   0  18    5.73    4.31
   3   0  19  761.39   46.09
   3   0  19  789.05   45.22
   3   0  19  684.77   42.47
   3   0  20   18.86    5.74
   3   0  20   24.64    7.03
   3   0  20   14.09    4.88
   3   0  21  406.12   26.02
   3   0  21  425.05   26.36
   3   0  21  336.30   22.78
   3   1   0 2407.67   85.38
   3   1   1  630.69   31.76
   3   1   2 1080.66   46.72
   3   1   3  354.24   22.90
   3   1   4  580.22   31.70
   3   1   9   21.05    6.10
   3   1  10 2015.72   82.81
   3   1  11 1446.11   67.12
   3   1  12  537.44   36.14
   3   1  12  573.78   38.65
   3   1  12  629.37   40.05
   3   1  12  562.21   38.38
   3   1  12  576.21   38.61
   3   1  12  618.80   38.64
   3   1  13  172.11   20.02
   3   1  13  212.32   22.93
   3   1  13  187.69   21.19
   3   1  13  194.28   22.08
   3   1  13  210.64   22.80
   3   1  13  204.48   21.43
   3   1  14   65.57   13.39
   3   1  14   83.12   14.64
   3   1  14   77.57   14.55
   3   1  14   72.76   13.71
   3   1  14   71.52   13.46
   3   1  15  608.14   42.66
   3   1  15  658.28   45.18
   3   1  15  610.95   44.30
   3   1  15  554.35   41.81
   3   1  15  640.41   43.01
   3   1  16   19.68    7.26
   3   1  16   39.39   10.92
   3   1  16   49.75   11.79
   3   1  16   38.38   10.08
   3   1  17  326.52   30.18
   3   1  17  363.60   32.45
   3   1  17  333.62   32.55
   3   1  17  368.09   31.52
   3   1  18  -10.39    5.46
   3   1  18    4.70    3.92
   3   1  18   -4.39    5.42
   3   1  18    0.50    4.04
   3   1  19  676.81   46.31
   3   1  19  711.23   44.39
   3   1  19  635.97   40.79
   3   1  20   40.42    8.71
   3   1  20   44.64    9.74
   3   1  20   51.99    9.85
   3   1  21  324.97   24.79
   3   1  21  271.16   21.40
   3   2  -3 1696.77   62.92
   3   2  -2 1205.49   49.02
   3   2  -1  414.59   23.98
   3   2   0 1147.58   48.60
   3   2   1  212.50   17.06
   3   2   2 1343.27   56.07
   3   2   3   59.50    9.18
   3   2   4 1459.88   61.10
   3   2   5    9.46    4.89
   3   2   6 1911.53   76.29
   3   2   7   -0.38    2.48
   3   2   8 3002.32  110.20
   3   2   9   22.12    6.37
   3   2  11  625.43   38.53
   3   2  12 1244.07   61.19
   3   2  12 1425.29   65.97
   3   2  12 1277.17   64.03
   3   2  12 1336.40   62.17
   3   2  13 1014.42   53.19
   3   2  13  920.98   52.21
   3   2  13 1008.84   57.59
   3   2  13 1084.30   56.95
   3   2  13 1008.58   55.72
   3   2  13  972.46   54.11
   3   2  13 1003.12   53.26
   3   2  14  475.40   34.71
   3   2  14  492.30   36.05
   3   2  14  489.08   38.49
   3   2  14  545.51   39.32
   3   2  14  500.21   37.11
   3   2  14  498.17   37.67
   3   2  14  491.74   35.54
   3   2  15  137.89   18.05
   3   2  15  183.30   21.77
   3   2  15  107.18   17.24
   3   2  15  209.58   23.78
   3   2  15  203.57   23.11
   3   2  15  199.87   21.95
   3   2  16  330.25   29.23
   3   2  16  419.64   35.26
   3   2  16  372.73   33.21
   3   2  16  401.80   32.80
   3   2  17  350.54   29.38
   3   2  17  316.16   30.89
   3   2  17  355.73   32.81
   3   2  17  321.11   29.45
   3   2  18   78.35   12.78
   3   2  18   59.16   12.76
   3   2  18   77.43   14.88
   3   2  18   69.61   13.04
   3   2  19  365.52   33.20
   3   2  19  427.48   34.38
   3   2  19  394.52   31.38
   3   2  20    8.99    4.15
   3   2  20    6.36    3.99
   3   2  21  297.04   25.04
   3   2  21  283.02   22.87
   3   2  22   15.07    4.86
   3   3  -4   96.61   10.48
   3   3  -3  924.14   41.62
   3   3  -2   83.82   10.22
   3   3  -1  597.01   32.30
   3   3   0  941.96   44.37
   3   3   1  545.21   31.48
   3   3   2 1348.40   58.55
   3   3   3   52.23    9.58
   3   3   4 3220.05  116.67
   3   3   5  370.83   26.57
   3   3   6 2195.13   87.39
   3   3   7   94.96   13.13
   3   3   8 1190.24   57.18
   3   3   9  121.64   15.12
   3   3  10  616.80   38.03
   3   3  11  480.78   32.73
   3   3  12 1013.31   52.36
   3   3  12  984.82   52.07
   3   3  12 1037.55   58.11
   3   3  12 1041.38   53.96
   3   3  12 1013.29   51.70
   3   3  13   24.01    7.71
   3   3  13    9.41    4.54
   3   3  13   22.25    6.94
   3   3  13   20.32    6.15
   3   3  13   24.77    6.94
   3   3  14  534.77   42.37
   3   3  14  579.85   39.38
   3   3  14  589.23   40.03
   3   3  14  579.78   40.18
   3   3  14  588.27   38.61
   3   3  15  380.10   32.14
   3   3  15  399.18   36.12
   3   3  15  367.22   32.19
   3   3  15  413.23   33.40
   3   3  15  405.31   32.08
   3   3  16  260.61   26.27
   3   3  16  266.09   26.93
   3   3  16  209.44   23.91
   3   3  16  236.47   24.16
   3   3  17   29.76    7.75
   3   3  17   23.20    8.67
   3   3  17   29.04    8.05
   3   3  17   24.44    9.04
   3   3  17   31.03    8.40
   3   3  18  124.46   18.70
   3   3  18  152.09   20.42
   3   3  18  150.01   20.09
   3   3  18  127.67   17.72
   3   3  19  523.59   38.51
   3   3  19  494.84   38.24
   3   3  19  471.17   35.17
   3   3  20   57.19   11.43
   3   3  20   68.32   12.57
   3   3  20   49.61   10.32
   3   3  21  279.91   25.39
   3   3  21  259.78   23.75
   3   4  -4   42.11    7.62
   3   4  -3   31.45    7.00
   3   4  -2   18.59    4.96
   3   4  -1 1500.61   65.26
   3   4   0  199.83   19.06
   3   4   1  606.15   35.83
   3   4   1  539.99   21.99
   3   4   2 1635.99   66.05
   3   4   2 1287.98   46.90
   3   4   3  792.78   42.22
   3   4   3  623.99   27.31
   3   4   4  741.32   42.76
   3   4   5  439.65   31.52
   3   4   6 1399.49   65.82
   3   4   7   16.38    6.87
   3   4   8  741.12   44.35
   3   4   9  214.70   22.12
   3   4  10  428.02   32.47
   3   4  11   80.15   13.21
   3   4  12 1193.63   59.13
   3   4  12 1175.68   64.65
   3   4  12 1099.88   57.97
   3   4  12 1251.03   59.57
   3   4  12 1195.70   59.13
   3   4  12 1206.08   58.07
   3   4  13  132.34   17.38
   3   4  13  152.54   18.68
   3   4  13  158.57   21.55
   3   4  13  141.85   17.56
   3   4  13  164.08   19.12
   3   4  13  146.48   17.61
   3   4  14  280.33   26.14
   3   4  14  248.41   28.46
   3   4  14  273.89   25.73
   3   4  14  280.93   25.84
   3   4  14  239.33   23.53
   3   4  15  267.88   26.32
   3   4  15  245.39   28.99
   3   4  15  277.27   26.66
   3   4  15  247.84   25.18
   3   4  15  282.28   26.03
   3   4  16  304.97   28.95
   3   4  16  353.73   35.02
   3   4  16  300.28   28.58
   3   4  16  320.99   29.21
   3   4  16  304.87   28.13
   3   4  17  454.06   36.04
   3   4  17  421.62   34.32
   3   4  17  436.58   35.25
   3   4  17  440.29   34.05
   3   4  17  315.38   34.24
   3   4  18  115.14   17.61
   3   4  18   96.51   17.44
   3   4  18  115.06   17.29
   3   4  18  113.25   16.72
   3   4  18   93.39   14.67
   3   4  19  355.86   30.11
   3   4  19  374.16   31.54
   3   4  19  352.93   29.46
   3   4  20  211.06   22.79
   3   4  20  204.25   21.59
   3   4  21  290.52   25.76
   3   4  21  282.76   23.98
   3   4  22    9.15    3.58
   3   5  -3  663.62   40.16
   3   5  -2   64.50   11.27
   3   5  -1 1574.17   72.90
   3   5   0  223.87   22.89
   3   5   1 2051.99   89.18
   3   5   2  949.05   55.03
   3   5   2 1088.06   41.35
   3   5   3  901.60   52.83
   3   5   3  955.52   38.87
   3   5   4  947.92   52.48
   3   5   4  778.27   35.43
   3   5   5  727.00   44.89
   3   5   5  563.24   29.30
   3   5   6 1309.07   66.37
   3   5   6 1242.94   51.88
   3   5   7  203.46   22.87
   3   5   8 1422.02   72.03
   3   5   9   47.45   10.20
   3   5  10  340.85   30.85
   3   5  11    2.61    2.05
   3   5  11   13.08    5.84
   3   5  11    3.76    4.48
   3   5  11    4.02    3.52
   3   5  11   15.40    6.17
   3   5  11   -1.61    4.58
   3   5  12 1030.26   55.81
   3   5  12 1098.99   56.75
   3   5  12 1047.51   60.91
   3   5  12 1104.88   54.84
   3   5  12 1109.08   55.76
   3   5  12 1075.51   54.36
   3   5  13    1.75    4.11
   3   5  13    7.26    5.18
   3   5  13    6.33    5.60
   3   5  13    3.87    3.58
   3   5  13    2.33    3.47
   3   5  13   -0.26    4.44
   3   5  14  494.96   42.16
   3   5  14  516.76   37.70
   3   5  14  526.12   36.36
   3   5  14  514.34   36.87
   3   5  14  472.27   35.18
   3   5  15  329.69   29.91
   3   5  15  302.98   32.81
   3   5  15  294.68   26.98
   3   5  15  301.02   27.92
   3   5  15  326.34   28.53
   3   5  16  572.48   40.72
   3   5  16  550.35   38.16
   3   5  16  445.36   36.38
   3   5  16  583.36   47.30
   3   5  16  540.67   38.43
   3   5  17  213.66   24.32
   3   5  17  193.75   21.35
   3   5  17  191.83   22.66
   3   5  17  189.16   21.64
   3   5  17  186.00   26.11
   3   5  18  371.17   32.00
   3   5  18  421.20   33.75
   3   5  18  360.74   30.08
   3   5  18  344.20   34.79
   3   5  19  420.03   33.33
   3   5  19  384.47   31.93
   3   5  19  397.16   30.53
   3   5  19  384.85   35.14
   3   5  20  155.34   18.86
   3   5  20  126.95   15.80
   3   5  21  158.91   18.15
   3   5  22   97.66   12.95
   3   6  -3  792.75   48.94
   3   6  -2  172.75   21.31
   3   6  -1 1812.61   86.64
   3   6   0  327.67   31.01
   3   6   1  493.57   39.59
   3   6   2  291.65   29.65
   3   6   3 1450.40   78.09
   3   6   3 1562.73   59.82
   3   6   4  365.60   34.47
   3   6   4  388.44   23.57
   3   6   5  460.01   27.79
   3   6   5  606.21   44.21
   3   6   6  676.86   47.93
   3   6   6  572.94   32.67
   3   6   7  343.20   33.70
   3   6   7  353.37   24.80
   3   6   8 1007.72   62.23
   3   6   9  255.40   28.76
   3   6   9  252.38   23.43
   3   6   9  292.79   26.49
   3   6   9  303.73   26.01
   3   6   9  274.60   24.98
   3   6  10  553.10   43.92
   3   6  10  561.51   40.15
   3   6  10  624.72   39.78
   3   6  10  533.37   36.59
   3   6  10  528.53   37.34
   3   6  11   15.54    7.71
   3   6  11   12.67    6.83
   3   6  11   14.23    6.19
   3   6  11    9.56    5.42
   3   6  11   14.32    7.05
   3   6  12  873.06   54.11
   3   6  12  819.06   48.58
   3   6  12  856.03   49.57
   3   6  13    1.19    3.75
   3   6  13    6.51    3.28
   3   6  13   -1.75    2.53
   3   6  13    3.72    3.81
   3   6  14  588.80   40.93
   3   6  14  591.31   46.30
   3   6  14  593.59   40.23
   3   6  15   46.11   12.68
   3   6  15   26.11    8.35
   3   6  15   28.59    8.67
   3   6  15   18.42    5.31
   3   6  16  803.42   49.06
   3   6  16  606.31   43.00
   3   6  16  586.99   39.47
   3   6  16  758.40   53.92
   3   6  17  120.14   17.67
   3   6  17  116.88   20.68
   3   6  17  119.81   17.47
   3   6  18  297.88   28.18
   3   6  18  320.02   28.93
   3   6  18  321.52   33.10
   3   6  19  222.82   23.06
   3   6  19  213.84   22.65
   3   6  19  195.27   24.97
   3   6  20  315.19   26.76
   3   6  20  306.95   26.46
   3   6  21  243.37   21.76
   3   6  22   65.10   10.03
   3   7 -11   68.71   11.02
   3   7 -10  395.94   29.72
   3   7  -9   81.49   12.92
   3   7  -8  134.53   17.14
   3   7  -7  861.34   49.01
   3   7  -6  169.13   19.50
   3   7  -5  416.70   31.52
   3   7  -4   16.34    6.10
   3   7  -3 1118.34   57.03
   3   7  -2    3.87    4.81
   3   7  -2    0.14    2.75
   3   7  -1  778.21   54.36
   3   7  -1  757.30   44.34
   3   7   0   21.93    8.43
   3   7   0   28.62    8.21
   3   7   1 1293.91   77.42
   3   7   1 1475.68   67.43
   3   7   2  197.12   27.17
   3   7   2  234.59   22.60
   3   7   3  867.79   60.89
   3   7   3  929.16   50.61
   3   7   4   63.69   16.06
   3   7   4   87.05   13.65
   3   7   5 1158.21   52.59
   3   7   5  995.43   67.61
   3   7   5 1133.77   58.59
   3   7   6  357.91   38.04
   3   7   6  428.55   28.82
   3   7   6  443.16   33.23
   3   7   7  446.15   42.73
   3   7   7  500.33   32.68
   3   7   7  507.98   33.61
   3   7   7  530.14   36.44
   3   7   7  495.05   36.27
   3   7   8  446.25   42.17
   3   7   8  411.71   30.12
   3   7   8  398.87   30.33
   3   7   8  447.09   34.04
   3   7   8  471.24   35.29
   3   7   9  180.87   26.19
   3   7   9  185.80   22.17
   3   7   9  235.28   24.41
   3   7   9  182.26   20.02
   3   7   9  202.93   22.84
   3   7  10  467.88   43.80
   3   7  10  516.16   36.29
   3   7  10  520.92   38.62
   3   7  10  542.35   40.09
   3   7  10  522.25   38.46
   3   7  11    9.58    7.13
   3   7  11   11.37    3.94
   3   7  11    6.80    4.67
   3   7  11   18.92    7.33
   3   7  11   20.47    8.80
   3   7  12  344.06   36.36
   3   7  12  412.42   34.27
   3   7  12  408.39   36.14
   3   7  12  407.12   32.75
   3   7  13  141.72   19.67
   3   7  13  102.47   18.07
   3   7  13  117.86   17.16
   3   7  14  567.76   41.23
   3   7  14  476.71   37.15
   3   7  14  522.37   43.77
   3   7  15   58.31   12.38
   3   7  15   73.84   16.00
   3   7  15   48.45   11.13
   3   7  16  647.97   44.31
   3   7  16  623.86   42.91
   3   7  16  585.10   47.18
   3   7  17   15.87    9.12
   3   7  17   14.35    5.55
   3   7  17    6.09    4.18
   3   7  18  533.34   37.60
   3   7  18  498.37   36.12
   3   7  18  429.33   38.50
   3   7  19  131.50   16.80
   3   7  19  145.48   17.50
   3   7  20  392.24   28.84
   3   7  20  375.69   28.27
   3   7  21  135.46   14.70
   3   8  -8  391.66   29.38
   3   8  -7  389.20   29.85
   3   8  -6  319.30   27.06
   3   8  -5  472.90   34.28
   3   8  -4  144.59   17.95
   3   8  -3  590.41   39.19
   3   8  -2  276.81   25.44
   3   8  -1 1142.14   70.65
   3   8  -1 1045.86   56.44
   3   8   0   42.91   12.21
   3   8   0   35.66    8.84
   3   8   1  970.50   66.42
   3   8   1  927.68   52.57
   3   8   2    5.23    5.08
   3   8   2    1.22    4.14
   3   8   3  871.38   64.62
   3   8   3  978.31   53.84
   3   8   4   15.38   10.85
   3   8   4    3.05    4.37
   3   8   5  223.71   31.33
   3   8   5  230.94   24.45
   3   8   6   28.09   12.52
   3   8   6   28.00    8.33
   3   8   7  290.55   36.02
   3   8   7  311.44   28.85
   3   8   8  615.59   54.46
   3   8   8  660.40   42.40
   3   8   8  770.55   43.61
   3   8   8  758.14   47.05
   3   8   8  707.42   46.72
   3   8   9  293.80   36.41
   3   8   9  336.12   27.52
   3   8   9  347.71   32.09
   3   8   9  350.87   31.45
   3   8   9  369.00   32.22
   3   8  10  158.78   26.24
   3   8  10  211.27   24.68
   3   8  10  233.56   22.71
   3   8  10  194.11   23.37
   3   8  10  208.46   24.16
   3   8  11  234.99   26.45
   3   8  11  268.43   25.20
   3   8  11  224.93   26.16
   3   8  12  448.21   33.90
   3   8  12  460.51   37.82
   3   8  12  440.19   38.15
   3   8  13   19.25    7.37
   3   8  13   11.28    5.65
   3   8  14  343.53   31.92
   3   8  14  289.74   28.20
   3   8  14  359.74   34.46
   3   8  15    1.43    4.75
   3   8  15    2.53    5.45
   3   8  15    4.26    2.60
   3   8  16  568.54   40.65
   3   8  16  614.30   41.23
   3   8  16  493.82   41.82
   3   8  17   68.84   14.96
   3   8  17   47.82   10.73
   3   8  17   59.64   11.62
   3   8  18  335.69   27.79
   3   8  18  288.51   25.50
   3   8  19   18.58    6.15
   3   8  19   28.10    7.19
   3   8  20  384.99   26.63
   3   8  20  353.57   25.30
   3   8  21   40.74    6.77
   3   9  -6  410.02   29.00
   3   9  -5   83.98   12.77
   3   9  -4  207.51   21.11
   3   9  -3  341.22   28.05
   3   9  -2   52.39   10.30
   3   9  -1  540.31   37.24
   3   9   0   73.18   12.81
   3   9   1  762.54   46.54
   3   9   2   -3.63    6.16
   3   9   2    2.38    2.94
   3   9   3  300.92   37.03
   3   9   3  283.12   26.75
   3   9   4   56.87   17.05
   3   9   4   85.24   14.41
   3   9   5  321.25   39.20
   3   9   5  361.58   30.98
   3   9   6  152.32   19.78
   3   9   7  114.57   17.67
   3   9   8  532.35   40.12
   3   9   9  451.06   38.33
   3   9   9  397.40   34.51
   3   9  10  370.85   34.30
   3   9  10  367.25   32.11
   3   9  10  375.00   33.64
   3   9  11  284.75   29.56
   3   9  11  276.78   28.24
   3   9  12  208.55   24.72
   3   9  12  187.60   23.11
   3   9  13  285.39   29.09
   3   9  13  268.56   27.66
   3   9  14 1139.00   60.13
   3   9  14  962.54   57.31
   3   9  15   -1.51    4.35
   3   9  15   10.27    7.24
   3   9  15    3.58    2.78
   3   9  16  481.82   35.40
   3   9  16  456.17   33.50
   3   9  17   29.52    8.74
   3   9  17   21.11    5.88
   3   9  18  299.19   24.32
   3   9  18  252.04   21.73
   3   9  19   15.54    5.20
   3   9  19   12.93    5.11
   3   9  20  229.18   17.70
   3  10  -3  187.37   18.14
   3  10  -2  134.98   15.86
   3  10  -1  178.08   18.90
   3  10   0   71.79   12.31
   3  10   1  332.81   27.58
   3  10   2  189.97   20.73
   3  10   3  342.60   28.85
   3  10   4    9.58    5.75
   3  10   5  562.37   39.20
   3  10   6    8.39    5.02
   3  10   7  561.74   39.75
   3  10   8   97.60   15.66
   3  10   9  347.46   33.07
   3  10   9  352.99   31.13
   3  10  10  209.66   24.97
   3  10  11  480.42   38.32
   3  10  12  566.27   41.64
   3  10  13  246.37   25.75
   3  10  14  482.12   35.09
   3  10  14  382.57   29.88
   3  10  15  119.29   15.84
   3  10  15  112.88   14.71
   3  10  16  390.14   28.78
   3  10  16  363.96   26.38
   3  10  17    5.06    3.94
   3  10  17    7.58    3.71
   3  10  18  173.40   15.81
   3  10  18  149.08   13.47
   3  10  19   -8.57    3.16
   3  11   0  605.62   34.41
   3  11   1  581.47   34.50
   3  11   2  114.49   14.45
   3  11   3  619.22   37.41
   3  11   4   -2.96    3.07
   3  11   5  343.82   27.18
   3  11   6    3.08    3.41
   3  11   7  325.80   26.96
   3  11   8   49.48   11.21
   3  11   9  428.39   34.05
   3  11  10  104.52   15.87
   3  11  11  302.92   27.11
   3  11  12  156.77   18.31
   3  11  13  248.67   22.77
   3  11  13  224.87   19.47
   3  11  14  297.81   23.93
   3  11  14  274.15   20.58
   3  11  15   58.78    9.89
   3  11  15   60.67    8.68
   3  11  16  279.02   20.46
   3  11  17   69.09    8.83
   3  12   6   17.99    5.97
   3  12   7  455.09   30.75
   3  12   8   17.99    5.53
   3  12   9  272.41   22.58
   3  12  10   13.00    4.87
   3  12  11  280.78   21.89
   3  12  12   30.60    6.85
   3  12  13  302.92   20.86
   3  12  14   33.04    5.91
   3  13   2   11.39    3.42
   3  13   3  166.39   13.36
   3  13   4   23.54    4.87
   3  13   5  353.68   21.36
   3  13   6    6.59    2.77
   3  13   7  255.17   17.40
   3  13   8    9.79    3.10
   3  13   9  232.50   15.76
   4  -8   4  572.60   34.38
   4  -8   5    8.65    4.10
   4  -8   6  312.20   23.43
   4  -8   7   -1.95    2.35
   4  -8   8  259.90   20.18
   4  -8   9    3.05    2.10
   4  -7   3  143.49   17.61
   4  -7   4  418.91   31.65
   4  -7   5  345.49   28.47
   4  -7   6  480.66   34.12
   4  -7   7  303.33   26.22
   4  -7   8  191.48   19.99
   4  -7   9  130.80   15.60
   4  -7  10  269.02   22.15
   4  -7  11   18.05    5.06
   4  -7  12  308.12   20.21
   4  -6   3  541.09   38.03
   4  -6   4   88.55   14.06
   4  -6   5  511.88   38.04
   4  -6   6   74.07   13.16
   4  -6   7  723.95   46.46
   4  -6   8  321.36   29.04
   4  -6   9  195.79   19.36
   4  -6   9  205.47   22.47
   4  -6  10  296.01   24.01
   4  -6  10  308.66   27.18
   4  -6  11   82.21   11.77
   4  -6  11   97.39   14.15
   4  -6  12  404.25   26.66
   4  -6  12  445.60   30.07
   4  -6  13    6.21    3.53
   4  -6  13    4.28    2.33
   4  -6  14  234.86   16.08
   4  -6  14  250.32   17.76
   4  -5   2   22.22    8.46
   4  -5   3  550.28   38.38
   4  -5   4   64.97   13.11
   4  -5   5 1062.87   59.22
   4  -5   6  251.00   24.09
   4  -5   6  240.75   25.70
   4  -5   7  537.02   37.27
   4  -5   7  554.78   40.71
   4  -5   8  227.09   23.65
   4  -5   8  257.93   26.70
   4  -5   9  182.77   20.80
   4  -5   9  165.38   21.70
   4  -5  10  443.31   33.53
   4  -5  10  438.28   35.40
   4  -5  11   78.28   13.09
   4  -5  11  102.48   16.30
   4  -5  12  309.81   26.69
   4  -5  12  355.41   29.88
   4  -5  13   80.80   12.36
   4  -5  13  102.86   14.71
   4  -5  14  251.23   21.51
   4  -5  14  289.30   23.40
   4  -5  15   -2.82    2.12
   4  -5  15   -2.72    1.70
   4  -5  16  358.39   21.29
   4  -5  16  322.88   19.80
   4  -4   3  828.15   47.09
   4  -4   4   81.00   13.12
   4  -4   4   91.29   14.57
   4  -4   5  716.12   43.53
   4  -4   5  648.86   43.13
   4  -4   6   43.80   10.12
   4  -4   6   53.87   11.39
   4  -4   7  470.26   35.94
   4  -4   7  505.81   38.28
   4  -4   8  264.13   26.23
   4  -4   8  240.53   26.03
   4  -4   9  350.15   30.99
   4  -4   9  352.30   32.35
   4  -4  10  117.57   17.53
   4  -4  10  126.25   18.89
   4  -4  11   78.12   14.56
   4  -4  11   81.71   15.22
   4  -4  12  353.12   31.01
   4  -4  12  377.34   32.74
   4  -4  13   54.80   11.46
   4  -4  13   62.80   12.74
   4  -4  14  307.58   27.10
   4  -4  14  327.00   28.08
   4  -4  14  289.90   26.76
   4  -4  15   36.18    8.19
   4  -4  15   45.77    9.91
   4  -4  16  375.42   26.29
   4  -4  16  339.20   24.82
   4  -4  17    6.04    2.91
   4  -4  17    3.24    2.40
   4  -3   5 1266.83   62.13
   4  -3   6   12.94    6.43
   4  -3   6   11.93    5.13
   4  -3   7  581.04   40.52
   4  -3   7  598.31   40.78
   4  -3   8   55.53   12.07
   4  -3   8   68.43   13.18
   4  -3   9  597.44   42.51
   4  -3   9  608.48   42.87
   4  -3  10  375.66   33.09
   4  -3  10  375.83   33.18
   4  -3  11  179.87   22.34
   4  -3  11  168.38   21.64
   4  -3  12  364.99   33.12
   4  -3  12  378.37   33.66
   4  -3  13  100.28   16.96
   4  -3  13   98.17   16.57
   4  -3  14  513.94   38.71
   4  -3  14  516.40   38.33
   4  -3  14  485.45   38.29
   4  -3  15   71.83   13.20
   4  -3  15   68.51   12.91
   4  -3  16  625.07   39.56
   4  -3  16  562.78   37.73
   4  -3  17   25.14    6.71
   4  -3  17   24.50    6.74
   4  -3  18  138.17   14.50
   4  -3  18  135.99   13.27
   4  -3  19   -3.76    2.55
   4  -2   7  471.54   35.72
   4  -2   7  569.70   36.90
   4  -2   8  145.46   19.24
   4  -2   8  175.40   19.99
   4  -2   9  575.58   41.51
   4  -2   9  591.31   40.43
   4  -2  10   55.58   12.34
   4  -2  10   56.54   12.26
   4  -2  11  214.50   25.00
   4  -2  11  239.70   25.67
   4  -2  12  257.40   27.79
   4  -2  12  284.63   28.27
   4  -2  13  603.92   44.32
   4  -2  13  582.82   42.47
   4  -2  14  402.16   34.93
   4  -2  14  354.72   33.13
   4  -2  15  164.76   21.45
   4  -2  15  160.26   21.34
   4  -2  16  632.61   43.26
   4  -2  16  664.58   43.74
   4  -2  17   67.66   12.07
   4  -2  17   61.64   11.58
   4  -2  18  178.79   18.57
   4  -2  18  167.91   17.25
   4  -2  19   22.34    6.29
   4  -2  19   20.25    5.00
   4  -2  20  263.85   17.83
   4  -1   9  753.10   47.48
   4  -1   9  769.88   45.11
   4  -1  10   55.40   11.47
   4  -1  10   56.45   11.95
   4  -1  10   56.05   10.71
   4  -1  11  413.51   35.39
   4  -1  11  444.33   32.41
   4  -1  11  492.34   36.14
   4  -1  12  112.44   17.86
   4  -1  12  111.97   16.28
   4  -1  12   94.46   14.37
   4  -1  13  943.62   59.14
   4  -1  13 1043.17   55.08
   4  -1  14  239.10   27.06
   4  -1  14  286.33   26.08
   4  -1  14  258.77   27.90
   4  -1  15  280.84   28.97
   4  -1  15  239.47   23.46
   4  -1  15  238.48   26.46
   4  -1  16  636.84   45.15
   4  -1  16  677.97   41.19
   4  -1  16  679.82   46.06
   4  -1  17  167.28   20.75
   4  -1  17  167.01   17.86
   4  -1  17  166.43   20.34
   4  -1  18  269.24   24.75
   4  -1  18  248.98   23.41
   4  -1  19   34.80    7.96
   4  -1  19   41.35    8.53
   4  -1  20  384.46   24.89
   4  -1  20  363.81   23.16
   4   0  10   33.69    9.51
   4   0  10   39.29    9.57
   4   0  10   27.29    7.92
   4   0  11  944.25   54.74
   4   0  11  891.40   51.23
   4   0  12  151.37   20.28
   4   0  12  154.77   19.41
   4   0  12  183.56   22.39
   4   0  12  171.42   20.64
   4   0  13  920.08   55.07
   4   0  13  849.55   50.16
   4   0  13  953.71   54.03
   4   0  14   72.32   14.28
   4   0  14   91.74   15.17
   4   0  14   89.95   15.39
   4   0  15  446.30   36.96
   4   0  15  442.68   34.64
   4   0  15  423.26   35.94
   4   0  16  358.97   32.33
   4   0  16  327.76   29.20
   4   0  16  366.94   32.46
   4   0  17  327.37   29.84
   4   0  17  285.23   26.22
   4   0  17  279.44   27.48
   4   0  18  275.49   26.14
   4   0  18  273.18   24.34
   4   0  18  285.93   26.59
   4   0  19   62.25   11.13
   4   0  19   51.18   10.33
   4   0  20  457.38   29.18
   4   0  20  455.28   29.06
   4   0  21   22.85    5.15
   4   0  21   19.51    4.73
   4   1  10  197.25   19.66
   4   1  11 1696.73   76.80
   4   1  11 1517.24   72.06
   4   1  11 1764.94   78.43
   4   1  11 1600.38   75.73
   4   1  11 1739.82   75.51
   4   1  12    2.96    3.35
   4   1  12   11.11    6.10
   4   1  12    6.32    4.11
   4   1  12   10.71    5.32
   4   1  13 1230.60   62.35
   4   1  13  942.13   55.39
   4   1  13 1049.49   58.64
   4   1  13  828.90   54.03
   4   1  13 1197.95   60.31
   4   1  14   38.77    9.83
   4   1  14   21.67    6.91
   4   1  14   26.84    8.60
   4   1  14   33.59    9.61
   4   1  15  149.34   20.34
   4   1  15  202.63   23.31
   4   1  15  134.51   19.93
   4   1  15  184.63   22.19
   4   1  16  160.60   20.79
   4   1  16  188.40   22.47
   4   1  16  152.97   21.03
   4   1  16  174.37   21.58
   4   1  17  535.90   39.12
   4   1  17  557.73   39.98
   4   1  17  496.99   38.15
   4   1  18  125.62   16.99
   4   1  18  125.91   17.67
   4   1  18  130.21   17.57
   4   1  19   43.03    9.08
   4   1  19   42.20    9.55
   4   1  19   35.79    9.03
   4   1  20  236.97   20.13
   4   1  20  222.84   20.55
   4   1  21  131.82   13.64
   4   2   0  132.77   14.97
   4   2   1  258.91   21.68
   4   2   2 1720.94   73.18
   4   2   3  420.24   29.60
   4   2   4 1434.32   65.82
   4   2   5  775.17   44.24
   4   2   6  324.77   27.05
   4   2  11 1508.49   69.51
   4   2  11 1616.68   74.97
   4   2  11 1521.16   69.41
   4   2  11 1590.16   71.86
   4   2  11 1522.93   72.69
   4   2  11 1619.80   71.10
   4   2  12    7.22    5.04
   4   2  12   -0.59    4.78
   4   2  12   -1.82    5.08
   4   2  12   -0.12    3.29
   4   2  12   -1.25    4.40
   4   2  12    1.65    3.28
   4   2  13 1023.61   56.35
   4   2  13 1047.46   57.08
   4   2  13 1067.79   60.38
   4   2  13 1082.46   60.04
   4   2  13 1120.90   59.09
   4   2  13 1087.41   57.26
   4   2  14  156.26   21.00
   4   2  14  234.02   24.07
   4   2  14  173.06   20.72
   4   2  14  249.42   26.19
   4   2  14  196.29   22.76
   4   2  14  233.67   23.98
   4   2  15  302.52   29.88
   4   2  15  306.36   28.47
   4   2  15  372.32   32.72
   4   2  15  308.16   29.89
   4   2  16   68.48   13.67
   4   2  16   83.25   14.15
   4   2  16   67.46   13.73
   4   2  16   95.56   16.11
   4   2  16   84.90   14.90
   4   2  17  215.24   22.73
   4   2  17  214.20   24.21
   4   2  17  159.24   21.36
   4   2  17  244.26   25.03
   4   2  18   82.76   13.04
   4   2  18   68.86   13.44
   4   2  18   85.55   14.84
   4   2  18   95.41   15.54
   4   2  19  282.63   26.51
   4   2  19  273.16   25.36
   4   2  20  227.95   21.27
   4   2  21  109.20   13.16
   4   3  -3    8.47    3.63
   4   3  -2 1608.11   67.92
   4   3  -1   60.81   10.04
   4   3   0  211.05   19.94
   4   3   1   88.72   12.82
   4   3   2 1763.94   75.85
   4   3   3  261.43   23.77
   4   3   4 2386.36   96.88
   4   3   5  305.78   26.34
   4   3   6 1324.20   65.07
   4   3   7  151.85   18.89
   4   3   8  508.51   36.79
   4   3   9 1284.10   65.68
   4   3  11  640.41   40.07
   4   3  11  723.65   45.39
   4   3  11  676.85   40.27
   4   3  11  676.16   42.36
   4   3  11  666.77   39.89
   4   3  12   31.63    8.22
   4   3  12   40.05   10.43
   4   3  12   25.40    7.47
   4   3  12   28.93    7.73
   4   3  12   40.74    9.49
   4   3  13  656.98   43.23
   4   3  13  707.45   48.17
   4   3  13  721.55   44.63
   4   3  13  743.72   46.80
   4   3  13  774.60   45.04
   4   3  14    0.76    3.22
   4   3  14   -4.46    5.59
   4   3  14    4.91    4.52
   4   3  14   -1.82    4.63
   4   3  14    0.63    2.61
   4   3  15  168.46   20.56
   4   3  15  171.29   22.56
   4   3  15  162.99   21.09
   4   3  15  123.00   17.48
   4   3  15  148.47   19.07
   4   3  16    6.54    5.63
   4   3  16    9.68    4.18
   4   3  16    3.55    3.92
   4   3  16    1.68    4.07
   4   3  16    1.53    2.85
   4   3  17  248.52   27.15
   4   3  17  255.33   26.47
   4   3  17  305.89   29.44
   4   3  17  318.60   28.61
   4   3  18  117.07   17.29
   4   3  18   98.87   16.11
   4   3  18  139.21   18.86
   4   3  18  112.12   16.47
   4   3  19  198.32   21.76
   4   3  19  193.25   21.86
   4   3  19  186.36   20.41
   4   3  20  131.19   16.75
   4   3  20  124.52   15.67
   4   4  -3   17.69    5.80
   4   4  -2 1833.13   77.95
   4   4  -1   62.94   10.82
   4   4   0  977.29   51.83
   4   4   1   10.68    4.82
   4   4   2 1955.89   84.40
   4   4   3  157.84   18.76
   4   4   4  933.23   52.32
   4   4   5  391.75   31.63
   4   4   6  568.41   39.75
   4   4   7  168.10   20.77
   4   4   8  446.13   35.49
   4   4   9  636.67   43.91
   4   4  10  551.53   36.13
   4   4  10  552.07   38.19
   4   4  10  560.32   41.10
   4   4  10  553.36   36.31
   4   4  10  582.57   35.53
   4   4  11  748.47   46.92
   4   4  11  712.55   43.04
   4   4  11  760.59   43.18
   4   4  11  651.57   41.52
   4   4  11  734.45   41.77
   4   4  12  102.37   16.30
   4   4  12  104.76   16.76
   4   4  12   83.51   13.47
   4   4  12  125.48   16.86
   4   4  12   93.59   14.93
   4   4  12   98.92   14.39
   4   4  13  635.03   45.74
   4   4  13  622.73   40.90
   4   4  13  603.68   41.52
   4   4  13  606.96   41.24
   4   4  13  615.59   39.65
   4   4  14    4.61    5.94
   4   4  14   12.22    8.27
   4   4  14    6.31    2.46
   4   4  14   -1.16    5.90
   4   4  14   -4.41    6.03
   4   4  14    0.83    3.63
   4   4  15  684.89   45.02
   4   4  15  742.75   51.55
   4   4  15  570.71   40.86
   4   4  15  684.29   45.56
   4   4  15  742.48   45.23
   4   4  16   41.68   10.38
   4   4  16   34.40   11.08
   4   4  16   28.25    8.25
   4   4  16   40.76   10.55
   4   4  16   42.99    9.81
   4   4  17  444.29   38.39
   4   4  17  462.70   36.36
   4   4  17  345.43   31.32
   4   4  17  464.81   36.07
   4   4  17  507.96   36.24
   4   4  18   37.09    9.12
   4   4  18   24.44    6.95
   4   4  18   26.80    8.10
   4   4  18   36.97    9.66
   4   4  19  345.78   29.44
   4   4  19  314.86   29.44
   4   4  20  107.52   14.59
   4   4  20   99.20   14.32
   4   4  21  164.95   17.34
   4   5  -3   65.35   11.67
   4   5  -2 1381.00   67.62
   4   5  -1  149.69   18.68
   4   5   0 1255.96   64.81
   4   5   1   96.57   15.44
   4   5   2  961.19   55.59
   4   5   3   18.90    8.16
   4   5   4 1399.84   71.99
   4   5   5  216.39   24.48
   4   5   6  900.26   55.36
   4   5   7  190.76   23.27
   4   5   8  347.82   32.44
   4   5   9  664.65   47.46
   4   5   9  682.63   41.14
   4   5   9  676.03   42.33
   4   5   9  662.39   40.06
   4   5  10  663.69   47.56
   4   5  10  641.57   41.00
   4   5  10  658.17   40.50
   4   5  10  707.04   44.66
   4   5  10  679.47   40.05
   4   5  10  629.38   39.67
   4   5  11  229.53   26.84
   4   5  11  329.62   30.13
   4   5  11  320.17   27.66
   4   5  11  323.06   27.20
   4   5  11  299.28   25.57
   4   5  12   68.50   15.04
   4   5  12   97.10   14.83
   4   5  12   79.78   14.12
   4   5  12   64.51   13.61
   4   5  12   91.32   13.85
   4   5  13  718.03   44.93
   4   5  13  691.18   48.79
   4   5  13  681.54   44.96
   4   5  13  631.57   41.17
   4   5  14   35.45    9.83
   4   5  14   20.35    8.09
   4   5  14   25.32    7.70
   4   5  14   22.42    6.97
   4   5  15  436.23   39.15
   4   5  15  432.26   34.57
   4   5  15  360.03   30.56
   4   5  15  442.38   33.64
   4   5  16   34.55   17.02
   4   5  16   30.21    8.70
   4   5  16   20.20    6.87
   4   5  16   19.54    6.84
   4   5  17  623.93   43.22
   4   5  17  612.87   47.39
   4   5  17  706.74   43.70
   4   5  17  599.62   41.18
   4   5  18   10.56    6.97
   4   5  18   16.81    8.50
   4   5  18   13.44    6.71
   4   5  18   25.45    8.52
   4   5  19  315.33   27.21
   4   5  19  392.69   33.04
   4   5  20   87.87   14.11
   4   5  20   89.85   13.24
   4   5  21  461.14   29.67
   4   6 -15  212.44   16.72
   4   6  -2  467.97   37.41
   4   6  -1   25.63    9.01
   4   6  -1   17.42    5.80
   4   6   0  493.22   40.04
   4   6   0  533.42   35.61
   4   6   1  245.14   27.50
   4   6   2 1870.14   91.48
   4   6   3    4.30    3.40
   4   6   4 1259.51   71.17
   4   6   5   60.92   13.80
   4   6   6 1241.20   71.52
   4   6   6 1227.78   60.46
   4   6   6 1242.32   62.02
   4   6   7  148.33   21.92
   4   6   7  165.33   18.74
   4   6   7  164.29   18.36
   4   6   7  176.10   19.06
   4   6   7  148.91   18.28
   4   6   8  508.27   43.30
   4   6   8  530.00   36.72
   4   6   8  543.83   36.73
   4   6   8  566.07   37.30
   4   6   8  562.10   38.18
   4   6   9  188.77   25.28
   4   6   9  171.89   19.73
   4   6   9  174.72   20.19
   4   6   9  176.76   19.73
   4   6   9  161.25   19.51
   4   6  10  647.22   48.88
   4   6  10  575.17   39.67
   4   6  10  608.66   40.39
   4   6  10  581.12   41.23
   4   6  10  607.73   40.55
   4   6  11  292.79   32.51
   4   6  11  322.48   29.01
   4   6  11  334.83   30.77
   4   6  11  373.07   30.48
   4   6  11  329.75   29.27
   4   6  12  122.86   19.96
   4   6  12   99.05   15.52
   4   6  12  121.76   17.60
   4   6  12  124.33   19.00
   4   6  12  121.75   16.61
   4   6  13  367.65   34.43
   4   6  13  351.33   30.79
   4   6  13  333.97   30.81
   4   6  13  359.12   29.73
   4   6  14  102.84   16.85
   4   6  14  109.19   19.05
   4   6  14  113.84   17.12
   4   6  15  436.28   39.32
   4   6  15  433.05   35.32
   4   6  15  479.84   34.76
   4   6  16   54.99   12.08
   4   6  16   47.79   12.82
   4   6  16   51.60   10.77
   4   6  17  539.55   39.26
   4   6  17  573.91   38.35
   4   6  17  547.26   44.48
   4   6  18    2.41    4.25
   4   6  18    3.31    4.53
   4   6  18    3.27    3.64
   4   6  19  514.13   36.12
   4   6  19  551.38   35.65
   4   6  19  517.60   39.30
   4   6  20   57.17   11.54
   4   6  20   59.84   10.19
   4   6  21  403.36   25.81
   4   7 -13  274.04   20.23
   4   7 -12  140.62   15.41
   4   7 -11  382.69   28.94
   4   7 -10    6.09    4.73
   4   7  -9  781.95   47.15
   4   7  -5  797.94   48.21
   4   7  -4  190.97   21.35
   4   7  -3  150.66   19.02
   4   7  -2  312.47   27.43
   4   7  -1  288.77   31.55
   4   7  -1  308.96   27.13
   4   7   0  553.62   45.96
   4   7   0  578.31   39.03
   4   7   1   77.52   16.79
   4   7   1  137.34   17.91
   4   7   2  354.83   36.80
   4   7   2  431.56   32.95
   4   7   3  100.50   19.23
   4   7   3   92.31   14.98
   4   7   4 1328.34   62.78
   4   7   4 1288.48   65.29
   4   7   5    2.18    5.40
   4   7   5    2.33    3.54
   4   7   5   -2.74    3.80
   4   7   6 1213.84   76.10
   4   7   6 1344.62   64.12
   4   7   6 1269.89   65.77
   4   7   7   14.42    8.78
   4   7   7    6.55    5.81
   4   7   7    1.05    2.91
   4   7   7    4.48    5.90
   4   7   8  824.20   60.59
   4   7   8  881.22   50.18
   4   7   8  938.48   53.17
   4   7   8  832.30   49.66
   4   7   8  824.76   51.14
   4   7   9  199.52   28.12
   4   7   9  202.26   22.07
   4   7   9  225.79   23.91
   4   7   9  212.40   23.50
   4   7   9  224.27   24.50
   4   7  10  584.82   49.55
   4   7  10  564.98   39.56
   4   7  10  622.18   42.40
   4   7  10  559.58   40.97
   4   7  10  563.06   40.65
   4   7  11   70.19   16.75
   4   7  11   64.75   12.93
   4   7  11   54.19   12.54
   4   7  11   68.13   13.18
   4   7  11   45.89   11.52
   4   7  12  202.82   23.00
   4   7  12  247.42   27.13
   4   7  12  235.34   25.32
   4   7  13  322.21   30.22
   4   7  13  287.98   28.37
   4   7  13  300.37   30.75
   4   7  14   60.23   12.35
   4   7  14   57.59   13.83
   4   7  14   63.39   13.20
   4   7  15  289.50   28.35
   4   7  15  304.04   31.52
   4   7  16  317.00   29.69
   4   7  16  306.72   26.68
   4   7  16  333.13   33.17
   4   7  17  749.30   47.02
   4   7  17  748.32   43.98
   4   7  17  702.01   50.39
   4   7  18   22.86    7.80
   4   7  18   30.99    8.60
   4   7  18   34.57    8.24
   4   7  19  310.13   26.37
   4   7  19  353.85   25.89
   4   7  19  322.25   29.27
   4   7  20    5.11    3.27
   4   8 -11  388.74   25.00
   4   8 -10   26.25    5.93
   4   8  -9  620.16   37.98
   4   8  -8    2.14    3.52
   4   8  -7  517.48   36.46
   4   8  -6   59.66   11.65
   4   8  -5  679.81   43.66
   4   8  -4   80.14   14.39
   4   8  -3  440.13   34.11
   4   8  -2  407.97   32.68
   4   8  -1  159.45   19.66
   4   8   0  274.07   32.88
   4   8   0  314.97   28.38
   4   8   1   26.38   11.17
   4   8   1   30.72    8.03
   4   8   2  188.75   27.82
   4   8   2  199.14   22.51
   4   8   3   58.08   16.25
   4   8   3   82.86   13.35
   4   8   3   80.87   14.07
   4   8   4   33.39   12.77
   4   8   4   24.09    7.18
   4   8   4   24.97    7.53
   4   8   5   18.55   10.73
   4   8   5   13.39    5.43
   4   8   5   16.16    6.54
   4   8   6  774.03   61.72
   4   8   6  885.98   48.98
   4   8   6  845.57   51.96
   4   8   7   63.98   16.49
   4   8   7   63.40   11.69
   4   8   7   45.04   10.72
   4   8   8  620.57   55.08
   4   8   8  731.31   44.59
   4   8   8  722.42   45.52
   4   8   8  780.59   49.89
   4   8   8  685.35   46.75
   4   8   9   12.04   10.57
   4   8   9    4.13    2.92
   4   8   9   14.73    7.20
   4   8   9    1.98    5.32
   4   8   9   -0.56    3.44
   4   8  10  613.06   40.73
   4   8  10  595.93   43.51
   4   8  10  547.43   40.89
   4   8  10  581.65   42.83
   4   8  11  242.58   26.56
   4   8  11  243.12   24.65
   4   8  11  210.61   24.65
   4   8  11  228.33   25.61
   4   8  12  350.52   30.15
   4   8  12  374.08   33.94
   4   8  12  318.33   31.23
   4   8  13   86.35   15.57
   4   8  13   74.64   13.73
   4   8  13   84.83   15.01
   4   8  14  449.97   36.66
   4   8  14  465.84   38.74
   4   8  15  493.52   37.95
   4   8  15  472.29   39.06
   4   8  16  166.78   20.51
   4   8  16  178.73   22.95
   4   8  17  589.44   39.25
   4   8  17  523.19   39.88
   4   8  18  179.39   19.45
   4   8  18  173.59   21.10
   4   8  19  400.08   28.58
   4   8  20   -2.59    3.02
   4   9  -9  474.42   27.37
   4   9  -8    7.75    3.94
   4   9  -7  356.23   26.49
   4   9  -6   -1.29    3.94
   4   9  -5  390.16   29.83
   4   9  -4   48.46   10.38
   4   9  -3  248.56   24.20
   4   9  -2  280.97   26.10
   4   9  -1  466.94   35.11
   4   9   0  121.74   14.91
   4   9   0  140.26   18.41
   4   9   1  170.46   17.92
   4   9   1  160.90   20.14
   4   9   2   61.83   10.35
   4   9   2   73.15   13.50
   4   9   3  773.80   42.69
   4   9   3  681.46   45.64
   4   9   4  551.27   35.06
   4   9   4  495.10   37.98
   4   9   5   93.24   13.47
   4   9   5  119.88   17.73
   4   9   6 1051.73   53.20
   4   9   6  953.12   57.23
   4   9   7   26.12    7.08
   4   9   7   28.96    9.47
   4   9   8  815.99   45.80
   4   9   8  816.88   53.06
   4   9   8  735.07   49.40
   4   9   9    7.76    5.78
   4   9   9    7.81    5.03
   4   9   9    0.41    3.41
   4   9  10  627.59   39.85
   4   9  10  632.57   45.86
   4   9  10  617.95   42.28
   4   9  10  630.58   44.83
   4   9  11    0.75    3.68
   4   9  11    5.17    3.52
   4   9  11    9.43    6.85
   4   9  12  550.19   41.37
   4   9  12  517.89   35.24
   4   9  12  496.56   38.22
   4   9  13  252.88   26.71
   4   9  13  234.64   22.46
   4   9  13  231.89   25.07
   4   9  14  263.47   26.58
   4   9  14  224.07   24.80
   4   9  15   83.19   13.96
   4   9  15   70.64   13.24
   4   9  16  379.32   30.31
   4   9  16  358.86   30.36
   4   9  17  313.56   26.28
   4   9  17  323.21   27.47
   4   9  18  115.97   14.43
   4   9  19  137.95   14.56
   4   9  20   48.19    7.48
   4  10  -6   -0.98    2.00
   4  10  -5  328.57   23.64
   4  10  -4   -3.00    4.12
   4  10  -3  518.77   33.52
   4  10  -2  228.06   21.43
   4  10  -1  339.25   27.43
   4  10   0   51.14   10.32
   4  10   1  520.58   36.20
   4  10   2   97.28   15.33
   4  10   3  842.84   49.55
   4  10   4  578.65   39.71
   4  10   5  199.38   22.41
   4  10   6  663.34   43.72
   4  10   7  146.22   19.04
   4  10   8  266.52   27.87
   4  10   8  253.40   25.80
   4  10   9   23.92    8.08
   4  10   9   16.13    6.73
   4  10  10  569.56   42.08
   4  10  11   75.14   13.94
   4  10  12  338.81   30.63
   4  10  12  355.45   28.32
   4  10  13   46.31   10.90
   4  10  14  315.38   27.51
   4  10  15   67.55   11.60
   4  10  16   94.77   13.09
   4  10  17   78.37   11.49
   4  10  18  225.12   17.99
   4  11  -3  235.66   17.60
   4  11  -2   -0.81    1.94
   4  11  -1  420.20   27.18
   4  11   0   37.47    7.78
   4  11   1  307.07   24.00
   4  11   2  177.33   18.09
   4  11   3  561.98   35.50
   4  11   4  440.47   31.04
   4  11   5  110.53   14.85
   4  11   6  289.35   26.72
   4  11   6  335.42   27.07
   4  11   7   65.78   12.31
   4  11   7   78.17   12.28
   4  11   8  271.75   25.82
   4  11   8  280.42   24.61
   4  11   9   23.52    7.18
   4  11  10  448.39   33.60
   4  11  11    7.83    4.15
   4  11  12  366.77   28.40
   4  11  13    9.84    5.06
   4  11  14  270.22   22.15
   4  11  15   33.08    6.84
   4  11  16  279.32   19.95
   4  11  17   70.51    8.45
   4  12   1  294.47   18.92
   4  12   2   72.73    9.19
   4  12   3  197.26   16.30
   4  12   4   85.15   11.48
   4  12   4   84.94   10.68
   4  12   5  106.34   13.23
   4  12   6  186.80   17.91
   4  12   7   74.39   10.90
   4  12   8  159.51   16.49
   4  12   9   34.54    7.57
   4  12  10  201.45   17.93
   4  12  11   44.71    7.99
   4  12  12  161.13   14.87
   4  12  13    0.56    1.43
   4  12  14  219.48   15.58
   4  13   6  104.65    9.88
   4  13   7   95.86    9.38
   5  -7  11   71.19    8.20
   5  -6   4  548.07   36.54
   5  -6   5    4.44    3.72
   5  -6   6  529.04   35.90
   5  -6   7   49.20   10.02
   5  -6   8  281.66   24.35
   5  -6  12   83.73   10.38
   5  -6  13  118.84   11.10
   5  -5   3  209.12   21.93
   5  -5   4  510.39   36.84
   5  -5   5   24.14    8.11
   5  -5   6  636.17   39.48
   5  -5   6  584.83   41.16
   5  -5   7    6.21    2.97
   5  -5   7    1.27    3.52
   5  -5   8  484.51   33.70
   5  -5   8  467.79   35.57
   5  -5   9   60.51   11.13
   5  -5   9   51.61   11.30
   5  -5  10  333.37   26.39
   5  -5  11   75.97   11.73
   5  -5  12  290.43   22.74
   5  -5  13  108.68   12.29
   5  -5  13   77.63   11.26
   5  -5  14   77.62    9.43
   5  -5  14   70.22    9.67
   5  -5  15  101.31    9.78
   5  -4   3  323.68   27.71
   5  -4   3  309.42   27.38
   5  -4   4  470.47   35.17
   5  -4   4  529.21   37.53
   5  -4   5   66.00   12.14
   5  -4   5   59.02   12.37
   5  -4   6  814.45   49.20
   5  -4   6  788.51   49.65
   5  -4   7   21.81    7.72
   5  -4   7   23.25    8.80
   5  -4   8  490.44   36.78
   5  -4   8  501.55   38.51
   5  -4   9   -1.21    3.33
   5  -4   9   -4.56    4.38
   5  -4  10  339.47   29.65
   5  -4  10  352.21   31.03
   5  -4  11  171.67   20.15
   5  -4  12  316.20   27.07
   5  -4  13  154.16   17.77
   5  -4  13  173.86   19.97
   5  -4  14  250.52   21.56
   5  -4  14  246.79   22.25
   5  -4  15   71.61   10.15
   5  -4  15   55.00    9.27
   5  -4  16  136.89   12.82
   5  -4  16  150.64   13.43
   5  -3   0  320.16   25.91
   5  -3   1  282.63   24.94
   5  -3   2  464.51   33.70
   5  -3   3  634.82   41.36
   5  -3   3  632.73   39.74
   5  -3   4  274.94   26.50
   5  -3   4  305.38   27.04
   5  -3   5  166.52   20.49
   5  -3   5  164.78   20.13
   5  -3   6  497.77   38.40
   5  -3   6  564.66   39.61
   5  -3   7  174.69   21.87
   5  -3   7  159.05   20.53
   5  -3   8  538.80   40.51
   5  -3   8  525.33   39.70
   5  -3   9    2.13    3.67
   5  -3   9    0.44    2.91
   5  -3  10  504.64   39.12
   5  -3  10  512.90   39.33
   5  -3  11    6.91    4.80
   5  -3  12  384.80   32.89
   5  -3  13   36.82    9.67
   5  -3  14  452.53   33.87
   5  -3  14  462.60   35.17
   5  -3  15   29.63    7.45
   5  -3  15   31.01    7.86
   5  -3  16  359.98   25.55
   5  -3  16  279.33   23.15
   5  -3  17  161.27   14.87
   5  -3  17  136.03   13.54
   5  -2   3  761.36   45.96
   5  -2   4   59.05   11.75
   5  -2   4   77.83   12.62
   5  -2   5  183.92   21.35
   5  -2   5  147.54   18.31
   5  -2   6  492.92   37.54
   5  -2   6  492.16   35.82
   5  -2   7  147.99   20.07
   5  -2   7  155.92   19.85
   5  -2   8  399.79   34.59
   5  -2   8  440.57   34.78
   5  -2   9   73.28   13.95
   5  -2   9   79.47   14.17
   5  -2  10  534.52   41.44
   5  -2  11   29.05    9.01
   5  -2  12  464.75   38.25
   5  -2  13    3.79    3.72
   5  -2  13    0.04    5.50
   5  -2  14  518.97   39.15
   5  -2  14  556.77   41.26
   5  -2  15   22.92    7.67
   5  -2  15    5.69    3.91
   5  -2  16  333.85   27.20
   5  -2  16  292.15   26.06
   5  -2  17   88.30   12.35
   5  -2  17   67.03   11.27
   5  -2  18  214.75   17.80
   5  -2  18  214.32   17.66
   5  -1   5  530.22   37.32
   5  -1   6  196.93   22.03
   5  -1   7  646.64   43.77
   5  -1   8  747.03   44.49
   5  -1   8  729.78   48.26
   5  -1   9  127.23   19.02
   5  -1   9  109.46   15.78
   5  -1  10  662.89   47.10
   5  -1  11  159.50   21.85
   5  -1  12  625.27   45.89
   5  -1  13    3.00    3.91
   5  -1  13    2.99    4.63
   5  -1  14  889.57   56.13
   5  -1  14  980.10   58.48
   5  -1  15   15.47    6.36
   5  -1  15   24.95    8.64
   5  -1  16  358.59   30.45
   5  -1  16  339.35   30.41
   5  -1  17   97.52   14.15
   5  -1  17   88.30   13.55
   5  -1  18  227.31   20.14
   5  -1  18  169.44   17.71
   5  -1  19   66.64    9.37
   5  -1  19   57.24    8.92
   5   0   7  488.92   35.15
   5   0   7  569.53   38.71
   5   0   8  399.79   31.53
   5   0   8  421.01   33.71
   5   0   9  405.50   32.16
   5   0   9  387.06   32.90
   5   0  10  559.72   39.68
   5   0  10  705.00   46.33
   5   0  11   65.89   13.61
   5   0  11   46.04   10.83
   5   0  11   67.40   13.02
   5   0  12  572.27   43.52
   5   0  12  610.55   42.62
   5   0  13    3.79    5.21
   5   0  13    9.18    6.81
   5   0  14  882.24   56.16
   5   0  14 1008.36   58.84
   5   0  15    3.42    3.00
   5   0  15   -4.04    6.30
   5   0  16  345.69   30.86
   5   0  16  385.40   32.61
   5   0  17   65.62   12.34
   5   0  17   54.65   11.27
   5   0  18  457.58   32.20
   5   0  18  481.80   33.54
   5   0  19   52.36    8.95
   5   0  19   33.89    7.63
   5   0  20  126.03   12.09
   5   0  20  145.49   13.54
   5   1   8  901.54   50.93
   5   1   8  890.99   50.75
   5   1   9  197.09   21.99
   5   1   9  225.58   23.54
   5   1   9  213.93   21.03
   5   1  10  679.08   43.78
   5   1  10  688.48   44.65
   5   1  10  604.42   37.52
   5   1  10  663.96   41.65
   5   1  11  903.56   53.87
   5   1  11  868.98   52.10
   5   1  11  903.48   51.44
   5   1  12  272.09   27.32
   5   1  12  343.51   31.23
   5   1  12  374.35   31.17
   5   1  13   59.16   12.03
   5   1  13   40.61   10.26
   5   1  13   59.30   12.26
   5   1  14  627.32   42.66
   5   1  14  656.75   45.26
   5   1  14  653.65   44.82
   5   1  15   37.63    9.91
   5   1  15   24.68    7.73
   5   1  16  591.53   41.58
   5   1  16  630.01   43.65
   5   1  17   18.76    6.74
   5   1  17   25.74   10.29
   5   1  18  409.29   30.04
   5   1  18  381.78   30.51
   5   1  19   10.96    4.75
   5   1  19    6.62    2.97
   5   1  20  309.85   20.78
   5   1  20  311.99   22.86
   5   1  21   27.48    5.53
   5   2   8  425.62   32.53
   5   2   8  427.80   31.47
   5   2   9  593.84   37.08
   5   2   9  631.72   40.69
   5   2   9  665.33   42.61
   5   2   9  653.86   38.94
   5   2  10  616.95   39.05
   5   2  10  673.99   44.31
   5   2  10  723.73   43.86
   5   2  10  649.19   40.34
   5   2  11  472.46   33.95
   5   2  11  479.47   37.24
   5   2  11  512.33   36.70
   5   2  11  482.57   34.04
   5   2  11  506.50   35.20
   5   2  12  121.52   16.89
   5   2  12  151.07   20.27
   5   2  12  140.92   18.72
   5   2  12  152.47   18.21
   5   2  12  165.55   19.39
   5   2  13  400.20   34.62
   5   2  13  413.31   33.51
   5   2  13  442.29   34.13
   5   2  14  121.38   17.46
   5   2  14   99.22   17.43
   5   2  14  142.62   18.77
   5   2  15    5.46    4.65
   5   2  15    3.71    4.13
   5   2  15   12.11    5.89
   5   2  16  358.77   30.58
   5   2  16  294.08   27.25
   5   2  16  369.27   31.26
   5   2  17    0.06    4.56
   5   2  17    8.01    4.62
   5   2  18  403.95   29.90
   5   2  18  570.39   36.97
   5   2  19    4.30    2.83
   5   2  19    3.21    3.23
   5   2  20  211.71   19.18
   5   2  21   30.64    6.60
   5   3   2   25.79    8.61
   5   3   3  999.61   57.15
   5   3   4  292.96   28.62
   5   3   5  457.82   37.05
   5   3   8  319.22   25.46
   5   3   8  312.96   27.11
   5   3   9  778.26   45.03
   5   3   9  862.00   47.11
   5   3   9  790.99   48.33
   5   3   9  834.24   44.97
   5   3  10  406.24   31.08
   5   3  10  429.32   30.82
   5   3  10  439.42   34.59
   5   3  10  479.19   33.49
   5   3  10  442.50   31.73
   5   3  11  598.79   42.78
   5   3  11  584.86   39.18
   5   3  11  636.82   39.66
   5   3  11  633.88   40.16
   5   3  11  619.84   39.48
   5   3  12  481.79   37.74
   5   3  12  361.48   30.03
   5   3  12  335.96   29.21
   5   3  12  457.15   33.54
   5   3  12  476.91   33.65
   5   3  13  108.19   15.86
   5   3  13  163.09   19.47
   5   3  13  148.80   18.46
   5   3  13  177.64   22.48
   5   3  13  151.63   18.81
   5   3  14  367.23   31.43
   5   3  14  396.80   31.40
   5   3  14  509.57   39.72
   5   3  14  503.49   35.90
   5   3  15   69.66   12.42
   5   3  15   45.25   11.70
   5   3  15   72.75   13.57
   5   3  16  439.56   36.73
   5   3  16  446.81   34.53
   5   3  17   -2.77    3.18
   5   3  17    6.20    5.48
   5   3  18  164.21   19.24
   5   3  18  246.42   23.24
   5   3  19   32.54    8.03
   5   3  20  324.82   24.66
   5   4  -1  982.68   55.35
   5   4   0  573.45   40.57
   5   4   1  772.42   48.93
   5   4   2   48.01   11.57
   5   4   3  784.19   50.22
   5   4   4  363.97   32.72
   5   4   5  888.61   55.58
   5   4   6    8.66    4.55
   5   4   7 1204.74   67.93
   5   4   7 1140.28   56.95
   5   4   7 1131.43   57.67
   5   4   8    3.94    5.22
   5   4   8    1.35    2.88
   5   4   8    0.45    2.58
   5   4   9  983.44   61.51
   5   4   9  963.13   52.18
   5   4   9  990.95   54.81
   5   4   9  979.58   50.33
   5   4   9  955.93   49.72
   5   4  10  268.94   25.05
   5   4  10  242.37   25.27
   5   4  10  268.53   23.81
   5   4  10  259.47   23.40
   5   4  11  674.32   42.82
   5   4  11  711.77   46.47
   5   4  11  719.21   41.89
   5   4  12  239.67   23.63
   5   4  12  252.65   27.35
   5   4  12  261.33   25.57
   5   4  12  259.49   24.14
   5   4  13  537.79   37.96
   5   4  13  547.90   42.56
   5   4  13  570.41   39.77
   5   4  13  523.50   36.81
   5   4  14  356.42   34.03
   5   4  14  293.52   27.75
   5   4  14  372.51   31.54
   5   4  14  383.07   30.64
   5   4  15  162.41   19.94
   5   4  15  127.36   19.97
   5   4  15  152.65   19.10
   5   4  16  433.60   34.20
   5   4  16  461.06   38.50
   5   4  16  432.41   33.26
   5   4  17   93.80   15.93
   5   4  17   66.08   12.05
   5   4  18  251.99   23.48
   5   4  18  233.27   24.63
   5   4  19   52.21   10.98
   5   4  19   46.59    9.35
   5   4  20  191.89   17.81
   5   5 -16   13.53    3.69
   5   5  -2 1117.75   62.37
   5   5  -1  443.32   36.62
   5   5   0  551.66   41.45
   5   5   0  508.23   36.03
   5   5   1  544.66   41.61
   5   5   1  525.94   36.67
   5   5   2  245.91   27.34
   5   5   3 1216.60   68.74
   5   5   4  121.44   19.30
   5   5   5  460.91   39.63
   5   5   5  478.48   34.01
   5   5   5  440.11   30.76
   5   5   6   29.63    9.81
   5   5   6   48.29   10.18
   5   5   6   43.07    9.01
   5   5   6   44.37    9.48
   5   5   7 1593.56   83.55
   5   5   7 1515.76   71.70
   5   5   7 1593.91   71.74
   5   5   7 1488.91   70.20
   5   5   8   86.55   16.86
   5   5   8   75.00   11.84
   5   5   8   50.48   10.73
   5   5   8   79.10   14.13
   5   5   8   47.27    9.90
   5   5   9  827.96   56.77
   5   5   9  718.24   45.78
   5   5   9  795.79   48.23
   5   5   9  813.47   45.50
   5   5   9  829.45   45.16
   5   5   9  754.87   44.41
   5   5  10   57.57   13.58
   5   5  10   53.73   10.62
   5   5  10   43.33   10.03
   5   5  10   42.21   10.17
   5   5  10   45.72    9.55
   5   5  11 1042.76   65.65
   5   5  11 1000.30   56.51
   5   5  11  936.81   52.76
   5   5  11 1028.68   59.14
   5   5  11 1034.04   53.87
   5   5  12   80.25   14.28
   5   5  12   49.90   12.14
   5   5  12   73.78   13.31
   5   5  12   66.76   12.17
   5   5  13  382.34   34.83
   5   5  13  290.96   27.72
   5   5  13  421.19   34.01
   5   5  13  395.19   30.66
   5   5  14  185.97   21.65
   5   5  14  208.42   25.96
   5   5  14  205.09   23.41
   5   5  14  219.23   22.64
   5   5  15  256.10   28.78
   5   5  15  254.68   25.52
   5   5  15  218.71   22.87
   5   5  16  178.89   23.79
   5   5  16  175.33   20.77
   5   5  16  197.83   21.27
   5   5  17   73.07   15.16
   5   5  17   65.11   12.30
   5   5  17   70.74   12.38
   5   5  18  205.10   23.76
   5   5  19  125.38   17.08
   5   5  20  354.65   26.61
   5   6 -15  178.26   13.86
   5   6 -14   49.60    8.24
   5   6  -2  541.47   38.50
   5   6  -1  178.87   23.75
   5   6  -1  160.07   19.54
   5   6   0 1059.14   65.76
   5   6   0 1139.09   60.00
   5   6   1  528.85   43.76
   5   6   1  582.68   39.99
   5   6   2  300.90   32.24
   5   6   2  330.27   29.20
   5   6   3  790.47   56.23
   5   6   3  832.92   49.93
   5   6   4  112.69   20.30
   5   6   4  129.30   17.52
   5   6   4   97.48   16.26
   5   6   5  480.87   42.66
   5   6   5  495.93   36.41
   5   6   5  519.71   33.84
   5   6   5  452.91   35.33
   5   6   6    3.01    4.92
   5   6   6    0.58    3.13
   5   6   6    6.58    5.66
   5   6   6    9.49    4.78
   5   6   7  622.23   49.96
   5   6   7  638.69   42.51
   5   6   7  598.97   39.70
   5   6   7  739.18   42.49
   5   6   7  624.77   41.94
   5   6   8  208.15   27.96
   5   6   8  206.83   22.93
   5   6   8  224.95   22.26
   5   6   8  202.44   22.08
   5   6   8  205.00   22.43
   5   6   9  876.43   60.20
   5   6   9  841.42   49.95
   5   6   9  826.00   49.71
   5   6   9  831.35   48.91
   5   6  10   72.20   16.76
   5   6  10   81.75   13.47
   5   6  10   95.12   15.69
   5   6  10   78.80   14.25
   5   6  10   47.77   10.64
   5   6  11  523.06   45.13
   5   6  11  453.29   36.25
   5   6  11  472.10   34.71
   5   6  11  503.35   38.53
   5   6  12    1.61    4.01
   5   6  12    8.17    3.75
   5   6  12    7.34    6.15
   5   6  13  634.11   46.02
   5   6  13  552.28   39.58
   5   6  13  595.10   42.76
   5   6  14   64.69   13.57
   5   6  14   71.74   14.95
   5   6  14   49.27   11.18
   5   6  15  316.63   28.59
   5   6  15  315.76   32.12
   5   6  16   92.33   16.16
   5   6  16   98.18   15.24
   5   6  17  238.37   23.85
   5   6  17  228.58   26.09
   5   6  18  217.82   21.63
   5   6  18  183.68   22.03
   5   6  19  201.35   21.68
   5   6  20  227.33   20.93
   5   7 -13  186.46   15.62
   5   7 -12   88.55   11.93
   5   7 -11  125.84   15.56
   5   7 -10  272.71   24.99
   5   7  -9  102.37   16.05
   5   7  -8  758.97   47.23
   5   7  -7  232.52   24.37
   5   7  -6  695.53   45.81
   5   7  -5   -0.14    3.13
   5   7  -4  715.99   46.65
   5   7  -3    4.90    5.03
   5   7  -2  612.33   42.05
   5   7  -1   10.29    6.19
   5   7   0  545.78   46.49
   5   7   0  575.77   40.71
   5   7   1   29.93   11.40
   5   7   1   28.02    9.55
   5   7   2  130.95   22.81
   5   7   2  123.92   17.96
   5   7   3  157.54   24.92
   5   7   3  208.95   23.59
   5   7   4   13.95    8.80
   5   7   4   22.75    6.89
   5   7   4   12.37    5.40
   5   7   5    8.24    5.82
   5   7   5    9.04    4.05
   5   7   5   13.41    6.92
   5   7   6  443.44   43.49
   5   7   6  475.09   35.43
   5   7   6  490.02   33.88
   5   7   6  458.54   36.08
   5   7   7  713.49   55.88
   5   7   7  745.54   46.42
   5   7   7  735.98   44.28
   5   7   7  555.82   40.26
   5   7   7  740.77   47.46
   5   7   8  173.43   26.71
   5   7   8  164.89   20.68
   5   7   8  109.06   16.33
   5   7   8  162.35   19.76
   5   7   8  167.63   21.20
   5   7   9  584.79   51.26
   5   7   9  643.37   43.77
   5   7   9  620.13   42.26
   5   7   9  667.73   43.02
   5   7   9  602.23   42.93
   5   7  10    8.52    4.34
   5   7  10    2.07    3.15
   5   7  10   -0.75    4.12
   5   7  10   -5.79    4.33
   5   7  11  510.67   38.20
   5   7  11  478.32   37.54
   5   7  11  404.53   33.58
   5   7  11  395.53   33.72
   5   7  12   28.98    8.17
   5   7  12   26.00    8.03
   5   7  12   21.83    7.19
   5   7  13  347.25   32.81
   5   7  13  407.91   33.02
   5   7  13  352.75   31.82
   5   7  14   47.82   11.21
   5   7  14   55.78   13.84
   5   7  14   68.81   13.43
   5   7  15  731.68   50.16
   5   7  15  756.04   47.08
   5   7  16  150.09   20.80
   5   7  16  175.32   20.46
   5   7  17  224.61   22.24
   5   7  17  205.80   23.73
   5   7  18  117.04   15.06
   5   7  18  118.38   16.98
   5   7  19  176.96   17.60
   5   7  19  145.86   17.84
   5   7  20  168.69   17.55
   5   8 -11  185.27   15.96
   5   8 -10  112.40   13.30
   5   8  -9  181.36   18.44
   5   8  -8  352.23   28.39
   5   8  -7   95.48   14.67
   5   8  -6  279.45   26.23
   5   8  -5   11.49    4.82
   5   8  -4  475.13   36.13
   5   8  -3   27.55    8.98
   5   8  -2  329.33   29.91
   5   8  -1   -4.02    4.09
   5   8   0  701.79   46.20
   5   8   1   18.95    7.21
   5   8   2  102.62   16.88
   5   8   3  113.29   15.90
   5   8   3  122.66   17.99
   5   8   4  170.47   20.08
   5   8   4  161.11   21.18
   5   8   5  317.69   28.42
   5   8   5  359.04   32.22
   5   8   6  798.84   47.82
   5   8   6  852.40   51.73
   5   8   7  806.78   48.84
   5   8   7  748.95   48.44
   5   8   7  822.23   52.10
   5   8   8  484.01   36.41
   5   8   8  537.18   36.90
   5   8   8  496.71   38.77
   5   8   9  604.76   41.29
   5   8   9  604.56   40.90
   5   8   9  603.02   42.93
   5   8  10   -1.18    3.20
   5   8  10    5.54    5.76
   5   8  10    5.95    3.80
   5   8  11  391.34   32.42
   5   8  11  359.22   31.83
   5   8  11  364.59   31.93
   5   8  11  371.98   32.55
   5   8  12   38.59    9.98
   5   8  12   38.48   10.07
   5   8  12   53.78   12.86
   5   8  13  872.29   51.60
   5   8  13  755.48   50.24
   5   8  13  817.77   49.92
   5   8  14   55.48   11.74
   5   8  14   67.92   13.10
   5   8  14   56.05   12.50
   5   8  15  415.48   32.66
   5   8  15  393.92   33.69
   5   8  16   57.84   12.44
   5   8  16   48.54   10.47
   5   8  17  405.64   29.96
   5   8  17  394.67   31.56
   5   8  18  162.27   17.08
   5   8  18  169.79   18.98
   5   8  19  197.93   17.74
   5   8  19  180.50   18.36
   5   9  -9  149.43   13.90
   5   9  -8  113.42   13.18
   5   9  -7  246.30   21.36
   5   9  -6  181.74   19.06
   5   9  -5   20.21    6.92
   5   9  -4  451.78   33.33
   5   9  -3    2.23    3.04
   5   9  -2  431.65   33.45
   5   9  -1    1.26    3.31
   5   9   0  352.32   27.56
   5   9   0  351.48   30.36
   5   9   1   18.62    5.21
   5   9   1   16.29    4.86
   5   9   2  481.89   33.32
   5   9   2  427.50   34.92
   5   9   3   94.47   13.98
   5   9   3   88.42   15.14
   5   9   4  993.68   52.86
   5   9   4  985.20   57.03
   5   9   5  111.46   15.63
   5   9   5   85.25   15.10
   5   9   6  729.19   43.92
   5   9   6  700.78   46.59
   5   9   6  705.83   47.38
   5   9   7 1039.68   53.89
   5   9   7  867.88   54.19
   5   9   7  960.73   56.82
   5   9   8  425.09   32.10
   5   9   8  417.18   34.50
   5   9   8  412.19   34.95
   5   9   9  446.84   33.44
   5   9   9  495.80   37.81
   5   9   9  436.29   36.21
   5   9  10  124.72   16.87
   5   9  10  129.48   18.60
   5   9  10  118.26   17.93
   5   9  10  134.49   17.62
   5   9  11  389.34   30.66
   5   9  11  437.81   34.69
   5   9  11  368.90   30.94
   5   9  12   10.02    5.30
   5   9  12   21.02    6.81
   5   9  12   14.60    7.66
   5   9  13  273.27   26.17
   5   9  13  282.18   24.77
   5   9  13  281.50   26.19
   5   9  14   22.37    7.49
   5   9  14   38.13   10.56
   5   9  15  333.02   27.49
   5   9  15  304.53   26.71
   5   9  16   31.87    7.75
   5   9  16   36.18    8.44
   5   9  17  232.96   20.45
   5   9  17  199.98   20.01
   5   9  18   29.78    6.28
   5   9  19  356.99   22.43
   5  10  -7  292.26   18.94
   5  10  -6  117.94   12.41
   5  10  -5  265.15   20.84
   5  10  -4  381.62   26.87
   5  10  -3   32.39    8.91
   5  10  -2  304.41   25.04
   5  10  -1    7.45    4.81
   5  10   0  622.90   34.90
   5  10   0  652.06   40.43
   5  10   1    0.40    2.81
   5  10   1   -0.06    4.30
   5  10   2  327.00   24.03
   5  10   2  300.65   26.92
   5  10   3  125.64   14.49
   5  10   3  121.16   16.60
   5  10   4  447.17   29.58
   5  10   4  444.45   34.08
   5  10   5   34.18    9.07
   5  10   5   40.08    8.58
   5  10   5   35.54    9.00
   5  10   6  371.32   26.83
   5  10   6  336.79   29.71
   5  10   6  374.11   31.11
   5  10   7  242.58   21.38
   5  10   7  288.83   26.89
   5  10   7  258.92   25.47
   5  10   8  346.83   25.65
   5  10   8  345.26   29.87
   5  10   8  311.15   28.37
   5  10   9  357.81   26.25
   5  10   9  366.05   30.66
   5  10   9  330.60   29.05
   5  10  10  163.11   19.75
   5  10  10  164.40   16.97
   5  10  10  169.41   20.12
   5  10  11  386.68   31.25
   5  10  11  391.96   26.96
   5  10  12   75.47   12.83
   5  10  12   66.14   11.22
   5  10  12   86.24   11.69
   5  10  13  292.55   25.28
   5  10  13  280.59   23.17
   5  10  14    3.26    4.27
   5  10  14    6.41    4.83
   5  10  15  214.88   19.80
   5  10  16   19.47    5.59
   5  10  17  337.18   22.34
   5  11  -4  209.59   15.07
   5  11  -3  116.73   11.84
   5  11  -2  288.42   20.67
   5  11  -1   32.69    6.73
   5  11   0  339.62   24.30
   5  11   1   22.88    6.36
   5  11   2  375.61   26.90
   5  11   3    2.54    2.58
   5  11   3    6.95    4.67
   5  11   4  397.57   28.82
   5  11   4  418.63   29.17
   5  11   5    1.57    3.50
   5  11   5   -4.46    2.50
   5  11   6  369.47   27.72
   5  11   6  353.84   27.36
   5  11   7   79.07   12.26
   5  11   7   88.75   12.78
   5  11   8  427.17   30.68
   5  11   8  473.60   31.75
   5  11   9  164.59   17.84
   5  11  10  234.82   21.37
   5  11  11  194.65   18.86
   5  11  12   48.91    9.03
   5  11  13  223.70   19.01
   5  11  14   62.28    9.26
   5  11  15  282.60   19.30
   5  12   0  429.42   22.36
   5  12   1    9.91    3.34
   5  12   2  213.20   15.74
   5  12   2  285.57   18.45
   5  12   3    8.97    3.51
   5  12   3    0.95    2.12
   5  12   4  338.87   22.20
   5  12   4  442.02   25.03
   5  12   5    3.78    1.96
   5  12   5    1.95    2.57
   5  12   6  207.67   16.78
   5  12   7   20.76    4.97
   5  12   8  231.93   17.90
   5  12   9   65.60    8.78
   5  12  10  104.43   11.08
   5  12  11   85.81    9.81
   5  12  12   67.15    8.01
   6  -6  10    4.00    2.71
   6  -5   7  250.93   21.20
   6  -5   8   12.06    4.98
   6  -5   9  292.73   21.99
   6  -5  10   26.43    6.22
   6  -5  11  230.43   17.22
   6  -5  11  247.42   19.91
   6  -5  12   -1.29    2.61
   6  -5  12    4.75    2.62
   6  -5  13  133.98   11.70
   6  -4   2  396.38   30.65
   6  -4   3   38.67    8.83
   6  -4   4  664.15   42.27
   6  -4   5  148.40   18.05
   6  -4   6  279.33   25.82
   6  -4   7  290.05   26.18
   6  -4   8  105.80   15.50
   6  -4   9  287.55   25.21
   6  -4  10   36.96    8.94
   6  -4  11  396.66   28.24
   6  -4  12   32.89    7.16
   6  -4  12   30.89    7.57
   6  -4  13  269.79   20.26
   6  -4  13  301.01   22.66
   6  -4  14    0.43    1.75
   6  -4  14   -3.55    3.63
   6  -3  -1    1.00    4.61
   6  -3   0  700.77   43.62
   6  -3   1  179.18   20.81
   6  -3   2  277.38   26.75
   6  -3   3   20.97    7.22
   6  -3   4  727.51   46.99
   6  -3   5   69.49   13.63
   6  -3   6  269.57   27.18
   6  -3   7  181.86   22.06
   6  -3   8  320.80   29.91
   6  -3   9  152.27   19.80
   6  -3  10  191.53   22.08
   6  -3  11  343.20   29.47
   6  -3  12  124.39   16.20
   6  -3  12  142.76   18.15
   6  -3  13  319.59   25.84
   6  -3  13  362.69   28.56
   6  -3  14   73.93   10.96
   6  -3  14   81.74   11.87
   6  -3  15  346.82   23.46
   6  -3  15  359.26   24.18
   6  -3  16   -0.90    2.37
   6  -3  16   -4.73    2.22
   6  -2  -2  230.57   23.84
   6  -2  -1   10.47    5.64
   6  -2   0 1088.84   58.67
   6  -2   1   61.47   12.31
   6  -2   2  607.71   41.98
   6  -2   3   52.28   11.66
   6  -2   4  753.34   49.05
   6  -2   5  304.94   29.70
   6  -2   6  229.25   25.69
   6  -2   7  183.06   22.78
   6  -2   7  162.05   19.25
   6  -2   8  525.18   40.92
   6  -2   9   94.05   16.75
   6  -2  10  287.54   29.06
   6  -2  11  453.32   36.54
   6  -2  12  208.32   23.29
   6  -2  12  217.69   24.24
   6  -2  13  368.73   30.62
   6  -2  13  383.12   31.95
   6  -2  14   46.30    9.63
   6  -2  14   44.60   10.09
   6  -2  15  345.94   26.41
   6  -2  15  357.72   27.23
   6  -2  16   10.87    3.91
   6  -2  16   12.05    4.18
   6  -2  17  314.90   20.43
   6  -2  17  304.48   20.23
   6  -1  -2  608.55   40.47
   6  -1  -1   52.13   11.03
   6  -1   0  767.60   47.04
   6  -1   1   29.68    9.17
   6  -1   2  961.82   55.23
   6  -1   3   64.90   12.96
   6  -1   4 1139.33   63.07
   6  -1   5    5.13    6.28
   6  -1   6  400.72   34.91
   6  -1   7   63.61   13.20
   6  -1   7   65.63   12.18
   6  -1   8  646.56   45.39
   6  -1   8  478.84   36.70
   6  -1   9   21.57    8.81
   6  -1   9   18.49    7.12
   6  -1  10  376.75   34.49
   6  -1  10  392.62   31.00
   6  -1  11  447.77   37.63
   6  -1  11  449.51   36.36
   6  -1  12  315.28   30.47
   6  -1  12  300.16   28.96
   6  -1  13  210.58   24.05
   6  -1  13  200.51   23.29
   6  -1  14   57.29   11.98
   6  -1  14   64.36   12.60
   6  -1  15  413.95   31.79
   6  -1  15  449.65   33.29
   6  -1  16   53.88   10.23
   6  -1  16   57.86   10.98
   6  -1  17  252.01   20.57
   6  -1  17  284.76   22.00
   6  -1  18   18.03    4.13
   6  -1  18   15.94    4.21
   6   0  -1  165.71   19.76
   6   0   0  925.53   52.60
   6   0   1  175.77   20.80
   6   0   2  576.92   39.95
   6   0   3   78.22   13.98
   6   0   4 1156.57   62.31
   6   0   5    3.68    4.05
   6   0   6  505.01   39.09
   6   0   7   -2.05    5.67
   6   0   7   -8.48    5.29
   6   0   8 1297.40   70.08
   6   0   8 1280.14   67.50
   6   0   9   10.60    7.29
   6   0   9    0.39    3.67
   6   0   9    1.98    2.43
   6   0  10  499.97   40.00
   6   0  10  561.55   38.36
   6   0  11  232.93   24.64
   6   0  11  269.33   28.51
   6   0  11  241.21   25.47
   6   0  12  604.93   39.87
   6   0  12  537.55   41.91
   6   0  12  593.63   42.04
   6   0  13  244.69   26.38
   6   0  13  275.68   27.10
   6   0  14   99.09   16.26
   6   0  14  120.16   17.27
   6   0  15  325.87   28.57
   6   0  15  298.09   27.40
   6   0  16   80.96   12.89
   6   0  16   67.70   11.83
   6   0  17  357.83   26.36
   6   0  17  334.81   26.17
   6   0  18   47.80    8.03
   6   0  18   43.13    8.13
   6   0  19  163.10   13.94
   6   1  -1  392.66   31.40
   6   1   0  536.62   37.59
   6   1   1  842.87   48.97
   6   1   2  917.11   51.74
   6   1   3  311.60   27.80
   6   1   4 1425.26   69.92
   6   1   5   93.24   14.73
   6   1   6  656.04   43.74
   6   1   6  666.45   44.16
   6   1   7   -1.99    5.76
   6   1   7    8.33    5.71
   6   1   8  994.55   57.94
   6   1   8  954.32   57.20
   6   1   8 1061.81   53.96
   6   1   9   90.56   15.74
   6   1   9   78.59   15.08
   6   1   9   88.32   13.79
   6   1  10  843.91   53.62
   6   1  10  852.09   53.27
   6   1  10  882.90   50.27
   6   1  11    8.42    5.16
   6   1  11    0.44    2.22
   6   1  11    1.71    3.56
   6   1  12  430.70   35.41
   6   1  12  511.95   39.36
   6   1  12  494.43   36.71
   6   1  13   36.63    9.77
   6   1  13   58.84   13.24
   6   1  13   53.85   11.96
   6   1  14  295.43   28.25
   6   1  14  248.92   24.76
   6   1  14  286.69   27.44
   6   1  15  457.10   35.16
   6   1  15  452.77   34.73
   6   1  16  205.52   21.38
   6   1  16  225.50   23.00
   6   1  17  258.07   22.90
   6   1  17  268.94   23.92
   6   1  18   56.01    9.60
   6   1  18   64.41   10.10
   6   1  19  315.19   20.40
   6   1  19  348.51   23.19
   6   2   0  592.43   39.94
   6   2   1 1723.58   78.49
   6   2   2  181.43   20.58
   6   2   3  703.61   43.52
   6   2   4  798.10   43.18
   6   2   4  819.71   47.97
   6   2   5  136.33   15.92
   6   2   5  164.65   19.56
   6   2   6  426.90   29.66
   6   2   6  441.51   34.08
   6   2   6  411.86   32.66
   6   2   7   80.07   12.51
   6   2   7   86.32   13.93
   6   2   7   73.58   13.65
   6   2   8  592.65   37.86
   6   2   8  709.39   44.71
   6   2   8  691.79   45.78
   6   2   9    5.85    4.68
   6   2   9    8.65    6.03
   6   2   9   -1.46    3.41
   6   2   9    0.67    3.44
   6   2  10  436.97   34.60
   6   2  10  447.89   36.42
   6   2  10  453.29   32.50
   6   2  11   -0.45    1.83
   6   2  11    8.07    5.22
   6   2  11    3.21    4.38
   6   2  11    9.85    5.48
   6   2  12  363.17   31.65
   6   2  12  376.03   33.79
   6   2  12  363.03   30.15
   6   2  13   36.67   10.10
   6   2  13   33.64    9.97
   6   2  13   24.89    7.73
   6   2  14  103.39   16.63
   6   2  14   86.41   14.69
   6   2  14   91.23   14.71
   6   2  15  347.80   28.99
   6   2  15  305.18   27.08
   6   2  16  356.85   27.60
   6   2  16  325.86   27.22
   6   2  17  316.76   24.97
   6   2  17  326.08   26.78
   6   2  18  100.61   12.23
   6   2  18  101.17   13.37
   6   2  19  268.99   20.96
   6   2  20   41.95    6.98
   6   3   2  234.87   23.42
   6   3   3  503.40   34.43
   6   3   3  554.93   37.74
   6   3   4  288.02   25.11
   6   3   4  304.57   26.68
   6   3   4  287.07   25.81
   6   3   5  359.52   28.24
   6   3   5  393.77   30.98
   6   3   5  367.46   29.90
   6   3   6  658.52   40.74
   6   3   6  735.63   44.37
   6   3   6  709.68   44.53
   6   3   7    6.63    5.07
   6   3   7   17.47    7.48
   6   3   7    9.49    6.58
   6   3   8  827.44   47.54
   6   3   8  889.66   50.59
   6   3   8  879.66   52.62
   6   3   9  142.41   17.53
   6   3   9  137.08   18.28
   6   3   9  133.28   18.78
   6   3  10  353.18   28.92
   6   3  10  344.54   29.51
   6   3  10  355.66   32.81
   6   3  10  359.00   28.19
   6   3  11   11.47    4.94
   6   3  11    9.85    3.94
   6   3  11    3.19    4.01
   6   3  11    6.77    3.25
   6   3  12  652.54   43.95
   6   3  12  901.99   55.13
   6   3  12  671.27   43.77
   6   3  12  902.65   48.37
   6   3  13   58.75   12.07
   6   3  13   74.12   14.45
   6   3  13   81.17   13.48
   6   3  14  545.75   41.10
   6   3  14  504.85   35.17
   6   3  15  197.97   20.27
   6   3  15  171.91   21.92
   6   3  15  212.10   21.93
   6   3  16  326.22   25.69
   6   3  16  330.98   29.72
   6   3  16  361.88   28.67
   6   3  17  128.30   16.92
   6   3  17  153.77   17.57
   6   3  18  159.23   16.97
   6   3  18  142.17   15.89
   6   3  19  248.04   20.37
   6   4   0  156.05   17.20
   6   4   0  119.23   17.05
   6   4   1  882.00   46.40
   6   4   1  815.13   48.98
   6   4   2   12.11    5.17
   6   4   3  663.50   40.22
   6   4   4  909.32   52.16
   6   4   4 1050.82   54.52
   6   4   4  924.47   50.70
   6   4   5  659.14   42.09
   6   4   5  676.44   42.25
   6   4   5  654.06   41.30
   6   4   6  739.01   45.17
   6   4   6  765.69   45.42
   6   4   6  705.10   44.47
   6   4   7   20.58    7.11
   6   4   7   18.58    6.70
   6   4   7   23.88    8.07
   6   4   8  825.61   47.65
   6   4   8  913.61   51.38
   6   4   9   43.25   10.24
   6   4   9   33.61    8.92
   6   4   9   64.79   13.14
   6   4  10  463.33   34.71
   6   4  10  462.67   37.57
   6   4  10  502.03   33.25
   6   4  11   10.42    3.91
   6   4  11   20.32    7.27
   6   4  11    0.48    2.31
   6   4  11   20.77    7.16
   6   4  12 1043.76   63.36
   6   4  12 1064.62   59.05
   6   4  12 1168.29   57.80
   6   4  13   21.30    7.17
   6   4  13   13.67    6.26
   6   4  13   31.36    8.20
   6   4  13   30.99    8.23
   6   4  14  517.09   36.05
   6   4  14  548.67   42.56
   6   4  14  532.57   36.39
   6   4  15   33.57   10.11
   6   4  15   19.76    6.53
   6   4  16  308.06   29.78
   6   4  16  315.36   26.26
   6   4  17   35.62    9.24
   6   4  17   37.03    7.91
   6   4  18  239.82   22.95
   6   4  18  280.31   22.66
   6   4  19   51.87    9.26
   6   5 -15   34.65    5.89
   6   5  -1  817.43   50.39
   6   5   0    7.21    4.32
   6   5   1  805.66   49.75
   6   5   2   79.69   17.08
   6   5   2   88.72   12.72
   6   5   2   82.02   15.23
   6   5   3  421.59   39.90
   6   5   3  473.78   32.13
   6   5   3  362.23   31.71
   6   5   4  350.76   36.49
   6   5   4  355.24   30.97
   6   5   4  365.81   28.62
   6   5   4  336.67   29.59
   6   5   5  513.03   45.22
   6   5   5  491.77   36.81
   6   5   5  454.93   33.36
   6   5   5  472.64   35.18
   6   5   6  409.48   40.05
   6   5   6  355.48   30.85
   6   5   6  339.07   28.84
   6   5   7   34.59   11.76
   6   5   7   50.87   11.07
   6   5   7   51.19   11.04
   6   5   8  237.06   25.17
   6   5   8  242.41   24.81
   6   5   9  559.26   39.76
   6   5   9  526.58   39.42
   6   5  10  480.92   37.01
   6   5  10  451.25   37.09
   6   5  11   63.26   13.32
   6   5  11   68.51   14.51
   6   5  11   84.66   12.81
   6   5  12 1338.93   69.23
   6   5  12 1334.64   64.32
   6   5  12 1274.46   71.27
   6   5  12 1347.69   64.21
   6   5  13    9.48    6.07
   6   5  13   -2.49    4.32
   6   5  13    8.32    5.25
   6   5  13    2.18    2.40
   6   5  14  373.08   30.50
   6   5  14  477.89   38.91
   6   5  14  475.23   36.11
   6   5  14  480.35   33.39
   6   5  15    2.41    3.82
   6   5  15    4.60    3.31
   6   5  16  401.75   34.89
   6   5  16  453.57   31.45
   6   5  17    5.18    3.49
   6   5  18  527.95   36.45
   6   5  19   40.17    8.55
   6   6 -14  171.19   13.31
   6   6 -13   11.77    4.47
   6   6 -12  369.75   26.28
   6   6 -11   64.38   11.10
   6   6  -4   80.57   14.69
   6   6  -3  684.90   45.57
   6   6  -2   50.63   11.60
   6   6  -1  880.39   53.20
   6   6   0   -2.72    5.17
   6   6   0   14.59    6.57
   6   6   1  594.90   49.60
   6   6   1  597.92   42.22
   6   6   2   43.63   12.36
   6   6   2   45.69   11.19
   6   6   3  597.10   49.69
   6   6   3  575.31   41.88
   6   6   4  189.48   27.45
   6   6   4  161.11   20.93
   6   6   4  169.77   18.60
   6   6   4  182.13   22.09
   6   6   5  331.73   36.58
   6   6   5  292.76   28.92
   6   6   5  290.79   26.02
   6   6   5  311.72   28.91
   6   6   6    7.99    6.19
   6   6   6    8.44    5.77
   6   6   6    0.09    2.57
   6   6   6   -0.45    2.71
   6   6   7  217.05   29.58
   6   6   7  205.14   23.63
   6   6   7  184.53   20.60
   6   6   7  128.08   18.10
   6   6   8   99.19   16.43
   6   6   8   92.72   15.10
   6   6   8   77.60   13.34
   6   6   9  561.28   40.79
   6   6   9  553.96   39.58
   6   6   9  469.14   35.29
   6   6  10  292.89   28.56
   6   6  10  267.40   27.21
   6   6  11  184.51   22.45
   6   6  11  184.05   23.10
   6   6  11  183.56   19.98
   6   6  12 1132.09   63.09
   6   6  12 1139.85   58.34
   6   6  12 1131.34   64.46
   6   6  13   25.71    7.98
   6   6  13   22.22    9.34
   6   6  13   11.14    4.81
   6   6  14  433.37   36.35
   6   6  14  450.33   34.71
   6   6  15   12.22    5.95
   6   6  15   17.13    5.60
   6   6  16  551.42   35.24
   6   6  16  509.26   39.32
   6   6  17   10.58    3.02
   6   6  18  291.99   25.87
   6   6  19   13.53    4.72
   6   7 -12  214.12   16.75
   6   7 -11   45.38    8.27
   6   7 -10  416.97   29.37
   6   7  -9   32.31    8.12
   6   7  -8  311.23   27.02
   6   7  -7  156.24   19.79
   6   7  -6  193.05   21.84
   6   7  -5  143.08   19.00
   6   7  -4  180.85   21.73
   6   7  -3  325.06   30.03
   6   7  -2  188.53   22.37
   6   7  -1  579.22   41.79
   6   7   0    4.32    3.01
   6   7   1  389.43   33.68
   6   7   2   84.67   14.78
   6   7   3  421.29   34.96
   6   7   3  401.18   34.42
   6   7   4   24.41    8.03
   6   7   4   24.94    8.60
   6   7   5  962.72   57.00
   6   7   5  919.57   56.02
   6   7   6   13.17    6.03
   6   7   6    6.61    5.97
   6   7   6   15.80    5.65
   6   7   7  253.66   26.61
   6   7   7  256.33   24.42
   6   7   7  181.57   22.58
   6   7   8   52.92   13.00
   6   7   8   84.74   14.22
   6   7   8   58.79   12.34
   6   7   9 1120.83   60.62
   6   7   9 1008.44   55.60
   6   7  10  353.50   32.09
   6   7  10  349.65   30.78
   6   7  10  363.17   28.77
   6   7  10  283.04   27.25
   6   7  11  126.07   18.60
   6   7  11  134.42   17.25
   6   7  11  104.72   16.68
   6   7  12  650.32   43.77
   6   7  12  598.80   42.55
   6   7  12  509.58   36.49
   6   7  13  154.05   20.28
   6   7  13  120.38   16.31
   6   7  13  155.80   20.27
   6   7  14  709.07   46.33
   6   7  14  733.00   45.32
   6   7  15   33.71    9.54
   6   7  15   28.98    7.98
   6   7  16  327.58   25.61
   6   7  16  323.41   29.32
   6   7  17    9.19    5.78
   6   7  17    5.78    3.07
   6   7  18  228.53   21.67
   6   7  19   28.55    6.68
   6   8 -10  366.47   23.57
   6   8  -9   29.35    6.96
   6   8  -8  197.91   19.28
   6   8  -7  133.56   16.38
   6   8  -6  195.56   21.09
   6   8  -5   38.99    9.77
   6   8  -4  353.78   30.07
   6   8  -3  158.69   19.99
   6   8  -2  301.44   28.26
   6   8  -1  388.87   32.90
   6   8   0   86.78   15.22
   6   8   1  402.16   33.73
   6   8   2    7.28    4.05
   6   8   2    2.20    3.15
   6   8   3  800.82   49.63
   6   8   3  795.78   50.89
   6   8   4  206.80   23.46
   6   8   4  211.61   24.16
   6   8   5 1623.35   78.54
   6   8   5 1642.04   80.63
   6   8   6   28.96    9.06
   6   8   6   28.36    8.69
   6   8   7  632.03   43.51
   6   8   7  600.96   43.35
   6   8   8  133.41   18.78
   6   8   8  157.20   18.54
   6   8   8  155.03   18.34
   6   8   8  150.11   20.16
   6   8   9  400.58   33.55
   6   8   9  381.30   31.12
   6   8   9  408.57   31.39
   6   8   9  420.56   34.43
   6   8  10   98.83   14.43
   6   8  10  112.80   17.24
   6   8  10   95.57   15.09
   6   8  10  117.22   17.05
   6   8  11  473.97   35.67
   6   8  11  436.31   33.49
   6   8  12  284.33   26.83
   6   8  12  231.61   22.90
   6   8  13  158.57   20.05
   6   8  13  171.98   18.74
   6   8  13  174.32   20.48
   6   8  14  182.14   21.18
   6   8  14  210.85   20.60
   6   8  14  214.11   22.03
   6   8  15   59.55   11.79
   6   8  15   66.16   10.93
   6   8  16  347.44   25.40
   6   8  16  369.57   29.02
   6   8  17    6.16    4.24
   6   8  17   15.86    5.76
   6   8  18  172.74   16.97
   6   8  19   16.49    5.61
   6   9  -8  365.06   23.15
   6   9  -7   53.39    9.08
   6   9  -6  263.62   21.83
   6   9  -5   80.68   12.26
   6   9  -4  523.56   34.80
   6   9  -3  194.37   20.80
   6   9  -2  376.75   29.80
   6   9  -1  152.86   17.28
   6   9  -1  147.44   18.13
   6   9   0   67.78   11.41
   6   9   0   39.53    9.57
   6   9   1  251.22   23.23
   6   9   1  250.53   25.05
   6   9   2  149.85   17.67
   6   9   2  145.77   18.76
   6   9   3  273.25   25.04
   6   9   3  335.74   29.50
   6   9   4    5.56    3.29
   6   9   4   11.78    5.22
   6   9   5  611.30   40.03
   6   9   5  649.91   43.64
   6   9   6    7.22    4.36
   6   9   6    6.34    5.00
   6   9   7  404.88   31.75
   6   9   7  428.01   31.50
   6   9   7  431.96   34.47
   6   9   8   18.87    6.14
   6   9   8    5.45    4.92
   6   9   8   15.40    6.78
   6   9   9  611.92   39.65
   6   9   9  567.07   37.38
   6   9   9  582.18   40.49
   6   9  10   99.47   14.36
   6   9  10  109.84   15.24
   6   9  10  128.78   15.94
   6   9  10  118.55   16.81
   6   9  11  317.76   26.59
   6   9  11  372.20   28.25
   6   9  12   72.97   11.69
   6   9  12  101.28   14.13
   6   9  12  111.46   14.67
   6   9  13  230.70   21.13
   6   9  13  234.02   21.52
   6   9  13  240.52   22.12
   6   9  14  213.28   19.50
   6   9  14  212.97   20.33
   6   9  15   33.77    7.71
   6   9  15   29.07    6.91
   6   9  16  160.32   15.15
   6   9  16  163.05   16.28
   6   9  17   39.93    7.99
   6   9  17   37.86    6.67
   6  10  -6  364.35   21.62
   6  10  -5   17.46    4.57
   6  10  -4  238.76   16.83
   6  10  -4  294.65   21.30
   6  10  -3   82.61    9.72
   6  10  -3   97.27   12.38
   6  10  -2  267.81   19.68
   6  10  -2  314.37   23.95
   6  10  -1  181.23   16.26
   6  10  -1  196.14   19.19
   6  10   0  142.39   14.57
   6  10   0  156.80   17.37
   6  10   1  227.84   19.29
   6  10   1  259.05   23.03
   6  10   2  188.60   17.61
   6  10   2  157.06   18.30
   6  10   3  571.37   32.46
   6  10   3  313.99   27.65
   6  10   4   25.24    5.97
   6  10   4   26.71    7.43
   6  10   5  369.78   26.46
   6  10   5  381.06   29.90
   6  10   6    4.47    2.69
   6  10   6    5.71    3.43
   6  10   7  455.48   29.62
   6  10   7  366.89   27.55
   6  10   7  454.05   32.78
   6  10   8    9.90    3.89
   6  10   8   21.69    6.24
   6  10   8   27.64    7.71
   6  10   9  562.29   33.96
   6  10   9  593.18   35.52
   6  10   9  570.58   37.34
   6  10  10   19.03    5.54
   6  10  10   24.30    6.26
   6  10  11  403.55   27.62
   6  10  11  382.92   26.04
   6  10  12  117.76   13.58
   6  10  12  110.52   12.63
   6  10  13  191.85   17.45
   6  10  13  207.41   17.36
   6  10  14  103.01   11.77
   6  10  14  105.10   11.82
   6  10  15   96.47   10.56
   6  11  -3   67.91    7.96
   6  11  -2  190.35   15.28
   6  11  -1   91.84   10.73
   6  11   0  158.23   14.90
   6  11   1  247.47   19.52
   6  11   2  107.48   12.80
   6  11   3  155.35   15.68
   6  11   4   65.76   10.21
   6  11   5  379.42   26.30
   6  11   6   34.11    7.43
   6  11   7  284.86   20.46
   6  11   7  327.69   23.93
   6  11   8    8.64    4.01
   6  11   8    4.28    2.96
   6  11   9  163.05   14.69
   6  11  10    3.31    2.56
   6  11  11  126.57   12.20
   6  11  12   41.25    6.50
   6  12   3  218.72   15.24
   6  12   4   91.03    9.59
   6  12   5  246.43   16.86
   7  -5   8  125.65   12.43
   7  -5   9  191.37   14.77
   7  -4   3  338.15   25.87
   7  -4   4   18.57    6.06
   7  -4   5  634.99   37.70
   7  -4   6    6.34    4.34
   7  -4   7  387.68   26.90
   7  -4   8  136.53   14.75
   7  -4   9  231.39   18.91
   7  -4   9  255.49   20.49
   7  -4  10   77.68   10.09
   7  -4  10   72.51   10.01
   7  -4  11  263.58   17.92
   7  -4  11  274.32   19.08
   7  -3   1  247.60   24.18
   7  -3   2  161.95   19.72
   7  -3   3  340.24   29.30
   7  -3   4    1.10    3.16
   7  -3   5  632.09   40.96
   7  -3   5  532.84   35.94
   7  -3   6   -0.47    3.04
   7  -3   6    1.31    2.26
   7  -3   7  416.79   32.08
   7  -3   8   72.23   12.47
   7  -3   9  326.35   26.35
   7  -3   9  322.49   26.04
   7  -3  10   25.58    6.32
   7  -3  10   10.22    3.83
   7  -3  11  203.09   18.62
   7  -3  11  198.78   18.62
   7  -3  12   20.93    5.38
   7  -3  12   26.15    6.49
   7  -3  13  302.09   20.28
   7  -3  13  303.56   20.40
   7  -2   0  358.45   31.11
   7  -2   1  207.21   23.79
   7  -2   2  252.31   26.24
   7  -2   3  187.48   23.03
   7  -2   4    6.51    5.15
   7  -2   5  591.64   42.90
   7  -2   6   92.63   16.01
   7  -2   6   77.66   13.54
   7  -2   7  474.74   36.77
   7  -2   7  362.14   29.62
   7  -2   8    4.64    4.89
   7  -2   8    6.17    2.45
   7  -2   9  486.33   36.54
   7  -2   9  463.91   33.61
   7  -2  10    0.09    5.85
   7  -2  10   -1.33    3.27
   7  -2  11  344.38   28.11
   7  -2  11  309.99   25.98
   7  -2  12   49.15    9.69
   7  -2  12   39.07    8.12
   7  -2  13  312.63   23.85
   7  -2  13  298.79   22.95
   7  -2  14   54.74    8.98
   7  -2  14   51.73    8.45
   7  -2  15  154.33   13.24
   7  -2  15  135.39   12.11
   7  -1   0  445.29   36.44
   7  -1   1  367.51   32.71
   7  -1   2  245.30   26.79
   7  -1   3  101.02   17.14
   7  -1   4  159.19   21.60
   7  -1   5  395.03   35.25
   7  -1   6  294.57   29.83
   7  -1   6  298.09   28.62
   7  -1   7  408.23   35.74
   7  -1   7  371.98   32.10
   7  -1   8   -2.89    4.60
   7  -1   8   -2.04    3.01
   7  -1   8    6.73    5.81
   7  -1   9  722.28   47.86
   7  -1   9  762.06   44.06
   7  -1  10    0.44    6.32
   7  -1  10    4.91    4.94
   7  -1  10   -2.16    3.81
   7  -1  11  310.09   28.62
   7  -1  11  275.73   25.32
   7  -1  12   17.82    5.32
   7  -1  12   19.85    5.55
   7  -1  13  407.64   30.74
   7  -1  13  417.71   29.80
   7  -1  14   24.92    6.70
   7  -1  14   16.15    5.27
   7  -1  15  174.11   16.71
   7  -1  15  210.60   17.49
   7  -1  16   65.51    8.87
   7  -1  16   71.75    8.77
   7   0   0  600.55   43.31
   7   0   1  376.13   33.33
   7   0   2  573.41   42.51
   7   0   3  235.62   26.77
   7   0   4  260.08   27.99
   7   0   5  509.87   40.78
   7   0   6  391.34   35.15
   7   0   6  387.02   34.09
   7   0   7  528.47   41.57
   7   0   7  488.50   38.84
   7   0   8   83.98   15.20
   7   0   8  102.01   16.55
   7   0   9  588.00   43.81
   7   0   9  587.80   41.78
   7   0   9  599.02   38.58
   7   0  10  122.45   17.69
   7   0  10  117.54   18.05
   7   0  10  103.77   14.63
   7   0  11  403.51   33.93
   7   0  11  311.47   27.85
   7   0  11  423.93   31.31
   7   0  12   13.08    5.22
   7   0  12   23.14    6.34
   7   0  12    9.37    3.53
   7   0  13  437.90   33.49
   7   0  13  425.23   31.02
   7   0  14   -2.82    4.74
   7   0  14    5.14    3.36
   7   0  15  316.65   24.92
   7   0  15  300.22   23.40
   7   0  16  104.90   12.43
   7   0  16   98.80   11.71
   7   0  17  291.15   19.15
   7   0  17  272.53   18.34
   7   1   1   79.06   14.70
   7   1   2  824.14   52.33
   7   1   3  195.44   23.60
   7   1   4  571.96   42.17
   7   1   5  419.87   35.90
   7   1   5  429.60   36.23
   7   1   6  445.17   37.08
   7   1   6  440.68   37.17
   7   1   7  393.30   34.91
   7   1   7  359.36   33.60
   7   1   8  504.59   40.25
   7   1   8  518.14   40.80
   7   1   9  460.42   37.75
   7   1   9  445.28   37.33
   7   1  10  257.20   27.53
   7   1  10  272.31   28.20
   7   1  10  308.00   25.87
   7   1  11   25.75    8.44
   7   1  11   24.98    9.05
   7   1  11   23.18    7.33
   7   1  12   37.78   10.45
   7   1  12   25.68    8.15
   7   1  12   26.73    7.43
   7   1  13  412.33   32.70
   7   1  13  427.33   30.38
   7   1  14    9.07    3.02
   7   1  14   13.20    5.15
   7   1  14    7.66    3.90
   7   1  15  353.71   27.16
   7   1  15  335.83   25.52
   7   1  16   35.97    7.61
   7   1  16   29.71    7.07
   7   1  17  345.22   22.46
   7   1  17  327.92   22.11
   7   2   2  635.77   44.00
   7   2   3   90.88   15.71
   7   2   4  527.02   39.11
   7   2   4  475.28   37.52
   7   2   5  229.66   25.02
   7   2   5  232.88   25.85
   7   2   6 1036.07   59.25
   7   2   6  998.01   59.50
   7   2   7  231.65   25.40
   7   2   7  228.18   26.00
   7   2   8  503.47   38.94
   7   2   8  497.42   40.05
   7   2   9  886.66   54.33
   7   2   9  900.77   56.93
   7   2  10  184.55   22.72
   7   2  10  201.46   24.85
   7   2  11  137.43   19.03
   7   2  11  183.17   22.92
   7   2  11  140.70   16.69
   7   2  12   -1.87    3.67
   7   2  12    3.46    6.27
   7   2  12    4.00    3.38
   7   2  13  371.07   30.59
   7   2  13  377.48   32.01
   7   2  13  363.38   27.90
   7   2  14   18.15    6.18
   7   2  14   14.96    5.11
   7   2  14   26.05    6.50
   7   2  15  659.58   38.79
   7   2  15  581.80   37.57
   7   2  15  630.28   36.88
   7   2  16   50.31    9.10
   7   2  16   57.87    9.37
   7   2  16   57.48    9.45
   7   2  17  239.20   18.45
   7   2  17  274.90   20.23
   7   2  18   36.35    6.57
   7   3   1   13.74    5.90
   7   3   2  725.75   43.90
   7   3   3   14.42    6.04
   7   3   3    5.06    4.46
   7   3   3    3.45    3.28
   7   3   4  520.85   38.33
   7   3   4  543.74   38.51
   7   3   5  213.07   21.77
   7   3   5  273.17   26.74
   7   3   5  255.71   26.23
   7   3   6  822.33   48.98
   7   3   6  793.20   49.47
   7   3   7  303.98   28.39
   7   3   7  324.99   30.63
   7   3   8  167.55   19.10
   7   3   8  223.63   24.24
   7   3   8  255.35   27.15
   7   3   9  492.59   35.12
   7   3   9  578.15   40.56
   7   3  10   69.35   11.86
   7   3  10   63.62   12.91
   7   3  10  101.45   17.46
   7   3  11   59.17   10.88
   7   3  11   85.53   14.15
   7   3  11   88.84   16.12
   7   3  12  131.10   17.40
   7   3  12  138.97   20.37
   7   3  12  144.56   17.33
   7   3  13  389.28   30.64
   7   3  13  448.36   36.56
   7   3  13  453.92   30.70
   7   3  14  183.84   19.74
   7   3  14  240.27   25.22
   7   3  14  256.78   21.82
   7   3  15  568.46   34.83
   7   3  15  591.82   39.66
   7   3  15  597.86   35.25
   7   3  16   -0.30    3.24
   7   3  16   -1.48    2.96
   7   3  16    0.60    2.87
   7   3  17  291.73   22.60
   7   3  17  332.27   22.75
   7   3  18   12.19    4.36
   7   4 -14   24.68    5.30
   7   4  -3  189.67   21.71
   7   4  -2  442.77   34.66
   7   4  -1  139.91   16.50
   7   4  -1   87.95   14.66
   7   4   0  601.59   38.55
   7   4   1  110.68   15.50
   7   4   2  955.51   54.54
   7   4   2  992.69   53.68
   7   4   3   -0.91    2.53
   7   4   3    0.50    4.83
   7   4   4  467.45   35.47
   7   4   4  520.79   36.90
   7   4   5   37.37    9.64
   7   4   5   27.86    7.83
   7   4   5   40.96    9.83
   7   4   6  652.32   42.15
   7   4   6  626.54   42.50
   7   4   6  648.97   43.88
   7   4   7   37.66    9.43
   7   4   7   36.33    9.01
   7   4   8   55.29   11.42
   7   4   8   71.65   13.07
   7   4   8   88.38   15.53
   7   4   9  184.48   20.78
   7   4   9  176.79   20.60
   7   4   9  237.94   26.13
   7   4  10   86.52   13.98
   7   4  10   73.58   13.00
   7   4  10   73.36   14.34
   7   4  11   28.73    7.63
   7   4  11   42.58   10.16
   7   4  11   26.37    9.42
   7   4  12  209.17   21.05
   7   4  12  219.01   25.47
   7   4  12  218.70   22.21
   7   4  13  305.90   25.07
   7   4  13  342.64   32.02
   7   4  13  353.29   25.98
   7   4  14  211.04   24.02
   7   4  14  179.78   17.87
   7   4  15  500.23   37.34
   7   4  15  487.40   30.75
   7   4  16   11.20    4.43
   7   4  16   31.69    7.19
   7   4  17  369.27   27.51
   7   4  18   21.51    5.60
   7   5 -13  343.21   21.12
   7   5 -12   42.92    8.12
   7   5 -11  200.40   18.57
   7   5  -5  354.81   30.89
   7   5  -4  471.08   36.10
   7   5  -3  174.68   21.20
   7   5  -2  187.16   22.18
   7   5  -1  222.01   24.45
   7   5   0  338.30   30.44
   7   5   1  300.28   25.18
   7   5   1  193.30   22.74
   7   5   2  840.66   51.38
   7   5   2  939.78   49.10
   7   5   3  101.99   16.36
   7   5   3  148.06   17.88
   7   5   4  562.35   41.19
   7   5   4  608.05   39.69
   7   5   5    2.01    3.86
   7   5   5    7.47    2.52
   7   5   6  514.86   38.43
   7   5   6  492.39   36.74
   7   5   7   56.59   12.15
   7   5   7   51.79   11.71
   7   5   8  321.79   29.52
   7   5   8  308.53   29.10
   7   5   9  138.89   18.66
   7   5   9  137.16   19.26
   7   5  10  364.96   31.27
   7   5  10  392.64   34.04
   7   5  11   34.28    8.96
   7   5  11   51.87   12.46
   7   5  12  246.29   26.74
   7   5  12  269.55   25.62
   7   5  13  266.53   27.90
   7   5  13  288.53   25.89
   7   5  14  211.69   24.06
   7   5  15  372.17   31.98
   7   5  16   77.94   13.54
   7   5  17  416.02   30.14
   7   5  18   67.43   10.28
   7   6 -12   84.33    9.43
   7   6 -11  275.25   20.38
   7   6 -10   19.66    5.41
   7   6  -9  292.59   24.12
   7   6  -8    9.89    5.47
   7   6  -7  389.95   30.48
   7   6  -6   21.73    7.98
   7   6  -5  305.74   27.70
   7   6  -4  141.76   18.84
   7   6  -3  160.73   20.14
   7   6  -2   58.58   12.02
   7   6  -1  192.60   22.58
   7   6   0   71.82   13.81
   7   6   1  196.97   22.85
   7   6   2  539.58   40.17
   7   6   2  422.71   35.22
   7   6   3   31.79    9.48
   7   6   3   25.54    7.96
   7   6   4  271.46   27.55
   7   6   4  254.82   23.63
   7   6   5   60.18   13.24
   7   6   5   51.38   11.06
   7   6   5   78.53   13.57
   7   6   6  960.41   57.23
   7   6   6  950.14   53.22
   7   6   7   34.65   10.47
   7   6   7   39.04    9.95
   7   6   8  438.63   36.03
   7   6   8  459.21   35.30
   7   6   9  174.81   21.68
   7   6   9  167.79   20.84
   7   6  10  768.73   48.79
   7   6  10  718.11   47.22
   7   6  11  168.02   20.73
   7   6  11  150.87   19.94
   7   6  12  299.85   29.01
   7   6  12  330.06   29.00
   7   6  13  236.07   25.12
   7   6  13  240.84   23.90
   7   6  14  274.28   26.91
   7   6  14  287.63   25.31
   7   6  15  246.58   24.54
   7   6  16   60.11   10.96
   7   6  17  279.63   23.62
   7   6  18   56.23    9.49
   7   7 -10   33.51    6.32
   7   7  -9  281.11   21.63
   7   7  -8   35.40    7.73
   7   7  -7  231.63   21.53
   7   7  -6    3.50    3.86
   7   7  -5  364.41   29.53
   7   7  -4   21.12    6.66
   7   7  -3  344.73   29.61
   7   7  -2   19.65    7.87
   7   7  -1  244.01   25.03
   7   7   0  286.19   27.66
   7   7   1   71.87   13.55
   7   7   1   75.89   14.15
   7   7   2  869.18   53.14
   7   7   2  846.81   51.83
   7   7   3  125.48   18.66
   7   7   3  122.13   18.02
   7   7   4  453.04   36.92
   7   7   4  495.72   37.36
   7   7   5    5.67    4.04
   7   7   5    1.41    3.12
   7   7   6  391.05   34.02
   7   7   6  432.31   31.42
   7   7   6  360.27   31.17
   7   7   7   13.59    5.34
   7   7   7   18.98    7.80
   7   7   7   26.97    8.62
   7   7   8  571.92   41.70
   7   7   8  568.60   38.63
   7   7   8  578.22   38.42
   7   7   9   65.04   13.17
   7   7   9   92.85   14.49
   7   7  10  560.17   40.16
   7   7  10  502.37   36.94
   7   7  11   30.90    8.85
   7   7  11    5.47    3.82
   7   7  12  727.44   45.83
   7   7  12  777.59   47.05
   7   7  13  114.24   16.36
   7   7  13  160.76   18.98
   7   7  14  476.42   34.91
   7   7  14  501.95   34.27
   7   7  15  127.10   16.24
   7   7  16  148.65   16.84
   7   7  17  259.62   21.60
   7   7  18   58.25    8.84
   7   8  -9  237.06   16.60
   7   8  -8   14.96    4.49
   7   8  -7  345.53   24.25
   7   8  -6    4.95    3.44
   7   8  -5  465.65   31.52
   7   8  -4    0.50    2.83
   7   8  -3  346.38   28.24
   7   8  -2   22.67    6.51
   7   8  -1  445.11   32.66
   7   8  -1  423.79   32.66
   7   8   0  108.21   15.50
   7   8   0  102.75   15.53
   7   8   1  402.23   31.60
   7   8   1  376.48   31.02
   7   8   2  409.43   32.30
   7   8   2  389.25   31.79
   7   8   3  282.59   26.83
   7   8   3  271.26   26.27
   7   8   4  471.52   35.58
   7   8   4  413.79   33.41
   7   8   5  258.10   25.74
   7   8   5  280.07   26.47
   7   8   6  408.82   33.40
   7   8   6  462.95   34.80
   7   8   7   29.92    8.24
   7   8   7   29.00    8.75
   7   8   8  273.56   26.15
   7   8   8  305.65   24.97
   7   8   9   -3.38    3.85
   7   8   9    3.85    5.01
   7   8   9    9.53    5.67
   7   8  10  742.10   45.23
   7   8  10  640.85   40.22
   7   8  11    1.10    3.73
   7   8  11   -1.22    4.47
   7   8  12  289.93   24.92
   7   8  12  291.62   25.82
   7   8  13   50.10   10.14
   7   8  13   33.31    7.61
   7   8  14  466.73   31.57
   7   8  15   56.91    9.78
   7   8  16  186.34   17.30
   7   8  17  137.96   13.58
   7   9  -7  188.40   14.19
   7   9  -6    7.31    3.07
   7   9  -6    2.03    2.73
   7   9  -5  394.48   24.38
   7   9  -5  466.26   27.53
   7   9  -4    7.35    3.37
   7   9  -4    0.58    2.02
   7   9  -3  353.54   24.41
   7   9  -3  372.28   26.45
   7   9  -2    2.25    2.25
   7   9  -2   15.59    5.67
   7   9  -1  385.09   27.02
   7   9  -1  411.27   29.30
   7   9   0   53.55    9.65
   7   9   0   63.45   11.22
   7   9   1  431.98   29.85
   7   9   1  401.05   30.09
   7   9   2  129.05   15.59
   7   9   2  138.02   16.81
   7   9   3  297.13   24.81
   7   9   3  272.87   24.73
   7   9   4  279.41   24.22
   7   9   4  259.87   24.22
   7   9   5   78.15   12.64
   7   9   5   93.94   14.27
   7   9   6  371.31   28.87
   7   9   6  368.40   29.13
   7   9   7  171.18   19.16
   7   9   7  164.48   18.80
   7   9   8  413.88   30.60
   7   9   8  422.73   30.74
   7   9   9   16.56    6.00
   7   9   9   12.13    5.70
   7   9  10  468.59   32.07
   7   9  10  459.79   29.53
   7   9  11    2.55    2.32
   7   9  11   -1.79    2.63
   7   9  12  312.61   23.89
   7   9  12  260.18   21.11
   7   9  13   12.60    4.81
   7   9  13   15.78    5.06
   7   9  14  263.15   19.91
   7   9  15    8.95    3.41
   7  10  -4    7.40    3.05
   7  10  -3  250.52   16.36
   7  10  -3  327.27   20.63
   7  10  -2    2.05    1.69
   7  10  -2    4.09    3.16
   7  10  -1  258.36   18.08
   7  10  -1  274.71   20.53
   7  10   0    1.19    1.84
   7  10   0    1.38    1.98
   7  10   1  365.35   22.93
   7  10   1  291.48   22.77
   7  10   2   64.88    9.24
   7  10   2   39.36    7.91
   7  10   3  315.00   22.32
   7  10   3  332.75   24.60
   7  10   4   97.90   12.00
   7  10   4   97.63   12.68
   7  10   5  187.98   17.09
   7  10   5  203.44   18.97
   7  10   6  253.10   20.03
   7  10   6  250.91   21.32
   7  10   7  146.16   14.81
   7  10   7  128.08   14.84
   7  10   8  233.59   18.98
   7  10   8  235.22   20.06
   7  10   9   38.20    7.22
   7  10  10  249.65   19.03
   7  10  11   14.34    4.37
   7  10  12  118.44   11.67
   7  11   0    0.03    1.66
   7  11   1  262.95   17.59
   7  11   2   12.52    3.90
   7  11   3  309.41   20.25
   7  11   4   40.88    6.95
   7  11   5  132.52   10.87
   7  11   5  157.88   13.82
   7  11   6   81.73    8.23
   7  11   6   85.71   10.05
   8  -5   0   72.88    8.32
   8  -4   2   44.38    7.52
   8  -4   3  142.67   13.17
   8  -3   3  347.73   25.92
   8  -3   4  174.50   17.08
   8  -3   5  112.82   13.74
   8  -3   5   80.10   10.76
   8  -3   6  224.81   19.27
   8  -3   7   60.22    9.23
   8  -3   8  171.61   15.48
   8  -3   9   31.43    6.42
   8  -3  10  273.82   17.70
   8  -2   4   49.51   10.77
   8  -2   4   56.65   10.86
   8  -2   5  304.19   26.78
   8  -2   5  309.85   25.42
   8  -2   6  168.73   19.17
   8  -2   6  158.21   17.01
   8  -2   7  228.88   21.82
   8  -2   7  195.48   18.14
   8  -2   8  224.50   21.08
   8  -2   9   83.05   12.32
   8  -2  10  336.67   24.00
   8  -2  11   50.53    8.55
   8  -2  12  180.34   14.49
   8  -1   3  521.27   39.65
   8  -1   4   -1.15    5.68
   8  -1   4    3.44    3.80
   8  -1   5  390.03   33.42
   8  -1   5  459.38   34.88
   8  -1   6  123.14   17.68
   8  -1   6  135.22   17.91
   8  -1   7  492.90   36.71
   8  -1   7  504.36   34.77
   8  -1   8  175.26   20.32
   8  -1   8  166.63   18.32
   8  -1   9  175.64   19.47
   8  -1   9  155.79   16.42
   8  -1  10  298.21   25.15
   8  -1  11  231.26   20.80
   8  -1  12  283.05   21.95
   8  -1  13   13.19    4.61
   8   0   3  544.85   41.78
   8   0   4    3.89    4.32
   8   0   4    3.55    5.72
   8   0   5  587.85   43.23
   8   0   5  615.70   43.51
   8   0   6    4.72    4.19
   8   0   6   13.41    5.63
   8   0   7  670.62   45.73
   8   0   7  661.56   44.32
   8   0   8   -0.10    3.99
   8   0   8    7.77    2.80
   8   0   9  287.16   27.37
   8   0   9  266.53   24.64
   8   0  10  201.48   21.82
   8   0  10  215.39   20.65
   8   0  11  421.62   31.20
   8   0  11  397.52   27.43
   8   0  12  195.38   19.17
   8   0  13   25.75    6.48
   8   0  14  303.80   21.13
   8   1   3  384.63   34.46
   8   1   4    5.37    4.68
   8   1   4    2.44    4.32
   8   1   5  569.32   42.60
   8   1   5  561.58   42.25
   8   1   6   33.64   10.46
   8   1   6   38.94   11.25
   8   1   7  900.44   55.52
   8   1   7  973.94   57.35
   8   1   8   -3.86    4.88
   8   1   8   -0.04    5.32
   8   1   9  254.15   25.94
   8   1   9  222.28   24.36
   8   1  10  209.18   23.30
   8   1  10  248.74   24.46
   8   1  11  171.78   19.56
   8   1  11  129.84   16.65
   8   1  12  387.67   29.78
   8   1  12  445.41   30.14
   8   1  13    0.02    2.61
   8   1  13    3.60    3.23
   8   1  14  154.04   15.59
   8   1  15   90.07   10.38
   8   2   2   16.22    6.56
   8   2   3  441.85   35.90
   8   2   4   16.55    7.26
   8   2   4    8.15    5.82
   8   2   5  662.03   46.13
   8   2   5  705.07   47.90
   8   2   6    9.24    6.84
   8   2   6   12.57    7.28
   8   2   7  669.67   45.46
   8   2   7  685.65   47.21
   8   2   8   52.48   11.89
   8   2   8   41.94   10.77
   8   2   9  288.47   27.44
   8   2   9  282.79   28.55
   8   2  10  282.64   26.78
   8   2  10  302.02   28.64
   8   2  11  234.82   23.27
   8   2  11  252.65   25.21
   8   2  12  201.28   20.45
   8   2  12  209.26   21.88
   8   2  13   54.17    9.71
   8   2  13   61.63   11.05
   8   2  14  230.54   19.33
   8   2  14  210.25   18.85
   8   2  15  148.66   13.82
   8   2  15  126.94   12.32
   8   3 -11   40.29    6.76
   8   3 -10  222.85   18.17
   8   3  -9   -5.25    3.31
   8   3  -8  484.24   31.08
   8   3  -7    2.36    3.72
   8   3  -3   45.06    9.10
   8   3  -2  490.44   33.51
   8   3  -2  526.26   35.29
   8   3  -1  323.59   26.38
   8   3  -1  336.84   28.11
   8   3   0  252.19   22.79
   8   3   0  217.91   22.94
   8   3   1  315.83   25.61
   8   3   1  285.84   27.11
   8   3   2  140.98   16.30
   8   3   2  132.54   17.93
   8   3   3  348.43   26.91
   8   3   3  370.74   31.44
   8   3   4  109.09   17.15
   8   3   5  811.81   50.98
   8   3   6    4.81    3.87
   8   3   6   -2.85    4.79
   8   3   7  457.95   36.32
   8   3   7  509.80   39.42
   8   3   8    7.98    5.15
   8   3   8    6.25    5.33
   8   3   9  184.63   21.12
   8   3   9  222.68   24.96
   8   3  10   10.42    4.37
   8   3  10   16.89    7.62
   8   3  11  475.24   33.51
   8   3  11  461.25   36.38
   8   3  12    9.76    4.96
   8   3  12   12.63    6.28
   8   3  13  186.12   17.99
   8   3  13  183.19   20.38
   8   3  14   84.61   10.92
   8   3  14   82.56   12.62
   8   3  15  239.10   17.30
   8   3  15  226.22   19.52
   8   4 -11   78.39    9.15
   8   4 -10  162.91   14.89
   8   4  -9   15.83    4.81
   8   4  -8  448.46   29.47
   8   4  -7    0.15    3.41
   8   4  -6  244.81   22.04
   8   4  -5    2.30    2.22
   8   4  -4  365.99   28.31
   8   4  -1  230.61   23.25
   8   4  -1  251.95   22.63
   8   4   0  184.36   20.69
   8   4   0  265.85   23.69
   8   4   1  172.27   19.83
   8   4   1  226.12   22.08
   8   4   2  127.33   16.87
   8   4   2  228.72   22.63
   8   4   3  201.67   21.52
   8   4   3  295.19   26.38
   8   4   4  203.98   21.39
   8   4   4  285.43   26.26
   8   4   5  423.09   32.19
   8   4   5  561.27   38.97
   8   4   6   21.95    6.35
   8   4   6   41.18   10.74
   8   4   7  393.61   30.42
   8   4   7  545.95   38.96
   8   4   8   68.98   11.42
   8   4   8   79.79   14.81
   8   4   9  268.21   23.71
   8   4   9  338.29   27.81
   8   4   9  374.91   32.05
   8   4  10   12.56    5.76
   8   4  10   25.57    6.70
   8   4  10   21.91    8.58
   8   4  11  461.41   31.69
   8   4  11  453.13   30.09
   8   4  12   -2.58    2.58
   8   4  12    7.37    5.15
   8   4  13  292.25   26.53
   8   4  14  117.81   15.62
   8   4  15  419.14   29.11
   8   4  16   67.25    9.97
   8   5 -10  142.28   12.96
   8   5  -9  121.34   12.92
   8   5  -8  280.65   21.78
   8   5  -7   41.90    8.44
   8   5  -6  332.88   25.81
   8   5  -5    6.08    4.00
   8   5  -4  309.94   26.13
   8   5  -3    6.42    3.70
   8   5  -2  342.23   27.85
   8   5  -1   32.07    8.57
   8   5   0  232.66   23.73
   8   5   1   20.68    6.44
   8   5   1   20.42    6.19
   8   5   2  348.36   29.91
   8   5   2  391.54   29.62
   8   5   3  247.21   24.50
   8   5   3  250.07   23.67
   8   5   4  365.63   30.56
   8   5   4  386.75   30.62
   8   5   5  344.21   29.12
   8   5   5  348.24   29.25
   8   5   6  106.60   15.65
   8   5   6   90.51   14.50
   8   5   7  627.35   40.38
   8   5   7  592.54   40.71
   8   5   8   78.73   13.13
   8   5   8   52.99   11.55
   8   5   9  447.51   32.52
   8   5   9  485.30   36.12
   8   5  10    3.08    2.90
   8   5  10    1.22    3.51
   8   5  11  539.38   38.24
   8   5  11  511.02   33.55
   8   5  12    1.94    2.70
   8   5  12    4.07    3.17
   8   5  13  249.41   24.09
   8   5  14   12.29    4.76
   8   5  15  334.47   25.79
   8   5  16   22.44    5.81
   8   6  -9  164.92   13.91
   8   6  -8  203.13   16.92
   8   6  -7  140.63   14.65
   8   6  -6  228.93   20.17
   8   6  -5   40.30    8.36
   8   6  -4  387.75   28.88
   8   6  -3    2.41    4.12
   8   6  -2  336.75   27.44
   8   6  -1   17.48    6.88
   8   6  -1   18.16    6.45
   8   6   0  312.80   27.92
   8   6   0  322.41   26.80
   8   6   1   75.27   13.33
   8   6   1  116.02   15.24
   8   6   2  258.06   25.31
   8   6   3   71.92   13.26
   8   6   4  399.81   32.78
   8   6   4  461.97   32.02
   8   6   5  152.32   19.21
   8   6   5  164.99   18.44
   8   6   6  131.16   17.79
   8   6   6  132.07   16.79
   8   6   7  405.20   32.25
   8   6   7  394.17   30.78
   8   6   8  108.93   15.40
   8   6   8  100.03   15.03
   8   6   9  551.14   37.00
   8   6   9  505.78   36.03
   8   6  10    2.74    3.16
   8   6  10    5.15    4.56
   8   6  11  551.75   37.05
   8   6  11  529.84   35.12
   8   6  12   33.25    8.12
   8   6  12   25.01    7.83
   8   6  13  313.27   26.00
   8   6  14   15.84    5.99
   8   6  15  264.32   21.93
   8   6  16   11.55    4.57
   8   7  -8  129.30   11.36
   8   7  -8  142.49   12.11
   8   7  -7  110.95   11.54
   8   7  -7  110.36   11.69
   8   7  -6  157.59   15.05
   8   7  -5   38.86    7.80
   8   7  -4  242.17   20.89
   8   7  -4  259.06   21.46
   8   7  -3   35.95    7.72
   8   7  -3   23.36    6.54
   8   7  -2  371.97   28.16
   8   7  -2  373.06   27.89
   8   7  -1   29.06    7.89
   8   7  -1   27.61    7.62
   8   7   0  607.06   38.80
   8   7   0  566.23   36.42
   8   7   1   80.01   12.94
   8   7   1   77.90   12.27
   8   7   2  921.06   49.47
   8   7   2  684.12   42.14
   8   7   3   40.91    9.34
   8   7   3   39.68    8.61
   8   7   4  596.18   39.67
   8   7   4  550.22   35.12
   8   7   5   41.60    9.47
   8   7   6  324.88   28.05
   8   7   6  312.11   24.92
   8   7   7  330.14   28.42
   8   7   7  340.97   26.30
   8   7   8  158.90   18.80
   8   7   8  173.65   18.35
   8   7   9  239.27   22.75
   8   7   9  186.27   19.29
   8   7  10   80.01   12.59
   8   7  10   71.33   11.50
   8   7  11  509.77   33.48
   8   7  11  522.56   34.14
   8   7  12   32.80    7.65
   8   7  12   41.75    9.27
   8   7  13  358.11   26.20
   8   7  14    7.37    3.66
   8   7  15  235.24   18.99
   8   8  -6  112.12   10.60
   8   8  -6  132.26   11.70
   8   8  -5  113.15   11.52
   8   8  -5  115.94   11.69
   8   8  -4  204.34   16.55
   8   8  -4  169.58   15.50
   8   8  -3   36.74    7.45
   8   8  -3   32.79    6.56
   8   8  -2  341.07   24.66
   8   8  -2  343.83   24.52
   8   8  -1    4.61    3.83
   8   8  -1   10.80    3.76
   8   8   0  313.52   24.52
   8   8   0  318.50   24.32
   8   8   1    6.93    3.40
   8   8   1   10.32    4.35
   8   8   2  425.74   30.23
   8   8   2  420.34   29.04
   8   8   3   -1.67    4.96
   8   8   3    0.22    2.65
   8   8   4  575.17   36.50
   8   8   4  540.20   33.71
   8   8   5    7.74    3.75
   8   8   5    8.71    4.33
   8   8   6  196.20   20.02
   8   8   6  179.62   17.31
   8   8   7  136.38   16.52
   8   8   8  272.03   23.67
   8   8   9  208.25   19.95
   8   8   9  163.20   16.18
   8   8  10   66.99   11.26
   8   8  10   65.23    9.84
   8   8  11  286.27   21.83
   8   8  11  310.01   23.68
   8   8  12   13.33    4.31
   8   8  12   13.07    4.71
   8   8  13  296.00   21.02
   8   8  14   10.16    3.65
   8   9  -3  135.09   11.77
   8   9  -3  132.02   11.97
   8   9  -2  232.65   16.73
   8   9  -2  213.63   16.50
   8   9  -1   39.34    6.96
   8   9  -1   42.24    7.45
   8   9   0  372.53   23.88
   8   9   0  366.93   23.88
   8   9   1   27.59    6.30
   8   9   1   29.26    6.38
   8   9   2  288.29   21.17
   8   9   2  242.51   19.49
   8   9   3   18.59    5.65
   8   9   3   14.05    5.20
   8   9   4  331.33   23.56
   8   9   4  294.49   21.92
   8   9   5   18.17    5.27
   8   9   5   23.26    5.98
   8   9   6  328.79   23.70
   8   9   6  285.92   20.90
   8   9   7   37.25    7.65
   8   9   7   48.22    7.93
   8   9   8  232.72   19.30
   8   9   9   67.03    9.75
   8   9  10  143.00   14.38
   8   9  11  174.05   15.30
   8   9  12   53.46    7.94
   8  10   1   64.48    7.52
   8  10   1   58.42    7.44
   8  10   2  297.33   18.05
   8  10   2  283.41   18.27
   8  10   3    0.97    2.19
   8  10   3    4.15    2.13
   8  10   4  397.88   22.46
   8  10   4  379.59   22.13
   8  10   5    2.42    2.04
   8  10   5    6.47    3.10
   8  10   6  178.06   14.17
   8  10   6  173.46   13.53
   8  10   7    6.08    3.18
   8  10   8  172.14   13.49
   8  10   9   56.83    7.21
   9  -3  -2   68.39    9.05
   9  -3  -1   37.92    6.78
   9  -3   0  232.13   17.25
   9  -3   1   -6.17    2.88
   9  -3   2  227.97   16.02
   9  -2   0  210.06   18.82
   9  -2   1   45.27    8.11
   9  -2   2  219.70   18.69
   9  -2   3   10.79    3.83
   9  -2   4  229.82   17.85
   9  -2   5    9.11    3.60
   9  -1   0  219.31   20.89
   9  -1   1  167.55   17.86
   9  -1   2  184.83   18.85
   9  -1   3   59.39   10.31
   9  -1   4  323.55   24.71
   9  -1   5   40.20    8.15
   9  -1   6  296.90   21.82
   9  -1   7    3.32    2.66
   9  -1   8  339.65   20.45
   9   0   0   63.52   11.34
   9   0   1  361.69   28.78
   9   0   2  150.43   17.83
   9   0   3  202.32   21.15
   9   0   4  353.63   28.17
   9   0   5  128.74   16.15
   9   0   6  155.47   17.16
   9   0   7   22.83    6.20
   9   0   8  275.96   21.35
   9   0   9   11.68    4.13
   9   1  -6    5.13    3.11
   9   1  -5  357.19   24.48
   9   1  -2    5.43    2.73
   9   1  -1  279.71   24.57
   9   1   0   51.99   10.41
   9   1   1  369.69   29.68
   9   1   2  182.20   20.22
   9   1   3  191.00   21.16
   9   1   4  194.40   20.84
   9   1   5  147.50   18.10
   9   1   6  153.48   18.18
   9   1   7  139.72   17.01
   9   1   8  274.83   23.54
   9   1   9   11.13    4.93
   9   1  10  307.68   22.43
   9   1  11  163.71   14.33
   9   2  -4    1.51    2.88
   9   2  -3  614.35   35.65
   9   2  -2    6.23    4.31
   9   2  -1  438.39   31.12
   9   2   0   45.21    9.80
   9   2   1  269.68   24.77
   9   2   2  319.23   27.32
   9   2   3  216.69   22.35
   9   2   4  144.79   18.17
   9   2   5  126.07   17.14
   9   2   6  132.27   17.09
   9   2   7  153.79   18.32
   9   2   8  340.34   27.69
   9   2   9   74.88   12.15
   9   2  10  142.23   16.04
   9   2  11    3.04    3.61
   9   2  12  332.68   22.10
   9   3  -2   16.86    5.39
   9   3  -1  285.26   23.21
   9   3   0    1.70    2.27
   9   3   1  360.40   27.83
   9   3   2   67.03   11.90
   9   3   3  221.25   22.10
   9   3   4  126.66   16.66
   9   3   5  236.23   23.44
   9   3   6  174.14   20.01
   9   3   7  230.24   22.85
   9   3   8  326.76   27.52
   9   3   9  164.70   18.62
   9   3  10  237.51   21.94
   9   3  11   54.55    9.77
   9   3  12  360.15   25.06
   9   3  13   18.83    5.00
   9   4  -3  232.97   18.10
   9   4  -2   83.47   10.65
   9   4  -1  266.83   20.40
   9   4   0   18.16    5.17
   9   4   0   16.29    5.42
   9   4   1  377.83   27.10
   9   4   2    6.22    3.92
   9   4   3  334.53   26.52
   9   4   4   68.12   11.71
   9   4   5  226.45   22.09
   9   4   6  110.06   15.18
   9   4   7  182.35   19.88
   9   4   8  271.07   24.30
   9   4   9  212.64   20.99
   9   4  10  257.45   22.87
   9   4  11   80.88   12.28
   9   4  12  355.34   25.42
   9   4  13   33.69    7.09
   9   5  -6  121.58   11.09
   9   5  -5   75.65    9.32
   9   5  -4   82.66   10.37
   9   5  -3  158.94   15.19
   9   5  -2   41.24    7.91
   9   5  -1   99.88   12.44
   9   5   0   16.41    5.21
   9   5   1  291.52   22.74
   9   5   2    2.68    4.18
   9   5   2    0.91    2.47
   9   5   3  321.74   24.18
   9   5   3  348.36   25.21
   9   5   4   30.34    7.29
   9   5   4   13.76    5.53
   9   5   5  327.48   24.06
   9   5   5  342.12   26.06
   9   5   6   77.99   10.74
   9   5   6   87.07   12.53
   9   5   7  257.72   20.41
   9   5   7  298.14   24.22
   9   5   8  187.78   18.94
   9   5   8  192.86   16.79
   9   5   9  277.36   23.26
   9   5   9  251.71   18.86
   9   5  10  219.69   20.39
   9   5  10  232.32   16.95
   9   5  11  102.74   13.19
   9   5  12  239.51   19.96
   9   5  13  105.02   12.08
   9   6  -5   44.00    6.66
   9   6  -4   96.86   10.69
   9   6  -3  162.36   14.82
   9   6  -2   24.84    5.95
   9   6  -1  376.95   25.61
   9   6   0   11.16    4.50
   9   6   1  428.12   28.32
   9   6   2    3.02    3.57
   9   6   3  378.72   26.61
   9   6   4   24.27    6.05
   9   6   4   29.58    7.13
   9   6   5  396.53   27.27
   9   6   5  406.68   26.56
   9   6   6   17.39    4.85
   9   6   6   25.12    5.68
   9   6   7  350.59   24.89
   9   6   7  376.18   25.94
   9   6   8  159.39   15.44
   9   6   8  159.55   16.28
   9   6   9  461.90   29.21
   9   6   9  437.91   26.79
   9   6  10   88.90   11.84
   9   6  10   81.55   10.11
   9   6  11  272.66   20.91
   9   6  12  152.91   14.68
   9   6  13   91.51   10.64
   9   7  -4  153.70   12.35
   9   7  -3  147.18   12.94
   9   7  -2   65.66    8.79
   9   7  -1  257.65   19.32
   9   7   0  120.71   13.11
   9   7   1  435.51   27.50
   9   7   2  177.52   16.71
   9   7   3  269.73   21.18
   9   7   4    6.37    2.53
   9   7   5  414.06   27.33
   9   7   6    3.90    2.77
   9   7   7  362.60   24.59
   9   7   7  357.02   22.55
   9   7   8   28.84    6.42
   9   7   8   37.25    6.53
   9   7   9  244.07   18.36
   9   7   9  253.60   18.96
   9   7  10   61.07    8.39
   9   7  10   73.70    9.59
   9   7  11  129.29   12.29
   9   8  -1  157.29   12.81
   9   8   0   98.67   10.38
   9   8   1  227.47   16.98
   9   8   2  185.25   15.37
   9   8   3  223.82   17.49
   9   8   4   90.91   10.90
   9   8   5  333.82   22.30
   9   8   6   20.04    5.14
   9   8   7  359.19   22.95
   9   8   8    2.98    2.46
   9   8   9  249.47   17.50
   9   8  10   13.43    3.76
   9   9   5  371.45   20.60
  10   0  -1    9.99    3.68
  10   0   0  196.64   15.45
  10   0   1   -2.22    2.19
  10   0   2  326.59   20.79
  10   0   3   11.19    3.84
  10   0   4  311.54   19.44
  10   1  -2  177.66   13.96
  10   1  -1    4.42    2.06
  10   1   0  185.39   15.52
  10   1   1    0.75    2.07
  10   1   2  303.71   21.39
  10   1   3    7.66    3.61
  10   1   4  308.56   21.16
  10   1   5   33.78    6.40
  10   1   6  196.22   15.25
  10   2  -1   12.86    4.25
  10   2   0  203.43   16.16
  10   2   1    0.21    2.85
  10   2   2  278.70   20.50
  10   2   3   10.65    4.44
  10   2   4  207.25   17.47
  10   2   5   10.70    3.88
  10   2   6  303.20   21.03
  10   2   7   27.90    5.25
  10   3   0  178.42   14.15
  10   3   1   32.01    6.38
  10   3   2  241.31   18.21
  10   3   3   17.01    5.14
  10   3   4  228.97   18.12
  10   3   5   -0.57    2.31
  10   3   6  302.79   21.31
  10   3   7   11.14    3.76
  10   3   8  247.24   17.78
  10   4   2  257.70   17.27
  10   4   3   60.30    8.31
  10   4   4  245.69   17.94
  10   4   5    0.72    2.17
  10   4   6  299.31   20.36
  10   4   7    2.40    1.73
  10   4   8  244.87   17.54
   0   0   0    0.00    0.00


TITL A23061302A0229 in P1
REM P1 (#1 in standard setting)
CELL 1.54184   8.361541  10.697974  19.255964  76.1363  84.4874  77.0484
ZERR   23.00   0.000301   0.000460   0.000731   0.0035   0.0030   0.0034
LATT -1
SFAC C H N F Ir
UNIT 23.00 23.00 23.00 23.00 23.00
TREF
HKLF 4
END
_computing_structure_solution     'SHELXT 2018/2 (Sheldrick, 2018)'
;
_shelx_hkl_checksum                78164
_shelx_fab_file
;
-10 -5 1 0.1301 -0.6597
-10 -4 1 0.8790 0.2862
-10 -4 2 -1.5111 -0.1656
-10 -4 3 1.5771 -0.2557
-10 -3 1 0.9633 0.3857
-10 -3 2 -1.4236 -0.0647
-10 -3 3 1.2356 -0.5524
-10 -2 1 0.9921 -0.0192
-10 -2 2 -0.9023 0.2516
-10 -2 3 0.4415 -0.7837
-10 -2 4 -0.0394 0.8670
-10 -1 1 1.1460 0.3869
-10 -1 2 -0.4122 -0.3571
-10 -1 3 -0.2876 -0.1062
-10 0 1 0.7518 0.9464
-10 0 2 0.1318 -1.0633
-9 -8 1 0.7792 -0.1717
-9 -7 1 1.2139 -0.3859
-9 -7 2 -0.5543 0.4582
-9 -7 3 0.5004 -0.1394
-9 -7 4 -0.7373 -0.3194
-9 -6 1 0.6426 -0.6271
-9 -6 2 0.0914 0.5203
-9 -6 3 0.0088 -0.0501
-9 -6 4 -0.1715 -0.4273
-9 -6 5 -0.4358 0.5165
-9 -6 6 1.1154 -0.1807
-9 -5 1 -0.0124 -0.6344
-9 -5 2 0.0694 0.5637
-9 -5 3 0.6321 -0.2971
-9 -5 4 -0.7230 0.0695
-9 -5 5 -0.4202 0.0104
-9 -5 6 1.4565 0.1618
-9 -5 7 -1.0807 -0.5103
-9 -4 1 0.5782 -0.0881
-9 -4 2 -1.3722 0.0482
-9 -4 3 2.4339 -0.1036
-9 -4 4 -2.1331 0.2087
-9 -4 5 0.2453 -0.1399
-9 -4 6 1.4432 0.0796
-9 -4 7 -1.4315 -0.2123
-9 -4 8 0.3154 0.1844
-9 -3 1 1.2213 0.2573
-9 -3 2 -2.0701 -0.3262
-9 -3 3 2.7210 0.0795
-9 -3 4 -1.9897 0.1909
-9 -3 5 0.0406 -0.0709
-9 -3 6 1.6121 -0.1777
-9 -3 7 -1.7422 0.1808
-9 -3 8 0.6694 -0.1818
-9 -3 9 0.2922 0.3576
-9 -2 1 1.2202 0.0291
-9 -2 2 -1.2926 -0.0721
-9 -2 3 1.0931 -0.2215
-9 -2 4 -0.3703 0.4787
-9 -2 5 -0.5829 -0.3096
-9 -2 6 1.3204 -0.0098
-9 -2 7 -1.3815 0.1032
-9 -2 8 0.6247 -0.1368
-9 -2 9 0.2710 0.2547
-9 -1 1 1.4007 0.0854
-9 -1 2 -0.5294 -0.0993
-9 -1 3 -0.4213 -0.1294
-9 -1 4 0.8518 0.3356
-9 -1 5 -0.5636 -0.2965
-9 -1 6 0.3606 0.1753
-9 -1 7 -0.5771 -0.1456
-9 -1 8 0.5009 0.0730
-9 -1 9 0.0117 0.0912
-9 0 1 1.0453 0.3743
-9 0 2 0.1396 -0.4581
-9 0 3 -1.2691 0.3753
-9 0 4 1.3905 -0.2337
-9 0 5 -0.3594 0.0942
-9 0 6 -0.3287 0.0527
-9 0 7 -0.0808 -0.1596
-9 0 8 0.4764 0.1223
-9 0 9 -0.1667 0.0191
-9 1 1 -0.4211 0.2969
-9 1 2 1.0507 -0.3462
-9 1 3 -1.7721 0.2478
-9 1 4 1.7386 -0.1799
-9 1 5 -0.6271 0.1583
-9 1 6 -0.1833 -0.1532
-9 1 7 -0.1004 0.1729
-9 1 8 0.4264 -0.2343
-9 1 9 -0.0866 0.3117
-9 2 1 -1.4199 0.5029
-9 2 2 1.3566 -0.1589
-9 2 3 -1.6644 -0.3173
-9 2 4 1.7690 0.3983
-9 2 5 -1.0569 -0.0468
-9 2 6 0.3206 -0.4158
-9 2 7 -0.2402 0.6830
-9 3 1 -1.2143 1.0778
-9 3 2 0.9203 -0.3426
-9 3 3 -1.0031 -0.4710
-9 3 4 1.2473 0.5682
-9 3 5 -0.9777 0.0603
-9 3 6 0.4161 -0.7504
-8 -9 1 1.3099 0.5934
-8 -9 2 -0.9417 -0.3939
-8 -9 3 0.2302 -0.1026
-8 -8 1 1.1790 0.3408
-8 -8 2 -0.7602 -0.2165
-8 -8 3 0.1002 -0.1877
-8 -8 4 0.0384 0.3040
-8 -8 5 0.2674 -0.3404
-8 -8 6 -0.2491 0.5678
-8 -7 1 1.1775 0.0628
-8 -7 2 -1.0780 -0.0707
-8 -7 3 0.4767 -0.0660
-8 -7 4 -0.1892 0.0714
-8 -7 5 0.2043 -0.1913
-8 -7 6 -0.0769 0.5766
-8 -7 7 -0.1040 -0.8769
-8 -7 8 -0.0146 0.7916
-8 -6 1 1.6191 0.0336
-8 -6 2 -1.1926 -0.0262
-8 -6 3 0.1897 0.1127
-8 -6 4 0.5065 -0.3079
-8 -6 5 -0.9023 0.3295
-8 -6 6 1.0850 -0.0412
-8 -6 7 -0.6549 -0.3269
-8 -6 8 -0.4221 0.4560
-8 -6 9 1.3703 -0.2930
-8 -5 1 1.3075 -0.0251
-8 -5 2 -0.3064 0.1349
-8 -5 3 -0.7064 -0.0018
-8 -5 4 1.1828 -0.2194
-8 -5 5 -1.5957 0.3008
-8 -5 6 1.9319 -0.1438
-8 -5 7 -1.3442 -0.1637
-8 -5 8 -0.3028 0.3282
-8 -5 9 1.8331 -0.1773
-8 -5 10 -2.1517 0.0615
-8 -5 11 1.3843 -0.3901
-8 -4 1 0.5108 -0.1240
-8 -4 2 0.1121 0.1868
-8 -4 3 -0.2059 -0.0499
-8 -4 4 -0.0796 -0.0332
-8 -4 5 -0.3383 -0.0016
-8 -4 6 1.4198 0.1174
-8 -4 7 -1.7616 -0.2929
-8 -4 8 0.6217 0.3067
-8 -4 9 0.9858 -0.0044
-8 -4 10 -1.6113 -0.1827
-8 -4 11 1.0134 -0.1904
-8 -3 1 0.0147 -0.1327
-8 -3 2 -0.1980 0.0190
-8 -3 3 0.8053 0.1680
-8 -3 4 -1.3289 -0.1648
-8 -3 5 0.6543 0.0677
-8 -3 6 1.0748 -0.0078
-8 -3 7 -2.3040 -0.0519
-8 -3 8 1.8340 0.0003
-8 -3 9 -0.2030 0.2443
-8 -3 10 -0.9968 -0.2705
-8 -3 11 0.9465 -0.2498
-8 -3 12 -0.2349 0.7582
-8 -2 1 -0.3696 -0.1650
-8 -2 2 0.2266 0.0269
-8 -2 3 -0.0331 0.1075
-8 -2 4 -0.0316 -0.0942
-8 -2 5 -0.5193 0.0649
-8 -2 6 1.5830 -0.0892
-8 -2 7 -2.3643 0.0800
-8 -2 8 1.9406 -0.1024
-8 -2 9 -0.3358 0.2195
-8 -2 10 -1.1381 -0.1375
-8 -2 11 1.3073 -0.3228
-8 -2 12 -0.4996 0.6773
-8 -2 13 -0.1547 -0.4504
-8 -1 1 -0.2287 -0.0925
-8 -1 2 0.8969 0.1430
-8 -1 3 -1.6133 -0.1575
-8 -1 4 2.0574 0.1228
-8 -1 5 -1.9744 -0.0529
-8 -1 6 1.5157 0.0456
-8 -1 7 -1.1921 -0.1365
-8 -1 8 0.8030 0.1612
-8 -1 9 0.2030 -0.0201
-8 -1 10 -1.2457 -0.0741
-8 -1 11 1.1798 -0.0448
-8 -1 12 -0.1564 0.1389
-8 -1 13 -0.5912 0.0248
-8 0 1 0.1277 0.0549
-8 0 2 1.1379 0.1451
-8 0 3 -2.2028 -0.1685
-8 0 4 2.7580 -0.0292
-8 0 5 -2.1569 0.1963
-8 0 6 0.7162 -0.1050
-8 0 7 0.1111 -0.1484
-8 0 8 -0.0209 0.2709
-8 0 9 0.1355 -0.1425
-8 0 10 -0.6368 -0.0610
-8 0 11 0.5115 0.1301
-8 0 12 0.3094 -0.0689
-8 0 13 -0.7272 -0.0069
-8 1 1 -0.7129 -0.0749
-8 1 2 1.7425 0.2157
-8 1 3 -2.2419 -0.1518
-8 1 4 2.4880 -0.1240
-8 1 5 -1.8263 0.3240
-8 1 6 0.4133 -0.2612
-8 1 7 0.2018 0.0663
-8 1 8 0.3436 0.0462
-8 1 9 -0.6577 -0.0045
-8 1 10 0.2455 -0.1186
-8 1 11 -0.1055 0.1655
-8 1 12 0.4923 -0.0201
-8 1 13 -0.4995 -0.2354
-8 2 1 -1.8176 -0.0297
-8 2 2 2.1800 0.0352
-8 2 3 -1.9194 -0.1169
-8 2 4 1.8691 0.1509
-8 2 5 -1.5264 -0.0890
-8 2 6 0.7010 -0.0583
-8 2 7 -0.4580 0.2177
-8 2 8 1.0181 -0.2712
-8 2 9 -1.1839 0.2483
-8 2 10 0.6248 -0.3136
-8 2 11 -0.3407 0.4385
-8 2 12 0.5643 -0.3950
-8 3 1 -1.5190 0.4396
-8 3 2 1.7198 -0.4985
-8 3 3 -1.3006 0.1539
-8 3 4 1.1414 0.2795
-8 3 5 -1.0178 -0.3549
-8 3 6 0.6173 -0.0225
-8 3 7 -0.5020 0.4464
-8 3 8 0.8025 -0.4823
-8 3 9 -0.7442 0.2635
-8 3 10 0.2303 -0.2669
-8 3 11 -0.0924 0.5534
-8 4 1 -0.8058 0.1994
-8 4 2 1.4257 -0.3939
-8 4 3 -1.1399 0.2038
-8 4 4 0.6362 0.1402
-8 4 5 -0.2284 -0.1295
-8 4 6 -0.1543 -0.3317
-8 4 7 0.2652 0.6983
-8 4 8 -0.0424 -0.4964
-8 4 9 -0.0162 0.0344
-8 4 10 -0.2267 0.0523
-8 5 1 -0.6623 -0.7751
-8 5 2 1.5152 0.3266
-8 5 3 -1.1348 -0.0387
-8 5 4 0.2034 0.0472
-8 5 5 0.4483 -0.0178
-8 5 6 -0.7262 -0.2603
-8 5 7 0.6821 0.4661
-8 5 8 -0.3236 -0.2735
-7 -10 1 0.8823 0.2393
-7 -10 2 -1.2604 0.0532
-7 -10 3 0.6669 -0.6850
-7 -10 4 0.2025 0.8113
-7 -9 1 1.5862 0.5860
-7 -9 2 -1.2831 -0.4057
-7 -9 3 0.2630 -0.2599
-7 -9 4 0.6705 0.5728
-7 -9 5 -0.7333 -0.2404
-7 -9 6 0.1711 -0.2370
-7 -9 7 0.0544 0.5989
-7 -8 1 0.9100 0.3529
-7 -8 2 -0.4641 -0.4319
-7 -8 3 -0.2282 0.0618
-7 -8 4 0.8593 0.2471
-7 -8 5 -0.9354 -0.2263
-7 -8 6 0.4759 0.1016
-7 -8 7 -0.0669 0.0931
-7 -8 8 0.1368 -0.4791
-7 -8 9 -0.4342 0.7722
-7 -7 1 -0.9650 -0.0095
-7 -7 2 0.3793 -0.2427
-7 -7 3 -0.1329 0.1884
-7 -7 4 0.4506 0.0247
-7 -7 5 -0.7821 -0.2348
-7 -7 6 0.5503 0.4566
-7 -7 7 0.2022 -0.5745
-7 -7 8 -0.7952 0.4477
-7 -7 9 0.7019 -0.2441
-7 -7 10 -0.2113 0.1869
-7 -6 1 -1.1416 -0.0295
-7 -6 2 -0.0804 -0.1506
-7 -6 3 0.2892 0.1837
-7 -6 4 0.4416 -0.0766
-7 -6 5 -1.1506 -0.0623
-7 -6 6 0.9732 0.1817
-7 -6 7 0.2252 -0.2494
-7 -6 8 -1.5931 0.2443
-7 -6 9 2.0578 -0.2116
-7 -6 10 -1.5395 0.2253
-7 -6 11 0.8476 -0.2920
-7 -6 12 -0.4374 0.3470
-7 -5 1 0.4844 0.0003
-7 -5 2 -0.5217 -0.0463
-7 -5 3 -0.5978 0.0576
-7 -5 4 1.8365 -0.0212
-7 -5 5 -2.2241 0.0359
-7 -5 6 1.6170 -0.1635
-7 -5 7 -0.2567 0.2970
-7 -5 8 -1.2888 -0.3246
-7 -5 9 2.2025 0.2780
-7 -5 10 -2.1419 -0.1535
-7 -5 11 1.4997 -0.1614
-7 -5 12 -0.7036 0.5779
-7 -5 13 -0.1327 -0.7390
-7 -4 1 0.2954 -0.1043
-7 -4 2 0.9609 0.0557
-7 -4 3 -2.4969 -0.0072
-7 -4 4 2.8107 0.0527
-7 -4 5 -1.8271 -0.1029
-7 -4 6 0.7637 0.0270
-7 -4 7 -0.2230 0.0778
-7 -4 8 -0.1911 -0.0949
-7 -4 9 0.7718 0.1093
-7 -4 10 -1.2245 -0.1077
-7 -4 11 1.1572 -0.1123
-7 -4 12 -0.5145 0.4384
-7 -4 13 -0.3819 -0.4026
-7 -4 14 0.9702 -0.0699
-7 -3 1 -2.4865 -0.1240
-7 -3 2 3.1878 0.0141
-7 -3 3 -3.3235 0.1080
-7 -3 4 1.8761 -0.0509
-7 -3 5 0.1848 -0.1014
-7 -3 6 -0.9420 0.1495
-7 -3 7 0.0276 -0.1324
-7 -3 8 1.1069 0.1420
-7 -3 9 -1.1018 -0.0989
-7 -3 10 0.1104 0.0411
-7 -3 11 0.7178 -0.1709
-7 -3 12 -0.6648 0.3592
-7 -3 13 0.0430 -0.2075
-7 -3 14 0.3958 -0.2113
-7 -3 15 -0.3096 0.3501
-7 -2 1 -4.6588 -0.1052
-7 -2 2 4.0148 0.0040
-7 -2 3 -2.9084 0.1216
-7 -2 4 1.0077 -0.1023
-7 -2 5 0.5894 0.0228
-7 -2 6 -0.6063 -0.0361
-7 -2 7 -0.7847 0.0801
-7 -2 8 2.0728 -0.0639
-7 -2 9 -1.8911 0.0469
-7 -2 10 0.3776 -0.0120
-7 -2 11 1.0325 -0.1537
-7 -2 12 -1.2459 0.3170
-7 -2 13 0.5587 -0.2173
-7 -2 14 0.0419 -0.0278
-7 -2 15 -0.0938 0.0662
-7 -1 1 -3.7958 -0.1088
-7 -1 2 2.7930 0.0741
-7 -1 3 -1.9658 -0.0414
-7 -1 4 1.2867 0.0373
-7 -1 5 -1.1203 -0.0050
-7 -1 6 1.4031 -0.0629
-7 -1 7 -1.7751 0.0782
-7 -1 8 1.8864 -0.0301
-7 -1 9 -1.2614 0.0137
-7 -1 10 -0.1325 -0.0388
-7 -1 11 1.2829 0.0322
-7 -1 12 -1.1459 -0.0299
-7 -1 13 0.0300 0.1143
-7 -1 14 0.8405 -0.2187
-7 -1 15 -0.8347 0.2524
-7 0 1 -0.9375 0.0269
-7 0 2 0.6136 0.0264
-7 0 3 -0.7224 -0.0869
-7 0 4 1.3736 0.0620
-7 0 5 -2.2367 0.0186
-7 0 6 2.2435 -0.0299
-7 0 7 -1.3402 -0.0621
-7 0 8 0.6185 0.1436
-7 0 9 -0.3314 -0.1124
-7 0 10 -0.1839 -0.0102
-7 0 11 0.7023 0.1401
-7 0 12 -0.2643 -0.2053
-7 0 13 -0.9750 0.1693
-7 0 14 1.7110 -0.0781
-7 0 15 -1.2973 0.0588
-7 1 1 0.5927 0.0512
-7 1 2 -0.1342 0.0356
-7 1 3 -0.2902 -0.0653
-7 1 4 1.0933 -0.0110
-7 1 5 -1.8625 0.0844
-7 1 6 1.3335 -0.0476
-7 1 7 0.0710 -0.0276
-7 1 8 -0.5229 0.0357
-7 1 9 -0.1485 -0.0130
-7 1 10 0.4509 0.0178
-7 1 11 -0.1308 -0.0364
-7 1 12 0.3925 0.1089
-7 1 13 -1.3587 -0.3012
-7 1 14 1.6872 0.4992
-7 1 15 -0.8217 -0.5039
-7 2 1 -0.2108 -0.2108
-7 2 2 0.7931 0.1381
-7 2 3 -0.7369 -0.0160
-7 2 4 0.7768 -0.0298
-7 2 5 -0.8059 -0.0589
-7 2 6 -0.0694 0.1663
-7 2 7 1.1358 -0.1149
-7 2 8 -0.7466 -0.0266
-7 2 9 -0.6452 0.0150
-7 2 10 1.0822 0.1415
-7 2 11 -0.4641 -0.2069
-7 2 12 0.4489 0.1563
-7 2 13 -1.2799 -0.1583
-7 2 14 1.4246 0.1932
-7 2 15 -0.3713 -0.1321
-7 3 1 -0.6924 -0.2975
-7 3 2 0.9630 -0.0029
-7 3 3 -0.6049 0.2509
-7 3 4 0.2060 -0.1878
-7 3 5 0.1855 -0.1268
-7 3 6 -0.9772 0.3424
-7 3 7 1.4252 -0.2330
-7 3 8 -0.4856 0.0434
-7 3 9 -0.9210 -0.1030
-7 3 10 0.9985 0.2399
-7 3 11 -0.0991 -0.0598
-7 3 12 0.1028 -0.3801
-7 3 13 -1.1160 0.7090
-7 3 14 1.3952 -0.8199
-7 3 15 -0.4424 0.8092
-7 4 1 0.2563 -0.2767
-7 4 2 0.1242 0.0136
-7 4 3 -0.2606 0.2866
-7 4 4 0.0687 -0.3262
-7 4 5 0.4201 0.0814
-7 4 6 -1.1277 0.1172
-7 4 7 1.3573 -0.0346
-7 4 8 -0.5290 -0.0967
-7 4 9 -0.4856 0.0258
-7 4 10 0.3825 -0.0050
-7 4 11 0.3589 0.3532
-7 4 12 -0.1585 -0.8401
-7 4 13 -0.9313 1.0405
-7 4 14 1.3014 -0.9444
-7 5 1 0.9500 -0.5020
-7 5 2 -0.1587 0.5260
-7 5 3 -0.4376 -0.1671
-7 5 4 0.2799 -0.2173
-7 5 5 0.3857 0.2450
-7 5 6 -1.0539 -0.0545
-7 5 7 1.2187 0.0164
-7 5 8 -0.6205 -0.1409
-7 5 9 -0.2091 0.2627
-7 5 10 0.3873 -0.4591
-7 5 11 -0.0384 0.7646
-7 5 12 0.1470 -0.8708
-7 6 1 0.8214 -0.3391
-7 6 2 -0.2091 0.6343
-7 6 3 -0.0140 -0.2910
-7 6 4 -0.4526 -0.2360
-7 6 5 0.9813 0.2231
-7 6 6 -1.0538 0.2553
-7 6 7 0.7362 -0.5398
-7 6 8 -0.1395 0.3522
-7 6 9 -0.5967 0.0845
-7 6 10 0.9722 -0.5235
-7 6 11 -0.7386 0.7505
-7 7 1 0.3703 0.3184
-7 7 2 -0.4936 0.1481
-7 7 3 0.9565 0.0416
-7 7 4 -1.5119 -0.4087
-7 7 5 1.4730 0.1525
-7 7 6 -0.7657 0.5789
-7 7 7 0.0840 -0.9813
-6 -11 1 0.3942 -0.0069
-6 -11 2 -1.0428 0.2469
-6 -11 3 0.8378 -0.9776
-6 -10 1 0.7525 0.1952
-6 -10 2 -1.1172 0.1426
-6 -10 3 0.3955 -0.8996
-6 -10 4 0.5294 1.1203
-6 -10 5 -0.9712 -0.3809
-6 -10 6 0.7769 -0.6190
-6 -9 1 1.2526 0.2072
-6 -9 2 -0.7299 -0.0774
-6 -9 3 -0.4950 -0.3694
-6 -9 4 1.3339 0.5802
-6 -9 5 -1.4859 -0.2040
-6 -9 6 1.0680 -0.4042
-6 -9 7 -0.2289 0.8199
-6 -9 8 -0.4900 -1.1202
-6 -9 9 0.4907 1.4162
-6 -8 1 1.1574 -0.0112
-6 -8 2 0.0349 -0.0607
-6 -8 3 -0.9456 0.0078
-6 -8 4 1.0502 0.0782
-6 -8 5 -0.9136 -0.0386
-6 -8 6 0.7911 -0.0761
-6 -8 7 -0.1933 0.2345
-6 -8 8 -0.7336 -0.6091
-6 -8 9 0.9316 1.1541
-6 -8 10 -0.1118 -1.4217
-6 -8 11 -0.6284 1.2057
-6 -7 1 -0.9524 -0.3099
-6 -7 2 1.6625 0.1751
-6 -7 3 -1.2582 0.0258
-6 -7 4 0.3536 -0.1220
-6 -7 5 -0.1654 0.0911
-6 -7 6 0.6441 0.0153
-6 -7 7 -0.4570 -0.1087
-6 -7 8 -0.6965 0.0668
-6 -7 9 1.3109 0.0746
-6 -7 10 -0.4278 -0.1112
-6 -7 11 -0.7813 0.0897
-6 -7 12 0.8197 -0.3601
-6 -6 1 -3.2006 -0.2641
-6 -6 2 2.6865 0.2073
-6 -6 3 -1.3137 -0.0396
-6 -6 4 0.2235 -0.0700
-6 -6 5 -0.2883 0.0794
-6 -6 6 0.9443 -0.0693
-6 -6 7 -0.6465 0.0419
-6 -6 8 -0.9037 0.0696
-6 -6 9 2.0117 -0.2744
-6 -6 10 -1.3586 0.4870
-6 -6 11 -0.0819 -0.5024
-6 -6 12 0.6098 0.1325
-6 -6 13 -0.1553 0.3964
-6 -6 14 -0.1707 -0.4972
-6 -5 1 -2.1896 -0.0650
-6 -5 2 1.5217 0.0880
-6 -5 3 -1.0311 -0.0497
-6 -5 4 0.9805 0.0561
-6 -5 5 -1.1541 -0.0704
-6 -5 6 1.0664 -0.0631
-6 -5 7 -0.1734 0.2760
-6 -5 8 -1.3584 -0.3317
-6 -5 9 2.3387 0.1978
-6 -5 10 -1.9019 -0.0463
-6 -5 11 0.7382 -0.0033
-6 -5 12 -0.0960 -0.0483
-6 -5 13 0.0971 0.0544
-6 -5 14 0.0174 0.2306
-6 -5 15 -0.4523 -0.7387
-6 -4 1 -0.1328 -0.1248
-6 -4 2 0.8776 0.0587
-6 -4 3 -2.0063 0.0262
-6 -4 4 2.4727 0.0275
-6 -4 5 -1.5690 -0.1474
-6 -4 6 -0.0471 0.0841
-6 -4 7 1.2546 0.1272
-6 -4 8 -1.6290 -0.2234
-6 -4 9 1.3491 0.1874
-6 -4 10 -0.7627 -0.1908
-6 -4 11 0.3138 0.2245
-6 -4 12 -0.2834 -0.1951
-6 -4 13 0.4170 0.1125
-6 -4 14 -0.2270 0.0557
-6 -4 15 -0.2902 -0.3210
-6 -4 16 0.6306 0.4368
-6 -3 1 -1.7406 -0.1672
-6 -3 2 3.3463 -0.0014
-6 -3 3 -4.2025 0.1672
-6 -3 4 3.1787 -0.1155
-6 -3 5 -0.3609 -0.0803
-6 -3 6 -2.2610 0.1386
-6 -3 7 2.7423 -0.0639
-6 -3 8 -1.2037 0.0824
-6 -3 9 -0.6406 -0.1681
-6 -3 10 1.3943 0.1430
-6 -3 11 -0.9637 -0.0476
-6 -3 12 0.0870 -0.0308
-6 -3 13 0.5084 0.1591
-6 -3 14 -0.5292 -0.2775
-6 -3 15 0.1719 0.1883
-6 -3 16 0.1067 0.0267
-6 -2 1 -5.5734 -0.0088
-6 -2 2 5.9274 -0.0628
-6 -2 3 -4.5793 0.1428
-6 -2 4 1.6674 -0.0830
-6 -2 5 1.6134 -0.0390
-6 -2 6 -3.2477 0.0216
-6 -2 7 2.2088 0.0743
-6 -2 8 0.4267 -0.0456
-6 -2 9 -2.5034 -0.0604
-6 -2 10 2.7392 0.0804
-6 -2 11 -1.5586 -0.0442
-6 -2 12 0.2342 0.0082
-6 -2 13 0.3895 0.0817
-6 -2 14 -0.2982 -0.1389
-6 -2 15 -0.0433 -0.0069
-6 -2 16 0.1637 0.2197
-6 -2 17 0.0374 -0.2256
-6 -1 1 -6.5053 0.0140
-6 -1 2 4.6934 0.0270
-6 -1 3 -1.6116 -0.0425
-6 -1 4 -1.2932 0.0754
-6 -1 5 2.5947 -0.0655
-6 -1 6 -1.7868 -0.0506
-6 -1 7 -0.3056 0.1602
-6 -1 8 2.2813 -0.1410
-6 -1 9 -3.1027 0.0768
-6 -1 10 2.5436 -0.0818
-6 -1 11 -1.2512 0.1117
-6 -1 12 0.2661 -0.1130
-6 -1 13 -0.1765 0.1013
-6 -1 14 0.7342 -0.0327
-6 -1 15 -1.2334 -0.0993
-6 -1 16 1.1780 0.1067
-6 -1 17 -0.6783 0.1126
-6 0 1 -3.2774 -0.0532
-6 0 2 0.4094 0.0167
-6 0 3 2.5383 -0.0164
-6 0 4 -3.7457 0.0389
-6 0 5 2.4292 -0.0282
-6 0 6 0.1304 -0.0121
-6 0 7 -1.9029 0.0083
-6 0 8 2.2740 0.0412
-6 0 9 -1.9502 -0.0516
-6 0 10 1.4360 0.0006
-6 0 11 -0.8077 0.0558
-6 0 12 0.4238 -0.0924
-6 0 13 -0.7260 0.1009
-6 0 14 1.4736 -0.0644
-6 0 15 -1.8646 0.0603
-6 0 16 1.4865 -0.2041
-6 0 17 -0.7648 0.3984
-6 0 18 0.3190 -0.4084
-6 1 1 0.6776 0.0275
-6 1 2 -2.8041 -0.1746
-6 1 3 4.3348 0.1699
-6 1 4 -3.9024 -0.0611
-6 1 5 1.4960 -0.0323
-6 1 6 0.7676 0.0717
-6 1 7 -1.0653 -0.0670
-6 1 8 0.1769 0.0083
-6 1 9 0.1093 0.0605
-6 1 10 0.3231 -0.0488
-6 1 11 -0.4536 -0.0286
-6 1 12 0.2289 0.0761
-6 1 13 -0.4249 -0.0903
-6 1 14 0.9878 0.1093
-6 1 15 -0.9915 -0.0723
-6 1 16 0.1808 -0.0356
-6 1 17 0.5802 0.0475
-6 1 18 -0.6014 0.1113
-6 2 1 1.7052 0.0160
-6 2 2 -2.4367 -0.1776
-6 2 3 2.7991 0.1420
-6 2 4 -1.9957 0.0333
-6 2 5 0.3808 -0.1702
-6 2 6 0.2057 0.1793
-6 2 7 0.9650 -0.0486
-6 2 8 -2.0720 -0.1575
-6 2 9 1.4258 0.2471
-6 2 10 -0.0003 -0.1040
-6 2 11 -0.3835 -0.1045
-6 2 12 -0.0862 0.1704
-6 2 13 0.0360 -0.1392
-6 2 14 0.4858 0.1234
-6 2 15 -0.2138 -0.0847
-6 2 16 -0.9673 0.0363
-6 2 17 1.7162 -0.1303
-6 3 1 0.4553 -0.1196
-6 3 2 -0.8369 -0.0417
-6 3 3 1.1661 0.0550
-6 3 4 -0.8926 0.0380
-6 3 5 0.4240 -0.1122
-6 3 6 -0.9538 0.1266
-6 3 7 2.3498 -0.0537
-6 3 8 -2.7287 -0.0634
-6 3 9 1.2010 0.0459
-6 3 10 0.5426 0.1384
-6 3 11 -0.7313 -0.2265
-6 3 12 0.0992 0.0687
-6 3 13 -0.3116 0.1307
-6 3 14 1.0515 -0.2111
-6 3 15 -0.7243 0.2864
-6 3 16 -0.6418 -0.3888
-6 3 17 1.3942 0.3396
-6 4 1 0.3129 -0.0549
-6 4 2 -1.2972 -0.0281
-6 4 3 1.8217 0.0524
-6 4 4 -1.5742 -0.1131
-6 4 5 1.1525 0.1681
-6 4 6 -1.4044 -0.0937
-6 4 7 2.0621 -0.0322
-6 4 8 -1.8685 0.0897
-6 4 9 0.4778 -0.1455
-6 4 10 0.7745 0.2034
-6 4 11 -0.7991 -0.0869
-6 4 12 0.4308 -0.1676
-6 4 13 -0.9425 0.2619
-6 4 14 1.7714 -0.1700
-6 4 15 -1.4410 0.2103
-6 4 16 0.1640 -0.4552
-6 5 1 1.6704 0.1136
-6 5 2 -2.7718 0.0644
-6 5 3 2.7597 -0.1693
-6 5 4 -1.8801 -0.0224
-6 5 5 1.0079 0.2296
-6 5 6 -0.7442 -0.1311
-6 5 7 0.9369 -0.0870
-6 5 8 -0.9600 0.1132
-6 5 9 0.4479 0.0072
-6 5 10 0.2507 -0.1350
-6 5 11 -0.6179 0.2644
-6 5 12 0.8260 -0.2606
-6 5 13 -1.3313 -0.0579
-6 5 14 1.7483 0.4494
-6 5 15 -1.3007 -0.4336
-6 5 16 0.3344 0.0098
-6 6 1 2.3894 0.2693
-6 6 2 -2.8947 0.1789
-6 6 3 2.3277 -0.3755
-6 6 4 -1.3939 0.0825
-6 6 5 0.8064 0.1644
-6 6 6 -0.5845 0.0286
-6 6 7 0.5372 -0.2961
-6 6 8 -0.5916 0.2272
-6 6 9 0.4421 0.0183
-6 6 10 0.2148 -0.1492
-6 6 11 -1.0365 0.1199
-6 6 12 1.4256 0.1109
-6 6 13 -1.3270 -0.5487
-6 6 14 0.9766 0.8527
-6 7 1 1.9149 0.4407
-6 7 2 -1.9187 0.0821
-6 7 3 1.4648 -0.1839
-6 7 4 -1.2153 -0.1512
-6 7 5 1.3377 0.2540
-6 7 6 -1.2099 0.1135
-6 7 7 0.6067 -0.4278
-6 7 8 -0.0774 0.3777
-6 7 9 -0.2097 -0.2905
-6 7 10 0.6889 0.4131
-6 7 11 -1.2499 -0.5839
-6 7 12 1.2098 0.6853
-6 8 1 1.0608 0.1588
-6 8 2 -0.8811 0.1903
-6 8 3 0.6632 -0.0516
-6 8 4 -0.8326 -0.2691
-6 8 5 1.2588 0.2249
-6 8 6 -1.1241 0.1152
-6 8 7 0.2393 -0.2502
-6 8 8 0.5092 0.1813
-6 8 9 -0.5740 -0.3459
-6 8 10 0.4106 0.7329
-5 -12 1 0.2947 -0.7773
-5 -11 1 -0.2819 -0.1742
-5 -11 2 -0.2466 0.0172
-5 -11 3 0.0995 -0.4227
-5 -11 4 0.0982 0.6506
-5 -11 5 0.0841 -0.1589
-5 -10 1 -0.4526 0.2460
-5 -10 2 -0.2010 -0.2992
-5 -10 3 -0.1406 -0.0729
-5 -10 4 0.4313 0.3579
-5 -10 5 -0.1852 -0.1150
-5 -10 6 0.0177 -0.5029
-5 -10 7 -0.1307 1.0790
-5 -10 8 0.1023 -1.3745
-5 -9 1 0.5003 0.0084
-5 -9 2 -0.7427 -0.0585
-5 -9 3 -0.2960 -0.0199
-5 -9 4 0.9028 0.1112
-5 -9 5 -0.6064 -0.0786
-5 -9 6 0.3266 -0.1042
-5 -9 7 -0.2427 0.3630
-5 -9 8 -0.2591 -0.6572
-5 -9 9 0.9094 1.0360
-5 -9 10 -0.8184 -1.4294
-5 -8 1 1.2990 -0.1791
-5 -8 2 -0.7768 0.0761
-5 -8 3 -0.6480 0.1053
-5 -8 4 0.9564 -0.1955
-5 -8 5 -0.1649 0.0843
-5 -8 6 -0.3071 0.1487
-5 -8 7 0.3378 -0.3487
-5 -8 8 -0.9079 0.3293
-5 -8 9 1.7546 0.1017
-5 -8 10 -1.5734 -0.8386
-5 -8 11 0.3772 1.4107
-5 -8 12 0.3694 -1.5637
-5 -7 1 0.3449 -0.1478
-5 -7 2 0.6137 0.0732
-5 -7 3 -1.3887 0.0942
-5 -7 4 0.6161 -0.2118
-5 -7 5 0.7701 0.1541
-5 -7 6 -1.0434 0.0452
-5 -7 7 0.4246 -0.2951
-5 -7 8 -0.4684 0.4694
-5 -7 9 1.2179 -0.3775
-5 -7 10 -1.1647 0.0335
-5 -7 11 -0.0405 0.2826
-5 -7 12 0.9329 -0.5565
-5 -7 13 -0.5333 1.0827
-5 -7 14 -0.3927 -1.6395
-5 -6 1 -1.9045 -0.0634
-5 -6 2 2.4133 0.0679
-5 -6 3 -1.9637 -0.0794
-5 -6 4 0.4140 0.0429
-5 -6 5 0.8113 0.0246
-5 -6 6 -0.4614 -0.1019
-5 -6 7 -0.6831 0.1152
-5 -6 8 0.8262 0.0086
-5 -6 9 0.1874 -0.1785
-5 -6 10 -0.7390 0.2946
-5 -6 11 -0.0025 -0.3905
-5 -6 12 0.9889 0.3123
-5 -6 13 -1.0714 0.2060
-5 -6 14 0.4867 -0.7675
-5 -6 15 -0.0946 0.5360
-5 -5 1 -2.5487 0.1139
-5 -5 2 2.0623 -0.0342
-5 -5 3 -1.0855 -0.0829
-5 -5 4 0.0857 0.1146
-5 -5 5 0.1584 -0.0690
-5 -5 6 0.4874 -0.0390
-5 -5 7 -1.1099 0.1461
-5 -5 8 0.6481 -0.1297
-5 -5 9 0.6735 0.0250
-5 -5 10 -1.4503 0.0397
-5 -5 11 0.8845 -0.0961
-5 -5 12 0.2607 0.1331
-5 -5 13 -0.7864 0.0006
-5 -5 14 0.4662 -0.0525
-5 -5 15 0.0178 -0.5132
-5 -5 16 -0.0886 1.3605
-5 -4 1 -0.0042 0.0703
-5 -4 2 -0.3571 0.0038
-5 -4 3 0.2826 0.0027
-5 -4 4 0.1582 -0.0550
-5 -4 5 -0.5691 0.0192
-5 -4 6 0.4075 0.0607
-5 -4 7 0.3932 -0.0913
-5 -4 8 -1.3978 0.1177
-5 -4 9 1.9986 -0.1114
-5 -4 10 -1.7199 -0.0343
-5 -4 11 0.6272 0.1867
-5 -4 12 0.4934 -0.1630
-5 -4 13 -0.7215 0.0831
-5 -4 14 -0.0456 0.0217
-5 -4 15 0.9121 -0.4180
-5 -4 16 -0.9612 0.9064
-5 -4 17 0.2803 -0.7669
-5 -3 1 2.4780 -0.2092
-5 -3 2 -0.9306 0.1875
-5 -3 3 -0.6165 -0.0014
-5 -3 4 1.4643 -0.1628
-5 -3 5 -1.0221 0.1129
-5 -3 6 -0.6897 0.0408
-5 -3 7 2.4592 -0.1280
-5 -3 8 -2.8682 0.1860
-5 -3 9 1.6882 -0.2076
-5 -3 10 0.1734 0.0826
-5 -3 11 -1.7053 0.0546
-5 -3 12 2.2885 0.0024
-5 -3 13 -1.6655 -0.0756
-5 -3 14 0.2083 -0.0365
-5 -3 15 0.9819 0.1046
-5 -3 16 -1.0259 -0.0248
-5 -3 17 0.2914 0.1504
-5 -3 18 0.1536 -0.4767
-5 -2 1 1.1220 -0.1739
-5 -2 2 1.8120 0.1542
-5 -2 3 -2.8073 -0.0428
-5 -2 4 1.8633 -0.0502
-5 -2 5 0.2813 0.0337
-5 -2 6 -2.4973 -0.0055
-5 -2 7 3.3046 0.0276
-5 -2 8 -1.9339 0.0040
-5 -2 9 -0.7204 -0.0699
-5 -2 10 2.9414 0.0228
-5 -2 11 -3.8096 0.0437
-5 -2 12 3.4634 0.0497
-5 -2 13 -2.2935 -0.1318
-5 -2 14 0.8084 -0.0021
-5 -2 15 0.1360 0.1350
-5 -2 16 -0.0635 -0.0861
-5 -2 17 -0.3765 0.0933
-5 -2 18 0.2569 -0.2286
-5 -1 1 -2.5354 0.0847
-5 -1 2 4.1562 0.0212
-5 -1 3 -2.3317 -0.1189
-5 -1 4 -1.0841 0.1345
-5 -1 5 3.7133 -0.0642
-5 -1 6 -4.2016 -0.0571
-5 -1 7 2.4443 0.1203
-5 -1 8 0.5512 -0.0404
-5 -1 9 -3.0975 -0.0507
-5 -1 10 4.0138 -0.0205
-5 -1 11 -3.5431 0.1399
-5 -1 12 2.6450 -0.1061
-5 -1 13 -1.7575 0.0059
-5 -1 14 0.9491 0.0196
-5 -1 15 -0.6079 -0.0870
-5 -1 16 0.9197 0.2502
-5 -1 17 -1.2229 -0.3020
-5 -1 18 0.8602 0.2186
-5 -1 19 -0.1648 -0.2392
-5 0 1 -3.8870 0.0788
-5 0 2 2.6878 0.0271
-5 0 3 1.5774 -0.1388
-5 0 4 -5.6262 0.1306
-5 0 5 6.6494 0.0101
-5 0 6 -4.3930 -0.1461
-5 0 7 0.7130 0.1140
-5 0 8 2.2225 0.0658
-5 0 9 -3.2570 -0.1768
-5 0 10 2.6542 0.0994
-5 0 11 -1.6359 0.0192
-5 0 12 1.1086 -0.0229
-5 0 13 -0.8945 -0.0272
-5 0 14 0.5811 0.0456
-5 0 15 -0.4395 -0.0791
-5 0 16 0.7689 0.1283
-5 0 17 -1.1265 -0.1253
-5 0 18 1.0102 0.1513
-5 0 19 -0.6167 -0.3021
-5 1 1 -1.1607 -0.0513
-5 1 2 -1.6304 -0.0181
-5 1 3 5.7200 0.0214
-5 1 4 -7.9140 -0.0078
-5 1 5 6.4364 0.0556
-5 1 6 -2.6033 -0.1164
-5 1 7 -0.7077 0.0836
-5 1 8 1.8381 0.0141
-5 1 9 -1.2346 -0.0593
-5 1 10 0.2922 0.0481
-5 1 11 0.0276 -0.0671
-5 1 12 0.1696 0.1096
-5 1 13 -0.1211 -0.0921
-5 1 14 -0.4382 0.0059
-5 1 15 0.9084 0.1003
-5 1 16 -0.8186 -0.2030
-5 1 17 0.4521 0.2337
-5 1 18 -0.2142 -0.0911
-5 1 19 0.1244 -0.1273
-5 2 1 2.4191 -0.0685
-5 2 2 -4.6465 -0.1361
-5 2 3 6.6285 0.1534
-5 2 4 -6.3391 0.0143
-5 2 5 3.4617 -0.1278
-5 2 6 -0.1851 0.0749
-5 2 7 -1.0463 0.0479
-5 2 8 0.1213 -0.1431
-5 2 9 1.1080 0.1705
-5 2 10 -1.2075 -0.1084
-5 2 11 0.4266 0.0214
-5 2 12 0.0415 -0.0251
-5 2 13 0.4932 0.1022
-5 2 14 -1.5470 -0.1384
-5 2 15 2.2095 0.1387
-5 2 16 -2.2423 -0.1749
-5 2 17 1.9814 0.1729
-5 2 18 -1.6022 -0.0437
-5 2 19 1.1373 -0.0585
-5 3 1 2.6770 -0.0875
-5 3 2 -3.8003 -0.1291
-5 3 3 4.3614 0.1038
-5 3 4 -3.2988 0.1256
-5 3 5 1.0156 -0.2358
-5 3 6 0.5542 0.1156
-5 3 7 -0.0999 0.0644
-5 3 8 -1.4375 -0.1443
-5 3 9 2.0560 0.0897
-5 3 10 -1.0567 0.0205
-5 3 11 -0.3661 -0.0161
-5 3 12 0.6673 -0.1456
-5 3 13 0.3392 0.2337
-5 3 14 -1.5042 -0.0731
-5 3 15 1.9455 -0.1374
-5 3 16 -1.9239 0.1381
-5 3 17 1.8729 -0.0166
-5 3 18 -1.6147 -0.0154
-5 3 19 1.0592 0.0075
-5 4 1 0.4737 -0.1142
-5 4 2 -1.7692 -0.0703
-5 4 3 2.6864 0.0563
-5 4 4 -2.3580 0.0604
-5 4 5 1.1828 -0.0452
-5 4 6 -0.4349 -0.0652
-5 4 7 0.7416 0.0967
-5 4 8 -1.4043 -0.0151
-5 4 9 1.3064 -0.1195
-5 4 10 -0.1873 0.2110
-5 4 11 -1.0290 -0.1351
-5 4 12 1.1756 -0.0367
-5 4 13 -0.2212 -0.0041
-5 4 14 -0.6949 0.3203
-5 4 15 0.8688 -0.5040
-5 4 16 -0.7923 0.2506
-5 4 17 0.8949 0.1725
-5 4 18 -0.8035 -0.3301
-5 5 1 -0.2392 -0.1127
-5 5 2 -1.9151 -0.0225
-5 5 3 3.1918 0.0322
-5 5 4 -2.8769 -0.0308
-5 5 5 1.6073 0.0802
-5 5 6 -0.4363 -0.0614
-5 5 7 -0.1122 -0.0279
-5 5 8 0.0293 0.0517
-5 5 9 0.3235 -0.0265
-5 5 10 -0.2868 0.0511
-5 5 11 -0.3406 -0.0826
-5 5 12 0.7858 0.1238
-5 5 13 -0.4049 -0.3234
-5 5 14 -0.2482 0.5845
-5 5 15 0.4085 -0.4947
-5 5 16 -0.2792 -0.0611
-5 5 17 0.2852 0.6085
-5 5 18 -0.2454 -0.6495
-5 6 1 1.1279 -0.1163
-5 6 2 -3.0380 0.0715
-5 6 3 3.2256 -0.0358
-5 6 4 -1.7536 -0.0168
-5 6 5 0.0095 -0.0122
-5 6 6 0.9876 0.1539
-5 6 7 -1.1826 -0.1717
-5 6 8 0.6324 -0.0700
-5 6 9 0.4695 0.2775
-5 6 10 -1.1081 -0.1684
-5 6 11 0.4495 -0.1031
-5 6 12 0.6619 0.2976
-5 6 13 -0.7868 -0.4062
-5 6 14 0.0334 0.3684
-5 6 15 0.4126 -0.0098
-5 6 16 -0.2257 -0.5446
-5 6 17 -0.0224 0.8467
-5 7 1 2.4766 -0.1215
-5 7 2 -2.9983 0.1648
-5 7 3 1.6347 0.0032
-5 7 4 0.6346 -0.1312
-5 7 5 -1.8682 0.0102
-5 7 6 1.4721 0.1768
-5 7 7 -0.5153 -0.0565
-5 7 8 -0.2125 -0.2995
-5 7 9 0.7573 0.3638
-5 7 10 -0.7742 0.0333
-5 7 11 -0.2149 -0.4298
-5 7 12 1.3648 0.4539
-5 7 13 -1.2747 -0.2087
-5 7 14 0.1507 -0.1394
-5 7 15 0.5180 0.5280
-5 8 1 2.6921 -0.4598
-5 8 2 -2.1244 0.4041
-5 8 3 0.1408 0.0731
-5 8 4 1.9629 -0.2972
-5 8 5 -2.2963 0.0915
-5 8 6 0.8017 0.0789
-5 8 7 0.6060 0.1344
-5 8 8 -0.6967 -0.3811
-5 8 9 0.0916 0.1363
-5 8 10 0.4328 0.4072
-5 8 11 -0.9170 -0.5796
-5 8 12 1.1935 0.2231
-5 8 13 -0.7142 0.2455
-5 8 14 -0.2199 -0.5522
-5 9 1 1.7789 -1.2191
-5 9 2 -1.1662 0.7360
-5 9 3 -0.3537 0.0785
-5 9 4 1.8092 -0.2805
-5 9 5 -1.7723 -0.0230
-5 9 6 0.3283 0.1148
-5 9 7 0.7473 0.1754
-5 9 8 -0.3957 -0.2941
-5 9 9 -0.4676 -0.0662
-5 9 10 0.6649 0.3891
-5 9 11 -0.3140 -0.1313
-4 -12 1 -0.0382 0.4019
-4 -12 2 -0.2667 -0.1014
-4 -12 3 0.4040 -0.7187
-4 -11 1 -0.8784 0.0249
-4 -11 2 0.5920 0.0812
-4 -11 3 -0.3913 -0.5020
-4 -11 4 0.3355 0.7806
-4 -11 5 -0.0287 -0.5381
-4 -11 6 -0.3181 0.0528
-4 -11 7 0.2653 0.3967
-4 -10 1 -1.9520 0.0628
-4 -10 2 1.1393 -0.1543
-4 -10 3 -0.4638 0.0875
-4 -10 4 0.0786 -0.0356
-4 -10 5 0.4415 0.0331
-4 -10 6 -0.8368 -0.0459
-4 -10 7 0.6561 0.2922
-4 -10 8 -0.1940 -0.8632
-4 -10 9 -0.0838 1.3542
-4 -9 1 -1.6863 0.0037
-4 -9 2 -0.0867 -0.0250
-4 -9 3 1.0005 0.0765
-4 -9 4 -1.0861 -0.1321
-4 -9 5 1.1102 -0.0015
-4 -9 6 -1.0721 0.2431
-4 -9 7 0.6679 -0.1985
-4 -9 8 -0.2467 -0.2115
-4 -9 9 0.1980 0.6551
-4 -9 10 -0.2556 -0.9978
-4 -9 11 0.1554 1.3401
-4 -8 1 -0.4957 -0.1406
-4 -8 2 -1.3491 0.1716
-4 -8 3 1.6329 -0.0602
-4 -8 4 -1.0006 -0.0621
-4 -8 5 0.5977 -0.0251
-4 -8 6 -0.5597 0.2358
-4 -8 7 0.5058 -0.3206
-4 -8 8 -0.5613 0.3059
-4 -8 9 0.8998 -0.2781
-4 -8 10 -1.0888 0.0146
-4 -8 11 0.7579 0.5750
-4 -8 12 -0.2379 -1.1090
-4 -8 13 -0.0201 1.3714
-4 -7 1 0.1152 -0.0775
-4 -7 2 -0.7104 -0.0217
-4 -7 3 0.1774 0.1448
-4 -7 4 0.4313 -0.1657
-4 -7 5 -0.3081 0.0753
-4 -7 6 -0.2676 -0.0094
-4 -7 7 0.6534 -0.0068
-4 -7 8 -0.8139 0.1563
-4 -7 9 0.9835 -0.4072
-4 -7 10 -0.9562 0.4013
-4 -7 11 0.4424 -0.0951
-4 -7 12 0.3106 -0.1668
-4 -7 13 -0.8068 0.4695
-4 -7 14 0.8558 -1.1701
-4 -7 15 -0.5824 1.7761
[truncated: 120,143 more chars]
