# Supplementary material
Source: MDPI journal article supplement (https://www.mdpi.com/2304-6740/12/3/73)
Supplement: s1 [file s1 › rac-[Ir(mpq)2(en)](PF6)/3a.cif]

data_a23061303a0229
_audit_creation_date               2023-08-24
_audit_creation_method
;
Olex2 1.5
(compiled 2023.03.06 svn.rbb2c1857 for OlexSys, GUI svn.r6748)
;
_shelx_SHELXL_version_number       '2018/3'
_audit_contact_author_address      ?
_audit_contact_author_email        ?
_audit_contact_author_name         ''
_audit_contact_author_phone        ?
_publ_contact_author_id_orcid      ?
_publ_section_references
;
Bourhis, L.J., Dolomanov, O.V., Gildea, R.J., Howard, J.A.K., Puschmann, H.
 (2015). Acta Cryst. A71, 59-75.

Dolomanov, O.V., Bourhis, L.J., Gildea, R.J, Howard, J.A.K. & Puschmann, H.
 (2009), J. Appl. Cryst. 42, 339-341.

Sheldrick, G.M. (2015). Acta Cryst. C71, 3-8.
;
_chemical_name_common              ?
_chemical_name_systematic          ?
_chemical_formula_moiety           'C34 H32 Ir N4 O2, F6 P'
_chemical_formula_sum              'C34 H32 F6 Ir N4 O2 P'
_chemical_formula_weight           865.80
_chemical_melting_point            ?
loop_
  _atom_type_symbol
  _atom_type_description
  _atom_type_scat_dispersion_real
  _atom_type_scat_dispersion_imag
  _atom_type_scat_source
 'C' 'C' 0.0181 0.0091 'International Tables Vol C Tables 4.2.6.8 and 6.1.1.4'
 'H' 'H' 0.0000 0.0000 'International Tables Vol C Tables 4.2.6.8 and 6.1.1.4'
 'F' 'F' 0.0727 0.0534 'International Tables Vol C Tables 4.2.6.8 and 6.1.1.4'
 'Ir' 'Ir' -4.7710 6.5667
 'International Tables Vol C Tables 4.2.6.8 and 6.1.1.4'
 'N' 'N' 0.0311 0.0180 'International Tables Vol C Tables 4.2.6.8 and 6.1.1.4'
 'O' 'O' 0.0492 0.0322 'International Tables Vol C Tables 4.2.6.8 and 6.1.1.4'
 'P' 'P' 0.2955 0.4335 'International Tables Vol C Tables 4.2.6.8 and 6.1.1.4'

_shelx_space_group_comment
;
The symmetry employed for this shelxl refinement is uniquely defined
by the following loop, which should always be used as a source of
symmetry information in preference to the above space-group names.
They are only intended as comments.
;
_space_group_crystal_system        'triclinic'
_space_group_IT_number             2
_space_group_name_H-M_alt          'P -1'
_space_group_name_Hall             '-P 1'
loop_
  _space_group_symop_operation_xyz
 'x, y, z'
 '-x, -y, -z'

_cell_length_a                     10.6791(3)
_cell_length_b                     12.5175(4)
_cell_length_c                     13.8170(4)
_cell_angle_alpha                  81.202(2)
_cell_angle_beta                   84.247(2)
_cell_angle_gamma                  82.229(2)
_cell_volume                       1802.52(9)
_cell_formula_units_Z              2
_cell_measurement_reflns_used      8057
_cell_measurement_temperature      149.99(10)
_cell_measurement_theta_max        72.8660
_cell_measurement_theta_min        4.1620
_shelx_estimated_absorpt_T_max     ?
_shelx_estimated_absorpt_T_min     ?
_exptl_absorpt_coefficient_mu      8.171
_exptl_absorpt_correction_T_max    0.18934
_exptl_absorpt_correction_T_min    0.08968
_exptl_absorpt_correction_type     sphere
_exptl_absorpt_process_details
;
CrysAlisPro 1.171.40.84a (Rigaku Oxford Diffraction, 2020)
Spherical absorption correction
using equivalent radius and absorption coefficient.
Empirical absorption correction using spherical harmonics,
implemented in SCALE3 ABSPACK scaling algorithm.
;
_exptl_absorpt_special_details     ?
_exptl_crystal_colour              red
_exptl_crystal_colour_primary      red
_exptl_crystal_density_diffrn      1.595
_exptl_crystal_density_meas        ?
_exptl_crystal_density_method      ?
_exptl_crystal_description         plate
_exptl_crystal_F_000               852
_exptl_crystal_size_max            0.05
_exptl_crystal_size_mid            0.04
_exptl_crystal_size_min            0.02
_exptl_crystal_size_rad            0.203
_exptl_transmission_factor_max     ?
_exptl_transmission_factor_min     ?
_diffrn_reflns_av_R_equivalents    0.0425
_diffrn_reflns_av_unetI/netI       0.0610
_diffrn_reflns_Laue_measured_fraction_full  0.999
_diffrn_reflns_Laue_measured_fraction_max  0.968
_diffrn_reflns_limit_h_max         11
_diffrn_reflns_limit_h_min         -13
_diffrn_reflns_limit_k_max         13
_diffrn_reflns_limit_k_min         -15
_diffrn_reflns_limit_l_max         16
_diffrn_reflns_limit_l_min         -17
_diffrn_reflns_number              12809
_diffrn_reflns_point_group_measured_fraction_full  0.999
_diffrn_reflns_point_group_measured_fraction_max  0.968
_diffrn_reflns_theta_full          67.684
_diffrn_reflns_theta_max           73.055
_diffrn_reflns_theta_min           3.247
_diffrn_ambient_temperature        149.99
_diffrn_detector_area_resol_mean   5.2913
_diffrn_detector_type              AtlasS2
_diffrn_measured_fraction_theta_full  0.999
_diffrn_measured_fraction_theta_max  0.968
_diffrn_measurement_details
;
List of Runs (angles in degrees, time in seconds):

  # Type    Start    End  Width  t~exp~   \w     \q     \k     \f   Frames
--------------------------------------------------------------------------
  1  \w   -105.00 -13.00   1.00    3.00    --  -41.39 -57.00-180.00   92
  2  \w   -113.00 -21.00   1.00    3.00    --  -41.39 -57.00 -60.00   92
  3  \w    -69.00  30.00   1.00    3.00    --  -41.39  57.00  90.00   99
  4  \w     51.00  87.00   1.00    3.00    --   41.39-125.00-120.00   36
  5  \w     43.00 109.00   1.00   12.00    --  105.29-125.00-150.00   66
  6  \w     80.00 106.00   1.00   12.00    --  105.29 -94.00  60.00   26
  7  \w     99.00 163.00   1.00   12.00    --  105.29 125.00  30.00   64
  8  \w     90.00 129.00   1.00   12.00    --  105.29  45.00 150.00   39
  9  \w     77.00 178.00   1.00   12.00    --  105.29  30.00  90.00  101
 10  \w    147.00 178.00   1.00   12.00    --  105.29  45.00 150.00   31
 11  \w     43.00  88.00   1.00   12.00    --  105.29 -61.00-180.00   45
 12  \w    103.00 128.00   1.00   12.00    --  105.29 -61.00-180.00   25
 13  \w    108.00 172.00   1.00   12.00    --  105.29  77.00   0.00   64
 14  \w    151.00 177.00   1.00   12.00    --  105.29  77.00-120.00   26
 15  \w     50.00  87.00   1.00   12.00    --  105.29-125.00  30.00   37
 16  \w     33.00 134.00   1.00   12.00    --  105.29 -61.00   0.00  101
 17  \w     81.00 111.00   1.00   12.00    --  105.29-125.00 -30.00   30
 18  \w     79.00 111.00   1.00   12.00    --  105.29-125.00  60.00   32
 19  \w     81.00 106.00   1.00   12.00    --  105.29 -94.00-180.00   25
 20  \w     76.00 177.00   1.00   12.00    --  105.29  61.00 -30.00  101
;
_diffrn_measurement_device         'four-circle diffractometer'
_diffrn_measurement_device_type    'SuperNova, Dual, Cu at home/near, AtlasS2'
_diffrn_measurement_method         '\w scans'
_diffrn_radiation_type             CuK\a
_diffrn_radiation_wavelength       1.54184
_diffrn_source                     ?
_reflns_Friedel_coverage           0.000
_reflns_Friedel_fraction_full      .
_reflns_Friedel_fraction_max       .
_reflns_number_gt                  6429
_reflns_number_total               6987
_reflns_special_details
;
 Reflections were merged by SHELXL according to the crystal
 class for the calculation of statistics and refinement.
 
 Structure factors included contributions from the .fab file.
 
 _reflns_Friedel_fraction is defined as the number of unique
 Friedel pairs measured divided by the number that would be
 possible theoretically, ignoring centric projections and
 systematic absences.
;
_reflns_threshold_expression       'I > 2\s(I)'
_computing_cell_refinement         'CrysAlisPro 1.171.40.84a (Rigaku OD, 2020)'
_computing_data_collection         'CrysAlisPro 1.171.40.84a (Rigaku OD, 2020)'
_computing_data_reduction          'CrysAlisPro 1.171.40.84a (Rigaku OD, 2020)'
_computing_molecular_graphics      'Olex2 1.5 (Dolomanov et al., 2009)'
_computing_publication_material    'Olex2 1.5 (Dolomanov et al., 2009)'
_computing_structure_refinement    'SHELXL 2018/3 (Sheldrick, 2015)'
_computing_structure_solution      'olex2.solve 1.5 (Bourhis et al., 2015)'
_refine_diff_density_max           1.510
_refine_diff_density_min           -0.714
_refine_diff_density_rms           0.115
_refine_ls_extinction_coef         .
_refine_ls_extinction_method       none
_refine_ls_goodness_of_fit_ref     1.037
_refine_ls_hydrogen_treatment      constr
_refine_ls_matrix_type             full
_refine_ls_number_parameters       435
_refine_ls_number_reflns           6987
_refine_ls_number_restraints       3
_refine_ls_R_factor_all            0.0362
_refine_ls_R_factor_gt             0.0329
_refine_ls_restrained_S_all        1.095
_refine_ls_shift/su_max            0.001
_refine_ls_shift/su_mean           0.000
_refine_ls_structure_factor_coef   Fsqd
_refine_ls_weighting_details      
 'w=1/[\s^2^(Fo^2^)+(0.0341P)^2^] where P=(Fo^2^+2Fc^2^)/3'
_refine_ls_weighting_scheme        calc
_refine_ls_wR_factor_gt            0.0783
_refine_ls_wR_factor_ref           0.0807
_refine_special_details            ?
_olex2_refinement_description
;
1. Fixed Uiso
 At 1.2 times of:
  All C(H) groups, All C(H,H) groups, All N(H,H) groups
 At 1.5 times of:
  All C(H,H,H) groups
2. Restrained distances
 H17-H3A
 2.1 with sigma of 0.02
 H3A-H17
 2.1 with sigma of 0.02
 H2-H4A
 2.4 with sigma of 0.02
3.a Secondary CH2 refined with riding coordinates:
 N3(H3A,H3B), N4(H4A,H4B), C33(H33A,H33B), C34(H34A,H34B)
3.b Aromatic/amide H refined with riding coordinates:
 C12(H12), C17(H17), C30(H30), C28(H28), C15(H15), C14(H14), C2(H2), C5(H5),
 C31(H31), C4(H4), C3(H3), C18(H18), C8(H8), C24(H24), C20(H20), C19(H19),
 C23(H23), C7(H7)
3.c Idealised Me refined as rotating group:
 C32(H32A,H32B,H32C), C16(H16A,H16B,H16C)
;
_atom_sites_solution_hydrogens     geom
_atom_sites_solution_primary       iterative
_atom_sites_solution_secondary     ?
loop_
  _atom_site_label
  _atom_site_type_symbol
  _atom_site_fract_x
  _atom_site_fract_y
  _atom_site_fract_z
  _atom_site_U_iso_or_equiv
  _atom_site_adp_type
  _atom_site_occupancy
  _atom_site_site_symmetry_order
  _atom_site_calc_flag
  _atom_site_refinement_flags_posn
  _atom_site_refinement_flags_adp
  _atom_site_refinement_flags_occupancy
  _atom_site_disorder_assembly
  _atom_site_disorder_group
 Ir1 Ir 0.39249(2) 0.31685(2) 0.29447(2) 0.02950(6) Uani 1 1 d . . . . .
 P1 P 0.74865(11) 0.27017(8) -0.06665(8) 0.0398(2) Uani 1 1 d . . . . .
 F2 F 0.8391(3) 0.1653(2) -0.0938(3) 0.0581(7) Uani 1 1 d . . . . .
 F1 F 0.6573(3) 0.3758(2) -0.0395(3) 0.0590(7) Uani 1 1 d . . . . .
 F6 F 0.8681(3) 0.3363(3) -0.0729(3) 0.0573(7) Uani 1 1 d . . . . .
 O1 O 0.8163(3) 0.2024(2) 0.4818(3) 0.0444(7) Uani 1 1 d . . . . .
 F3 F 0.7338(3) 0.3121(3) -0.1806(2) 0.0615(8) Uani 1 1 d . . . . .
 N2 N 0.3201(3) 0.1696(2) 0.3018(2) 0.0316(6) Uani 1 1 d . . . . .
 F4 F 0.6291(3) 0.2049(3) -0.0605(3) 0.0643(8) Uani 1 1 d . . . . .
 F5 F 0.7609(4) 0.2308(3) 0.0478(2) 0.0704(9) Uani 1 1 d . . . . .
 O2 O 0.0905(4) 0.2706(3) 0.6295(3) 0.0526(8) Uani 1 1 d . . . . .
 N1 N 0.4694(3) 0.4596(2) 0.3025(2) 0.0325(6) Uani 1 1 d . . . . .
 N3 N 0.2575(3) 0.4289(3) 0.2027(3) 0.0351(7) Uani 1 1 d . . . . .
 H3A H 0.177563 0.428312 0.232378 0.042 Uiso 1 1 calc DR U . . .
 H3B H 0.277996 0.498054 0.196547 0.042 Uiso 1 1 calc R U . . .
 N4 N 0.4600(4) 0.2823(3) 0.1426(3) 0.0372(7) Uani 1 1 d . . . . .
 H4A H 0.545889 0.280117 0.133696 0.045 Uiso 1 1 calc DR U . . .
 H4B H 0.439349 0.216354 0.134007 0.045 Uiso 1 1 calc R U . . .
 C11 C 0.3019(4) 0.3577(3) 0.4200(3) 0.0323(7) Uani 1 1 d . . . . .
 C25 C 0.4067(4) 0.0810(3) 0.3202(3) 0.0363(8) Uani 1 1 d . . . . .
 C27 C 0.5286(4) 0.2155(3) 0.3608(3) 0.0335(7) Uani 1 1 d . . . . .
 C29 C 0.7230(4) 0.1636(3) 0.4412(3) 0.0365(8) Uani 1 1 d . . . . .
 C22 C 0.2001(4) 0.1540(3) 0.2796(3) 0.0371(8) Uani 1 1 d . . . . .
 C10 C 0.3049(4) 0.4678(3) 0.4309(3) 0.0374(8) Uani 1 1 d . . . . .
 C26 C 0.5211(4) 0.1040(3) 0.3587(3) 0.0350(8) Uani 1 1 d . . . . .
 C9 C 0.4011(4) 0.5213(3) 0.3661(3) 0.0361(8) Uani 1 1 d . . . . .
 C13 C 0.1550(4) 0.3414(4) 0.5647(3) 0.0413(9) Uani 1 1 d . . . . .
 C12 C 0.2289(4) 0.2951(4) 0.4900(3) 0.0383(8) Uani 1 1 d . . . . .
 H12 H 0.229824 0.219760 0.486434 0.046 Uiso 1 1 calc R U . . .
 C17 C 0.0991(4) 0.2368(4) 0.2849(3) 0.0397(8) Uani 1 1 d . . . . .
 H17 H 0.112119 0.302930 0.306074 0.048 Uiso 1 1 calc DR U . . .
 C21 C 0.1777(5) 0.0524(4) 0.2557(3) 0.0430(9) Uani 1 1 d . . . . .
 C1 C 0.5772(4) 0.4969(3) 0.2504(3) 0.0340(8) Uani 1 1 d . . . . .
 C33 C 0.2621(4) 0.3949(3) 0.1041(3) 0.0382(8) Uani 1 1 d . . . . .
 H33A H 0.220291 0.454169 0.057856 0.046 Uiso 1 1 calc R U . . .
 H33B H 0.217664 0.329726 0.107811 0.046 Uiso 1 1 calc R U . . .
 C30 C 0.7166(4) 0.0537(3) 0.4376(4) 0.0425(9) Uani 1 1 d . . . . .
 H30 H 0.780588 -0.000461 0.463389 0.051 Uiso 1 1 calc R U . . .
 C28 C 0.6298(4) 0.2430(3) 0.4025(3) 0.0351(8) Uani 1 1 d . . . . .
 H28 H 0.635989 0.317595 0.404821 0.042 Uiso 1 1 calc R U . . .
 C15 C 0.2274(4) 0.5139(3) 0.5049(3) 0.0411(9) Uani 1 1 d . . . . .
 H15 H 0.227008 0.588897 0.509601 0.049 Uiso 1 1 calc R U . . .
 C14 C 0.1514(5) 0.4522(4) 0.5711(3) 0.0449(9) Uani 1 1 d . . . . .
 H14 H 0.097347 0.484411 0.620474 0.054 Uiso 1 1 calc R U . . .
 C2 C 0.6640(4) 0.4283(3) 0.1979(3) 0.0391(8) Uani 1 1 d . . . . .
 H2 H 0.648738 0.355233 0.198269 0.047 Uiso 1 1 calc DR U . . .
 C6 C 0.6066(4) 0.6033(3) 0.2555(3) 0.0398(9) Uani 1 1 d . . . . .
 C5 C 0.7180(5) 0.6384(4) 0.2010(4) 0.0451(10) Uani 1 1 d . . . . .
 H5 H 0.737026 0.710143 0.202030 0.054 Uiso 1 1 calc R U . . .
 C31 C 0.6165(5) 0.0246(3) 0.3962(4) 0.0424(9) Uani 1 1 d . . . . .
 H31 H 0.611911 -0.050077 0.392965 0.051 Uiso 1 1 calc R U . . .
 C4 C 0.7970(5) 0.5713(4) 0.1478(3) 0.0456(10) Uani 1 1 d . . . . .
 H4 H 0.870400 0.596300 0.111543 0.055 Uiso 1 1 calc R U . . .
 C3 C 0.7705(4) 0.4639(4) 0.1460(3) 0.0422(9) Uani 1 1 d . . . . .
 H3 H 0.826309 0.416550 0.109045 0.051 Uiso 1 1 calc R U . . .
 C34 C 0.3995(4) 0.3695(3) 0.0695(3) 0.0396(9) Uani 1 1 d . . . . .
 H34A H 0.406826 0.344507 0.004336 0.048 Uiso 1 1 calc R U . . .
 H34B H 0.442781 0.435638 0.063279 0.048 Uiso 1 1 calc R U . . .
 C32 C 0.9224(5) 0.1276(4) 0.5101(4) 0.0470(10) Uani 1 1 d . . . . .
 H32A H 0.964543 0.096766 0.452470 0.070 Uiso 1 1 calc R U . . .
 H32B H 0.894114 0.068931 0.559413 0.070 Uiso 1 1 calc R U . . .
 H32C H 0.981916 0.165241 0.537961 0.070 Uiso 1 1 calc R U . . .
 C18 C -0.0190(5) 0.2242(4) 0.2599(4) 0.0484(10) Uani 1 1 d . . . . .
 H18 H -0.086714 0.281460 0.263045 0.058 Uiso 1 1 calc R U . . .
 C8 C 0.4279(5) 0.6275(3) 0.3719(3) 0.0422(9) Uani 1 1 d . . . . .
 H8 H 0.375883 0.670703 0.414780 0.051 Uiso 1 1 calc R U . . .
 C24 C 0.3843(5) -0.0223(4) 0.3021(4) 0.0473(10) Uani 1 1 d . . . . .
 H24 H 0.446261 -0.083347 0.316041 0.057 Uiso 1 1 calc R U . . .
 C20 C 0.0555(5) 0.0417(4) 0.2286(4) 0.0505(11) Uani 1 1 d . . . . .
 H20 H 0.040077 -0.024897 0.209730 0.061 Uiso 1 1 calc R U . . .
 C19 C -0.0389(5) 0.1252(5) 0.2293(4) 0.0526(11) Uani 1 1 d . . . . .
 H19 H -0.119282 0.117457 0.209192 0.063 Uiso 1 1 calc R U . . .
 C23 C 0.2759(5) -0.0355(4) 0.2652(4) 0.0493(11) Uani 1 1 d . . . . .
 H23 H 0.265699 -0.103255 0.245787 0.059 Uiso 1 1 calc R U . . .
 C7 C 0.5268(5) 0.6676(3) 0.3169(4) 0.0459(10) Uani 1 1 d . . . . .
 H7 H 0.542752 0.739864 0.319542 0.055 Uiso 1 1 calc R U . . .
 C16 C -0.0094(5) 0.3147(5) 0.6946(4) 0.0569(13) Uani 1 1 d . . . . .
 H16A H -0.068571 0.367465 0.656465 0.085 Uiso 1 1 calc R U . . .
 H16B H 0.026560 0.351089 0.741419 0.085 Uiso 1 1 calc R U . . .
 H16C H -0.054643 0.255727 0.730485 0.085 Uiso 1 1 calc R U . . .

loop_
  _atom_site_aniso_label
  _atom_site_aniso_U_11
  _atom_site_aniso_U_22
  _atom_site_aniso_U_33
  _atom_site_aniso_U_23
  _atom_site_aniso_U_13
  _atom_site_aniso_U_12
 Ir1 0.03354(9) 0.02672(9) 0.02871(9) -0.00623(5) -0.00039(6) -0.00435(6)
 P1 0.0406(5) 0.0364(5) 0.0411(5) -0.0070(4) 0.0047(4) -0.0044(4)
 F2 0.0559(17) 0.0440(14) 0.072(2) -0.0159(13) 0.0093(14) 0.0021(12)
 F1 0.0525(16) 0.0437(14) 0.075(2) -0.0125(13) 0.0201(14) -0.0002(12)
 F6 0.0478(16) 0.0552(16) 0.071(2) -0.0163(14) 0.0020(14) -0.0122(12)
 O1 0.0429(16) 0.0398(15) 0.0526(18) -0.0105(13) -0.0138(14) -0.0006(12)
 F3 0.068(2) 0.0708(19) 0.0438(16) -0.0023(13) -0.0047(14) -0.0072(15)
 N2 0.0380(17) 0.0280(14) 0.0302(15) -0.0057(11) -0.0012(12) -0.0085(12)
 F4 0.0514(17) 0.0563(17) 0.088(2) -0.0177(16) 0.0088(16) -0.0197(14)
 F5 0.097(3) 0.066(2) 0.0439(17) 0.0000(14) -0.0031(17) -0.0047(18)
 O2 0.054(2) 0.063(2) 0.0422(17) -0.0148(15) 0.0145(15) -0.0175(16)
 N1 0.0416(17) 0.0215(13) 0.0354(16) -0.0037(11) -0.0043(13) -0.0068(12)
 N3 0.0374(17) 0.0316(15) 0.0359(17) -0.0055(12) -0.0049(13) -0.0009(12)
 N4 0.0441(19) 0.0347(16) 0.0334(17) -0.0069(13) -0.0006(14) -0.0061(13)
 C11 0.0337(18) 0.0371(19) 0.0263(17) -0.0085(14) 0.0008(14) -0.0026(14)
 C25 0.042(2) 0.0311(18) 0.036(2) -0.0069(14) 0.0029(16) -0.0060(15)
 C27 0.0363(19) 0.0308(18) 0.0316(18) -0.0035(14) 0.0025(15) -0.0022(14)
 C29 0.037(2) 0.0373(19) 0.0354(19) -0.0083(15) -0.0034(16) -0.0034(15)
 C22 0.039(2) 0.042(2) 0.0308(18) -0.0025(15) 0.0000(15) -0.0126(16)
 C10 0.042(2) 0.0362(19) 0.035(2) -0.0104(15) -0.0034(16) 0.0005(16)
 C26 0.038(2) 0.0319(18) 0.0355(19) -0.0087(14) 0.0006(15) -0.0055(15)
 C9 0.043(2) 0.0305(18) 0.0352(19) -0.0071(14) -0.0074(16) 0.0016(15)
 C13 0.039(2) 0.053(2) 0.034(2) -0.0103(17) 0.0018(16) -0.0091(18)
 C12 0.042(2) 0.043(2) 0.0323(19) -0.0100(16) -0.0015(16) -0.0075(16)
 C17 0.040(2) 0.044(2) 0.034(2) -0.0007(16) 0.0004(16) -0.0110(17)
 C21 0.049(2) 0.043(2) 0.041(2) -0.0081(17) -0.0040(18) -0.0151(18)
 C1 0.039(2) 0.0304(17) 0.0334(19) -0.0012(14) -0.0081(15) -0.0061(14)
 C33 0.044(2) 0.044(2) 0.0283(18) -0.0042(15) -0.0073(16) -0.0081(17)
 C30 0.042(2) 0.036(2) 0.047(2) -0.0026(17) -0.0062(18) 0.0027(16)
 C28 0.041(2) 0.0307(17) 0.0347(19) -0.0080(14) -0.0022(16) -0.0048(15)
 C15 0.044(2) 0.038(2) 0.044(2) -0.0170(17) -0.0048(18) 0.0000(16)
 C14 0.043(2) 0.054(2) 0.040(2) -0.0199(19) 0.0007(18) -0.0012(18)
 C2 0.043(2) 0.0369(19) 0.037(2) -0.0029(15) -0.0015(17) -0.0080(16)
 C6 0.046(2) 0.0336(19) 0.041(2) 0.0005(15) -0.0117(18) -0.0085(16)
 C5 0.050(3) 0.041(2) 0.046(2) -0.0027(18) -0.008(2) -0.0154(18)
 C31 0.048(2) 0.0290(18) 0.051(2) -0.0045(16) -0.0055(19) -0.0055(16)
 C4 0.049(2) 0.052(2) 0.038(2) 0.0011(18) -0.0081(18) -0.022(2)
 C3 0.041(2) 0.048(2) 0.038(2) -0.0033(17) -0.0008(17) -0.0102(18)
 C34 0.049(2) 0.039(2) 0.0305(19) -0.0033(15) -0.0016(17) -0.0074(17)
 C32 0.042(2) 0.046(2) 0.052(3) -0.0050(19) -0.0101(19) -0.0010(18)
 C18 0.040(2) 0.058(3) 0.045(2) 0.002(2) -0.0053(19) -0.0080(19)
 C8 0.052(2) 0.0323(19) 0.044(2) -0.0111(16) -0.0071(19) -0.0030(17)
 C24 0.049(2) 0.034(2) 0.061(3) -0.0127(19) -0.002(2) -0.0086(18)
 C20 0.055(3) 0.052(3) 0.049(3) -0.009(2) -0.005(2) -0.022(2)
 C19 0.041(2) 0.065(3) 0.055(3) -0.004(2) -0.012(2) -0.019(2)
 C23 0.058(3) 0.039(2) 0.055(3) -0.0164(19) -0.002(2) -0.015(2)
 C7 0.064(3) 0.0284(19) 0.048(2) -0.0074(16) -0.011(2) -0.0079(18)
 C16 0.047(3) 0.084(4) 0.042(3) -0.020(2) 0.015(2) -0.013(2)

_geom_special_details
;
 All esds (except the esd in the dihedral angle between two l.s. planes)
 are estimated using the full covariance matrix.  The cell esds are taken
 into account individually in the estimation of esds in distances, angles
 and torsion angles; correlations between esds in cell parameters are only
 used when they are defined by crystal symmetry.  An approximate (isotropic)
 treatment of cell esds is used for estimating esds involving l.s. planes.
;
loop_
  _geom_bond_atom_site_label_1
  _geom_bond_atom_site_label_2
  _geom_bond_distance
  _geom_bond_site_symmetry_2
  _geom_bond_publ_flag
 Ir1 N2 2.078(3) . ?
 Ir1 N1 2.087(3) . ?
 Ir1 N3 2.220(3) . ?
 Ir1 N4 2.236(3) . ?
 Ir1 C11 2.002(4) . ?
 Ir1 C27 1.994(4) . ?
 P1 F2 1.591(3) . ?
 P1 F1 1.603(3) . ?
 P1 F6 1.600(3) . ?
 P1 F3 1.598(3) . ?
 P1 F4 1.594(3) . ?
 P1 F5 1.596(4) . ?
 O1 C29 1.367(5) . ?
 O1 C32 1.415(6) . ?
 N2 C25 1.355(6) . ?
 N2 C22 1.393(5) . ?
 O2 C13 1.364(6) . ?
 O2 C16 1.433(6) . ?
 N1 C9 1.352(6) . ?
 N1 C1 1.392(5) . ?
 N3 H3A 0.9100 . ?
 N3 H3B 0.9100 . ?
 N3 C33 1.483(5) . ?
 N4 H4A 0.9100 . ?
 N4 H4B 0.9100 . ?
 N4 C34 1.494(5) . ?
 C11 C10 1.413(6) . ?
 C11 C12 1.392(6) . ?
 C25 C26 1.460(6) . ?
 C25 C24 1.408(6) . ?
 C27 C26 1.413(5) . ?
 C27 C28 1.380(6) . ?
 C29 C30 1.397(6) . ?
 C29 C28 1.394(6) . ?
 C22 C17 1.396(7) . ?
 C22 C21 1.418(6) . ?
 C10 C9 1.458(6) . ?
 C10 C15 1.395(6) . ?
 C26 C31 1.403(6) . ?
 C9 C8 1.412(6) . ?
 C13 C12 1.386(6) . ?
 C13 C14 1.398(7) . ?
 C12 H12 0.9500 . ?
 C17 H17 0.9500 . ?
 C17 C18 1.376(7) . ?
 C21 C20 1.422(7) . ?
 C21 C23 1.415(7) . ?
 C1 C2 1.402(6) . ?
 C1 C6 1.422(5) . ?
 C33 H33A 0.9900 . ?
 C33 H33B 0.9900 . ?
 C33 C34 1.505(6) . ?
 C30 H30 0.9500 . ?
 C30 C31 1.377(7) . ?
 C28 H28 0.9500 . ?
 C15 H15 0.9500 . ?
 C15 C14 1.378(7) . ?
 C14 H14 0.9500 . ?
 C2 H2 0.9500 . ?
 C2 C3 1.372(6) . ?
 C6 C5 1.427(7) . ?
 C6 C7 1.403(7) . ?
 C5 H5 0.9500 . ?
 C5 C4 1.353(8) . ?
 C31 H31 0.9500 . ?
 C4 H4 0.9500 . ?
 C4 C3 1.415(6) . ?
 C3 H3 0.9500 . ?
 C34 H34A 0.9900 . ?
 C34 H34B 0.9900 . ?
 C32 H32A 0.9800 . ?
 C32 H32B 0.9800 . ?
 C32 H32C 0.9800 . ?
 C18 H18 0.9500 . ?
 C18 C19 1.417(8) . ?
 C8 H8 0.9500 . ?
 C8 C7 1.347(7) . ?
 C24 H24 0.9500 . ?
 C24 C23 1.351(7) . ?
 C20 H20 0.9500 . ?
 C20 C19 1.350(8) . ?
 C19 H19 0.9500 . ?
 C23 H23 0.9500 . ?
 C7 H7 0.9500 . ?
 C16 H16A 0.9800 . ?
 C16 H16B 0.9800 . ?
 C16 H16C 0.9800 . ?

loop_
  _geom_angle_atom_site_label_1
  _geom_angle_atom_site_label_2
  _geom_angle_atom_site_label_3
  _geom_angle
  _geom_angle_site_symmetry_1
  _geom_angle_site_symmetry_3
  _geom_angle_publ_flag
 N2 Ir1 N1 173.98(12) . . ?
 N2 Ir1 N3 101.56(13) . . ?
 N2 Ir1 N4 81.97(13) . . ?
 N1 Ir1 N3 83.20(12) . . ?
 N1 Ir1 N4 102.79(13) . . ?
 N3 Ir1 N4 77.45(13) . . ?
 C11 Ir1 N2 96.31(14) . . ?
 C11 Ir1 N1 79.66(15) . . ?
 C11 Ir1 N3 92.89(15) . . ?
 C11 Ir1 N4 169.56(15) . . ?
 C27 Ir1 N2 79.67(14) . . ?
 C27 Ir1 N1 96.10(14) . . ?
 C27 Ir1 N3 172.50(14) . . ?
 C27 Ir1 N4 95.48(15) . . ?
 C27 Ir1 C11 94.33(16) . . ?
 F2 P1 F1 179.8(2) . . ?
 F2 P1 F6 90.61(17) . . ?
 F2 P1 F3 90.32(19) . . ?
 F2 P1 F4 89.70(18) . . ?
 F2 P1 F5 91.1(2) . . ?
 F6 P1 F1 89.48(17) . . ?
 F3 P1 F1 89.55(19) . . ?
 F3 P1 F6 89.23(19) . . ?
 F4 P1 F1 90.20(18) . . ?
 F4 P1 F6 179.67(19) . . ?
 F4 P1 F3 90.7(2) . . ?
 F4 P1 F5 89.2(2) . . ?
 F5 P1 F1 89.0(2) . . ?
 F5 P1 F6 90.9(2) . . ?
 F5 P1 F3 178.6(2) . . ?
 C29 O1 C32 117.5(3) . . ?
 C25 N2 Ir1 114.0(3) . . ?
 C25 N2 C22 118.3(3) . . ?
 C22 N2 Ir1 127.3(3) . . ?
 C13 O2 C16 118.2(4) . . ?
 C9 N1 Ir1 113.1(3) . . ?
 C9 N1 C1 118.7(3) . . ?
 C1 N1 Ir1 128.2(3) . . ?
 Ir1 N3 H3A 109.6 . . ?
 Ir1 N3 H3B 109.6 . . ?
 H3A N3 H3B 108.1 . . ?
 C33 N3 Ir1 110.1(2) . . ?
 C33 N3 H3A 109.6 . . ?
 C33 N3 H3B 109.6 . . ?
 Ir1 N4 H4A 109.8 . . ?
 Ir1 N4 H4B 109.8 . . ?
 H4A N4 H4B 108.3 . . ?
 C34 N4 Ir1 109.3(3) . . ?
 C34 N4 H4A 109.8 . . ?
 C34 N4 H4B 109.8 . . ?
 C10 C11 Ir1 113.4(3) . . ?
 C12 C11 Ir1 128.0(3) . . ?
 C12 C11 C10 118.3(4) . . ?
 N2 C25 C26 113.8(3) . . ?
 N2 C25 C24 121.2(4) . . ?
 C24 C25 C26 125.0(4) . . ?
 C26 C27 Ir1 114.4(3) . . ?
 C28 C27 Ir1 127.2(3) . . ?
 C28 C27 C26 118.3(4) . . ?
 O1 C29 C30 124.7(4) . . ?
 O1 C29 C28 115.0(3) . . ?
 C28 C29 C30 120.3(4) . . ?
 N2 C22 C17 120.2(4) . . ?
 N2 C22 C21 120.5(4) . . ?
 C17 C22 C21 119.2(4) . . ?
 C11 C10 C9 114.5(4) . . ?
 C15 C10 C11 120.2(4) . . ?
 C15 C10 C9 125.1(4) . . ?
 C27 C26 C25 115.0(4) . . ?
 C31 C26 C25 124.8(4) . . ?
 C31 C26 C27 120.1(4) . . ?
 N1 C9 C10 115.1(3) . . ?
 N1 C9 C8 121.4(4) . . ?
 C8 C9 C10 123.4(4) . . ?
 O2 C13 C12 114.8(4) . . ?
 O2 C13 C14 124.4(4) . . ?
 C12 C13 C14 120.8(4) . . ?
 C11 C12 H12 119.7 . . ?
 C13 C12 C11 120.7(4) . . ?
 C13 C12 H12 119.7 . . ?
 C22 C17 H17 119.5 . . ?
 C18 C17 C22 121.0(4) . . ?
 C18 C17 H17 119.5 . . ?
 C22 C21 C20 118.7(5) . . ?
 C23 C21 C22 118.4(4) . . ?
 C23 C21 C20 122.9(4) . . ?
 N1 C1 C2 121.0(3) . . ?
 N1 C1 C6 120.5(4) . . ?
 C2 C1 C6 118.3(4) . . ?
 N3 C33 H33A 110.2 . . ?
 N3 C33 H33B 110.2 . . ?
 N3 C33 C34 107.4(3) . . ?
 H33A C33 H33B 108.5 . . ?
 C34 C33 H33A 110.2 . . ?
 C34 C33 H33B 110.2 . . ?
 C29 C30 H30 120.4 . . ?
 C31 C30 C29 119.2(4) . . ?
 C31 C30 H30 120.4 . . ?
 C27 C28 C29 121.3(4) . . ?
 C27 C28 H28 119.4 . . ?
 C29 C28 H28 119.4 . . ?
 C10 C15 H15 119.6 . . ?
 C14 C15 C10 120.8(4) . . ?
 C14 C15 H15 119.6 . . ?
 C13 C14 H14 120.5 . . ?
 C15 C14 C13 119.0(4) . . ?
 C15 C14 H14 120.5 . . ?
 C1 C2 H2 119.1 . . ?
 C3 C2 C1 121.8(4) . . ?
 C3 C2 H2 119.1 . . ?
 C1 C6 C5 118.7(4) . . ?
 C7 C6 C1 118.3(4) . . ?
 C7 C6 C5 123.0(4) . . ?
 C6 C5 H5 119.4 . . ?
 C4 C5 C6 121.2(4) . . ?
 C4 C5 H5 119.4 . . ?
 C26 C31 H31 119.7 . . ?
 C30 C31 C26 120.7(4) . . ?
 C30 C31 H31 119.7 . . ?
 C5 C4 H4 120.0 . . ?
 C5 C4 C3 120.1(4) . . ?
 C3 C4 H4 120.0 . . ?
 C2 C3 C4 119.7(5) . . ?
 C2 C3 H3 120.1 . . ?
 C4 C3 H3 120.1 . . ?
 N4 C34 C33 108.6(3) . . ?
 N4 C34 H34A 110.0 . . ?
 N4 C34 H34B 110.0 . . ?
 C33 C34 H34A 110.0 . . ?
 C33 C34 H34B 110.0 . . ?
 H34A C34 H34B 108.3 . . ?
 O1 C32 H32A 109.5 . . ?
 O1 C32 H32B 109.5 . . ?
 O1 C32 H32C 109.5 . . ?
 H32A C32 H32B 109.5 . . ?
 H32A C32 H32C 109.5 . . ?
 H32B C32 H32C 109.5 . . ?
 C17 C18 H18 120.2 . . ?
 C17 C18 C19 119.6(5) . . ?
 C19 C18 H18 120.2 . . ?
 C9 C8 H8 119.9 . . ?
 C7 C8 C9 120.2(4) . . ?
 C7 C8 H8 119.9 . . ?
 C25 C24 H24 119.6 . . ?
 C23 C24 C25 120.8(5) . . ?
 C23 C24 H24 119.6 . . ?
 C21 C20 H20 119.6 . . ?
 C19 C20 C21 120.7(4) . . ?
 C19 C20 H20 119.6 . . ?
 C18 C19 H19 119.7 . . ?
 C20 C19 C18 120.5(4) . . ?
 C20 C19 H19 119.7 . . ?
 C21 C23 H23 120.3 . . ?
 C24 C23 C21 119.3(4) . . ?
 C24 C23 H23 120.3 . . ?
 C6 C7 H7 119.8 . . ?
 C8 C7 C6 120.5(4) . . ?
 C8 C7 H7 119.8 . . ?
 O2 C16 H16A 109.5 . . ?
 O2 C16 H16B 109.5 . . ?
 O2 C16 H16C 109.5 . . ?
 H16A C16 H16B 109.5 . . ?
 H16A C16 H16C 109.5 . . ?
 H16B C16 H16C 109.5 . . ?

loop_
  _geom_torsion_atom_site_label_1
  _geom_torsion_atom_site_label_2
  _geom_torsion_atom_site_label_3
  _geom_torsion_atom_site_label_4
  _geom_torsion
  _geom_torsion_site_symmetry_1
  _geom_torsion_site_symmetry_2
  _geom_torsion_site_symmetry_3
  _geom_torsion_site_symmetry_4
  _geom_torsion_publ_flag
 Ir1 N2 C25 C26 16.7(4) . . . . ?
 Ir1 N2 C25 C24 -163.0(4) . . . . ?
 Ir1 N2 C22 C17 -24.3(5) . . . . ?
 Ir1 N2 C22 C21 158.5(3) . . . . ?
 Ir1 N1 C9 C10 12.2(4) . . . . ?
 Ir1 N1 C9 C8 -171.2(3) . . . . ?
 Ir1 N1 C1 C2 -13.2(5) . . . . ?
 Ir1 N1 C1 C6 171.6(3) . . . . ?
 Ir1 N3 C33 C34 -45.0(4) . . . . ?
 Ir1 N4 C34 C33 -42.3(4) . . . . ?
 Ir1 C11 C10 C9 -17.1(4) . . . . ?
 Ir1 C11 C10 C15 168.3(3) . . . . ?
 Ir1 C11 C12 C13 -169.0(3) . . . . ?
 Ir1 C27 C26 C25 -7.6(5) . . . . ?
 Ir1 C27 C26 C31 175.2(3) . . . . ?
 Ir1 C27 C28 C29 -175.9(3) . . . . ?
 O1 C29 C30 C31 178.9(4) . . . . ?
 O1 C29 C28 C27 -178.8(4) . . . . ?
 N2 C25 C26 C27 -6.3(5) . . . . ?
 N2 C25 C26 C31 170.8(4) . . . . ?
 N2 C25 C24 C23 0.4(7) . . . . ?
 N2 C22 C17 C18 177.6(4) . . . . ?
 N2 C22 C21 C20 -176.7(4) . . . . ?
 N2 C22 C21 C23 6.7(7) . . . . ?
 O2 C13 C12 C11 -178.6(4) . . . . ?
 O2 C13 C14 C15 175.7(4) . . . . ?
 N1 C9 C8 C7 -3.3(7) . . . . ?
 N1 C1 C2 C3 179.8(4) . . . . ?
 N1 C1 C6 C5 -180.0(4) . . . . ?
 N1 C1 C6 C7 2.2(6) . . . . ?
 N3 C33 C34 N4 58.2(4) . . . . ?
 C11 C10 C9 N1 2.8(5) . . . . ?
 C11 C10 C9 C8 -173.7(4) . . . . ?
 C11 C10 C15 C14 3.1(7) . . . . ?
 C25 N2 C22 C17 163.5(4) . . . . ?
 C25 N2 C22 C21 -13.7(6) . . . . ?
 C25 C26 C31 C30 -175.3(4) . . . . ?
 C25 C24 C23 C21 -7.6(8) . . . . ?
 C27 C26 C31 C30 1.7(7) . . . . ?
 C29 C30 C31 C26 -0.6(7) . . . . ?
 C22 N2 C25 C26 -170.1(3) . . . . ?
 C22 N2 C25 C24 10.2(6) . . . . ?
 C22 C17 C18 C19 0.7(7) . . . . ?
 C22 C21 C20 C19 -2.6(8) . . . . ?
 C22 C21 C23 C24 4.0(8) . . . . ?
 C10 C11 C12 C13 4.0(6) . . . . ?
 C10 C9 C8 C7 173.0(4) . . . . ?
 C10 C15 C14 C13 1.4(7) . . . . ?
 C26 C25 C24 C23 -179.3(5) . . . . ?
 C26 C27 C28 C29 0.4(6) . . . . ?
 C9 N1 C1 C2 168.0(4) . . . . ?
 C9 N1 C1 C6 -7.2(5) . . . . ?
 C9 C10 C15 C14 -171.0(4) . . . . ?
 C9 C8 C7 C6 -2.0(7) . . . . ?
 C12 C11 C10 C9 168.9(4) . . . . ?
 C12 C11 C10 C15 -5.7(6) . . . . ?
 C12 C13 C14 C15 -3.2(7) . . . . ?
 C17 C22 C21 C20 6.0(7) . . . . ?
 C17 C22 C21 C23 -170.6(4) . . . . ?
 C17 C18 C19 C20 2.8(8) . . . . ?
 C21 C22 C17 C18 -5.1(6) . . . . ?
 C21 C20 C19 C18 -1.8(8) . . . . ?
 C1 N1 C9 C10 -168.8(3) . . . . ?
 C1 N1 C9 C8 7.8(6) . . . . ?
 C1 C2 C3 C4 2.3(7) . . . . ?
 C1 C6 C5 C4 -2.2(7) . . . . ?
 C1 C6 C7 C8 2.4(7) . . . . ?
 C30 C29 C28 C27 0.7(7) . . . . ?
 C28 C27 C26 C25 175.6(4) . . . . ?
 C28 C27 C26 C31 -1.6(6) . . . . ?
 C28 C29 C30 C31 -0.6(7) . . . . ?
 C15 C10 C9 N1 177.1(4) . . . . ?
 C15 C10 C9 C8 0.6(7) . . . . ?
 C14 C13 C12 C11 0.4(7) . . . . ?
 C2 C1 C6 C5 4.7(6) . . . . ?
 C2 C1 C6 C7 -173.1(4) . . . . ?
 C6 C1 C2 C3 -4.9(6) . . . . ?
 C6 C5 C4 C3 -0.5(7) . . . . ?
 C5 C6 C7 C8 -175.3(4) . . . . ?
 C5 C4 C3 C2 0.4(7) . . . . ?
 C32 O1 C29 C30 8.9(7) . . . . ?
 C32 O1 C29 C28 -171.6(4) . . . . ?
 C24 C25 C26 C27 173.4(4) . . . . ?
 C24 C25 C26 C31 -9.5(7) . . . . ?
 C20 C21 C23 C24 -172.4(5) . . . . ?
 C23 C21 C20 C19 173.8(5) . . . . ?
 C7 C6 C5 C4 175.6(5) . . . . ?
 C16 O2 C13 C12 -165.8(4) . . . . ?
 C16 O2 C13 C14 15.3(7) . . . . ?

_smtbx_masks_special_details       ?
loop_
  _smtbx_masks_void_nr
  _smtbx_masks_void_average_x
  _smtbx_masks_void_average_y
  _smtbx_masks_void_average_z
  _smtbx_masks_void_volume
  _smtbx_masks_void_count_electrons
  _smtbx_masks_void_content
 1 -0.669 0.000 0.000 276.6 109.6 ?
 2 0.000 0.500 0.000 9.5 0.0 ?

_shelx_res_file
;
TITL a23061303a0229_a.res in P-1
    a23061303a0229.res
    created by SHELXL-2018/3 at 10:33:31 on 24-Aug-2023
REM Old TITL exp_3482 in P1 #1
REM SHELXT solution in P-1: R1 0.079, Rweak 0.011, Alpha 0.063
REM <I/s> 0.000 for 0 systematic absences, Orientation as input
REM Formula found by SHELXT: C35 N4 O2 F6 P Cl3 Ir
CELL 1.54184 10.6791 12.5175 13.817 81.202 84.247 82.229
ZERR 2 0.0003 0.0004 0.0004 0.002 0.002 0.002
LATT 1
SFAC C H F Ir N O P
UNIT 68 64 12 2 8 4 2
DFIX 2.1 H17 H3a
DFIX 2.1 H3a H17
DFIX 2.4 H2 H4a

L.S. 105
PLAN  2
TEMP -123.16
CONF
BOND
list 4
ABIN
MORE -1
BOND $H
fmap 2
acta
REM <olex2.extras>
REM <HklSrc "%.\\a23061303a0229.hkl">
REM </olex2.extras>

WGHT    0.034100
FVAR       0.35005
IR1   4    0.392487    0.316849    0.294468    11.00000    0.03354    0.02672 =
         0.02871   -0.00623   -0.00039   -0.00435
P1    7    0.748649    0.270174   -0.066654    11.00000    0.04057    0.03644 =
         0.04114   -0.00697    0.00473   -0.00442
F2    3    0.839052    0.165350   -0.093824    11.00000    0.05594    0.04405 =
         0.07156   -0.01587    0.00928    0.00214
F1    3    0.657325    0.375789   -0.039513    11.00000    0.05249    0.04374 =
         0.07530   -0.01252    0.02007   -0.00021
F6    3    0.868093    0.336299   -0.072870    11.00000    0.04780    0.05520 =
         0.07133   -0.01629    0.00197   -0.01219
O1    6    0.816318    0.202446    0.481783    11.00000    0.04295    0.03977 =
         0.05256   -0.01055   -0.01377   -0.00058
F3    3    0.733829    0.312094   -0.180588    11.00000    0.06780    0.07081 =
         0.04377   -0.00230   -0.00467   -0.00724
N2    5    0.320091    0.169646    0.301755    11.00000    0.03796    0.02797 =
         0.03016   -0.00566   -0.00121   -0.00850
F4    3    0.629137    0.204950   -0.060488    11.00000    0.05138    0.05633 =
         0.08830   -0.01773    0.00876   -0.01966
F5    3    0.760896    0.230797    0.047849    11.00000    0.09722    0.06552 =
         0.04390    0.00003   -0.00309   -0.00474
O2    6    0.090544    0.270632    0.629540    11.00000    0.05409    0.06292 =
         0.04217   -0.01484    0.01453   -0.01755
N1    5    0.469356    0.459630    0.302496    11.00000    0.04163    0.02152 =
         0.03539   -0.00366   -0.00431   -0.00681
N3    5    0.257543    0.428945    0.202729    11.00000    0.03742    0.03157 =
         0.03593   -0.00546   -0.00488   -0.00086
AFIX  23
H3A   2    0.177563    0.428312    0.232378    11.00000   -1.20000
H3B   2    0.277996    0.498054    0.196547    11.00000   -1.20000
AFIX   0
N4    5    0.460040    0.282263    0.142600    11.00000    0.04405    0.03469 =
         0.03344   -0.00691   -0.00061   -0.00613
AFIX  23
H4A   2    0.545889    0.280117    0.133696    11.00000   -1.20000
H4B   2    0.439349    0.216354    0.134007    11.00000   -1.20000
AFIX   0
C11   1    0.301874    0.357713    0.420008    11.00000    0.03368    0.03713 =
         0.02633   -0.00853    0.00079   -0.00263
C25   1    0.406671    0.080958    0.320167    11.00000    0.04211    0.03111 =
         0.03567   -0.00692    0.00293   -0.00600
C27   1    0.528641    0.215456    0.360785    11.00000    0.03631    0.03081 =
         0.03159   -0.00347    0.00250   -0.00223
C29   1    0.723048    0.163650    0.441227    11.00000    0.03748    0.03729 =
         0.03543   -0.00825   -0.00339   -0.00337
C22   1    0.200065    0.154010    0.279623    11.00000    0.03936    0.04192 =
         0.03079   -0.00245    0.00000   -0.01263
C10   1    0.304869    0.467777    0.430884    11.00000    0.04156    0.03625 =
         0.03473   -0.01041   -0.00343    0.00051
C26   1    0.521056    0.103974    0.358747    11.00000    0.03850    0.03185 =
         0.03548   -0.00865    0.00058   -0.00550
C9    1    0.401145    0.521282    0.366146    11.00000    0.04264    0.03054 =
         0.03516   -0.00714   -0.00736    0.00165
C13   1    0.155042    0.341403    0.564667    11.00000    0.03871    0.05275 =
         0.03372   -0.01031    0.00177   -0.00911
C12   1    0.228937    0.295065    0.489953    11.00000    0.04183    0.04251 =
         0.03234   -0.00995   -0.00154   -0.00755
AFIX  43
H12   2    0.229824    0.219760    0.486434    11.00000   -1.20000
AFIX   0
C17   1    0.099116    0.236843    0.284895    11.00000    0.04038    0.04421 =
         0.03393   -0.00069    0.00036   -0.01102
AFIX  43
H17   2    0.112119    0.302930    0.306074    11.00000   -1.20000
AFIX   0
C21   1    0.177662    0.052422    0.255724    11.00000    0.04879    0.04297 =
         0.04078   -0.00810   -0.00404   -0.01509
C1    1    0.577174    0.496941    0.250442    11.00000    0.03881    0.03039 =
         0.03338   -0.00119   -0.00806   -0.00607
C33   1    0.262080    0.394901    0.104079    11.00000    0.04408    0.04359 =
         0.02826   -0.00417   -0.00733   -0.00811
AFIX  23
H33A  2    0.220291    0.454169    0.057856    11.00000   -1.20000
H33B  2    0.217664    0.329726    0.107811    11.00000   -1.20000
AFIX   0
C30   1    0.716606    0.053651    0.437595    11.00000    0.04229    0.03564 =
         0.04696   -0.00255   -0.00616    0.00270
AFIX  43
H30   2    0.780588   -0.000461    0.463389    11.00000   -1.20000
AFIX   0
C28   1    0.629799    0.243048    0.402483    11.00000    0.04091    0.03066 =
         0.03467   -0.00801   -0.00222   -0.00481
AFIX  43
H28   2    0.635989    0.317595    0.404821    11.00000   -1.20000
AFIX   0
C15   1    0.227394    0.513936    0.504851    11.00000    0.04351    0.03786 =
         0.04424   -0.01700   -0.00479    0.00003
AFIX  43
H15   2    0.227008    0.588897    0.509601    11.00000   -1.20000
AFIX   0
C14   1    0.151388    0.452202    0.571141    11.00000    0.04299    0.05387 =
         0.03999   -0.01991    0.00068   -0.00123
AFIX  43
H14   2    0.097347    0.484411    0.620474    11.00000   -1.20000
AFIX   0
C2    1    0.664047    0.428314    0.197912    11.00000    0.04342    0.03689 =
         0.03667   -0.00293   -0.00150   -0.00797
AFIX  43
H2    2    0.648738    0.355233    0.198269    11.00000   -1.20000
AFIX   0
C6    1    0.606601    0.603303    0.255549    11.00000    0.04572    0.03361 =
         0.04098    0.00055   -0.01175   -0.00854
C5    1    0.718001    0.638373    0.200982    11.00000    0.05011    0.04149 =
         0.04599   -0.00267   -0.00756   -0.01544
AFIX  43
H5    2    0.737026    0.710143    0.202030    11.00000   -1.20000
AFIX   0
C31   1    0.616466    0.024550    0.396203    11.00000    0.04766    0.02899 =
         0.05078   -0.00455   -0.00554   -0.00546
AFIX  43
H31   2    0.611911   -0.050077    0.392965    11.00000   -1.20000
AFIX   0
C4    1    0.797030    0.571266    0.147773    11.00000    0.04936    0.05229 =
         0.03821    0.00115   -0.00811   -0.02228
AFIX  43
H4    2    0.870400    0.596300    0.111543    11.00000   -1.20000
AFIX   0
C3    1    0.770544    0.463857    0.146020    11.00000    0.04072    0.04781 =
         0.03801   -0.00327   -0.00079   -0.01021
AFIX  43
H3    2    0.826309    0.416550    0.109045    11.00000   -1.20000
AFIX   0
C34   1    0.399547    0.369476    0.069509    11.00000    0.04914    0.03900 =
         0.03049   -0.00331   -0.00156   -0.00739
AFIX  23
H34A  2    0.406826    0.344507    0.004336    11.00000   -1.20000
H34B  2    0.442781    0.435638    0.063279    11.00000   -1.20000
AFIX   0
C32   1    0.922380    0.127588    0.510083    11.00000    0.04230    0.04633 =
         0.05169   -0.00496   -0.01007   -0.00097
AFIX 137
H32A  2    0.964543    0.096766    0.452470    11.00000   -1.50000
H32B  2    0.894114    0.068931    0.559413    11.00000   -1.50000
H32C  2    0.981916    0.165241    0.537961    11.00000   -1.50000
AFIX   0
C18   1   -0.018952    0.224187    0.259869    11.00000    0.04033    0.05760 =
         0.04522    0.00215   -0.00534   -0.00798
AFIX  43
H18   2   -0.086714    0.281460    0.263045    11.00000   -1.20000
AFIX   0
C8    1    0.427856    0.627456    0.371934    11.00000    0.05226    0.03234 =
         0.04400   -0.01113   -0.00706   -0.00300
AFIX  43
H8    2    0.375883    0.670703    0.414780    11.00000   -1.20000
AFIX   0
C24   1    0.384328   -0.022288    0.302102    11.00000    0.04852    0.03411 =
         0.06149   -0.01267   -0.00197   -0.00860
AFIX  43
H24   2    0.446261   -0.083347    0.316041    11.00000   -1.20000
AFIX   0
C20   1    0.055494    0.041718    0.228589    11.00000    0.05550    0.05173 =
         0.04924   -0.00892   -0.00459   -0.02221
AFIX  43
H20   2    0.040077   -0.024897    0.209730    11.00000   -1.20000
AFIX   0
C19   1   -0.038876    0.125174    0.229320    11.00000    0.04102    0.06540 =
         0.05509   -0.00362   -0.01218   -0.01909
AFIX  43
H19   2   -0.119282    0.117457    0.209192    11.00000   -1.20000
AFIX   0
C23   1    0.275887   -0.035539    0.265191    11.00000    0.05835    0.03936 =
         0.05512   -0.01638   -0.00157   -0.01500
AFIX  43
H23   2    0.265699   -0.103255    0.245787    11.00000   -1.20000
AFIX   0
C7    1    0.526830    0.667562    0.316861    11.00000    0.06380    0.02838 =
         0.04791   -0.00744   -0.01052   -0.00792
AFIX  43
H7    2    0.542752    0.739864    0.319542    11.00000   -1.20000
AFIX   0
C16   1   -0.009425    0.314710    0.694618    11.00000    0.04666    0.08357 =
         0.04184   -0.02045    0.01458   -0.01344
AFIX 137
H16A  2   -0.068571    0.367465    0.656465    11.00000   -1.50000
H16B  2    0.026560    0.351089    0.741419    11.00000   -1.50000
H16C  2   -0.054643    0.255727    0.730485    11.00000   -1.50000
AFIX   0
HKLF 4


REM  a23061303a0229_a.res in P-1
REM wR2 = 0.0807, GooF = S = 1.037, Restrained GooF = 1.095 for all data
REM R1 = 0.0329 for 6429 Fo > 4sig(Fo) and 0.0362 for all 6987 data
REM 435 parameters refined using 3 restraints

END

WGHT      0.0341      0.0000

REM Highest difference peak  1.510,  deepest hole -0.714,  1-sigma level  0.115
Q1    1   0.4068  0.3783  0.2632  11.00000  0.05    1.51
Q2    1   0.3817  0.2502  0.3230  11.00000  0.05    1.40
;
_shelx_res_checksum                9632
_shelx_hkl_file
;
   0   0  -1   20.45    3.81
   0   0  -1   20.36    3.42
   0   0  -2 1051.11   45.87
   0   0  -2 1144.30   48.90
   0   0  -3 2796.48  105.78
   0   0  -4 1297.72   68.73
   0   0  -5 1986.97   98.60
   0   0   6    7.00    6.08
   0   0   7  671.17   48.70
   0   0   8  980.28   63.63
   0   0   9 1052.40   69.43
   0   0  10  390.19   41.66
   0   0 -10  363.60   21.65
   0   0  11    0.14    4.67
   0   0  11   -0.28    2.36
   0   0  12  305.07   21.97
   0   0  13   61.60    8.63
   0   0  14  252.79   17.00
   0   0  15  214.52   13.51
   0   0 -15  226.48   14.39
   0   0  16    4.30    1.55
   0   0 -16    7.61    2.57
   0  -1  16  164.74    9.20
   0   1 -16  182.95   10.34
   0  -1  15  159.59   11.47
   0   1 -15  196.98   12.75
   0  -1  14    0.42    1.75
   0  -1  13  211.93   17.02
   0  -1  12   18.84    5.12
   0  -1  11  586.07   53.40
   0  -1  11  525.27   31.07
   0  -1  10  218.42   31.39
   0  -1  10  190.63   17.20
   0  -1   9  116.84   20.98
   0  -1   8 1144.56   69.55
   0  -1   7   10.04    3.70
   0  -1   6 2587.03  106.40
   0  -1   5  351.53   29.00
   0  -1   4  651.21   37.33
   0   1  -4  571.79   42.55
   0  -1   3 1788.05   69.74
   0   1  -3 2170.28   84.31
   0  -1   2  733.97   32.41
   0   1  -2  803.42   40.18
   0   1  -1 4307.69  129.22
   0  -1   1 4219.68  120.89
   0   1   0  356.33   16.42
   0  -1  -1 1158.41   41.91
   0  -1  -2 5367.88  165.48
   0  -1  -3 2424.23   94.76
   0  -1  -4   56.90   13.79
   0  -1  -5  247.00   30.22
   0  -1  -6 3590.88  154.27
   0  -1  -7  105.78   23.13
   0   1   7  112.99   19.48
   0   1   8  142.32   22.48
   0   1   9  464.26   43.64
   0   1  10  103.44   20.96
   0   1  11  648.62   56.51
   0  -1 -11  610.46   29.67
   0   1  12  147.65   14.68
   0   1  13  167.52   14.81
   0   1  14  259.42   17.10
   0  -1 -14  277.73   18.13
   0   1  15   23.88    4.17
   0  -1 -15   32.64    5.34
   0  -1 -16  127.11    9.10
   0  -1 -17    3.19    1.16
   0  -2  16   74.78    5.55
   0   2 -16   90.40    6.45
   0  -2  15    1.67    1.36
   0  -2  14  212.84   15.15
   0  -2  13    3.73    4.01
   0  -2  12  264.89   20.34
   0  -2  11  393.48   26.07
   0  -2  11  452.26   46.11
   0   2 -10  129.08   12.78
   0  -2  10  128.70   23.64
   0  -2  10  129.02   14.19
   0   2  -9 1222.62   48.02
   0  -2   9 1253.04   75.93
   0  -2   9 1088.95   50.10
   0   2  -9 1156.24   47.28
   0  -2   8   -1.43    5.65
   0  -2   7  306.75   31.48
   0  -2   6  774.36   48.83
   0   2  -6  689.28   58.55
   0  -2   5 1192.63   59.19
   0   2  -5 1091.83   70.41
   0  -2   4 1679.81   69.00
   0   2  -4 1519.69   81.45
   0  -2   3  927.14   42.90
   0   2  -3  949.32   54.67
   0  -2   2  196.30   14.31
   0   2  -2  200.12   20.72
   0  -2   1  190.17   11.42
   0   2  -1  180.84   16.98
   0   2   0 1538.43   55.74
   0  -2   0 1486.40   45.86
   0   2   1   77.16    8.45
   0  -2  -1   81.52    8.54
   0  -2  -2  307.14   22.41
   0  -2  -3 2305.51   91.88
   0  -2  -4  560.51   41.79
   0  -2  -5 2616.22  116.81
   0  -2  -6  482.63   46.11
   0  -2  -7   -4.52   11.39
   0   2   8 1432.28   79.36
   0   2   9    2.31    5.71
   0   2  10  398.16   42.18
   0   2  11  406.81   44.03
   0   2  12  152.11   14.35
   0   2  13  207.01   16.25
   0  -2 -13  217.02   16.74
   0   2  14   23.72    5.07
   0  -2 -14   19.52    4.70
   0  -2 -15  176.41   12.82
   0  -2 -16   63.57    6.27
   0  -2 -17  110.43    6.61
   0   3 -16    7.73    1.75
   0  -3  15  121.65    8.89
   0  -3  14   38.83    6.19
   0   3 -14   32.36    4.86
   0  -3  13  100.33   11.18
   0  -3  12  167.57   15.56
   0   3 -11   75.35    9.67
   0  -3  11   52.34    9.08
   0   3 -10  453.81   26.14
   0  -3  10  479.51   46.59
   0  -3  10  428.93   27.57
   0   3  -9  562.16   29.81
   0  -3   9  642.07   52.18
   0  -3   9  549.98   31.88
   0   3  -9  584.43   29.92
   0  -3   8 1641.34   86.84
   0  -3   7  374.73   35.08
   0   3  -6  228.37   34.40
   0  -3   6  222.65   24.65
   0   3  -5  880.87   66.13
   0  -3   5 1029.55   53.77
   0  -3   4  162.62   17.61
   0   3  -4  143.13   23.56
   0   3  -3  751.78   51.60
   0  -3   3  760.24   37.94
   0   3  -2 1946.67   86.54
   0  -3   2 2019.11   69.13
   0   3  -1  254.87   23.20
   0  -3   1  227.69   13.70
   0   3   0 2457.84   89.33
   0   3   1   14.28    5.34
   0  -3  -1    9.85    3.08
   0  -3  -2 3638.18  125.13
   0  -3  -2 3820.57  124.84
   0  -3  -3  301.62   26.19
   0  -3  -3  266.24   23.66
   0  -3  -4  238.70   23.84
   0  -3  -4  199.36   24.23
   0  -3  -5  486.38   42.38
   0  -3  -6  132.15   24.25
   0  -3  -7 1499.80   93.55
   0  -3  -8   15.34    9.85
   0   3   8   41.61   12.95
   0   3   9  158.26   24.62
   0   3  10  376.55   40.89
   0   3  11  117.07   23.08
   0  -3 -11  130.00   13.09
   0  -3 -12  216.28   17.19
   0  -3 -13   84.92   10.35
   0  -3 -14  117.52   11.35
   0  -3 -15   55.06    6.91
   0  -3 -16   55.52    5.97
   0  -3 -17   84.66    5.61
   0  -4  15   69.44    6.01
   0  -4  14   94.11    8.77
   0  -4  13   74.18    9.10
   0  -4  12    1.36    2.53
   0   4 -11  196.13   16.14
   0  -4  11  207.58   17.76
   0   4 -10   69.57    9.43
   0  -4  10   65.00   10.08
   0  -4  10   63.53   17.19
   0   4  -9  414.72   24.85
   0  -4   9  435.28   26.97
   0   4  -8  464.27   25.90
   0  -4   8  367.61   37.69
   0  -4   8  445.27   27.26
   0   4  -8  421.10   24.34
   0  -4   7   10.73    4.75
   0   4  -7   17.29    9.29
   0   4  -6 1016.22   77.65
   0  -4   6  940.33   55.73
   0   4  -5    2.60    7.94
   0  -4   5    5.42    3.38
   0   4  -4  325.29   37.34
   0  -4   4  370.84   27.54
   0   4  -3 1060.67   67.00
   0  -4   3 1088.62   48.37
   0  -4   2 1107.45   44.79
   0   4  -2 1047.26   62.28
   0   4  -1   13.98    7.64
   0  -4   1   13.36    3.22
   0   4   0    8.90    5.42
   0  -4   0    7.58    3.49
   0   4   1 1113.02   54.19
   0  -4  -1 1214.84   50.08
   0  -4  -2  162.76   19.56
   0   4   2  180.85   17.93
   0  -4  -2  219.59   19.55
   0   4   3   35.89    8.03
   0  -4  -3   40.41   11.00
   0  -4  -3   26.92    7.09
   0  -4  -4 2040.59   92.07
   0  -4  -4 1987.25   88.52
   0  -4  -5   28.68   10.92
   0  -4  -5   17.30    4.97
   0  -4  -6 1392.76   83.47
   0  -4  -7   13.70   12.25
   0  -4  -8  233.41   36.12
   0   4   8  235.06   28.14
   0   4   9   18.31    9.16
   0  -4  -9   10.61    3.93
   0   4  10   48.98   13.97
   0  -4 -10   56.41    8.44
   0   4  11  460.88   46.22
   0  -4 -11  483.72   27.01
   0  -4 -11  442.81   26.35
   0  -4 -12   71.50    9.08
   0  -4 -12   61.59    8.84
   0  -4 -13  209.15   16.51
   0  -4 -14  126.23   11.91
   0  -4 -15   53.21    6.71
   0  -4 -16  146.80    9.64
   0  -5  15   21.51    2.83
   0  -5  14  211.48   12.62
   0  -5  13    1.19    1.80
   0  -5  12  191.89   15.79
   0   5 -11   13.70    4.85
   0  -5  11   12.02    4.55
   0   5 -10   48.25    7.97
   0  -5  10   42.05    8.25
   0   5  -9  404.70   24.94
   0  -5   9  373.57   25.36
   0   5  -8   11.24    3.86
   0   5  -8   13.02    5.00
   0  -5   8   17.51    5.30
   0   5  -7  426.87   24.87
   0   5  -7  394.58   50.96
   0  -5   7  416.35   25.84
   0   5  -7  388.94   23.19
   0   5  -6   81.00   20.91
   0  -5   6   89.40   15.81
   0   5  -5  748.34   65.95
   0  -5   5  914.17   50.48
   0   5  -4  796.73   64.44
   0  -5   4  877.99   45.75
   0   5  -3  185.71   28.00
   0  -5   3  228.52   19.16
   0  -5   2 1315.48   51.54
   0   5  -2 1272.33   74.70
   0  -5   1   73.05    8.07
   0   5  -1   70.07   14.88
   0   5   0 1247.53   66.68
   0  -5   0 1331.02   54.67
   0   5   1  327.23   29.23
   0  -5  -1  367.99   25.01
   0   5   2   58.69   11.29
   0  -5  -2   81.63   12.35
   0  -5  -2   65.57   12.87
   0   5   3 2400.33   94.14
   0  -5  -3 2469.01   97.92
   0  -5  -3 2330.33  101.39
   0  -5  -4    8.26    6.53
   0   5   4    5.80    3.51
   0  -5  -4    2.38    6.35
   0  -5  -5  458.68   41.68
   0  -5  -5  583.76   45.32
   0  -5  -6 1099.08   66.58
   0  -5  -6  794.24   61.73
   0  -5  -7  351.06   41.75
   0   5   8  632.69   47.79
   0  -5  -8  474.40   52.61
   0  -5  -9    1.04    2.12
   0   5   9   -3.65    6.54
   0  -5  -9   -0.39    1.94
   0  -5  -9    0.12    3.20
   0   5  10  857.73   62.65
   0  -5 -10  866.68   36.92
   0  -5 -10  874.35   40.19
   0   5  11   43.09   13.10
   0  -5 -11   33.78    6.82
   0  -5 -11   29.46    6.14
   0  -5 -12  129.22   12.67
   0  -5 -12  118.23   12.54
   0  -5 -13  399.06   22.32
   0  -5 -13  368.75   22.71
   0  -5 -14   45.22    6.57
   0  -5 -15  206.95   12.55
   0  -5 -15  210.46   13.52
   0  -5 -16   84.98    6.81
   0  -6  14    2.18    1.38
   0   6 -14   -0.75    0.89
   0  -6  13  160.29   11.47
   0  -6  12   49.64    7.07
   0   6 -11   87.19   10.25
   0  -6  11   81.02   10.15
   0   6 -10  348.41   22.60
   0  -6  10  324.15   22.45
   0   6  -9    1.31    2.23
   0  -6   9    2.57    2.42
   0   6  -8  569.25   31.03
   0  -6   8  585.79   31.87
   0   6  -7  291.33   20.28
   0   6  -7  265.67   43.88
   0  -6   7  255.57   19.62
   0   6  -7  245.28   17.66
   0   6  -6  589.64   30.62
   0  -6   6  602.69   31.35
   0   6  -5  469.57   52.82
   0   6  -4   -1.05    7.94
   0   6  -3 1352.12   86.35
   0   6  -2  257.01   32.37
   0   6  -1 1379.38   78.78
   0   6   0 1207.25   69.02
   0   6   1   56.76   12.68
   0  -6  -2  879.89   56.39
   0   6   2  953.61   55.17
   0  -6  -3  108.33   18.34
   0   6   3  138.80   18.88
   0  -6  -4  826.14   56.80
   0   6   4  871.07   50.66
   0  -6  -5 1527.68   81.54
   0   6   5 1580.59   73.18
   0  -6  -5 1403.66   80.82
   0  -6  -6  369.06   38.48
   0  -6  -6  365.04   39.24
   0  -6  -7 1598.67   95.77
   0   6   7 1598.10   79.00
   0  -6  -8    7.44    2.99
   0   6   8    6.39    4.76
   0  -6  -8    6.90    3.87
   0  -6  -9  580.37   28.95
   0   6   9  615.56   49.15
   0  -6  -9  616.97   32.68
   0  -6  -9  612.36   28.96
   0  -6  -9  586.97   31.15
   0   6  10  325.39   35.75
   0  -6 -10  248.92   17.15
   0  -6 -10  304.56   21.47
   0  -6 -10  296.22   20.65
   0  -6 -11  254.02   19.12
   0  -6 -11  234.06   18.57
   0  -6 -12  210.00   16.62
   0  -6 -12  188.68   15.96
   0  -6 -13    3.66    2.53
   0  -6 -13    6.67    2.80
   0  -6 -13    7.70    3.70
   0  -6 -14  251.91   15.65
   0  -6 -14  248.34   15.00
   0  -6 -14  222.86   15.40
   0  -6 -15  102.67    7.98
   0  -6 -15  106.76    8.76
   0  -7  13   71.48    6.42
   0  -7  12   72.33    7.78
   0   7 -11  210.05   15.41
   0  -7  11  202.17   15.19
   0   7 -10   -0.41    2.42
   0  -7  10    1.07    2.15
   0   7  -9  197.59   16.88
   0  -7   9  232.81   18.26
   0   7  -8  174.16   15.89
   0  -7   8  175.34   15.89
   0   7  -7  236.73   18.53
   0  -7   7  244.11   18.99
   0   7  -6  311.74   21.32
   0  -7   6  308.08   21.10
   0   7  -6  283.94   44.40
   0   7  -5   40.59    7.08
   0   7  -5   39.48   16.79
   0  -7   5   36.20    6.75
   0   7  -4  497.41   54.63
   0   7  -3  453.55   49.78
   0   7  -2  808.31   64.80
   0   7  -1 1011.26   69.85
   0   7   0   44.58   11.99
   0   7   1  385.77   37.67
   0  -7  -2  119.68   20.30
   0   7   2  120.75   19.83
   0  -7  -3  313.97   34.48
   0   7   3  367.07   33.61
   0  -7  -4  781.85   57.47
   0  -7  -5  366.57   38.75
   0  -7  -6 1024.17   70.48
   0  -7  -7    6.93    3.29
   0  -7  -7    3.53    4.16
   0  -7  -7   -0.10    1.75
   0  -7  -7    2.11    2.32
   0  -7  -8  642.84   30.72
   0  -7  -8  661.07   34.00
   0  -7  -8  661.29   30.58
   0  -7  -8  665.40   34.63
   0  -7  -8  648.31   33.00
   0  -7  -9   82.04    9.58
   0  -7  -9   77.75   10.85
   0  -7  -9   82.77   11.27
   0  -7  -9   64.38    8.17
   0  -7  -9   80.80   10.27
   0  -7 -10  178.33   14.27
   0  -7 -10  166.09   15.43
   0  -7 -10  175.13   16.01
   0  -7 -10  133.88   12.08
   0  -7 -10  155.44   14.68
   0  -7 -11  404.96   25.26
   0  -7 -11  395.36   24.74
   0  -7 -11  387.57   24.36
   0  -7 -12    6.77    2.57
   0  -7 -12   11.61    4.04
   0  -7 -12    4.67    3.01
   0  -7 -13  451.75   24.08
   0  -7 -13  474.16   24.40
   0  -7 -13  447.84   24.39
   0  -7 -14   32.25    4.74
   0  -7 -14   35.93    5.33
   0  -7 -14   31.70    5.16
   0  -7 -15   66.95    5.95
   0  -8  13   11.70    2.10
   0  -8  12  187.74   11.32
   0  -8  11   -0.50    1.65
   0   8 -10  150.64   12.95
   0  -8  10  139.00   12.11
   0   8  -9   38.38    7.21
   0  -8   9   42.58    7.31
   0   8  -8  111.84   12.40
   0  -8   8  117.03   12.32
   0   8  -7  555.79   30.78
   0  -8   7  600.39   31.01
   0   8  -6    6.64    3.72
   0  -8   6    6.27    2.79
   0   8  -6    4.53    5.36
   0   8  -5  525.54   29.51
   0   8  -5  483.04   57.63
   0  -8   5  586.89   30.00
   0   8  -4  346.64   22.68
   0   8  -4  341.44   46.93
   0  -8   4  371.21   22.28
   0  -8   4  394.67   26.92
   0  -8   4  352.30   20.53
   0   8  -3   88.75   22.58
   0  -8   3   75.21   10.85
   0  -8   3   70.96    8.37
   0   8  -2  888.97   71.05
   0   8  -1   19.18   12.11
   0   8   0  477.29   46.98
   0   8   1  676.43   54.36
   0  -8  -2  898.35   63.30
   0   8   2  948.33   63.15
   0  -8  -3  213.68   29.45
   0  -8  -4   -3.61    3.33
   0  -8  -5 1041.52   41.46
   0  -8  -5 1009.92   44.15
   0  -8  -5  995.10   44.84
   0  -8  -5 1118.04   73.90
   0  -8  -6   79.02    8.91
   0  -8  -6   72.73   10.16
   0  -8  -6   78.39   10.09
   0  -8  -6   69.05   18.74
   0  -8  -7  499.08   25.91
   0  -8  -7  491.09   28.48
   0  -8  -7  509.96   29.69
   0  -8  -8  755.16   34.02
   0  -8  -8  739.43   36.90
   0  -8  -8  705.51   37.20
   0  -8  -9   38.88    6.81
   0  -8  -9   36.29    7.37
   0  -8  -9   25.01    5.25
   0  -8  -9   29.20    6.80
   0  -8 -10  749.11   33.27
   0  -8 -10  763.15   36.18
   0  -8 -10  765.44   37.42
   0  -8 -10  731.70   35.46
   0  -8 -11    5.06    3.34
   0  -8 -11   -1.30    3.11
   0  -8 -12  231.12   16.70
   0  -8 -12  226.89   17.12
   0  -8 -13   77.41    8.23
   0  -8 -13   60.36    7.61
   0  -8 -14   51.08    5.94
   0  -8 -14   57.83    6.34
   0  -8 -15  142.47    8.37
   0  -9  12   36.74    3.65
   0  -9  11  144.44    9.51
   0   9 -10  197.11   13.69
   0  -9  10  209.42   13.28
   0   9  -9   11.52    4.16
   0  -9   9    8.06    2.79
   0   9  -8  187.82   15.69
   0  -9   8  210.19   15.33
   0   9  -7    3.15    2.29
   0  -9   7    2.46    2.17
   0   9  -6  349.96   22.83
   0  -9   6  341.60   21.37
   0   9  -5   63.38    9.37
   0  -9   5   64.61    8.71
   0   9  -5   53.38   20.07
   0   9  -4  140.41   13.89
   0  -9   4  128.45   12.24
   0  -9   4  156.85   16.61
   0   9  -4  127.55   28.94
   0   9  -3  468.03   26.71
   0   9  -3  406.94   51.48
   0  -9   3  477.18   30.41
   0   9  -2   10.18    7.92
   0  -9   2    8.73    4.11
   0  -9   2   11.45    4.24
   0  -9   1  611.06   31.94
   0   9  -1  617.02   59.45
   0  -9   1  645.83   35.59
   0  -9   1  627.42   30.94
   0   9   0  234.19   33.90
   0  -9   0  221.63   17.56
   0  -9   0  223.97   16.60
   0  -9  -1  249.30   17.44
   0  -9  -1  304.93   35.92
   0  -9  -1  282.41   20.06
   0  -9  -1  287.20   19.09
   0  -9  -2  462.84   27.35
   0  -9  -2  521.72   48.17
   0  -9  -2  479.99   25.37
   0  -9  -3    4.67    3.13
   0  -9  -3    6.07    3.67
   0  -9  -3   -1.97    2.62
   0  -9  -3    3.21    4.16
   0  -9  -3    1.77    1.37
   0  -9  -4  804.78   38.96
   0  -9  -4  895.53   40.92
   0  -9  -4  734.52   37.27
   0  -9  -4  867.85   65.32
   0  -9  -4  830.56   36.08
   0  -9  -5   49.13    8.10
   0  -9  -5   39.41    7.61
   0  -9  -5   41.80    7.53
   0  -9  -5   48.61   15.73
   0  -9  -5   37.99    6.70
   0  -9  -6   36.33    6.79
   0  -9  -6   26.95    6.21
   0  -9  -6   49.45   14.78
   0  -9  -6   29.03    5.61
   0  -9  -7  801.82   35.36
   0  -9  -7  804.69   39.76
   0  -9  -7  757.51   38.02
   0  -9  -8    4.90    3.01
   0  -9  -8    2.45    2.06
   0  -9  -8   10.27    3.69
   0  -9  -9  221.31   15.72
   0  -9  -9  228.11   18.79
   0  -9  -9  210.97   17.37
   0  -9  -9  170.37   13.56
   0  -9 -10   22.36    5.03
   0  -9 -10   21.91    4.41
   0  -9 -10   19.08    5.15
   0  -9 -10   19.18    5.64
   0  -9 -10   16.87    4.77
   0  -9 -11  269.30   19.41
   0  -9 -11  279.82   18.80
   0  -9 -12  106.53   10.66
   0  -9 -12   92.60    9.66
   0  -9 -13   36.17    5.58
   0  -9 -13   47.08    6.00
   0  -9 -14  185.75   10.84
   0 -10  10    2.17    1.42
   0  10  -9  161.89   11.84
   0 -10   9  170.75   11.16
   0  10  -8   61.63    7.75
   0 -10   8   50.15    6.31
   0  10  -7   22.32    4.98
   0 -10   7   16.39    4.14
   0  10  -6    7.54    3.49
   0 -10   6    6.97    2.88
   0  10  -5   28.57    6.18
   0 -10   5   34.23    5.98
   0  10  -4  404.27   24.23
   0  10  -3   23.21    5.30
   0 -10   3   22.75    5.82
   0  10  -2  314.54   20.25
   0 -10   2  233.53   20.61
   0 -10   1  177.58   17.42
   0 -10   1  246.32   32.72
   0 -10   0   48.09    7.95
   0 -10   0   53.06    8.02
   0 -10  -1  439.48   26.87
   0 -10  -1  485.78   47.71
   0 -10  -1  428.78   24.30
   0 -10  -2    6.48    3.43
   0 -10  -2    3.04    2.49
   0 -10  -2   -2.16    6.36
   0 -10  -3  261.16   20.19
   0 -10  -3  283.59   18.68
   0 -10  -3  244.40   33.85
   0 -10  -4  156.31   15.12
   0 -10  -4  153.44   13.18
   0 -10  -4  133.58   13.91
   0 -10  -4  133.50   13.95
   0 -10  -4  179.07   29.75
   0 -10  -5  335.51   23.15
   0 -10  -5  334.48   20.47
   0 -10  -5  307.23   21.80
   0 -10  -5  311.98   22.56
   0 -10  -5  343.33   40.51
   0 -10  -6  271.60   20.31
   0 -10  -6  253.74   17.44
   0 -10  -6  255.63   20.10
   0 -10  -6  241.20   19.12
   0 -10  -7   22.54    5.74
   0 -10  -7   25.10    6.13
   0 -10  -7   31.83    7.08
   0 -10  -7   26.13    5.26
   0 -10  -8   40.75    7.15
   0 -10  -8   45.98    8.23
   0 -10  -8   41.69    7.22
   0 -10  -8   41.84    6.26
   0 -10  -9   24.81    5.92
   0 -10  -9   24.07    4.66
   0 -10  -9   19.94    5.35
   0 -10  -9   20.18    4.97
   0 -10  -9   17.21    4.10
   0 -10 -10  294.08   17.53
   0 -10 -10  311.35   16.58
   0 -10 -10  289.93   19.22
   0 -10 -10  270.86   19.46
   0 -10 -11  231.76   16.63
   0 -10 -11  210.73   15.17
   0 -10 -12   24.63    4.68
   0 -10 -12   23.21    4.63
   0 -10 -13  270.61   14.31
   0 -10 -14    9.27    2.01
   0 -11  10   89.70    5.73
   0 -11   9   48.55    4.31
   0  11  -8    5.27    2.13
   0 -11   8    9.67    2.21
   0  11  -7  222.99   14.76
   0 -11   7  247.87   13.72
   0  11  -6   16.74    3.62
   0  11  -5  175.73   13.84
   0  11  -4  154.14   13.15
   0  11  -3   99.24   10.39
   0  11  -2  423.08   22.93
   0 -11   2  395.19   22.79
   0 -11   1   31.67    6.51
   0 -11   1   29.14    5.73
   0 -11   0  352.75   21.49
   0 -11  -1   60.93    9.53
   0 -11  -1   53.27    7.89
   0 -11  -2  449.23   27.23
   0 -11  -2  431.36   24.35
   0 -11  -3  307.66   21.87
   0 -11  -3  278.97   18.79
   0 -11  -4  284.81   21.17
   0 -11  -4  303.10   19.35
   0 -11  -5  430.84   23.83
   0 -11  -5  447.70   26.99
   0 -11  -6   11.99    4.60
   0 -11  -6   13.68    4.07
   0 -11  -7  228.54   17.66
   0 -11  -7  212.04   15.35
   0 -11  -7  227.70   17.66
   0 -11  -7  214.76   17.72
   0 -11  -8   83.28    9.00
   0 -11  -8   89.62   10.23
   0 -11  -8   92.77   10.75
   0 -11  -8   86.05   10.78
   0 -11  -8   74.55    8.12
   0 -11  -9   93.27   10.02
   0 -11  -9  103.27    9.54
   0 -11  -9  110.66   11.33
   0 -11  -9  102.06    8.88
   0 -11  -9  100.88   11.24
   0 -11 -10  232.94   14.15
   0 -11 -10  229.42   14.54
   0 -11 -10  204.80   15.68
   0 -11 -10  219.15   15.28
   0 -11 -11    3.13    2.16
   0 -11 -12  166.19   10.74
   0 -12   8  179.35    9.56
   0  12  -7   -0.19    1.23
   0 -12   7    1.83    1.52
   0  12  -6  192.45   12.09
   0 -12   6  194.30   12.21
   0  12  -5  132.93   10.36
   0 -12   5  133.90   10.64
   0  12  -4  274.72   16.10
   0 -12   4  254.95   16.14
   0 -12   3  138.47   11.56
   0 -12   2    5.14    3.04
   0 -12   1  409.56   22.55
   0 -12   0    1.28    2.00
   0 -12  -1  267.73   17.74
   0 -12  -2  270.88   17.71
   0 -12  -3   22.02    5.34
   0 -12  -3   19.91    4.58
   0 -12  -4  373.99   21.11
   0 -12  -4  375.55   23.66
   0 -12  -5    2.46    2.99
   0 -12  -5    1.70    2.59
   0 -12  -6  345.23   19.59
   0 -12  -6  363.34   22.45
   0 -12  -7  155.01   13.32
   0 -12  -7  171.04   12.47
   0 -12  -8   54.52    7.44
   0 -12  -8   39.70    5.12
   0 -12  -8   44.06    5.88
   0 -12  -9  184.99   11.84
   0 -12  -9  166.40   12.20
   0 -12  -9  171.03   10.47
   0 -12 -10    0.73    1.42
   0 -13   7  191.38    8.93
   0 -13   6   22.70    3.09
   0 -13   5   87.17    7.02
   0 -13   4  135.75    9.72
   0 -13   3   21.09    3.95
   0 -13   2  296.61   16.68
   0 -13   1    9.37    2.97
   0 -13   0   83.47    8.66
   0 -13  -1  208.13   14.09
   0 -13  -2   27.45    4.95
   0 -13  -3  248.11   15.47
   0 -13  -4   53.81    6.67
   0 -13  -5  249.11   15.10
   0 -13  -5  274.46   17.67
   0 -13  -6  125.94    9.93
   0 -13  -6  136.70   11.66
   0 -13  -7  110.34    9.86
   0 -13  -7  127.44    9.53
   0 -13  -7  118.54    8.65
   0 -13  -8  264.25   15.03
   0 -13  -8  263.00   13.81
   0 -13  -8  255.59   12.59
   0 -13  -9    5.21    1.70
   0 -14   4   17.60    2.62
   0 -14   3  149.86    8.91
   0 -14   2   40.57    4.56
   0 -14   1  101.56    7.76
   0 -14   0  167.26   10.67
   0 -14  -1   10.11    2.66
   0 -14  -2  239.87   13.41
   0 -14  -3  157.73   10.34
   0 -14  -4  256.98   13.70
   0 -14  -5  102.70    7.75
   0 -14  -6   15.35    2.54
   0 -14  -6   17.74    3.04
   0 -14  -7  302.88   13.76
   0 -14  -8    8.74    1.89
   0 -15   1   94.76    5.78
   0 -15   0   -0.22    0.85
   0 -15  -1  154.86    8.30
   0 -15  -2   16.38    2.58
   0 -15  -3   67.48    5.16
   0 -15  -4  120.91    7.09
   0 -15  -5    1.68    1.00
   1 -15  -3    1.83    0.66
   1 -15  -2  171.81    8.25
   1 -14  -7   68.58    5.14
   1 -14  -6   54.33    4.86
   1 -14  -5  278.11   13.27
   1 -14  -4   29.14    3.89
   1 -14  -3  215.43   11.82
   1 -14  -2   92.44    7.28
   1 -14  -1   85.06    6.94
   1 -14   0  222.98   11.98
   1 -14   1    4.12    1.46
   1 -14   2  105.42    7.25
   1 -14   3   28.28    3.34
   1 -14   4   76.08    5.14
   1 -13  -9   53.75    5.47
   1 -13  -8  133.05    9.83
   1 -13  -8  124.25    8.32
   1 -13  -7   38.64    5.55
   1 -13  -7   34.62    4.53
   1 -13  -6  182.16   13.34
   1 -13  -6  203.08   12.26
   1 -13  -5   15.86    4.40
   1 -13  -5   15.38    3.48
   1 -13  -4  190.18   12.55
   1 -13  -4  206.10   14.89
   1 -13  -3  133.48   10.34
   1 -13  -2   85.33    8.23
   1 -13  -1  309.57   17.11
   1 -13   0   19.36    3.84
   1 -13   1  154.01   11.17
   1 -13   2  109.85    8.95
   1 -13   3   88.43    7.70
   1 -13   4   91.69    7.39
  -1  13  -5    0.60    1.50
   1 -13   5   -1.14    1.18
   1 -13   6  142.47    8.00
   1 -12 -11   19.50    2.78
   1 -12 -10   87.70    7.41
   1 -12  -9  179.30   12.36
   1 -12  -9  190.68   11.49
   1 -12  -8   -2.87    2.37
   1 -12  -8   -1.38    1.83
   1 -12  -7  251.54   15.04
   1 -12  -7  245.19   16.88
   1 -12  -6  152.34   11.75
   1 -12  -6  133.59   12.74
   1 -12  -5  267.67   18.82
   1 -12  -5  261.35   16.25
   1 -12  -4  281.69   17.40
   1 -12  -4  290.04   20.09
   1 -12  -3   28.24    5.58
   1 -12  -3   24.16    4.90
   1 -12  -2  444.73   25.99
   1 -12  -2  472.99   24.09
   1 -12  -1    3.08    3.00
   1 -12   0  191.55   16.48
   1 -12   0  191.23   14.19
   1 -12   1  105.80   12.27
   1 -12   1  129.88   11.23
  -1  12  -2   84.14    8.57
   1 -12   2   80.51    8.84
  -1  12  -3  270.85   16.38
   1 -12   3  257.03   16.19
  -1  12  -4   14.30    4.02
   1 -12   4   11.33    3.05
  -1  12  -5  307.09   16.93
   1 -12   5  314.79   16.79
  -1  12  -6   28.86    4.58
   1 -12   6   37.38    4.88
  -1  12  -7   21.31    3.41
   1 -12   7   21.77    3.25
   1 -12   8  108.97    6.74
   1 -11 -12   81.41    6.98
   1 -11 -11   32.12    4.36
   1 -11 -11   34.81    5.15
   1 -11 -10  210.00   13.87
   1 -11 -10  221.69   14.88
   1 -11  -9    2.61    1.91
   1 -11  -9    1.66    2.07
   1 -11  -9    1.98    1.77
   1 -11  -8  244.11   17.38
   1 -11  -8  236.51   15.34
   1 -11  -8  249.67   17.46
   1 -11  -7  115.40   12.22
   1 -11  -7  118.27   10.78
   1 -11  -7  125.04   12.39
   1 -11  -6  100.28   11.64
   1 -11  -6   92.71    9.62
   1 -11  -6   90.83   10.71
   1 -11  -5  149.39   12.72
   1 -11  -5  146.14   14.60
   1 -11  -4    4.93    3.51
   1 -11  -4   -1.11    2.59
   1 -11  -3  533.31   29.80
   1 -11  -3  497.73   26.20
   1 -11  -2   18.11    5.05
   1 -11  -2   22.04    5.19
   1 -11  -1  179.31   15.71
   1 -11  -1  135.14   15.10
   1 -11  -1  176.78   14.18
   1 -11   0  105.27   11.72
   1 -11   0   97.86   12.62
   1 -11   0  110.11   11.15
  -1  11  -1   68.50    8.36
   1 -11   1   53.59    8.97
   1 -11   1   66.28    8.58
  -1  11  -2  195.03   15.01
   1 -11   2  170.12   16.84
   1 -11   2  165.03   13.81
  -1  11  -3    1.60    1.85
   1 -11   3    1.97    2.11
  -1  11  -4   58.51    8.08
  -1  11  -5  120.47   11.31
  -1  11  -6  118.86   10.95
  -1  11  -7  123.18   10.30
  -1  11  -8    3.61    1.68
  -1  11  -9   55.80    5.57
   1 -10 -14   76.77    5.41
   1 -10 -13  104.83    7.95
   1 -10 -12    9.93    2.95
   1 -10 -11  220.85   14.11
   1 -10 -11  261.48   16.39
   1 -10 -10    1.04    1.77
   1 -10 -10    3.98    2.92
   1 -10 -10    2.04    2.20
   1 -10  -9  271.01   16.89
   1 -10  -9  269.10   18.38
   1 -10  -9  275.68   19.13
   1 -10  -9  245.80   19.14
   1 -10  -8   81.73    9.06
   1 -10  -8   78.44   10.05
   1 -10  -8   79.63   10.64
   1 -10  -8   71.20    9.62
   1 -10  -7   97.97   10.25
   1 -10  -7  108.00   12.25
   1 -10  -7   96.29   11.61
   1 -10  -7  102.81   12.60
   1 -10  -6  146.95   12.55
   1 -10  -6  141.48   14.25
   1 -10  -6  127.95   14.20
   1 -10  -6  136.57   13.64
   1 -10  -5   11.75    4.25
   1 -10  -5   14.85    4.30
   1 -10  -5   16.72    4.26
   1 -10  -4  210.65   17.79
   1 -10  -4  218.74   15.98
   1 -10  -4  201.70   16.90
   1 -10  -4  233.04   32.57
   1 -10  -3   53.24    7.57
   1 -10  -3   53.11   15.71
   1 -10  -3   55.63    8.54
   1 -10  -2  111.61   12.70
   1 -10  -2  108.54   20.98
   1 -10  -2   90.45   10.01
   1 -10  -2   97.10   12.78
   1 -10  -2  107.20   11.57
   1 -10  -1  348.88   22.90
   1 -10  -1  321.28   19.99
   1 -10  -1  353.73   21.82
   1 -10   0    4.46    3.63
   1 -10   0    1.11    1.44
   1 -10   0    0.34    2.69
   1 -10   0   -0.98    2.97
   1 -10   1  183.54   15.85
   1 -10   1  178.61   14.57
   1 -10   1  193.47   18.74
   1 -10   1  211.29   16.36
   1 -10   2  180.78   18.00
   1 -10   2  199.16   15.79
  -1  10  -3   54.61    8.07
   1 -10   3   56.14   10.16
  -1  10  -4  120.23   12.67
   1 -10   4  145.80   16.15
  -1  10  -5   22.34    5.64
  -1  10  -6  152.23   13.74
  -1  10  -7   36.50    6.50
   1 -10   7   30.59    4.79
  -1  10  -8  203.46   14.65
   1 -10   8  207.09   12.84
  -1  10  -9   64.20    7.17
   1 -10   9   65.25    6.04
  -1  10 -10   27.24    4.16
   1 -10  10   27.41    3.32
   1  -9 -14  140.03    8.89
   1  -9 -13   16.93    3.72
   1  -9 -12  300.20   18.05
   1  -9 -11   25.39    5.77
   1  -9 -11   23.65    5.70
   1  -9 -10  279.53   19.50
   1  -9 -10  261.78   19.82
   1  -9  -9  156.62   12.93
   1  -9  -9  153.20   14.63
   1  -9  -9  157.54   15.53
   1  -9  -8    6.72    3.76
   1  -9  -8    9.59    3.79
   1  -9  -8    4.35    2.44
   1  -9  -7  396.50   22.55
   1  -9  -7  405.77   26.57
   1  -9  -7  409.95   25.43
   1  -9  -6    4.65    2.78
   1  -9  -6    2.20    2.55
   1  -9  -6    4.44    2.26
   1  -9  -5  629.79   30.15
   1  -9  -5  627.92   34.29
   1  -9  -5  634.86   33.01
   1  -9  -5  709.68   58.24
   1  -9  -4  457.39   24.33
   1  -9  -4  508.94   47.95
   1  -9  -4  410.78   25.27
   1  -9  -4  435.41   27.16
   1  -9  -3  471.67   27.60
   1  -9  -3  463.97   24.79
   1  -9  -3  538.29   48.60
   1  -9  -3  416.25   25.43
   1  -9  -3  488.61   26.02
   1  -9  -2  316.12   21.83
   1  -9  -2  311.88   36.11
   1  -9  -2  317.45   19.69
   1  -9  -2  323.11   23.58
   1  -9  -2  323.91   20.57
   1  -9  -1   69.43   16.61
   1  -9  -1   52.14    7.43
   1  -9  -1   60.37    9.02
   1  -9  -1   57.52    9.95
   1  -9  -1   91.49   10.24
   1  -9   0  561.41   30.39
   1  -9   0  567.52   28.40
   1  -9   0  564.04   33.83
   1  -9   0  596.99   30.03
   1  -9   1  378.29   23.55
   1  -9   1  382.32   26.98
   1  -9   1  402.88   23.60
   1  -9   2  383.96   27.39
   1  -9   2  385.82   22.91
  -1   9  -3  593.45   60.78
   1  -9   3  613.11   35.74
   1  -9   3  586.67   29.43
  -1   9  -4   39.38    7.18
  -1   9  -4   27.50   12.14
   1  -9   4   39.38    8.79
   1  -9   4   38.75    6.28
  -1   9  -5  350.02   23.00
  -1   9  -6   57.98    8.92
   1  -9   6   58.15    7.70
  -1   9  -7  100.88   11.41
   1  -9   7   81.44    9.52
  -1   9  -8  104.43   11.19
   1  -9   8   89.24    9.37
  -1   9  -9   45.04    6.77
   1  -9   9   40.39    5.69
  -1   9 -10  261.33   15.78
   1  -9  10  263.21   14.68
   1  -9  11   11.44    2.46
   1  -8 -15  142.23    8.20
   1  -8 -14   15.29    3.18
   1  -8 -13  126.15   10.56
   1  -8 -12  122.19   11.93
   1  -8 -12  131.03   11.96
   1  -8 -11  199.87   16.55
   1  -8 -11  225.51   17.03
   1  -8 -10  265.34   19.55
   1  -8 -10  273.55   20.41
   1  -8  -9    6.48    3.60
   1  -8  -9    3.06    2.27
   1  -8  -9    3.66    2.13
   1  -8  -8  352.17   21.01
   1  -8  -8  358.90   23.73
   1  -8  -8  354.15   24.27
   1  -8  -7    2.39    3.36
   1  -8  -7    7.35    3.57
   1  -8  -7    4.46    2.38
   1  -8  -6  814.52   35.26
   1  -8  -6  785.03   38.10
   1  -8  -6  826.36   40.09
   1  -8  -5  632.82   29.60
   1  -8  -5  648.49   54.54
   1  -8  -5  610.95   33.20
   1  -8  -5  645.90   32.52
   1  -8  -4  107.69   20.78
   1  -8  -4   75.98    8.73
   1  -8  -4   88.62   10.88
   1  -8  -4   88.64   10.32
   1  -8  -3 1154.65   72.90
   1  -8  -2   98.86   19.32
   1  -8  -1 1074.84   68.00
   1  -8   0  231.04   28.38
  -1   8  -1  455.34   46.61
  -1   8  -2  950.00   72.90
   1  -8   2  923.85   45.52
   1  -8   2  933.94   39.58
  -1   8  -3  137.65   27.81
   1  -8   3  171.63   17.17
   1  -8   3  172.92   13.84
   1  -8   4  646.51   36.70
   1  -8   4  619.75   29.31
  -1   8  -5  215.40   17.42
   1  -8   5  200.01   15.85
   1  -8   5  241.86   21.13
  -1   8  -5  179.97   34.99
  -1   8  -6   24.11    6.43
   1  -8   6   22.31    5.54
  -1   8  -7  235.55   18.33
   1  -8   7  215.94   16.81
  -1   8  -8   35.53    6.76
   1  -8   8   34.60    6.09
  -1   8  -9  440.30   25.30
   1  -8   9  437.89   24.27
  -1   8 -10   34.51    5.87
   1  -8  10   32.02    5.57
  -1   8 -11   81.50    8.31
   1  -8  11   80.54    7.77
   1  -8  12  118.31    8.31
   1  -7 -15    2.23    1.33
   1  -7 -14  178.10   12.19
   1  -7 -13  116.49   10.70
   1  -7 -13  128.01   11.34
   1  -7 -13  124.72   11.29
   1  -7 -12  171.61   14.46
   1  -7 -12  153.61   13.74
   1  -7 -12  146.96   13.53
   1  -7 -11  307.27   21.22
   1  -7 -11  309.98   20.97
   1  -7 -10    7.53    3.86
   1  -7 -10    4.33    3.42
   1  -7  -9  995.30   40.90
   1  -7  -9  962.89   44.47
   1  -7  -9  956.54   43.00
   1  -7  -8   16.24    4.85
   1  -7  -8   11.53    4.41
   1  -7  -8   11.25    4.69
   1  -7  -7  186.94   14.29
   1  -7  -7  185.02   16.58
   1  -7  -7  186.77   15.88
   1  -7  -6  979.90   40.30
   1  -7  -6 1040.48   44.36
   1  -7  -6 1047.49   45.56
   1  -7  -5   43.22   13.05
   1  -7  -4 1035.45   66.92
   1  -7  -3    5.12    3.16
   1  -7  -2  465.83   40.84
   1  -7  -1  491.39   41.35
  -1   7   1  493.63   40.66
  -1   7   0  305.62   33.49
  -1   7  -1 1137.11   73.63
  -1   7  -2   16.71    7.18
  -1   7  -3 1417.36   91.65
   1  -7   4  373.02   25.76
  -1   7  -4  332.97   44.32
   1  -7   5  467.59   29.89
   1  -7   5  477.86   26.34
  -1   7  -6  558.54   30.37
   1  -7   6  552.52   29.74
  -1   7  -7   28.50    5.52
  -1   7  -7   26.57    6.27
   1  -7   7   31.56    6.90
  -1   7  -8  454.61   27.07
   1  -7   8  479.16   27.56
  -1   7  -9   89.77   10.91
   1  -7   9   91.98   10.96
  -1   7 -10  108.57   11.51
   1  -7  10  123.59   12.26
  -1   7 -11  311.60   19.01
   1  -7  11  315.26   19.13
   1  -7  12   18.06    3.93
   1  -7  13  146.63    9.43
   1  -6 -15  220.38   12.52
   1  -6 -15  236.46   13.13
   1  -6 -14  109.76    9.86
   1  -6 -14  115.57   10.26
   1  -6 -13   39.07    5.93
   1  -6 -13   41.54    6.78
   1  -6 -12  640.51   31.69
   1  -6 -12  653.28   32.43
   1  -6 -11   18.22    6.14
   1  -6 -11   21.13    5.81
  -1   6  10  374.57   39.91
   1  -6 -10  347.35   23.41
   1  -6 -10  362.39   23.36
   1  -6  -9  136.88   12.33
   1  -6  -9  113.80   27.14
  -1   6   9  114.16   21.04
   1  -6  -9  153.34   15.05
   1  -6  -9  126.14   13.03
   1  -6  -8  175.39   13.89
   1  -6  -8  154.45   29.92
   1  -6  -8  182.55   16.30
   1  -6  -8  176.55   15.17
   1  -6  -7 1160.22   83.92
   1  -6  -6   -0.05    3.95
   1  -6  -5  758.62   58.89
   1  -6  -5  618.10   50.24
   1  -6  -4  443.49   41.64
   1  -6  -4  453.49   40.31
   1  -6  -3 1316.97   70.58
   1  -6  -3 1045.76   65.56
  -1   6   2  360.56   29.05
   1  -6  -2  384.00   34.44
   1  -6  -1  122.42   18.17
   1  -6  -1  170.14   21.79
  -1   6   1  170.74   21.37
  -1   6   0 1610.65   77.81
   1  -6   0 1250.47   66.77
   1  -6   1  439.96   35.68
  -1   6  -1  524.35   44.30
  -1   6  -2  519.04   47.33
  -1   6  -3 1136.57   77.42
  -1   6  -4  368.47   44.02
  -1   6  -5  832.43   72.13
  -1   6  -6   12.13    3.56
  -1   6  -6   21.72    5.32
   1  -6   6   23.19    7.16
   1  -6   6   18.49    5.01
  -1   6  -7  543.00   28.58
  -1   6  -7  606.13   31.44
   1  -6   7  582.27   31.50
  -1   6  -8   88.10   11.08
   1  -6   8  104.80   12.22
  -1   6  -8   93.02   10.62
  -1   6  -9  244.06   18.92
   1  -6   9  265.14   20.30
  -1   6 -10  250.43   18.49
   1  -6  10  249.74   19.21
  -1   6 -11    3.53    2.47
   1  -6  11    2.86    2.16
   1  -6  12  208.75   15.14
   1  -6  13   35.76    5.44
   1  -6  14   61.87    5.57
   1  -5 -16   83.74    5.94
   1  -5 -16   94.31    6.74
   1  -5 -15  180.57   11.61
   1  -5 -15  179.28   11.79
   1  -5 -14   50.66    6.73
   1  -5 -13  217.72   16.38
   1  -5 -12    4.56    2.83
   1  -5 -12    4.11    3.66
  -1   5  11   90.43   20.57
   1  -5 -11   86.78   10.54
   1  -5 -11   94.90   11.41
  -1   5  10  547.65   49.41
   1  -5 -10  530.07   29.36
   1  -5 -10  500.90   28.29
   1  -5  -9  559.09   61.48
   1  -5  -9  570.83   31.13
   1  -5  -9  613.78   31.17
   1  -5  -8  294.33   42.47
   1  -5  -8  316.30   20.69
   1  -5  -7    0.54    8.54
   1  -5  -6 1913.09  106.41
   1  -5  -5  565.11   49.97
   1  -5  -5  463.55   41.01
   1  -5  -4  436.98   40.89
   1  -5  -4  449.65   38.26
   1  -5  -3  504.56   38.98
  -1   5   3  495.22   29.99
   1  -5  -3  520.04   42.44
   1  -5  -2  179.57   22.00
  -1   5   2  155.63   16.88
   1  -5  -2  197.06   22.64
   1  -5  -1 1729.71   77.09
  -1   5   1 1683.17   74.21
   1  -5  -1 1797.26   79.82
  -1   5   0   24.82    9.59
   1  -5   0   13.82    4.27
  -1   5  -1  843.17   54.92
   1  -5   1  950.19   44.22
  -1   5  -2  709.08   52.77
   1  -5   2  746.82   39.98
  -1   5  -3  436.50   43.06
   1  -5   3  344.88   26.97
  -1   5  -4  522.49   50.68
   1  -5   4  461.69   34.08
  -1   5  -5    6.58    6.50
   1  -5   5    1.06    2.81
   1  -5   6  312.08   30.93
  -1   5  -6  269.64   40.39
  -1   5  -7  699.49   33.60
  -1   5  -7  656.23   31.55
   1  -5   7  684.06   34.70
  -1   5  -8  278.46   19.99
  -1   5  -8  263.03   18.76
   1  -5   8  288.86   32.84
   1  -5   8  291.58   21.38
  -1   5  -9  196.72   16.49
   1  -5   9  184.20   16.84
  -1   5  -9  176.85   15.23
  -1   5 -10   49.92    7.76
   1  -5  10   47.39    8.12
  -1   5 -11  209.20   16.39
   1  -5  11  191.67   16.97
  -1   5 -12   68.23    8.32
   1  -5  12   74.64    9.88
   1  -5  13   64.47    7.70
   1  -5  14   52.20    5.99
   1  -5  15   -1.39    0.87
   1  -4 -16   39.24    4.19
   1  -4 -16   46.03    4.83
   1  -4 -15   19.15    3.73
   1  -4 -14  149.43   12.44
   1  -4 -13  140.04   13.12
   1  -4 -12  294.39   20.34
  -1   4  11  164.80   27.44
   1  -4 -11  223.58   16.98
   1  -4 -11  206.51   16.90
  -1   4  10   50.65   15.79
   1  -4 -10   54.16    8.22
   1  -4 -10   49.54    7.99
   1  -4  -9  573.05   62.48
   1  -4  -9  518.20   28.17
   1  -4  -9  505.80   27.66
   1  -4  -8   97.69   23.23
   1  -4  -7  513.48   53.77
   1  -4  -6   65.86   18.83
   1  -4  -5  102.95   20.45
   1  -4  -4 2582.35  108.00
   1  -4  -4 2684.83  118.96
  -1   4   4 2715.60   90.95
   1  -4  -3   33.57   10.64
   1  -4  -3   32.13    9.66
  -1   4   3   24.96    5.81
   1  -4  -2  768.04   43.98
  -1   4   2  719.22   35.31
   1  -4  -2  743.46   47.12
   1  -4  -1  173.65   18.43
   1  -4  -1  187.21   20.37
  -1   4   1  142.55   15.48
   1  -4   0  989.18   50.41
  -1   4   0  927.73   49.38
  -1   4  -1  899.19   52.52
   1  -4   1  947.03   42.87
   1  -4   2    5.80    3.74
  -1   4  -2   11.02    8.49
  -1   4  -3 2107.24  103.95
   1  -4   3 2275.60   85.74
  -1   4  -4   71.26   17.76
   1  -4   4   97.01   14.40
  -1   4  -5 1056.55   77.20
   1  -4   5 1208.07   61.71
   1  -4   6  880.91   54.64
   1  -4   7   31.59    9.92
  -1   4  -8  233.30   17.36
  -1   4  -8  266.26   18.74
   1  -4   8  250.42   20.07
   1  -4   8  200.51   27.59
  -1   4  -9   13.22    4.05
  -1   4  -9   12.65    4.59
   1  -4   9   12.77    9.52
   1  -4   9    4.86    2.78
  -1   4 -10  381.65   23.79
   1  -4  10  399.75   41.81
   1  -4  10  352.00   24.75
  -1   4 -10  371.22   23.31
  -1   4 -11   42.62    7.23
   1  -4  11   66.18    9.97
   1  -4  12   74.86   10.23
   1  -4  13  277.78   18.67
   1  -4  14    1.57    1.68
   1  -4  15  109.52    7.91
   1  -3 -16   14.36    2.65
   1  -3 -16    3.20    1.50
   1  -3 -15  238.87   14.81
   1  -3 -14  115.34   10.96
   1  -3 -13  129.34   12.55
   1  -3 -12  249.98   18.53
  -1   3  11    1.28    7.73
   1  -3 -11   15.69    4.89
  -1   3  10  838.14   63.66
   1  -3 -10  809.21   37.70
   1  -3  -9   25.84   16.31
   1  -3  -9   38.70    6.62
   1  -3  -8  185.09   32.89
   1  -3  -7  373.40   44.99
   1  -3  -6  800.30   63.70
   1  -3  -5 3844.06  158.37
   1  -3  -4  154.34   23.11
   1  -3  -3  208.48   24.76
   1  -3  -3  238.78   22.73
  -1   3   2 1694.73   57.82
   1  -3  -2 1705.31   76.38
   1  -3  -2 1729.42   70.20
   1  -3  -1 2744.90   98.66
   1  -3  -1 2536.27   91.62
  -1   3   1 2623.49   86.32
  -1   3   0  261.08   20.56
   1  -3   0  264.33   18.49
   1  -3   1  540.55   28.46
  -1   3  -1  537.17   35.21
  -1   3  -2 1637.48   76.95
   1  -3   2 1635.27   63.30
  -1   3  -3  213.45   27.27
   1  -3   3  248.94   20.91
  -1   3  -4 1322.40   79.39
   1  -3   4 1403.68   63.53
   1  -3   5  354.86   30.29
  -1   3  -5  332.88   39.68
   1  -3   6   -3.09    3.69
   1  -3   7 2137.12   99.46
   1  -3   8    1.03    5.10
  -1   3  -9  507.92   27.29
  -1   3  -9  462.96   26.27
   1  -3   9  488.56   45.63
   1  -3   9  439.39   28.44
  -1   3 -10  377.06   23.10
   1  -3  10  352.43   39.45
   1  -3  10  325.43   24.16
  -1   3 -10  365.45   23.00
  -1   3 -11   32.77    6.46
   1  -3  11   25.96    6.83
   1  -3  12  397.11   25.74
   1  -3  13    4.09    3.35
   1  -3  14   54.99    7.21
   1  -3  15   64.64    6.59
   1  -3  16   57.94    4.64
  -1   3 -16   69.10    5.03
   1  -2 -16  102.86    7.73
   1  -2 -15   58.50    6.97
   1  -2 -14  157.75   13.05
   1  -2 -13  348.25   21.82
   1  -2 -12   56.67    8.36
  -1   2  11  329.81   39.92
  -1   2  10  158.78   27.07
  -1   2   9  637.21   52.88
   1  -2  -9  630.42   66.63
   1  -2  -8 1039.42   82.32
   1  -2  -7  285.08   39.10
   1  -2  -6 3311.05  149.29
   1  -2  -5   10.29    8.88
   1  -2  -4  766.91   53.23
   1  -2  -3 1239.94   65.52
   1  -2  -2   66.81   12.57
   1  -2  -2   83.50   10.94
   1  -2  -1  665.92   36.39
   1  -2  -1  621.42   31.02
  -1   2   1  681.02   25.02
  -1   2   0  471.21   23.83
   1  -2   0  399.35   22.29
   1  -2   1 9999.00  278.40
  -1   2  -1 9684.36  287.13
   1  -2   2  433.48   25.41
  -1   2  -2  454.19   32.83
   1  -2   3   68.93   10.45
  -1   2  -3   67.61   13.36
   1  -2   4 1104.90   53.32
  -1   2  -4 1026.14   64.64
   1  -2   5  323.53   28.26
   1  -2   6  803.79   51.01
   1  -2   7  256.03   29.37
   1  -2   8  737.56   54.39
   1  -2   9 1229.32   75.92
  -1   2  -9 1181.98   47.85
  -1   2  -9 1184.86   47.44
  -1   2  -9 1175.20   47.72
  -1   2 -10  245.11   17.76
   1  -2  10  233.27   32.33
   1  -2  10  212.92   19.00
  -1   2 -10  237.35   17.87
  -1   2 -11   82.19    9.86
   1  -2  11  125.76   24.24
   1  -2  11  104.59   12.92
   1  -2  12  113.03   13.33
   1  -2  13  160.06   14.97
   1  -2  14  116.92   11.24
   1  -2  15  103.72    9.05
   1  -2  16  121.52    7.78
  -1   2 -16  132.21    8.07
   1  -1 -16   44.52    4.96
   1  -1 -15   81.30    8.14
   1  -1 -14  239.03   16.44
  -1   1  13   26.30    5.59
  -1   1  12  563.07   29.60
  -1   1  11  129.99   24.95
  -1   1  11  102.27   11.99
  -1   1  10  435.45   44.40
  -1   1  10  366.37   23.48
  -1   1   9  328.87   36.88
   1  -1  -8   12.51    7.92
   1  -1  -7  907.72   72.44
   1  -1  -6  779.19   62.49
   1  -1  -5 1854.23   96.34
   1  -1  -4 3622.35  142.44
   1  -1  -3   93.94   15.88
   1  -1  -2 8020.33  244.26
   1  -1  -1   95.84   11.66
   1  -1  -1   87.66    8.39
   1  -1   0 2459.82   72.42
   1  -1   0 2506.80   78.06
   1  -1   1 2823.16   88.24
  -1   1  -1 2833.94   93.69
  -1   1  -2 2014.96   77.64
   1  -1   2 1847.34   66.55
   1  -1   3 2516.76   88.73
   1  -1   4  216.40   20.80
   1  -1   5  465.53   34.16
   1  -1   6 1317.89   68.22
   1  -1   7 1704.52   84.87
   1  -1   8  162.39   24.04
   1  -1   9    3.97    5.91
   1  -1  10  740.73   59.22
  -1   1 -10  733.88   33.64
  -1   1 -10  718.09   34.32
  -1   1 -10  709.52   34.22
   1  -1  11   83.32   19.16
   1  -1  11   81.21   11.46
   1  -1  12  192.09   17.51
   1  -1  13  201.08   17.12
   1  -1  14   23.49    5.83
   1  -1  15  270.88   16.23
  -1   1 -15  303.62   16.62
   1  -1  16    0.45    0.96
  -1   1 -16   -0.07    1.13
   1   0 -16   43.00    4.65
   1   0 -15  186.59   12.48
  -1   0  14    6.08    2.13
   1   0 -14    7.24    3.21
  -1   0  13  341.17   21.18
  -1   0  12  111.66   12.08
   1   0 -12   85.02   10.16
  -1   0  11  161.87   28.02
  -1   0  11  152.06   14.59
  -1   0  10  848.18   64.40
  -1   0  10  798.54   38.93
  -1   0   9  223.57   30.83
  -1   0   8  537.06   45.87
   1   0  -8  567.88   59.49
   1   0  -7  949.34   73.80
   1   0  -6 1872.94  103.71
   1   0  -5 1290.10   77.38
   1   0  -4 4534.68  156.57
   1   0  -4 4632.08  169.24
   1   0  -3 6124.58  189.42
   1   0  -3 6087.81  201.06
   1   0  -2  830.28   36.20
   1   0  -2  819.56   43.34
   1   0  -1 2890.29   84.15
   1   0  -1 2681.58   92.84
   1   0   0 4156.75  119.70
   1   0   1 1278.44   43.10
  -1   0  -1 1219.82   36.96
   1   0   2 2536.94   82.53
   1   0   3  606.13   32.25
   1   0   4 3633.87  124.25
   1   0   5   62.11   12.04
   1   0   6  178.60   21.86
   1   0   7  917.49   57.89
   1   0   8  115.74   20.40
   1   0   9 1693.72   92.32
   1   0  10   40.14   14.30
  -1   0 -10   42.96    7.25
  -1   0 -10   40.17    6.66
   1   0  11  211.15   31.78
  -1   0 -11  252.12   18.18
   1   0  12  330.20   23.73
   1   0  13    0.53    2.38
   1   0  14  174.22   14.68
   1   0  15    7.52    2.51
  -1   0 -15   12.32    3.41
   1   0  16   61.15    5.60
  -1   0 -16   62.77    6.01
   1   1 -16  286.61   13.42
  -1  -1  15   -0.23    1.22
   1   1 -15   -0.49    2.08
  -1  -1  14  266.77   16.47
  -1  -1  13  232.77   17.12
   1   1 -13  255.31   17.23
  -1  -1  12   51.19    8.26
  -1  -1  11  487.20   48.69
  -1  -1  11  403.96   25.79
  -1  -1  10   -0.04    5.62
  -1  -1  10   13.50    4.53
  -1  -1   9  434.65   42.96
  -1  -1   8  692.34   52.78
  -1  -1   7 2850.48  120.20
   1   1  -6   14.82    7.57
   1   1  -6    6.15    7.68
   1   1  -5   44.97   12.49
   1   1  -5   40.06   11.08
   1   1  -4  953.93   55.69
   1   1  -4  944.91   59.03
   1   1  -3 2405.06   93.86
   1   1  -3 2392.75   97.43
   1   1  -2 1930.55   73.20
   1   1  -2 1917.59   75.50
   1   1  -1 1012.33   41.72
   1   1  -1 1018.40   41.86
   1   1   0   60.18    5.70
   1   1   0   65.85    7.48
   1   1   1 5607.58  156.99
  -1  -1  -2    2.97    2.52
   1   1   2   -1.18    2.06
   1   1   3  119.65   12.76
  -1  -1  -3   91.13   10.79
   1   1   4 1416.83   61.12
   1   1   5   13.93    6.71
   1   1   6 1580.93   75.43
   1   1   7   79.69   15.77
   1   1   8  575.95   46.84
   1   1   9  932.98   64.70
   1   1  10  540.83   49.66
  -1  -1 -10  518.43   27.11
   1   1  11  318.29   39.20
  -1  -1 -11  334.97   21.16
  -1  -1 -12    0.96    1.96
   1   1  13  346.23   23.08
   1   1  14   68.62    8.93
  -1  -1 -14   74.87    8.97
   1   1  15  147.00   11.34
  -1  -1 -15  153.28   11.82
   1   1  16  126.85    8.42
  -1  -1 -16  104.62    8.23
  -1  -1 -17    0.56    0.53
   1   2 -16   23.33    3.05
  -1  -2  15   80.79    7.00
   1   2 -15   92.05    7.75
  -1  -2  14  237.39   14.81
   1   2 -14  172.80   12.64
  -1  -2  13    3.94    2.67
  -1  -2  12  172.89   15.43
  -1  -2  11   17.14    5.26
  -1  -2  11   23.88   10.41
  -1  -2  10  637.44   34.20
  -1  -2  10  693.58   57.06
   1   2  -9   48.77    7.70
  -1  -2   9   51.05    8.63
  -1  -2   8  305.64   33.72
  -1  -2   7  419.05   37.77
  -1  -2   6  268.53   27.72
   1   2  -6  252.82   33.57
  -1  -2   5  527.90   36.82
   1   2  -5  487.42   44.40
   1   2  -5  605.66   49.33
   1   2  -4    4.04    6.73
   1   2  -4   11.09    8.15
   1   2  -3  877.26   50.01
   1   2  -3  794.06   49.45
   1   2  -2 2728.24   96.93
   1   2  -2 2597.57   99.55
   1   2  -1 1238.53   54.95
   1   2  -1 1322.13   48.76
   1   2   0 1038.64   45.31
   1   2   1 1258.46   38.98
  -1  -2  -2   16.49    4.77
   1   2   2   21.83    4.39
  -1  -2  -3  432.89   27.91
   1   2   3  452.41   25.87
  -1  -2  -4    4.71    3.96
   1   2   4    8.75    5.46
   1   2   5 2904.22  108.19
   1   2   6   10.86    5.31
   1   2   7 1278.36   69.26
   1   2   8  352.21   35.12
   1   2   9    4.39    4.14
   1   2  10  233.83   31.65
  -1  -2 -10  232.59   16.44
   1   2  11  130.33   24.39
  -1  -2 -11  122.65   12.10
  -1  -2 -12  305.93   19.51
   1   2  13   85.83   10.86
  -1  -2 -13   75.55    9.74
   1   2  14  141.16   12.85
  -1  -2 -14  156.67   13.17
   1   2  15  160.64   11.87
  -1  -2 -15  180.84   12.94
  -1  -2 -16    8.33    1.99
  -1  -2 -17   90.31    5.97
  -1  -3  15   53.99    5.36
   1   3 -15   51.01    4.92
  -1  -3  14   11.96    3.33
   1   3 -14   12.13    3.35
  -1  -3  13  175.15   14.25
  -1  -3  12    1.73    2.43
  -1  -3  11  350.54   23.75
   1   3 -10  201.70   16.70
  -1  -3  10  183.85   16.81
  -1  -3  10  193.35   28.92
   1   3  -9   89.86   10.85
  -1  -3   9   96.25   19.62
  -1  -3   9   80.86   10.91
  -1  -3   8 1045.84   66.38
  -1  -3   7   73.91   15.52
   1   3  -7   63.45   19.34
  -1  -3   6  183.71   22.11
   1   3  -6  177.75   29.19
  -1  -3   5  725.07   43.63
   1   3  -5  646.53   55.41
   1   3  -4  228.24   29.78
  -1  -3   4  273.22   22.84
   1   3  -3  886.10   57.70
  -1  -3   3  992.26   44.07
  -1  -3   2  120.98   10.90
   1   3  -2  113.38   17.78
  -1  -3   1  179.87   10.06
   1   3  -1  176.40   19.83
   1   3   0 5167.50  166.53
   1   3   1 4343.48  142.75
   1   3   2  310.78   16.52
  -1  -3  -3   79.50   12.15
  -1  -3  -3   72.39   11.60
   1   3   3   77.36    9.48
  -1  -3  -4 1916.05   83.86
  -1  -3  -4 1821.40   79.38
   1   3   4 1868.47   72.80
  -1  -3  -5   42.10   12.69
  -1  -3  -5   47.53   11.92
   1   3   5   41.10    9.60
   1   3   6  548.53   38.94
   1   3   7  451.13   37.40
   1   3   8    1.31    3.43
   1   3   9  466.62   43.25
   1   3  10   32.62   11.79
   1   3  11  219.91   31.74
  -1  -3 -11  217.00   17.27
  -1  -3 -12  146.57   13.89
  -1  -3 -13   57.80    8.55
   1   3  14  191.46   14.70
  -1  -3 -14  205.33   15.34
  -1  -3 -15   12.66    3.37
  -1  -3 -16  112.39    8.50
  -1  -3 -17   89.90    5.93
  -1  -4  15    2.21    1.15
   1   4 -15    6.97    1.81
  -1  -4  14  107.80    8.96
   1   4 -14  105.15    8.78
  -1  -4  13   26.34    5.09
  -1  -4  12  149.72   14.04
  -1  -4  11  129.31   13.61
   1   4 -10    1.42    3.03
  -1  -4  10    1.22    2.44
   1   4  -9  460.54   26.27
  -1  -4   9  442.77   27.15
   1   4  -8  235.13   17.63
  -1  -4   8  242.14   19.09
   1   4  -7  189.61   33.74
  -1  -4   7  167.75   22.93
  -1  -4   6  352.31   31.61
   1   4  -6  403.93   46.90
   1   4  -5  519.05   50.96
  -1  -4   5  471.04   33.95
   1   4  -4 1052.47   72.37
  -1  -4   4 1250.65   55.83
  -1  -4   3   18.27    5.06
   1   4  -3   21.45    8.89
  -1  -4   2  491.79   24.04
   1   4  -2  490.83   40.56
   1   4  -1  944.52   55.56
  -1  -4   1  957.43   30.47
   1   4   0  968.35   53.72
   1   4   1 2064.88   85.52
   1   4   2  186.85   20.62
   1   4   2  186.92   11.27
  -1  -4  -3   31.49    7.11
  -1  -4  -3   31.21    9.11
   1   4   3   31.55    5.62
  -1  -4  -4  634.64   41.54
  -1  -4  -4  620.97   42.56
   1   4   4  622.24   34.39
  -1  -4  -5  612.72   45.69
   1   4   5  595.11   37.36
  -1  -4  -5  649.55   45.40
  -1  -4  -6 1245.51   69.58
   1   4   6 1195.64   61.41
   1   4   7   11.74    5.03
   1   4   8  959.07   60.74
   1   4   9    6.16    4.04
  -1  -4  -9    9.67    3.74
   1   4  10  437.20   43.43
  -1  -4 -10  447.83   24.03
  -1  -4 -10  454.52   26.29
   1   4  11  557.01   50.67
  -1  -4 -11  565.05   30.37
  -1  -4 -12    9.84    3.66
  -1  -4 -13  254.40   17.29
  -1  -4 -13  209.86   16.81
  -1  -4 -14   19.15    4.59
  -1  -4 -15  233.39   14.91
  -1  -4 -16   63.80    6.18
   1   5 -15   41.66    3.80
  -1  -5  14   94.84    7.69
   1   5 -14   82.56    7.17
  -1  -5  13   53.24    6.75
  -1  -5  12  132.88   12.67
  -1  -5  11   -1.38    3.34
   1   5 -10  483.25   27.90
  -1  -5  10  476.48   28.50
   1   5  -9   67.50    9.42
  -1  -5   9   56.91    8.94
   1   5  -8  310.48   21.25
  -1  -5   8  265.66   20.43
   1   5  -7  533.35   28.83
   1   5  -7  508.72   58.95
  -1  -5   7  546.32   30.20
   1   5  -6   43.99   17.39
   1   5  -5  446.26   49.39
   1   5  -4 1004.94   74.25
  -1  -5   4 1135.53   51.86
   1   5  -3 1264.49   79.56
   1   5  -2  390.20   38.90
   1   5  -1  417.79   38.08
   1   5   0 1501.87   76.44
   1   5   1    2.98    5.64
   1   5   2 1674.16   78.24
   1   5   3 1546.71   55.16
   1   5   3 1605.83   75.33
  -1  -5  -3 1447.69   74.97
  -1  -5  -4   82.90   13.42
   1   5   4   70.37   10.08
  -1  -5  -4   69.70   14.16
   1   5   5 2765.38  103.53
  -1  -5  -5 2970.37  121.96
  -1  -5  -6   15.31    6.51
   1   5   6    4.55    4.07
   1   5   7 2355.68  100.61
   1   5   8   65.02   14.09
  -1  -5  -9  224.15   15.95
  -1  -5  -9  217.87   15.88
   1   5   9  220.62   28.05
  -1  -5  -9  206.98   15.43
  -1  -5  -9  220.63   17.19
  -1  -5 -10  414.27   23.59
   1   5  10  399.94   40.81
  -1  -5 -10  432.80   24.02
  -1  -5 -10  436.07   25.77
   1   5  11   15.80    8.59
  -1  -5 -11    7.26    3.66
  -1  -5 -12  502.29   28.14
  -1  -5 -13   44.50    6.94
  -1  -5 -13   50.55    7.92
  -1  -5 -14  238.94   14.99
  -1  -5 -14  216.44   15.39
  -1  -5 -15   50.78    6.34
  -1  -5 -16   10.61    2.51
  -1  -6  14   24.92    3.35
   1   6 -14   28.09    3.42
  -1  -6  13  224.96   13.69
  -1  -6  12    7.73    3.49
  -1  -6  11  239.16   17.77
   1   6 -10   94.85   11.21
  -1  -6  10   87.69   11.12
   1   6  -9   72.38    9.99
  -1  -6   9   67.17   10.11
   1   6  -8  748.27   36.99
  -1  -6   8  769.83   37.81
   1   6  -7   25.87    5.80
  -1  -6   7   21.62    5.64
   1   6  -7   17.30   10.55
   1   6  -6  649.44   32.37
   1   6  -6  584.15   62.52
  -1  -6   6  619.60   32.37
   1   6  -5  225.33   36.28
   1   6  -4 1326.01   90.67
   1   6  -3  214.18   32.35
   1   6  -2  115.78   22.24
   1   6  -1 2472.10  116.49
   1   6   0    2.06    4.60
   1   6   1 2203.59  101.59
   1   6   2 2672.22  113.50
   1   6   3  726.72   49.36
  -1  -6  -3  653.24   49.04
  -1  -6  -4 1573.48   83.26
   1   6   4 1592.48   79.70
  -1  -6  -5    4.66    5.37
   1   6   5    7.71    5.73
   1   6   6 1146.81   67.70
  -1  -6  -6 1161.55   72.56
  -1  -6  -7  320.51   37.07
  -1  -6  -8  405.61   22.94
  -1  -6  -8  407.98   22.46
  -1  -6  -8  385.39   22.20
  -1  -6  -8  413.55   24.35
  -1  -6  -9  749.16   34.11
  -1  -6  -9  771.07   34.93
  -1  -6  -9  747.05   34.07
  -1  -6  -9  743.91   36.14
  -1  -6 -10   34.74    6.39
  -1  -6 -10   31.40    6.02
  -1  -6 -10   35.29    6.98
  -1  -6 -11  695.61   34.83
  -1  -6 -12   32.57    6.30
  -1  -6 -12   43.38    7.60
  -1  -6 -13  157.74   13.67
  -1  -6 -13  156.26   13.04
  -1  -6 -13  153.34   13.68
  -1  -6 -14  100.72    9.24
  -1  -6 -14  140.00   11.39
  -1  -6 -14  133.48   11.53
  -1  -6 -15    7.32    2.14
  -1  -6 -15    6.20    2.20
  -1  -7  13    2.43    1.48
  -1  -7  12   91.94    8.62
  -1  -7  11   52.64    7.48
   1   7 -10  134.62   12.90
  -1  -7  10  135.82   13.14
   1   7  -9  368.23   23.80
  -1  -7   9  383.81   24.12
   1   7  -8    2.83    2.90
  -1  -7   8    3.50    3.86
   1   7  -7  576.32   31.17
  -1  -7   7  583.30   31.37
   1   7  -7  518.33   62.91
   1   7  -6  255.61   19.30
  -1  -7   6  248.65   19.00
   1   7  -6  245.41   41.44
   1   7  -5  219.95   17.15
   1   7  -5  197.22   35.50
  -1  -7   5  233.56   17.74
   1   7  -4  763.48   69.38
   1   7  -3   10.88   11.06
   1   7  -2 1091.70   77.86
   1   7  -1  127.35   24.51
   1   7   0  157.73   25.41
   1   7   1  706.68   54.45
   1   7   2  168.32   25.01
   1   7   3  509.35   43.24
  -1  -7  -3  469.59   43.24
   1   7   4   19.53    7.60
  -1  -7  -4   14.77    7.38
  -1  -7  -5  781.03   58.73
   1   7   5  806.59   55.75
  -1  -7  -6  540.97   48.78
  -1  -7  -7  461.20   24.52
  -1  -7  -7  496.39   26.05
  -1  -7  -7  559.59   50.33
  -1  -7  -7  496.10   27.51
  -1  -7  -7  454.10   26.36
  -1  -7  -8 1586.32   58.61
  -1  -7  -8 1651.29   60.25
  -1  -7  -8 1662.16   62.80
  -1  -7  -8 1581.81   61.40
  -1  -7  -9    4.01    3.20
  -1  -7  -9    4.19    2.41
  -1  -7  -9    5.59    2.50
  -1  -7  -9    8.74    3.80
  -1  -7  -9    2.80    2.85
  -1  -7 -10  206.21   15.50
  -1  -7 -10  184.61   16.15
  -1  -7 -10  192.30   14.95
  -1  -7 -10  200.09   17.42
  -1  -7 -10  171.58   15.76
  -1  -7 -11  164.39   13.72
  -1  -7 -11  226.68   17.42
  -1  -7 -11  199.24   17.06
  -1  -7 -11  195.99   16.46
  -1  -7 -12  210.21   16.96
  -1  -7 -12  211.95   16.22
  -1  -7 -12  197.83   16.22
  -1  -7 -13  199.27   15.26
  -1  -7 -13  204.35   14.73
  -1  -7 -13  202.22   15.29
  -1  -7 -14    5.38    2.05
  -1  -7 -14    9.47    2.75
  -1  -7 -14    8.28    2.93
  -1  -7 -15  152.89    9.61
  -1  -7 -15  136.56    8.73
  -1  -8  13   32.11    3.41
   1   8 -13   31.00    3.52
  -1  -8  12   74.36    6.74
  -1  -8  11   75.78    7.81
  -1  -8  10  299.27   18.60
   1   8  -9    7.46    4.01
  -1  -8   9   -1.37    2.08
   1   8  -8  729.13   36.05
  -1  -8   8  774.34   36.33
   1   8  -7  187.67   16.23
  -1  -8   7  197.20   16.61
   1   8  -6   17.48    5.55
  -1  -8   6   16.76    5.48
   1   8  -5  387.45   24.35
  -1  -8   5  457.09   25.82
   1   8  -5  344.06   49.57
   1   8  -4    3.91    2.59
  -1  -8   4    9.15    4.30
   1   8  -4   -0.92    5.70
   1   8  -3  839.32   38.28
  -1  -8   3  889.98   38.46
  -1  -8   3  948.66   44.21
   1   8  -2  288.88   38.93
   1   8  -1  628.94   58.13
   1   8   0  363.66   42.44
   1   8   1    8.34    8.76
   1   8   2  444.41   43.62
  -1  -8  -2  416.67   42.37
  -1  -8  -3   73.70   17.23
   1   8   3   81.22   17.64
  -1  -8  -4  366.22   40.51
   1   8   4  476.36   43.35
  -1  -8  -5  718.35   33.24
  -1  -8  -5  750.64   35.55
  -1  -8  -5  751.25   32.95
  -1  -8  -5  722.95   35.17
  -1  -8  -5  762.14   36.49
  -1  -8  -5  610.10   54.82
  -1  -8  -6  138.97   12.31
  -1  -8  -6  146.72   13.12
  -1  -8  -6  156.61   14.93
  -1  -8  -6  153.35   14.38
  -1  -8  -6  162.33   27.20
  -1  -8  -7  719.19   34.43
  -1  -8  -7  763.19   33.87
  -1  -8  -7  724.64   36.34
  -1  -8  -7  748.65   37.70
  -1  -8  -7  830.26   65.01
  -1  -8  -8  181.44   14.50
  -1  -8  -8  178.90   16.29
  -1  -8  -8  186.35   16.97
  -1  -8  -9  103.29   10.85
  -1  -8  -9  127.35   11.91
  -1  -8  -9  122.76   13.07
  -1  -8  -9  131.41   14.01
  -1  -8  -9  113.30   12.46
  -1  -8 -10  219.55   16.07
  -1  -8 -10  238.29   18.36
  -1  -8 -10  232.34   18.92
  -1  -8 -10  182.30   14.45
  -1  -8 -10  220.36   17.63
  -1  -8 -11  152.16   12.64
  -1  -8 -11  207.98   16.37
  -1  -8 -11  182.90   16.15
  -1  -8 -11  190.88   15.86
  -1  -8 -12  354.06   21.16
  -1  -8 -12  339.32   21.77
  -1  -8 -13    5.50    2.21
  -1  -8 -13   12.11    3.54
  -1  -8 -14  235.73   14.29
  -1  -8 -14  222.33   13.13
  -1  -8 -15   31.04    3.82
  -1  -8 -15   27.55    3.37
  -1  -9  12    1.36    1.05
  -1  -9  11   99.46    7.85
  -1  -9  10   21.57    4.00
   1   9  -9  190.54   14.54
  -1  -9   9  202.89   14.53
   1   9  -8  169.51   14.49
  -1  -9   8  180.54   14.44
   1   9  -7   43.95    7.49
  -1  -9   7   52.02    8.15
   1   9  -6  538.26   29.76
  -1  -9   6  610.55   30.57
   1   9  -5   66.28    9.18
  -1  -9   5   62.95    8.91
   1   9  -5   45.10   20.69
   1   9  -4  253.76   18.74
  -1  -9   4  283.52   19.16
   1   9  -4  234.10   40.75
   1   9  -3  594.39   30.46
  -1  -9   3  631.09   30.69
   1   9  -2  347.98   21.44
  -1  -9   2  373.49   21.87
  -1  -9   2  357.92   25.00
   1   9  -2  322.27   44.32
   1   9  -1  433.35   50.18
  -1  -9   0    1.96    3.31
   1   9   0    6.52    4.44
  -1  -9  -1  494.31   28.25
  -1  -9  -1  509.55   26.14
   1   9   1  503.91   50.71
  -1  -9  -2  329.07   22.29
  -1  -9  -2  406.36   42.62
   1   9   2  357.91   41.14
  -1  -9  -2  337.97   20.46
  -1  -9  -3  683.94   34.75
  -1  -9  -3  684.95   31.91
  -1  -9  -3  730.92   59.57
  -1  -9  -4  246.56   19.11
  -1  -9  -4  231.32   18.27
  -1  -9  -4  244.58   18.70
  -1  -9  -4  269.99   35.47
  -1  -9  -4  236.47   16.85
  -1  -9  -5   39.21    7.11
  -1  -9  -5   27.87    6.10
  -1  -9  -5   29.78    6.51
  -1  -9  -5   30.10    8.53
  -1  -9  -5   38.68    6.49
  -1  -9  -6  325.54   22.02
  -1  -9  -6  322.61   20.06
  -1  -9  -6  311.91   21.89
  -1  -9  -6  311.12   22.42
  -1  -9  -6  339.66   41.34
  -1  -9  -7   94.42   10.03
  -1  -9  -7   94.03   11.29
  -1  -9  -7  100.61   12.35
  -1  -9  -7   97.49   11.84
  -1  -9  -7  120.14   24.35
  -1  -9  -8  106.68   11.86
  -1  -9  -8  135.99   12.31
  -1  -9  -8  132.40   14.20
  -1  -9  -8  142.54   14.35
  -1  -9  -9   95.92   10.74
  -1  -9  -9  122.65   11.71
  -1  -9  -9  112.34   12.93
  -1  -9  -9  110.96   12.59
  -1  -9  -9  103.61   10.54
  -1  -9 -10   11.32    4.57
  -1  -9 -10   10.18    3.62
  -1  -9 -10    2.16    2.54
  -1  -9 -10    3.94    2.23
  -1  -9 -11  629.89   29.73
  -1  -9 -11  595.05   30.57
  -1  -9 -12    2.09    1.77
  -1  -9 -12    0.91    2.25
  -1  -9 -13  266.74   16.42
  -1  -9 -13  242.65   14.77
  -1  -9 -14  114.19    8.79
  -1  -9 -14  110.89    8.03
  -1 -10  11   33.39    3.42
  -1 -10  10    2.10    1.29
  -1 -10   9   92.19    8.20
   1  10  -8    6.15    3.09
  -1 -10   8    7.04    3.20
   1  10  -7  114.48   11.26
  -1 -10   7  124.95   11.24
   1  10  -6    9.45    3.97
  -1 -10   6    9.37    3.63
   1  10  -5  199.79   15.77
  -1 -10   5  178.79   14.61
   1  10  -4  232.52   16.90
  -1 -10   4  189.02   15.00
   1  10  -3   86.97   10.04
  -1 -10   3   69.36    8.86
   1  10  -3   82.18   23.81
  -1 -10   2  273.96   18.30
   1  10  -2  337.52   46.50
   1  10  -1   90.38   24.07
   1  10   0  765.69   68.58
  -1 -10   0  792.92   35.72
  -1 -10  -1    2.30    2.66
  -1 -10  -1    5.30    3.80
  -1 -10  -1    5.05    3.20
  -1 -10  -2   74.38   10.39
  -1 -10  -2   68.27    8.90
  -1 -10  -2   72.84   18.58
  -1 -10  -3  462.59   28.24
  -1 -10  -3  489.58   50.36
  -1 -10  -3  492.48   26.09
  -1 -10  -4    0.03    2.89
  -1 -10  -4    2.04    1.96
  -1 -10  -4    1.28    1.49
  -1 -10  -4   -3.98    6.35
  -1 -10  -5  474.38   25.51
  -1 -10  -5  474.00   28.17
  -1 -10  -5  463.74   27.89
  -1 -10  -5  469.27   28.12
  -1 -10  -6   43.56    7.47
  -1 -10  -6   48.83    8.64
  -1 -10  -6   40.64    7.69
  -1 -10  -6   41.14    6.60
  -1 -10  -7  257.80   19.45
  -1 -10  -7  276.68   18.35
  -1 -10  -7  287.82   20.85
  -1 -10  -7  291.05   21.47
  -1 -10  -8  126.66   12.98
  -1 -10  -8  152.96   13.16
  -1 -10  -8  160.30   14.65
  -1 -10  -8  170.11   15.94
  -1 -10  -9   47.88    7.18
  -1 -10  -9   58.87    8.94
  -1 -10  -9   54.50    8.75
  -1 -10  -9   54.73    7.25
  -1 -10  -9   61.23    7.84
  -1 -10 -10  260.58   16.79
  -1 -10 -10  265.81   19.34
  -1 -10 -10  269.77   16.44
  -1 -10 -10  280.29   19.00
  -1 -10 -11    1.17    2.23
  -1 -10 -11    3.63    1.86
  -1 -10 -11    2.83    1.96
  -1 -10 -12  116.26   10.10
  -1 -10 -12  117.14   10.71
  -1 -10 -13  135.59   10.25
  -1 -10 -13  125.97    9.21
  -1 -11  10  102.28    6.14
  -1 -11   9   -1.55    1.03
  -1 -11   8   94.72    7.69
   1  11  -7   57.29    7.00
  -1 -11   7   58.46    6.48
   1  11  -6  254.82   16.07
  -1 -11   6  210.87   14.09
   1  11  -5   35.60    5.97
  -1 -11   5   25.24    4.69
   1  11  -4    2.35    1.95
  -1 -11   4    1.43    2.26
  -1 -11   3  760.70   33.08
  -1 -11   2   23.91    5.67
  -1 -11   1  371.93   22.24
  -1 -11   0  121.66   12.04
  -1 -11  -1   13.32    4.19
  -1 -11  -2  677.94   35.03
  -1 -11  -2  668.64   32.07
  -1 -11  -3   44.79    8.31
  -1 -11  -3   38.35    6.83
  -1 -11  -4  175.10   15.87
  -1 -11  -4  165.85   13.92
  -1 -11  -5  356.97   20.90
  -1 -11  -5  361.48   23.57
  -1 -11  -6  262.45   19.29
  -1 -11  -6  253.06   17.13
  -1 -11  -7  192.30   16.00
  -1 -11  -7  192.55   14.62
  -1 -11  -7  213.54   17.33
  -1 -11  -8   11.75    4.08
  -1 -11  -8   12.65    4.06
  -1 -11  -8   14.79    4.18
  -1 -11  -8   13.96    4.18
  -1 -11  -9  263.58   16.41
  -1 -11  -9  279.14   18.55
  -1 -11  -9  263.66   18.75
  -1 -11  -9  283.80   16.41
  -1 -11 -10   33.87    5.39
  -1 -11 -10   35.44    5.19
  -1 -11 -10   33.44    5.72
  -1 -11 -10   27.70    5.61
  -1 -11 -10   31.81    4.98
  -1 -11 -11  154.87   12.52
  -1 -11 -11  156.25    9.94
  -1 -11 -11  148.95   11.62
  -1 -11 -12  123.07    9.92
  -1 -12   8   22.57    3.12
  -1 -12   7  106.60    7.99
   1  12  -6  250.00   13.94
  -1 -12   6  265.42   14.68
   1  12  -5   53.05    6.11
  -1 -12   5   50.92    6.50
  -1 -12   4  262.96   16.33
  -1 -12   3    5.47    3.28
  -1 -12   2   72.36    8.68
  -1 -12   1  293.56   18.61
  -1 -12   0   65.27    8.37
  -1 -12  -1  130.89   12.08
  -1 -12  -2   24.52    5.45
  -1 -12  -3  490.73   25.53
  -1 -12  -4  270.54   17.52
  -1 -12  -4  253.86   19.02
  -1 -12  -5  182.12   15.72
  -1 -12  -5  183.89   14.06
  -1 -12  -6  167.03   13.17
  -1 -12  -6  180.51   15.05
  -1 -12  -7   35.88    6.36
  -1 -12  -7   27.25    5.04
  -1 -12  -8  206.33   13.87
  -1 -12  -8  216.84   15.34
  -1 -12  -8  240.21   14.52
  -1 -12  -9   90.32    8.20
  -1 -12  -9   75.83    7.92
  -1 -12  -9   87.53    7.71
  -1 -12 -10   48.89    5.08
  -1 -13   7   75.27    5.15
  -1 -13   6   10.37    2.13
  -1 -13   5  138.98    9.25
  -1 -13   4   48.34    5.61
  -1 -13   3  161.51   11.48
  -1 -13   2  147.00   11.23
  -1 -13   1   25.48    4.62
  -1 -13   0  228.58   15.10
  -1 -13  -1   41.90    6.05
  -1 -13  -2  252.75   16.06
  -1 -13  -3  138.31   11.37
  -1 -13  -4   18.78    3.88
  -1 -13  -5  478.81   22.93
  -1 -13  -6   -0.91    1.74
  -1 -13  -7  226.37   13.67
  -1 -13  -8  123.88    9.15
  -1 -13  -8  123.74    8.92
  -1 -13  -9   34.16    4.33
  -1 -13  -9   35.83    4.06
  -1 -14   4   64.07    5.13
  -1 -14   3  260.51   12.77
  -1 -14   2    1.26    1.20
  -1 -14   1  277.02   14.44
  -1 -14   0   31.19    4.52
  -1 -14  -1  122.40    9.26
  -1 -14  -2  172.38   11.25
  -1 -14  -3    3.55    1.76
  -1 -14  -4  235.31   13.27
  -1 -14  -5    2.07    1.02
  -1 -14  -6  147.47    9.61
  -1 -14  -7  209.83   11.23
  -1 -14  -7  208.74   10.81
  -1 -14  -8   32.42    3.72
  -1 -14  -8   29.19    3.19
  -1 -15   1   40.20    3.75
  -1 -15   0   99.15    6.56
  -1 -15  -1  101.35    6.71
  -1 -15  -2   -0.77    0.91
  -1 -15  -3  126.58    7.74
  -1 -15  -4   37.37    3.83
  -1 -15  -5   97.60    6.30
  -1 -15  -5   96.51    6.05
  -1 -15  -6   68.08    4.88
   2 -14  -6  107.46    6.14
   2 -14  -5  109.99    6.69
   2 -14  -4   52.25    4.61
   2 -14  -3  172.16    9.37
   2 -14  -2   20.02    3.03
   2 -14  -1  127.93    7.87
   2 -14   0   45.66    4.43
   2 -14   1   57.03    4.77
   2 -14   2  111.76    6.64
   2 -13  -9   96.32    6.91
   2 -13  -8   29.41    4.04
   2 -13  -7  168.85   11.40
   2 -13  -7  166.00    9.51
   2 -13  -6   79.41    8.01
   2 -13  -6   73.29    6.29
   2 -13  -5   23.23    4.43
   2 -13  -5   18.28    3.32
   2 -13  -4  201.87   13.85
   2 -13  -4  182.11   11.44
   2 -13  -3   12.58    2.74
   2 -13  -2  205.60   12.55
   2 -13  -1  130.23    9.62
   2 -13   0   41.25    5.23
   2 -13   0   34.40    5.91
   2 -13   1  130.93    9.50
   2 -13   2    2.61    1.57
  -2  13  -3  120.89    8.44
   2 -13   3  154.30    9.46
  -2  13  -4   35.68    4.08
   2 -13   4   39.78    4.41
  -2  13  -5   72.95    5.52
   2 -13   5   80.66    5.72
   2 -12 -10  113.16    8.01
   2 -12  -9   64.42    6.73
   2 -12  -8  107.72    8.14
   2 -12  -8  117.45   10.15
   2 -12  -7  164.34   10.99
   2 -12  -7  169.37   13.14
   2 -12  -6   13.86    4.27
   2 -12  -6   10.68    2.70
   2 -12  -5  277.52   16.09
   2 -12  -5  303.38   19.57
   2 -12  -4   30.82    5.90
   2 -12  -4   33.07    5.11
   2 -12  -3  183.28   15.03
   2 -12  -3  187.52   13.17
   2 -12  -2  174.51   12.78
   2 -12  -2  166.02   14.21
   2 -12  -2  174.47   15.44
   2 -12  -1   52.19    7.58
   2 -12  -1   39.50    7.37
   2 -12  -1   65.02    7.51
   2 -12   0  150.34   14.66
   2 -12   0  215.75   14.13
  -2  12  -1   36.26    5.59
   2 -12   1   20.22    5.41
   2 -12   1   22.00    4.31
  -2  12  -2  190.65   13.34
   2 -12   2  184.04   15.71
   2 -12   2  191.49   13.22
  -2  12  -3  111.67    9.81
   2 -12   3  111.13    9.47
  -2  12  -4   86.27    8.38
   2 -12   4   91.90    8.19
  -2  12  -5  194.15   12.58
   2 -12   5  186.09   11.58
  -2  12  -6    5.15    2.23
   2 -12   6    1.04    1.03
  -2  12  -7  142.92    9.01
   2 -12   7  151.01    8.57
   2 -11 -11  177.65   10.70
   2 -11 -11  189.99   11.50
   2 -11 -10   85.70    8.15
   2 -11 -10   93.70    8.74
   2 -11  -9   94.12    8.01
   2 -11  -9   96.24    9.56
   2 -11  -9   90.80    8.83
   2 -11  -8  166.16   13.70
   2 -11  -8  175.99   12.02
   2 -11  -8  161.68   13.23
   2 -11  -7   11.15    3.90
   2 -11  -7    8.83    3.57
   2 -11  -7    7.68    2.56
   2 -11  -6  330.20   18.69
   2 -11  -6  306.32   20.73
   2 -11  -5   23.77    4.97
   2 -11  -5   12.79    4.63
   2 -11  -4   76.70    9.82
   2 -11  -4   83.33    8.88
   2 -11  -4   63.69    9.67
   2 -11  -3   87.97    9.28
   2 -11  -3   67.09   10.46
   2 -11  -2    2.20    2.11
   2 -11  -2    3.43    2.40
   2 -11  -2   -1.40    1.78
   2 -11  -1  119.74   12.38
   2 -11  -1  126.63   11.48
   2 -11  -1   90.75   12.19
   2 -11  -1  122.54   12.14
   2 -11   0   57.44    8.27
   2 -11   0   48.81    7.02
   2 -11   0   41.96    8.27
   2 -11   0   59.03    8.59
   2 -11   1   53.61    7.38
   2 -11   1   49.34    9.39
   2 -11   1   65.14    8.59
   2 -11   2   54.11    9.33
   2 -11   2   51.94    7.26
  -2  11  -3   72.28    9.11
   2 -11   3   73.26   10.78
   2 -11   3   68.10    8.20
  -2  11  -4  368.48   21.73
   2 -11   4  378.26   20.57
  -2  11  -5    5.45    2.66
  -2  11  -6  220.82   14.97
  -2  11  -7   91.01    8.58
  -2  11  -8   28.80    4.25
   2 -11   8   33.71    4.11
  -2  11  -9   81.12    6.40
   2 -11   9   82.49    5.75
   2 -10 -13    3.75    1.41
   2 -10 -12   87.91    6.88
   2 -10 -12   96.48    8.07
   2 -10 -11  164.03   11.55
   2 -10 -11  183.83   12.79
   2 -10 -10   45.27    6.51
   2 -10 -10   53.35    7.20
   2 -10  -9  237.61   14.84
   2 -10  -9  222.81   16.38
   2 -10  -8   56.57    7.10
   2 -10  -8   51.46    7.88
   2 -10  -7   76.08    8.60
   2 -10  -7  101.83   11.29
   2 -10  -6   42.80    6.93
   2 -10  -6   34.83    5.96
   2 -10  -5  222.19   18.62
   2 -10  -5  193.03   16.18
   2 -10  -4  398.52   24.66
   2 -10  -4  372.39   21.00
   2 -10  -4  338.80   21.87
   2 -10  -3   -1.45    2.66
   2 -10  -3    6.26    4.04
   2 -10  -3   -0.68    2.75
   2 -10  -3    0.46    1.81
   2 -10  -2  391.69   24.61
   2 -10  -2  413.43   22.65
   2 -10  -2  408.21   23.89
   2 -10  -1  112.60   12.65
   2 -10  -1  121.22   11.73
   2 -10  -1  128.92   15.30
   2 -10  -1  126.72   12.58
   2 -10   0   79.23    9.30
   2 -10   0   75.61    9.76
   2 -10   0   77.47   11.79
   2 -10   0   84.09   10.23
   2 -10   1  292.17   20.20
   2 -10   1  322.63   20.01
   2 -10   1  316.89   24.86
   2 -10   1  330.31   21.17
   2 -10   2    5.30    2.45
   2 -10   2    8.36    4.39
   2 -10   2    6.44    2.81
   2 -10   3  347.35   25.81
   2 -10   3  334.01   20.84
  -2  10  -4   -1.39    2.28
   2 -10   4    2.68    2.65
   2 -10   4    2.57    2.19
  -2  10  -5  151.52   13.92
  -2  10  -6  375.82   22.57
  -2  10  -7   37.06    6.23
  -2  10  -8   87.22    9.08
  -2  10  -9    1.53    1.52
  -2  10 -10  192.73   11.17
   2  -9 -14   28.61    3.57
   2  -9 -13   96.37    7.95
   2  -9 -12  172.70   11.29
   2  -9 -12  189.98   12.97
   2  -9 -11    9.63    3.17
   2  -9 -10  333.75   20.90
   2  -9  -9    5.20    2.57
   2  -9  -9    1.89    2.26
   2  -9  -8  157.06   12.96
   2  -9  -8  201.64   16.42
   2  -9  -8  197.27   17.31
   2  -9  -7  169.71   13.62
   2  -9  -7  210.34   17.16
   2  -9  -7  204.74   18.20
   2  -9  -6  112.28   10.78
   2  -9  -6  104.61   11.88
   2  -9  -6   85.29   11.68
   2  -9  -5 1627.04   53.19
   2  -9  -5 1181.57   54.84
   2  -9  -5 1480.19   55.40
   2  -9  -5 1146.59   49.14
   2  -9  -4   14.03    4.19
   2  -9  -4   11.77    4.27
   2  -9  -4    4.88    3.42
   2  -9  -4   11.09    3.66
   2  -9  -3 1546.97   55.57
   2  -9  -3 1508.03   62.78
   2  -9  -3 1381.34   56.14
   2  -9  -3 1524.51   56.99
   2  -9  -2  256.04   19.45
   2  -9  -2  271.01   17.85
   2  -9  -2  259.28   21.60
   2  -9  -2  279.30   19.04
   2  -9  -1  473.15   27.26
   2  -9  -1  475.49   25.03
   2  -9  -1  462.35   30.23
   2  -9  -1  473.26   26.37
   2  -9   0 1036.46   44.82
   2  -9   0 1038.09   42.38
   2  -9   0 1030.86   49.79
   2  -9   0 1073.63   44.62
   2  -9   1   -3.43    2.28
   2  -9   1   -1.13    2.59
   2  -9   1    1.10    1.70
   2  -9   2  317.47   20.19
   2  -9   2  295.21   23.90
   2  -9   2  312.89   20.47
   2  -9   3  199.22   19.08
   2  -9   3  201.21   15.65
   2  -9   4  267.88   22.77
   2  -9   4  255.90   17.53
  -2   9  -5  174.22   15.84
   2  -9   5  193.70   18.90
   2  -9   5  208.78   14.76
  -2   9  -6  134.54   13.77
  -2   9  -7  203.31   16.50
  -2   9  -8   51.86    7.77
   2  -9   8   49.44    6.32
  -2   9  -9  230.28   15.90
   2  -9   9  254.13   14.53
  -2   9 -10  104.75    9.23
   2  -9  10   97.39    7.74
  -2   9 -11   28.82    4.09
   2  -9  11   23.24    2.97
   2  -8 -14   96.51    7.55
   2  -8 -13  129.98   10.38
   2  -8 -12    2.04    2.54
   2  -8 -11  578.13   29.42
   2  -8 -10   11.20    4.05
   2  -8 -10   11.34    4.18
   2  -8  -9  259.75   19.09
   2  -8  -9  236.96   19.14
   2  -8  -8  433.17   23.25
   2  -8  -8  425.90   25.77
   2  -8  -8  396.40   26.39
   2  -8  -7   68.06    8.61
   2  -8  -7   65.16   10.11
   2  -8  -7   73.23   10.21
   2  -8  -7   66.46   10.00
   2  -8  -6  831.37   35.71
   2  -8  -6  811.09   38.78
   2  -8  -6  896.34   42.04
   2  -8  -6  794.25   40.28
   2  -8  -5   21.20    4.60
   2  -8  -5   25.20    6.42
   2  -8  -5   24.09    5.69
   2  -8  -5   21.65    5.77
   2  -8  -5   26.79    5.11
   2  -8  -4  544.48   26.61
   2  -8  -4  613.48   51.01
   2  -8  -4  542.66   31.69
   2  -8  -4  519.04   28.19
   2  -8  -4  511.42   30.03
   2  -8  -4  562.83   27.50
   2  -8  -3  922.65   37.48
   2  -8  -3  986.84   64.45
   2  -8  -3  847.38   38.46
   2  -8  -3  908.36   43.80
   2  -8  -3  900.25   38.47
   2  -8  -2  783.87   55.20
   2  -8  -2  698.47   31.15
   2  -8  -2  674.73   36.62
   2  -8  -2  659.21   31.85
   2  -8  -1  482.54   41.59
   2  -8  -1  445.80   28.80
   2  -8  -1  445.67   24.70
   2  -8   0   55.74    7.29
   2  -8   0   74.61    9.67
   2  -8   0   65.55    8.61
   2  -8   0   54.98    9.59
   2  -8   1  806.69   37.43
   2  -8   1  892.03   44.43
   2  -8   1  932.61   39.16
   2  -8   2  487.70   31.32
   2  -8   2  505.80   26.70
   2  -8   3  511.62   32.28
   2  -8   3  527.20   27.41
   2  -8   4  129.21   15.38
   2  -8   4  124.43   11.81
   2  -8   5   10.73    3.84
   2  -8   5   14.29    4.04
  -2   8  -6  822.52   39.55
   2  -8   6  838.62   44.10
  -2   8  -7   26.89    6.17
   2  -8   7   23.51    5.20
  -2   8  -8  142.27   13.69
   2  -8   8  126.77   11.96
  -2   8  -9  174.63   14.43
   2  -8   9  120.99   11.22
  -2   8 -10   29.49    5.57
   2  -8  10   27.27    4.75
  -2   8 -11  265.45   15.46
   2  -8  11  251.99   14.16
   2  -8  12    3.12    1.62
   2  -7 -15   73.30    5.83
   2  -7 -14  170.41   11.32
   2  -7 -13   27.01    5.41
   2  -7 -12  233.37   16.84
   2  -7 -12  222.28   15.88
   2  -7 -11  176.97   15.42
   2  -7 -11  193.52   15.40
   2  -7 -10  198.93   17.18
   2  -7 -10  222.77   17.14
   2  -7  -9  573.93   27.26
   2  -7  -9  548.89   30.81
   2  -7  -9  532.65   28.97
   2  -7  -8   90.33    9.78
   2  -7  -8   75.14   10.54
   2  -7  -8   72.55    9.75
   2  -7  -8   64.77    9.59
   2  -7  -7  165.68   13.32
   2  -7  -7  167.85   16.03
   2  -7  -7  181.13   16.42
   2  -7  -6   69.45    8.32
   2  -7  -6   66.39    9.14
   2  -7  -6   62.19    9.21
   2  -7  -6   63.30    9.27
   2  -7  -5 1088.63   47.54
   2  -7  -4  107.45   19.54
   2  -7  -3   28.23    9.90
   2  -7  -2  921.83   58.72
   2  -7  -1   47.11   11.70
   2  -7   0 1111.74   63.27
   2  -7   1  172.83   22.16
  -2   7  -2  591.94   52.59
  -2   7  -3 1089.73   78.42
   2  -7   3 1092.51   50.38
   2  -7   4   42.80    8.58
   2  -7   4   30.35    5.81
   2  -7   5  663.71   37.03
   2  -7   5  598.13   28.63
  -2   7  -6   82.51    9.42
   2  -7   6   85.71   12.30
   2  -7   6   90.91   10.69
  -2   7  -7  179.88   15.88
  -2   7  -7  175.22   14.24
  -2   7  -8  514.21   29.04
  -2   7  -8  496.66   26.48
   2  -7   8  523.68   28.32
  -2   7  -9   68.32    9.45
   2  -7   9   54.79    8.09
  -2   7 -10  245.31   17.57
   2  -7  10  246.36   17.27
  -2   7 -11   13.43    3.63
   2  -7  11   17.49    4.03
  -2   7 -12  146.08   10.66
   2  -7  12  156.61   10.90
   2  -7  13   73.38    6.03
   2  -6 -15  121.70    8.47
   2  -6 -14    1.37    1.94
   2  -6 -14    2.02    1.41
   2  -6 -13  355.01   20.15
   2  -6 -12  274.41   18.14
   2  -6 -12  266.04   18.31
   2  -6 -11  512.10   27.69
   2  -6 -11  434.17   25.79
   2  -6 -11  439.84   25.73
  -2   6  10  365.04   39.83
   2  -6 -10  300.89   21.74
   2  -6 -10  350.71   23.19
   2  -6 -10  369.04   22.92
   2  -6  -9    5.25    3.31
   2  -6  -9    5.25    2.88
   2  -6  -9    3.55    1.73
   2  -6  -8  920.51   38.31
   2  -6  -8  996.92   43.82
   2  -6  -8  925.34   42.77
   2  -6  -8  874.56   40.30
   2  -6  -7   65.75    8.07
   2  -6  -7   51.26   15.38
   2  -6  -7   86.07   10.89
   2  -6  -7   64.87    9.48
   2  -6  -7   68.22    9.14
   2  -6  -6  184.70   31.86
   2  -6  -5  556.10   53.76
   2  -6  -4   25.71   11.02
   2  -6  -4   37.92   11.88
   2  -6  -3 3221.72  122.36
   2  -6  -3 2381.89  123.29
   2  -6  -2   24.82   10.49
   2  -6  -2   53.21   12.32
   2  -6  -1  163.01   20.79
   2  -6  -1  151.68   23.73
   2  -6   0  608.50   41.68
   2  -6   0  605.04   48.11
  -2   6   0  653.76   44.89
  -2   6  -1  652.23   48.66
   2  -6   1  468.08   42.13
  -2   6  -2 1265.82   78.45
   2  -6   2 1419.28   67.77
   2  -6   3    4.63    2.79
  -2   6  -3    5.91    4.36
   2  -6   4  712.88   47.75
   2  -6   5  202.67   18.35
  -2   6  -6  219.46   16.25
   2  -6   6  222.14   19.62
   2  -6   6  227.88   17.65
  -2   6  -7  456.06   26.82
  -2   6  -7  430.52   24.81
   2  -6   7  471.66   27.41
  -2   6  -8   19.86    5.21
  -2   6  -8   14.71    4.39
   2  -6   8    8.61    3.42
  -2   6  -9  231.67   18.09
  -2   6  -9  202.23   16.18
   2  -6   9  251.35   18.98
  -2   6 -10   90.00   10.59
   2  -6  10   93.48   11.21
  -2   6 -11  142.35   12.61
   2  -6  11  121.10   12.36
  -2   6 -12   93.48    8.98
   2  -6  12   95.29    9.68
   2  -6  13    1.07    1.40
   2  -6  14   76.46    5.99
   2  -5 -15   19.80    3.48
   2  -5 -15   23.25    3.70
   2  -5 -14  280.34   16.53
   2  -5 -13  109.69   10.64
   2  -5 -12    2.72    1.81
   2  -5 -12    4.21    2.49
   2  -5 -11  570.63   28.93
   2  -5 -11  540.91   28.66
   2  -5 -10   30.70   15.88
   2  -5 -10   30.68    6.17
   2  -5 -10   33.70    6.89
   2  -5 -10   20.99    5.40
   2  -5  -9  715.78   72.22
   2  -5  -9  700.31   35.28
   2  -5  -9  632.90   33.49
   2  -5  -9  664.56   32.97
   2  -5  -8  182.06   13.69
   2  -5  -8  203.83   35.16
   2  -5  -8  177.33   15.93
   2  -5  -8  164.67   15.09
   2  -5  -8  174.02   14.79
   2  -5  -7   16.70    9.33
   2  -5  -6  803.85   68.60
   2  -5  -5  206.92   32.02
   2  -5  -4  145.74   25.48
   2  -5  -3  266.86   27.70
   2  -5  -3  240.47   31.09
   2  -5  -2  678.48   43.60
   2  -5  -2  627.27   50.12
  -2   5   1  512.34   32.32
   2  -5  -1  561.47   44.63
   2  -5  -1  562.55   37.37
  -2   5   0  195.52   21.46
   2  -5   0  185.70   20.19
   2  -5   0  229.67   26.93
  -2   5  -1 1288.94   70.06
   2  -5   1 1420.12   64.79
   2  -5   2   63.85   12.15
  -2   5  -2   64.23   15.25
  -2   5  -3  796.11   59.85
   2  -5   3  722.28   45.21
   2  -5   4   21.69    7.70
   2  -5   5   28.98    8.79
   2  -5   6   88.44   17.60
  -2   5  -7   30.02    6.01
  -2   5  -7   36.68    7.44
   2  -5   7   24.31    5.74
   2  -5   7   29.18   10.90
  -2   5  -8  270.91   19.57
  -2   5  -8  271.02   18.92
   2  -5   8  269.07   20.55
  -2   5  -9   72.07    9.79
  -2   5  -9   83.50   10.71
   2  -5   9   81.65   11.19
  -2   5 -10  174.59   15.13
   2  -5  10  177.47   16.45
  -2   5 -10  162.13   14.49
  -2   5 -11  188.04   14.99
   2  -5  11  169.59   15.57
  -2   5 -12    0.34    1.68
   2  -5  12    2.88    1.93
   2  -5  13  181.28   13.33
   2  -5  14    3.61    1.51
   2  -5  15   21.48    2.79
   2  -4 -16    1.97    1.11
   2  -4 -16    4.43    1.55
   2  -4 -15   65.61    6.57
   2  -4 -14  212.46   13.91
   2  -4 -14  179.75   13.23
   2  -4 -13   23.43    5.30
   2  -4 -13   25.11    5.22
   2  -4 -12  127.24   13.02
   2  -4 -12  154.94   13.65
   2  -4 -11    0.42    1.73
   2  -4 -11    7.15    3.11
   2  -4 -10   97.60   26.74
   2  -4 -10   98.36   11.12
   2  -4 -10   77.22   10.02
   2  -4  -9  588.55   65.17
   2  -4  -9  643.29   31.81
   2  -4  -9  576.08   30.22
   2  -4  -8  883.18   77.87
   2  -4  -7  615.61   61.53
   2  -4  -6   86.13   21.39
   2  -4  -5  918.85   69.58
   2  -4  -4  156.97   25.77
   2  -4  -3  776.15   47.19
   2  -4  -3  801.13   58.62
   2  -4  -2   18.24    9.56
   2  -4  -2   24.54    7.53
   2  -4  -1  322.20   31.17
  -2   4   1  304.45   20.27
  -2   4   0 2130.00   82.48
   2  -4   0 1852.40   76.73
  -2   4  -1   52.87   12.07
   2  -4   1   66.52   11.52
  -2   4  -2  587.93   44.75
   2  -4   2  655.79   39.16
  -2   4  -3  915.89   62.68
   2  -4   3 1059.17   54.42
   2  -4   4  338.31   29.84
   2  -4   5  910.87   55.00
   2  -4   6   85.43   16.45
   2  -4   7   76.76   16.70
  -2   4  -8  344.21   21.80
  -2   4  -8  342.35   22.08
   2  -4   8  321.32   23.26
   2  -4   8  385.85   39.35
  -2   4  -9  320.70   21.31
  -2   4  -9  298.80   20.36
   2  -4   9  279.87   21.77
   2  -4   9  290.34   35.85
  -2   4 -10  339.10   22.19
  -2   4 -10  353.06   22.37
   2  -4  10  321.18   23.71
   2  -4  10  392.30   42.03
  -2   4 -11   13.04    3.97
  -2   4 -11   25.21    5.68
   2  -4  11   31.81    6.73
  -2   4 -12  185.90   14.37
   2  -4  12  236.60   18.14
   2  -4  13  126.35   12.03
   2  -4  14  119.28   10.08
   2  -4  15   68.88    6.02
   2  -3 -16  100.33    6.94
   2  -3 -15  137.80   10.10
   2  -3 -14   13.10    3.64
   2  -3 -14   11.60    3.24
   2  -3 -13  194.31   15.82
   2  -3 -13  236.65   16.62
   2  -3 -12  196.97   15.88
  -2   3  11  778.74   62.95
   2  -3 -11  728.77   34.99
   2  -3 -10  190.41   38.23
   2  -3 -10  187.53   15.51
   2  -3  -9  110.52   27.26
   2  -3  -9   92.25   10.46
   2  -3  -8  850.42   76.47
   2  -3  -7   63.98   19.59
   2  -3  -6 1085.37   79.19
   2  -3  -5  934.94   69.11
   2  -3  -4  729.66   56.70
   2  -3  -3 1791.05   91.39
   2  -3  -2  150.17   22.01
   2  -3  -2  158.59   17.09
   2  -3  -1 1411.02   57.89
   2  -3  -1 1404.21   70.37
  -2   3   0   85.44   11.10
   2  -3   0   91.16   15.48
   2  -3   0   73.82   11.81
   2  -3   0   84.78   10.35
   2  -3   1  109.07   13.79
  -2   3  -1  101.97   14.67
  -2   3  -2 1960.78   89.41
   2  -3   2 2104.77   81.42
   2  -3   3  270.54   24.24
   2  -3   4 1746.28   77.78
   2  -3   5  525.70   39.46
   2  -3   6  818.57   53.94
   2  -3   7  784.13   55.16
   2  -3   8  112.43   20.43
  -2   3  -8  102.60   11.06
  -2   3  -8  114.07   11.67
  -2   3  -9  287.77   19.88
  -2   3  -9  300.05   20.20
   2  -3   9  302.40   22.80
   2  -3   9  297.84   35.66
  -2   3 -10   29.02    6.44
  -2   3 -10   13.10    3.31
   2  -3  10   18.08   10.11
   2  -3  10   28.03    8.01
  -2   3 -11  203.67   16.17
   2  -3  11  270.21   21.14
  -2   3 -11  246.51   18.10
  -2   3 -12  219.60   15.72
   2  -3  12  192.49   17.42
   2  -3  13   34.71    6.32
   2  -3  14  220.85   15.29
   2  -3  15   -0.78    1.77
   2  -3  16  134.00    7.49
   2  -2 -16   73.21    5.87
   2  -2 -15   -0.07    1.01
   2  -2 -15    2.57    2.02
   2  -2 -14  260.92   16.54
   2  -2 -13   39.97    6.58
   2  -2 -12  295.86   19.88
  -2   2  11  150.23   27.01
   2  -2 -11  143.44   13.48
  -2   2  10   -3.47    7.29
   2  -2 -10   -2.51    6.88
   2  -2 -10    5.54    3.23
   2  -2  -9  734.79   73.91
   2  -2  -8   18.02   14.00
   2  -2  -7  435.54   50.56
   2  -2  -6 1852.60  107.76
   2  -2  -5  265.78   35.37
   2  -2  -4 1291.79   78.02
   2  -2  -3   85.12   17.64
   2  -2  -2  293.28   28.93
   2  -2  -1 1128.03   58.90
   2  -2   0  196.08   12.89
   2  -2   0  115.34   13.56
   2  -2   1  608.13   33.60
   2  -2   2  148.60   15.99
   2  -2   3 3080.27  110.43
   2  -2   4   17.01    6.73
   2  -2   5 2417.46  100.09
   2  -2   6   48.66   12.53
   2  -2   7  268.57   30.63
   2  -2   8 2290.28  109.51
   2  -2   9   11.42    6.55
  -2   2  -9   14.26    4.00
  -2   2  -9   13.31    4.31
  -2   2  -9   15.65    4.47
   2  -2  10  393.25   42.53
  -2   2 -10  404.38   24.42
  -2   2 -10  421.67   24.11
  -2   2 -10  387.91   24.24
  -2   2 -11  221.12   17.15
  -2   2 -11  213.86   16.24
   2  -2  11  202.36   30.61
   2  -2  11  221.65   19.60
   2  -2  12   27.33    6.70
   2  -2  13  260.30   19.57
   2  -2  14    4.20    2.54
   2  -2  15   46.39    5.91
   2  -2  16   43.50    4.53
  -2   2 -16   43.19    4.24
   2  -1 -16   53.71    4.93
   2  -1 -15  211.47   13.16
   2  -1 -15  215.94   13.10
   2  -1 -14   11.02    3.64
   2  -1 -13  225.16   16.50
   2  -1 -12  188.95   15.46
  -2   1  11   19.30    9.89
   2  -1 -11   24.68    5.61
  -2   1  10  445.05   45.80
   2  -1 -10  454.94   26.10
   2  -1  -9  150.74   32.01
   2  -1  -8  799.71   73.00
   2  -1  -7 1356.09   93.47
   2  -1  -6  458.76   48.71
   2  -1  -5 3666.46  157.73
   2  -1  -4 1243.90   74.63
   2  -1  -3  478.17   40.49
   2  -1  -2  117.36   17.42
   2  -1  -2  146.66    8.85
   2  -1  -1  178.76    8.51
   2  -1  -1  173.59   19.35
   2  -1   0 1352.39   54.54
   2  -1   1   36.10    7.28
   2  -1   2 6429.89  194.64
   2  -1   3 3732.59  126.16
   2  -1   4  453.01   32.55
   2  -1   5 3398.19  126.82
   2  -1   6   97.68   16.54
   2  -1   7 1744.96   87.37
   2  -1   8   49.92   13.52
   2  -1   9  252.92   31.98
  -2   1  -9  250.38   17.62
  -2   1  -9  256.09   18.07
   2  -1  10  605.04   53.44
  -2   1 -10  635.11   31.79
  -2   1 -10  609.42   31.63
   2  -1  11  168.38   28.05
  -2   1 -11  163.59   14.45
  -2   1 -11  156.37   14.43
   2  -1  12  118.06   13.81
   2  -1  13  106.29   12.61
   2  -1  14  127.77   12.55
   2  -1  15   52.66    6.70
  -2   1 -15   59.78    6.58
   2  -1  16   41.08    4.69
  -2   1 -16   37.44    4.17
   2   0 -16  144.00    8.36
   2   0 -15   84.02    7.53
   2   0 -14  128.19   10.99
   2   0 -13  760.17   34.13
  -2   0  12    6.10    1.95
   2   0 -12    2.83    2.62
  -2   0  11  424.17   45.50
  -2   0  11  404.30   23.69
   2   0 -11  312.66   21.57
  -2   0  10   76.95   18.58
  -2   0  10   73.81    9.49
   2   0  -9  563.21   63.31
  -2   0   9  550.77   49.66
   2   0  -8  140.40   29.57
   2   0  -7  292.11   40.60
   2   0  -6 1188.83   81.33
   2   0  -5  461.37   36.49
   2   0  -5  466.88   45.35
   2   0  -4 2875.68  106.84
   2   0  -4 2720.00  122.43
   2   0  -3 2816.67   97.88
   2   0  -3 2634.17  113.30
   2   0  -2   52.80   11.76
   2   0  -2   61.31    8.11
   2   0  -1 5147.70  171.87
   2   0  -1 5511.42  157.20
   2   0   0 1472.16   59.17
   2   0   0 1366.09   53.50
   2   0   1  400.99   23.22
   2   0   2 5951.22  178.93
   2   0   3 1904.49   73.73
   2   0   4 2376.07   91.68
   2   0   5   42.76   10.22
   2   0   6  843.87   52.31
   2   0   7  987.36   61.04
   2   0   8 1472.43   81.62
   2   0   9  211.45   29.08
   2   0  10   -5.50    6.59
  -2   0 -10    3.28    3.08
  -2   0 -10    3.98    2.69
   2   0  11  406.43   44.38
  -2   0 -11  420.90   24.23
  -2   0 -11  393.94   24.20
  -2   0 -12  199.40   16.08
   2   0  13  175.43   16.43
   2   0  14  145.13   13.89
   2   0  15    5.86    2.59
  -2   0 -15    6.39    2.54
   2   0  16  215.16   12.21
  -2   0 -16  235.33   12.27
   2   1 -16   68.95    5.22
   2   1 -15   -2.01    1.41
  -2  -1  14  384.81   18.44
   2   1 -14  400.60   20.13
  -2  -1  13   23.83    4.79
   2   1 -13   19.50    4.72
  -2  -1  12  111.94   11.56
   2   1 -12   94.41   10.99
  -2  -1  11    7.32    5.16
  -2  -1  11    8.87    3.33
  -2  -1  10  244.77   33.37
  -2  -1  10  166.58   15.21
  -2  -1   9  158.69   25.96
  -2  -1   9  164.52   14.70
   2   1  -8   29.74   13.45
   2   1  -7  224.38   35.13
   2   1  -6    7.70    7.62
   2   1  -6   12.56    8.64
   2   1  -5 1671.30   83.40
   2   1  -5 1568.33   90.25
   2   1  -4  674.53   44.53
   2   1  -4  639.10   49.42
   2   1  -3   15.04    7.71
   2   1  -3   20.19    6.55
   2   1  -2  546.71   32.15
   2   1  -2  469.70   34.70
   2   1  -1 1584.74   67.97
   2   1  -1 1813.01   65.77
   2   1   0 1713.19   62.78
   2   1   0 1601.60   57.91
   2   1   1 2080.42   70.18
   2   1   2  789.20   34.31
  -2  -1  -2  604.53   29.17
   2   1   3  113.52   13.16
  -2  -1  -3  100.31   11.17
   2   1   4  226.08   20.79
   2   1   5  955.57   51.97
   2   1   6  438.17   35.85
   2   1   7  192.47   24.80
   2   1   8  986.62   63.62
   2   1   9   81.71   17.68
   2   1  10 1335.07   82.41
  -2  -1 -10 1322.29   50.72
  -2  -1 -10 1286.25   51.38
   2   1  11   62.85   16.43
  -2  -1 -11   55.21    8.40
  -2  -1 -11   63.76    8.61
  -2  -1 -12  122.34   12.49
  -2  -1 -13  280.00   18.48
   2   1  14    8.37    3.90
  -2  -1 -14   11.56    3.90
   2   1  15  212.50   14.80
  -2  -1 -15  246.29   14.95
   2   1  16   17.32    3.14
  -2  -1 -16   12.62    2.74
   2   2 -15   97.17    7.23
   2   2 -15  109.81    8.00
  -2  -2  14   17.65    3.53
   2   2 -14   16.80    3.62
  -2  -2  13   68.48    8.15
   2   2 -13   70.13    8.63
  -2  -2  12  136.05   12.92
  -2  -2  11   48.36    8.03
  -2  -2  10  233.10   32.15
  -2  -2  10  198.63   16.72
  -2  -2   9  155.97   25.37
  -2  -2   9  137.10   13.75
  -2  -2   8  299.51   33.99
   2   2  -7 1285.56   89.01
  -2  -2   7 1304.25   73.08
   2   2  -7 1254.14   83.49
   2   2  -6   16.84    8.58
   2   2  -6   14.36    9.69
   2   2  -5  823.49   58.97
   2   2  -5  957.15   65.10
   2   2  -4   30.09   11.63
   2   2  -4   28.01   10.00
   2   2  -3 1787.20   81.66
   2   2  -3 1761.31   82.42
   2   2  -2 2347.74   92.59
   2   2  -2 2287.03   91.12
   2   2  -1 1542.25   69.24
   2   2  -1 1902.24   69.28
   2   2   0 1614.25   68.44
   2   2   0 1795.96   62.16
   2   2   1  708.19   29.41
   2   2   2 4212.65  127.93
   2   2   3    0.24    2.44
  -2  -2  -3    4.05    3.59
   2   2   4  321.38   24.45
  -2  -2  -4  273.45   23.19
   2   2   5 1467.28   67.02
   2   2   6   82.05   15.05
   2   2   7 1170.95   65.88
   2   2   8   74.63   16.80
   2   2   9  423.04   41.11
   2   2  10   53.14   14.44
  -2  -2 -10   66.64    8.31
   2   2  11  139.54   25.55
  -2  -2 -11  147.00   13.66
  -2  -2 -12  326.49   20.86
  -2  -2 -13    1.04    2.02
  -2  -2 -13    1.75    3.00
   2   2  14  241.14   17.96
  -2  -2 -14  298.55   18.53
   2   2  15   53.90    6.75
  -2  -2 -15   55.31    6.74
   2   2  16  114.93    8.43
  -2  -2 -16  128.32    8.95
  -2  -3  15   25.38    3.16
   2   3 -15   30.81    3.80
  -2  -3  14   46.53    5.75
   2   3 -14   48.44    6.11
  -2  -3  13  302.31   18.46
   2   3 -13  329.33   19.61
  -2  -3  12   -2.16    1.84
  -2  -3  11  334.59   22.27
  -2  -3  10  170.52   15.77
  -2  -3  10  186.72   28.36
  -2  -3   9  721.36   35.26
  -2  -3   9  556.77   50.11
   2   3  -8  192.33   15.58
  -2  -3   8  171.95   15.45
  -2  -3   8  185.50   26.21
  -2  -3   7    7.99    7.12
   2   3  -7    5.30    4.29
  -2  -3   6 1609.46   78.02
   2   3  -6 1533.40   94.01
   2   3  -5  207.96   28.04
   2   3  -5  199.87   29.22
   2   3  -4 1137.72   66.30
   2   3  -4 1023.29   66.56
   2   3  -3 1216.88   63.13
   2   3  -3 1154.84   66.88
   2   3  -2  827.76   51.83
   2   3  -2  855.24   45.28
   2   3  -1 2299.27   96.64
   2   3  -1 2448.20   82.71
   2   3   0   20.34    3.32
   2   3   0   14.61    7.24
   2   3   1 1050.03   53.81
   2   3   1  998.90   34.84
   2   3   1 1017.59   32.86
   2   3   2   67.97    7.54
   2   3   3  188.58   15.41
  -2  -3  -3  155.95   18.10
   2   3   4  933.85   44.69
  -2  -3  -4  843.15   47.92
   2   3   5    6.24    3.55
  -2  -3  -5    2.31    3.42
   2   3   6 1627.42   75.44
   2   3   7   -2.76    5.52
   2   3   8  578.67   46.08
   2   3   9  334.49   36.16
   2   3  10   11.69    9.06
  -2  -3 -10   14.52    3.74
   2   3  11  268.61   35.43
  -2  -3 -11  312.44   21.08
  -2  -3 -11  311.29   20.20
  -2  -3 -12   19.66    4.79
  -2  -3 -12   21.16    5.13
  -2  -3 -13  162.81   13.24
  -2  -3 -13  230.43   16.87
   2   3  14  109.35   11.19
  -2  -3 -14  113.88    9.71
  -2  -3 -14  118.45   11.19
   2   3  15   87.73    8.80
  -2  -3 -15  103.01    9.43
   2   3  16   62.66    5.71
  -2  -3 -16   74.01    6.64
   2   4 -15   59.07    4.81
  -2  -4  14   92.54    7.67
   2   4 -14   90.38    7.94
  -2  -4  13   -0.03    1.78
   2   4 -13    2.27    1.75
  -2  -4  12  406.73   23.28
  -2  -4  11   40.76    6.95
  -2  -4  10  316.22   21.95
   2   4  -9  216.44   17.58
  -2  -4   9  203.43   17.46
   2   4  -8    2.35    2.33
  -2  -4   8   -1.22    2.39
   2   4  -8   -3.07    7.98
  -2  -4   8    4.16    2.40
  -2  -4   7 1537.58   80.13
   2   4  -7 1668.59  106.80
   2   4  -6   19.62   12.26
  -2  -4   6   26.80    9.43
  -2  -4   5  159.25   19.78
   2   4  -5  210.20   31.63
   2   4  -4   85.49   18.68
  -2  -4   4   67.53   11.25
  -2  -4   3 1060.65   46.41
   2   4  -3  977.96   65.80
  -2  -4   2  881.28   36.09
   2   4  -2  842.71   57.00
  -2  -4   1  858.22   27.83
   2   4  -1  798.30   52.98
   2   4   0 1084.86   60.33
   2   4   1  881.12   52.83
   2   4   2 3101.61   91.49
   2   4   2 3288.46  123.11
   2   4   3 1625.52   58.76
  -2  -4  -4  104.30   16.21
   2   4   4  104.33   12.52
  -2  -4  -5 1298.83   68.05
   2   4   5 1257.08   58.84
   2   4   6    3.56    4.29
  -2  -4  -6   -1.51    4.11
   2   4   7  609.78   43.63
   2   4   8 1086.54   64.99
   2   4   9    2.35    6.15
  -2  -4  -9    5.62    3.08
  -2  -4  -9    5.97    2.12
   2   4  10  880.94   63.02
  -2  -4 -10  845.63   36.82
  -2  -4 -10  883.96   39.69
   2   4  11   -2.63    5.93
  -2  -4 -11    8.01    3.23
  -2  -4 -11   -2.44    2.24
  -2  -4 -12  278.38   18.65
  -2  -4 -12  293.96   20.58
  -2  -4 -13  163.28   12.67
  -2  -4 -13  145.83   13.56
  -2  -4 -14  126.36   10.83
  -2  -4 -14  108.60   10.72
   2   4  15  127.02    9.97
  -2  -4 -15  130.22   10.56
  -2  -4 -16   -0.36    1.02
  -2  -5  14   -0.13    1.05
   2   5 -14    3.13    1.71
  -2  -5  13  258.34   15.25
   2   5 -13  248.26   15.53
  -2  -5  12   40.29    6.53
  -2  -5  11   74.33    9.53
  -2  -5  10  578.86   31.33
   2   5  -9   74.69    9.94
  -2  -5   9   73.92   10.39
   2   5  -8  678.60   33.97
  -2  -5   8  641.72   33.92
   2   5  -8  573.07   64.52
   2   5  -7  119.66   12.44
   2   5  -7  100.43   24.98
  -2  -5   7  104.21   11.96
   2   5  -6  609.09   61.73
   2   5  -5  376.07   45.46
   2   5  -4  266.93   36.13
   2   5  -3 1722.40   96.47
   2   5  -2   76.01   17.31
   2   5  -1 2384.54  109.94
   2   5   0 3309.42  134.40
   2   5   1 1326.51   72.11
   2   5   2 3281.95  131.29
   2   5   3    1.74    4.06
   2   5   4  999.04   43.41
  -2  -5  -4  957.31   58.92
   2   5   5 1129.86   52.87
  -2  -5  -5 1123.31   65.94
  -2  -5  -6 1170.02   69.38
   2   5   6 1148.88   58.07
   2   5   7  645.64   44.16
  -2  -5  -7  645.79   50.98
   2   5   8  155.52   22.06
  -2  -5  -9  673.58   31.76
  -2  -5  -9  656.98   30.86
   2   5   9  707.70   52.11
  -2  -5  -9  671.69   31.81
  -2  -5  -9  696.44   31.58
  -2  -5  -9  658.58   32.86
  -2  -5 -10  110.61   11.09
   2   5  10  111.30   20.79
  -2  -5 -10  106.68   11.09
  -2  -5 -10  113.69   12.16
   2   5  11  168.61   26.64
  -2  -5 -11  125.24   11.80
  -2  -5 -11  144.42   13.78
  -2  -5 -12  281.60   19.24
  -2  -5 -12  357.59   22.27
  -2  -5 -13   20.16    5.45
  -2  -5 -14  296.03   17.78
  -2  -5 -14  284.88   18.03
  -2  -5 -15   18.86    4.09
  -2  -5 -16  177.71   10.31
  -2  -6  14  117.66    7.19
   2   6 -14  111.11    7.38
  -2  -6  13   76.71    7.18
   2   6 -13   89.88    8.10
  -2  -6  12   59.63    7.36
  -2  -6  11  282.96   19.05
  -2  -6  10   14.57    4.74
   2   6  -9  423.48   25.69
  -2  -6   9  387.19   24.94
   2   6  -8  270.68   19.83
  -2  -6   8  244.92   19.27
   2   6  -8  240.27   41.54
   2   6  -7  644.51   33.04
  -2  -6   7  649.09   33.55
   2   6  -7  597.10   65.33
   2   6  -6  404.43   24.40
   2   6  -6  383.88   50.39
  -2  -6   6  387.78   24.40
   2   6  -5   -6.22    7.36
   2   6  -4  971.91   75.78
   2   6  -3   42.91   13.16
   2   6  -2 1272.08   81.70
   2   6  -1  315.07   36.43
   2   6   0  576.01   48.82
   2   6   1 1464.69   81.77
   2   6   2  231.30   28.53
   2   6   3 1117.75   68.40
   2   6   4  264.07   31.74
  -2  -6  -4  259.52   30.45
   2   6   5  499.89   43.92
  -2  -6  -5  463.95   42.86
  -2  -6  -6 1442.81   82.41
  -2  -6  -7  162.11   26.36
  -2  -6  -8  485.55   24.86
  -2  -6  -8  473.02   25.55
  -2  -6  -8  484.59   25.70
  -2  -6  -8  485.49   26.77
  -2  -6  -8  466.93   26.38
  -2  -6  -9  294.14   19.17
  -2  -6  -9  259.55   17.75
  -2  -6  -9  266.95   18.43
  -2  -6  -9  272.05   19.52
  -2  -6  -9  289.42   20.22
  -2  -6 -10  235.04   16.75
  -2  -6 -10  230.33   16.69
  -2  -6 -10  220.23   17.66
  -2  -6 -11  323.52   20.13
  -2  -6 -11  336.98   20.47
  -2  -6 -11  343.54   22.10
  -2  -6 -12    4.89    2.50
  -2  -6 -12    5.07    3.11
  -2  -6 -13  417.07   21.82
  -2  -6 -13  364.81   22.34
  -2  -6 -13  369.20   22.22
  -2  -6 -14   19.15    4.63
  -2  -6 -14   14.24    3.51
  -2  -6 -15  202.86   12.00
  -2  -6 -15  185.24   12.15
  -2  -7  13   55.36    5.27
   2   7 -13   54.93    5.50
  -2  -7  12  191.33   12.55
  -2  -7  11    0.79    2.28
  -2  -7  10  252.53   18.04
   2   7  -9  179.85   15.85
  -2  -7   9  165.10   15.14
   2   7  -8  171.69   15.46
  -2  -7   8  174.70   15.71
   2   7  -7  458.18   27.26
  -2  -7   7  487.66   27.91
   2   7  -7  406.87   54.83
   2   7  -6   41.75    7.34
  -2  -7   6   55.14    8.88
   2   7  -6   33.95   16.18
   2   7  -5  789.27   36.93
   2   7  -5  728.68   71.03
  -2  -7   5  816.43   37.87
   2   7  -4   24.95   11.13
  -2  -7   4   35.71    6.75
   2   7  -3  458.70   51.46
   2   7  -2   71.64   19.19
   2   7  -1   86.45   21.34
   2   7   0  500.54   48.69
   2   7   1  104.50   21.71
   2   7   2  729.85   56.91
   2   7   3  260.17   32.39
  -2  -7  -3  282.63   33.02
  -2  -7  -4   93.72   18.99
   2   7   4   97.64   19.46
   2   7   5 1239.47   76.66
  -2  -7  -5 1255.96   77.86
   2   7   6   -0.62    4.04
  -2  -7  -6    7.43    6.92
  -2  -7  -7  384.59   21.78
  -2  -7  -7  411.56   23.26
   2   7   7  412.49   43.06
  -2  -7  -7  415.88   43.80
  -2  -7  -7  405.89   24.27
  -2  -7  -7  381.54   23.45
  -2  -7  -8  425.24   24.08
  -2  -7  -8  420.71   23.22
  -2  -7  -8  403.32   24.78
  -2  -7  -8  392.17   23.02
  -2  -7  -8  406.73   24.67
  -2  -7  -9  250.14   17.94
  -2  -7  -9  244.29   17.21
  -2  -7  -9  261.30   18.04
  -2  -7  -9  263.27   19.26
  -2  -7  -9  248.27   18.92
  -2  -7 -10  638.88   30.71
  -2  -7 -10  644.49   31.52
  -2  -7 -10  645.91   32.92
  -2  -7 -10  639.76   31.23
  -2  -7 -10  625.33   32.68
  -2  -7 -11   42.30    6.76
  -2  -7 -11   36.08    6.60
  -2  -7 -11   46.47    7.87
  -2  -7 -12  588.50   30.26
  -2  -7 -12  584.47   29.14
  -2  -7 -13    0.30    2.19
  -2  -7 -13    5.71    2.40
  -2  -7 -14   86.35    8.60
  -2  -7 -14   85.86    7.74
  -2  -7 -14   85.71    8.61
  -2  -7 -15  162.50   10.38
  -2  -8  12    8.05    2.21
  -2  -8  11  128.18   10.24
  -2  -8  10  153.69   12.63
  -2  -8   9   68.58    8.98
   2   8  -8  624.70   33.11
  -2  -8   8  680.67   33.37
   2   8  -7    1.30    2.34
  -2  -8   7   -0.13    4.08
   2   8  -6  517.33   28.95
  -2  -8   6  549.62   29.77
   2   8  -6  576.32   65.13
   2   8  -5  188.16   15.80
  -2  -8   5  202.38   16.47
   2   8  -5  166.33   33.51
   2   8  -4  108.71   11.55
  -2  -8   4  130.64   12.83
   2   8  -4  124.79   27.18
   2   8  -3  719.63   33.95
  -2  -8   3  770.17   35.29
   2   8  -3  749.08   69.85
   2   8  -2   -4.84    6.07
   2   8  -1  555.51   56.19
   2   8   0  108.07   23.02
   2   8   1  650.72   57.69
   2   8   2   79.54   19.61
   2   8   3    4.02    5.62
  -2  -8  -3   20.12   10.93
   2   8   4  795.15   62.03
  -2  -8  -4  868.29   64.15
  -2  -8  -5  106.66   10.28
  -2  -8  -5  105.75   10.69
  -2  -8  -5  112.99   12.29
   2   8   5  124.50   23.97
  -2  -8  -5  108.74   21.80
  -2  -8  -6  567.63   27.49
  -2  -8  -6  535.56   27.81
  -2  -8  -6  540.83   28.77
  -2  -8  -6  512.62   29.02
  -2  -8  -6  604.02   53.51
   2   8   6  553.94   50.31
  -2  -8  -7  562.90   29.03
  -2  -8  -7  560.55   29.13
  -2  -8  -7  578.02   28.23
  -2  -8  -7  528.33   29.82
  -2  -8  -7  627.02   55.38
  -2  -8  -8  251.16   17.27
  -2  -8  -8  241.26   17.68
  -2  -8  -8  229.49   18.15
  -2  -8  -9  396.49   22.84
  -2  -8  -9  401.88   24.04
  -2  -8  -9  414.17   23.64
  -2  -8  -9  412.07   25.47
  -2  -8 -10   40.93    6.74
  -2  -8 -10   41.69    6.99
  -2  -8 -10   31.91    6.19
  -2  -8 -10   37.41    7.60
  -2  -8 -11   78.46   10.30
  -2  -8 -11   65.90    9.31
  -2  -8 -11   81.77    9.57
  -2  -8 -12  244.22   16.70
  -2  -8 -12  241.95   17.99
  -2  -8 -13    9.54    3.37
  -2  -8 -13    4.21    1.55
  -2  -8 -14  139.56   10.72
  -2  -8 -14  143.71    9.61
  -2  -8 -15   20.13    3.16
  -2  -9  12   68.09    5.06
   2   9 -12   71.07    5.41
  -2  -9  11   18.39    3.26
  -2  -9  10   38.14    5.43
  -2  -9   9  174.71   13.45
   2   9  -8   78.52    9.44
  -2  -9   8   77.42    9.15
   2   9  -7  251.08   18.31
  -2  -9   7  265.22   18.73
   2   9  -6  219.57   17.27
  -2  -9   6  238.34   17.86
   2   9  -5   12.07    3.75
  -2  -9   5    8.90    3.91
   2   9  -4  219.46   16.60
  -2  -9   4  213.21   16.71
   2   9  -4  179.27   35.43
   2   9  -3   -3.64    3.16
  -2  -9   3    0.33    1.67
   2   9  -3   -4.30    5.65
  -2  -9   2  811.46   36.58
   2   9  -2  741.13   71.12
  -2  -9   1   50.88    7.46
   2   9  -1   48.72   18.89
  -2  -9   0  140.08   12.53
   2   9   0  135.46   27.56
  -2  -9  -1  593.72   31.70
  -2  -9  -1  619.24   29.37
  -2  -9  -1  601.12   29.18
   2   9   1  592.36   57.43
  -2  -9  -2   13.67    4.45
  -2  -9  -2   16.08    3.96
   2   9   2   26.43   10.80
  -2  -9  -3  539.81   29.95
   2   9   3  576.15   54.16
  -2  -9  -3  544.65   27.41
  -2  -9  -3  617.90   55.00
  -2  -9  -4   54.59    7.63
  -2  -9  -4   53.61    8.41
  -2  -9  -4   61.27    8.83
   2   9   4   57.00   17.46
  -2  -9  -4   47.97    7.15
  -2  -9  -4   59.76   15.68
  -2  -9  -5  207.96   17.04
  -2  -9  -5  178.74   14.66
  -2  -9  -5  171.28   14.19
  -2  -9  -5  174.74   15.78
  -2  -9  -5  186.40   16.24
  -2  -9  -5  162.69   28.01
  -2  -9  -6  719.99   32.87
  -2  -9  -6  707.66   35.45
  -2  -9  -6  733.89   34.07
  -2  -9  -6  671.27   35.42
  -2  -9  -6  746.28   36.88
  -2  -9  -6  808.31   64.96
  -2  -9  -7  222.66   18.07
  -2  -9  -7  308.64   19.41
  -2  -9  -7  303.47   19.84
  -2  -9  -7  275.55   20.41
  -2  -9  -7  310.31   22.00
  -2  -9  -7  324.17   40.28
  -2  -9  -8  225.67   17.06
  -2  -9  -8  244.87   16.80
  -2  -9  -8  174.87   15.25
  -2  -9  -8  229.01   18.25
  -2  -9  -8  234.65   19.15
  -2  -9  -9    9.71    3.82
  -2  -9  -9   17.19    4.77
  -2  -9  -9    9.72    4.26
  -2  -9  -9    7.27    2.92
  -2  -9 -10  155.78   13.14
  -2  -9 -10  155.83   13.03
  -2  -9 -10  151.96   14.88
  -2  -9 -10  150.24   13.75
  -2  -9 -11   68.52    9.61
  -2  -9 -11   70.25    8.85
  -2  -9 -11   67.36    7.95
  -2  -9 -12  187.67   14.94
  -2  -9 -12  171.83   13.13
  -2  -9 -13  252.23   14.66
  -2  -9 -13  253.89   16.14
  -2  -9 -14    3.34    1.69
  -2  -9 -15   88.83    6.23
  -2 -10  11    2.14    0.69
  -2 -10  10   73.53    6.42
  -2 -10   9    0.07    1.69
  -2 -10   8   51.70    6.76
   2  10  -7   77.25    8.98
  -2 -10   7   88.51    9.40
   2  10  -6    7.19    2.98
  -2 -10   6    1.27    2.05
   2  10  -5  284.28   18.98
  -2 -10   5  271.05   18.64
   2  10  -4   20.11    5.24
  -2 -10   4   10.99    4.25
  -2 -10   3  366.55   22.20
  -2 -10   2  247.55   17.60
   2  10  -2  293.94   44.93
  -2 -10   1   68.79    8.93
  -2 -10   1   85.67    9.71
   2  10  -1   85.39   23.32
  -2 -10   0  439.77   24.88
   2  10   0  560.98   59.94
  -2 -10   0  551.32   27.28
   2  10   1   -6.28   11.87
  -2 -10  -1   11.45    3.96
  -2 -10  -2  117.72   13.35
  -2 -10  -2  119.30   11.63
   2  10   2  136.11   27.80
  -2 -10  -2  143.48   26.41
  -2 -10  -3  399.37   25.72
  -2 -10  -3  410.97   23.24
  -2 -10  -3  459.96   48.29
  -2 -10  -4  666.19   34.82
  -2 -10  -4  672.95   31.74
  -2 -10  -4  649.46   58.40
  -2 -10  -5   67.60    8.60
  -2 -10  -5   58.29    9.08
  -2 -10  -5   37.67    7.01
  -2 -10  -5   59.67   16.33
  -2 -10  -6    0.70    2.58
  -2 -10  -6   11.78    4.65
  -2 -10  -6    1.79    3.15
  -2 -10  -6    8.23    3.67
  -2 -10  -7  580.11   28.20
  -2 -10  -7  473.68   27.85
  -2 -10  -7  570.83   30.65
  -2 -10  -7  576.25   31.46
  -2 -10  -8   87.65    9.59
  -2 -10  -8   69.09    9.14
  -2 -10  -8   85.19   10.81
  -2 -10  -8   84.78   11.09
  -2 -10  -9  437.84   23.67
  -2 -10  -9  462.66   24.26
  -2 -10  -9  421.95   25.26
  -2 -10  -9  448.46   26.77
  -2 -10 -10   35.73    5.84
  -2 -10 -10   32.50    6.51
  -2 -10 -10   29.97    6.29
  -2 -10 -10   34.91    5.67
  -2 -10 -11  205.33   13.54
  -2 -10 -11  187.60   14.17
  -2 -10 -11  188.75   15.09
  -2 -10 -12  446.57   21.74
  -2 -10 -12  464.37   23.71
  -2 -10 -13    1.15    1.26
  -2 -10 -14   70.51    6.19
  -2 -11   9   76.39    6.06
  -2 -11   8  179.83   11.23
  -2 -11   7   99.26    8.81
   2  11  -6   98.81    9.34
  -2 -11   6  101.05    9.52
   2  11  -5   32.34    5.75
  -2 -11   5   24.64    4.67
  -2 -11   4  232.85   16.17
  -2 -11   3  369.09   21.34
  -2 -11   2   30.82    6.00
  -2 -11   2   40.90    6.76
  -2 -11   1  196.39   14.98
  -2 -11   1  261.41   17.57
  -2 -11   0   21.33    4.93
  -2 -11  -1  437.28   24.35
  -2 -11  -2  102.69   10.87
  -2 -11  -3  134.01   12.35
  -2 -11  -4  178.02   14.50
  -2 -11  -4  159.54   15.28
  -2 -11  -5   45.80    7.92
  -2 -11  -5   30.37    6.21
  -2 -11  -5   56.40    7.78
  -2 -11  -6  574.57   29.97
  -2 -11  -6  584.68   27.71
  -2 -11  -7   16.19    4.78
  -2 -11  -7   15.58    4.76
  -2 -11  -7   14.94    4.24
  -2 -11  -8   67.82    8.08
  -2 -11  -8   57.67    7.81
  -2 -11  -8   56.07    8.49
  -2 -11  -9  302.08   17.91
  -2 -11  -9  289.69   17.39
  -2 -11  -9  284.68   17.29
  -2 -11  -9  270.91   19.19
  -2 -11 -10   21.26    4.78
  -2 -11 -10   22.76    4.43
  -2 -11 -10   13.90    3.37
  -2 -11 -11  151.14   10.31
  -2 -11 -11  145.34   12.17
  -2 -11 -12   10.67    3.04
  -2 -11 -13   88.96    7.92
  -2 -12   8    3.90    1.30
  -2 -12   7  142.19    8.85
  -2 -12   7  144.43    9.16
  -2 -12   6   38.87    4.85
  -2 -12   6   46.98    5.47
  -2 -12   5  227.74   13.54
  -2 -12   5  215.92   13.71
  -2 -12   4   35.41    5.31
  -2 -12   4   51.63    6.79
  -2 -12   3    7.41    2.56
  -2 -12   3    7.15    3.26
  -2 -12   2  579.00   26.07
  -2 -12   2  520.23   26.42
  -2 -12   1    4.19    2.73
  -2 -12   0  247.46   16.86
  -2 -12  -1   75.59    8.85
  -2 -12  -2   29.39    6.14
  -2 -12  -3  669.62   31.08
  -2 -12  -4    1.06    2.16
  -2 -12  -5  175.15   13.62
  -2 -12  -6   89.55    9.28
  -2 -12  -7   36.87    6.48
  -2 -12  -7   49.69    6.58
  -2 -12  -8  241.33   14.98
  -2 -12  -8  241.83   15.13
  -2 -12  -8  217.49   15.97
  -2 -12  -9    7.07    3.45
  -2 -12  -9    6.40    2.92
  -2 -12  -9    2.99    2.18
  -2 -12 -10  128.11    9.07
  -2 -12 -10  112.83    9.94
  -2 -12 -11  126.48    8.11
  -2 -13   6   33.29    3.63
  -2 -13   5  182.90   10.65
  -2 -13   4   10.32    2.59
  -2 -13   3  252.66   14.60
  -2 -13   2   56.91    6.81
  -2 -13   1  115.83   10.03
  -2 -13   0  260.06   16.00
  -2 -13  -1  116.85   10.45
  -2 -13  -2  260.94   16.31
  -2 -13  -3   23.93    4.73
  -2 -13  -4  375.27   19.87
  -2 -13  -5  178.65   12.78
  -2 -13  -6   54.62    6.39
  -2 -13  -7  226.57   13.66
  -2 -13  -8   21.14    3.61
  -2 -13  -8   24.81    4.08
  -2 -13  -9  243.89   12.75
  -2 -13  -9  230.85   12.33
  -2 -13 -10  102.09    6.75
  -2 -14   4   49.33    4.38
  -2 -14   3   99.75    7.01
  -2 -14   2  142.17    9.17
  -2 -14   1  201.49   11.77
  -2 -14   0    1.11    1.34
  -2 -14  -1  167.32   11.02
  -2 -14  -2   30.78    4.57
  -2 -14  -3  212.11   12.65
  -2 -14  -4  150.50   10.21
  -2 -14  -5   10.57    2.77
  -2 -14  -6  198.70   11.47
  -2 -14  -7    8.83    2.20
  -2 -14  -7    8.76    2.26
  -2 -14  -8  101.79    6.98
  -2 -14  -8  105.17    6.88
  -2 -15   1    1.62    0.84
  -2 -15   0  140.57    7.93
  -2 -15  -1   18.97    2.76
  -2 -15  -2   25.82    3.27
  -2 -15  -3  168.46    9.16
  -2 -15  -4   21.14    2.82
  -2 -15  -5  200.23    9.75
  -2 -15  -5  185.87    9.57
  -2 -15  -6    5.19    1.30
  -2 -15  -6    5.96    1.41
   3 -13  -8    5.93    1.94
   3 -13  -7  138.04    9.29
   3 -13  -6    2.36    1.86
   3 -13  -5  142.01   10.34
   3 -13  -5  137.01    8.13
   3 -13  -4  179.86   10.01
   3 -13  -4  188.61   12.35
   3 -13  -3   19.78    3.26
   3 -13  -2  196.72   10.86
   3 -13  -2  183.39   13.02
   3 -13  -1    0.91    1.79
   3 -13  -1    2.38    1.17
   3 -13   0  165.99    9.83
   3 -13   0  165.95   12.51
   3 -13   1  120.83    8.03
   3 -13   1  132.22   10.78
  -3  13  -2   60.66    5.64
   3 -13   2   51.41    4.87
  -3  13  -3   93.78    6.80
   3 -13   3   89.50    6.16
   3 -13   4    1.92    0.86
  -3  13  -4    1.31    1.22
   3 -12 -10  126.86    7.84
   3 -12  -9    8.89    2.41
   3 -12  -8  208.17   13.07
   3 -12  -7   41.75    5.97
   3 -12  -7   39.90    4.43
   3 -12  -6  157.64   10.10
   3 -12  -6  164.57   12.67
   3 -12  -5   85.69    7.48
   3 -12  -5  123.85   10.96
   3 -12  -4   10.41    2.76
   3 -12  -4   12.54    3.87
   3 -12  -4   14.27    4.23
   3 -12  -3  153.92   10.91
   3 -12  -3  150.23   13.77
   3 -12  -2   12.86    3.82
   3 -12  -2    9.69    3.38
   3 -12  -2    9.95    2.61
   3 -12  -1  119.08   10.58
   3 -12  -1   87.59    8.11
   3 -12  -1  100.21   11.71
   3 -12   0   94.80    8.44
   3 -12   0  127.96   12.85
  -3  12  -1   33.63    5.19
   3 -12   1   33.89    7.00
   3 -12   1   34.25    4.79
  -3  12  -2  242.72   15.07
   3 -12   2  249.98   18.23
   3 -12   2  234.25   13.70
  -3  12  -3    1.53    1.67
   3 -12   3    1.93    1.39
  -3  12  -4  222.95   13.67
   3 -12   4  235.43   12.69
  -3  12  -5   28.82    4.29
   3 -12   5   27.76    3.68
  -3  12  -6   70.92    6.28
   3 -12   6   68.79    5.29
  -3  12  -7  151.87    8.66
   3 -11 -11  119.99    7.86
   3 -11 -10    2.75    1.72
   3 -11 -10   -2.90    1.72
   3 -11  -9  198.30   13.25
   3 -11  -9  183.15   12.35
   3 -11  -8   59.04    7.41
   3 -11  -8   52.02    5.53
   3 -11  -8   58.72    6.98
   3 -11  -7   50.06    5.80
   3 -11  -7   64.89    8.30
   3 -11  -7   71.83    8.12
   3 -11  -6  215.96   16.08
   3 -11  -6  207.46   16.02
   3 -11  -5    0.29    1.29
   3 -11  -5    4.12    2.22
   3 -11  -4  223.28   16.91
   3 -11  -4  176.81   12.80
   3 -11  -4  180.83   16.57
   3 -11  -3   11.33    3.19
   3 -11  -3   16.72    4.83
   3 -11  -3    8.73    3.66
   3 -11  -2  208.36   16.22
   3 -11  -2  175.66   13.17
   3 -11  -2  195.66   18.19
   3 -11  -2  220.68   16.23
   3 -11  -1    9.22    2.84
   3 -11  -1   12.13    3.70
   3 -11  -1   11.02    3.77
   3 -11   0   63.21    8.46
   3 -11   0   48.01    6.54
   3 -11   0   54.32    9.48
   3 -11   0   59.21    7.87
   3 -11   1  214.79   18.99
   3 -11   1  223.71   15.78
   3 -11   2    8.15    2.75
   3 -11   2   15.60    5.77
   3 -11   2    9.28    3.49
  -3  11  -3  204.98   15.49
   3 -11   3  205.26   13.85
   3 -11   3  232.80   19.16
   3 -11   3  217.40   15.11
  -3  11  -4  158.00   13.18
   3 -11   4  180.63   16.13
   3 -11   4  175.02   12.17
  -3  11  -5  122.71   11.07
   3 -11   5  118.15    9.42
  -3  11  -6  133.45   10.87
   3 -11   6  130.31    9.35
  -3  11  -7    1.75    1.89
   3 -11   7    1.03    1.05
  -3  11  -8   99.67    7.65
   3 -11   8   88.69    6.15
  -3  11  -9   58.97    4.86
   3 -10 -12  132.73    8.20
   3 -10 -12  163.07    9.55
   3 -10 -11   14.88    3.25
   3 -10 -11   15.88    3.47
   3 -10 -10  180.13   12.76
   3 -10  -9  123.76   11.01
   3 -10  -8   71.74    7.31
   3 -10  -8   59.71    8.00
   3 -10  -7  512.89   25.84
   3 -10  -7  508.81   27.88
   3 -10  -6    2.65    1.65
   3 -10  -6    0.91    2.26
   3 -10  -6    4.50    2.80
   3 -10  -5  299.07   17.99
   3 -10  -5  279.84   21.92
   3 -10  -4  143.72   11.89
   3 -10  -4  155.66   16.21
   3 -10  -4  150.35   13.08
   3 -10  -3  359.19   20.63
   3 -10  -3  443.77   25.88
   3 -10  -3  319.74   24.98
   3 -10  -3  438.35   23.99
   3 -10  -2  563.56   29.65
   3 -10  -2  460.14   24.57
   3 -10  -2  501.74   31.82
   3 -10  -2  564.07   28.75
   3 -10  -1    4.90    2.53
   3 -10  -1   10.26    4.31
   3 -10  -1    2.39    2.43
   3 -10  -1    4.81    2.44
   3 -10   0  267.73   18.59
   3 -10   0  262.52   22.07
   3 -10   0  305.06   19.82
   3 -10   1    3.11    2.08
   3 -10   1   10.50    2.83
   3 -10   1    6.19    4.14
   3 -10   2  156.59   13.00
   3 -10   2  198.79   19.20
   3 -10   2  210.95   15.80
   3 -10   3  250.67   16.58
   3 -10   3  234.00   20.95
   3 -10   3  268.35   17.89
   3 -10   4   57.47   10.20
   3 -10   4   55.19    7.25
  -3  10  -5  198.16   15.76
   3 -10   5  188.45   17.78
   3 -10   5  211.45   14.23
  -3  10  -6   12.48    3.76
  -3  10  -7  274.12   17.41
  -3  10  -8   57.75    6.90
  -3  10  -9   13.24    3.05
  -3  10 -10  102.82    7.15
   3  -9 -13  146.24    9.10
   3  -9 -12    8.81    2.29
   3  -9 -12   13.53    3.04
   3  -9 -11  203.42   13.93
   3  -9 -10  306.54   18.83
   3  -9  -9  104.78   11.31
   3  -9  -9  117.67   11.66
   3  -9  -8  522.46   29.25
   3  -9  -8  580.04   28.77
   3  -9  -7    3.35    2.00
   3  -9  -7    8.21    3.63
   3  -9  -7    8.96    4.17
   3  -9  -6  374.99   20.97
   3  -9  -6  347.00   24.94
   3  -9  -5  100.54    9.88
   3  -9  -5  127.99   12.58
   3  -9  -5   95.77   10.04
   3  -9  -4  671.13   32.10
   3  -9  -4  722.87   37.61
   3  -9  -4  689.20   31.79
   3  -9  -3  920.24   44.23
   3  -9  -3  836.58   36.24
   3  -9  -3  887.37   37.42
   3  -9  -2   40.85    6.54
   3  -9  -2   48.18    7.64
   3  -9  -2   47.40    8.86
   3  -9  -1 1087.70   44.92
   3  -9  -1 1109.62   50.64
   3  -9  -1 1118.86   44.41
   3  -9   0  116.03   12.05
   3  -9   0   88.50    9.67
   3  -9   0  117.89   14.48
   3  -9   0  116.97   12.14
   3  -9   1   47.26    7.02
   3  -9   1   76.14    9.13
   3  -9   1   75.08    9.41
   3  -9   1   60.44   10.51
   3  -9   2  152.78   17.06
   3  -9   2  169.45   14.62
   3  -9   3   66.38   11.08
   3  -9   3   67.23    8.98
   3  -9   4  579.26   35.01
   3  -9   4  576.04   28.83
   3  -9   5   23.02    7.66
   3  -9   5   19.49    4.39
  -3   9  -6  233.09   17.89
  -3   9  -7  158.55   14.11
  -3   9  -8   30.49    5.85
  -3   9  -9  138.90   11.34
  -3   9 -10    1.68    1.54
  -3   9 -11  104.63    7.37
   3  -8 -14  151.11    8.99
   3  -8 -13   43.95    5.49
   3  -8 -12  270.45   16.34
   3  -8 -11  189.13   14.46
   3  -8 -10  174.91   14.63
   3  -8 -10  177.30   14.96
   3  -8  -9  279.58   19.16
   3  -8  -9  220.07   18.15
   3  -8  -8    2.21    1.83
   3  -8  -8    0.32    1.90
   3  -8  -8    4.46    3.15
   3  -8  -7  325.42   19.49
   3  -8  -7  305.63   23.05
   3  -8  -6   23.89    4.89
   3  -8  -6   29.44    6.42
   3  -8  -6   30.04    7.22
   3  -8  -5  177.34   13.46
   3  -8  -5  185.40   15.48
   3  -8  -5  189.52   17.59
   3  -8  -5  169.01   13.52
   3  -8  -4 1110.71   42.53
   3  -8  -4 1056.51   49.56
   3  -8  -4 1064.46   44.61
   3  -8  -4 1060.65   43.50
   3  -8  -3   19.57    4.49
   3  -8  -3   17.53    4.66
   3  -8  -3   10.18    4.57
   3  -8  -3   19.18    4.61
   3  -8  -2  721.31   31.75
   3  -8  -2  716.88   38.76
   3  -8  -2  711.96   33.56
   3  -8  -1  165.92   13.00
   3  -8  -1  154.42   16.50
   3  -8  -1  164.05   14.01
   3  -8   0   48.56    7.01
   3  -8   0   39.64    6.62
   3  -8   0   49.69    9.55
   3  -8   0   51.75    7.91
   3  -8   1  594.38   29.76
   3  -8   1  578.64   34.93
   3  -8   1  634.92   31.22
   3  -8   2   79.46   12.18
   3  -8   2   76.68   10.03
   3  -8   3  233.15   21.03
   3  -8   3  243.35   17.77
   3  -8   4  174.19   18.10
   3  -8   4  171.51   14.40
   3  -8   5  451.61   29.95
   3  -8   5  407.59   22.95
   3  -8   6  391.55   27.77
  -3   8  -7   51.85    8.19
  -3   8  -8  286.36   19.70
  -3   8  -8  290.88   17.59
  -3   8  -9    2.59    2.78
   3  -8   9    3.35    1.93
  -3   8 -10  195.06   13.86
   3  -8  10  216.32   12.94
  -3   8 -11  104.68    8.52
   3  -8  11  100.62    7.44
   3  -7 -15  178.19    8.90
   3  -7 -14   27.59    4.03
   3  -7 -13  182.24   12.56
   3  -7 -12  228.75   15.34
   3  -7 -12  225.84   15.79
   3  -7 -11    2.22    2.40
   3  -7 -10  402.91   24.94
   3  -7  -9    0.04    2.36
   3  -7  -8   77.50    8.86
   3  -7  -8  109.36   12.96
   3  -7  -8   95.39   11.81
   3  -7  -7  253.53   20.12
   3  -7  -7  226.35   18.90
   3  -7  -6   14.75    8.87
   3  -7  -6   31.61    5.43
   3  -7  -6   23.98    5.10
   3  -7  -6   26.93    6.53
   3  -7  -6   31.25    7.12
   3  -7  -5 1169.70   43.95
   3  -7  -5 1174.98   51.59
   3  -7  -5 1148.33   47.12
   3  -7  -4   14.67   10.70
   3  -7  -4   11.41    4.21
   3  -7  -3    9.85    9.47
   3  -7  -2 1013.56   76.02
   3  -7  -1 1410.83   89.78
   3  -7   0  389.86   43.45
   3  -7   1   41.70   13.54
   3  -7   2  964.60   70.25
   3  -7   2  787.50   41.60
   3  -7   3  295.52   37.83
   3  -7   3  240.62   21.01
   3  -7   4  527.60   32.88
   3  -7   5  131.59   15.10
   3  -7   5  102.90   10.50
  -3   7  -6  153.58   13.22
   3  -7   6  153.70   16.87
  -3   7  -7  547.20   30.41
  -3   7  -7  565.85   28.56
  -3   7  -8   44.01    6.81
  -3   7  -8   41.10    7.69
   3  -7   8   31.42    6.13
  -3   7  -9  116.51   12.15
   3  -7   9   92.94   10.39
  -3   7  -9  123.37   11.28
  -3   7 -10  251.84   16.79
   3  -7  10  176.09   13.72
  -3   7 -11   37.79    5.50
   3  -7  11   34.69    5.10
  -3   7 -12  106.45    8.31
   3  -7  12  110.04    8.18
   3  -6 -15   21.38    3.04
   3  -6 -14   65.10    6.77
   3  -6 -13  307.51   17.42
   3  -6 -12   16.95    5.42
   3  -6 -12    3.20    2.43
   3  -6 -11  167.86   15.10
   3  -6 -11  183.43   14.58
   3  -6 -10  306.97   21.51
   3  -6 -10  267.02   18.86
   3  -6  -9  181.02   36.33
   3  -6  -9  169.10   16.09
   3  -6  -9  151.42   14.64
   3  -6  -9  160.54   14.24
   3  -6  -8  247.27   16.96
   3  -6  -8  330.88   47.97
   3  -6  -8  340.68   23.18
   3  -6  -8  310.41   21.92
   3  -6  -8  302.95   20.18
   3  -6  -7  122.25   10.89
   3  -6  -7   77.26   23.00
   3  -6  -7  123.76   13.45
   3  -6  -7   87.51   11.07
   3  -6  -7  112.52   11.71
   3  -6  -6  140.50   31.10
   3  -6  -6  189.08   16.74
   3  -6  -6  195.83   17.48
   3  -6  -5  233.89   36.31
   3  -6  -4  678.58   62.77
   3  -6  -3  318.61   40.57
   3  -6  -2  264.83   27.19
   3  -6  -2  193.16   30.76
   3  -6  -1  381.20   31.17
   3  -6  -1  228.95   32.91
   3  -6   0  249.64   33.33
   3  -6   1 1603.08   92.15
   3  -6   2    2.71    5.41
   3  -6   3    4.71    4.66
   3  -6   4  495.49   30.01
   3  -6   4  365.36   36.20
  -3   6  -5   60.73    8.01
   3  -6   5   61.42   10.42
   3  -6   5   57.58   14.80
  -3   6  -6  262.93   18.29
   3  -6   6  271.87   22.42
  -3   6  -7   79.42    9.79
   3  -6   7   63.86    9.16
  -3   6  -8   24.38    6.02
  -3   6  -8   25.17    5.31
   3  -6   8   22.16    5.49
  -3   6  -9  246.77   17.74
  -3   6  -9  278.14   19.49
   3  -6   9  212.44   17.28
  -3   6 -10   18.68    4.91
  -3   6 -10   17.61    4.86
   3  -6  10   20.54    5.02
  -3   6 -11  214.90   15.08
   3  -6  11  192.05   14.61
  -3   6 -12   18.51    3.73
   3  -6  12   13.78    3.44
   3  -6  13  119.32    8.69
   3  -5 -15   26.42    3.60
   3  -5 -14   84.16    7.64
   3  -5 -14   76.91    7.27
   3  -5 -13    8.02    3.58
   3  -5 -13    3.51    2.69
   3  -5 -12  136.87   13.01
   3  -5 -12  162.32   13.25
   3  -5 -11  312.76   22.16
   3  -5 -11  404.28   22.86
   3  -5 -10  547.12   30.56
   3  -5 -10  482.84   27.61
   3  -5 -10  507.70   27.56
   3  -5  -9  162.01   34.24
   3  -5  -9  180.00   16.48
   3  -5  -9  156.05   14.82
   3  -5  -9  151.51   13.80
   3  -5  -8    0.72    2.65
   3  -5  -8   12.67    4.31
   3  -5  -8    9.94    4.04
   3  -5  -7  564.14   62.33
   3  -5  -7  529.33   30.06
   3  -5  -7  589.06   32.12
   3  -5  -7  626.85   30.45
   3  -5  -6  116.72   27.26
   3  -5  -5  417.52   49.72
   3  -5  -4  258.64   37.47
   3  -5  -3   22.74   12.67
   3  -5  -2 1417.09   87.21
   3  -5  -1   28.93   13.07
   3  -5  -1   17.81    6.10
   3  -5   0  117.08   21.72
   3  -5   0  121.73   15.11
   3  -5   1  320.40   36.01
   3  -5   2   11.82    5.48
   3  -5   3 1414.78   73.68
   3  -5   4  112.71   18.85
   3  -5   5   57.16   14.32
  -3   5  -6  581.30   29.47
   3  -5   6  621.16   34.37
  -3   5  -7  481.40   26.47
   3  -5   7  514.67   31.16
   3  -5   7  483.33   28.20
  -3   5  -8  267.45   19.74
  -3   5  -8  257.08   18.68
   3  -5   8  270.65   20.59
   3  -5   8  295.65   35.86
  -3   5  -9   24.61    5.64
  -3   5  -9   21.31    5.41
   3  -5   9   17.19    5.15
  -3   5 -10  198.55   16.20
  -3   5 -10  238.39   17.56
   3  -5  10  257.08   19.37
  -3   5 -11   78.07    9.15
   3  -5  11   72.05    9.78
  -3   5 -11   77.44    9.22
  -3   5 -12  144.82   11.46
   3  -5  12  144.11   12.53
   3  -5  13   78.10    7.97
   3  -5  14    4.36    1.80
   3  -4 -15  111.61    7.74
   3  -4 -14   24.64    4.22
   3  -4 -14   37.75    5.55
   3  -4 -13  317.70   19.71
   3  -4 -13  316.59   18.52
   3  -4 -12   40.96    6.74
   3  -4 -12   51.75    8.06
   3  -4 -11    2.32    1.94
   3  -4 -11    6.63    3.69
   3  -4 -10  613.25   70.50
   3  -4 -10  723.89   36.57
   3  -4 -10  657.13   32.54
   3  -4  -9   -0.61   12.34
   3  -4  -9    7.08    2.98
   3  -4  -9    5.83    3.59
   3  -4  -9    3.32    3.69
   3  -4  -8  459.72   56.98
   3  -4  -8  433.30   26.35
   3  -4  -8  388.99   24.01
   3  -4  -8  383.88   22.94
   3  -4  -7  285.97   43.78
   3  -4  -6   38.58   15.09
   3  -4  -5 1059.27   80.13
   3  -4  -4  486.24   50.33
   3  -4  -3  562.51   52.01
   3  -4  -2  172.29   26.42
   3  -4  -1  173.71   26.24
   3  -4   0 1128.35   50.73
   3  -4   0 1446.62   77.66
   3  -4   1    6.25    3.53
   3  -4   1   21.06    5.31
   3  -4   2 3566.82  133.20
   3  -4   3  449.94   36.58
   3  -4   4  269.45   28.62
   3  -4   5  272.70   30.10
   3  -4   6  179.39   25.39
  -3   4  -7  349.21   21.81
   3  -4   7  354.37   24.30
   3  -4   7  331.51   23.13
   3  -4   7  360.81   38.22
  -3   4  -8  210.97   16.66
  -3   4  -8  202.61   16.26
   3  -4   8  187.41   17.31
   3  -4   8  204.60   29.49
  -3   4  -9  546.60   29.17
  -3   4  -9  523.85   28.73
   3  -4   9  508.46   30.74
  -3   4 -10   22.59    5.39
  -3   4 -10    9.91    2.98
   3  -4  10   16.53    5.46
  -3   4 -11   86.82    9.98
  -3   4 -11  128.27   12.39
   3  -4  11  108.31   12.82
  -3   4 -12  325.54   18.92
   3  -4  12  324.61   21.45
   3  -4  13    3.92    2.45
   3  -4  14   88.30    8.14
   3  -4  15   14.30    2.64
   3  -3 -16  163.63    8.45
   3  -3 -15    5.05    1.82
   3  -3 -15    2.52    1.61
   3  -3 -14  124.72   10.58
   3  -3 -14  110.51    9.36
   3  -3 -13  161.83   13.87
   3  -3 -13  156.83   12.58
   3  -3 -12   -0.09    2.18
   3  -3 -12    1.45    2.23
   3  -3 -11  423.43   24.36
   3  -3 -11  360.65   22.46
   3  -3 -10    1.21    1.80
   3  -3 -10   -0.43    1.68
   3  -3  -9  289.57   46.16
   3  -3  -9  334.76   21.83
   3  -3  -9  298.99   19.94
   3  -3  -8  771.71   74.51
   3  -3  -7  439.75   53.75
   3  -3  -6  448.13   51.87
   3  -3  -5    0.37    6.70
   3  -3  -4 3040.36  143.87
   3  -3  -3 1268.35   79.92
   3  -3  -2  558.73   48.51
   3  -3  -1 1335.83   75.98
   3  -3   0   57.51   13.03
   3  -3   1 1876.14   60.71
   3  -3   1 1938.43   82.17
   3  -3   2  253.25   24.89
   3  -3   3 2091.48   90.27
   3  -3   4 1069.78   60.42
   3  -3   5  234.34   27.28
   3  -3   6  739.54   52.98
   3  -3   7   15.79    8.16
   3  -3   8  519.37   47.09
  -3   3  -8  488.40   26.66
  -3   3  -8  465.19   25.79
  -3   3  -8  447.91   25.61
   3  -3   9  182.26   28.26
  -3   3  -9  189.62   15.73
  -3   3  -9  162.62   14.40
  -3   3  -9  170.15   14.78
  -3   3 -10   75.90    9.36
  -3   3 -10   81.35   10.11
   3  -3  10   79.25   11.41
   3  -3  10   95.20   20.57
  -3   3 -11  318.50   20.26
  -3   3 -11  379.99   23.13
   3  -3  11  340.31   24.24
  -3   3 -12   11.42    5.07
   3  -3  12    1.80    2.44
   3  -3  13  126.63   12.46
   3  -3  14  120.21   10.57
   3  -3  15   49.61    5.45
  -3   3 -15   55.77    5.09
   3  -2 -15  100.81    8.16
   3  -2 -15   90.87    7.27
   3  -2 -14  156.82   12.38
   3  -2 -14  149.05   11.13
   3  -2 -13   50.75    6.91
   3  -2 -12  259.80   18.07
   3  -2 -12  236.87   16.94
   3  -2 -11   95.68   10.40
   3  -2 -11   69.18    9.31
   3  -2 -10  635.20   69.82
   3  -2 -10  592.44   29.16
   3  -2  -9  620.70   68.09
   3  -2  -9  577.15   29.07
   3  -2  -9  546.58   29.92
   3  -2  -8   63.46   17.95
   3  -2  -7  709.43   68.65
   3  -2  -6  207.61   34.87
   3  -2  -5  828.66   67.52
   3  -2  -4 1132.94   77.26
   3  -2  -3  103.35   20.83
   3  -2  -2 1943.68   96.93
   3  -2  -1  274.40   30.02
   3  -2   0  410.59   30.84
   3  -2   0  431.42   36.99
   3  -2   1  410.21   30.80
   3  -2   2 2966.42  111.01
   3  -2   3 2290.99   94.01
   3  -2   4   11.74    4.64
   3  -2   5 3287.23  129.40
   3  -2   6   88.91   17.47
   3  -2   7  847.23   58.94
   3  -2   8  539.40   48.42
  -3   2  -8  547.63   28.76
  -3   2  -8  611.30   29.93
   3  -2   9  241.35   32.39
  -3   2  -9  243.10   17.98
  -3   2  -9  252.82   18.40
   3  -2  10  220.76   32.26
  -3   2 -10  222.74   17.11
  -3   2 -10  205.24   17.06
  -3   2 -11   84.86   10.37
   3  -2  11   66.71   10.59
  -3   2 -11   92.35   10.92
   3  -2  12  157.14   15.82
  -3   2 -12  187.71   15.23
   3  -2  13  124.12   13.23
   3  -2  14   46.65    7.09
   3  -2  15   56.82    6.44
  -3   2 -15   62.54    6.00
   3  -2  16    0.34    0.84
   3  -1 -15  177.82   11.47
   3  -1 -15  182.01   10.70
   3  -1 -14    0.53    1.44
   3  -1 -13  596.65   28.32
   3  -1 -13  628.80   29.30
   3  -1 -12   28.96    5.79
   3  -1 -12   31.06    5.88
   3  -1 -11  225.77   18.00
   3  -1 -10  145.87   32.71
   3  -1 -10  139.92   13.96
   3  -1  -9    8.15   10.86
   3  -1  -9   19.78    5.01
   3  -1  -8 1320.59   99.04
   3  -1  -7  795.20   71.85
   3  -1  -6  901.16   73.91
   3  -1  -5  745.17   63.40
   3  -1  -4  461.90   46.07
   3  -1  -3 1201.18   44.46
   3  -1  -3 1215.43   74.70
   3  -1  -2   32.87   10.81
   3  -1  -2   40.30    4.77
   3  -1  -1  392.38   19.18
   3  -1  -1  376.88   34.01
   3  -1   0 3111.49  117.88
   3  -1   0 2831.55  105.98
   3  -1   1 1345.59   60.78
   3  -1   2 1534.10   67.56
   3  -1   3  368.51   29.35
   3  -1   4 2268.61   94.02
   3  -1   5  462.07   37.09
   3  -1   6  152.01   22.04
   3  -1   7  882.36   59.41
   3  -1   8    0.62    6.04
   3  -1   9  972.47   68.84
  -3   1  -9 1031.00   43.14
  -3   1  -9 1019.52   43.52
   3  -1  10   19.92    5.88
  -3   1 -10   15.01    5.11
  -3   1 -10   10.24    4.85
   3  -1  11  168.25   28.70
  -3   1 -11  182.81   15.29
  -3   1 -11  181.40   15.75
  -3   1 -12  220.97   16.69
  -3   1 -12  204.87   16.33
   3  -1  13    7.98    5.25
   3  -1  14  287.37   19.26
   3  -1  15    0.62    1.49
  -3   1 -15    1.74    1.20
   3  -1  16   30.20    3.95
  -3   1 -16   30.10    3.46
   3   0 -15    2.92    1.37
   3   0 -15    5.04    2.17
   3   0 -14  178.79   12.20
   3   0 -14  188.88   12.65
   3   0 -13  142.78   11.73
   3   0 -13  101.81   10.48
   3   0 -12  173.66   15.04
   3   0 -11  324.28   22.02
   3   0 -10   45.01   17.45
  -3   0  10   61.16   16.94
   3   0 -10   53.71    8.42
   3   0  -9  600.99   66.62
   3   0  -9  631.82   32.58
   3   0  -8   14.51   10.63
   3   0  -7 1413.11   98.23
   3   0  -6 1414.80   93.92
   3   0  -5   -4.34    5.57
   3   0  -5   10.14    3.13
   3   0  -4 2702.01  100.92
   3   0  -4 2474.84  121.90
   3   0  -3   14.70    8.84
   3   0  -3   22.64    6.01
   3   0  -2 1656.66   62.14
   3   0  -2 1479.93   79.19
   3   0  -1 1360.50   52.50
   3   0  -1 1230.68   65.93
   3   0   0  801.50   46.85
   3   0   0  747.24   40.47
   3   0   1 1094.91   50.97
   3   0   2  114.38   14.59
   3   0   3 1336.09   61.54
   3   0   4  299.72   27.38
   3   0   5  128.09   18.70
   3   0   6 1721.77   83.58
   3   0   7    4.33    7.41
   3   0   8 1311.06   77.62
   3   0   9  154.18   25.57
  -3   0  -9  158.64   13.63
  -3   0  -9  173.72   14.52
   3   0  10  381.09   41.74
  -3   0 -10  381.74   22.94
  -3   0 -10  368.23   23.31
   3   0  11  334.34   39.91
  -3   0 -11  355.70   21.97
  -3   0 -11  333.22   22.23
  -3   0 -12    2.71    1.86
  -3   0 -12   -4.46    2.64
   3   0  13  381.13   25.66
  -3   0 -13  446.84   24.34
   3   0  14  103.12   11.42
   3   0  15  110.94   10.17
  -3   0 -15  131.71    9.76
   3   0  16   89.47    7.29
  -3   0 -16   93.25    6.65
   3   1 -15   25.73    3.50
   3   1 -14   76.08    7.43
   3   1 -14   86.63    8.20
   3   1 -13    4.83    1.71
   3   1 -12  491.90   27.39
  -3  -1  11   61.97    8.47
   3   1 -11   60.35    9.03
  -3  -1  10   68.75   17.26
  -3  -1  10   88.07   10.10
   3   1 -10   86.76   11.00
   3   1  -9   24.94   11.60
  -3  -1   9   19.45    5.03
   3   1  -8  258.11   41.30
   3   1  -7  465.89   52.67
   3   1  -6   31.16   10.06
   3   1  -6   30.84   13.98
   3   1  -5 1742.81   84.90
   3   1  -5 1573.02   94.90
   3   1  -4 1275.66   65.52
   3   1  -4 1201.75   75.52
   3   1  -3 1873.12   94.42
   3   1  -3 2052.04   83.92
   3   1  -2  611.41   36.41
   3   1  -2  536.85   41.97
   3   1  -1    9.94    6.79
   3   1  -1    2.96    3.78
   3   1   0 2156.98   86.47
   3   1   1  275.98   21.14
   3   1   2  939.57   45.29
   3   1   3 2425.51   89.99
  -3  -1  -3 2341.93   78.75
   3   1   4   63.87   11.93
   3   1   5  514.09   37.51
   3   1   6  102.23   17.36
   3   1   7  380.56   35.67
   3   1   8  850.39   59.07
   3   1   9 1273.38   78.28
   3   1  10  498.85   48.04
  -3  -1 -10  492.44   26.25
  -3  -1 -10  485.26   27.27
   3   1  11   -7.78    9.45
  -3  -1 -11    3.16    2.82
  -3  -1 -11   -1.10    3.60
  -3  -1 -12  385.17   22.46
  -3  -1 -12  386.59   23.40
  -3  -1 -13   64.17    8.45
   3   1  14  130.63   13.14
  -3  -1 -14  144.17   11.86
   3   1  15  117.01   10.81
  -3  -1 -15  142.99   10.44
   3   1  16    3.29    1.60
  -3  -1 -16    4.52    1.62
   3   2 -15  103.65    7.11
   3   2 -15  110.15    7.23
   3   2 -14    0.61    1.05
   3   2 -14    1.79    1.20
  -3  -2  13  282.42   16.25
   3   2 -13  287.55   18.36
  -3  -2  12   30.73    5.47
   3   2 -12   22.47    5.30
  -3  -2  11  152.73   13.49
   3   2 -11  168.11   15.29
  -3  -2  10   86.35   10.44
  -3  -2  10  122.72   23.32
  -3  -2   9   30.31    6.35
  -3  -2   9   35.48   12.98
   3   2  -8  605.62   63.26
   3   2  -7   -2.02    7.63
   3   2  -7   11.36    7.35
   3   2  -6 1468.60   86.53
   3   2  -6 1516.06   94.63
   3   2  -5 1113.48   69.04
   3   2  -5 1013.62   71.28
   3   2  -4  603.67   45.70
   3   2  -4  565.93   47.93
   3   2  -3  512.36   39.13
   3   2  -3  526.22   42.74
   3   2  -2   21.77    8.69
   3   2  -2   15.03    6.68
   3   2  -1 1471.07   66.51
   3   2  -1 1319.54   64.39
   3   2   0  369.97   29.30
   3   2   0  392.66   28.99
   3   2   1  398.22   26.93
   3   2   1  353.16   23.19
   3   2   2 2260.25   81.51
   3   2   3  891.71   43.49
  -3  -2  -3  792.68   40.67
   3   2   4  641.13   38.36
  -3  -2  -4  610.13   35.58
   3   2   5   19.58    7.34
   3   2   6  662.77   45.26
   3   2   7  112.53   18.32
   3   2   8  243.56   29.60
   3   2   9  971.22   66.17
   3   2  10    5.48    7.09
  -3  -2 -10   -2.94    1.54
   3   2  11  417.61   44.38
  -3  -2 -11  467.79   25.72
  -3  -2 -12    5.44    2.80
  -3  -2 -13   95.21   10.41
  -3  -2 -13   87.25    9.70
  -3  -2 -14  146.41   12.10
  -3  -2 -14  143.99   11.71
   3   2  15    4.71    2.18
  -3  -2 -15   10.25    2.80
   3   2  16  103.35    8.05
  -3  -2 -16  111.98    7.82
   3   3 -15    6.14    1.70
  -3  -3  14  225.33   11.81
   3   3 -14  217.40   12.35
   3   3 -14  216.62   13.22
  -3  -3  13   67.26    7.19
   3   3 -13   62.95    7.93
  -3  -3  12  274.00   17.80
   3   3 -12  303.16   19.99
  -3  -3  11  217.05   16.55
  -3  -3  10  168.95   14.88
  -3  -3   9  846.45   63.87
  -3  -3   9 1048.52   44.26
  -3  -3   8   -2.24    5.92
  -3  -3   8    7.43    3.54
  -3  -3   7  390.07   37.38
   3   3  -7  370.98   45.01
   3   3  -6  129.76   25.66
   3   3  -6  144.27   25.76
   3   3  -5  137.60   24.57
   3   3  -5  109.53   21.13
   3   3  -4  270.51   31.92
   3   3  -4  307.77   33.49
   3   3  -3   24.46    8.89
   3   3  -3   22.33    8.97
   3   3  -2 1216.05   67.30
   3   3  -2 1240.64   62.42
   3   3  -1 1158.91   62.91
   3   3  -1 1138.94   54.32
   3   3   0 3339.71  125.52
   3   3   0 3230.11  109.69
   3   3   1 1297.76   65.73
   3   3   1 1216.90   50.53
   3   3   1 1221.24   48.28
   3   3   2  697.32   33.84
   3   3   3  507.36   29.92
  -3  -3  -4  571.55   37.22
   3   3   4  584.16   35.01
   3   3   5 1164.59   57.37
  -3  -3  -5 1087.91   57.36
   3   3   6  639.78   43.13
   3   3   7   27.42    8.28
   3   3   8  947.42   61.16
   3   3   9   35.06   11.75
  -3  -3 -10  298.37   18.39
  -3  -3 -10  299.05   20.04
   3   3  11  105.93   21.60
  -3  -3 -11  125.84   11.27
  -3  -3 -11  128.87   12.71
  -3  -3 -12  136.29   13.10
  -3  -3 -12  128.11   12.38
  -3  -3 -13  391.84   22.18
  -3  -3 -13  391.79   22.82
  -3  -3 -14    1.18    1.49
  -3  -3 -14    2.60    1.72
   3   3  15  222.93   15.16
  -3  -3 -15  268.76   15.17
   3   3  16   17.25    3.11
  -3  -3 -16   17.32    2.96
  -3  -4  14   39.52    4.27
   3   4 -14   31.10    4.42
  -3  -4  13  125.79    9.75
   3   4 -13  127.86   10.87
  -3  -4  12  245.26   16.23
   3   4 -12  226.99   16.80
  -3  -4  11   62.83    8.50
  -3  -4  10  256.79   18.86
  -3  -4   9   26.47    5.63
   3   4  -8  576.64   61.24
  -3  -4   8  528.21   29.17
   3   4  -7   94.15   24.16
  -3  -4   7  100.84   17.83
  -3  -4   7   93.98   10.84
   3   4  -6  269.07   38.95
  -3  -4   6  334.56   31.61
   3   4  -5  988.28   73.55
  -3  -4   5 1000.84   55.30
   3   4  -4    5.22    4.66
   3   4  -4   10.15    8.61
   3   4  -3 1544.15   73.56
   3   4  -3 1311.47   80.33
   3   4  -2  942.02   48.89
   3   4  -2  900.84   60.49
   3   4  -1  157.30   22.56
   3   4  -1  168.58   15.17
   3   4   0 1986.48   93.13
   3   4   1   21.30    9.53
   3   4   2 1405.60   48.64
   3   4   2 1389.35   51.09
   3   4   3  473.50   27.02
   3   4   4 1975.76   75.36
  -3  -4  -4 1916.39   85.82
   3   4   5  337.03   26.83
  -3  -4  -5  291.27   28.87
   3   4   6   22.87    7.72
  -3  -4  -6   28.41    8.85
   3   4   7 1324.56   69.58
   3   4   8   17.36    8.73
  -3  -4  -9   87.89    9.44
   3   4   9   79.60   16.73
  -3  -4  -9   84.38    9.72
  -3  -4  -9   78.18    9.39
  -3  -4  -9   89.07   10.38
   3   4  10  645.93   52.97
  -3  -4 -10  635.90   30.38
  -3  -4 -10  640.47   32.13
   3   4  11  146.56   25.10
  -3  -4 -11  161.24   13.32
  -3  -4 -11  168.01   14.78
  -3  -4 -12  380.95   22.78
  -3  -4 -12  365.57   23.18
  -3  -4 -13    4.38    3.27
  -3  -4 -13    6.81    2.82
  -3  -4 -14  316.16   18.33
  -3  -4 -14  254.80   15.66
   3   4  15   24.25    4.68
  -3  -4 -15   30.46    4.70
   3   4  16   55.05    5.13
  -3  -4 -16   59.89    5.40
  -3  -5  14  139.03    7.94
   3   5 -14  129.53    7.61
   3   5 -14  148.03    9.16
  -3  -5  13   79.84    7.26
   3   5 -13   76.52    7.77
  -3  -5  12    9.78    3.13
  -3  -5  11  293.16   19.13
  -3  -5  10   12.82    3.83
  -3  -5   9  218.41   17.48
  -3  -5   8  333.22   22.79
   3   5  -8  330.09   47.51
   3   5  -7    5.68    3.48
  -3  -5   7    1.09    2.22
   3   5  -6 1627.39   61.23
  -3  -5   6 1637.85   61.44
   3   5  -6 1557.15  104.47
   3   5  -5   39.05   13.39
   3   5  -4 1136.82   80.21
   3   5  -3  689.48   58.46
   3   5  -2  282.86   34.26
   3   5  -1  760.13   56.91
   3   5   0   29.25   12.60
   3   5   1 1767.77   91.15
   3   5   2  844.16   58.39
   3   5   3  900.79   61.36
  -3  -5  -4 1453.41   75.52
   3   5   5   14.61    5.68
  -3  -5  -5    9.42    6.07
  -3  -5  -6 1882.38   93.67
   3   5   6 1994.59   83.34
   3   5   7   96.27   16.08
  -3  -5  -7  112.71   20.08
  -3  -5  -8   95.51   10.06
   3   5   8  114.60   18.38
  -3  -5  -8   89.73    9.84
  -3  -5  -9  760.64   34.33
   3   5   9  805.54   55.74
  -3  -5  -9  733.64   34.39
  -3  -5  -9  741.59   35.22
  -3  -5  -9  746.96   34.37
  -3  -5 -10   57.97    8.08
   3   5  10   68.28   16.23
  -3  -5 -10   53.51    7.84
  -3  -5 -10   58.26    8.55
  -3  -5 -11  458.11   24.88
  -3  -5 -11  484.67   26.83
  -3  -5 -12   25.16    5.08
  -3  -5 -12   17.06    4.85
  -3  -5 -13  243.35   16.71
  -3  -5 -13  207.13   14.53
  -3  -5 -14   95.02    8.45
  -3  -5 -14   88.84    9.07
   3   5  15   26.71    4.25
  -3  -5 -15   32.55    4.66
  -3  -5 -15   31.26    4.53
  -3  -5 -16  141.48    8.42
  -3  -6  13    1.06    1.29
   3   6 -13    1.15    1.08
  -3  -6  12  263.91   15.51
   3   6 -12  255.27   16.22
  -3  -6  11   55.78    7.59
  -3  -6  10   37.41    7.01
  -3  -6   9  639.47   32.73
  -3  -6   8  152.28   14.51
   3   6  -8  141.65   32.18
   3   6  -7  384.68   24.32
  -3  -6   7  411.81   25.31
   3   6  -7  437.82   56.03
   3   6  -6    2.88    2.10
  -3  -6   6    2.31    2.13
   3   6  -6   10.18    9.17
   3   6  -5  390.50   23.55
  -3  -6   5  416.28   24.37
   3   6  -4  167.61   30.37
   3   6  -3  407.28   47.07
   3   6  -2 1062.26   75.69
   3   6  -1  252.42   33.71
   3   6   0 1735.60   96.00
   3   6   1  212.28   30.07
   3   6   2  209.99   28.95
   3   6   3  992.66   67.47
   3   6   4  319.75   37.13
  -3  -6  -4  315.05   33.76
  -3  -6  -5  224.33   28.57
  -3  -6  -6  677.67   52.57
  -3  -6  -7  932.84   64.68
  -3  -6  -8  621.03   30.17
  -3  -6  -8  590.79   28.40
  -3  -6  -8  607.23   29.88
  -3  -6  -8  581.29   29.72
  -3  -6  -8  613.44   29.65
  -3  -6  -8  632.14   31.17
  -3  -6  -9   56.15    8.03
  -3  -6  -9   57.65    7.79
  -3  -6  -9   62.71    8.53
  -3  -6  -9   65.75    8.89
  -3  -6  -9   65.19    8.99
  -3  -6  -9   60.58    8.24
  -3  -6 -10  443.91   24.42
  -3  -6 -10  466.44   25.19
  -3  -6 -10  441.57   25.49
  -3  -6 -11  100.23   10.69
  -3  -6 -11  107.51   11.35
  -3  -6 -11   78.03    9.77
  -3  -6 -12  214.84   15.20
  -3  -6 -12  160.32   14.16
  -3  -6 -13  429.90   21.22
  -3  -6 -13  420.62   23.20
  -3  -6 -14   10.55    3.08
  -3  -6 -14    9.91    3.03
  -3  -6 -15  307.07   15.76
  -3  -6 -15  297.75   15.28
  -3  -7  13   58.54    4.90
   3   7 -13   56.35    5.35
  -3  -7  12  108.68    8.52
   3   7 -12  117.36    9.51
  -3  -7  11   58.59    7.22
  -3  -7  10  127.22   11.91
  -3  -7   9    3.94    2.47
  -3  -7   8  257.37   19.10
   3   7  -7  353.22   23.22
  -3  -7   7  392.58   24.31
   3   7  -7  333.31   49.48
   3   7  -6  489.59   27.75
  -3  -7   6  515.21   28.71
   3   7  -6  479.36   58.76
   3   7  -5  262.86   19.03
  -3  -7   5  267.79   19.36
   3   7  -5  251.46   41.23
   3   7  -4    1.37    3.50
  -3  -7   4   -2.70    2.96
   3   7  -4    5.05   10.58
   3   7  -3  378.48   47.41
   3   7  -2   18.23   11.27
   3   7  -1  359.70   43.45
   3   7   0  297.67   39.06
   3   7   1    9.75    7.38
   3   7   2 1548.32   92.27
   3   7   3    7.97    6.26
  -3  -7  -4  220.89   29.70
   3   7   4  234.45   32.90
   3   7   5  522.92   50.59
  -3  -7  -5  563.04   49.18
   3   7   6  857.84   66.11
  -3  -7  -6  868.59   63.28
  -3  -7  -6  810.92   35.97
  -3  -7  -7  612.98   28.86
  -3  -7  -7  613.48   30.15
   3   7   7  594.99   55.40
  -3  -7  -7  616.29   53.10
  -3  -7  -7  581.24   30.31
  -3  -7  -7  638.12   29.88
  -3  -7  -7  594.43   30.48
  -3  -7  -8    9.57    4.00
  -3  -7  -8   15.19    4.41
   3   7   8   26.53   10.89
  -3  -7  -8   12.45    4.31
  -3  -7  -8   17.93    4.96
  -3  -7  -8   23.39    5.12
  -3  -7  -8   12.44    3.78
  -3  -7  -9  224.04   15.73
  -3  -7  -9  225.02   16.67
  -3  -7  -9  165.83   14.90
  -3  -7  -9  232.48   16.84
  -3  -7  -9  168.47   14.14
  -3  -7  -9  207.79   16.72
  -3  -7 -10  466.84   25.14
  -3  -7 -10  453.51   24.86
  -3  -7 -10  343.13   22.48
  -3  -7 -10  354.76   21.66
  -3  -7 -10  460.32   25.72
  -3  -7 -11   51.06    7.55
  -3  -7 -11   45.81    7.14
  -3  -7 -11   38.64    6.36
  -3  -7 -11   37.10    6.41
  -3  -7 -12  132.98   11.91
  -3  -7 -12  141.17   12.54
  -3  -7 -13   16.74    4.58
  -3  -7 -13   20.02    4.39
  -3  -7 -14  310.09   17.87
  -3  -7 -15   20.24    3.46
  -3  -8  12   55.44    5.11
   3   8 -12   52.30    5.40
  -3  -8  11  109.13    9.06
  -3  -8  10    5.51    2.18
  -3  -8   9  179.96   14.50
  -3  -8   8  192.98   15.96
   3   8  -7   14.10    4.37
  -3  -8   7    9.54    3.68
   3   8  -6  762.39   36.45
  -3  -8   6  778.35   37.17
   3   8  -5   78.62   10.10
  -3  -8   5   78.58    9.89
   3   8  -5   70.27   23.30
   3   8  -4  439.19   25.17
   3   8  -4  393.86   51.30
  -3  -8   4  446.69   26.04
   3   8  -3    7.09    7.61
  -3  -8   3   31.33    6.62
   3   8  -2  247.17   39.15
  -3  -8   2  324.77   20.75
   3   8  -1  515.93   55.63
  -3  -8   1  550.13   28.20
   3   8   0   -3.81    4.81
   3   8   1 1053.05   78.22
   3   8   2   34.18   13.57
   3   8   3  501.61   51.25
  -3  -8  -3  556.46   50.48
   3   8   4  693.10   59.89
  -3  -8  -4  717.62   58.69
  -3  -8  -5  332.69   20.28
  -3  -8  -5  333.60   21.26
  -3  -8  -5  311.89   19.09
   3   8   5  313.42   39.56
  -3  -8  -5  345.26   40.24
  -3  -8  -5  309.04   20.93
  -3  -8  -5  331.80   19.51
  -3  -8  -5  332.49   20.00
  -3  -8  -6  327.66   20.64
  -3  -8  -6  315.98   20.48
  -3  -8  -6  329.70   19.78
  -3  -8  -6  354.51   40.48
   3   8   6  294.80   39.30
  -3  -8  -6  301.95   20.94
  -3  -8  -6  353.45   20.75
  -3  -8  -7   78.85    9.70
  -3  -8  -7   95.19    9.97
  -3  -8  -7  111.48   23.13
   3   8   7   86.56   20.58
  -3  -8  -7   87.02   10.45
  -3  -8  -7   88.43    9.65
  -3  -8  -8  900.76   38.62
  -3  -8  -8  886.04   36.97
  -3  -8  -8  986.88   71.34
  -3  -8  -8  891.35   39.62
  -3  -8  -9  197.83   15.80
  -3  -8  -9  214.23   15.53
  -3  -8  -9  182.13   15.77
  -3  -8  -9  221.65   16.43
  -3  -8  -9  170.79   13.92
  -3  -8 -10    5.48    2.50
  -3  -8 -10    0.21    2.45
  -3  -8 -10    3.67    2.17
  -3  -8 -10    8.01    3.44
  -3  -8 -11   26.09    5.45
  -3  -8 -11   28.14    5.47
  -3  -8 -11   21.13    5.37
  -3  -8 -12   12.07    4.00
  -3  -8 -12   11.45    4.00
  -3  -8 -13  152.35   12.80
  -3  -8 -14   13.59    3.58
  -3  -8 -15   43.42    4.79
  -3  -9  11    6.33    1.80
   3   9 -11    2.72    1.53
  -3  -9  10  133.50   10.19
  -3  -9   9  119.92   10.64
  -3  -9   8   14.98    4.53
  -3  -9   7  231.15   17.29
   3   9  -6   -1.78    2.09
  -3  -9   6    3.27    2.93
   3   9  -5   73.37    9.25
  -3  -9   5   70.08    9.69
   3   9  -4  242.51   17.50
  -3  -9   4  268.95   19.29
   3   9  -4  233.34   41.05
  -3  -9   3  205.93   16.69
   3   9  -3  192.40   36.60
  -3  -9   2  778.60   35.86
   3   9  -2  603.29   64.77
  -3  -9   1   13.68    3.91
   3   9  -1   18.10   13.06
  -3  -9   0  487.75   26.18
  -3  -9   0  481.00   25.18
   3   9   0  440.46   52.98
  -3  -9  -1  171.40   14.31
  -3  -9  -1  165.30   13.35
   3   9   1  153.01   29.73
  -3  -9  -2  598.88   29.27
  -3  -9  -2  546.20   27.51
   3   9   2  544.90   56.51
  -3  -9  -3   88.93   10.91
  -3  -9  -3   98.86   10.53
   3   9   3   79.04   21.43
  -3  -9  -3  114.78   23.27
  -3  -9  -3   95.74   10.02
  -3  -9  -4    7.49    3.97
  -3  -9  -4    3.82    1.83
   3   9   4   11.95    9.73
  -3  -9  -4    6.16    3.23
  -3  -9  -4    5.12    6.64
  -3  -9  -4    5.87    3.12
  -3  -9  -5  537.19   27.24
  -3  -9  -5  545.15   28.09
  -3  -9  -5  546.74   29.96
  -3  -9  -5  585.64   54.41
   3   9   5  632.56   58.30
  -3  -9  -5  551.86   30.02
  -3  -9  -5  549.83   27.82
  -3  -9  -5  593.70   27.65
  -3  -9  -6  133.43   12.38
  -3  -9  -6   84.74   10.84
  -3  -9  -6  138.64   11.97
   3   9   6  117.28   25.35
  -3  -9  -6  141.21   25.95
  -3  -9  -6  124.91   13.39
  -3  -9  -6  108.06   12.34
  -3  -9  -6   88.52    9.79
  -3  -9  -7  782.74   34.45
  -3  -9  -7  852.36   36.78
  -3  -9  -7  983.85   71.31
  -3  -9  -7  791.83   37.68
  -3  -9  -7  649.70   32.45
  -3  -9  -8   57.74    7.89
  -3  -9  -8   67.37    8.99
  -3  -9  -8   66.53    9.36
  -3  -9  -8   50.15    7.01
  -3  -9  -9   56.00    8.00
  -3  -9  -9   64.89    8.31
  -3  -9  -9   68.08   10.14
  -3  -9  -9   67.67    8.74
  -3  -9  -9   44.59    7.42
  -3  -9 -10  667.66   32.03
  -3  -9 -10  674.58   30.82
  -3  -9 -10  705.77   32.31
  -3  -9 -10  679.04   32.54
  -3  -9 -10  685.56   35.00
  -3  -9 -11    9.20    3.42
  -3  -9 -11    2.70    2.02
  -3  -9 -12   64.11    8.46
  -3  -9 -12   36.83    5.51
  -3  -9 -13   73.02    8.11
  -3  -9 -14   33.84    4.69
  -3  -9 -15   97.21    6.62
  -3 -10  10   86.32    6.63
   3  10 -10   78.52    6.51
  -3 -10   9   38.71    4.96
  -3 -10   8  166.77   12.34
  -3 -10   7   16.97    4.42
  -3 -10   6  196.17   15.28
   3  10  -5   58.82    7.91
  -3 -10   5   58.60    8.31
  -3 -10   4   55.55    7.92
  -3 -10   3  413.42   24.33
  -3 -10   2   -0.51    2.12
   3  10  -2   18.11    9.57
  -3 -10   1  579.34   29.27
   3  10  -1  562.49   62.42
  -3 -10   1  538.90   27.64
  -3 -10   0   20.72    4.82
   3  10   0   28.46   15.12
  -3 -10   0   24.90    5.14
  -3 -10  -1   26.10    5.52
  -3 -10  -1   40.05    6.40
   3  10   1   20.76   10.75
  -3 -10  -2  301.58   19.99
  -3 -10  -2  367.30   21.13
  -3 -10  -2  416.62   46.36
   3  10   2  356.05   46.78
  -3 -10  -3    3.31    2.23
  -3 -10  -3    3.12    1.96
   3  10   3    2.33    9.16
  -3 -10  -3    4.20    5.43
  -3 -10  -4  646.61   59.08
   3  10   4  594.75   58.31
  -3 -10  -4  618.53   29.74
  -3 -10  -5   20.27    5.44
  -3 -10  -5   16.79    4.63
  -3 -10  -5   14.61    4.64
  -3 -10  -5    3.76    4.60
  -3 -10  -5   25.20    5.57
  -3 -10  -5   11.19    2.80
  -3 -10  -6  147.19   12.91
  -3 -10  -6   95.36   11.17
  -3 -10  -6  158.03   12.91
  -3 -10  -6   99.38   11.65
  -3 -10  -6  107.83   10.69
  -3 -10  -7  261.07   17.79
  -3 -10  -7  172.73   15.35
  -3 -10  -7  253.31   16.82
  -3 -10  -7  206.33   17.56
  -3 -10  -7  282.87   17.29
  -3 -10  -8  170.62   13.40
  -3 -10  -8  164.32   15.53
  -3 -10  -9  243.71   16.32
  -3 -10  -9  260.80   17.51
  -3 -10  -9  251.68   19.02
  -3 -10 -10   42.92    6.28
  -3 -10 -10   45.29    7.42
  -3 -10 -10   46.04    6.91
  -3 -10 -11  228.58   14.76
  -3 -10 -11  230.75   16.73
  -3 -10 -12  297.45   17.87
  -3 -10 -13  137.94   10.41
  -3 -10 -14   59.42    5.62
  -3 -11   9  143.73    7.81
   3  11  -9  130.15    7.97
  -3 -11   8   33.77    4.11
  -3 -11   8   25.49    4.04
  -3 -11   7  270.13   15.57
  -3 -11   6  117.52   10.23
  -3 -11   5    9.38    2.82
  -3 -11   4  462.37   24.64
  -3 -11   3    2.87    2.29
  -3 -11   3   12.22    4.91
  -3 -11   2  282.61   18.05
  -3 -11   2  247.63   17.54
  -3 -11   1  334.75   19.87
  -3 -11   1  263.90   18.38
  -3 -11   0   75.36    8.97
  -3 -11   0   60.39    8.14
  -3 -11  -1  380.03   21.43
  -3 -11  -1  283.23   19.09
  -3 -11  -2   13.63    3.98
  -3 -11  -2   17.39    4.27
  -3 -11  -3   55.89    7.60
  -3 -11  -3   75.54    8.82
  -3 -11  -4  137.93   12.12
  -3 -11  -4  103.62   10.50
  -3 -11  -5  226.40   15.77
  -3 -11  -5  175.78   13.70
  -3 -11  -6  224.46   15.45
  -3 -11  -6  168.01   14.86
  -3 -11  -7   -3.96    3.25
  -3 -11  -7    2.54    2.62
  -3 -11  -8  206.40   14.53
  -3 -11  -8  211.09   15.33
  -3 -11  -8  212.17   16.61
  -3 -11  -9   77.93    8.28
  -3 -11  -9   74.39    8.42
  -3 -11  -9   80.72    9.68
  -3 -11 -10  248.88   14.91
  -3 -11 -10  258.32   15.62
  -3 -11 -10  246.27   17.10
  -3 -11 -11  133.99    9.85
  -3 -11 -11  125.14   10.91
  -3 -11 -12    6.13    1.99
  -3 -11 -13  206.60   11.59
  -3 -12   7  164.84    9.35
  -3 -12   7  174.38    9.92
  -3 -12   6   42.27    4.91
  -3 -12   6   38.51    4.88
  -3 -12   5  127.67    9.70
  -3 -12   5  144.55   10.48
  -3 -12   4   32.53    4.96
  -3 -12   4   34.58    5.39
  -3 -12   3   91.41    9.12
  -3 -12   3   84.38    8.73
  -3 -12   2  384.42   20.28
  -3 -12   2  313.87   18.76
  -3 -12   1  189.73   13.90
  -3 -12   1  177.13   13.37
  -3 -12   0  217.77   15.54
  -3 -12   0  259.69   16.34
  -3 -12  -1   61.55    7.78
  -3 -12  -1   67.12    7.81
  -3 -12  -2  415.12   22.49
  -3 -12  -3   53.42    7.19
  -3 -12  -4   71.15    8.26
  -3 -12  -4   80.83    8.45
  -3 -12  -5  289.96   17.69
  -3 -12  -6   40.90    6.23
  -3 -12  -7  445.40   22.07
  -3 -12  -7  425.93   23.30
  -3 -12  -8   76.67    7.84
  -3 -12  -8   86.10    8.69
  -3 -12  -8   71.25    8.49
  -3 -12  -9  132.42    9.98
  -3 -12  -9  128.89   10.16
  -3 -12  -9  118.13   10.58
  -3 -12 -10  216.00   12.50
  -3 -12 -10  186.13   13.00
  -3 -12 -11    1.24    1.35
  -3 -12 -11   -1.21    1.29
  -3 -13   6  122.53    6.99
  -3 -13   5   46.79    4.63
  -3 -13   5   54.15    4.91
  -3 -13   4  120.25    8.32
  -3 -13   4  123.87    8.58
  -3 -13   3   69.31    6.52
  -3 -13   3   77.07    7.17
  -3 -13   2   16.54    3.27
  -3 -13   2    5.65    1.84
  -3 -13   1  367.94   18.93
  -3 -13   0   21.41    4.24
  -3 -13  -1  320.17   17.81
  -3 -13  -2  186.61   12.61
  -3 -13  -2  133.42   10.60
  -3 -13  -3   13.20    3.51
  -3 -13  -3   11.87    2.77
  -3 -13  -4  727.75   30.27
  -3 -13  -5    6.29    2.23
  -3 -13  -6  128.22   10.00
  -3 -13  -7   75.94    7.30
  -3 -13  -8   85.27    7.36
  -3 -13  -8   94.72    8.05
  -3 -13  -9  174.49   10.40
  -3 -13  -9  197.57   11.24
  -3 -13 -10    2.08    1.25
  -3 -14   4  127.15    6.92
  -3 -14   3   19.04    2.64
  -3 -14   2  175.54    9.88
  -3 -14   1   25.88    3.68
  -3 -14   0   75.31    6.60
  -3 -14   0   75.96    6.34
  -3 -14  -1  159.32   10.33
  -3 -14  -1  162.64    9.68
  -3 -14  -2   22.95    3.70
  -3 -14  -3  243.36   13.39
  -3 -14  -4    5.80    2.15
  -3 -14  -5  137.63    9.27
  -3 -14  -6  101.33    7.50
  -3 -14  -7   37.81    4.24
  -3 -14  -7   33.67    4.14
  -3 -14  -8  113.74    7.23
  -3 -14  -8  116.84    7.50
  -3 -14  -9   12.45    1.97
  -3 -15   0  111.51    6.51
  -3 -15  -1   10.83    1.99
  -3 -15  -2  136.91    7.80
  -3 -15  -3   54.68    4.62
  -3 -15  -4  107.92    6.68
  -3 -15  -5   75.01    5.22
  -3 -15  -5   71.49    5.42
  -3 -15  -6   16.88    2.40
  -3 -15  -6   15.92    2.23
   4 -13  -7   25.42    3.21
   4 -13  -6    4.22    1.57
   4 -13  -5  123.00    8.42
   4 -13  -4    5.54    2.04
   4 -13  -3  140.55   10.04
   4 -13  -2   52.95    6.20
   4 -13  -1   38.61    7.27
   4 -13   0  108.63    9.27
   4 -13   1   -1.41    1.79
  -4  13  -2  132.86    7.79
   4 -12  -9   82.16    6.18
   4 -12  -8  158.93   10.02
   4 -12  -7   41.24    5.41
   4 -12  -6  234.97   14.06
   4 -12  -6  204.13   13.30
   4 -12  -5   -1.27    1.83
   4 -12  -5   -1.15    1.78
   4 -12  -4   51.55    6.62
   4 -12  -4   44.45    6.81
   4 -12  -3  155.47   11.74
   4 -12  -3  141.62   12.71
   4 -12  -2   92.82    8.77
   4 -12  -2   89.87   10.30
   4 -12  -1  175.00   14.75
   4 -12   0    4.39    2.90
   4 -12   1  132.96   12.40
  -4  12  -2   56.23    6.52
   4 -12   2   63.67    8.29
  -4  12  -3   48.04    5.75
   4 -12   3   53.01    7.35
  -4  12  -4  113.34    8.65
  -4  12  -5    3.41    1.84
  -4  12  -6  129.10    7.93
   4 -11 -10   59.84    5.56
   4 -11  -9  231.27   13.38
   4 -11  -8    5.56    2.35
   4 -11  -7  188.61   13.55
   4 -11  -7  173.91   13.51
   4 -11  -6   79.61    8.84
   4 -11  -6   48.78    7.52
   4 -11  -5   53.74    7.64
   4 -11  -5   62.04    8.71
   4 -11  -4   63.75    8.39
   4 -11  -4   55.35    8.85
   4 -11  -3   28.21    5.83
   4 -11  -3   37.81    7.18
   4 -11  -3   37.35    5.65
   4 -11  -2  260.98   17.41
   4 -11  -2  253.38   20.24
   4 -11  -2  272.24   17.32
   4 -11  -1    5.80    2.81
   4 -11  -1    5.46    3.66
   4 -11  -1    7.69    3.33
   4 -11   0  292.41   17.58
   4 -11   0  284.12   21.93
   4 -11   0  304.01   18.84
   4 -11   1   80.29   11.21
   4 -11   1   71.89    8.55
   4 -11   2   45.10    8.60
   4 -11   2   47.14    6.70
   4 -11   3  196.97   16.71
   4 -11   3  186.24   13.21
  -4  11  -4    4.47    1.71
   4 -11   4    4.69    1.70
   4 -11   4    6.69    3.28
   4 -11   4    6.15    2.07
  -4  11  -5  218.10   14.20
  -4  11  -6   59.40    6.67
  -4  11  -7   56.89    5.84
  -4  11  -8  105.57    7.14
   4 -10 -11  105.13    7.60
   4 -10 -11   96.74    7.23
   4 -10 -10  198.00   11.90
   4 -10  -9    6.21    2.25
   4 -10  -9    8.25    3.04
   4 -10  -8  245.16   14.99
   4 -10  -8  182.88   14.88
   4 -10  -7  149.80   11.82
   4 -10  -7  119.02   12.48
   4 -10  -6  158.40   12.70
   4 -10  -6  185.54   16.60
   4 -10  -5  154.85   15.51
   4 -10  -5  164.26   12.76
   4 -10  -4    0.42    2.37
   4 -10  -4   11.77    3.65
   4 -10  -3  469.31   26.19
   4 -10  -3  434.36   28.83
   4 -10  -3  420.64   23.67
   4 -10  -2   27.43    5.85
   4 -10  -2   25.65    7.38
   4 -10  -2   28.09    5.44
   4 -10  -1  267.55   18.62
   4 -10  -1  250.57   21.59
   4 -10  -1  261.79   18.21
   4 -10   0  336.99   20.15
   4 -10   0  292.29   23.73
   4 -10   0  310.07   20.26
   4 -10   1   59.04   10.12
   4 -10   1   72.68    9.01
   4 -10   2  540.57   25.09
   4 -10   2  517.07   32.33
   4 -10   2  539.60   27.81
   4 -10   3    2.77    2.10
   4 -10   3    2.30    3.37
   4 -10   3    4.66    2.51
   4 -10   4  157.17   11.47
   4 -10   4  145.69   15.52
   4 -10   4  166.02   12.82
  -4  10  -5  167.46   13.78
   4 -10   5  145.71   10.83
   4 -10   5  150.89   15.00
   4 -10   5  171.78   12.18
  -4  10  -6  117.04   10.81
   4 -10   6   90.91    7.85
  -4  10  -7  116.80   10.34
   4 -10   7  120.09    8.43
  -4  10  -8   -2.78    2.21
   4 -10   8   -0.24    0.85
  -4  10  -9   66.93    5.98
   4  -9 -12   24.93    3.45
   4  -9 -12   27.20    3.70
   4  -9 -11  235.69   13.62
   4  -9 -10   -0.99    1.99
   4  -9 -10    0.32    1.33
   4  -9  -9  208.55   16.36
   4  -9  -9  280.98   16.92
   4  -9  -8  114.22   10.84
   4  -9  -8  106.43   11.94
   4  -9  -7  202.18   17.67
   4  -9  -7  213.51   15.81
   4  -9  -6  407.34   27.43
   4  -9  -6  497.09   25.45
   4  -9  -5   33.61    6.25
   4  -9  -5   17.55    3.98
   4  -9  -5   35.78    8.01
   4  -9  -4  716.53   37.26
   4  -9  -4  525.07   27.95
   4  -9  -3  315.31   24.18
   4  -9  -3  284.82   19.19
   4  -9  -2   10.44    4.69
   4  -9  -2   14.59    4.31
   4  -9  -1  456.01   25.76
   4  -9  -1  443.62   30.31
   4  -9  -1  424.33   25.05
   4  -9   0   20.93    4.80
   4  -9   0   19.31    5.71
   4  -9   0   31.81    6.87
   4  -9   1  233.87   21.60
   4  -9   1  270.68   18.97
   4  -9   2  185.23   19.10
   4  -9   2  212.20   16.62
   4  -9   3  414.60   21.81
   4  -9   3  389.47   28.29
   4  -9   3  412.13   23.66
   4  -9   4  133.79   15.41
   4  -9   4  161.12   13.48
   4  -9   5   87.49   12.53
   4  -9   5   96.72    9.91
  -4   9  -6  182.59   15.36
   4  -9   6  208.34   18.83
   4  -9   6  185.05   12.83
  -4   9  -7   31.41    5.91
  -4   9  -8  257.74   16.60
  -4   9  -9   50.10    6.20
  -4   9 -10   22.26    3.56
   4  -8 -13   16.34    2.67
   4  -8 -12  149.32   10.45
   4  -8 -11    0.68    1.62
   4  -8 -11    2.86    2.32
   4  -8 -10  148.72   13.41
   4  -8 -10  188.00   13.90
   4  -8  -9  122.70   13.02
   4  -8  -9  113.93   11.31
   4  -8  -8   78.41   10.84
   4  -8  -8  103.80   10.94
   4  -8  -7  239.75   17.44
   4  -8  -7  214.97   19.06
   4  -8  -6    1.47    2.31
   4  -8  -6   -3.20    2.97
   4  -8  -5  305.48   23.11
   4  -8  -5  301.23   19.12
   4  -8  -4  251.61   20.98
   4  -8  -4  179.58   14.52
   4  -8  -3  408.73   28.08
   4  -8  -3  389.40   23.07
   4  -8  -2  473.43   30.74
   4  -8  -2  443.32   25.24
   4  -8  -1    9.13    5.07
   4  -8  -1    8.10    3.16
   4  -8   0  162.73   13.90
   4  -8   0  175.78   18.19
   4  -8   1   73.96   11.36
   4  -8   2  289.16   23.84
   4  -8   3  161.18   17.34
   4  -8   3  158.67   13.87
   4  -8   4    6.55    4.09
   4  -8   4    9.66    3.60
   4  -8   5  835.82   43.82
   4  -8   5  837.19   36.46
   4  -8   6    1.49    4.03
   4  -8   6    2.38    2.44
  -4   8  -7  130.01   11.06
  -4   8  -7  117.17   12.37
  -4   8  -8  252.56   15.56
  -4   8  -8  234.65   17.08
  -4   8  -9   13.78    4.08
  -4   8 -10  253.59   15.06
  -4   8 -11    0.29    1.24
   4  -7 -14    8.72    1.88
   4  -7 -13   56.47    6.02
   4  -7 -12  101.26    9.42
   4  -7 -12   97.88    9.15
   4  -7 -11  152.87   12.61
   4  -7 -11  156.70   13.41
   4  -7 -10  196.00   15.22
   4  -7 -10  195.23   16.40
   4  -7  -9   17.18    4.95
   4  -7  -8  282.88   21.92
   4  -7  -7  103.93   11.61
   4  -7  -7  110.47   13.33
   4  -7  -6  317.36   21.14
   4  -7  -6  345.86   24.62
   4  -7  -5   57.95   19.91
   4  -7  -5   84.26   11.96
   4  -7  -5   84.83    9.83
   4  -7  -4  107.58   26.71
   4  -7  -4  155.06   15.92
   4  -7  -4  127.92   11.65
   4  -7  -3 1070.67   87.73
   4  -7  -3 1289.80   55.67
   4  -7  -2   15.79   12.00
   4  -7  -2   13.13    4.38
   4  -7  -1  554.70   58.70
   4  -7  -1  667.73   36.60
   4  -7   0   65.88   19.75
   4  -7   0   81.44   11.39
   4  -7   1   41.29   15.00
   4  -7   1   39.39    8.24
   4  -7   2  435.62   50.58
   4  -7   2  562.49   33.49
   4  -7   3    7.36    9.13
   4  -7   3   12.71    4.92
   4  -7   4  533.19   33.49
   4  -7   4  639.81   61.61
  -4   7  -5   83.95    9.52
   4  -7   5   88.22   12.44
  -4   7  -6   71.80    8.74
   4  -7   6   59.32   10.50
   4  -7   6   70.17    8.30
  -4   7  -7  370.70   21.93
   4  -7   7  400.69   27.40
  -4   7  -8   39.68    6.30
  -4   7  -8   48.96    7.80
  -4   7  -9  120.90   11.78
  -4   7  -9  116.74   10.82
  -4   7 -10   26.96    5.18
  -4   7 -10   22.33    4.24
  -4   7 -11  196.38   12.54
   4  -7  11  187.77   11.34
  -4   7 -12   65.50    5.73
   4  -6 -14  197.17   11.16
   4  -6 -13   82.88    7.83
   4  -6 -13   67.10    7.02
   4  -6 -12   88.09    9.40
   4  -6 -11  229.82   17.51
   4  -6 -10   65.17    9.45
   4  -6  -9  529.21   30.92
   4  -6  -8   31.12   16.48
   4  -6  -8   20.74    6.41
   4  -6  -7  108.77   27.49
   4  -6  -7  120.71   13.90
   4  -6  -6  942.30   83.34
   4  -6  -6  944.30   44.99
   4  -6  -5   72.17   22.44
   4  -6  -5   57.65    9.09
   4  -6  -4  826.61   40.98
   4  -6  -4  839.07   74.92
   4  -6  -3   27.51   13.52
   4  -6  -2   28.15   13.75
   4  -6  -1  734.17   65.60
   4  -6   0  139.25   26.97
   4  -6   1  112.11   23.25
   4  -6   2   -5.40    7.22
   4  -6   3  745.80   39.02
   4  -6   3  915.47   71.51
  -4   6  -4  470.35   25.35
   4  -6   4  495.64   30.94
   4  -6   4  429.13   42.61
  -4   6  -5  233.28   17.09
   4  -6   5  282.75   22.71
  -4   6  -6   92.10   10.79
   4  -6   6  116.53   14.32
   4  -6   6  109.95   21.44
  -4   6  -7   -0.90    2.42
   4  -6   7    2.31    2.43
  -4   6  -8  317.95   21.28
  -4   6  -8  309.39   20.29
  -4   6  -9   63.66    8.89
  -4   6  -9   63.81    8.51
   4  -6   9   66.00    8.99
  -4   6 -10   80.65    9.05
  -4   6 -10   86.80    9.55
   4  -6  10   72.24    8.79
  -4   6 -11   55.72    7.02
  -4   6 -11   47.09    6.29
   4  -6  11   48.13    6.37
  -4   6 -12   29.38    4.43
   4  -6  12   27.66    4.43
   4  -6  13  140.21    8.38
   4  -5 -15  149.36    8.33
   4  -5 -14   40.75    4.93
   4  -5 -13   47.26    6.39
   4  -5 -12  432.12   23.99
   4  -5 -12  394.22   20.76
   4  -5 -11    5.64    2.05
   4  -5 -11    9.02    3.73
   4  -5 -10  236.90   19.02
   4  -5 -10  231.17   16.43
   4  -5  -9   26.19    6.38
   4  -5  -9   29.45    5.80
   4  -5  -8   85.08   25.85
   4  -5  -8   82.90   11.22
   4  -5  -8   77.63    9.36
   4  -5  -7  461.88   58.30
   4  -5  -7  451.38   28.11
   4  -5  -7  415.63   23.63
   4  -5  -6  160.96   15.69
   4  -5  -6  145.51   31.31
   4  -5  -5   36.07   15.96
   4  -5  -4  651.15   64.82
   4  -5  -3 1542.97  101.42
   4  -5  -2  245.21   36.26
   4  -5  -1  156.38   28.58
   4  -5   0  622.77   56.96
   4  -5   1   59.67   18.31
   4  -5   2  610.40   55.69
   4  -5   2  483.40   42.46
   4  -5   3  114.37   20.18
   4  -5   4   50.49   12.61
  -4   5  -5  700.89   33.72
   4  -5   5  741.75   38.51
   4  -5   5  806.87   58.43
  -4   5  -6    2.31    2.78
   4  -5   6   -4.07    4.12
   4  -5   6   -1.26    6.49
  -4   5  -7  442.14   25.94
   4  -5   7  509.74   31.10
   4  -5   7  486.88   46.94
  -4   5  -8   69.64    9.34
  -4   5  -8   67.39    9.11
   4  -5   8   49.52    8.27
   4  -5   8   52.68   14.92
  -4   5  -9   98.69   11.07
  -4   5  -9   98.92   11.14
   4  -5   9   81.01   10.43
  -4   5 -10  172.51   14.20
  -4   5 -10  165.35   14.33
   4  -5  10  164.13   14.78
  -4   5 -11   12.79    3.89
  -4   5 -11   10.85    3.46
   4  -5  11   14.53    4.20
  -4   5 -12  131.91   10.27
   4  -5  12  174.90   12.81
   4  -5  13    6.52    2.19
   4  -5  14   63.15    5.20
   4  -4 -14   40.78    5.38
   4  -4 -14   39.38    4.46
   4  -4 -13  258.98   16.79
   4  -4 -13  252.42   14.74
   4  -4 -12    9.85    3.36
   4  -4 -12   15.20    3.49
   4  -4 -11  209.58   17.41
   4  -4 -11  188.43   14.60
   4  -4 -10  416.31   26.77
   4  -4 -10  420.49   23.73
   4  -4  -9  619.60   69.53
   4  -4  -9  597.48   33.17
   4  -4  -9  541.57   28.19
   4  -4  -8  195.21   39.01
   4  -4  -8  226.65   19.03
   4  -4  -8  207.39   15.62
   4  -4  -7    8.33    6.71
   4  -4  -7   17.84    4.55
   4  -4  -6  518.36   59.87
   4  -4  -5  752.78   70.92
   4  -4  -4 1496.49  100.88
   4  -4  -3  610.41   59.14
   4  -4  -2  128.75   25.71
   4  -4  -1 5824.01  224.63
   4  -4   0    3.16    5.11
   4  -4   1  289.85   35.90
   4  -4   1  280.67   30.38
   4  -4   2 1098.47   65.27
   4  -4   3  468.56   40.49
   4  -4   4  645.16   49.83
   4  -4   5   -0.56    7.26
   4  -4   6  288.55   34.07
  -4   4  -6  281.67   19.29
  -4   4  -7  378.19   23.24
   4  -4   7  387.31   41.22
   4  -4   7  392.61   26.24
   4  -4   7  345.91   23.47
  -4   4  -7  376.42   22.17
  -4   4  -8  175.10   15.17
  -4   4  -8  182.12   15.50
   4  -4   8  165.89   15.86
   4  -4   8  195.19   29.20
  -4   4  -9  221.89   17.38
  -4   4  -9  298.18   20.35
   4  -4   9  288.59   21.26
   4  -4   9  282.13   36.76
  -4   4 -10    8.08    3.37
  -4   4 -10    5.43    2.22
   4  -4  10    0.66    2.26
  -4   4 -11  292.16   18.07
  -4   4 -11  285.91   19.27
   4  -4  11  270.89   19.74
  -4   4 -12   54.53    7.36
   4  -4  12   51.46    7.48
   4  -4  13   96.24    9.17
   4  -4  14   48.29    5.46
   4  -3 -15    4.29    1.52
   4  -3 -14  250.17   15.02
   4  -3 -14  244.71   13.06
   4  -3 -13   24.62    4.19
   4  -3 -13   23.39    4.70
   4  -3 -12  387.24   23.87
   4  -3 -12  384.12   20.93
   4  -3 -11  170.58   15.77
   4  -3 -11  149.97   12.92
   4  -3 -10   23.06    5.66
   4  -3 -10   20.13    5.13
   4  -3 -10   22.24    4.95
   4  -3  -9  523.81   64.57
   4  -3  -9  519.81   27.18
   4  -3  -9  549.14   30.41
   4  -3  -8   46.67   17.62
   4  -3  -8   27.27    5.62
   4  -3  -8   27.77    6.24
   4  -3  -7  901.49   81.19
   4  -3  -7  863.79   40.18
   4  -3  -6  453.22   55.52
   4  -3  -5  406.95   50.25
   4  -3  -4  879.42   72.96
   4  -3  -3  160.25   29.36
   4  -3  -2 1290.52   84.09
   4  -3  -1  120.11   22.89
   4  -3   0  692.98   56.00
   4  -3   1 3131.49  135.70
   4  -3   1 2838.71  119.13
   4  -3   2  193.08   24.38
   4  -3   3  820.01   54.15
   4  -3   4    7.56    5.66
   4  -3   5 1066.04   66.46
   4  -3   6  287.63   33.92
   4  -3   7   52.88   14.35
  -4   3  -7   56.39    7.85
  -4   3  -7   53.94    7.41
   4  -3   8  556.01   50.98
  -4   3  -8  579.76   29.57
  -4   3  -8  579.61   30.23
  -4   3  -8  569.90   29.50
   4  -3   9   -0.80    6.36
  -4   3  -9    4.29    3.18
  -4   3  -9    4.60    2.74
  -4   3  -9    3.97    4.74
  -4   3 -10  267.38   18.45
  -4   3 -10  335.00   21.79
   4  -3  10  293.31   22.13
  -4   3 -11  124.64   12.44
   4  -3  11  122.08   13.59
  -4   3 -12   66.57    8.91
   4  -3  12   51.80    8.26
   4  -3  13  203.52   15.36
   4  -3  14    2.46    1.50
   4  -3  15  136.82    8.75
   4  -2 -15  168.71   10.15
   4  -2 -14   10.40    2.99
   4  -2 -14   13.88    2.90
   4  -2 -13  196.54   15.02
   4  -2 -13  170.44   12.14
   4  -2 -12  242.54   15.70
   4  -2 -12  178.10   14.81
   4  -2 -11   70.01    8.53
   4  -2 -11   56.00    8.52
   4  -2 -10  742.33   78.20
   4  -2 -10  756.28   36.77
   4  -2 -10  708.97   33.18
   4  -2  -9    9.02   11.39
   4  -2  -9    0.04    3.32
   4  -2  -9    6.87    2.69
   4  -2  -8  649.23   70.01
   4  -2  -8  618.98   32.67
   4  -2  -7   26.79   12.10
   4  -2  -6  171.33   32.50
   4  -2  -5 1175.08   87.57
   4  -2  -4  111.99   25.06
   4  -2  -3 1064.08   76.28
   4  -2  -2  298.39   37.19
   4  -2  -1  244.77   32.56
   4  -2   0 1419.87   81.66
   4  -2   1  391.13   33.50
   4  -2   2  963.16   56.86
   4  -2   3  197.77   24.45
   4  -2   4 1093.92   64.07
   4  -2   5  939.71   60.20
   4  -2   6   11.24    6.62
   4  -2   7 2109.55  105.77
   4  -2   8   44.81   14.37
  -4   2  -8   33.34    6.31
  -4   2  -8   37.20    6.47
   4  -2   9  485.49   47.95
  -4   2  -9  480.03   27.17
  -4   2  -9  473.27   26.81
   4  -2  10  209.59   31.41
  -4   2 -10  230.45   17.66
  -4   2 -10  216.17   17.39
  -4   2 -11   79.38    9.84
  -4   2 -11   98.12   11.21
  -4   2 -12  326.17   20.19
   4  -2  12  246.76   20.09
   4  -2  13    1.93    2.57
   4  -2  14  151.36   12.37
   4  -2  15   65.10    6.53
  -4   2 -15   65.22    5.26
   4  -1 -15   12.87    2.62
   4  -1 -14   76.93    8.15
   4  -1 -14   70.05    6.57
   4  -1 -13  198.96   14.70
   4  -1 -13  278.55   15.65
   4  -1 -12  130.70   11.43
   4  -1 -12  123.60   12.06
   4  -1 -11 1017.08   39.96
   4  -1 -11  819.88   40.37
   4  -1 -10  358.27   53.17
   4  -1 -10  362.58   21.41
   4  -1 -10  345.32   23.47
   4  -1  -9  834.83   81.61
   4  -1  -9  850.68   40.21
   4  -1  -9  817.04   36.02
   4  -1  -8  289.96   45.81
   4  -1  -8  307.51   21.42
   4  -1  -7   -1.34   10.40
   4  -1  -6 1475.38  101.73
   4  -1  -5   -0.50    7.48
   4  -1  -4  465.57   49.85
   4  -1  -3 1727.47   99.64
   4  -1  -2  782.40   60.02
   4  -1  -1  180.52   27.20
   4  -1  -1  216.89   15.67
   4  -1   0  148.08   22.71
   4  -1   1 1338.74   67.07
   4  -1   2  972.57   55.37
   4  -1   3 2662.98  109.08
   4  -1   4 1809.57   85.86
   4  -1   5  195.07   25.30
   4  -1   6  258.68   30.19
   4  -1   7  384.20   39.19
   4  -1   8  112.83   21.96
  -4   1  -8  126.66   12.42
  -4   1  -8  142.62   13.08
   4  -1   9  888.50   66.27
  -4   1  -9  915.51   40.08
  -4   1  -9  865.59   39.64
   4  -1  10   76.62   18.89
  -4   1 -10   83.42   10.32
  -4   1 -10   77.67   10.23
  -4   1 -11  366.39   22.79
  -4   1 -11  369.85   23.35
  -4   1 -12   68.70    8.75
  -4   1 -12   62.70    8.77
   4  -1  13  144.63   14.35
  -4   1 -13  163.14   13.14
   4  -1  14   43.02    7.06
  -4   1 -14   54.31    6.15
   4  -1  15   53.14    6.32
  -4   1 -15   57.70    5.40
   4  -1  16   70.49    5.70
   4   0 -15   67.82    6.18
   4   0 -14  144.94   10.39
   4   0 -14  147.11    9.61
   4   0 -13    0.11    1.83
   4   0 -13    1.51    1.36
   4   0 -12  267.09   18.84
   4   0 -12  265.60   16.81
   4   0 -11   79.84    9.18
   4   0 -11   99.00   11.61
   4   0 -10  102.58   27.30
   4   0 -10  130.09   13.50
   4   0  -9  358.90   51.36
   4   0  -9  393.06   25.05
   4   0  -8   -0.07    6.31
   4   0  -8   12.23    4.02
   4   0  -7  733.71   70.84
   4   0  -6  170.52   32.40
   4   0  -5  735.73   65.18
   4   0  -4  918.31   48.77
   4   0  -4  844.46   67.59
   4   0  -3 1402.32   86.92
   4   0  -3 1522.18   63.88
   4   0  -2  125.66   21.96
   4   0  -2  126.99   13.92
   4   0  -1  350.29   24.45
   4   0  -1  325.70   34.52
   4   0   0 1415.14   75.63
   4   0   1  559.70   37.88
   4   0   2  102.06   16.14
   4   0   3 4190.77  149.43
   4   0   4    4.29    4.66
   4   0   5  291.85   30.46
   4   0   6   27.28   10.27
   4   0   7  721.12   54.02
   4   0   8  350.12   37.86
   4   0   9   10.60    4.31
  -4   0  -9    7.07    3.41
  -4   0  -9    2.21    1.96
   4   0  10  885.49   67.09
  -4   0 -10  884.08   38.95
  -4   0 -10  823.83   39.22
  -4   0 -11   42.16    7.22
  -4   0 -11   35.53    6.90
  -4   0 -12  207.00   15.84
  -4   0 -12  186.48   15.66
  -4   0 -13  250.18   16.48
  -4   0 -13  243.38   17.15
   4   0  14    2.40    3.14
  -4   0 -14    2.82    1.97
   4   0  15   99.76    9.36
  -4   0 -15  102.28    7.73
   4   0  16    0.89    1.21
   4   1 -15   94.18    7.18
   4   1 -14    6.05    2.02
   4   1 -14    2.32    1.78
   4   1 -13   84.57    7.87
   4   1 -13   73.07    8.53
   4   1 -12   22.82    5.47
   4   1 -12   27.00    5.11
   4   1 -11    5.11    3.42
  -4  -1  10  111.36   22.99
   4   1 -10  109.82   12.70
   4   1  -9  123.65   29.68
   4   1  -9  138.67   14.23
   4   1  -8  992.43   85.45
   4   1  -8 1026.45   45.14
   4   1  -7  136.00   29.62
   4   1  -6  555.76   57.46
   4   1  -5  396.53   36.15
   4   1  -5  359.14   43.79
   4   1  -4  109.12   22.44
   4   1  -4   67.86   13.41
   4   1  -3 1627.21   92.51
   4   1  -3 1757.78   78.07
   4   1  -2  443.72   32.33
   4   1  -2  416.46   39.76
   4   1  -1 1922.92   78.55
   4   1  -1 1766.81   88.66
   4   1   0  507.53   34.41
   4   1   0  443.81   37.51
   4   1   1  314.59   30.18
   4   1   1  290.98   25.83
   4   1   2 2038.14   84.21
  -4  -1  -3  219.00   14.52
   4   1   3  208.95   22.16
   4   1   4  701.28   45.08
   4   1   5  562.55   41.68
   4   1   6 1882.37   90.39
   4   1   7 1225.60   72.13
   4   1   8   58.54   15.34
   4   1   9 1165.48   75.42
  -4  -1  -9 1197.07   47.36
   4   1  10   23.41   11.10
  -4  -1 -10   -1.20    2.78
   4   1  11   68.73   17.28
  -4  -1 -11   82.27    9.67
  -4  -1 -11   64.86    8.98
  -4  -1 -12  215.46   16.08
  -4  -1 -12  267.07   18.86
  -4  -1 -13    5.69    2.31
  -4  -1 -13    5.09    2.38
   4   1  14  178.90   14.88
  -4  -1 -14  155.80   11.72
  -4  -1 -14  182.84   13.29
   4   1  15   24.95    4.73
  -4  -1 -15   28.38    4.20
   4   1  16   37.73    4.62
   4   2 -15    7.95    1.92
   4   2 -14  122.35    8.03
   4   2 -14  116.59    9.06
   4   2 -13  210.04   12.84
   4   2 -13  204.10   14.63
   4   2 -12   72.10    9.32
   4   2 -11  320.09   21.92
   4   2 -10   17.20    5.78
  -4  -2   9  192.80   15.12
  -4  -2   9  187.47   28.70
  -4  -2   8  345.38   20.86
   4   2  -8  320.15   46.51
   4   2  -7  303.37   37.79
   4   2  -7  273.92   40.68
   4   2  -6  507.57   47.70
   4   2  -6  561.07   56.16
   4   2  -5   56.92   17.50
   4   2  -5   37.00   11.83
   4   2  -4 1229.83   70.14
   4   2  -4 1155.13   76.87
   4   2  -3  279.54   29.31
   4   2  -3  254.74   31.55
   4   2  -2  543.99   40.01
   4   2  -2  520.04   43.77
   4   2  -1  473.03   36.12
   4   2  -1  397.98   35.92
   4   2   0    4.07    6.37
   4   2   0    3.83    3.80
   4   2   1 2755.66  107.83
   4   2   1 2728.72  101.27
   4   2   2   13.43    5.86
  -4  -2  -3  349.88   24.20
   4   2   3  381.79   29.30
  -4  -2  -4  687.67   36.95
   4   2   4  708.45   43.60
   4   2   5  354.92   31.50
   4   2   6  288.48   29.81
   4   2   7   20.69    8.75
   4   2   8  366.04   37.70
   4   2   9  180.72   27.11
  -4  -2  -9  180.82   13.48
   4   2  10  183.59   28.92
  -4  -2 -10  182.18   14.32
  -4  -2 -10  176.26   13.49
   4   2  11  241.58   33.16
  -4  -2 -11  203.45   15.47
  -4  -2 -11  201.36   15.98
  -4  -2 -11  266.04   18.91
  -4  -2 -12    8.17    2.96
  -4  -2 -12    8.43    3.95
  -4  -2 -12   10.92    3.69
  -4  -2 -13  211.19   15.35
  -4  -2 -13  266.14   17.66
  -4  -2 -14   31.63    4.93
  -4  -2 -14   39.69    5.98
   4   2  15  115.53   10.60
  -4  -2 -15  139.24    9.52
   4   2  16   24.26    3.65
   4   3 -14  122.42    8.91
   4   3 -13   52.32    5.78
   4   3 -13   58.30    7.08
  -4  -3  12  319.61   17.47
   4   3 -12  294.09   19.66
  -4  -3  11    0.65    1.77
   4   3 -11    0.42    2.96
  -4  -3  10  137.09   12.62
   4   3 -10  140.34   14.34
  -4  -3   9   49.28    7.59
  -4  -3   8   75.47    9.38
  -4  -3   8   63.56   16.34
  -4  -3   7  726.32   33.77
   4   3  -7  816.84   70.84
   4   3  -6   21.77   11.31
   4   3  -6   41.70   15.58
   4   3  -5 1665.96   94.60
   4   3  -5 1670.14   97.35
   4   3  -4    0.71    4.70
   4   3  -4   -1.15    4.48
   4   3  -3  166.83   24.02
   4   3  -3  174.43   25.24
   4   3  -2 1053.67   64.74
   4   3  -2 1146.42   65.18
   4   3  -1  393.67   35.84
   4   3  -1  348.71   31.46
   4   3   0  398.55   35.67
   4   3   0  370.67   30.38
   4   3   1  403.67   36.35
   4   3   1  371.80   29.41
   4   3   2 1189.77   58.02
   4   3   2 1138.18   53.57
   4   3   3 1001.14   50.06
   4   3   4   55.11   10.91
  -4  -3  -4   50.78   10.36
  -4  -3  -5  318.32   27.41
   4   3   5  330.06   29.12
   4   3   6   12.31    7.66
   4   3   7  520.45   42.08
   4   3   8  289.43   32.52
   4   3   9  368.51   38.83
  -4  -3  -9  406.83   22.19
   4   3  10  668.17   55.72
  -4  -3 -10  702.38   32.14
  -4  -3 -10  733.54   33.86
   4   3  11    3.66    6.14
  -4  -3 -11    1.58    1.86
  -4  -3 -11   -1.68    2.18
  -4  -3 -12  190.04   15.18
  -4  -3 -12  247.02   17.54
  -4  -3 -13   66.20    8.24
  -4  -3 -13  100.94   10.48
  -4  -3 -14  124.07   10.46
  -4  -3 -14  164.69   12.17
   4   3  15  127.07   10.85
  -4  -3 -15  144.67    9.83
   4   3  16    4.52    1.87
   4   4 -14    5.58    1.94
  -4  -4  13  160.06    9.82
   4   4 -13  141.05   11.10
  -4  -4  12    7.80    3.38
   4   4 -12    5.16    2.66
  -4  -4  11  215.58   15.27
   4   4 -11  219.30   17.10
  -4  -4  10  121.04   11.82
  -4  -4   9   29.87    5.70
   4   4  -8  911.25   77.96
  -4  -4   8  932.62   41.05
   4   4  -7   23.03   12.43
  -4  -4   7   40.46    7.16
   4   4  -6  411.06   48.11
   4   4  -5  708.18   57.46
   4   4  -5  653.56   59.39
   4   4  -4   72.77   19.29
   4   4  -4  107.18   20.45
   4   4  -3  983.24   69.07
   4   4  -3 1129.49   64.99
   4   4  -2  341.00   37.18
   4   4  -2  394.04   32.44
   4   4  -1  916.44   62.34
   4   4  -1  997.27   50.85
   4   4   0 2013.21   98.41
   4   4   1 3714.73  149.35
   4   4   2    8.93    4.14
   4   4   2    8.84    4.42
   4   4   3    9.52    4.13
  -4  -4  -4 3008.63  117.85
   4   4   4 3079.33  110.42
  -4  -4  -5  941.12   54.65
   4   4   5  878.07   49.70
  -4  -4  -6  324.88   31.23
   4   4   6  330.68   30.17
   4   4   7  825.77   53.40
  -4  -4  -8  217.46   15.42
   4   4   8  224.35   27.97
  -4  -4  -8  198.82   15.35
  -4  -4  -8  234.22   16.87
  -4  -4  -9  885.04   38.30
   4   4   9  884.92   61.75
  -4  -4  -9  913.92   39.57
  -4  -4  -9  958.05   40.80
  -4  -4 -10    3.22    1.74
  -4  -4 -10    8.76    3.98
   4   4  11  170.61   27.23
  -4  -4 -11  201.48   14.90
  -4  -4 -11  154.53   13.86
  -4  -4 -12   74.67    8.32
  -4  -4 -12   52.91    7.74
  -4  -4 -13   42.12    5.67
  -4  -4 -13   29.67    5.44
  -4  -4 -13   44.15    7.22
  -4  -4 -14  210.61   14.21
  -4  -4 -14  302.36   16.56
  -4  -4 -15    0.92    1.45
  -4  -4 -15    2.68    1.25
  -4  -4 -15    3.35    1.62
   4   4  16   58.02    5.49
   4   5 -14   93.62    6.51
  -4  -5  13   79.40    6.28
   4   5 -13   57.53    6.37
  -4  -5  12  156.70   11.04
   4   5 -12  151.37   12.37
  -4  -5  11  340.43   19.60
   4   5 -11  354.26   21.91
  -4  -5  10   77.75    9.18
  -4  -5   9  119.29   12.31
   4   5  -8   35.67   10.24
  -4  -5   8   35.69    6.55
   4   5  -7  540.76   60.06
  -4  -5   7  532.43   29.03
   4   5  -6  549.42   58.74
  -4  -5   6  592.45   30.72
   4   5  -5  219.33   35.69
   4   5  -4  728.87   64.20
   4   5  -3   31.54   12.36
   4   5  -2 1575.74   92.48
   4   5  -1  520.64   48.36
   4   5   0  163.60   26.06
   4   5   1  759.13   58.05
   4   5   2  121.64   22.31
   4   5   3 2384.30  116.49
  -4  -5  -4  234.96   27.01
  -4  -5  -5   52.36   13.55
  -4  -5  -6  945.05   60.02
  -4  -5  -7  118.76   20.10
  -4  -5  -8  301.83   19.11
  -4  -5  -8  295.86   19.24
  -4  -5  -8  305.68   19.79
  -4  -5  -9  162.84   14.09
  -4  -5  -9  142.05   13.16
  -4  -5  -9  148.94   13.56
  -4  -5 -10  247.68   17.20
  -4  -5 -10  242.93   17.58
  -4  -5 -10  272.79   18.55
  -4  -5 -11  301.16   18.91
  -4  -5 -11  230.46   17.38
  -4  -5 -12   19.96    4.52
  -4  -5 -12   10.02    3.36
  -4  -5 -13  343.15   18.33
  -4  -5 -13  340.04   19.39
  -4  -5 -14   16.51    3.44
  -4  -5 -14   18.78    3.67
  -4  -5 -15  122.34    9.15
  -4  -5 -15  115.34    8.21
  -4  -5 -15  109.45    7.76
   4   5  16   62.62    5.10
  -4  -6  13   58.57    4.82
   4   6 -13   59.31    5.71
  -4  -6  12  146.06    9.99
   4   6 -12  131.51   10.70
  -4  -6  11   -1.90    2.11
   4   6 -11   -0.52    1.88
  -4  -6  10  227.63   16.29
  -4  -6   9   30.41    6.27
  -4  -6   8  185.30   15.91
   4   6  -7  150.41   32.98
  -4  -6   7  146.89   14.09
   4   6  -6   41.51   13.75
  -4  -6   6   43.08    7.45
   4   6  -5 1058.25   84.80
  -4  -6   5 1057.35   45.06
   4   6  -4    8.69    8.79
  -4  -6   4    0.20    2.54
   4   6  -3  386.68   47.01
   4   6  -2  183.41   30.65
   4   6  -1   31.20   11.71
   4   6   0 1747.73  100.74
   4   6   1   10.51    9.61
   4   6   2  980.49   70.72
   4   6   3  100.93   21.34
   4   6   4  309.76   38.80
  -4  -6  -4  325.98   34.47
  -4  -6  -5  682.97   51.98
  -4  -6  -6   18.12    8.62
  -4  -6  -7  270.12   18.06
  -4  -6  -7  307.40   34.63
  -4  -6  -7  265.14   18.02
  -4  -6  -7  279.49   18.56
  -4  -6  -7  287.09   18.53
  -4  -6  -8  327.89   19.70
  -4  -6  -8  360.91   21.74
  -4  -6  -8  372.11   22.01
  -4  -6  -8  365.42   22.13
  -4  -6  -9  684.10   32.84
  -4  -6  -9  658.18   32.45
  -4  -6  -9  688.68   33.08
  -4  -6  -9  693.62   33.02
  -4  -6 -10  435.00   24.27
  -4  -6 -10  402.42   23.76
  -4  -6 -10  438.56   24.47
  -4  -6 -11    2.05    2.35
  -4  -6 -11    0.73    1.31
  -4  -6 -12  457.46   24.15
  -4  -6 -12  473.91   24.83
  -4  -6 -13   58.33    6.93
  -4  -6 -13   46.78    6.41
  -4  -6 -14  185.45   12.08
  -4  -6 -14  182.44   11.47
  -4  -6 -15  246.73   13.75
  -4  -7  12    9.78    2.28
   4   7 -12    7.11    2.18
  -4  -7  11  156.96   11.18
   4   7 -11  166.33   12.37
  -4  -7  11  151.76    9.85
  -4  -7  10   49.80    7.09
  -4  -7   9   18.91    4.55
  -4  -7   8  534.63   28.83
  -4  -7   7   35.70    6.98
   4   7  -6  167.87   33.76
  -4  -7   6  166.73   14.85
   4   7  -5  133.29   29.43
  -4  -7   5  156.75   14.44
   4   7  -4  325.16   45.68
  -4  -7   4  367.98   22.79
   4   7  -3  605.39   62.13
  -4  -7   3  630.66   31.60
  -4  -7   3  651.73   29.99
   4   7  -2   36.06   14.16
  -4  -7   2   35.65    6.29
   4   7  -1 1030.24   78.51
   4   7   0   64.40   18.99
   4   7   1 1065.92   77.95
   4   7   2  335.01   41.25
   4   7   3  252.20   35.05
   4   7   4  467.54   49.88
  -4  -7  -4  531.88   47.22
  -4  -7  -5   51.44   14.98
   4   7   5   42.22   14.93
   4   7   6  656.65   60.45
  -4  -7  -6  659.69   54.34
  -4  -7  -6  613.16   28.74
  -4  -7  -6  659.04   31.33
  -4  -7  -6  680.85   31.29
  -4  -7  -6  683.31   31.77
  -4  -7  -7  248.13   16.50
  -4  -7  -7  259.23   18.08
   4   7   7  259.45   37.09
  -4  -7  -7  275.04   34.16
  -4  -7  -7  247.13   17.64
  -4  -7  -7  263.87   18.27
  -4  -7  -8  164.73   13.41
  -4  -7  -8  166.35   14.53
   4   7   8  167.81   30.78
  -4  -7  -8  184.64   14.89
  -4  -7  -8  184.02   14.91
  -4  -7  -9  178.54   15.02
  -4  -7  -9  182.82   13.81
  -4  -7  -9  182.74   15.01
  -4  -7  -9  130.06   12.91
  -4  -7  -9  190.50   15.10
  -4  -7 -10   18.45    4.59
  -4  -7 -10   21.65    5.05
  -4  -7 -10   19.91    4.84
  -4  -7 -10   14.76    4.23
  -4  -7 -11  513.17   26.13
  -4  -7 -11  510.59   26.31
  -4  -7 -12   23.62    4.99
  -4  -7 -13   22.98    3.99
  -4  -7 -14  192.48   13.34
  -4  -7 -15   33.17    4.19
  -4  -8  12   37.14    3.64
   4   8 -12   40.78    4.21
  -4  -8  11  153.57    9.99
   4   8 -11  144.26   10.32
  -4  -8  10   72.69    7.67
  -4  -8   9  210.88   15.19
  -4  -8   9  217.37   13.25
  -4  -8   8    2.80    2.83
  -4  -8   8    1.43    1.52
  -4  -8   7  155.66   14.05
  -4  -8   7  133.78   11.55
  -4  -8   6  433.07   24.88
  -4  -8   6  328.28   19.97
   4   8  -5  209.63   39.70
  -4  -8   5  215.55   17.28
  -4  -8   5  180.33   14.09
   4   8  -4  268.86   43.03
  -4  -8   4  315.57   20.67
  -4  -8   4  225.21   16.13
   4   8  -3   52.71   18.71
  -4  -8   3   68.86    9.65
  -4  -8   3   77.74    8.81
   4   8  -2  599.40   63.65
  -4  -8   2  636.75   32.19
  -4  -8   2  671.31   30.35
   4   8  -1    3.06    8.31
  -4  -8   1    5.86    3.51
  -4  -8   1    2.10    1.69
   4   8   0  240.72   38.10
  -4  -8   0  228.75   17.01
  -4  -8   0  229.08   15.55
   4   8   1  390.65   47.63
  -4  -8  -1  391.48   23.16
   4   8   2    5.90    4.31
  -4  -8  -2   11.42    4.05
   4   8   3  732.76   65.49
  -4  -8  -3  809.82   36.17
  -4  -8  -3  793.01   34.23
  -4  -8  -4   21.59    4.49
   4   8   4   35.57   15.68
  -4  -8  -4   16.47    4.07
  -4  -8  -4   20.17    9.56
  -4  -8  -4   15.72    3.94
  -4  -8  -4   19.09    4.68
   4   8   5  738.72   65.69
  -4  -8  -5  786.83   61.47
  -4  -8  -5  717.81   32.30
  -4  -8  -5  749.80   34.29
  -4  -8  -5  769.05   34.03
  -4  -8  -5  787.44   35.00
   4   8   6  347.70   43.97
  -4  -8  -6  356.04   40.68
  -4  -8  -6  305.91   18.85
  -4  -8  -6  316.88   20.45
  -4  -8  -6  342.21   20.98
  -4  -8  -6  317.02   20.01
  -4  -8  -7   94.99    9.83
  -4  -8  -7  103.96   11.20
  -4  -8  -7   98.60   20.94
   4   8   7   98.88   23.96
  -4  -8  -7   59.92    8.58
  -4  -8  -7   94.22   10.56
  -4  -8  -8  252.65   16.86
  -4  -8  -8  272.77   18.89
   4   8   8  246.18   37.47
  -4  -8  -8  276.29   36.25
  -4  -8  -8  278.59   18.85
  -4  -8  -8  185.61   15.90
  -4  -8  -8  273.66   18.39
  -4  -8  -9    0.03    2.34
  -4  -8  -9    3.62    2.05
  -4  -8  -9   -1.10    2.28
  -4  -8  -9   -2.13    2.90
  -4  -8  -9    1.58    2.33
  -4  -8 -10   47.68    7.61
  -4  -8 -10   36.40    6.29
  -4  -8 -11  218.41   15.96
  -4  -8 -11  218.70   16.15
  -4  -8 -12  169.43   12.94
  -4  -8 -13   27.73    5.15
  -4  -8 -14   55.37    6.36
  -4  -8 -15   70.29    5.95
  -4  -9  11   34.97    3.77
   4   9 -11   26.73    3.51
  -4  -9  10  126.66    9.10
   4   9 -10  103.50    8.37
  -4  -9   9   32.43    5.23
  -4  -9   8  405.88   22.29
  -4  -9   7   60.09    8.15
  -4  -9   6  141.28   13.42
  -4  -9   5  162.24   14.60
  -4  -9   4   11.75    4.04
   4   9  -3  102.10   27.18
  -4  -9   3  155.01   14.32
   4   9  -2   14.04   11.51
  -4  -9   2    4.15    2.66
  -4  -9   1  127.96   11.56
   4   9  -1  122.09   26.79
  -4  -9   1  141.31   13.30
  -4  -9   0  846.88   37.14
   4   9   0  858.57   76.40
  -4  -9   0  929.56   40.75
  -4  -9   0  976.89   38.25
  -4  -9  -1  152.38   12.62
   4   9   1  139.72   29.53
  -4  -9  -1  154.90   13.94
  -4  -9  -1  152.66   12.51
  -4  -9  -2  465.24   24.26
   4   9   2  443.34   52.79
  -4  -9  -2  464.95   26.10
  -4  -9  -2  477.99   24.38
   4   9   3   88.30   23.47
  -4  -9  -3   81.59    9.00
  -4  -9  -3   80.42   20.79
  -4  -9  -3   74.35    9.41
  -4  -9  -3   84.74    9.17
  -4  -9  -4  264.88   17.69
  -4  -9  -4  250.52   16.85
  -4  -9  -4  332.95   40.38
   4   9   4  246.12   38.21
  -4  -9  -4  271.59   18.75
  -4  -9  -4  260.87   17.39
   4   9   5  254.30   38.51
  -4  -9  -5  316.22   39.55
  -4  -9  -5  279.05   17.87
  -4  -9  -5  273.43   18.49
  -4  -9  -5  294.22   18.60
  -4  -9  -5  279.27   18.92
   4   9   6  189.81   33.42
  -4  -9  -6  184.61   29.96
  -4  -9  -6  184.96   15.04
  -4  -9  -6  171.01   13.63
  -4  -9  -6  196.38   15.43
  -4  -9  -6  207.55   15.32
   4   9   7  645.40   62.53
  -4  -9  -7  823.33   64.85
  -4  -9  -7  753.15   34.98
  -4  -9  -7  740.63   33.00
  -4  -9  -7  770.31   34.75
  -4  -9  -8   69.71    9.14
  -4  -9  -8   77.86    9.54
  -4  -9  -8   59.21    8.21
  -4  -9  -9  274.35   17.12
  -4  -9  -9  262.46   18.27
  -4  -9  -9  279.68   18.61
  -4  -9  -9  227.40   16.36
  -4  -9 -10  232.60   16.85
  -4  -9 -10  258.11   17.64
  -4  -9 -10  260.43   16.37
  -4  -9 -11   73.61    8.31
  -4  -9 -11   84.56    9.02
  -4  -9 -11   72.48    9.41
  -4  -9 -12   66.46    8.55
  -4  -9 -13    2.81    1.84
  -4  -9 -14  332.64   16.32
  -4 -10  10   13.18    2.46
  -4 -10   9  132.20    9.23
   4  10  -9  116.69    8.54
  -4 -10   8  101.30    9.06
  -4 -10   7   56.22    7.35
  -4 -10   6  451.45   24.37
  -4 -10   5   46.10    7.55
  -4 -10   4  157.28   13.98
  -4 -10   3   85.12   10.21
  -4 -10   2  252.71   18.30
  -4 -10   2  226.69   15.88
  -4 -10   1  609.26   30.63
  -4 -10   1  551.44   27.42
  -4 -10   0    2.78    2.82
  -4 -10   0   -0.46    1.84
   4  10   0   -1.37    8.77
  -4 -10  -1  159.78   14.05
  -4 -10  -1  157.22   12.96
   4  10   1  141.78   30.23
  -4 -10  -2  232.36   17.31
  -4 -10  -2  229.44   15.96
   4  10   2  203.52   36.17
  -4 -10  -2  248.41   35.91
  -4 -10  -3  406.28   22.38
  -4 -10  -3  446.10   48.26
   4  10   3  336.81   46.62
  -4 -10  -3  407.69   23.70
   4  10   4    2.82    4.58
  -4 -10  -4   27.25    5.38
  -4 -10  -4   38.32   14.02
  -4 -10  -4   14.96    3.77
   4  10   5   27.38   14.83
  -4 -10  -5   24.56    5.17
  -4 -10  -5   32.05    6.04
  -4 -10  -5   16.20    4.30
  -4 -10  -5   29.54    5.91
  -4 -10  -6  549.84   30.64
  -4 -10  -6  566.22   29.35
  -4 -10  -7    2.32    1.71
  -4 -10  -7    3.57    2.28
  -4 -10  -7    0.27    1.64
  -4 -10  -7    1.86    2.01
  -4 -10  -8  617.97   29.95
  -4 -10  -8  639.35   28.60
  -4 -10  -8  656.36   30.65
  -4 -10  -8  626.84   32.18
  -4 -10  -8  526.68   27.19
  -4 -10  -9  153.82   12.95
  -4 -10  -9  145.71   11.79
  -4 -10  -9  144.98   12.71
  -4 -10  -9  141.48   13.72
  -4 -10  -9  154.41   12.11
  -4 -10 -10   -0.45    2.97
  -4 -10 -10    1.03    1.87
  -4 -10 -11  275.90   16.40
  -4 -10 -11  284.85   18.23
  -4 -10 -12    2.45    1.74
  -4 -10 -13  169.11   11.30
  -4 -10 -14  115.01    7.67
  -4 -11   9   90.18    6.14
  -4 -11   8    7.77    2.12
  -4 -11   8    6.78    1.68
  -4 -11   7  177.98   11.75
  -4 -11   7  173.18   10.25
  -4 -11   6   32.02    5.12
  -4 -11   6   33.51    4.76
  -4 -11   5  203.63   14.53
  -4 -11   5  192.20   12.70
  -4 -11   4  259.41   17.29
  -4 -11   4  252.96   15.59
  -4 -11   3  129.16   12.04
  -4 -11   3  117.27   10.40
  -4 -11   2  304.59   19.70
  -4 -11   2  290.87   17.78
  -4 -11   1   37.36    6.85
  -4 -11   1   44.93    6.61
  -4 -11   0  167.01   14.30
  -4 -11   0  218.18   15.12
  -4 -11  -1   21.26    5.12
  -4 -11  -1   36.74    5.91
  -4 -11  -2   64.41    8.58
  -4 -11  -2   73.99    8.67
  -4 -11  -3  329.62   19.06
  -4 -11  -3  253.45   17.85
  -4 -11  -4    3.37    2.58
  -4 -11  -4   -0.42    2.27
  -4 -11  -5  554.28   25.69
  -4 -11  -5  431.19   24.27
  -4 -11  -6   10.65    3.15
  -4 -11  -6    6.43    2.64
  -4 -11  -7  101.12    9.55
  -4 -11  -7   76.01    9.29
  -4 -11  -7   81.63    8.68
  -4 -11  -8  310.92   17.49
  -4 -11  -8  276.32   17.77
  -4 -11  -8  306.72   17.16
  -4 -11  -9   58.35    6.84
  -4 -11  -9   47.31    7.32
  -4 -11  -9   49.78    6.74
  -4 -11 -10  213.96   13.72
  -4 -11 -10  180.88   13.92
  -4 -11 -11   50.93    5.75
  -4 -11 -11   42.35    5.88
  -4 -11 -12  135.65    9.91
  -4 -11 -13  105.17    7.49
  -4 -12   7   21.63    3.15
  -4 -12   6  116.17    8.55
  -4 -12   6  122.75    7.84
  -4 -12   5   64.82    6.81
  -4 -12   5   78.24    6.68
  -4 -12   4   26.90    4.73
  -4 -12   4   25.62    4.37
  -4 -12   3  341.50   19.03
  -4 -12   3  341.69   17.78
  -4 -12   2   26.49    5.21
  -4 -12   2   26.20    4.55
  -4 -12   1  334.10   19.42
  -4 -12   1  329.89   18.32
  -4 -12   0  227.82   15.65
  -4 -12   0  227.85   14.94
  -4 -12  -1   27.76    5.24
  -4 -12  -1   31.60    5.36
  -4 -12  -2  655.33   28.10
  -4 -12  -2  519.39   26.51
  -4 -12  -3   40.40    5.99
  -4 -12  -3   38.63    5.97
  -4 -12  -4  220.28   14.69
  -4 -12  -4  218.30   15.05
  -4 -12  -5  196.41   13.40
  -4 -12  -5  164.25   12.56
  -4 -12  -6  168.53   12.31
  -4 -12  -6  177.81   12.45
  -4 -12  -7  287.63   16.24
  -4 -12  -7  289.11   15.89
  -4 -12  -8   10.72    2.78
  -4 -12  -8   17.39    3.82
  -4 -12  -8   15.06    3.14
  -4 -12  -9  327.61   16.01
  -4 -12  -9  302.89   16.52
  -4 -12  -9  289.35   16.90
  -4 -12 -10   66.69    6.51
  -4 -12 -10   67.27    7.00
  -4 -12 -11  166.48    9.67
  -4 -12 -11  153.65   10.18
  -4 -12 -12   72.65    5.81
  -4 -13   5   18.78    2.75
  -4 -13   5   15.21    2.33
  -4 -13   4  148.94    9.39
  -4 -13   4  154.41    8.89
  -4 -13   3   28.56    3.95
  -4 -13   3   35.40    4.29
  -4 -13   2  235.43   13.45
  -4 -13   2  226.26   12.77
  -4 -13   1  247.93   14.19
  -4 -13   1  231.13   13.41
  -4 -13   0   91.83    8.02
  -4 -13   0   65.72    6.98
  -4 -13  -1  225.94   13.63
  -4 -13  -2   16.46    3.43
  -4 -13  -2   22.66    3.96
  -4 -13  -3  175.62   11.90
  -4 -13  -3  169.94   11.85
  -4 -13  -4  115.91    9.17
  -4 -13  -4   88.46    8.05
  -4 -13  -5  121.25    9.41
  -4 -13  -5  118.89    9.03
  -4 -13  -6  186.92   11.73
  -4 -13  -7    4.46    1.95
  -4 -13  -7    2.38    1.27
  -4 -13  -8  299.12   14.38
  -4 -13  -8  283.06   15.05
  -4 -13  -9    8.79    1.93
  -4 -13 -10   34.70    3.87
  -4 -14   2   66.83    5.14
  -4 -14   1   29.26    3.56
  -4 -14   0  181.57   10.11
  -4 -14   0  179.31   10.51
  -4 -14  -1   10.28    2.41
  -4 -14  -1    9.69    2.21
  -4 -14  -2   92.20    7.13
  -4 -14  -2   93.65    7.18
  -4 -14  -3   85.39    6.85
  -4 -14  -3   89.10    6.81
  -4 -14  -4   26.80    3.75
  -4 -14  -5  175.86   10.09
  -4 -14  -6    1.98    1.38
  -4 -14  -6    7.95    2.10
  -4 -14  -7   95.95    6.46
  -4 -14  -7   96.69    7.06
  -4 -14  -8   29.08    3.56
  -4 -14  -9   47.09    3.97
  -4 -15  -4  166.03    8.78
  -4 -15  -5   -1.23    1.04
  -4 -15  -6  103.48    6.09
   5 -13  -2   10.51    2.76
   5 -13  -1  136.72    9.27
   5 -13   0   49.55    5.18
   5 -12  -8   49.06    4.33
   5 -12  -7  165.90    9.58
   5 -12  -6   39.08    4.65
   5 -12  -6   41.16    4.94
   5 -12  -5   17.39    3.38
   5 -12  -5   12.36    3.24
   5 -12  -4  169.96   10.92
   5 -12  -4  173.09   12.51
   5 -12  -3   27.29    4.07
   5 -12  -3   27.14    5.24
   5 -12  -2  174.89   10.68
   5 -12  -2  186.73   13.88
   5 -12  -1   27.75    5.38
   5 -12   0   50.94    7.12
   5 -12   1  190.15   13.87
  -5  12  -2   16.27    3.16
   5 -12   2   17.34    3.95
  -5  12  -3  109.43    8.04
  -5  12  -4   19.68    3.01
  -5  12  -5   31.55    3.61
   5 -11  -9   37.08    4.22
   5 -11  -8   66.30    6.41
   5 -11  -8   48.99    5.60
   5 -11  -7  129.40    9.95
   5 -11  -7  123.50   10.37
   5 -11  -6    2.91    1.52
   5 -11  -6    2.65    2.56
   5 -11  -5  148.72   11.57
   5 -11  -5  151.03   13.11
   5 -11  -4    5.30    2.87
   5 -11  -4    0.07    2.07
   5 -11  -3  147.32   11.53
   5 -11  -3  127.26   12.97
   5 -11  -3  141.46   11.04
   5 -11  -2  184.30   12.90
   5 -11  -2  179.50   15.83
   5 -11  -2  177.20   12.74
   5 -11  -1   83.91    8.11
   5 -11  -1   87.86   11.09
   5 -11  -1   85.27    8.65
   5 -11   0  308.36   21.60
   5 -11   0  308.67   17.97
   5 -11   1   -1.00    2.36
   5 -11   1    0.32    1.61
   5 -11   2  321.54   21.37
   5 -11   2  327.56   17.92
   5 -11   3  100.85   10.95
   5 -11   3  106.96    9.08
  -5  11  -4  154.35   11.39
   5 -11   4  152.37   13.06
   5 -11   4  164.93   10.62
  -5  11  -5   84.03    7.67
  -5  11  -6    0.98    1.38
  -5  11  -7   88.47    6.42
   5 -10 -11  109.16    6.75
   5 -10 -10   79.62    6.68
   5 -10  -9   71.86    6.01
   5 -10  -9   76.88    7.68
   5 -10  -8  335.31   19.50
   5 -10  -7   -1.47    2.02
   5 -10  -6  142.83   13.70
   5 -10  -5  113.98   12.66
   5 -10  -4   67.44   10.25
   5 -10  -4   59.15    7.18
   5 -10  -3  158.13   13.22
   5 -10  -3  145.78   15.43
   5 -10  -3  144.52   12.06
   5 -10  -2  115.00   11.33
   5 -10  -2  104.96   13.03
   5 -10  -2  109.06   10.73
   5 -10  -1  464.10   23.81
   5 -10  -1  454.53   29.16
   5 -10  -1  456.88   24.49
   5 -10   0   83.01   11.63
   5 -10   0   94.26   10.15
   5 -10   1  138.59   15.62
   5 -10   1  151.78   13.09
   5 -10   2  236.49   20.13
   5 -10   2  229.37   15.93
   5 -10   3   28.39    6.45
   5 -10   3   37.51    5.94
   5 -10   4  268.95   20.42
   5 -10   4  277.02   16.51
  -5  10  -5    6.31    3.35
   5 -10   5    0.42    2.77
   5 -10   5    0.03    1.08
  -5  10  -6  165.20   12.25
   5 -10   6  168.14   10.26
  -5  10  -7   18.34    3.42
  -5  10  -8   17.79    3.08
  -5  10  -9   92.00    6.20
   5  -9 -11  100.04    7.03
   5  -9 -11   96.76    7.48
   5  -9 -10  142.52   10.88
   5  -9 -10  142.17    9.56
   5  -9  -9  202.57   14.89
   5  -9  -9  206.43   12.91
   5  -9  -8   -3.04    1.69
   5  -9  -8    1.57    2.02
   5  -9  -7  559.33   30.65
   5  -9  -7  562.51   25.60
   5  -9  -6  197.17   17.71
   5  -9  -5   70.81   10.60
   5  -9  -5   60.91    7.20
   5  -9  -4   98.00   12.98
   5  -9  -4   78.03    8.85
   5  -9  -3   10.58    4.95
   5  -9  -3   16.35    4.27
   5  -9  -2  600.56   35.74
   5  -9  -2  613.76   30.19
   5  -9  -1   44.74    7.07
   5  -9  -1   36.08    8.84
   5  -9  -1   39.88    6.58
   5  -9   0   98.48   13.25
   5  -9   0  100.83   11.13
   5  -9   1  179.52   18.51
   5  -9   1  184.73   15.19
   5  -9   2    2.59    3.21
   5  -9   2    1.45    2.23
   5  -9   3  415.50   28.59
   5  -9   3  423.31   23.76
   5  -9   4    9.65    5.53
   5  -9   4    0.47    1.84
   5  -9   5  136.70   15.02
   5  -9   5  131.20   11.01
  -5   9  -6  206.50   15.56
   5  -9   6  230.28   18.28
   5  -9   6  222.55   13.75
  -5   9  -7   68.15    8.09
  -5   9  -8  176.70   12.28
  -5   9  -9   15.55    3.08
  -5   9 -10   67.36    5.40
   5  -8 -12   30.32    3.82
   5  -8 -12   25.93    3.72
   5  -8 -11   21.47    3.72
   5  -8 -11   20.72    4.15
   5  -8 -10  197.41   14.71
   5  -8 -10  195.55   12.94
   5  -8  -9   17.28    4.01
   5  -8  -9   17.12    4.46
   5  -8  -8  341.91   23.15
   5  -8  -8  348.19   20.15
   5  -8  -7  114.15   13.19
   5  -8  -7  110.94   10.71
   5  -8  -6  197.99   18.25
   5  -8  -5  658.37   36.65
   5  -8  -5  625.17   29.10
   5  -8  -4   11.78    4.91
   5  -8  -4    8.63    3.23
   5  -8  -3  286.86   23.28
   5  -8  -3  272.59   18.58
   5  -8  -2  207.06   19.56
   5  -8  -2  191.72   15.47
   5  -8  -1  110.87   14.37
   5  -8   0  250.93   22.02
   5  -8   1   11.93    5.06
   5  -8   2  190.05   19.26
   5  -8   3  104.34   14.01
   5  -8   4  367.54   26.79
   5  -8   4  377.68   22.36
   5  -8   5  299.48   23.24
   5  -8   5  273.43   17.98
   5  -8   6   75.41   10.89
   5  -8   6   71.24    8.02
  -5   8  -7  184.60   14.94
  -5   8  -7  199.59   13.45
  -5   8  -8   52.27    6.25
  -5   8  -8   45.66    6.75
  -5   8  -9  180.97   12.79
  -5   8  -9  211.90   12.22
  -5   8 -10   69.42    6.48
  -5   8 -11    6.57    1.52
   5  -7 -13   66.06    5.49
   5  -7 -12   -1.05    1.07
   5  -7 -12   -1.87    1.61
   5  -7 -11  288.16   17.91
   5  -7 -11  287.77   16.40
   5  -7 -10   46.89    6.59
   5  -7 -10   50.67    7.83
   5  -7  -9  127.20   13.24
   5  -7  -9  128.83   11.79
   5  -7  -8  218.95   18.70
   5  -7  -8  236.36   16.80
   5  -7  -7   26.18    5.56
   5  -7  -7   26.02    6.56
   5  -7  -6  498.83   26.10
   5  -7  -6  478.72   30.43
   5  -7  -5   10.56    8.77
   5  -7  -5   -0.38    2.76
   5  -7  -4  236.58   40.66
   5  -7  -4  217.05   19.50
   5  -7  -4  151.59   13.01
   5  -7  -3  745.68   73.91
   5  -7  -3  733.80   39.82
   5  -7  -2  275.55   44.12
   5  -7  -2  337.25   25.21
   5  -7  -1   77.74   23.40
   5  -7  -1  124.99   15.02
   5  -7   0   -0.86    8.25
   5  -7   0   -7.37    5.77
   5  -7   1  361.13   26.39
   5  -7   1  308.85   44.84
   5  -7   2  158.81   17.08
   5  -7   2  202.48   36.24
   5  -7   3  266.94   22.70
   5  -7   3  382.16   49.99
  -5   7  -4  213.68   15.88
   5  -7   4  186.62   18.87
   5  -7   4  230.99   38.48
  -5   7  -5    7.74    3.13
   5  -7   5   14.00    6.59
  -5   7  -6  560.45   28.27
   5  -7   6  567.21   33.60
  -5   7  -7    0.14    1.85
   5  -7   7    4.06    3.39
  -5   7  -8  125.84   12.11
  -5   7  -8  118.02   10.86
  -5   7  -9   71.14    8.33
  -5   7  -9   59.78    7.19
  -5   7 -10   12.61    2.80
  -5   7 -10   13.33    3.11
  -5   7 -11  143.20    9.42
   5  -6 -14  168.38    8.64
   5  -6 -13    0.85    1.02
   5  -6 -13   -1.30    1.57
   5  -6 -12  180.19   12.18
   5  -6 -12  180.56   13.14
   5  -6 -11   56.44    7.86
   5  -6 -10  191.86   16.19
   5  -6  -9  183.86   16.89
   5  -6  -8    8.69    4.35
   5  -6  -7  212.89   40.17
   5  -6  -7  232.79   19.94
   5  -6  -6   69.21   23.48
   5  -6  -6   74.49   10.79
   5  -6  -5  500.76   61.58
   5  -6  -5  577.08   33.29
   5  -6  -4  295.87   45.92
   5  -6  -4  264.74   21.38
   5  -6  -3   96.43   26.00
   5  -6  -3   98.23   12.56
   5  -6  -2  486.90   57.63
   5  -6  -2  455.83   29.40
   5  -6  -1   -0.78   11.53
   5  -6  -1    4.13    3.24
   5  -6   0 1051.79   83.02
   5  -6   0  807.11   42.15
   5  -6   1   21.50   10.20
   5  -6   1   19.82    6.13
   5  -6   2    9.01    4.60
  -5   6  -2    4.23    3.04
   5  -6   2   13.20    5.52
  -5   6  -3  599.33   29.48
   5  -6   3  626.78   63.30
   5  -6   3  517.06   32.95
   5  -6   4   30.50   11.34
  -5   6  -4   50.48    7.94
   5  -6   4   39.67    8.72
  -5   6  -5  446.70   25.44
   5  -6   5  361.14   26.41
   5  -6   5  396.59   51.09
   5  -6   5  377.89   42.19
  -5   6  -6   46.60    7.04
   5  -6   6   45.40    8.57
  -5   6  -7   50.62    7.60
   5  -6   7   41.36    7.76
  -5   6  -8  257.42   17.94
  -5   6  -8  264.60   18.82
  -5   6  -9   97.54   10.29
  -5   6  -9   78.88    9.20
  -5   6 -10  214.88   14.67
  -5   6 -10  216.28   14.81
  -5   6 -11   10.03    2.71
  -5   6 -11   10.01    2.89
   5  -5 -14    0.31    1.02
   5  -5 -14   -0.63    1.02
   5  -5 -13  184.54   12.35
   5  -5 -12   46.99    6.74
   5  -5 -11  129.52   12.67
   5  -5 -10  214.92   18.04
   5  -5  -9    3.93    2.29
   5  -5  -8  345.25   24.57
   5  -5  -7  133.97   30.95
   5  -5  -7  114.86   13.77
   5  -5  -6  310.04   47.98
   5  -5  -6  303.29   22.84
   5  -5  -5  529.84   62.70
   5  -5  -5  575.47   32.88
   5  -5  -4    2.96    6.56
   5  -5  -4    9.34    3.41
   5  -5  -3 1243.07   95.80
   5  -5  -3 1316.25   55.35
   5  -5  -2   12.50    6.65
   5  -5  -1  253.86   39.15
   5  -5   0  296.94   42.80
   5  -5   1  439.97   50.75
   5  -5   2  619.40   60.54
   5  -5   3    1.30    7.22
   5  -5   3    6.10    6.15
  -5   5  -3    4.49    4.13
   5  -5   3    6.00    3.64
  -5   5  -4  310.86   20.39
   5  -5   4  296.66   22.85
   5  -5   4  337.56   38.47
  -5   5  -5  341.31   21.99
   5  -5   5  368.04   25.52
   5  -5   5  387.20   42.07
  -5   5  -6  248.85   18.49
   5  -5   6  269.59   21.71
   5  -5   6  289.18   36.90
  -5   5  -7  286.16   19.78
   5  -5   7  271.66   21.61
   5  -5   7  260.53   35.23
  -5   5  -8    6.11    3.05
  -5   5  -9  247.95   17.79
  -5   5  -9  252.34   18.07
   5  -5   9  280.43   18.88
  -5   5 -10   23.58    5.19
  -5   5 -10   22.14    4.74
   5  -5  10   31.07    5.75
  -5   5 -11  134.53   10.84
   5  -5  11  141.16   11.49
   5  -5  12   40.92    5.34
  -5   5 -12   51.70    6.22
   5  -5  13   19.50    3.04
   5  -4 -14  145.43    9.56
   5  -4 -13   50.43    6.55
   5  -4 -12   17.29    4.75
   5  -4 -11  684.38   34.15
   5  -4 -10    1.91    2.29
   5  -4  -9  318.65   23.19
   5  -4  -8  101.09   29.07
   5  -4  -8   68.96   10.24
   5  -4  -7  279.23   46.92
   5  -4  -7  285.24   21.87
   5  -4  -6  495.23   60.67
   5  -4  -6  509.43   30.39
   5  -4  -5   81.13   25.87
   5  -4  -5   63.88    9.75
   5  -4  -4  716.53   71.15
   5  -4  -3  207.28   37.12
   5  -4  -2 1022.80   82.12
   5  -4  -1 1416.03   96.56
   5  -4   0   79.64   20.48
   5  -4   1  716.65   64.08
   5  -4   2   -5.67    8.32
   5  -4   2    1.38    5.04
   5  -4   3  671.66   53.60
   5  -4   4  363.42   39.00
   5  -4   5   66.25   16.05
  -5   4  -5   67.42    9.18
   5  -4   5   63.93    9.61
  -5   4  -6  426.05   25.06
   5  -4   6  466.24   46.15
   5  -4   6  427.40   27.28
  -5   4  -6  414.11   22.72
  -5   4  -7    0.41    2.03
   5  -4   7    3.00    4.07
   5  -4   7   -8.47   10.94
  -5   4  -8  465.46   26.02
   5  -4   8  473.96   48.21
  -5   4  -9   60.79    8.19
   5  -4   9   70.27   10.07
  -5   4 -10  172.35   13.39
  -5   4 -10  148.53   13.58
  -5   4 -11   70.65    8.49
   5  -4  11   60.71    8.37
  -5   4 -12   32.38    5.60
   5  -4  12   20.76    4.21
   5  -4  13  133.63    9.95
   5  -4  14   14.31    2.46
   5  -3 -14  119.26    8.95
   5  -3 -13   31.85    5.28
   5  -3 -12  367.84   22.30
   5  -3 -11    4.20    3.40
   5  -3 -10  328.28   23.34
   5  -3  -9  149.68   15.42
   5  -3  -8  706.39   75.97
   5  -3  -8  789.29   39.76
   5  -3  -7  110.10   28.41
   5  -3  -7  117.48   13.36
   5  -3  -6   33.59   18.58
   5  -3  -6   16.55    4.48
   5  -3  -5 1214.85   95.39
   5  -3  -4   20.05   10.92
   5  -3  -3 1316.65   94.43
   5  -3  -2 1125.26   83.67
   5  -3  -1  104.85   24.36
   5  -3   0  767.66   65.01
   5  -3   1  183.97   30.08
   5  -3   2  682.83   60.20
   5  -3   2  598.91   48.74
   5  -3   3  754.76   55.97
   5  -3   4  441.60   42.55
   5  -3   5  710.69   55.99
   5  -3   6    0.26    3.99
  -5   3  -6   -5.41    3.72
  -5   3  -7  458.27   26.25
   5  -3   7  468.12   47.07
   5  -3   7  432.04   26.88
  -5   3  -7  435.74   24.40
   5  -3   8  570.54   53.91
  -5   3  -8  558.80   29.99
  -5   3  -8  559.93   29.04
   5  -3   9  229.29   33.28
  -5   3  -9  191.92   16.11
  -5   3  -9  185.19   15.40
  -5   3 -10  425.04   24.34
   5  -3  10  301.51   22.59
  -5   3 -11    4.40    3.39
   5  -3  11    4.07    3.48
  -5   3 -12  401.02   21.90
   5  -3  12  374.96   22.58
   5  -3  13   53.25    6.99
  -5   3 -13   64.57    7.10
   5  -3  14   27.89    4.26
   5  -2 -14   62.85    6.56
   5  -2 -13  214.26   15.00
   5  -2 -12   87.87   10.45
   5  -2 -11  402.33   25.40
   5  -2 -10  222.86   18.77
   5  -2 -10  195.11   17.04
   5  -2  -9  283.48   50.75
   5  -2  -9  165.39   15.80
   5  -2  -8  408.79   56.27
   5  -2  -8  405.34   26.09
   5  -2  -7   -3.69   15.02
   5  -2  -7    8.87    3.99
   5  -2  -6  512.01   60.63
   5  -2  -6  446.46   26.78
   5  -2  -5  182.34   34.87
   5  -2  -4   89.37   22.98
   5  -2  -3  722.92   66.98
   5  -2  -2   65.52   20.49
   5  -2  -1  536.54   53.64
   5  -2   0  731.05   61.45
   5  -2   1 1040.31   73.20
   5  -2   1  970.82   62.00
   5  -2   2  439.08   39.95
   5  -2   3   68.39   15.85
   5  -2   4 2240.40  106.89
   5  -2   5   99.78   20.03
   5  -2   6  216.25   30.11
   5  -2   7  415.77   43.05
  -5   2  -7  411.12   24.43
  -5   2  -7  424.38   23.71
   5  -2   8    6.85    4.13
  -5   2  -8    1.77    1.97
  -5   2  -8    0.50    2.69
   5  -2   9  512.77   50.84
  -5   2  -9  520.29   28.34
  -5   2  -9  490.27   27.58
  -5   2 -10   46.70    7.65
  -5   2 -10   54.80    8.06
  -5   2 -11  305.99   20.20
  -5   2 -11  309.92   20.30
  -5   2 -12   48.68    7.22
   5  -2  12   50.76    8.65
   5  -2  13  116.98   11.67
  -5   2 -13  147.43   11.57
   5  -2  14  187.25   12.79
   5  -2  15    0.27    0.86
   5  -1 -15   22.39    3.01
   5  -1 -14  202.36   12.69
   5  -1 -13   16.40    4.17
   5  -1 -12   96.69   11.03
   5  -1 -12   97.89   10.52
   5  -1 -11  342.49   22.51
   5  -1 -10   88.46   11.37
   5  -1  -9  805.66   81.39
   5  -1  -9  837.45   40.69
   5  -1  -8    1.56   10.92
   5  -1  -8    5.45    3.30
   5  -1  -7  543.25   63.18
   5  -1  -7  547.72   30.52
   5  -1  -6  167.04   34.54
   5  -1  -5   49.64   16.51
   5  -1  -4 1020.15   81.04
   5  -1  -3   -2.23    6.10
   5  -1  -2  755.80   64.45
   5  -1  -1  757.68   62.01
   5  -1   0  759.15   60.77
   5  -1   1 1626.22   91.66
   5  -1   1 1511.53   79.35
   5  -1   2   28.59   10.61
   5  -1   3  942.63   60.21
   5  -1   4   84.99   17.23
   5  -1   5  508.25   44.80
   5  -1   6  449.50   42.89
   5  -1   7    9.25    6.80
  -5   1  -7    9.72    3.71
   5  -1   8  308.31   37.27
  -5   1  -8  338.10   21.53
  -5   1  -8  311.80   20.65
   5  -1   9   24.54   13.41
  -5   1  -9   15.51    4.64
  -5   1  -9   20.67    4.74
   5  -1  10   46.83   15.15
  -5   1 -10   70.43    9.48
  -5   1 -10   63.60    9.11
  -5   1 -11  121.17   12.17
  -5   1 -11  133.47   12.77
  -5   1 -12   34.52    6.24
  -5   1 -12   38.15    6.74
   5  -1  13  204.69   16.49
  -5   1 -13  233.79   15.24
   5  -1  14   21.74    5.05
   5  -1  15   97.36    8.02
   5   0 -15   52.41    4.71
   5   0 -14   13.49    2.96
   5   0 -13  146.07   12.23
   5   0 -13  137.61   11.13
   5   0 -12  169.41   14.20
   5   0 -11   19.08    5.19
   5   0 -10  350.58   23.77
   5   0  -9  181.61   37.03
   5   0  -9  185.42   16.66
   5   0  -8   57.35   21.33
   5   0  -8   67.43    9.53
   5   0  -7  460.53   57.52
   5   0  -7  439.78   26.85
   5   0  -6   45.90   17.96
   5   0  -5 1532.45  103.78
   5   0  -4    3.33    5.47
   5   0  -3  815.56   67.62
   5   0  -2  441.36   47.13
   5   0  -1  191.82   29.65
   5   0  -1  220.67   20.82
   5   0   0 1200.31   58.54
   5   0   0 1169.59   74.83
   5   0   1   34.26   12.23
   5   0   1   24.38    9.09
   5   0   2  992.41   59.49
   5   0   3  482.97   39.98
   5   0   4 1871.48   90.80
   5   0   5 1093.80   67.14
   5   0   6   35.30   11.64
   5   0   7  521.50   47.12
   5   0   8    0.22    7.38
  -5   0  -8    7.10    2.51
   5   0   9  242.11   33.33
  -5   0  -9  223.64   17.01
  -5   0  -9  218.47   17.33
   5   0  10  312.24   40.00
  -5   0 -10  364.72   22.46
  -5   0 -10  356.52   22.90
  -5   0 -11    1.92    2.69
  -5   0 -11   -0.27    2.65
  -5   0 -12  160.92   13.57
  -5   0 -12  157.75   13.93
  -5   0 -13   25.55    4.88
  -5   0 -13   30.68    6.09
   5   0  14  104.68   10.63
   5   0  15   40.53    5.72
   5   0  16   25.07    3.24
   5   1 -14   34.58    4.83
   5   1 -13   99.55    9.39
   5   1 -12   22.90    5.08
   5   1 -11  337.18   22.42
   5   1 -10  109.69   12.49
   5   1  -9   -9.05   16.10
   5   1  -9   10.58    4.15
   5   1  -8  233.87   41.78
   5   1  -8  258.85   20.01
   5   1  -7   73.96   21.30
   5   1  -7   79.04   10.59
   5   1  -6  496.00   56.98
   5   1  -5  336.55   43.81
   5   1  -4 1192.64   84.71
   5   1  -3  157.50   28.11
   5   1  -3  193.16   22.49
   5   1  -2   36.94   14.27
   5   1  -2   28.76    8.63
   5   1  -1  658.14   42.41
   5   1  -1  567.62   50.18
   5   1   0   36.07   11.75
   5   1   0   63.71   12.42
   5   1   1  775.02   55.37
   5   1   1  742.02   48.53
   5   1   2  247.02   26.22
   5   1   3 1188.43   65.00
   5   1   4  659.01   47.21
   5   1   5    8.70    6.56
   5   1   6  273.90   31.35
   5   1   7  138.22   23.13
   5   1   8  580.56   51.41
  -5  -1  -8  625.88   30.21
  -5  -1  -8  594.13   27.57
   5   1   9  269.86   36.12
  -5  -1  -9  289.79   19.22
  -5  -1  -9  270.53   16.85
   5   1  10   83.98   20.68
  -5  -1 -10   97.87   10.83
  -5  -1 -11  281.15   18.70
  -5  -1 -11  271.42   19.41
  -5  -1 -12  116.59   11.19
  -5  -1 -12  155.73   13.63
  -5  -1 -13   31.11    5.16
  -5  -1 -13   38.38    6.26
  -5  -1 -14   46.86    6.40
   5   1  15   12.33    3.22
   5   1  16   96.11    6.98
   5   2 -14  132.31    9.31
   5   2 -14  119.80    8.43
   5   2 -13    9.29    3.12
   5   2 -12  157.46   13.38
   5   2 -11   57.83    8.77
   5   2 -10   42.60    7.46
   5   2  -9  377.17   52.63
   5   2  -9  474.62   28.21
   5   2  -8   90.32   24.49
   5   2  -8   93.37   11.54
   5   2  -7  670.99   67.98
   5   2  -7  766.00   37.24
   5   2  -6  265.62   40.11
   5   2  -6  294.87   20.52
   5   2  -5  694.50   53.46
   5   2  -5  565.17   57.57
   5   2  -4  486.57   42.41
   5   2  -4  387.24   45.00
   5   2  -3   13.98   10.40
   5   2  -3    8.15    7.31
   5   2  -2  477.41   38.94
   5   2  -2  400.10   41.73
   5   2  -1    6.45    5.85
   5   2  -1    8.18    6.69
   5   2   0  120.68   20.80
   5   2   0  138.91   20.55
   5   2   1  543.93   43.68
   5   2   2  249.20   28.57
   5   2   2  223.01   24.39
   5   2   3   58.57   12.62
   5   2   4   57.52   12.41
   5   2   5  771.07   51.77
   5   2   6  161.46   23.23
   5   2   7  156.32   23.92
   5   2   8  791.97   59.54
  -5  -2  -8  822.19   34.86
  -5  -2  -8  863.92   37.95
   5   2   9   14.42    9.72
  -5  -2  -9   11.68    3.72
  -5  -2  -9   12.00    3.93
   5   2  10  400.12   43.26
  -5  -2 -10  334.08   21.30
  -5  -2 -11   73.99    8.17
  -5  -2 -11   49.40    7.11
  -5  -2 -11   63.48    8.92
  -5  -2 -12   50.88    7.05
  -5  -2 -12   48.89    7.63
  -5  -2 -13  170.31   13.67
  -5  -2 -14    2.30    1.52
   5   2  15  169.35   12.29
   5   2  16   -1.23    1.35
   5   3 -14   12.31    2.41
   5   3 -14   16.66    2.92
   5   3 -13  131.60   10.30
   5   3 -12  169.09   13.53
   5   3 -11  171.16   14.84
   5   3 -10  275.05   20.20
  -5  -3   9    2.87    3.08
   5   3  -9    1.17    3.77
   5   3  -8  234.03   39.34
  -5  -3   8  186.18   14.64
   5   3  -8  202.67   17.47
   5   3  -7  466.27   53.74
  -5  -3   7  392.38   22.64
   5   3  -7  400.76   25.41
   5   3  -6  190.14   32.75
   5   3  -6  242.15   34.61
   5   3  -5  511.22   49.76
   5   3  -5  678.92   60.70
   5   3  -4    2.98    6.02
   5   3  -4  -10.44    8.98
   5   3  -3 1364.97   79.80
   5   3  -3 1382.64   82.94
   5   3  -2   13.77    8.76
   5   3  -2   15.26    7.47
   5   3  -1 1439.49   78.40
   5   3  -1 1332.99   76.47
   5   3   0  326.20   34.07
   5   3   0  322.56   32.60
   5   3   1  423.64   39.53
   5   3   1  384.84   34.90
   5   3   2 1350.40   70.44
   5   3   2 1264.08   63.37
  -5  -3  -3  423.52   30.36
   5   3   3  397.13   32.42
  -5  -3  -4  662.53   39.58
   5   3   4  602.23   42.44
   5   3   5  527.59   40.62
   5   3   6   72.59   15.48
   5   3   7 1547.15   82.92
   5   3   8   31.18   10.24
  -5  -3  -8   27.71    5.14
  -5  -3  -8   30.52    5.78
   5   3   9  225.74   30.41
  -5  -3  -9  224.71   15.91
   5   3  10  285.54   35.67
  -5  -3 -10  321.13   19.53
  -5  -3 -11  197.01   14.40
  -5  -3 -12  216.91   14.49
  -5  -3 -12  202.44   16.23
  -5  -3 -13    0.53    1.80
  -5  -3 -14  231.50   14.74
   5   3  15   44.68    6.06
  -5  -3 -15   46.15    5.33
   5   3  16   44.70    4.73
   5   4 -14   62.07    5.11
   5   4 -14   52.69    4.64
   5   4 -13  138.42    9.97
   5   4 -12   70.81    8.16
  -5  -4  11  144.57   10.92
   5   4 -11  127.80   12.46
  -5  -4  10   20.74    4.40
   5   4 -10   16.56    5.03
  -5  -4   9  483.26   25.69
   5   4  -9  507.32   29.03
  -5  -4   8   83.86   10.00
  -5  -4   7   25.51    5.63
   5   4  -6  477.82   52.90
  -5  -4   6  584.10   29.37
   5   4  -5   -2.79    9.29
   5   4  -4  829.78   65.62
   5   4  -3  201.51   29.63
   5   4  -2   57.93   16.51
   5   4  -1 2049.67  105.00
   5   4   0  103.52   19.97
   5   4   1 1981.41  101.52
   5   4   2  182.12   27.78
   5   4   3  237.72   23.00
  -5  -4  -4  777.30   47.76
   5   4   4  710.02   44.78
   5   4   5   86.89   14.47
  -5  -4  -5  124.84   17.51
   5   4   6  449.73   37.53
   5   4   7  344.58   34.10
  -5  -4  -7  299.68   18.54
  -5  -4  -7  291.00   19.34
  -5  -4  -7  310.16   19.16
  -5  -4  -8  620.51   29.78
   5   4   8  668.91   51.12
  -5  -4  -8  617.94   30.28
  -5  -4  -8  638.74   31.49
   5   4   9  549.77   48.28
  -5  -4  -9  559.07   28.06
  -5  -4  -9  547.84   29.29
   5   4  10  298.34   35.65
  -5  -4 -10  287.15   18.66
  -5  -4 -11  254.59   17.14
  -5  -4 -12   30.30    5.53
  -5  -4 -13  183.23   12.32
  -5  -4 -13  177.16   13.77
  -5  -4 -14  123.24   10.02
  -5  -4 -15   26.30    3.76
   5   4  16   95.74    6.87
   5   5 -13    1.95    1.45
  -5  -5  12  224.69   12.10
   5   5 -12  244.00   15.00
  -5  -5  11   17.47    3.77
   5   5 -11   17.92    4.37
  -5  -5  10  286.13   17.77
   5   5 -10  323.78   20.90
  -5  -5   9  119.61   11.59
   5   5  -9  135.85   13.66
  -5  -5   8   10.09    3.67
   5   5  -7 1286.38   94.73
  -5  -5   7 1272.81   50.85
   5   5  -6   95.12   24.35
  -5  -5   6   76.25    9.62
   5   5  -5   49.88   17.57
  -5  -5   5   52.86    7.98
   5   5  -4  919.75   73.46
  -5  -5   4  943.64   40.31
   5   5  -3  341.57   41.75
   5   5  -2  823.67   65.83
   5   5  -1   31.06   12.73
   5   5   0  663.24   56.38
   5   5   1  562.75   51.55
   5   5   2 1587.43   93.63
   5   5   3  408.32   44.85
  -5  -5  -4   11.64    7.21
  -5  -5  -5  559.52   43.36
  -5  -5  -6  591.05   45.14
  -5  -5  -7  326.56   19.78
  -5  -5  -7  294.48   19.13
  -5  -5  -7  308.59   19.53
  -5  -5  -7  326.51   20.60
  -5  -5  -8  381.51   22.36
  -5  -5  -8  380.43   22.52
  -5  -5  -8  380.46   23.20
  -5  -5  -9   11.71    3.25
  -5  -5  -9   19.91    4.84
  -5  -5  -9   11.48    3.98
  -5  -5 -10  824.42   36.84
  -5  -5 -10  858.63   38.69
  -5  -5 -11   16.85    4.80
  -5  -5 -12  253.57   16.50
  -5  -5 -13  344.11   18.35
  -5  -5 -13  360.04   20.04
  -5  -5 -14   45.51    5.76
  -5  -5 -15  281.30   13.52
   5   6 -13  106.58    6.99
  -5  -6  12   45.10    4.61
   5   6 -12   56.31    6.14
  -5  -6  11   42.55    5.40
   5   6 -11   40.81    6.07
  -5  -6  10  219.80   14.79
   5   6 -10  232.08   16.62
  -5  -6   9   69.37    8.47
   5   6  -9   57.32    8.56
  -5  -6   8   71.56    9.16
  -5  -6   7   61.82    8.64
   5   6  -6  260.56   41.83
  -5  -6   6  247.98   18.40
   5   6  -5  713.57   68.32
  -5  -6   5  669.04   33.16
   5   6  -4  352.41   46.52
  -5  -6   4  413.79   24.31
   5   6  -3  450.09   52.05
  -5  -6   3  471.28   25.84
   5   6  -2  271.44   38.75
   5   6  -1 1830.10  108.17
   5   6   0    3.46    4.53
   5   6   1   24.77   12.40
   5   6   2 1069.07   77.32
   5   6   3   50.89   16.32
   5   6   4  886.25   71.31
  -5  -6  -4  957.33   62.10
  -5  -6  -5  250.15   30.22
   5   6   5  182.82   31.18
  -5  -6  -6  364.92   21.23
  -5  -6  -6  376.78   37.32
  -5  -6  -6  338.05   20.46
  -5  -6  -6  346.39   20.88
  -5  -6  -6  340.65   21.19
  -5  -6  -7  259.05   17.96
  -5  -6  -7  294.61   33.28
  -5  -6  -7  255.60   17.71
  -5  -6  -7  259.49   18.45
  -5  -6  -7  276.36   18.98
  -5  -6  -8   51.13    7.70
  -5  -6  -8   50.08    7.58
  -5  -6  -8   41.78    7.28
  -5  -6  -9  826.63   37.29
  -5  -6  -9  818.54   37.29
  -5  -6  -9  840.20   38.14
  -5  -6 -10   55.60    8.11
  -5  -6 -10   63.37    8.91
  -5  -6 -10   50.84    7.88
  -5  -6 -11  373.58   21.91
  -5  -6 -12  493.78   24.85
  -5  -6 -13  112.14    9.67
  -5  -6 -13  120.17   10.18
  -5  -6 -14  193.56   11.87
  -5  -6 -15    6.23    2.08
  -5  -6 -15   11.30    2.09
  -5  -7  12   44.51    3.96
   5   7 -12   47.56    4.87
  -5  -7  11  120.32    8.61
   5   7 -11  128.01    9.87
  -5  -7  11  108.41    7.76
  -5  -7  10    1.52    1.79
   5   7 -10    0.36    2.27
  -5  -7  10    1.11    1.19
  -5  -7   9   74.97    8.56
   5   7  -9   69.99    8.79
  -5  -7   8  126.19   12.04
  -5  -7   7  632.71   31.74
  -5  -7   6  150.38   14.06
   5   7  -5   -1.89    7.36
  -5  -7   5    1.37    2.20
  -5  -7   4  472.62   26.50
  -5  -7   4  457.45   24.97
   5   7  -3  119.74   27.93
  -5  -7   3  128.77   12.65
  -5  -7   3  112.71   11.10
   5   7  -2  136.29   28.90
  -5  -7   2  157.55   14.01
  -5  -7   2  145.74   12.74
   5   7  -1  381.31   47.27
  -5  -7   1  395.06   23.35
  -5  -7   1  391.32   22.11
   5   7   0   12.51    9.88
  -5  -7   0    3.56    2.45
  -5  -7   0    3.19    1.27
   5   7   1 1782.53  110.51
  -5  -7  -1 1933.49   68.13
   5   7   2  266.84   38.51
  -5  -7  -2  263.48   18.21
   5   7   3  336.26   43.37
  -5  -7  -3  355.48   21.72
  -5  -7  -3  327.94   19.74
  -5  -7  -4  484.23   25.18
   5   7   4  546.55   56.11
  -5  -7  -4  539.20   47.74
  -5  -7  -4  499.05   27.09
  -5  -7  -4  503.13   25.74
  -5  -7  -5  197.12   28.25
   5   7   5  176.67   32.11
  -5  -7  -5  200.29   15.11
  -5  -7  -5  210.57   15.64
  -5  -7  -5  200.92   15.60
  -5  -7  -6  182.15   27.19
   5   7   6  173.52   31.24
  -5  -7  -6  190.37   14.89
  -5  -7  -6  177.99   14.41
  -5  -7  -6  176.60   14.81
  -5  -7  -7   93.56   10.77
  -5  -7  -7  114.67   21.44
   5   7   7  104.42   26.14
  -5  -7  -7  124.15   13.36
  -5  -7  -7   98.81   10.99
  -5  -7  -7   86.92   10.06
  -5  -7  -8  722.50   31.46
  -5  -7  -8  711.23   34.12
   5   7   8  697.90   66.56
  -5  -7  -8  723.77   34.02
  -5  -7  -8  734.16   34.82
  -5  -7  -9   92.42   10.54
  -5  -7  -9   90.03   10.54
  -5  -7  -9   83.61    9.96
  -5  -7 -10  461.42   25.84
  -5  -7 -10  486.29   26.25
  -5  -7 -10  504.71   26.58
  -5  -7 -11  161.93   13.62
  -5  -7 -12   33.41    5.53
  -5  -7 -13   52.70    6.32
  -5  -7 -13   55.34    6.34
  -5  -7 -14   -0.60    1.42
  -5  -7 -14   -0.21    1.06
  -5  -7 -15  145.35    9.18
  -5  -8  11    0.18    0.86
   5   8 -11    1.48    1.33
  -5  -8  10  210.62   12.45
   5   8 -10  194.78   12.77
  -5  -8  10  195.46   10.75
  -5  -8   9   81.81    8.43
  -5  -8   9   86.71    7.67
   5   8  -9   78.45    8.56
  -5  -8   8   79.16    8.88
  -5  -8   8   55.64    6.72
  -5  -8   7  338.63   20.71
  -5  -8   7  268.69   17.26
  -5  -8   6   26.26    5.82
  -5  -8   6   19.26    4.07
  -5  -8   5  273.45   19.29
  -5  -8   5  216.29   15.90
  -5  -8   4    2.79    2.37
  -5  -8   4    4.13    2.76
   5   8  -3    5.58    7.32
  -5  -8   3    8.37    3.37
  -5  -8   3    9.69    3.78
  -5  -8   2  263.15   19.09
  -5  -8   2  269.97   17.81
   5   8  -1   73.70   22.52
  -5  -8   1   56.59    8.36
  -5  -8   1   60.36    8.00
   5   8   0  655.68   65.48
  -5  -8   0  713.13   34.59
  -5  -8   0  721.82   32.51
   5   8   1   43.78   16.93
  -5  -8  -1   59.27    8.44
  -5  -8  -1   72.25    8.78
   5   8   2  571.30   60.10
  -5  -8  -2  588.04   30.64
  -5  -8  -2  627.75   29.45
   5   8   3  388.16   48.60
  -5  -8  -3  371.87   22.93
  -5  -8  -3  374.55   21.64
  -5  -8  -4  112.29   10.99
   5   8   4  106.75   25.02
  -5  -8  -4  129.93   24.77
  -5  -8  -4  116.71   12.07
  -5  -8  -4  107.55   10.87
   5   8   5  502.64   56.02
  -5  -8  -5  559.97   50.91
  -5  -8  -5  499.25   26.53
  -5  -8  -5  513.85   26.85
  -5  -8  -5  517.06   27.59
  -5  -8  -6  131.94   24.16
   5   8   6  112.17   25.85
  -5  -8  -6  135.15   11.13
  -5  -8  -6  127.56   12.42
  -5  -8  -6  125.44   12.06
  -5  -8  -6  136.54   12.91
  -5  -8  -7  349.66   19.57
  -5  -8  -7  337.17   21.32
   5   8   7  299.56   42.81
  -5  -8  -7  362.92   40.42
  -5  -8  -7  327.37   20.89
  -5  -8  -7  325.19   21.16
  -5  -8  -7  342.67   21.11
  -5  -8  -8    3.28    2.89
  -5  -8  -8    1.47    1.37
  -5  -8  -8   -2.75    3.07
  -5  -8  -8    1.15    2.30
  -5  -8  -9   81.74    9.94
  -5  -8  -9   91.48   10.43
  -5  -8  -9   91.64   10.26
  -5  -8 -10  131.20   12.33
  -5  -8 -10  126.42   12.11
  -5  -8 -10  130.78   12.00
  -5  -8 -11    3.78    2.05
  -5  -8 -11    4.79    2.25
  -5  -8 -12  166.32   12.45
  -5  -8 -13    7.68    2.25
  -5  -8 -14  151.96   10.50
  -5  -8 -15  124.98    7.75
  -5  -9  10   55.32    5.19
   5   9 -10   50.41    5.08
  -5  -9   9   64.92    6.62
   5   9  -9   60.28    6.50
  -5  -9   8  125.87   10.54
   5   9  -8   98.60    9.23
  -5  -9   7   10.96    4.42
  -5  -9   7    5.50    2.00
  -5  -9   6  303.17   19.88
  -5  -9   6  328.75   18.29
  -5  -9   5   72.67    9.48
  -5  -9   5   51.17    6.85
  -5  -9   4  250.64   18.24
  -5  -9   4  185.17   14.09
  -5  -9   3  187.13   15.86
  -5  -9   3  146.35   12.59
   5   9  -2  160.32   33.76
  -5  -9   2  181.47   15.46
  -5  -9   2  137.22   12.25
   5   9  -1  224.10   38.76
  -5  -9   1  246.83   17.98
  -5  -9   1  176.12   14.10
   5   9   0  152.27   32.07
  -5  -9   0  157.20   14.21
  -5  -9   0  122.71   11.49
   5   9   1  259.05   41.88
  -5  -9  -1  289.14   20.01
  -5  -9  -1  287.72   18.30
   5   9   2  165.01   31.70
  -5  -9  -2  186.10   15.61
  -5  -9  -2  186.99   14.37
   5   9   3   80.07   23.07
  -5  -9  -3   48.78   16.21
  -5  -9  -3   42.49    7.34
  -5  -9  -3   48.19    7.13
  -5  -9  -4  990.85   37.60
   5   9   4  895.64   77.55
  -5  -9  -4  998.93   72.50
  -5  -9  -4 1024.96   42.12
  -5  -9  -4  956.77   39.12
   5   9   5   26.15   12.78
  -5  -9  -5   25.40    4.70
  -5  -9  -5   17.76    9.45
  -5  -9  -5   16.53    4.22
  -5  -9  -5   16.12    4.56
  -5  -9  -5   16.09    4.27
   5   9   6  295.18   43.19
  -5  -9  -6  355.58   41.49
  -5  -9  -6  366.41   20.08
  -5  -9  -6  363.52   21.95
  -5  -9  -6  362.45   22.30
  -5  -9  -6  328.31   20.72
  -5  -9  -7  197.05   15.78
  -5  -9  -7  219.40   14.80
  -5  -9  -7  207.15   15.99
  -5  -9  -8   21.46    4.95
  -5  -9  -8   21.61    4.72
  -5  -9  -8   24.57    5.43
  -5  -9  -8   29.04    5.45
  -5  -9  -9  216.69   16.09
  -5  -9  -9  209.86   15.91
  -5  -9  -9  222.34   15.85
  -5  -9 -10   -1.40    2.23
  -5  -9 -10    0.40    2.09
  -5  -9 -10    3.48    2.59
  -5  -9 -11  166.79   12.84
  -5  -9 -11  164.82   12.77
  -5  -9 -12  145.78   12.18
  -5  -9 -13  103.32    9.00
  -5  -9 -14  188.76   10.93
  -5 -10   9   99.31    7.24
   5  10  -9   94.36    6.62
  -5 -10   8   24.55    4.15
   5  10  -8   19.63    3.55
  -5 -10   7  233.08   14.81
   5  10  -7  223.99   13.50
  -5 -10   6  122.28   11.29
  -5 -10   5   92.32   10.12
  -5 -10   4  382.76   22.91
  -5 -10   3   21.34    5.21
  -5 -10   3   18.19    3.45
  -5 -10   2  192.43   15.82
  -5 -10   2  189.57   13.78
  -5 -10   1  101.94    9.55
  -5 -10   1   89.82   10.50
  -5 -10   0  339.39   18.74
  -5 -10   0  307.59   20.51
  -5 -10  -1  450.84   22.52
  -5 -10  -1  445.62   25.28
  -5 -10  -2   16.52    3.51
  -5 -10  -2   21.79    5.76
  -5 -10  -2   12.50    3.38
  -5 -10  -3  394.81   20.66
  -5 -10  -3  405.04   23.45
  -5 -10  -4   16.05    3.91
  -5 -10  -4   21.07    5.50
  -5 -10  -4   15.33    3.98
  -5 -10  -5  169.51   13.98
  -5 -10  -5  231.85   14.99
  -5 -10  -5  242.34   16.98
  -5 -10  -5  194.30   14.80
  -5 -10  -6  487.83   23.49
  -5 -10  -6  501.72   25.81
  -5 -10  -7  106.41   10.72
  -5 -10  -7   99.91    9.47
  -5 -10  -7   72.15    9.55
  -5 -10  -7   99.71   10.44
  -5 -10  -8  249.77   17.04
  -5 -10  -8  239.28   15.18
  -5 -10  -8  257.33   17.42
  -5 -10  -8  242.95   17.93
  -5 -10  -8  245.38   16.58
  -5 -10  -9   43.67    6.42
  -5 -10  -9   50.09    8.05
  -5 -10  -9   40.39    6.49
  -5 -10  -9   45.28    6.28
  -5 -10 -10  285.71   17.12
  -5 -10 -10  309.36   17.69
  -5 -10 -10  293.89   18.63
  -5 -10 -11   86.15    8.28
  -5 -10 -11   81.44    8.85
  -5 -10 -12   39.96    5.66
  -5 -10 -13   56.25    5.78
  -5 -10 -14    2.76    1.22
  -5 -11   8  108.39    7.32
  -5 -11   7  128.13    9.17
  -5 -11   6   19.51    4.00
  -5 -11   5  300.77   17.58
  -5 -11   4   18.65    4.15
  -5 -11   3  175.46   14.01
  -5 -11   3  167.67   11.71
  -5 -11   2  188.37   15.02
  -5 -11   2  189.80   12.84
  -5 -11   1  178.86   14.67
  -5 -11   1  188.94   13.12
  -5 -11   0  352.46   21.61
  -5 -11   0  342.33   18.92
  -5 -11  -1    5.69    3.51
  -5 -11  -1    2.45    1.75
  -5 -11  -2  214.15   14.50
  -5 -11  -2  217.32   16.42
  -5 -11  -3  120.94   10.52
  -5 -11  -3  128.21   12.17
  -5 -11  -3  130.77   11.04
  -5 -11  -4  139.90   11.31
  -5 -11  -4  144.50   12.83
  -5 -11  -4  136.02   11.39
  -5 -11  -5  218.01   14.36
  -5 -11  -5  223.50   16.01
  -5 -11  -6   67.46    7.40
  -5 -11  -6   76.07    8.31
  -5 -11  -6   72.13    8.52
  -5 -11  -7  539.49   24.20
  -5 -11  -7  558.51   26.81
  -5 -11  -7  554.81   26.74
  -5 -11  -7  568.82   26.24
  -5 -11  -8   21.26    4.10
  -5 -11  -8   14.76    3.52
  -5 -11  -8   25.27    4.85
  -5 -11  -8   22.18    4.35
  -5 -11  -9  224.35   14.31
  -5 -11  -9  207.41   14.48
  -5 -11 -10   35.22    5.50
  -5 -11 -10   40.43    5.50
  -5 -11 -11    4.83    1.70
  -5 -11 -12  281.65   14.39
  -5 -11 -13    3.12    1.25
  -5 -12   7   11.24    2.15
  -5 -12   6  168.14    9.97
  -5 -12   5   29.92    4.35
  -5 -12   4  249.18   14.70
  -5 -12   3  194.73   13.48
  -5 -12   2   77.21    8.41
  -5 -12   2   90.47    7.64
  -5 -12   1  210.98   14.94
  -5 -12   1  237.19   13.67
  -5 -12   0    2.72    2.64
  -5 -12   0   -0.32    1.18
  -5 -12  -1  280.16   15.74
  -5 -12  -1  265.30   17.19
  -5 -12  -2   90.69    8.35
  -5 -12  -2   95.03    9.54
  -5 -12  -3   86.20    8.04
  -5 -12  -3   80.02    8.83
  -5 -12  -4  278.08   15.86
  -5 -12  -4  289.85   17.59
  -5 -12  -5   -0.39    1.91
  -5 -12  -5    3.35    2.02
  -5 -12  -6  552.90   23.92
  -5 -12  -6  554.22   25.26
  -5 -12  -7   59.55    6.20
  -5 -12  -7   52.24    6.56
  -5 -12  -7   56.14    6.53
  -5 -12  -8   99.61    7.92
  -5 -12  -8  104.08    9.13
  -5 -12  -8   93.19    7.93
  -5 -12  -9  127.88    9.45
  -5 -12  -9  103.15    8.64
  -5 -12 -10    5.55    1.92
  -5 -12 -10    8.30    2.22
  -5 -12 -11  162.82    9.55
  -5 -13   5  167.02    8.73
  -5 -13   4   76.66    6.20
  -5 -13   3    7.07    2.05
  -5 -13   2  301.02   15.47
  -5 -13   1    3.36    1.61
  -5 -13   1    4.61    1.78
  -5 -13   0  192.96   11.05
  -5 -13   0  188.36   12.27
  -5 -13  -1   86.80    7.27
  -5 -13  -2   43.08    5.06
  -5 -13  -2   33.68    5.11
  -5 -13  -3  155.66   10.14
  -5 -13  -3  149.13   10.93
  -5 -13  -4    6.57    1.99
  -5 -13  -4    1.78    1.48
  -5 -13  -5   81.84    7.03
  -5 -13  -5   83.10    7.35
  -5 -13  -6   98.80    7.55
  -5 -13  -6  103.34    8.65
  -5 -13  -6  107.66    8.17
  -5 -13  -7   38.55    4.35
  -5 -13  -7   53.84    6.13
  -5 -13  -7   45.56    4.69
  -5 -13  -8  258.54   13.48
  -5 -13  -9    6.36    1.77
  -5 -13 -10   96.09    6.29
  -5 -14   2   16.57    2.52
  -5 -14   1   72.85    5.87
  -5 -14   0  110.42    7.72
  -5 -14  -1   33.99    4.17
  -5 -14  -2   63.66    5.07
  -5 -14  -2   71.15    6.03
  -5 -14  -3   13.95    2.18
  -5 -14  -3   15.72    2.77
  -5 -14  -4  102.40    6.56
  -5 -14  -4   92.29    6.69
  -5 -14  -5   65.40    5.05
  -5 -14  -5   62.78    5.72
  -5 -14  -5   58.47    4.89
  -5 -14  -6   33.00    3.29
  -5 -14  -6   37.48    4.31
  -5 -14  -7  215.32   10.81
  -5 -14  -8    5.56    1.41
   6 -12  -5   41.62    4.62
   6 -12  -4  164.40   10.56
   6 -12  -3   82.54    7.66
   6 -12  -2  112.63    9.25
   6 -12  -1   -3.24    2.06
   6 -12   0  128.52   10.00
  -6  12  -1   69.48    5.81
   6 -12   1   75.38    7.26
  -6  12  -2  104.69    7.05
   6 -12   2  111.89    8.60
  -6  12  -3   41.03    3.96
   6 -11  -8   69.05    5.40
   6 -11  -7   38.76    4.44
   6 -11  -7   34.10    4.54
   6 -11  -6  200.12   11.47
   6 -11  -6  190.55   12.71
   6 -11  -5   42.72    5.12
   6 -11  -5   40.95    5.89
   6 -11  -4    7.83    2.12
   6 -11  -4    4.52    3.03
   6 -11  -3  151.92   10.03
   6 -11  -3  129.52   11.99
   6 -11  -2   -1.90    2.30
   6 -11  -2    1.67    1.59
   6 -11  -1  231.06   16.91
   6 -11  -1  244.67   14.11
   6 -11   0   60.86    8.23
   6 -11   0   62.68    6.62
   6 -11   1   59.11    7.98
   6 -11   1   58.37    6.38
   6 -11   2  255.10   17.18
   6 -11   2  287.49   14.90
   6 -11   3    4.16    2.62
   6 -11   3    2.48    1.20
  -6  11  -4  184.63   11.27
  -6  11  -5   25.11    3.63
  -6  11  -6   54.28    4.69
   6 -10  -9  253.46   12.33
   6 -10  -9  211.58   11.91
   6 -10  -8   66.19    6.46
   6 -10  -8   63.25    6.93
   6 -10  -7   52.40    6.86
   6 -10  -6   43.63    6.79
   6 -10  -5    9.65    3.27
   6 -10  -5   14.30    4.39
   6 -10  -4  291.08   17.00
   6 -10  -4  283.08   19.96
   6 -10  -4  273.28   15.28
   6 -10  -3    9.39    3.30
   6 -10  -3    8.11    3.96
   6 -10  -3    8.06    3.06
   6 -10  -2  183.07   13.02
   6 -10  -2  164.37   15.49
   6 -10  -2  163.81   12.36
   6 -10  -1  242.49   19.16
   6 -10  -1  243.34   15.72
   6 -10   0   35.75    7.48
   6 -10   0   36.17    5.80
   6 -10   1  198.44   17.29
   6 -10   1  218.91   14.87
   6 -10   2   32.57    6.62
   6 -10   2   36.43    5.76
   6 -10   3  118.49   12.19
   6 -10   3  113.53    9.92
   6 -10   4  158.81   13.81
   6 -10   4  162.77   11.13
  -6  10  -5   21.23    4.36
   6 -10   5   25.30    5.22
   6 -10   5   18.85    3.56
  -6  10  -6  141.70   10.00
   6 -10   6  142.85    8.33
  -6  10  -7   -0.66    1.13
  -6  10  -8   91.15    6.06
   6  -9 -11    0.25    0.86
   6  -9 -10  218.89   12.48
   6  -9  -9   81.63    8.18
   6  -9  -8   62.77    8.07
   6  -9  -7  294.81   19.79
   6  -9  -6   25.03    6.35
   6  -9  -5  126.09   13.65
   6  -9  -4   63.42    9.72
   6  -9  -4   48.75    6.34
   6  -9  -3  163.34   16.44
   6  -9  -3  154.71   12.42
   6  -9  -2  325.48   19.44
   6  -9  -2  316.50   23.86
   6  -9  -2  322.90   19.55
   6  -9  -1   17.06    5.36
   6  -9  -1    9.95    3.50
   6  -9   0  249.99   21.12
   6  -9   0  256.86   17.58
   6  -9   1   49.86    9.36
   6  -9   1   44.03    6.99
   6  -9   2  160.42   16.22
   6  -9   2  177.22   14.11
   6  -9   3  100.13   12.46
   6  -9   3  117.80   11.07
   6  -9   4   24.19    5.84
   6  -9   4   38.38    5.78
   6  -9   5  229.67   17.67
   6  -9   5  216.75   13.81
  -6   9  -6    5.03    2.20
   6  -9   6    8.78    2.54
  -6   9  -7  178.10   12.13
  -6   9  -8   65.66    6.36
  -6   9  -9   29.17    3.42
   6  -8 -11   95.33    7.72
   6  -8 -10   50.21    6.48
   6  -8 -10   49.71    5.04
   6  -8  -9  115.90   11.16
   6  -8  -8  384.94   23.37
   6  -8  -7   20.17    5.08
   6  -8  -6  241.86   19.83
   6  -8  -5  138.05   14.88
   6  -8  -4  123.52   14.47
   6  -8  -4   96.06    9.69
   6  -8  -3  119.63   14.43
   6  -8  -3  104.66   10.55
   6  -8  -2    4.65    3.06
   6  -8  -2    9.58    3.66
   6  -8  -1  508.71   32.40
   6  -8   0   31.74    7.96
   6  -8   1  114.18   14.49
   6  -8   2  298.84   23.98
   6  -8   3   56.74   10.19
   6  -8   4  397.96   26.99
   6  -8   5    2.80    2.60
   6  -8   5    7.26    2.82
  -6   8  -6  197.42   13.02
   6  -8   6  184.14   16.14
   6  -8   6  176.23   12.59
  -6   8  -7  171.74   13.35
  -6   8  -7  193.94   12.24
   6  -8   7  181.73   11.41
  -6   8  -8   37.55    4.73
  -6   8  -8   35.35    5.40
  -6   8  -9  114.38    8.64
  -6   8  -9  111.31    7.67
  -6   8 -10    3.95    1.40
   6  -7 -12  102.56    7.65
   6  -7 -12   92.85    6.22
   6  -7 -11   88.81    8.33
   6  -7 -11   83.96    6.83
   6  -7 -10    8.52    2.74
   6  -7 -10    7.17    2.77
   6  -7  -9  263.26   18.62
   6  -7  -9  251.57   15.11
   6  -7  -8    5.43    2.24
   6  -7  -8    6.29    4.21
   6  -7  -7  223.43   18.78
   6  -7  -6  254.60   20.79
   6  -7  -5   53.38    9.47
   6  -7  -4  272.94   21.91
   6  -7  -4  185.02   14.33
   6  -7  -3   20.00   14.76
   6  -7  -3   -0.72    2.77
   6  -7  -2  565.88   66.25
   6  -7  -2  648.50   37.05
   6  -7  -1  146.96   32.32
   6  -7  -1  108.10   14.11
   6  -7   0   64.51   22.99
   6  -7   0   60.35   10.40
   6  -7   1  181.90   36.27
   6  -7   1  207.03   19.71
   6  -7   2   77.92   24.87
   6  -7   2   44.11    9.34
  -6   7  -3  139.71   12.23
   6  -7   3  127.60   15.28
  -6   7  -4   74.35    8.75
   6  -7   4   55.25   10.25
  -6   7  -5  296.30   18.79
   6  -7   5  262.60   21.47
  -6   7  -6  125.64   11.46
   6  -7   6  115.83   13.28
  -6   7  -7   44.62    6.55
   6  -7   7   44.97    8.15
   6  -7   7   36.95    5.44
  -6   7  -8  175.14   13.49
  -6   7  -8  186.05   13.09
  -6   7  -9   12.38    3.29
  -6   7  -9   10.93    3.07
  -6   7 -10  106.52    8.14
  -6   7 -10  105.04    8.00
   6  -6 -12   97.38    8.31
   6  -6 -12   91.38    7.05
   6  -6 -11    2.74    1.73
   6  -6 -11    0.82    1.76
   6  -6 -10  329.42   18.22
   6  -6 -10  354.64   21.60
   6  -6  -9   34.26    6.98
   6  -6  -8  135.37   14.24
   6  -6  -7  142.89   15.34
   6  -6  -6   73.43   11.07
   6  -6  -5  280.46   47.01
   6  -6  -5  274.86   22.10
   6  -6  -4   31.00   18.70
   6  -6  -4    6.54    4.39
   6  -6  -3  170.48   17.43
   6  -6  -3  200.89   38.70
   6  -6  -2  302.78   23.45
   6  -6  -2  255.94   42.84
   6  -6  -1  309.74   23.67
   6  -6  -1  335.26   49.28
  -6   6   0  202.99   15.18
   6  -6   0  197.13   37.99
   6  -6   0  157.66   17.11
   6  -6   1    1.77    9.44
  -6   6  -1    6.88    3.80
   6  -6   1   12.36    6.75
  -6   6  -2  226.49   16.64
   6  -6   2  194.60   18.87
   6  -6   2  226.37   39.70
  -6   6  -3  135.48   12.88
   6  -6   3  133.30   15.20
   6  -6   3  157.39   32.86
  -6   6  -4  423.46   24.35
   6  -6   4  406.14   28.04
   6  -6   4  453.41   55.65
  -6   6  -5   74.68    9.34
   6  -6   5   86.34   11.74
  -6   6  -6   10.46    3.23
   6  -6   6   14.81    5.28
  -6   6  -7  365.90   22.15
   6  -6   7  404.74   25.65
  -6   6  -8    0.35    2.08
  -6   6  -8    1.33    2.14
  -6   6  -9  170.40   12.87
  -6   6  -9  161.40   12.69
  -6   6 -10  133.39   10.30
  -6   6 -10  143.55   10.88
  -6   6 -11   30.60    3.84
  -6   6 -11   26.53    3.93
   6  -5 -13  111.44    8.11
   6  -5 -13   98.29    6.95
   6  -5 -12    9.67    2.82
   6  -5 -11  247.35   16.98
   6  -5 -10   60.27    8.85
   6  -5  -9  140.65   14.43
   6  -5  -8  178.53   16.82
   6  -5  -7   28.09    6.43
   6  -5  -6  566.95   33.35
   6  -5  -6  566.73   67.85
   6  -5  -5  127.64   14.69
   6  -5  -5  132.44   31.75
   6  -5  -4  431.70   27.97
   6  -5  -4  413.50   56.42
  -6   5   3   94.48   10.22
   6  -5  -3  109.72   13.47
   6  -5  -3   88.50   25.07
  -6   5   2  216.15   15.94
   6  -5  -2  226.50   19.47
   6  -5  -2  194.83   37.93
  -6   5   1  576.03   28.66
   6  -5  -1  563.53   63.40
   6  -5  -1  573.65   33.16
   6  -5   0   55.47   18.83
  -6   5   0   65.87    8.51
   6  -5   0   52.63    9.44
  -6   5  -1  569.12   28.87
   6  -5   1  532.20   32.21
  -6   5  -2  199.64   15.95
   6  -5   2  199.10   18.34
   6  -5   2  253.87   39.90
  -6   5  -3  149.40   13.59
   6  -5   3  137.61   15.12
   6  -5   3  143.12   30.89
  -6   5  -4  832.35   38.60
   6  -5   4  872.02   43.36
  -6   5  -5   16.47    4.36
   6  -5   5   13.65    4.59
   6  -5   5   26.90   12.80
   6  -5   5   14.66    7.98
  -6   5  -6  215.52   16.98
   6  -5   6  237.71   19.51
   6  -5   6  228.73   34.10
  -6   5  -7    1.17    2.41
   6  -5   7    3.24    3.16
  -6   5  -8   82.64   10.11
  -6   5  -9  146.99   12.58
  -6   5  -9  176.33   14.23
  -6   5 -10   63.94    7.26
  -6   5 -10   68.18    8.13
  -6   5 -11   70.80    7.50
  -6   5 -12    3.88    1.31
   6  -4 -13   -0.26    1.38
   6  -4 -12  136.02   11.40
   6  -4 -11  123.21   12.16
   6  -4 -10  224.52   17.98
   6  -4  -9  211.93   18.13
   6  -4  -8   24.79    6.68
   6  -4  -7  529.26   31.42
   6  -4  -7  499.23   64.47
   6  -4  -6  119.67   13.68
   6  -4  -6   97.15   28.13
   6  -4  -5  482.37   29.62
   6  -4  -5  491.78   62.26
  -6   4   4  570.71   29.22
   6  -4  -4  639.47   69.73
   6  -4  -4  618.00   34.00
   6  -4  -3   32.54   17.99
  -6   4   3   26.66    5.47
   6  -4  -3   22.31    6.24
   6  -4  -2 1015.27   85.79
   6  -4  -2  892.36   42.81
   6  -4  -1   -4.00    7.88
   6  -4  -1    6.85    3.97
   6  -4   0  488.54   56.70
   6  -4   1  369.30   48.76
   6  -4   2   11.46    7.75
  -6   4  -2    1.37    2.00
   6  -4   2   12.43    4.79
  -6   4  -3  674.08   32.83
   6  -4   3  772.93   71.13
   6  -4   3  707.12   58.20
   6  -4   3  637.11   34.96
   6  -4   4   16.40   14.43
   6  -4   4   25.49   12.26
  -6   4  -4   18.49    5.58
   6  -4   4   13.57    5.76
  -6   4  -5  301.84   20.34
   6  -4   5  277.34   21.58
   6  -4   5  283.32   36.98
  -6   4  -6  283.49   20.16
   6  -4   6  324.34   22.84
   6  -4   6  269.90   36.03
  -6   4  -7  138.37   13.45
   6  -4   7  145.20   14.32
   6  -4   7  131.36   26.03
  -6   4  -8  163.15   14.83
  -6   4  -9   -0.92    2.03
  -6   4  -9   -0.34    2.52
  -6   4 -10  234.81   16.64
   6  -4  10  209.60   15.55
  -6   4 -11   54.22    6.97
   6  -4  11   33.76    5.43
  -6   4 -12   64.62    7.02
   6  -4  12   54.84    6.16
   6  -4  13   35.31    4.04
   6  -3 -14    2.71    1.43
   6  -3 -13   89.83    8.20
   6  -3 -12   44.61    6.70
   6  -3 -11   31.00    6.12
   6  -3 -10  427.04   26.14
   6  -3  -9   10.66    4.18
   6  -3  -8  422.77   27.45
   6  -3  -7   26.77   15.74
   6  -3  -7    3.45    2.68
   6  -3  -6  261.10   44.95
   6  -3  -6  268.81   21.07
   6  -3  -5  590.95   67.03
   6  -3  -5  542.05   31.30
   6  -3  -4   20.04    6.53
   6  -3  -4   44.66    7.85
   6  -3  -3  536.84   62.16
   6  -3  -2  232.72   40.57
   6  -3  -1  656.81   66.25
   6  -3   0  479.31   54.40
   6  -3   1   93.45   24.39
   6  -3   2  626.10   61.83
   6  -3   3   11.63   10.57
   6  -3   3   21.24    9.42
   6  -3   4  240.90   33.30
  -6   3  -4  222.43   17.00
   6  -3   5  458.62   46.32
  -6   3  -5  433.79   25.35
   6  -3   6  224.01   32.80
  -6   3  -6  231.84   17.68
   6  -3   7  283.81   37.78
  -6   3  -7  334.74   21.87
  -6   3  -7  317.23   19.63
  -6   3  -8  116.29   12.55
  -6   3  -8   98.19   10.49
  -6   3  -9  474.48   25.92
  -6   3  -9  420.08   23.20
  -6   3 -10  285.34   18.95
   6  -3  10  192.18   16.20
  -6   3 -11  103.78   10.34
   6  -3  11   67.68    8.73
  -6   3 -12  320.05   17.95
   6  -3  12  291.20   17.77
  -6   3 -13    0.87    1.38
   6  -3  13    0.16    1.50
   6  -3  14  117.52    7.41
   6  -2 -14   30.67    3.84
   6  -2 -13   95.30    8.64
   6  -2 -12   27.91    5.40
   6  -2 -11  253.36   18.36
   6  -2 -10    0.16    2.32
   6  -2  -9  270.90   21.12
   6  -2  -8  308.13   50.87
   6  -2  -8  358.29   24.58
   6  -2  -7  186.88   38.94
   6  -2  -7  133.90   14.49
   6  -2  -6  593.82   68.49
   6  -2  -6  578.61   32.60
   6  -2  -5  -19.12   12.44
   6  -2  -5    0.55    2.34
   6  -2  -4 1266.46   98.89
   6  -2  -3  208.00   37.65
   6  -2  -2  525.48   58.41
   6  -2  -1  704.81   66.75
   6  -2   0   -5.50    8.65
   6  -2   1  730.86   65.55
   6  -2   2  117.57   26.12
   6  -2   2  111.48   21.17
   6  -2   3  294.08   35.14
   6  -2   4  533.48   49.18
   6  -2   5  418.01   43.85
  -6   2  -5  379.88   23.18
   6  -2   6  608.64   54.76
  -6   2  -6  623.54   31.81
  -6   2  -6  651.21   30.14
   6  -2   7  159.44   27.73
  -6   2  -7  167.91   14.97
  -6   2  -7  169.35   14.12
   6  -2   8  208.64   32.35
  -6   2  -8  162.51   14.93
  -6   2  -8  176.16   14.88
  -6   2  -9   57.87    8.87
  -6   2  -9   65.04    8.54
  -6   2 -10   36.36    6.88
  -6   2 -10   40.42    6.83
  -6   2 -11  423.16   23.60
   6  -2  11  386.19   24.15
  -6   2 -11  420.60   23.01
  -6   2 -12    0.76    2.17
   6  -2  12    3.17    2.62
   6  -2  13  169.75   12.65
  -6   2 -13  193.84   12.53
   6  -2  14   66.11    6.39
   6  -1 -14  176.08   10.24
   6  -1 -13   23.09    4.27
   6  -1 -12  125.39   11.60
   6  -1 -11  166.47   14.58
   6  -1 -10  377.17   24.63
   6  -1 -10  360.25   23.57
   6  -1  -9  333.21   23.40
   6  -1  -9  309.55   22.35
   6  -1  -8   11.26   12.05
   6  -1  -8   17.09    4.64
   6  -1  -7  368.06   53.81
   6  -1  -7  413.70   26.44
   6  -1  -6   88.42   25.22
   6  -1  -6   99.59   12.04
   6  -1  -6   88.13   11.51
   6  -1  -5  605.60   66.82
   6  -1  -5  561.97   31.07
   6  -1  -5  582.06   31.71
   6  -1  -4  168.11   32.18
   6  -1  -3  192.64   34.98
   6  -1  -2  682.28   65.48
   6  -1  -1   16.71   11.99
   6  -1   0  572.18   57.30
   6  -1   1  249.70   36.08
   6  -1   2 1164.07   81.39
   6  -1   2 1008.77   67.37
   6  -1   3  315.10   35.76
   6  -1   4    9.45    7.26
   6  -1   5  783.25   60.13
   6  -1   6  362.49   40.78
  -6   1  -6  394.83   23.57
   6  -1   7   81.91   19.20
  -6   1  -7  103.29   11.18
  -6   1  -7   90.33    9.98
   6  -1   8   61.06   16.28
  -6   1  -8   91.01   10.76
  -6   1  -8   84.55    9.88
   6  -1   9   25.05   19.92
  -6   1  -9   25.81    5.99
  -6   1  -9   20.10    5.04
  -6   1 -10  119.19   12.22
  -6   1 -10  123.91   12.32
  -6   1 -11   75.13    9.60
  -6   1 -11   71.42    9.02
  -6   1 -12  136.58   11.79
  -6   1 -12  126.49   11.52
  -6   1 -13  119.38    9.81
   6  -1  13   97.42   10.12
   6  -1  14   28.38    4.73
   6  -1  15   79.12    6.15
   6   0 -14    0.95    0.88
   6   0 -13  266.42   15.59
   6   0 -12  101.90   10.44
   6   0 -11  136.52   13.07
   6   0 -11  114.23   11.85
   6   0 -10  181.82   16.21
   6   0  -9    9.45    4.30
   6   0  -8  301.76   47.88
   6   0  -8  276.10   21.15
   6   0  -7  104.77   26.06
   6   0  -7   96.04   11.91
   6   0  -6  164.42   34.18
   6   0  -6  204.94   17.48
   6   0  -5  419.10   53.26
   6   0  -5  403.65   25.27
   6   0  -4  251.56   40.01
   6   0  -3  647.53   64.10
   6   0  -2    1.59    9.87
   6   0  -1  429.52   48.48
   6   0   0  883.01   69.92
   6   0   1  461.12   48.46
   6   0   2  899.72   68.11
   6   0   2  735.48   54.52
   6   0   3   -0.11    4.73
   6   0   4 1142.48   71.70
   6   0   5   96.67   20.24
   6   0   6  209.67   30.02
  -6   0  -6  212.23   16.08
   6   0   7  247.01   33.66
  -6   0  -7  274.65   16.91
  -6   0  -7  261.47   18.64
   6   0   8    3.23    5.83
  -6   0  -8    1.11    2.34
  -6   0  -8    3.02    1.50
   6   0   9  681.64   59.49
  -6   0  -9  729.37   34.50
  -6   0  -9  700.77   34.54
  -6   0 -10    6.58    3.30
  -6   0 -10    4.24    2.94
  -6   0 -11  135.99   12.53
  -6   0 -11  128.46   12.51
  -6   0 -12  115.72   10.81
  -6   0 -12  101.12   10.67
  -6   0 -13   74.26    7.70
  -6   0 -13   81.05    8.44
   6   0  14  140.92   11.30
   6   0  15    3.60    1.38
   6   1 -14  148.20    8.98
   6   1 -13   36.85    5.05
   6   1 -12   57.03    7.58
   6   1 -12   60.57    7.58
   6   1 -11  367.35   22.65
   6   1 -10   63.85    9.39
   6   1  -9  272.87   20.83
   6   1  -8    9.23    7.87
   6   1  -8    9.47    4.07
   6   1  -7  273.40   44.84
   6   1  -7  267.40   20.82
   6   1  -6  528.79   61.55
   6   1  -6  543.94   30.63
   6   1  -5   18.81   11.79
   6   1  -5   25.70    5.66
   6   1  -4  932.22   78.40
   6   1  -3   17.12   10.80
   6   1  -2  446.76   49.71
   6   1  -1   28.82   12.31
   6   1  -1   37.36    8.40
   6   1   0   28.64   11.52
   6   1   0   32.28    9.49
   6   1   1  243.43   27.93
   6   1   1  281.33   35.16
   6   1   2  118.74   22.51
   6   1   2  103.72   18.94
   6   1   3 1084.83   66.87
   6   1   4  258.13   31.36
   6   1   5  289.26   33.54
   6   1   6  765.84   58.31
   6   1   7   94.05   18.77
  -6  -1  -7  101.78    9.81
  -6  -1  -7   89.64   10.21
   6   1   8  606.14   53.73
  -6  -1  -8  584.71   29.54
  -6  -1  -8  552.18   26.99
   6   1   9  215.69   32.18
  -6  -1  -9  220.81   16.73
  -6  -1  -9  222.41   15.25
  -6  -1 -10   71.21    9.04
  -6  -1 -10   67.41    7.66
  -6  -1 -10   60.59    9.02
  -6  -1 -11  258.24   17.65
  -6  -1 -11  298.88   19.80
  -6  -1 -12   21.26    4.37
  -6  -1 -12   31.61    6.65
  -6  -1 -13  100.17    9.05
  -6  -1 -13  132.65   11.07
   6   1  14    4.30    2.27
  -6  -1 -14   12.68    3.14
   6   1  15   88.64    7.65
   6   2 -14   60.35    5.07
   6   2 -13   94.79    8.09
   6   2 -12  176.52   13.28
   6   2 -11    4.15    3.11
   6   2 -10  168.78   15.55
   6   2  -9  295.35   21.66
   6   2  -8  199.53   38.84
   6   2  -8  221.75   18.62
   6   2  -7  282.38   44.16
   6   2  -7  210.99   18.32
   6   2  -6   -2.86   11.28
   6   2  -6   -1.58    3.09
   6   2  -5  463.45   54.01
   6   2  -5  450.98   26.78
   6   2  -4  103.56   23.39
   6   2  -3  399.49   47.11
   6   2  -2  190.27   30.11
   6   2  -2  170.23   23.50
   6   2  -1   70.15   18.41
   6   2  -1   53.76   13.76
   6   2   0  529.62   44.19
   6   2   0  668.70   55.62
   6   2   1   16.65    9.66
   6   2   1    3.53    6.30
   6   2   2  659.19   53.87
   6   2   3  277.38   34.35
   6   2   3  262.41   29.73
   6   2   4   84.67   16.62
   6   2   5 1228.99   72.66
   6   2   6   -1.61    3.95
   6   2   7  106.44   21.48
  -6  -2  -7  111.63   10.53
  -6  -2  -7  104.93   10.69
  -6  -2  -7  106.04   11.07
   6   2   8  459.82   45.72
  -6  -2  -8  486.81   25.79
  -6  -2  -8  465.50   24.42
   6   2   9  652.94   56.42
  -6  -2  -9  719.71   30.78
  -6  -2 -10  124.80   11.91
  -6  -2 -10  177.56   13.24
  -6  -2 -11    4.74    2.60
  -6  -2 -11   -4.26    3.15
  -6  -2 -11   -3.40    3.78
  -6  -2 -12  197.73   13.77
  -6  -2 -12  220.33   16.44
  -6  -2 -13   44.00    6.66
  -6  -2 -14  106.52    9.13
   6   2  15   74.67    7.22
   6   3 -13  154.02   10.00
   6   3 -13  141.49    9.71
   6   3 -12    0.05    1.83
   6   3 -11  188.95   14.90
   6   3 -10   84.86   10.65
   6   3  -9   68.69   10.06
   6   3  -8  308.24   22.17
   6   3  -7   23.41    5.78
   6   3  -6  574.02   31.45
   6   3  -5  152.88   30.06
   6   3  -5  164.59   15.09
   6   3  -4  259.84   33.92
   6   3  -4  292.69   39.72
   6   3  -3 1488.31   89.07
   6   3  -3 1949.69  105.81
   6   3  -2   56.91   15.77
   6   3  -2   35.08   12.59
   6   3  -1  730.98   55.98
   6   3  -1  774.02   59.91
   6   3   0  430.11   41.53
   6   3   0  395.07   40.57
   6   3   1  831.24   60.75
   6   3   1  808.02   58.88
   6   3   2  783.22   59.94
   6   3   2  837.49   58.44
   6   3   3  416.40   40.80
   6   3   3  414.18   36.02
   6   3   4  728.18   50.86
   6   3   5   71.10   15.89
   6   3   6 1004.28   64.95
  -6  -3  -6 1047.63   41.19
  -6  -3  -6 1007.68   42.12
   6   3   7  465.94   44.05
  -6  -3  -7  533.82   26.37
  -6  -3  -7  493.93   27.07
  -6  -3  -7  526.66   26.43
   6   3   8  296.74   35.64
  -6  -3  -8  328.21   20.00
  -6  -3  -8  332.92   21.46
   6   3   9  326.02   38.30
  -6  -3  -9  365.00   21.23
  -6  -3 -10   23.04    4.79
  -6  -3 -11  680.31   30.57
  -6  -3 -12   73.69    7.94
  -6  -3 -12   76.84    9.23
  -6  -3 -13   40.17    6.24
  -6  -3 -14  199.92   12.83
   6   3  15   20.50    3.87
  -6  -3 -15   20.23    3.13
   6   4 -13   14.64    2.54
  -6  -4  13   11.58    2.28
   6   4 -13   15.37    2.83
   6   4 -12  170.74   11.93
   6   4 -11  183.09   13.94
   6   4 -10   87.32   10.37
   6   4  -9  417.15   25.61
  -6  -4   8    2.25    1.52
   6   4  -8    4.59    3.87
  -6  -4   7  273.88   17.96
   6   4  -7  261.49   20.02
  -6  -4   6  564.90   28.00
   6   4  -6  534.61   30.23
  -6  -4   5  259.92   17.61
   6   4  -5  246.63   18.74
  -6  -4   4  875.01   37.32
   6   4  -4  896.11   39.64
   6   4  -3   12.29    3.05
   6   4  -2  727.05   59.43
   6   4  -1  239.71   32.59
   6   4   0 1544.82   90.59
   6   4   1  289.45   36.43
   6   4   2  131.25   24.32
   6   4   3 1518.76   93.17
   6   4   4   12.04    5.94
   6   4   5  641.42   47.07
   6   4   6  505.10   42.31
  -6  -4  -6  516.10   25.57
  -6  -4  -6  469.63   25.14
  -6  -4  -6  481.47   26.13
  -6  -4  -7    7.17    2.86
   6   4   7    6.40    5.94
  -6  -4  -7   -2.09    2.18
  -6  -4  -7    6.02    3.66
  -6  -4  -7    1.93    3.00
   6   4   8  675.62   53.47
  -6  -4  -8  677.02   31.71
  -6  -4  -8  662.47   32.95
  -6  -4  -9    7.33    3.42
  -6  -4  -9    4.51    3.19
  -6  -4 -10  277.87   18.32
  -6  -4 -11  231.88   16.04
  -6  -4 -12   34.58    5.61
  -6  -4 -13  242.34   14.00
  -6  -4 -13  234.43   15.67
  -6  -4 -14   30.31    4.86
  -6  -4 -15  138.18    8.72
  -6  -5  12   64.80    5.82
   6   5 -12   76.62    7.01
   6   5 -11   49.76    6.61
  -6  -5  10  150.36   10.81
   6   5 -10  147.80   13.12
  -6  -5   9  186.39   13.42
   6   5  -9  170.50   14.90
  -6  -5   8  296.42   18.54
   6   5  -8  290.32   20.71
  -6  -5   7  177.06   14.38
   6   5  -7  184.66   16.16
  -6  -5   6  207.64   15.95
   6   5  -6  223.73   17.93
   6   5  -5  386.25   48.80
  -6  -5   5  419.64   23.83
   6   5  -5  412.11   25.02
   6   5  -4   14.40    6.90
  -6  -5   4   15.85    4.32
   6   5  -4   16.57    4.79
   6   5  -3  840.98   69.51
  -6  -5   3  757.77   34.81
   6   5  -2   14.37   11.18
  -6  -5   2    5.57    2.78
   6   5  -1   82.46   20.09
   6   5   0 1697.48  100.76
   6   5   1   -6.04    8.58
   6   5   2  937.54   72.11
   6   5   3   -0.52   10.00
   6   5   4  179.54   31.53
  -6  -5  -5  919.31   37.93
  -6  -5  -5  892.05   38.03
  -6  -5  -5  898.60   38.96
  -6  -5  -6   40.73    6.47
  -6  -5  -6   46.64    6.74
  -6  -5  -6   45.67    7.06
  -6  -5  -6   38.02    6.44
  -6  -5  -7  344.27   21.12
  -6  -5  -7  354.66   21.12
  -6  -5  -7  350.42   22.39
  -6  -5  -7  372.41   22.07
  -6  -5  -8   46.23    7.01
  -6  -5  -8   36.41    6.43
  -6  -5  -8   39.36    7.11
  -6  -5  -9  614.96   30.38
  -6  -5  -9  633.06   31.75
  -6  -5 -10  253.11   17.57
  -6  -5 -11  194.28   14.70
  -6  -5 -12  216.85   14.65
  -6  -5 -13   16.97    3.51
  -6  -5 -13   17.12    3.87
  -6  -5 -14  112.10    7.77
  -6  -5 -14  113.34    8.80
  -6  -5 -15   41.32    4.26
   6   6 -12    2.05    1.44
  -6  -6  12    0.33    0.79
  -6  -6  11  174.11    9.76
  -6  -6  11  172.37   10.50
   6   6 -11  184.56   12.14
  -6  -6  10   -0.18    1.38
   6   6 -10    2.29    1.80
  -6  -6   9  147.86   11.75
   6   6  -9  157.83   13.54
  -6  -6   8  121.94   11.23
   6   6  -8  109.03   11.86
  -6  -6   7   22.96    5.19
   6   6  -7   22.22    5.64
  -6  -6   6  623.97   30.93
   6   6  -6  604.10   31.66
   6   6  -5   -2.29    7.84
  -6  -6   5    6.20    2.99
   6   6  -5    3.42    1.62
   6   6  -4  150.40   30.26
  -6  -6   4  138.45   13.17
   6   6  -4  139.94   13.01
   6   6  -3  514.80   56.54
  -6  -6   3  501.00   27.44
  -6  -6   3  524.58   27.21
   6   6  -2  107.14   25.44
  -6  -6   2   91.04   10.59
  -6  -6   2   90.15   10.11
   6   6  -1 1239.81   88.31
  -6  -6   1 1240.77   49.83
  -6  -6   1 1294.30   49.24
   6   6   0   84.84   21.16
  -6  -6   0   80.32    9.76
  -6  -6   0   97.16   10.04
   6   6   1  335.68   43.46
  -6  -6  -1  329.59   21.08
  -6  -6  -1  357.62   20.66
   6   6   2  591.07   58.51
  -6  -6  -2  638.93   31.42
  -6  -6  -2  657.38   30.36
   6   6   3  911.46   74.62
  -6  -6  -3  930.01   40.70
  -6  -6  -3  956.82   39.44
   6   6   4  228.51   36.56
  -6  -6  -4  262.88   30.71
  -6  -6  -4  263.00   17.19
  -6  -6  -4  254.15   17.37
  -6  -6  -4  253.63   17.88
  -6  -6  -5   22.36    5.11
   6   6   5   21.92   11.95
  -6  -6  -5   22.36    4.67
  -6  -6  -5   21.22    5.45
  -6  -6  -5   22.44    4.93
  -6  -6  -6 1127.98   45.44
   6   6   6 1171.44   88.36
  -6  -6  -6 1080.00   44.16
  -6  -6  -6 1146.61   45.60
  -6  -6  -6 1135.17   46.67
  -6  -6  -7   57.27    8.06
  -6  -6  -7   61.37    8.19
  -6  -6  -7   55.60    8.69
  -6  -6  -7   53.21    7.66
  -6  -6  -8  761.07   35.26
  -6  -6  -8  755.58   34.71
  -6  -6  -8  774.88   36.28
  -6  -6  -9   95.08   10.65
  -6  -6  -9   88.27   10.13
  -6  -6  -9   94.53   10.96
  -6  -6 -10   96.86   10.71
  -6  -6 -10   97.01   10.73
  -6  -6 -11  322.35   19.71
  -6  -6 -12   12.02    3.56
  -6  -6 -13  124.28    9.65
  -6  -6 -13  126.78   10.29
  -6  -6 -14   90.23    7.32
  -6  -6 -15   19.57    3.06
  -6  -6 -15   16.91    2.49
  -6  -7  11   11.78    2.03
   6   7 -11   11.88    2.75
  -6  -7  11   11.62    2.22
  -6  -7  10   52.91    5.54
  -6  -7  10   59.79    5.88
   6   7 -10   57.00    6.58
  -6  -7   9  176.04   12.26
   6   7  -9  168.70   13.09
  -6  -7   9  173.05   12.03
  -6  -7   8   41.58    6.14
  -6  -7   8   45.13    6.51
   6   7  -8   43.08    6.90
  -6  -7   7  106.23   10.90
   6   7  -7   94.57   10.54
  -6  -7   7   97.81   10.19
  -6  -7   6  101.10   11.04
  -6  -7   6  106.90   10.98
   6   7  -6   89.58   10.48
  -6  -7   5  297.51   20.22
  -6  -7   5  304.17   19.85
   6   7  -5  323.61   20.82
   6   7  -4  277.22   43.43
  -6  -7   4  330.77   21.47
  -6  -7   4  327.73   20.71
   6   7  -3   95.57   24.40
  -6  -7   3   95.74   10.95
  -6  -7   3   94.78   10.37
  -6  -7   2  224.17   17.34
  -6  -7   2  224.58   16.43
   6   7  -1   84.12   23.63
  -6  -7   1   66.95    8.86
  -6  -7   1   65.84    8.53
   6   7   0  368.06   47.96
  -6  -7   0  450.40   25.57
  -6  -7   0  438.96   24.05
   6   7   1  323.63   44.29
  -6  -7  -1  373.91   22.92
  -6  -7  -1  368.92   21.67
   6   7   2  145.79   29.40
  -6  -7  -2  131.77   12.84
  -6  -7  -2  107.51   10.90
  -6  -7  -3  193.77   14.22
   6   7   3  162.51   30.58
  -6  -7  -3  182.23   15.57
  -6  -7  -3  186.20   14.73
  -6  -7  -4    8.61    6.02
   6   7   4    9.98    8.88
  -6  -7  -4   11.80    3.47
  -6  -7  -4   13.25    3.44
  -6  -7  -4    7.93    3.28
   6   7   5  482.01   55.19
  -6  -7  -5  519.30   46.83
  -6  -7  -5  521.09   26.94
  -6  -7  -5  506.44   26.98
  -6  -7  -5  506.37   27.54
  -6  -7  -6    9.78    2.50
   6   7   6   17.28    9.21
  -6  -7  -6   18.29    4.64
  -6  -7  -6   15.65    4.32
  -6  -7  -6   13.13    3.60
  -6  -7  -7   69.11    8.98
   6   7   7   64.02   18.97
  -6  -7  -7   64.72    8.39
  -6  -7  -7   74.69    9.89
  -6  -7  -7   70.77    9.18
  -6  -7  -8  205.98   16.19
  -6  -7  -8  211.48   15.89
  -6  -7  -8  213.16   16.66
  -6  -7  -9   39.41    7.00
  -6  -7  -9   48.99    7.42
  -6  -7  -9   58.49    8.57
  -6  -7 -10  161.10   13.61
  -6  -7 -10  167.91   13.85
  -6  -7 -10  166.82   14.19
  -6  -7 -11   12.85    4.12
  -6  -7 -12  112.65    9.95
  -6  -7 -13  107.53    8.78
  -6  -7 -13  136.86   10.05
  -6  -7 -14    5.85    1.75
  -6  -7 -15   80.60    5.94
  -6  -8  10   72.34    5.94
  -6  -8  10   73.98    5.62
   6   8 -10   69.82    6.44
  -6  -8   9    3.26    1.31
  -6  -8   9    1.92    0.86
  -6  -8   8  108.02    9.84
   6   8  -8  111.10   10.04
  -6  -8   8  117.31    9.52
  -6  -8   7  163.53   13.21
   6   8  -7  144.64   12.27
  -6  -8   7  151.62   11.87
  -6  -8   6  386.18   22.75
   6   8  -6  395.86   22.38
  -6  -8   6  401.95   21.86
  -6  -8   5   83.89   10.25
  -6  -8   5   95.67   10.08
  -6  -8   4   19.91    5.81
  -6  -8   4   27.79    5.67
  -6  -8   3  341.64   22.12
  -6  -8   3  357.46   21.31
   6   8  -2    4.23    3.82
  -6  -8   2    6.79    3.47
  -6  -8   2    3.38    2.60
  -6  -8   1   70.93    9.87
  -6  -8   1   81.86    9.58
   6   8   0   31.73   14.91
  -6  -8   0   50.01    7.80
  -6  -8   0   52.53    7.70
   6   8   1  121.11   27.82
  -6  -8  -1  126.85   12.90
  -6  -8  -1  134.17   12.42
   6   8   2  758.00   71.28
  -6  -8  -2  817.66   37.91
  -6  -8  -2  819.77   36.21
   6   8   3   13.92    8.03
  -6  -8  -3    1.69    6.42
  -6  -8  -3   18.37    4.41
  -6  -8  -3   10.87    3.59
   6   8   4   63.53   19.98
  -6  -8  -4   53.75   14.94
  -6  -8  -4   38.07    6.21
  -6  -8  -4   58.72    8.53
  -6  -8  -4   49.76    7.87
  -6  -8  -5   13.64    6.62
   6   8   5   27.57   14.04
  -6  -8  -5   32.14    5.80
  -6  -8  -5   17.95    4.71
  -6  -8  -5   14.16    4.09
  -6  -8  -6    1.19    2.10
   6   8   6   12.35   12.86
  -6  -8  -6    7.41    3.52
  -6  -8  -6    2.19    2.19
  -6  -8  -6    0.65    1.92
  -6  -8  -7  223.02   16.87
  -6  -8  -7  226.45   16.67
  -6  -8  -7  247.43   17.84
  -6  -8  -7  246.52   17.46
  -6  -8  -8    5.99    2.99
  -6  -8  -8    5.38    3.26
  -6  -8  -8    4.66    2.79
  -6  -8  -9  161.48   13.79
  -6  -8  -9  155.39   13.11
  -6  -8  -9  154.88   13.60
  -6  -8 -10  189.44   14.74
  -6  -8 -10  195.37   14.70
  -6  -8 -10  202.06   15.03
  -6  -8 -11  264.78   16.81
  -6  -8 -12   79.96    7.82
  -6  -8 -13    5.31    1.79
  -6  -8 -13    5.18    2.16
  -6  -8 -14  120.37    8.39
  -6  -8 -14  104.54    6.51
  -6  -9   9  183.07   10.41
   6   9  -9  157.71    9.69
  -6  -9   8   26.90    4.49
   6   9  -8   20.92    3.70
  -6  -9   8   23.82    3.53
  -6  -9   7   58.74    7.15
   6   9  -7   56.44    6.66
  -6  -9   7   58.31    6.34
  -6  -9   6  201.05   14.93
  -6  -9   6  216.24   13.95
  -6  -9   5    3.35    2.70
  -6  -9   5    5.90    2.02
  -6  -9   4  297.41   19.90
  -6  -9   4  301.35   18.30
  -6  -9   3   64.40    8.86
  -6  -9   3   54.68    7.31
  -6  -9   2  272.72   19.21
  -6  -9   2  216.07   15.80
  -6  -9   1  169.19   14.98
  -6  -9   1  158.83   13.35
  -6  -9   0  378.56   23.86
  -6  -9   0  408.15   22.86
   6   9   1  624.41   66.01
  -6  -9  -1  689.03   33.94
  -6  -9  -1  679.16   31.80
   6   9   2   57.94   19.18
  -6  -9  -2   70.53    9.61
  -6  -9  -2   70.42    8.98
   6   9   3  206.14   36.66
  -6  -9  -3  247.35   35.46
  -6  -9  -3  223.28   17.61
  -6  -9  -3  249.59   17.28
  -6  -9  -4  615.66   28.90
  -6  -9  -4  582.33   29.39
  -6  -9  -5    1.87    1.47
  -6  -9  -5    0.96    2.01
  -6  -9  -5    0.40    2.06
  -6  -9  -6  365.75   21.65
  -6  -9  -6  402.18   23.37
  -6  -9  -6  405.68   22.62
  -6  -9  -7    2.66    2.43
  -6  -9  -7    5.04    3.44
  -6  -9  -7    6.99    2.07
  -6  -9  -8  285.45   18.89
  -6  -9  -8  290.22   18.56
  -6  -9  -8  304.48   19.56
  -6  -9  -9   92.29   10.22
  -6  -9  -9   98.30   10.12
  -6  -9  -9   94.31    9.98
  -6  -9 -10   67.08    8.03
  -6  -9 -10   74.64    8.40
  -6  -9 -10   76.49    8.44
  -6  -9 -11  197.89   13.35
  -6  -9 -12   12.58    3.06
  -6  -9 -12   14.15    3.54
  -6  -9 -13  177.28   11.25
  -6  -9 -13  169.97    9.28
  -6  -9 -14    9.79    1.94
  -6 -10   9   34.25    3.47
  -6 -10   8   18.99    3.30
  -6 -10   7  221.09   13.33
  -6 -10   6   -2.70    2.53
  -6 -10   6   -1.32    1.01
  -6 -10   5  160.91   12.68
  -6 -10   5  122.63    9.62
  -6 -10   4   62.80    8.06
  -6 -10   4   55.87    6.68
  -6 -10   3   90.57   10.36
  -6 -10   3   72.75    7.96
  -6 -10   2  269.60   18.60
  -6 -10   2  226.98   15.45
  -6 -10   1   -0.40    1.97
  -6 -10   1    0.15    1.75
  -6 -10   0  344.93   21.86
  -6 -10   0  303.21   18.81
  -6 -10  -1  103.45   11.51
  -6 -10  -1   65.85    8.28
  -6 -10  -2  182.09   15.27
  -6 -10  -2  140.23   12.26
  -6 -10  -3  283.92   19.28
  -6 -10  -3  214.42   15.78
  -6 -10  -4   60.94    8.53
  -6 -10  -4   45.02    6.56
  -6 -10  -5  412.15   22.35
  -6 -10  -5  416.09   22.90
  -6 -10  -5  406.96   23.62
  -6 -10  -6    8.42    3.08
  -6 -10  -6    7.61    3.05
  -6 -10  -6   14.67    4.47
  -6 -10  -6    9.13    3.05
  -6 -10  -7  311.86   19.22
  -6 -10  -7  328.97   19.56
  -6 -10  -7  327.95   20.27
  -6 -10  -7  343.90   20.39
  -6 -10  -8   54.84    7.37
  -6 -10  -8   40.16    6.57
  -6 -10  -8   54.67    7.55
  -6 -10  -8   52.74    7.32
  -6 -10  -9    8.29    2.53
  -6 -10  -9    9.45    3.06
  -6 -10  -9    9.25    3.51
  -6 -10  -9   10.11    2.84
  -6 -10 -10  261.81   15.64
  -6 -10 -10  259.51   15.53
  -6 -10 -10  248.48   16.22
  -6 -10 -10  255.84   15.08
  -6 -10 -11    0.05    1.16
  -6 -10 -11    1.28    1.18
  -6 -10 -12  101.49    8.35
  -6 -10 -13   60.20    5.42
  -6 -11   7   23.89    3.34
  -6 -11   6  153.07   10.35
  -6 -11   5   97.83    8.76
  -6 -11   4   64.35    7.52
  -6 -11   3   95.74    9.87
  -6 -11   2    2.85    2.32
  -6 -11   2    2.02    1.53
  -6 -11   1  206.95   15.65
  -6 -11   1  206.03   13.47
  -6 -11   0  186.76   14.91
  -6 -11   0  190.05   13.16
  -6 -11  -1  112.06   11.12
  -6 -11  -1   77.76    8.33
  -6 -11  -2  221.37   15.95
  -6 -11  -2  161.57   12.56
  -6 -11  -3   67.34    7.88
  -6 -11  -3   92.26   10.02
  -6 -11  -4  221.36   15.11
  -6 -11  -4  289.54   18.22
  -6 -11  -5  103.96   10.62
  -6 -11  -5   92.93    9.11
  -6 -11  -6  214.55   14.04
  -6 -11  -6  210.15   14.65
  -6 -11  -6  216.67   15.07
  -6 -11  -7  272.35   16.23
  -6 -11  -7  271.52   16.27
  -6 -11  -8   17.68    3.67
  -6 -11  -8   22.88    4.46
  -6 -11  -8   21.71    4.44
  -6 -11  -8   22.85    4.30
  -6 -11  -9  333.59   17.55
  -6 -11  -9  322.10   17.64
  -6 -11  -9  325.44   16.97
  -6 -11 -10    8.39    2.52
  -6 -11 -10    8.09    2.57
  -6 -11 -11   83.36    7.16
  -6 -11 -12  113.15    7.44
  -6 -12   6  118.41    7.37
  -6 -12   5   19.97    3.18
  -6 -12   4  138.80    9.84
  -6 -12   3   13.77    3.12
  -6 -12   2  234.54   14.81
  -6 -12   1  102.42    9.51
  -6 -12   0  124.32   10.88
  -6 -12  -1  267.41   16.90
  -6 -12  -2    5.21    2.88
  -6 -12  -3  133.52   11.23
  -6 -12  -3  122.60    9.43
  -6 -12  -4  181.46   13.15
  -6 -12  -5  105.69    9.42
  -6 -12  -6  263.01   15.34
  -6 -12  -6  263.88   15.47
  -6 -12  -7    1.76    1.26
  -6 -12  -7    5.40    2.19
  -6 -12  -8  323.92   16.25
  -6 -12  -8  291.54   15.18
  -6 -12  -9    7.58    2.75
  -6 -12  -9    4.07    1.54
  -6 -13   4   12.00    2.10
  -6 -13   3   57.84    5.30
  -6 -13   2  104.12    7.79
  -6 -13   1   11.65    2.78
  -6 -13   0   94.03    7.93
  -6 -13  -1    8.93    2.54
  -6 -13  -2  181.98   11.90
  -6 -13  -3   54.56    6.02
  -6 -13  -4   73.83    7.07
  -6 -13  -5  144.37    9.75
  -6 -13  -5  150.94   10.05
  -6 -13  -6    0.53    1.59
  -6 -13  -6   -0.95    1.21
  -6 -13  -7  183.78   10.57
  -6 -13  -7  178.66   10.08
  -6 -13  -8   19.64    3.02
  -6 -13  -8   14.15    2.32
  -6 -13  -9   21.51    2.88
  -6 -14   1   91.74    6.14
  -6 -14   0    8.61    1.79
  -6 -14  -1  169.39    9.49
  -6 -14  -2   56.03    5.08
  -6 -14  -3    9.17    1.89
  -6 -14  -3   12.27    2.44
  -6 -14  -4  157.89    8.71
  -6 -14  -4  157.04    8.75
  -6 -14  -5    7.35    1.82
  -6 -14  -5    3.19    1.31
  -6 -14  -6  113.84    6.80
  -6 -14  -7  142.78    7.47
   7 -11  -5    2.75    1.65
   7 -11  -4   22.84    3.91
   7 -11  -3  148.44   10.99
   7 -11  -2   94.40    8.86
   7 -11  -1  122.60   10.24
   7 -11  -1  114.91    7.94
   7 -11   0    3.08    2.60
   7 -11   0    1.77    1.10
   7 -11   1  182.83   12.30
   7 -11   1  167.02    9.88
   7 -11   2   85.53    7.94
   7 -11   2   84.99    6.40
  -7  11  -3   52.27    5.04
   7 -11   3   67.96    6.42
   7 -11   3   59.32    4.91
  -7  11  -4   70.39    5.45
   7 -10  -8   30.90    3.40
   7 -10  -8   24.35    3.46
   7 -10  -7   99.78    7.06
   7 -10  -7  101.12    8.22
   7 -10  -6   41.42    4.70
   7 -10  -6   45.48    5.80
   7 -10  -5  132.68    9.04
   7 -10  -5  100.58    9.76
   7 -10  -4  130.89    9.10
   7 -10  -4  133.79   11.84
   7 -10  -3   15.01    4.02
   7 -10  -3   15.22    3.10
   7 -10  -2  104.86   10.88
   7 -10  -2  101.79    8.35
   7 -10  -1   11.67    2.70
   7 -10  -1    9.86    4.50
   7 -10   0  308.73   19.88
   7 -10   0  298.44   16.27
   7 -10   1  110.23   11.25
   7 -10   1  104.33    8.87
   7 -10   2    9.28    2.78
   7 -10   2    5.19    2.27
   7 -10   3  117.43   10.74
   7 -10   3  130.66    9.20
   7 -10   4    0.78    1.40
   7 -10   4    0.50    1.37
  -7  10  -5   52.46    5.47
   7 -10   5   54.74    4.81
  -7  10  -6   30.89    3.72
   7  -9  -9    8.07    2.40
   7  -9  -8  162.54   11.49
   7  -9  -7   27.24    5.20
   7  -9  -6  115.30   11.35
   7  -9  -5  127.67   12.46
   7  -9  -4   -0.83    2.56
   7  -9  -4    1.84    0.91
   7  -9  -3  292.60   16.36
   7  -9  -3  267.27   19.94
   7  -9  -3  262.69   15.44
   7  -9  -2    8.75    3.62
   7  -9  -2   16.58    3.87
   7  -9  -1  369.08   24.39
   7  -9  -1  345.48   19.45
   7  -9   0  217.34   18.23
   7  -9   0  187.71   13.95
   7  -9   1    9.06    3.20
   7  -9   1   13.55    4.81
   7  -9   2  280.38   20.15
   7  -9   2  272.83   16.67
   7  -9   3    2.78    2.37
   7  -9   3    3.67    2.11
   7  -9   4   82.29    9.75
   7  -9   4   89.33    8.14
   7  -9   5   87.30    9.21
   7  -9   5   85.92    7.37
  -7   9  -6   55.91    6.21
   7  -9   6   71.77    6.06
  -7   9  -7  100.60    7.56
  -7   9  -8    2.36    1.00
   7  -8 -10    2.73    1.50
   7  -8  -9  192.26   13.04
   7  -8  -8  112.43   10.72
   7  -8  -7   60.38    8.40
   7  -8  -6  125.31   13.00
   7  -8  -5    3.29    3.17
   7  -8  -4  230.11   19.07
   7  -8  -4  201.35   13.40
   7  -8  -3   57.61    9.95
   7  -8  -3   58.65    7.43
   7  -8  -2  213.70   19.11
   7  -8  -2  206.40   14.81
   7  -8  -1  221.96   19.50
   7  -8   0   15.16    5.34
   7  -8   1  203.51   18.47
   7  -8   2    0.30    2.58
   7  -8   3  197.18   17.44
   7  -8   4  108.79   12.23
   7  -8   4  103.31    9.85
   7  -8   5   75.17    9.62
   7  -8   5   69.63    7.64
  -7   8  -6  116.96    8.74
   7  -8   6  111.62   11.07
   7  -8   6  109.60    8.85
  -7   8  -7   16.60    3.86
  -7   8  -7   15.81    2.90
   7  -8   7   20.16    3.35
  -7   8  -8  104.83    7.92
  -7   8  -8  100.54    6.83
  -7   8  -9   18.57    2.70
   7  -7 -11   -0.04    0.93
   7  -7 -10  142.12   10.79
   7  -7  -9  167.08   13.10
   7  -7  -8   39.59    7.27
   7  -7  -7  180.85   15.84
   7  -7  -6   -1.21    3.07
   7  -7  -5  216.60   18.81
   7  -7  -4   23.02    6.02
   7  -7  -4   20.86    3.99
   7  -7  -3   31.37    7.53
   7  -7  -2  217.04   19.56
   7  -7  -1   30.72    7.42
   7  -7   0  118.38   14.43
   7  -7   1   46.36    9.10
  -7   7  -2  132.41   11.58
   7  -7   2  117.44   14.05
  -7   7  -3  141.44   12.05
   7  -7   3   99.72   12.82
  -7   7  -4   54.12    7.36
   7  -7   4   50.03    9.00
  -7   7  -5  285.35   17.47
   7  -7   5  261.81   19.99
  -7   7  -6    1.87    1.89
   7  -7   6    3.75    2.52
  -7   7  -7   80.38    8.07
   7  -7   7   80.88    7.56
  -7   7  -8   56.96    6.58
  -7   7  -8   71.08    7.00
  -7   7  -9    8.64    2.14
  -7   7  -9   10.22    2.26
  -7   7 -10   76.46    5.76
   7  -6 -12   16.82    2.83
   7  -6 -11   50.18    6.20
   7  -6 -10  115.83   10.43
   7  -6  -9   23.64    5.39
   7  -6  -8  350.00   22.74
   7  -6  -7    5.90    3.51
   7  -6  -6  195.41   18.07
   7  -6  -5   45.38    8.31
   7  -6  -4   69.32   10.78
   7  -6  -3  405.67   27.85
   7  -6  -2    2.72    2.76
  -7   6   1  240.33   16.70
   7  -6  -1  223.64   20.26
  -7   6   0  186.61   14.62
   7  -6   0  151.91   16.55
  -7   6  -1  149.28   13.04
   7  -6   1  129.93   14.93
  -7   6  -2  269.65   18.33
   7  -6   2  244.35   21.06
  -7   6  -3    3.17    3.40
   7  -6   3   -0.90    2.69
  -7   6  -4  326.26   20.63
   7  -6   4  320.31   23.45
  -7   6  -5    0.98    1.99
   7  -6   5    4.04    3.42
  -7   6  -6  194.84   14.92
   7  -6   6  197.21   16.67
  -7   6  -7  193.69   14.33
  -7   6  -8   27.54    5.16
  -7   6  -8   26.44    4.98
  -7   6  -9   78.42    7.52
  -7   6  -9   96.12    8.65
  -7   6 -10    9.94    2.55
  -7   6 -11   50.68    4.76
   7  -5 -12   60.10    6.07
   7  -5 -11   99.02    7.28
   7  -5 -11   78.99    8.21
   7  -5 -10   10.57    2.61
   7  -5 -10    9.89    3.49
   7  -5  -9  350.33   22.39
   7  -5  -8  108.44   12.38
   7  -5  -7  150.03   15.55
  -7   5   6  216.66   15.19
   7  -5  -6  211.63   18.79
  -7   5   5   28.46    5.26
   7  -5  -5   33.23    6.98
  -7   5   4  421.26   23.56
   7  -5  -4  433.15   28.35
   7  -5  -3   11.48   11.36
  -7   5   3   11.67    3.80
   7  -5  -3   18.70    6.14
  -7   5   2  248.24   17.38
   7  -5  -2  228.52   19.81
   7  -5  -2  233.90   43.47
  -7   5   1  281.14   18.83
   7  -5  -1  263.54   21.62
   7  -5  -1  293.81   47.26
  -7   5   0  283.59   19.05
   7  -5   0  243.24   20.92
  -7   5  -1  198.93   15.80
   7  -5   1  163.01   16.78
   7  -5   1  197.64   38.70
  -7   5  -2  121.82   12.31
   7  -5   2  105.93   13.29
   7  -5   2  118.17   29.85
  -7   5  -3  375.26   22.96
   7  -5   3  340.48   24.82
   7  -5   3  395.57   53.63
  -7   5  -4  104.97   11.40
   7  -5   4  101.16   12.43
  -7   5  -5  199.79   16.22
   7  -5   5  223.14   18.72
  -7   5  -6  141.75   13.25
   7  -5   6  141.63   14.30
  -7   5  -7    2.83    2.39
   7  -5   7   -1.43    1.72
  -7   5  -8  103.42   10.19
  -7   5  -8  131.18   12.06
  -7   5  -9   35.56    5.34
  -7   5  -9   36.78    6.03
  -7   5 -10   80.15    8.26
  -7   5 -11   79.60    7.21
  -7   5 -12   -0.40    0.91
   7  -4 -13   57.95    5.09
   7  -4 -12  172.65   11.42
   7  -4 -11   20.70    4.59
   7  -4 -10  246.45   17.47
   7  -4  -9   61.26    9.27
   7  -4  -8  143.89   14.56
   7  -4  -7  391.96   26.03
  -7   4   6   34.42    6.21
   7  -4  -6   40.84    8.15
  -7   4   5  341.80   21.32
   7  -4  -5  354.76   53.95
   7  -4  -5  367.08   25.30
   7  -4  -4   68.83   21.41
  -7   4   4   67.92    8.91
   7  -4  -4   67.36   10.47
  -7   4   3  571.97   29.51
   7  -4  -3  578.46   33.08
   7  -4  -3  608.85   70.04
  -7   4   2  200.46   15.87
   7  -4  -2  196.81   18.06
   7  -4  -2  229.63   42.18
  -7   4   1  187.81   15.13
   7  -4  -1  155.32   16.01
   7  -4  -1  210.33   40.09
  -7   4   0  405.42   23.75
   7  -4   0  377.00   52.72
   7  -4   0  381.35   26.02
   7  -4   1   54.86   21.37
  -7   4  -1   63.98    8.54
   7  -4   1   58.04    9.83
  -7   4  -2  274.10   19.18
   7  -4   2  240.53   20.26
   7  -4   2  295.29   46.59
  -7   4  -3  224.57   17.46
   7  -4   3  263.65   43.74
   7  -4   3  212.90   18.61
   7  -4   4   -8.18   16.06
  -7   4  -4    3.45    2.89
   7  -4   4    1.59    3.12
  -7   4  -5  531.69   29.19
   7  -4   5  578.02   31.66
   7  -4   5  577.61   65.30
   7  -4   5  479.64   51.00
  -7   4  -6    1.18    2.68
  -7   4  -7  228.53   17.52
  -7   4  -8  192.68   15.64
  -7   4  -9  128.91   12.07
  -7   4 -10  241.08   15.99
  -7   4 -11   -1.20    2.06
  -7   4 -12  209.82   12.06
   7  -3 -13   92.66    7.00
   7  -3 -12   -1.57    1.94
   7  -3 -11  122.56   11.17
   7  -3 -10  132.66   13.01
   7  -3  -9  197.86   16.86
   7  -3  -8  229.99   19.00
   7  -3  -7    2.08    3.29
   7  -3  -6  904.73   43.61
   7  -3  -5  276.93   21.40
   7  -3  -5  267.04   46.65
   7  -3  -4  488.30   29.57
   7  -3  -4  590.77   68.78
  -7   3   3  110.35   11.81
   7  -3  -3  116.37   31.67
   7  -3  -3  125.62   14.21
   7  -3  -2   32.50   15.33
  -7   3   2   17.87    4.63
   7  -3  -2   21.68    5.86
  -7   3   1 1490.73   56.58
   7  -3  -1 1620.11  113.20
   7  -3  -1 1414.78   58.93
   7  -3   0   21.24   13.92
  -7   3   0   15.61    4.50
   7  -3   0   18.53    5.01
   7  -3   1   76.30   22.84
  -7   3  -1   67.40    9.03
   7  -3   1   63.80    9.34
  -7   3  -2  308.04   20.60
   7  -3   2  275.13   20.87
   7  -3   2  343.53   48.84
   7  -3   3   82.77   22.82
  -7   3  -3   85.54   10.36
   7  -3   4  748.40   73.10
   7  -3   4  713.64   62.21
  -7   3  -4  736.47   35.54
   7  -3   5   -3.60   10.07
   7  -3   5  -11.98    8.27
  -7   3  -5    2.42    2.58
   7  -3   6  336.56   41.80
  -7   3  -6  338.03   22.31
  -7   3  -7  541.31   29.40
  -7   3  -8  290.67   20.26
  -7   3  -8  289.80   17.87
  -7   3  -9  533.81   28.03
  -7   3 -10   14.59    3.96
  -7   3 -11  220.90   14.62
   7  -3  11  201.62   13.58
  -7   3 -12   38.26    5.16
   7  -3  12   40.12    4.99
  -7   3 -13   44.36    4.75
   7  -2 -13   20.82    3.23
   7  -2 -12  215.18   13.84
   7  -2 -11  100.52   10.21
   7  -2 -10   32.73    6.01
   7  -2  -9  321.14   22.15
   7  -2  -8   12.19    4.84
   7  -2  -7  267.20   20.77
   7  -2  -6  220.32   47.43
   7  -2  -6  180.60   16.80
   7  -2  -5   49.34   19.32
   7  -2  -5   41.98    7.80
   7  -2  -4  967.12   88.82
   7  -2  -4  922.48   43.28
   7  -2  -3   14.31    6.63
   7  -2  -3   13.66    4.36
  -7   2   2  654.36   32.45
   7  -2  -2  644.91   33.75
   7  -2  -2  687.52   71.50
   7  -2  -1   25.48   16.25
  -7   2   1   18.62    5.11
   7  -2   0  186.19   35.00
  -7   2   0  159.44   14.11
   7  -2   1  783.58   73.13
  -7   2  -1  748.35   35.11
   7  -2   2  235.72   39.44
  -7   2  -2  226.77   17.23
   7  -2   3  509.94   58.25
  -7   2  -3  500.23   27.39
   7  -2   4  118.02   28.27
   7  -2   4   99.77   22.31
  -7   2  -4  132.35   13.22
   7  -2   5  685.17   60.39
  -7   2  -5  701.36   34.59
   7  -2   6   77.01   19.94
  -7   2  -6   80.80   10.21
   7  -2   7  129.36   25.72
  -7   2  -7  137.42   13.53
  -7   2  -7  142.90   12.17
  -7   2  -8  291.44   20.54
  -7   2  -8  325.26   19.76
  -7   2  -9    2.94    2.94
  -7   2  -9    3.54    2.32
  -7   2 -10  325.18   20.35
  -7   2 -10  318.35   19.01
  -7   2 -11   13.14    3.85
   7  -2  11   11.87    4.00
  -7   2 -12   39.67    5.53
   7  -2  12   21.28    4.26
   7  -2  13   46.63    5.36
  -7   2 -13   59.57    5.89
   7  -1 -13   68.42    6.23
   7  -1 -12  176.06   12.40
   7  -1 -11   23.30    5.05
   7  -1 -10  479.12   26.85
   7  -1  -9   24.15    6.22
   7  -1  -8   71.71   10.83
   7  -1  -7  120.00   13.23
   7  -1  -6   11.85    7.86
   7  -1  -6   25.18    6.14
   7  -1  -5  499.63   62.26
   7  -1  -5  468.86   28.22
   7  -1  -4   17.49   11.73
   7  -1  -4   17.13    4.84
   7  -1  -3  600.40   34.88
   7  -1  -3  587.19   65.71
   7  -1  -2  356.40   49.90
   7  -1  -1  542.45   61.08
  -7   1   1  592.46   30.10
   7  -1   0  762.20   71.54
   7  -1   1   47.42   16.94
   7  -1   2  367.35   47.58
  -7   1  -2  339.63   21.46
   7  -1   3  351.93   46.70
   7  -1   3  328.43   39.24
  -7   1  -3  354.63   22.03
   7  -1   4  783.44   71.33
   7  -1   4  681.23   58.35
  -7   1  -4  697.76   33.90
   7  -1   5  110.66   22.90
  -7   1  -5  114.09   12.02
   7  -1   6   14.54   12.26
  -7   1  -6    3.11    3.22
  -7   1  -6    2.74    1.87
   7  -1   7  248.14   36.20
  -7   1  -7  271.41   19.48
  -7   1  -7  280.12   18.51
  -7   1  -8   11.76    3.24
  -7   1  -8   16.20    5.17
  -7   1  -8    8.48    2.22
  -7   1  -9  194.94   15.97
  -7   1  -9  211.88   15.81
  -7   1 -10  127.23   12.17
  -7   1 -10  125.08   11.58
  -7   1 -11  208.98   15.06
  -7   1 -11  210.44   14.93
  -7   1 -12  144.37   11.20
   7  -1  12  115.84   10.80
  -7   1 -13    8.50    2.37
   7  -1  13    7.26    2.64
   7  -1  14   55.57    5.37
   7   0 -13  116.35    8.29
   7   0 -12   31.98    5.01
   7   0 -11   79.64    9.31
   7   0 -10   95.79   10.69
   7   0  -9  509.72   28.71
   7   0  -9  476.22   28.27
   7   0  -8  171.22   15.74
   7   0  -8  156.76   15.37
   7   0  -7   42.23    7.76
   7   0  -7   42.37    8.20
   7   0  -6  130.56   28.88
   7   0  -6  181.01   16.39
   7   0  -6  184.04   16.92
   7   0  -5   -0.14    2.64
   7   0  -5   -0.45    2.72
   7   0  -4  534.43   29.62
   7   0  -4  498.52   60.90
   7   0  -3  192.32   36.94
   7   0  -2   45.96   18.25
   7   0  -1  810.50   73.86
   7   0   0    9.77    7.57
   7   0   1  851.13   72.91
   7   0   2  237.40   37.24
   7   0   3  467.19   52.23
   7   0   3  436.82   44.40
   7   0   4  254.94   38.58
   7   0   4  245.45   33.36
  -7   0  -4  253.65   18.01
   7   0   5   -3.82    8.20
  -7   0  -5    5.06    2.56
   7   0   6 1024.99   74.05
  -7   0  -6  990.49   43.18
   7   0   7  174.72   29.60
  -7   0  -7  139.10   11.96
  -7   0  -7  159.32   14.27
   7   0   8    3.36    4.38
  -7   0  -8   11.69    3.33
  -7   0  -8    8.61    3.24
  -7   0  -9  198.67   15.98
  -7   0  -9  208.97   14.21
  -7   0  -9  186.72   15.25
  -7   0 -10  251.89   17.65
  -7   0 -10  246.09   17.49
  -7   0 -11  283.35   17.89
  -7   0 -11  284.38   18.29
  -7   0 -12    1.65    1.42
  -7   0 -12    6.51    3.47
  -7   0 -13  187.90   11.63
   7   0  13  149.59   12.12
   7   0  14   19.84    3.53
   7   1 -13    2.75    1.26
   7   1 -12  191.14   12.63
   7   1 -11   63.35    7.81
   7   1 -10  169.78   14.43
   7   1 -10  168.16   14.46
   7   1  -9  176.06   15.56
   7   1  -9  169.13   15.64
   7   1  -8    0.54    2.91
   7   1  -7  328.09   23.31
   7   1  -6   39.00   22.61
   7   1  -6   46.30    8.65
   7   1  -5  241.78   41.35
   7   1  -5  220.99   17.81
   7   1  -5  230.79   18.74
   7   1  -4  502.83   59.21
   7   1  -4  541.25   28.95
   7   1  -4  501.80   29.31
   7   1  -3  208.28   36.74
   7   1  -3  232.40   18.08
   7   1  -2  381.35   49.00
   7   1  -1   -5.27    9.19
   7   1   0  512.02   55.06
   7   1   1  151.28   28.24
   7   1   2  321.72   41.61
   7   1   3  258.27   37.53
   7   1   3  262.37   32.48
   7   1   4   -0.28    9.22
   7   1   4   14.03    6.87
  -7  -1  -4   11.55    3.89
   7   1   5  864.78   64.80
  -7  -1  -5  921.14   39.78
  -7  -1  -5  898.70   37.93
   7   1   6  170.79   28.16
  -7  -1  -6  194.53   15.69
  -7  -1  -7  187.48   14.28
  -7  -1  -7  185.29   15.41
   7   1   8  129.09   24.53
  -7  -1  -8  125.37   12.17
  -7  -1  -8  128.64   11.55
  -7  -1  -9   21.41    5.01
  -7  -1  -9   11.45    3.35
  -7  -1 -10  227.23   14.76
  -7  -1 -10  216.42   16.43
  -7  -1 -11   19.87    4.55
  -7  -1 -11   19.84    4.63
  -7  -1 -12  155.75   11.89
  -7  -1 -12  213.26   14.47
  -7  -1 -13   70.82    6.72
  -7  -1 -13   67.72    7.38
   7   1  14    1.87    1.38
   7   1  15   86.10    6.41
   7   2 -13  156.52    8.85
  -7  -2  13  134.60    7.62
   7   2 -12   39.65    5.17
   7   2 -11   30.57    5.33
   7   2 -11   25.82    5.04
   7   2 -10  431.74   24.68
   7   2  -9   30.02    6.50
   7   2  -8  196.32   17.06
   7   2  -7   40.75    7.64
   7   2  -6  249.19   41.80
   7   2  -6  250.25   19.73
   7   2  -5  853.43   77.69
   7   2  -5  887.26   41.76
   7   2  -4   23.27   10.71
   7   2  -4   44.34    7.82
   7   2  -3  233.97   37.57
   7   2  -3  267.58   19.34
   7   2  -2  220.99   36.79
   7   2  -1  530.96   55.64
   7   2   0  106.36   20.04
   7   2   0   82.41   21.76
   7   2   1  179.77   26.67
   7   2   1  215.35   32.97
   7   2   2 1035.62   71.35
   7   2   2 1219.65   82.46
   7   2   3    5.98   10.75
   7   2   4  688.73   60.51
   7   2   4  567.44   49.42
   7   2   5   62.89   15.83
  -7  -2  -5   67.38    8.52
  -7  -2  -5   66.06    7.92
  -7  -2  -5   61.75    8.24
   7   2   6  169.95   26.70
  -7  -2  -6  188.40   14.57
  -7  -2  -6  219.16   16.21
  -7  -2  -6  208.70   15.76
  -7  -2  -6  192.53   14.24
   7   2   7  525.18   50.02
  -7  -2  -7  560.33   27.48
  -7  -2  -7  543.33   28.20
  -7  -2  -7  537.62   28.47
   7   2   8   -1.99    4.39
  -7  -2  -8    0.91    2.31
  -7  -2  -8   -1.81    2.29
  -7  -2  -9  318.98   20.48
  -7  -2  -9  405.41   21.70
  -7  -2 -10   58.49    7.88
  -7  -2 -10   73.37    8.20
  -7  -2 -11  113.08   10.44
  -7  -2 -11  123.53   10.40
  -7  -2 -11  118.60   11.69
  -7  -2 -12  243.64   14.67
  -7  -2 -12  250.76   16.68
  -7  -2 -13    5.38    2.58
  -7  -2 -14  122.11    8.83
   7   2  15    8.18    2.11
   7   3 -12   37.37    4.67
   7   3 -11  179.02   12.62
   7   3 -11  177.54   13.11
   7   3 -10    3.93    2.92
   7   3  -9  216.78   17.23
   7   3  -8  362.68   23.86
   7   3  -7  413.77   26.03
   7   3  -6  379.28   24.70
   7   3  -5    7.67    3.46
   7   3  -4  726.95   35.97
   7   3  -3   88.18   10.37
  -7  -3   2  410.64   22.70
   7   3  -1   40.74   13.54
   7   3   0   44.94   14.43
   7   3   1 2048.82  108.12
   7   3   2   41.54   13.72
   7   3   3  285.98   38.00
   7   3   4  568.29   47.84
  -7  -3  -4  603.83   28.32
   7   3   5  179.34   26.31
  -7  -3  -5  212.70   15.23
  -7  -3  -5  230.64   16.44
   7   3   6  452.53   43.95
  -7  -3  -6  521.06   25.88
  -7  -3  -6  450.66   24.32
  -7  -3  -6  459.80   25.84
   7   3   7    4.50    7.62
  -7  -3  -7    0.59    1.53
  -7  -3  -7   -0.45    2.37
   7   3   8  198.86   29.52
  -7  -3  -8  199.09   14.95
  -7  -3  -8  170.05   14.99
  -7  -3  -9  376.42   21.78
  -7  -3 -10  151.66   12.58
  -7  -3 -11  175.54   12.94
  -7  -3 -12    9.81    3.04
  -7  -3 -12    5.28    2.27
  -7  -3 -13  221.91   14.26
  -7  -3 -14   69.65    6.52
   7   3  15   77.62    6.49
   7   4 -12  138.48    8.55
  -7  -4  12  126.60    7.97
   7   4 -11    9.09    2.50
   7   4 -11   11.09    3.38
   7   4 -10  213.25   15.31
   7   4  -9  101.15   10.89
   7   4  -8  146.84   14.11
   7   4  -7  282.91   20.53
   7   4  -6    6.81    3.35
   7   4  -5  754.53   36.89
   7   4  -4   77.01   10.10
  -7  -4   3  323.02   20.07
  -7  -4   3  374.57   21.84
   7   4  -3  359.07   22.40
  -7  -4   2  843.71   36.27
  -7  -4   2  862.81   36.87
   7   4  -1   61.42   16.22
  -7  -4   1   75.89    8.81
  -7  -4   1   80.55    9.08
   7   4   0  215.86   32.33
  -7  -4   0  286.58   18.00
   7   4   1   23.99   12.01
  -7  -4  -1   13.15    2.97
   7   4   2  150.82   27.01
  -7  -4  -2  145.84   12.32
   7   4   3  854.38   69.15
  -7  -4  -3  875.66   36.77
  -7  -4  -3  834.18   36.26
   7   4   4  397.93   47.19
  -7  -4  -4  399.96   22.02
  -7  -4  -4  361.60   21.14
  -7  -4  -4  368.66   21.74
  -7  -4  -5  243.03   16.78
  -7  -4  -5  227.92   16.29
  -7  -4  -5  236.76   17.08
  -7  -4  -6  198.03   15.16
  -7  -4  -6  224.49   15.98
  -7  -4  -6  188.23   15.54
  -7  -4  -7 1072.63   43.21
  -7  -4  -7 1021.07   44.25
  -7  -4  -7 1052.63   42.88
  -7  -4  -8   70.39    8.81
  -7  -4  -8   59.49    8.61
  -7  -4  -9   57.64    7.87
  -7  -4  -9   59.56    8.61
  -7  -4 -10  101.19   10.33
  -7  -4 -11   13.63    3.69
  -7  -4 -12  170.35   12.07
  -7  -4 -12  164.18   13.09
  -7  -4 -13   62.87    6.09
  -7  -4 -13   58.29    6.95
  -7  -4 -14   52.72    5.51
   7   4  15  110.50    7.86
  -7  -4 -15  133.13    7.52
  -7  -5  12    9.83    1.83
   7   5 -11  162.13    9.95
   7   5 -11  162.22   10.74
   7   5 -10   41.24    5.94
  -7  -5  10   40.74    5.44
   7   5  -9   39.03    6.34
   7   5  -8  260.98   18.52
  -7  -5   7    6.04    2.08
   7   5  -7    7.02    3.76
  -7  -5   6  114.70   11.03
   7   5  -6  115.10   12.41
  -7  -5   5  174.87   14.12
   7   5  -5  192.47   15.99
  -7  -5   4  210.77   15.84
  -7  -5   4  207.21   16.12
   7   5  -4  211.27   16.69
  -7  -5   3  592.22   29.50
  -7  -5   3  607.69   29.87
   7   5  -2   46.23   16.68
  -7  -5   2   37.53    6.47
  -7  -5   2   56.87    7.86
   7   5  -1  151.01   28.67
  -7  -5   1  113.14   11.65
  -7  -5   1  147.71   12.86
   7   5   0  469.09   50.85
  -7  -5   0  412.95   23.73
  -7  -5   0  417.79   23.33
   7   5   1  741.41   65.22
  -7  -5  -1  715.24   34.15
  -7  -5  -1  796.71   34.52
  -7  -5  -2  411.70   22.06
   7   5   2  383.73   46.20
  -7  -5  -2  389.36   23.39
  -7  -5  -2  406.26   22.76
  -7  -5  -2  400.42   22.56
   7   5   3   -2.21    8.88
  -7  -5  -3    5.41    2.87
  -7  -5  -3    5.15    2.99
  -7  -5  -3    4.91    3.81
   7   5   4  732.45   67.29
  -7  -5  -4  779.17   34.11
  -7  -5  -4  730.68   33.75
  -7  -5  -4  721.96   33.93
   7   5   5   80.72   23.35
  -7  -5  -5   63.36    8.21
  -7  -5  -5   56.98    8.01
  -7  -5  -5   69.86    9.27
  -7  -5  -6  576.48   28.70
  -7  -5  -6  572.51   27.41
  -7  -5  -6  574.85   28.66
  -7  -5  -6  550.47   29.31
  -7  -5  -7  128.74   12.10
  -7  -5  -7  140.63   12.33
  -7  -5  -7  126.97   12.78
  -7  -5  -7  137.98   12.74
  -7  -5  -8    4.51    2.92
  -7  -5  -8    2.12    2.19
  -7  -5  -9  600.85   29.74
  -7  -5  -9  608.76   30.89
  -7  -5 -10   20.79    5.20
  -7  -5 -11   67.11    8.03
  -7  -5 -12   78.38    7.88
  -7  -5 -13   34.58    4.45
  -7  -5 -13   36.39    5.36
  -7  -5 -14  129.13    7.58
  -7  -5 -14  137.53    9.02
  -7  -5 -15    0.26    0.61
   7   6 -11   49.25    5.04
  -7  -6  11   50.94    4.67
   7   6 -10   24.99    4.36
  -7  -6  10   22.25    3.69
  -7  -6   9   75.63    6.94
  -7  -6   9   72.00    7.66
   7   6  -9   74.63    8.33
  -7  -6   8   39.13    5.61
   7   6  -8   38.31    6.26
  -7  -6   8   41.71    6.49
  -7  -6   7  160.83   12.70
  -7  -6   7  149.40   12.85
   7   6  -7  149.75   13.41
  -7  -6   6   83.86    9.40
  -7  -6   6   88.87    9.81
   7   6  -6   90.34   10.43
  -7  -6   5  111.79   11.32
  -7  -6   5  125.52   12.28
   7   6  -5  134.56   12.73
  -7  -6   4  318.87   20.47
  -7  -6   4  325.63   20.84
   7   6  -3   -0.56    7.68
  -7  -6   3    2.70    1.85
  -7  -6   3    7.74    3.39
   7   6  -2  541.86   57.93
  -7  -6   2  472.86   26.38
  -7  -6   2  510.75   26.89
   7   6  -1   97.80   24.27
  -7  -6   1   77.45    9.81
  -7  -6   1  104.72   10.96
   7   6   0   31.25   15.62
  -7  -6   0   19.43    5.25
  -7  -6   0   20.83    5.24
  -7  -6  -1  440.63   25.29
  -7  -6  -1  456.37   24.67
  -7  -6  -2    3.06    1.96
  -7  -6  -2    5.40    2.78
  -7  -6  -2    3.23    3.20
   7   6   3  829.46   73.45
  -7  -6  -3  878.42   37.14
  -7  -6  -3  896.24   37.97
  -7  -6  -3  823.61   37.65
   7   6   4    8.59    6.61
  -7  -6  -4    1.57    2.53
  -7  -6  -4    2.65    2.02
  -7  -6  -4    6.31    3.10
   7   6   5  102.66   26.32
  -7  -6  -5   89.41    9.97
  -7  -6  -5   91.95   10.25
  -7  -6  -5   72.73    9.52
  -7  -6  -6  258.76   17.90
   7   6   6  260.98   41.04
  -7  -6  -6  257.10   17.06
  -7  -6  -6  257.07   17.87
  -7  -6  -6  249.15   18.45
  -7  -6  -7   30.09    5.65
  -7  -6  -7   20.14    4.17
  -7  -6  -7   28.45    6.34
  -7  -6  -7   27.00    6.15
  -7  -6  -8  282.80   19.06
  -7  -6  -8  279.70   18.24
  -7  -6  -8  295.16   19.99
  -7  -6  -9    8.31    3.90
  -7  -6  -9    6.22    2.02
  -7  -6 -10  341.67   20.53
  -7  -6 -10  338.79   21.04
  -7  -6 -11  214.02   14.86
  -7  -6 -12   40.05    5.53
  -7  -6 -13  101.86    7.95
  -7  -6 -13  100.21    8.43
  -7  -6 -14   23.00    3.28
  -7  -7  10  153.98    8.97
   7   7 -10  143.31    9.52
  -7  -7   9   10.47    2.61
   7   7  -9   14.52    3.36
  -7  -7   9   12.78    2.86
  -7  -7   8  168.80   11.64
  -7  -7   8  176.20   12.25
   7   7  -8  155.86   12.25
  -7  -7   7   56.02    6.91
   7   7  -7   53.26    7.38
  -7  -7   7   59.83    7.45
  -7  -7   6   15.54    4.01
   7   7  -6   15.88    4.31
  -7  -7   6   21.20    4.79
  -7  -7   5  361.97   21.75
  -7  -7   5  369.54   21.83
  -7  -7   4   21.21    5.14
  -7  -7   4   30.46    5.72
  -7  -7   3  218.38   16.91
  -7  -7   3  226.94   16.70
   7   7  -2  248.70   39.82
  -7  -7   2  224.85   17.27
  -7  -7   2  244.21   17.36
   7   7  -1   79.65   23.26
  -7  -7   1   87.58   10.37
  -7  -7   1   78.40    9.25
  -7  -7   0   41.51    7.20
  -7  -7   0   37.10    6.22
   7   7   1   51.86   16.51
  -7  -7  -1   60.05    8.92
  -7  -7  -1   62.59    8.38
  -7  -7  -2   12.08    4.51
  -7  -7  -2    9.66    3.59
  -7  -7  -3   29.08    5.44
   7   7   3   43.59   18.33
  -7  -7  -3   40.52    7.10
  -7  -7  -3   38.21    6.91
  -7  -7  -3   38.72    6.76
   7   7   4   44.62   15.74
  -7  -7  -4   44.12    6.85
  -7  -7  -4   45.00    7.70
  -7  -7  -4   43.49    7.10
  -7  -7  -5  372.06   21.93
   7   7   5  362.20   48.52
  -7  -7  -5  358.88   20.59
  -7  -7  -5  373.63   22.42
  -7  -7  -5  376.74   23.25
  -7  -7  -6   -0.73    2.18
  -7  -7  -6    1.72    1.35
  -7  -7  -6   -1.84    3.50
  -7  -7  -7  241.53   17.33
  -7  -7  -7  231.80   16.33
  -7  -7  -7  245.48   17.82
  -7  -7  -7  226.11   16.84
  -7  -7  -8  102.91   10.94
  -7  -7  -8  106.62   10.67
  -7  -7  -8  105.12   11.63
  -7  -7  -9  272.23   18.31
  -7  -7  -9  289.12   18.99
  -7  -7 -10  134.41   12.01
  -7  -7 -10  144.98   12.68
  -7  -7 -11    3.66    2.00
  -7  -7 -12  228.24   13.96
  -7  -7 -13   28.89    4.02
  -7  -7 -13   30.70    4.35
  -7  -7 -14   49.44    4.43
  -7  -8   9   23.20    3.18
  -7  -8   9   26.99    3.49
   7   8  -9   25.80    3.70
  -7  -8   8  148.84   10.14
  -7  -8   8  156.47   10.27
   7   8  -8  139.47   10.17
  -7  -8   7   12.16    2.97
   7   8  -7    9.99    2.67
  -7  -8   7   12.46    3.29
  -7  -8   6  178.58   13.43
  -7  -8   6  182.44   13.30
  -7  -8   5   48.96    7.35
  -7  -8   5   43.08    6.58
  -7  -8   4   78.39    9.64
  -7  -8   4   74.89    8.96
  -7  -8   3  195.01   15.83
  -7  -8   3  194.52   15.12
  -7  -8   2  111.22   12.04
  -7  -8   2  113.05   11.42
  -7  -8   1  325.94   21.45
  -7  -8   1  316.59   20.18
  -7  -8   0   58.13    8.53
  -7  -8   0   58.75    8.08
   7   8   1  200.75   36.83
  -7  -8  -1  230.48   17.78
  -7  -8  -1  234.18   16.89
   7   8   2  188.54   36.10
  -7  -8  -2  215.92   17.20
  -7  -8  -2  218.14   16.31
   7   8   3   10.06   10.08
  -7  -8  -3   -0.30    2.55
  -7  -8  -3    2.27    2.83
  -7  -8  -3    2.29    2.65
  -7  -8  -4  372.10   20.16
  -7  -8  -4  353.01   21.41
  -7  -8  -4  358.31   22.04
  -7  -8  -5   17.29    4.12
  -7  -8  -5   15.25    4.83
  -7  -8  -5   10.70    3.93
  -7  -8  -6  159.00   13.66
  -7  -8  -6  159.60   13.03
  -7  -8  -6  157.18   13.58
  -7  -8  -6  160.60   14.23
  -7  -8  -7  257.61   17.86
  -7  -8  -7  252.39   16.93
  -7  -8  -7  255.95   18.33
  -7  -8  -7  263.82   18.15
  -7  -8  -8   99.30   10.56
  -7  -8  -8   99.15   10.05
  -7  -8  -8   92.74   10.44
  -7  -8  -9  238.32   16.62
  -7  -8  -9  226.79   15.52
  -7  -8  -9  247.72   17.05
  -7  -8 -10    3.84    2.56
  -7  -8 -10    1.70    2.48
  -7  -8 -11  345.89   18.68
  -7  -8 -12    9.41    2.62
  -7  -8 -13   72.29    6.00
  -7  -8 -13   61.39    5.52
  -7  -8 -14   90.27    6.35
  -7  -9   8    1.09    0.98
  -7  -9   8    3.20    1.11
  -7  -9   7  145.00   10.31
  -7  -9   7  143.09    9.51
  -7  -9   6   60.37    7.08
  -7  -9   6   57.06    6.39
  -7  -9   5  191.86   14.11
  -7  -9   5  197.00   13.31
  -7  -9   4  100.63   10.49
  -7  -9   4  105.73    9.97
  -7  -9   3   -0.54    2.33
  -7  -9   3    0.28    1.96
  -7  -9   2  335.68   21.57
  -7  -9   2  343.56   20.45
  -7  -9   1  149.80   13.99
  -7  -9   1  162.33   13.37
  -7  -9   0  587.27   30.69
  -7  -9   0  588.02   28.98
  -7  -9  -1  862.82   39.60
  -7  -9  -1  893.70   38.25
  -7  -9  -2   64.10    9.21
  -7  -9  -2   48.56    7.27
  -7  -9  -3  574.47   28.86
  -7  -9  -3  577.76   29.63
  -7  -9  -4    3.11    1.93
  -7  -9  -4    0.98    3.31
  -7  -9  -4    2.12    2.34
  -7  -9  -5  159.39   13.49
  -7  -9  -5  195.66   14.23
  -7  -9  -5  205.41   15.51
  -7  -9  -5  209.14   16.10
  -7  -9  -6  205.73   15.29
  -7  -9  -6  216.75   14.99
  -7  -9  -6  207.14   16.09
  -7  -9  -6  213.20   15.69
  -7  -9  -7  134.38   11.96
  -7  -9  -7  123.81   11.10
  -7  -9  -7  134.93   12.43
  -7  -9  -8  264.29   17.19
  -7  -9  -8  247.09   16.03
  -7  -9  -8  256.70   17.19
  -7  -9  -9    2.02    1.54
  -7  -9  -9    2.62    2.26
  -7  -9  -9    3.92    2.81
  -7  -9 -10  305.72   17.57
  -7  -9 -10  318.46   17.79
  -7  -9 -11   28.05    4.38
  -7  -9 -12   60.95    5.86
  -7  -9 -12   60.33    6.35
  -7  -9 -13  127.34    8.33
  -7  -9 -13  125.07    7.13
  -7 -10   7   36.49    4.28
  -7 -10   7   28.31    3.15
  -7 -10   6   43.47    5.32
  -7 -10   6   43.21    4.64
  -7 -10   5  214.74   13.86
  -7 -10   5  199.74   12.04
  -7 -10   4    0.05    2.20
  -7 -10   4   -0.23    1.18
  -7 -10   3  196.88   14.59
  -7 -10   3  182.33   12.69
  -7 -10   2  100.78   10.67
  -7 -10   2  116.53   10.28
  -7 -10   1  201.44   15.62
  -7 -10   1  217.02   14.82
  -7 -10   0  236.99   17.61
  -7 -10   0  267.64   16.95
  -7 -10  -1  119.80   12.23
  -7 -10  -1  144.03   12.20
  -7 -10  -2  631.49   31.22
  -7 -10  -2  590.29   28.74
  -7 -10  -2  645.80   30.87
  -7 -10  -3   68.66    8.24
  -7 -10  -3   81.33    9.54
  -7 -10  -4  188.31   14.18
  -7 -10  -4  180.49   14.67
  -7 -10  -5  178.86   12.94
  -7 -10  -5  175.73   12.94
  -7 -10  -5  177.48   13.76
  -7 -10  -5  177.14   14.20
  -7 -10  -6   26.63    4.91
  -7 -10  -6   39.05    5.65
  -7 -10  -6   39.54    6.25
  -7 -10  -6   44.88    6.62
  -7 -10  -7  293.28   17.56
  -7 -10  -7  302.41   17.53
  -7 -10  -7  320.12   19.05
  -7 -10  -8   -0.02    1.61
  -7 -10  -8    1.57    2.49
  -7 -10  -8    1.08    1.44
  -7 -10  -8   -3.49    1.65
  -7 -10  -9  237.85   14.60
  -7 -10  -9  246.21   14.47
  -7 -10  -9  230.53   14.83
  -7 -10  -9  248.97   15.12
  -7 -10 -10   48.56    5.76
  -7 -10 -10   54.17    6.49
  -7 -10 -10   63.23    6.62
  -7 -10 -11   23.40    3.56
  -7 -10 -11   27.69    4.24
  -7 -10 -12  162.37    9.55
  -7 -11   6  216.04   11.28
  -7 -11   5    2.54    1.30
  -7 -11   4  193.42   12.47
  -7 -11   4  174.61   10.17
  -7 -11   3   69.75    7.68
  -7 -11   3   65.67    6.26
  -7 -11   2   49.54    6.70
  -7 -11   2   55.76    6.10
  -7 -11   1  156.25   12.67
  -7 -11   1  152.29   11.01
  -7 -11   0   10.15    3.29
  -7 -11   0   14.75    3.41
  -7 -11  -1  314.79   19.09
  -7 -11  -1  277.27   16.57
  -7 -11  -2  138.81   11.13
  -7 -11  -2  157.86   13.17
  -7 -11  -3  195.18   13.58
  -7 -11  -3  208.57   15.02
  -7 -11  -4  154.57   11.27
  -7 -11  -4  147.01   11.56
  -7 -11  -4  144.23   12.20
  -7 -11  -5   21.82    4.33
  -7 -11  -5   16.52    3.61
  -7 -11  -5   20.98    4.34
  -7 -11  -6  258.72   14.74
  -7 -11  -6  283.08   15.86
  -7 -11  -6  280.73   16.86
  -7 -11  -7    7.62    2.44
  -7 -11  -7   13.18    3.12
  -7 -11  -7   13.59    3.15
  -7 -11  -8  126.80    9.52
  -7 -11  -8  143.61   10.14
  -7 -11  -8  146.15   10.74
  -7 -11  -9  197.47   11.71
  -7 -11  -9  190.74   11.45
  -7 -11  -9  209.74   12.20
  -7 -11 -10   14.04    2.61
  -7 -12   5  125.05    7.45
  -7 -12   4   23.24    3.32
  -7 -12   3   39.09    4.95
  -7 -12   2  149.97   10.54
  -7 -12   1    7.23    2.40
  -7 -12   0  193.79   13.01
  -7 -12   0  175.82   10.66
  -7 -12   0  199.40   12.90
  -7 -12  -1   95.99    7.78
  -7 -12  -1  111.26    9.45
  -7 -12  -2  171.96   11.07
  -7 -12  -2  180.55   12.64
  -7 -12  -3  184.00   11.17
  -7 -12  -3  180.79   12.56
  -7 -12  -3  169.59   11.07
  -7 -12  -4    0.62    1.51
  -7 -12  -4    3.14    1.58
  -7 -12  -5  214.42   12.46
  -7 -12  -5  217.40   13.47
  -7 -12  -6    4.34    1.88
  -7 -12  -6    1.32    1.63
  -7 -12  -7  112.25    8.17
  -7 -12  -7  112.00    8.61
  -7 -12  -8  197.51   10.85
  -7 -12  -8  192.03   11.07
  -7 -12  -9   31.08    3.62
  -7 -13   3   95.87    6.10
  -7 -13   2    2.99    1.24
  -7 -13   1   88.77    6.78
  -7 -13   0   39.95    4.73
  -7 -13  -1   42.11    4.89
  -7 -13  -2  116.91    8.53
  -7 -13  -3   -0.15    1.23
  -7 -13  -3    1.08    1.22
  -7 -13  -4  103.42    7.03
  -7 -13  -4  103.44    7.85
  -7 -13  -5   56.36    5.01
  -7 -13  -5   68.29    6.06
  -7 -13  -6   55.30    4.85
  -7 -13  -6   62.31    5.55
  -7 -13  -7  100.79    6.47
  -7 -13  -7   98.45    6.60
  -7 -14  -1   49.94    4.17
  -7 -14  -2    2.25    1.18
  -7 -14  -3  157.48    8.28
   8 -11  -1   23.37    3.41
   8 -10  -5  140.37    9.56
   8 -10  -4   -0.23    1.37
   8 -10  -3   87.47    8.22
   8 -10  -2  124.44   10.04
   8 -10  -2  106.93    7.17
   8 -10  -1   53.85    6.78
   8 -10  -1   50.95    4.97
   8 -10   0  139.70   10.78
   8 -10   0  138.98    8.81
   8 -10   1    2.73    2.06
   8 -10   1    3.90    1.58
   8 -10   2   80.65    7.43
   8 -10   2   79.57    6.29
   8 -10   3   42.22    5.10
   8 -10   3   51.19    4.61
  -8  10  -4   21.54    2.99
   8 -10   4   25.86    2.89
   8  -9  -7   27.26    3.29
   8  -9  -7   32.76    4.43
   8  -9  -6  102.03    7.10
   8  -9  -6  107.13    9.14
   8  -9  -5   53.67    5.25
   8  -9  -5   51.54    6.81
   8  -9  -4  128.43   11.38
   8  -9  -3  127.76   11.62
   8  -9  -3  114.42    8.09
   8  -9  -2    8.69    3.69
   8  -9  -2    9.53    2.52
   8  -9  -1  234.79   16.53
   8  -9  -1  210.22   12.76
   8  -9   0    4.39    2.47
   8  -9   0    0.95    1.11
   8  -9   1  142.26   12.56
   8  -9   1  150.90   10.63
   8  -9   2   61.79    7.92
   8  -9   2   74.31    7.10
   8  -9   3   18.51    4.02
   8  -9   3   24.47    3.83
   8  -9   4   89.04    8.34
   8  -9   4  101.35    7.65
  -8   9  -5    1.96    1.74
   8  -9   5   -1.68    1.42
  -8   9  -6   85.88    6.24
   8  -8  -9   91.50    6.99
   8  -8  -8    1.44    1.34
   8  -8  -7  155.25   11.82
   8  -8  -6   38.87    6.27
   8  -8  -5   74.69    9.04
   8  -8  -4   52.48    8.09
   8  -8  -3    2.80    2.50
   8  -8  -3    3.56    1.37
   8  -8  -2  173.70   15.39
   8  -8  -2  161.75   11.73
   8  -8  -1   -1.49    2.34
   8  -8  -1    3.42    1.56
   8  -8   0  174.01   15.52
   8  -8   0  179.32   13.03
   8  -8   1  187.63   16.00
   8  -8   2   32.06    6.43
   8  -8   3  133.35   12.48
   8  -8   3  140.14   11.02
   8  -8   4    7.18    3.20
   8  -8   4    5.33    2.24
   8  -8   5   64.84    7.31
   8  -8   5   74.32    6.88
  -8   8  -6   76.63    7.06
   8  -8   6   76.56    6.29
  -8   8  -7   39.37    4.46
   8  -8   7   33.45    3.33
   8  -7 -10  120.67    8.10
   8  -7  -9    7.37    2.37
   8  -7  -8  129.86   10.86
   8  -7  -7   72.26    8.72
   8  -7  -6   29.18    5.90
   8  -7  -5   88.00   10.79
   8  -7  -4   -3.37    2.95
   8  -7  -3  150.61   14.73
   8  -7  -3   98.81    9.21
   8  -7  -2   35.01    7.66
   8  -7  -1   64.02    9.90
   8  -7   0  190.47   17.94
  -8   7  -1    6.36    2.79
   8  -7   1    3.85    3.42
  -8   7  -2  193.91   13.59
   8  -7   2  155.70   15.02
  -8   7  -3   34.38    5.48
   8  -7   3   24.41    6.03
  -8   7  -4  214.17   13.96
   8  -7   4  191.18   15.60
  -8   7  -5   81.36    7.92
   8  -7   5   68.65    8.61
  -8   7  -6   32.66    4.62
   8  -7   6   32.14    4.70
  -8   7  -7  105.10    8.48
  -8   7  -7  122.70    8.67
   8  -7   7   94.74    7.38
  -8   7  -8    2.11    1.08
  -8   7  -8    8.12    2.21
  -8   7  -9   53.63    4.44
   8  -6 -10   16.68    3.40
   8  -6  -9  100.66    9.37
   8  -6  -8  100.00   10.22
   8  -6  -7   22.07    5.91
   8  -6  -6  253.81   18.98
   8  -6  -5    7.38    3.36
   8  -6  -4  169.00   16.30
   8  -6  -3  134.52   14.64
  -8   6   2  108.36   10.14
   8  -6  -2   89.84   11.89
  -8   6   1  309.28   18.78
   8  -6  -1  267.97   21.59
  -8   6   0    3.83    2.51
   8  -6   0    5.42    4.12
  -8   6  -1  167.89   13.37
   8  -6   1  129.32   14.48
  -8   6  -2   62.47    7.96
   8  -6   2   53.40    9.02
  -8   6  -3  241.56   16.47
   8  -6   3  194.89   17.23
  -8   6  -4  174.12   13.68
   8  -6   4  166.99   15.14
  -8   6  -5   10.24    3.66
   8  -6   5   -1.88    3.57
  -8   6  -6  422.32   21.81
   8  -6   6  402.57   22.76
  -8   6  -7   26.19    4.68
  -8   6  -8   84.93    7.39
  -8   6  -8   83.11    7.70
  -8   6  -9   49.44    5.23
  -8   6 -10   14.89    2.50
   8  -5 -11   53.19    5.51
   8  -5 -10  116.54    9.72
   8  -5  -9  226.50   15.54
   8  -5  -8   -1.77    2.82
   8  -5  -7  304.19   20.86
  -8   5   6    0.21    1.86
   8  -5  -6   -4.57    3.46
  -8   5   5  278.92   17.24
   8  -5  -5  257.85   20.56
  -8   5   4  229.92   15.84
   8  -5  -4  194.43   17.82
  -8   5   3   86.23    9.45
   8  -5  -3   84.01   11.57
  -8   5   2  317.67   19.94
   8  -5  -2  299.07   22.78
  -8   5   1   12.95    3.93
   8  -5  -1   18.01    5.67
  -8   5   0  435.10   24.35
   8  -5   0  395.36   26.52
  -8   5  -1  147.68   13.23
   8  -5   1  142.41   15.17
  -8   5  -2   25.13    5.74
   8  -5   2   22.09    6.19
  -8   5  -3  316.58   20.60
   8  -5   3  301.18   22.09
  -8   5  -4    5.09    3.32
   8  -5   4    2.59    2.75
  -8   5  -5  220.43   16.65
   8  -5   5  252.98   18.55
  -8   5  -6   71.47    9.07
  -8   5  -7   76.45    8.74
  -8   5  -8  227.44   13.89
  -8   5  -8  240.18   15.38
  -8   5  -9   41.44    5.70
  -8   5 -10  112.88    8.51
  -8   5 -11   15.67    2.63
   8  -4 -11   99.43    8.12
   8  -4 -10  171.13   12.57
  -8   4   9    1.36    1.35
   8  -4  -9   -2.32    2.09
  -8   4   8  311.38   17.29
   8  -4  -8  325.84   21.33
  -8   4   7   28.01    4.83
   8  -4  -7   27.35    6.55
  -8   4   6  155.37   12.77
   8  -4  -6  155.92   15.47
  -8   4   5  302.72   19.39
   8  -4  -5  319.49   22.96
  -8   4   4   74.72    9.28
   8  -4  -4   70.53   10.53
  -8   4   3  500.09   26.72
   8  -4  -3  471.87   29.30
  -8   4   2    8.42    3.60
   8  -4  -2    8.18    4.37
  -8   4   1  304.52   20.18
   8  -4  -1  272.33   21.42
  -8   4   0  160.13   14.35
   8  -4   0  169.64   36.28
   8  -4   0  167.92   16.47
   8  -4   1    5.15    8.55
  -8   4  -1   14.02    4.79
   8  -4   1    9.75    4.43
  -8   4  -2  478.83   27.00
   8  -4   2  469.01   28.55
  -8   4  -3   24.58    5.81
   8  -4   3   15.39    4.52
  -8   4  -4  285.77   19.97
  -8   4  -5  218.76   17.04
  -8   4  -6  277.00   19.18
  -8   4  -7  155.53   13.58
  -8   4  -8    1.02    2.03
  -8   4  -9  291.34   17.55
  -8   4 -10   33.19    5.10
  -8   4 -11   65.41    6.15
  -8   4 -12   86.66    6.07
   8  -3 -12   21.11    3.10
  -8   3  11  136.71    8.14
   8  -3 -11  142.87   10.44
  -8   3  10   26.85    3.99
   8  -3 -10   31.43    5.57
  -8   3   9  268.30   15.80
   8  -3  -9  301.67   19.26
  -8   3   8   77.79    8.51
   8  -3  -8   83.78   10.42
  -8   3   7   74.68    8.96
   8  -3  -7   67.67    9.68
  -8   3   6  386.52   22.78
   8  -3  -6  382.30   25.15
  -8   3   5   39.15    6.95
   8  -3  -5   36.43    7.38
  -8   3   4  448.90   25.74
   8  -3  -4  450.15   27.89
  -8   3   3  273.24   19.46
   8  -3  -3  302.97   22.07
   8  -3  -3  257.14   46.76
  -8   3   2  650.21   32.40
   8  -3  -2  626.47   34.35
   8  -3  -2  645.50   73.66
  -8   3   1  208.71   16.75
   8  -3  -1  214.37   18.46
   8  -3  -1  261.06   46.39
  -8   3   0  269.53   19.30
   8  -3   0  238.40   19.50
   8  -3   0  294.10   48.20
  -8   3  -1  615.73   31.65
   8  -3   1  604.53   33.14
   8  -3   1  702.35   75.20
  -8   3  -2   43.36    7.72
   8  -3   2   58.59   20.71
  -8   3  -3  437.63   25.90
   8  -3   3  447.67   58.57
  -8   3  -4  129.19   13.04
  -8   3  -5  460.07   26.62
  -8   3  -6  328.46   21.75
  -8   3  -7    6.65    3.73
  -8   3  -8  443.47   24.71
  -8   3  -9   39.30    6.57
  -8   3 -10   86.05    8.74
  -8   3 -11  101.79    8.66
  -8   3 -12    2.02    1.24
   8  -2 -12   84.08    6.78
  -8   2  11    3.32    1.24
   8  -2 -11    6.20    2.62
   8  -2 -10   83.26    8.88
   8  -2  -9  250.63   17.73
   8  -2  -8  350.14   22.65
   8  -2  -7  191.77   16.50
   8  -2  -6   63.73    9.68
   8  -2  -5  327.55   22.93
  -8   2   4  140.49   13.74
   8  -2  -4  156.36   15.20
   8  -2  -4  133.66   33.14
  -8   2   3  296.85   20.49
   8  -2  -3  291.89   21.46
   8  -2  -3  282.86   47.57
  -8   2   2  291.67   20.22
   8  -2  -2  266.12   46.27
   8  -2  -2  286.79   21.15
  -8   2   1    2.44    3.01
   8  -2  -1   11.82    5.09
   8  -2   0 1180.03   97.46
  -8   2   0 1103.99   46.85
   8  -2   1   31.50   14.37
  -8   2  -1   20.54    5.28
   8  -2   2  104.11   27.73
  -8   2  -2  112.59   12.25
   8  -2   3   92.27   23.87
  -8   2  -3  104.65   12.05
   8  -2   4  186.15   36.63
  -8   2  -4  169.92   15.21
   8  -2   5  211.02   38.31
  -8   2  -5  216.30   17.18
  -8   2  -6   93.21   11.04
  -8   2  -7  282.17   19.90
  -8   2  -8  208.64   16.44
  -8   2  -9   14.95    4.51
  -8   2  -9   18.26    4.09
  -8   2 -10   93.11    9.57
  -8   2 -11   23.99    4.37
  -8   2 -12   81.80    7.08
  -8   2 -13   11.20    2.23
  -8   1  12   19.44    2.76
   8  -1 -12   28.59    3.82
   8  -1 -11  245.59   14.69
   8  -1 -10   72.86    8.34
   8  -1  -9   61.05    8.23
   8  -1  -8  218.53   17.20
   8  -1  -7   37.66    7.36
   8  -1  -6  315.56   22.17
   8  -1  -5   34.79    6.92
   8  -1  -4   -2.60   14.58
   8  -1  -4    1.80    2.70
   8  -1  -3  753.78   37.19
   8  -1  -3  801.95   80.58
  -8   1   2  167.09   14.99
   8  -1  -2  163.26   15.03
   8  -1  -2  206.05   40.48
   8  -1  -1  220.50   41.14
  -8   1   1  238.41   18.06
   8  -1   0   24.71   11.78
  -8   1   0   32.08    6.15
   8  -1   1  180.25   35.59
  -8   1  -1  167.50   15.13
   8  -1   2  262.25   43.13
  -8   1  -2  240.99   18.27
   8  -1   3    0.07   12.45
  -8   1  -3    2.73    3.77
   8  -1   4  103.61   26.87
  -8   1  -4   93.78   11.05
   8  -1   5   21.52   11.78
   8  -1   5   31.48   13.27
  -8   1  -5   36.01    7.02
   8  -1   6  282.45   44.79
   8  -1   6  252.75   36.66
  -8   1  -6  283.83   20.07
  -8   1  -7  119.76   12.46
  -8   1  -8   32.41    5.12
  -8   1  -8   19.39    4.80
  -8   1  -8   20.69    4.15
  -8   1  -9  163.07   13.89
  -8   1  -9  158.92   12.63
  -8   1 -10    0.26    2.17
  -8   1 -10   -1.71    1.47
  -8   1 -11  185.05   12.73
  -8   1 -11  186.66   12.11
  -8   1 -12   32.85    4.56
   8  -1  12   26.74    4.42
   8  -1  13   49.08    4.79
  -8   1 -13   66.05    5.41
   8   0 -12  106.14    7.63
   8   0 -11   92.31    8.49
   8   0 -10    7.41    2.60
   8   0  -9  370.88   21.94
   8   0  -8   30.08    6.37
   8   0  -7   80.15   10.29
   8   0  -6  120.68   12.96
   8   0  -5  323.60   22.04
   8   0  -5  318.73   50.38
   8   0  -4  659.37   33.52
   8   0  -4  599.14   69.52
   8   0  -3   99.08   26.25
   8   0  -2  103.82   29.53
  -8   0   2   98.61   11.31
   8   0  -1  750.78   75.11
  -8   0   1  751.53   36.08
   8   0   0  597.33   65.48
  -8   0   0  614.19   31.52
   8   0   1  110.00   27.17
  -8   0  -1  115.28   12.01
   8   0   2   23.65   10.61
  -8   0  -2   18.32    5.29
   8   0   3  659.50   67.71
  -8   0  -3  713.20   34.64
   8   0   4  129.20   29.31
  -8   0  -4  150.40   14.11
   8   0   5   24.90   13.84
   8   0   5   42.64   13.41
  -8   0  -5   36.28    6.84
   8   0   6   55.51   19.33
   8   0   6   66.84   17.89
  -8   0  -6   73.67    9.71
  -8   0  -7   -0.01    2.54
  -8   0  -7    3.64    3.07
  -8   0  -8  364.12   20.40
  -8   0  -8  374.04   22.94
  -8   0  -8  373.34   21.41
  -8   0  -9    4.96    1.74
  -8   0  -9   -0.97    2.36
  -8   0  -9   -1.01    2.26
  -8   0 -10  286.37   17.90
  -8   0 -10  279.73   15.49
  -8   0 -10  264.19   16.91
  -8   0 -11   77.36    8.10
  -8   0 -11   92.38    8.73
  -8   0 -12   36.02    4.94
  -8   0 -12   33.17    4.96
   8   0  13   92.20    7.73
  -8   0 -13  111.34    7.46
   8   1 -12  129.75    8.20
  -8  -1  12  106.05    6.38
   8   1 -11   14.00    3.00
  -8  -1  11   14.93    2.89
   8   1 -10  139.18   11.40
   8   1  -9   56.93    7.78
   8   1  -8  216.39   16.63
   8   1  -7  202.30   16.55
   8   1  -6   88.02   10.72
   8   1  -5  196.93   38.75
   8   1  -5  242.57   18.39
   8   1  -4   33.86   14.64
  -8  -1   4   28.62    5.41
   8   1  -3  321.16   47.65
  -8  -1   3  328.84   19.25
   8   1  -2   92.85   25.36
  -8  -1   2  129.05   11.08
   8   1  -1   46.29   16.79
  -8  -1   1   75.55   10.03
   8   1   0  284.43   44.16
  -8  -1   0  290.44   20.03
   8   1   1    9.31    9.39
  -8  -1  -1   27.47    5.55
   8   1   2  934.49   80.07
  -8  -1  -2  992.89   42.52
   8   1   3   -3.77    8.54
  -8  -1  -3    4.28    2.09
   8   1   4  153.35   31.55
  -8  -1  -4  180.12   15.21
   8   1   5  581.51   61.74
   8   1   5  521.48   52.16
  -8  -1  -5  600.01   30.53
   8   1   6   32.72   18.39
   8   1   6   46.78   15.39
  -8  -1  -6   37.94    6.80
   8   1   7   60.78   21.21
  -8  -1  -7   71.03    8.48
  -8  -1  -7   78.85    9.70
  -8  -1  -8   57.64    8.04
  -8  -1  -8   75.10    8.65
  -8  -1  -9   91.66   10.07
  -8  -1  -9   96.75   10.29
  -8  -1 -10  226.46   15.62
  -8  -1 -10  242.22   14.77
  -8  -1 -10  214.61   15.44
  -8  -1 -11   33.51    5.32
  -8  -1 -11   26.59    5.12
  -8  -1 -12   94.11    8.00
  -8  -1 -12   97.09    8.58
  -8  -1 -13    9.15    2.11
   8   1  13    4.54    1.85
  -8  -1 -13    6.85    2.10
   8   1  14   57.41    5.21
  -8  -2  12    5.43    1.39
   8   2 -11  192.56   11.58
  -8  -2  11  163.70    9.84
   8   2 -10   71.13    7.69
   8   2  -9  188.06   14.22
   8   2  -8  199.73   15.24
   8   2  -8  168.43   15.06
   8   2  -7    4.59    2.74
   8   2  -7   -1.71    3.63
   8   2  -6  145.94   13.42
   8   2  -6  118.01   13.17
   8   2  -5   30.97    6.84
  -8  -2   4  264.82   17.64
  -8  -2   3  140.49   12.22
   8   2  -2  123.69   28.59
  -8  -2   2  109.94   10.60
   8   2  -1  661.85   66.22
  -8  -2   1  648.23   32.27
  -8  -2   1  627.77   29.29
  -8  -2   0    8.97    4.26
  -8  -2   0    8.85    2.92
   8   2   1  345.59   45.46
  -8  -2  -1  329.14   21.01
  -8  -2  -1  305.44   18.36
   8   2   2  149.30   28.92
  -8  -2  -2  181.21   15.05
  -8  -2  -2  174.58   13.24
   8   2   3  169.90   31.69
   8   2   3  139.79   26.67
  -8  -2  -3  162.50   14.02
  -8  -2  -3  139.89   11.69
   8   2   4  855.95   73.66
  -8  -2  -4  928.19   40.40
   8   2   5   15.20   11.88
   8   2   5   36.12   13.37
  -8  -2  -5   30.11    6.05
  -8  -2  -5   28.90    5.52
   8   2   6  251.41   34.12
  -8  -2  -6  301.00   18.80
  -8  -2  -6  233.10   17.64
  -8  -2  -6  287.09   18.74
   8   2   7  196.83   31.30
  -8  -2  -7  265.93   17.35
  -8  -2  -7  199.22   15.92
  -8  -2  -8  160.36   13.84
  -8  -2  -8  215.62   15.27
  -8  -2  -9   68.87    8.45
  -8  -2  -9   97.32    9.74
  -8  -2 -10    6.97    2.76
  -8  -2 -10    7.85    3.19
  -8  -2 -10    9.99    3.68
  -8  -2 -11  348.23   18.36
  -8  -2 -11  348.03   18.00
  -8  -2 -11  348.20   19.94
  -8  -2 -12   54.89    6.65
  -8  -2 -13  123.69    9.00
   8   2  14   92.32    7.19
  -8  -3  11   35.29    4.16
   8   3 -11   33.82    4.23
   8   3 -10   44.35    5.63
  -8  -3  10   41.98    5.17
   8   3  -9  341.16   18.91
   8   3  -9  285.35   18.78
   8   3  -8   50.95    7.22
   8   3  -8   37.68    6.77
   8   3  -7  326.26   20.04
   8   3  -7  266.04   19.80
   8   3  -6  194.92   16.69
   8   3  -5  389.28   24.61
   8   3  -4  380.76   23.88
  -8  -3   4  358.17   21.39
  -8  -3   3   28.07    5.64
  -8  -3   2  419.01   23.17
  -8  -3   1   36.94    6.14
  -8  -3   0  176.45   14.95
  -8  -3   0  192.26   14.41
  -8  -3  -1  502.95   26.87
  -8  -3  -1  496.71   25.32
   8   3   2  103.87   21.95
  -8  -3  -2  129.36   12.37
  -8  -3  -2  143.62   12.11
  -8  -3  -3  678.21   31.70
  -8  -3  -3  653.80   29.94
   8   3   4   31.11   14.10
  -8  -3  -4   35.98    6.08
  -8  -3  -4   36.53    6.10
  -8  -3  -4   30.59    5.55
  -8  -3  -5  649.84   30.11
  -8  -3  -5  629.29   29.02
  -8  -3  -5  648.45   30.16
  -8  -3  -6  157.53   13.39
  -8  -3  -6  121.68   11.99
  -8  -3  -6  156.09   13.48
  -8  -3  -6  158.97   12.84
  -8  -3  -7  104.44   10.60
  -8  -3  -7   81.35    9.54
  -8  -3  -7   77.17    9.50
  -8  -3  -8  289.59   18.82
  -8  -3  -9    5.63    3.05
  -8  -3 -10  431.46   22.42
  -8  -3 -11   43.76    5.96
  -8  -3 -11   52.54    7.23
  -8  -3 -12   53.73    5.78
  -8  -3 -12   60.75    7.11
  -8  -3 -13  179.31   11.26
  -8  -3 -14    6.09    1.81
  -8  -4  11   33.83    3.79
   8   4 -10  114.37    8.55
  -8  -4  10  103.84    8.25
   8   4  -9   -0.28    1.62
  -8  -4   9   -1.16    1.68
   8   4  -9   -0.96    1.93
   8   4  -8  172.90   12.85
  -8  -4   8  156.98   12.37
   8   4  -8  163.58   13.68
  -8  -4   7  143.31   12.38
   8   4  -7  138.31   13.09
  -8  -4   6  156.64   13.47
   8   4  -6  142.08   13.54
  -8  -4   5  231.26   16.73
   8   4  -5  224.52   17.63
  -8  -4   4   14.82    3.86
   8   4  -4   15.55    4.53
  -8  -4   3  470.38   25.54
  -8  -4   2   15.59    4.92
  -8  -4   1   72.58    9.19
  -8  -4   0  262.07   18.20
  -8  -4   0  256.22   17.54
  -8  -4   0  268.04   17.68
   8   4   1   42.90   14.63
  -8  -4  -1   57.38    8.02
  -8  -4  -1   54.92    7.68
  -8  -4  -2  908.46   37.79
  -8  -4  -2  940.28   37.89
  -8  -4  -3   30.73    5.69
  -8  -4  -3   37.94    6.51
   8   4   4  340.30   45.13
  -8  -4  -4  333.15   20.46
  -8  -4  -4  322.25   19.89
  -8  -4  -4  326.25   20.34
   8   4   5  195.75   33.91
  -8  -4  -5  183.85   14.47
  -8  -4  -5  164.53   13.67
  -8  -4  -5  164.90   14.07
  -8  -4  -6   35.76    6.59
  -8  -4  -6   42.40    6.79
  -8  -4  -6   39.17    6.67
  -8  -4  -7  587.67   29.31
  -8  -4  -7  596.19   30.03
  -8  -4  -7  561.57   28.16
  -8  -4  -8    3.49    2.53
  -8  -4  -8    3.39    3.46
  -8  -4  -9   41.82    6.72
  -8  -4 -10   71.17    8.30
  -8  -4 -11  208.25   13.83
  -8  -4 -12   94.87    8.04
  -8  -4 -12  104.96    9.41
  -8  -4 -13    1.18    1.04
  -8  -4 -13    0.74    1.69
  -8  -4 -14   90.85    6.47
  -8  -5  11   67.81    5.00
  -8  -5  10   14.24    2.83
   8   5  -9  152.20   11.55
  -8  -5   9  147.05   10.56
  -8  -5   8   24.38    4.75
   8   5  -8   23.19    4.62
  -8  -5   7   55.09    7.41
   8   5  -7   51.42    7.58
  -8  -5   6   90.50   10.16
   8   5  -6   96.72   10.53
  -8  -5   5    5.57    2.65
   8   5  -5    5.49    2.35
  -8  -5   4  444.47   23.30
  -8  -5   4  413.68   23.84
   8   5  -4  411.30   24.22
  -8  -5   3  118.86   11.25
  -8  -5   3  103.28   11.22
  -8  -5   2  107.49   10.99
  -8  -5   2  139.11   12.70
  -8  -5   1  506.94   26.83
  -8  -5   1  533.92   27.44
   8   5   0  104.31   24.72
  -8  -5   0   73.29    9.11
  -8  -5   0   75.96    9.15
  -8  -5   0   83.80    9.23
  -8  -5  -1  204.49   15.14
   8   5   1  271.47   39.96
  -8  -5  -1  252.76   17.59
  -8  -5  -1  274.08   18.08
  -8  -5  -1  257.40   16.99
   8   5   2  177.36   32.52
  -8  -5  -2  210.31   15.16
  -8  -5  -2  207.44   15.45
  -8  -5  -2  181.12   14.45
   8   5   3  220.62   35.86
  -8  -5  -3  220.82   15.68
  -8  -5  -3  191.16   15.06
  -8  -5  -3  191.51   15.09
   8   5   4  351.54   46.41
  -8  -5  -4  387.60   22.12
  -8  -5  -4  364.85   21.75
  -8  -5  -4  348.28   21.66
   8   5   5   29.74   13.50
  -8  -5  -5   53.76    7.62
  -8  -5  -5   44.05    7.31
  -8  -5  -5   51.48    7.66
  -8  -5  -6  594.34   29.31
  -8  -5  -6  562.52   28.48
  -8  -5  -6  558.75   29.29
  -8  -5  -7   32.72    5.95
  -8  -5  -7   45.87    7.07
  -8  -5  -7   36.22    6.59
  -8  -5  -8  230.67   16.55
  -8  -5  -8  221.51   16.81
  -8  -5  -9  136.51   12.16
  -8  -5  -9  123.99   12.03
  -8  -5 -10  133.17   11.61
  -8  -5 -11  131.72   10.73
  -8  -5 -12    8.82    2.86
  -8  -5 -12    2.77    1.85
  -8  -5 -13  211.58   11.13
  -8  -5 -13  219.14   12.32
  -8  -5 -14   25.86    3.17
  -8  -6  10   87.30    6.24
   8   6  -9   57.96    6.17
  -8  -6   9   59.26    6.01
  -8  -6   8    0.44    1.41
   8   6  -8    0.62    1.29
  -8  -6   7  294.90   17.52
   8   6  -7  296.80   17.99
  -8  -6   6    2.12    2.47
  -8  -6   6    0.42    1.79
   8   6  -6    0.94    1.49
  -8  -6   5  217.91   15.08
  -8  -6   5  210.35   15.73
   8   6  -5  205.30   15.48
  -8  -6   4  237.40   16.57
  -8  -6   4  243.56   17.22
  -8  -6   3  117.12   11.42
  -8  -6   3  119.73   11.84
  -8  -6   2  206.44   15.85
  -8  -6   2  225.92   16.61
  -8  -6   1   45.95    7.34
  -8  -6   1   49.28    7.56
   8   6   0   51.23   18.82
  -8  -6   0   62.84    8.61
  -8  -6   0   51.13    7.81
   8   6   1  274.74   41.54
  -8  -6  -1  257.92   18.54
  -8  -6  -1  279.82   18.48
  -8  -6  -1  253.35   17.64
   8   6   2  224.41   36.61
  -8  -6  -2  206.22   15.24
  -8  -6  -2  282.82   18.46
  -8  -6  -2  243.85   17.24
   8   6   3  119.24   27.23
  -8  -6  -3  134.68   12.14
  -8  -6  -3  140.86   12.75
  -8  -6  -3  134.17   12.59
   8   6   4    2.70    9.67
  -8  -6  -4    3.65    2.73
  -8  -6  -4    5.34    3.18
  -8  -6  -4    6.48    3.29
  -8  -6  -5  463.09   25.29
  -8  -6  -5  479.48   25.93
  -8  -6  -5  488.71   26.47
  -8  -6  -6   46.21    7.28
  -8  -6  -6   38.78    6.71
  -8  -6  -6   37.24    6.97
  -8  -6  -7  304.27   19.55
  -8  -6  -7  302.55   19.94
  -8  -6  -7  285.46   18.99
  -8  -6  -8  244.78   17.20
  -8  -6  -8  258.43   18.03
  -8  -6  -9    5.87    3.10
  -8  -6  -9    4.75    2.11
  -8  -6 -10  261.28   16.74
  -8  -6 -11    6.30    2.51
  -8  -6 -12  160.68   10.65
  -8  -6 -13   43.70    4.51
  -8  -6 -13   47.05    5.09
  -8  -6 -14   11.14    1.97
  -8  -7   9   -0.42    1.10
  -8  -7   8  126.63    9.20
   8   7  -8  126.54    9.14
  -8  -7   7   27.47    4.13
  -8  -7   7   29.75    4.86
   8   7  -7   30.43    4.77
  -8  -7   6  168.70   12.61
  -8  -7   6  120.54   10.60
  -8  -7   5  123.84   11.03
  -8  -7   5  141.40   12.15
  -8  -7   4   52.39    7.40
  -8  -7   4   57.65    7.73
  -8  -7   3  139.89   12.56
  -8  -7   3  156.65   13.38
  -8  -7   2  110.62   11.35
  -8  -7   2   97.97   10.55
  -8  -7   1  148.51   13.44
  -8  -7   1  153.02   13.41
  -8  -7   0   32.55    6.36
  -8  -7   0   38.32    6.64
  -8  -7  -1   74.27    9.38
  -8  -7  -1   72.60    9.26
  -8  -7  -1   71.54    9.20
  -8  -7  -2  187.35   15.10
  -8  -7  -2  176.44   14.54
  -8  -7  -3   28.59    5.44
  -8  -7  -3   37.45    6.50
  -8  -7  -3   30.68    6.07
  -8  -7  -4  160.89   13.49
  -8  -7  -4  179.20   14.62
  -8  -7  -4  188.72   15.18
  -8  -7  -5   40.45    6.57
  -8  -7  -5   25.96    5.65
  -8  -7  -5   36.35    6.47
  -8  -7  -6   67.45    8.57
  -8  -7  -6   72.75    9.34
  -8  -7  -6   54.59    7.83
  -8  -7  -7  334.25   20.55
  -8  -7  -7  347.73   19.23
  -8  -7  -7  350.24   21.51
  -8  -7  -7  341.48   20.76
  -8  -7  -8   43.09    6.63
  -8  -7  -8   40.14    6.88
  -8  -7  -9  277.17   17.75
  -8  -7  -9  284.50   18.26
  -8  -7 -10    2.27    2.00
  -8  -7 -11  102.62    8.97
  -8  -7 -12   60.55    6.10
  -8  -7 -13   12.75    2.24
  -8  -7 -13   10.54    2.06
  -8  -8   8   31.27    3.58
  -8  -8   8   32.05    3.81
  -8  -8   7   79.47    6.89
  -8  -8   7   88.02    7.50
  -8  -8   6   93.60    8.27
  -8  -8   6   91.62    8.36
  -8  -8   5    1.33    1.64
  -8  -8   5    2.54    2.17
  -8  -8   4  402.25   21.99
  -8  -8   4  418.41   22.21
  -8  -8   3  214.21   15.59
  -8  -8   3  200.32   14.88
  -8  -8   2  258.32   18.05
  -8  -8   2  299.60   18.75
  -8  -8   1  323.93   20.74
  -8  -8   1  335.51   20.60
  -8  -8   0    2.17    2.71
  -8  -8   0    3.96    1.76
  -8  -8  -1  512.97   27.51
  -8  -8  -1  481.40   25.97
  -8  -8  -1  473.44   25.77
  -8  -8  -2   74.45    9.19
  -8  -8  -2   71.59    9.15
  -8  -8  -3  543.89   27.98
  -8  -8  -3  526.26   27.70
  -8  -8  -4  190.37   14.96
  -8  -8  -4  195.04   15.13
  -8  -8  -5  144.21   12.45
  -8  -8  -5  128.70   12.11
  -8  -8  -5  135.46   12.71
  -8  -8  -6  270.24   17.68
  -8  -8  -6  271.98   18.14
  -8  -8  -6  280.69   18.86
  -8  -8  -7    2.86    2.47
  -8  -8  -7    0.91    2.05
  -8  -8  -7    0.23    2.45
  -8  -8  -7    2.58    2.40
  -8  -8  -8  342.83   20.45
  -8  -8  -8  357.77   20.74
  -8  -8  -9   18.33    3.90
  -8  -8  -9   19.61    4.33
  -8  -8 -10  121.71   10.05
  -8  -8 -11  112.60    8.92
  -8  -8 -12    4.34    1.57
  -8  -8 -13  120.83    7.77
  -8  -8 -13  128.73    7.33
  -8  -9   7  180.10    9.82
  -8  -9   7  177.32    9.69
  -8  -9   6    2.75    1.86
  -8  -9   6    3.51    1.90
  -8  -9   5  264.19   15.31
  -8  -9   5  283.07   15.29
  -8  -9   4   25.71    4.67
  -8  -9   4   31.26    5.07
  -8  -9   3  439.23   23.17
  -8  -9   3  452.40   22.56
  -8  -9   2  356.70   20.95
  -8  -9   2  354.93   19.98
  -8  -9   1   32.80    6.09
  -8  -9   1   34.94    5.96
  -8  -9   0  403.62   23.23
  -8  -9   0  386.95   22.02
  -8  -9  -1   39.63    6.76
  -8  -9  -1   48.10    7.25
  -8  -9  -1   30.16    5.64
  -8  -9  -2  476.78   24.87
  -8  -9  -2  431.92   24.23
  -8  -9  -3  461.99   24.71
  -8  -9  -3  464.10   25.18
  -8  -9  -4  139.53   12.26
  -8  -9  -4  154.46   13.44
  -8  -9  -5  106.07   10.20
  -8  -9  -5  130.13   11.85
  -8  -9  -5  130.13   11.93
  -8  -9  -6    0.83    1.58
  -8  -9  -6   -0.81    1.92
  -8  -9  -6   -0.78    2.17
  -8  -9  -6   -0.66    2.31
  -8  -9  -7  171.42   13.05
  -8  -9  -7  187.41   12.52
  -8  -9  -7  200.60   14.68
  -8  -9  -8   48.60    6.50
  -8  -9  -8   46.08    6.71
  -8  -9  -9   53.87    6.50
  -8  -9  -9   54.46    6.74
  -8  -9 -10  244.47   14.15
  -8  -9 -11   18.20    3.21
  -8  -9 -12  158.23    8.80
  -8  -9 -12  140.16    8.75
  -8 -10   6  169.48    9.42
  -8 -10   6  159.68    8.57
  -8 -10   5   21.39    3.56
  -8 -10   5   19.03    3.08
  -8 -10   4  121.08    9.51
  -8 -10   4  114.72    8.57
  -8 -10   3   82.03    8.41
  -8 -10   3   85.73    8.02
  -8 -10   2   51.47    6.88
  -8 -10   2   49.52    6.27
  -8 -10   1  339.02   19.75
  -8 -10   1  337.56   18.46
  -8 -10   0   22.34    5.26
  -8 -10   0   18.80    4.38
  -8 -10   0   12.09    3.25
  -8 -10  -1  183.17   14.48
  -8 -10  -1  181.14   13.39
  -8 -10  -1  192.81   14.07
  -8 -10  -2  163.12   12.68
  -8 -10  -2  162.31   13.12
  -8 -10  -3   34.17    5.69
  -8 -10  -3   34.60    5.87
  -8 -10  -4   80.91    8.90
  -8 -10  -4   87.90    9.20
  -8 -10  -5    4.10    2.58
  -8 -10  -5    3.75    1.62
  -8 -10  -6  155.96   10.49
  -8 -10  -6  171.17   12.76
  -8 -10  -6  159.83   11.96
  -8 -10  -7   83.39    7.91
  -8 -10  -7   93.94    7.84
  -8 -10  -7   90.55    9.00
  -8 -10  -8   53.48    6.23
  -8 -10  -8   52.75    6.47
  -8 -10  -9  337.03   16.67
  -8 -10  -9  361.17   17.59
  -8 -10 -10    7.02    2.09
  -8 -10 -10    4.98    1.54
  -8 -10 -11  114.12    7.31
  -8 -11   5   38.77    3.95
  -8 -11   4   81.30    6.56
  -8 -11   4   65.90    5.19
  -8 -11   4   73.78    5.83
  -8 -11   3    1.71    1.66
  -8 -11   3    1.02    0.86
  -8 -11   2  118.72    9.49
  -8 -11   2  112.58    8.32
  -8 -11   2  115.29    8.93
  -8 -11   1   52.37    6.48
  -8 -11   1   42.64    5.53
  -8 -11   1   42.32    5.05
  -8 -11   0  142.80   10.27
  -8 -11   0  153.58   11.17
  -8 -11  -1  145.19   10.65
  -8 -11  -1  156.99   12.00
  -8 -11  -2   11.97    3.88
  -8 -11  -2    8.43    2.63
  -8 -11  -3  256.98   15.07
  -8 -11  -3  265.56   15.99
  -8 -11  -4   37.66    5.30
  -8 -11  -4   39.97    5.45
  -8 -11  -5  181.72   12.66
  -8 -11  -5  172.25   11.80
  -8 -11  -6  154.67    9.72
  -8 -11  -6  154.40   11.24
  -8 -11  -7   30.68    4.07
  -8 -11  -7   28.41    3.73
  -8 -11  -7   32.46    4.68
  -8 -11  -8  161.85    9.64
  -8 -11  -8  157.18   10.34
  -8 -11  -9    1.48    1.11
  -8 -12   3   56.75    4.68
  -8 -12   2   37.32    4.24
  -8 -12   1   52.82    4.60
  -8 -12   1   55.26    5.55
  -8 -12   0   91.76    6.74
  -8 -12   0   98.60    7.79
  -8 -12  -1   14.88    3.12
  -8 -12  -1   10.04    2.25
  -8 -12  -2  143.01   10.00
  -8 -12  -2  126.93    8.60
  -8 -12  -3   52.76    5.88
  -8 -12  -3   41.03    4.69
  -8 -12  -4  128.00    9.38
  -8 -12  -5   66.25    6.32
  -8 -12  -6   24.26    3.60
  -8 -12  -7   57.50    5.43
  -8 -12  -8    1.82    0.98
  -8 -13   0    0.49    0.70
  -8 -13  -1  155.63    9.04
  -8 -13  -2    3.20    1.21
  -8 -13  -3    9.88    1.96
  -8 -13  -4   61.24    5.28
  -8 -13  -5    1.16    0.71
  -8 -13  -6   66.11    5.03
   9  -9  -5    1.48    1.11
   9  -9  -4  176.16   10.89
   9  -9  -3    4.21    1.80
   9  -9  -2   61.32    6.54
   9  -9  -2   51.70    4.37
   9  -9  -1   73.87    7.33
   9  -9  -1   81.88    5.97
   9  -9   0   28.34    4.28
   9  -9   0   29.46    3.56
   9  -9   1  161.66   10.87
   9  -9   1  170.70    9.49
   9  -9   2    9.09    2.23
   9  -9   2   12.32    2.33
   9  -9   3   57.64    4.81
  -9   9  -4   34.37    3.60
   9  -9   4   37.30    3.46
   9  -8  -7   98.53    7.13
   9  -8  -6    3.59    1.46
   9  -8  -5   74.97    7.55
   9  -8  -4   16.24    3.90
   9  -8  -3   77.30    8.22
   9  -8  -3   61.26    5.22
   9  -8  -2   70.41    7.97
   9  -8  -2   65.37    6.05
   9  -8  -1   13.56    3.49
   9  -8  -1   21.26    3.43
   9  -8   0  163.49   12.61
   9  -8   0  155.58   10.40
   9  -8   1    7.22    2.86
   9  -8   1    4.66    2.00
   9  -8   2   69.67    7.49
   9  -8   2   81.16    7.15
   9  -8   3   31.75    4.45
   9  -8   3   40.89    4.90
   9  -8   4   20.91    3.39
   9  -8   4   25.97    3.62
   9  -8   5   95.58    6.57
   9  -7  -8   72.84    6.35
   9  -7  -7    4.33    1.82
   9  -7  -6  109.45    9.74
   9  -7  -5   38.63    5.99
   9  -7  -4   42.73    6.77
   9  -7  -3   86.96    9.89
   9  -7  -3   90.71    7.30
   9  -7  -2    5.87    2.92
   9  -7  -2    5.69    2.06
   9  -7  -1  192.06   15.18
   9  -7   0    3.65    2.05
   9  -7   1  144.05   12.91
  -9   7  -2  156.97   10.66
   9  -7   2  111.47   11.06
  -9   7  -3   23.83    3.85
   9  -7   3   21.92    4.50
  -9   7  -4  145.53    9.59
   9  -7   4  124.11   10.30
  -9   7  -5    4.55    1.37
   9  -7   5    5.80    2.20
  -9   7  -6   72.98    6.24
  -9   7  -6   74.98    5.95
   9  -7   6   70.48    5.90
  -9   7  -7   57.45    4.63
   9  -7   7   58.48    4.48
   9  -6  -9  148.40    9.26
   9  -6  -8    4.32    2.06
   9  -6  -7  159.28   12.07
   9  -6  -6   66.48    8.30
   9  -6  -5   26.07    5.85
   9  -6  -4  230.33   17.26
  -9   6   3    1.09    1.24
   9  -6  -3   -0.70    2.56
  -9   6   2  222.97   13.95
   9  -6  -2  197.06   16.29
  -9   6   1   48.92    6.36
   9  -6  -1   52.37    8.21
  -9   6   0  144.24   11.47
   9  -6   0  132.12   13.31
  -9   6  -1  186.76   13.13
   9  -6   1  148.42   14.06
  -9   6  -2   12.21    3.28
   9  -6   2   11.99    3.35
  -9   6  -3  247.83   15.33
   9  -6   3  214.20   15.99
  -9   6  -4   52.47    6.55
   9  -6   4   45.03    6.62
  -9   6  -5  104.24    9.05
  -9   6  -6   90.65    7.91
  -9   6  -7   20.52    3.30
   9  -6   7   20.67    3.30
  -9   6  -8  111.47    7.55
  -9   6  -9   12.06    2.07
   9  -5  -9    5.75    2.10
   9  -5  -8  226.51   14.55
   9  -5  -7  135.01   11.60
  -9   5   6   38.50    4.85
   9  -5  -6   32.02    5.83
  -9   5   5  195.64   12.80
   9  -5  -5  187.44   15.59
  -9   5   4    4.33    2.46
   9  -5  -4    7.05    3.30
  -9   5   3  199.04   13.96
   9  -5  -3  170.57   15.62
  -9   5   2  222.52   15.31
   9  -5  -2  197.03   17.08
  -9   5   1   99.24   10.14
   9  -5  -1   81.62   10.98
  -9   5   0  137.20   12.15
   9  -5   0  115.14   12.59
  -9   5  -1   14.10    4.33
   9  -5   1   11.81    4.26
  -9   5  -2  269.22   17.80
   9  -5   2  242.13   18.21
  -9   5  -3   69.70    8.55
   9  -5   3   86.39   10.00
  -9   5  -4  209.91   15.14
  -9   5  -5   54.87    7.15
  -9   5  -6    2.69    2.48
  -9   5  -7  180.51   12.33
  -9   5  -8   10.34    2.78
  -9   5  -9   38.14    4.58
  -9   5 -10   33.41    3.52
   9  -4 -10   67.10    6.10
   9  -4  -9   85.60    7.87
  -9   4   8  197.18   11.34
   9  -4  -8  190.54   13.78
  -9   4   7   61.46    6.56
   9  -4  -7   53.80    7.62
  -9   4   6  172.46   12.32
   9  -4  -6  161.04   14.07
  -9   4   5   17.38    4.00
   9  -4  -5   13.89    4.63
  -9   4   4  346.64   20.24
   9  -4  -4  318.10   21.81
  -9   4   3  230.34   16.25
   9  -4  -3  216.91   17.78
  -9   4   2   88.52    9.99
   9  -4  -2   78.59   10.36
  -9   4   1  436.73   24.18
   9  -4  -1  368.72   24.42
  -9   4   0    2.37    2.44
   9  -4   0    0.43    2.03
  -9   4  -1  426.17   24.56
   9  -4   1  430.03   25.70
  -9   4  -2   89.61   10.40
  -9   4  -3   33.77    6.43
  -9   4  -4  279.70   18.94
  -9   4  -5   17.00    4.45
  -9   4  -6  223.90   15.86
  -9   4  -7   14.11    4.17
  -9   4  -8   33.25    5.06
  -9   4  -9  137.14    9.99
  -9   4 -10    2.80    1.30
  -9   4 -11   48.36    4.28
  -9   3  10   66.44    5.01
   9  -3 -10   71.19    6.61
  -9   3   9  137.87    9.02
   9  -3  -9  140.07   10.84
  -9   3   8    5.50    2.34
   9  -3  -8    6.67    3.10
  -9   3   7  283.40   16.70
   9  -3  -7  283.41   18.77
  -9   3   6   36.73    5.69
   9  -3  -6   37.55    6.80
  -9   3   5  180.25   14.22
   9  -3  -5  177.49   15.53
  -9   3   4  166.48   14.07
   9  -3  -4  159.78   15.16
  -9   3   3    0.41    2.42
   9  -3  -3   -0.61    2.00
  -9   3   2  663.82   32.42
   9  -3  -2  637.24   33.68
  -9   3   1   13.98    5.02
   9  -3  -1    8.85    3.94
  -9   3   0  147.14   13.72
  -9   3  -1  112.23   12.02
  -9   3  -2  110.19   11.91
  -9   3  -3  278.32   19.61
  -9   3  -4   11.38    4.08
  -9   3  -5  190.62   15.48
  -9   3  -6  111.41   11.35
  -9   3  -7  182.56   11.66
  -9   3  -7  184.99   14.52
  -9   3  -8  150.90   12.21
  -9   3  -9    1.00    1.83
  -9   3 -10   90.45    7.77
  -9   3 -11   51.76    5.03
  -9   2  10  173.85    9.91
   9  -2 -10  194.23   11.82
  -9   2   9    0.56    1.12
   9  -2  -9    2.22    2.73
  -9   2   8  188.41   12.88
   9  -2  -8  186.78   14.03
  -9   2   7   36.25    5.90
   9  -2  -7   41.99    6.79
  -9   2   6   94.44   10.25
   9  -2  -6   96.85   10.89
  -9   2   5  185.39   15.06
   9  -2  -5  189.95   16.07
  -9   2   4   83.03   10.20
   9  -2  -4   85.28   10.64
  -9   2   3   36.85    6.69
   9  -2  -3   22.85    5.11
  -9   2   2   10.33    3.89
   9  -2  -2    6.69    2.89
  -9   2   1   59.67    8.67
  -9   2   0  126.02   12.85
  -9   2  -1   70.14    9.55
  -9   2  -2   26.12    5.93
  -9   2  -3   13.25    4.33
  -9   2  -4  480.85   27.39
  -9   2  -5   82.33   10.39
  -9   2  -6   21.59    5.01
  -9   2  -7  184.63   12.64
  -9   2  -7  190.41   15.08
  -9   2  -8   12.54    2.99
  -9   2  -8    7.14    3.17
  -9   2  -9  201.96   14.13
  -9   2 -10   26.03    4.41
  -9   2 -11   40.13    4.78
  -9   2 -12   55.85    4.76
  -9   1  11   84.30    5.71
   9  -1 -11   91.74    6.59
  -9   1  10    1.40    1.28
   9  -1 -10    6.45    2.42
  -9   1   9   56.86    6.40
   9  -1  -9   56.18    6.84
  -9   1   8  135.37   11.23
   9  -1  -8  153.42   12.52
  -9   1   7  153.28   12.80
   9  -1  -7  148.78   13.12
  -9   1   6   73.61    9.17
   9  -1  -6   82.87    9.65
  -9   1   5    0.55    2.42
   9  -1  -5    4.17    2.87
  -9   1   4  201.71   16.50
   9  -1  -4  209.55   16.74
  -9   1   3   72.61    9.63
  -9   1   2  239.52   18.20
  -9   1   1   80.31   10.30
  -9   1   0   86.97   10.57
   9  -1   0   70.89   22.50
  -9   1  -1  236.71   18.26
   9  -1   1  232.05   42.06
  -9   1  -2  122.83   12.91
  -9   1  -3   20.77    5.56
  -9   1  -4   86.47   10.79
  -9   1  -5   24.64    5.55
  -9   1  -6  417.40   24.75
  -9   1  -7    1.98    1.96
  -9   1  -7    1.06    2.47
  -9   1  -8  126.41   11.80
  -9   1  -8  122.86    9.97
  -9   1  -9  176.63   13.50
  -9   1  -9  180.17   11.44
  -9   1 -10   50.45    6.37
  -9   1 -11   66.67    6.46
  -9   1 -12   -0.49    0.75
  -9   0  11   36.33    3.78
  -9   0  10  206.13   11.83
   9   0 -10  205.81   12.20
   9   0  -9   16.93    3.70
   9   0  -8   31.91    5.67
   9   0  -7  166.38   13.80
   9   0  -6   62.53    8.36
   9   0  -5  213.66   16.45
  -9   0   4   56.23    8.70
  -9   0   3   46.05    7.79
  -9   0   2  815.35   38.35
   9   0  -1   33.32   21.16
  -9   0   1   19.03    5.26
   9   0   0  503.33   62.20
  -9   0   0  444.77   26.32
   9   0   1  131.76   30.19
  -9   0  -1  149.64   14.27
   9   0   2   36.96   15.93
  -9   0  -2   20.71    5.65
   9   0   3  247.27   41.21
  -9   0  -3  292.34   20.38
  -9   0  -4   52.15    7.93
  -9   0  -5  179.91   15.53
  -9   0  -6   -1.54    2.74
  -9   0  -7  221.92   15.29
  -9   0  -7  234.60   17.24
  -9   0  -8  203.53   15.42
  -9   0  -8  229.16   14.77
  -9   0  -9    6.41    2.50
  -9   0  -9    4.98    2.77
  -9   0  -9    4.89    2.42
  -9   0 -10  111.50    9.73
  -9   0 -10  109.21    8.24
  -9   0 -10  108.74    9.00
  -9   0 -11    2.41    1.78
  -9   0 -11    1.98    1.53
  -9   0 -12  104.65    7.22
  -9  -1  11   70.14    5.32
   9   1 -10   43.06    5.00
  -9  -1  10   41.38    4.18
   9   1  -9    7.03    3.07
  -9  -1   9    3.06    1.48
   9   1  -8  382.20   20.26
  -9  -1   8  339.71   17.28
   9   1  -7    0.11    2.38
  -9  -1   7   -2.70    1.89
   9   1  -6   21.67    4.74
  -9  -1   6   21.79    4.35
  -9  -1   5  186.32   13.20
  -9  -1   4  289.68   17.26
  -9  -1   3  526.63   29.12
  -9  -1   2    2.62    2.61
   9   1  -1  187.88   39.44
  -9  -1   1  217.99   17.38
   9   1   0  182.75   37.17
  -9  -1   0  227.91   17.64
   9   1   1  276.78   43.52
  -9  -1  -1  352.71   22.52
   9   1   2  356.07   49.94
  -9  -1  -2  390.93   23.95
   9   1   3  -26.28   21.48
  -9  -1  -3    2.10    2.32
   9   1   4  278.08   44.40
  -9  -1  -4  376.78   23.18
  -9  -1  -5   31.82    6.27
  -9  -1  -6  337.33   21.52
  -9  -1  -7  102.08   10.07
  -9  -1  -7  115.17   11.48
  -9  -1  -8   15.83    3.94
  -9  -1  -8   15.85    4.35
  -9  -1  -8   16.72    3.70
  -9  -1  -9  306.30   18.29
  -9  -1  -9  315.77   17.48
  -9  -1  -9  292.76   17.29
  -9  -1 -10    6.32    2.70
  -9  -1 -10    4.98    2.23
  -9  -1 -10   -1.82    2.13
  -9  -1 -11  170.10   10.96
  -9  -1 -11  176.89   11.35
  -9  -1 -12   98.61    6.95
  -9  -1 -12  108.53    7.76
  -9  -2  11  182.95    9.22
   9   2 -10    6.49    1.88
  -9  -2  10    5.28    1.48
   9   2  -9  147.43   10.28
  -9  -2   9  123.51    8.77
   9   2  -8   59.67    6.85
  -9  -2   8   51.51    5.93
  -9  -2   7   77.67    8.01
  -9  -2   6  233.65   15.25
  -9  -2   5   92.13    9.27
  -9  -2   4  283.27   17.61
  -9  -2   3  154.01   12.64
  -9  -2   2  444.42   26.09
  -9  -2   2  451.84   23.32
  -9  -2   1  124.72   12.70
  -9  -2   1  133.91   11.51
  -9  -2   0   48.56    7.90
  -9  -2   0   45.85    6.44
  -9  -2  -1  414.06   24.54
  -9  -2  -2    8.58    3.58
  -9  -2  -3  494.16   27.18
  -9  -2  -4  343.82   21.74
  -9  -2  -5   78.98    9.63
  -9  -2  -6  421.02   23.17
  -9  -2  -6  372.12   22.59
  -9  -2  -7   14.12    3.94
  -9  -2  -7    5.62    2.01
  -9  -2  -8  310.70   19.37
  -9  -2  -8  416.62   21.50
  -9  -2  -9   45.63    6.32
  -9  -2  -9   62.47    7.37
  -9  -2  -9   69.11    7.82
  -9  -2 -10   74.14    7.47
  -9  -2 -10   98.27    8.64
  -9  -2 -10   92.15    8.83
  -9  -2 -11  199.62   11.61
  -9  -2 -11  174.72   11.88
  -9  -2 -12   32.38    4.31
   9   2  13   51.66    4.93
  -9  -3  10  178.51    9.45
  -9  -3   9   81.93    6.92
  -9  -3   8  166.39   11.34
  -9  -3   7  102.87    9.31
  -9  -3   6    1.82    2.02
  -9  -3   5  144.45   12.15
  -9  -3   4   94.14    9.71
  -9  -3   3  388.73   21.81
  -9  -3   2  209.99   16.68
  -9  -3   2  220.88   15.65
  -9  -3   1   27.83    5.50
  -9  -3   1   22.91    4.90
  -9  -3   0  765.37   35.38
  -9  -3   0  712.37   32.29
  -9  -3  -1    3.10    3.14
  -9  -3  -1    6.43    2.59
  -9  -3  -2  259.04   18.67
  -9  -3  -2  332.79   19.19
  -9  -3  -3  202.94   16.13
  -9  -3  -3  268.36   16.96
  -9  -3  -4   88.02   10.04
  -9  -3  -4  123.74   10.91
  -9  -3  -5  328.04   20.45
  -9  -3  -5  292.87   19.54
  -9  -3  -5  352.82   19.80
  -9  -3  -5  362.92   20.54
  -9  -3  -6   10.92    4.08
  -9  -3  -6    2.46    1.43
  -9  -3  -6   11.04    3.53
  -9  -3  -6   11.10    3.86
  -9  -3  -7  272.79   17.47
  -9  -3  -7  264.35   17.79
  -9  -3  -8  103.89   10.40
  -9  -3  -9  157.57   12.24
  -9  -3 -10  162.95   11.72
  -9  -3 -10  158.18   12.13
  -9  -3 -11   20.47    3.66
  -9  -3 -11   15.36    3.56
  -9  -3 -12  105.99    7.31
  -9  -3 -12  100.00    7.86
  -9  -3 -13   11.78    2.35
  -9  -4  10   46.79    4.38
  -9  -4  10   46.68    4.19
  -9  -4   9   90.64    7.13
  -9  -4   8  155.30   10.77
  -9  -4   7   -1.30    1.77
  -9  -4   6  235.85   15.47
  -9  -4   5   72.60    8.59
  -9  -4   4  179.67   13.98
  -9  -4   3  150.51   12.78
  -9  -4   2   19.68    4.98
  -9  -4   2   16.56    4.04
  -9  -4   1  265.11   18.91
  -9  -4   1  353.79   20.40
  -9  -4   0   59.35    8.31
  -9  -4   0   79.83    9.18
  -9  -4  -1  147.81   13.35
  -9  -4  -1  194.66   14.53
  -9  -4  -2  213.25   16.18
  -9  -4  -2  275.89   17.49
  -9  -4  -3  166.54   13.79
  -9  -4  -3  151.84   12.76
  -9  -4  -4  451.30   24.94
  -9  -4  -4  428.96   23.60
  -9  -4  -4  470.12   24.35
  -9  -4  -5   19.59    5.09
  -9  -4  -5   12.31    3.36
  -9  -4  -5   13.39    3.99
  -9  -4  -6  243.19   17.02
  -9  -4  -6  224.89   16.36
  -9  -4  -6  243.29   16.27
  -9  -4  -7   21.87    4.92
  -9  -4  -7   21.96    5.09
  -9  -4  -8   94.29    9.77
  -9  -4  -9  211.79   14.65
  -9  -4 -10    8.29    2.59
  -9  -4 -11  198.05   12.25
  -9  -4 -11  205.26   13.06
  -9  -4 -12    8.87    2.09
  -9  -4 -12    2.71    1.35
  -9  -4 -13   65.02    5.37
  -9  -5  10   16.41    2.24
  -9  -5   9   97.11    7.00
  -9  -5   8    7.14    2.04
  -9  -5   7  275.54   15.77
  -9  -5   6   46.58    6.47
  -9  -5   5   31.57    5.54
  -9  -5   4  212.75   15.38
  -9  -5   3   26.23    5.12
  -9  -5   3   36.17    5.98
  -9  -5   2  153.23   13.11
  -9  -5   2  187.87   14.47
  -9  -5   1   90.53    9.88
  -9  -5   1   80.68    9.30
  -9  -5   0  173.62   14.09
  -9  -5  -1  181.43   13.90
  -9  -5  -1  231.56   16.18
  -9  -5  -2   39.80    6.06
  -9  -5  -2   45.25    6.53
  -9  -5  -2   32.43    5.74
  -9  -5  -3  381.59   21.83
  -9  -5  -3  400.82   21.91
  -9  -5  -4   52.89    7.70
  -9  -5  -4   45.43    7.01
  -9  -5  -4   47.79    7.20
  -9  -5  -5  107.52   10.92
  -9  -5  -5   98.68   10.34
  -9  -5  -5   87.59    9.71
  -9  -5  -6  269.67   17.98
  -9  -5  -6  276.02   18.23
  -9  -5  -6  273.38   17.62
  -9  -5  -7   21.36    4.46
  -9  -5  -7   21.14    5.16
  -9  -5  -8  199.26   14.69
  -9  -5  -8  184.21   14.24
  -9  -5  -9   -0.63    2.24
  -9  -5 -10  108.87    9.58
  -9  -5 -11   38.84    5.05
  -9  -5 -12   35.43    4.17
  -9  -5 -12   38.42    4.63
  -9  -5 -13  120.71    7.41
  -9  -6   9    4.46    1.30
  -9  -6   8  132.71    8.43
  -9  -6   8  167.99    9.92
  -9  -6   7   39.81    5.06
  -9  -6   6   14.71    3.52
  -9  -6   5  195.03   13.18
  -9  -6   5  192.21   13.85
  -9  -6   4   22.18    4.56
  -9  -6   3  297.16   17.51
  -9  -6   3  267.57   17.80
  -9  -6   2   93.53    9.68
  -9  -6   2   79.54    9.23
  -9  -6   1  130.07   11.89
  -9  -6   1  163.61   13.59
  -9  -6   0  184.27   14.73
  -9  -6   0  202.77   14.29
  -9  -6  -1    1.10    1.56
  -9  -6  -1    2.92    2.74
  -9  -6  -2  290.21   18.57
  -9  -6  -2  293.32   18.04
  -9  -6  -3    2.27    2.05
  -9  -6  -3    5.34    3.08
  -9  -6  -3    7.51    3.44
  -9  -6  -4   95.08   10.13
  -9  -6  -4  121.62   11.64
  -9  -6  -4  123.55   11.41
  -9  -6  -5  185.43   14.35
  -9  -6  -5  176.75   14.17
  -9  -6  -5  172.95   14.14
  -9  -6  -6   42.42    6.55
  -9  -6  -6   46.43    7.00
  -9  -6  -6   48.94    7.17
  -9  -6  -7  149.61   12.57
  -9  -6  -7  143.14   12.54
  -9  -6  -8   37.99    6.33
  -9  -6  -8   35.70    6.25
  -9  -6  -9  163.95   12.50
  -9  -6 -10   41.72    5.76
  -9  -6 -11   31.60    4.43
  -9  -6 -12  177.40    9.92
  -9  -6 -12  167.16   10.11
  -9  -6 -13    3.57    1.24
  -9  -7   8  116.33    7.70
  -9  -7   7    2.52    1.58
  -9  -7   6  282.17   15.44
  -9  -7   5   38.82    5.02
  -9  -7   5   35.37    5.29
  -9  -7   4  140.85   10.85
  -9  -7   4  135.66   11.41
  -9  -7   3  142.48   11.37
  -9  -7   3  129.79   11.29
  -9  -7   2   88.38    9.29
  -9  -7   2   90.61    9.60
  -9  -7   1   57.67    7.91
  -9  -7   1   57.57    7.81
  -9  -7   1   62.88    7.65
  -9  -7   0    0.57    2.10
  -9  -7   0    0.04    1.71
  -9  -7  -1  157.69   13.18
  -9  -7  -1  142.75   12.26
  -9  -7  -2   98.54   10.34
  -9  -7  -2   91.19    9.84
  -9  -7  -3  409.26   22.58
  -9  -7  -3  402.67   22.15
  -9  -7  -4  154.35   12.64
  -9  -7  -4  176.87   14.13
  -9  -7  -4  200.58   14.81
  -9  -7  -5   74.73    8.64
  -9  -7  -5   87.58    9.58
  -9  -7  -5   82.43    9.41
  -9  -7  -6  201.33   14.52
  -9  -7  -6  190.36   14.39
  -9  -7  -6  194.75   14.89
  -9  -7  -7   46.83    6.84
  -9  -7  -7   52.42    7.46
  -9  -7  -8  110.94   10.20
  -9  -7  -8  120.71   10.78
  -9  -7  -9   72.94    7.93
  -9  -7 -10    4.30    2.25
  -9  -7 -11  252.26   13.43
  -9  -7 -12    0.83    0.96
  -9  -7 -12    1.19    1.43
  -9  -8   7  141.15    8.34
  -9  -8   6   33.90    3.91
  -9  -8   6   27.88    3.93
  -9  -8   5  144.55    9.62
  -9  -8   5  142.37   10.20
  -9  -8   4  261.76   14.95
  -9  -8   4  250.88   15.15
  -9  -8   3   18.28    3.97
  -9  -8   3   21.94    4.43
  -9  -8   2  178.37   13.20
  -9  -8   2  173.01   13.15
  -9  -8   2  173.91   11.96
  -9  -8   1    0.41    2.06
  -9  -8   1    2.02    1.93
  -9  -8   1    4.38    2.49
  -9  -8   0  258.72   17.04
  -9  -8   0  260.35   16.44
  -9  -8  -1  103.37   10.31
  -9  -8  -1   99.52    9.74
  -9  -8  -2  111.58   10.82
  -9  -8  -2  101.83   10.22
  -9  -8  -3  369.73   21.32
  -9  -8  -3  359.74   20.79
  -9  -8  -4    2.98    1.89
  -9  -8  -4    3.79    3.59
  -9  -8  -4    3.93    3.05
  -9  -8  -5  227.21   15.08
  -9  -8  -5  261.42   16.99
  -9  -8  -5  244.69   16.37
  -9  -8  -6   83.44    8.73
  -9  -8  -6   83.06    9.01
  -9  -8  -6   87.63    9.20
  -9  -8  -7  110.54    9.89
  -9  -8  -7  108.31   10.24
  -9  -8  -8  189.94   13.11
  -9  -8  -8  206.06   13.84
  -9  -8  -9   15.12    3.40
  -9  -8  -9   12.82    3.36
  -9  -8 -10  154.53   10.23
  -9  -8 -11    1.13    0.92
  -9  -8 -12   60.13    4.65
  -9  -8 -12   54.38    4.54
  -9  -9   6  266.84   12.18
  -9  -9   5   43.74    4.60
  -9  -9   5   44.42    4.80
  -9  -9   4   11.60    2.94
  -9  -9   4   12.39    2.89
  -9  -9   3  432.21   20.38
  -9  -9   3  427.48   20.25
  -9  -9   3  419.38   18.83
  -9  -9   2   12.99    3.44
  -9  -9   2   15.61    3.33
  -9  -9   2   11.90    3.12
  -9  -9   1  186.13   13.34
  -9  -9   1  177.34   12.87
  -9  -9   1  183.10   12.56
  -9  -9   0   60.92    7.23
  -9  -9   0   57.16    6.85
  -9  -9  -1   19.40    4.04
  -9  -9  -1   20.34    4.33
  -9  -9  -2  172.08   13.02
  -9  -9  -2  155.05   12.18
  -9  -9  -3    0.07    1.86
  -9  -9  -3    0.21    2.11
  -9  -9  -4  197.23   14.08
  -9  -9  -4  208.78   14.53
  -9  -9  -5  103.51    9.01
  -9  -9  -5  128.62   10.94
  -9  -9  -5  138.47   11.38
  -9  -9  -6   41.64    6.07
  -9  -9  -6   33.79    5.65
  -9  -9  -7  299.32   16.24
  -9  -9  -7  301.64   17.16
  -9  -9  -8   20.78    3.78
  -9  -9  -8   18.47    3.60
  -9  -9  -9  135.95    9.50
  -9  -9  -9  147.42   10.03
  -9  -9 -10   36.20    4.18
  -9  -9 -10   30.09    3.78
  -9  -9 -11   86.19    6.03
  -9 -10   5   35.57    3.46
  -9 -10   4  170.64    9.53
  -9 -10   3    2.17    1.12
  -9 -10   3    4.52    1.72
  -9 -10   3    3.28    1.45
  -9 -10   2   47.49    5.50
  -9 -10   2   51.64    5.42
  -9 -10   1  128.63    9.65
  -9 -10   1  132.77    9.56
  -9 -10   0   14.21    3.24
  -9 -10   0   15.50    3.36
  -9 -10  -1   81.23    7.95
  -9 -10  -1   82.13    8.05
  -9 -10  -2   48.49    6.14
  -9 -10  -2   35.34    5.21
  -9 -10  -3  246.69   14.99
  -9 -10  -3  251.33   15.10
  -9 -10  -4   92.38    8.66
  -9 -10  -4  105.18    9.17
  -9 -10  -5   14.53    3.10
  -9 -10  -5   14.32    3.46
  -9 -10  -6  143.86    9.50
  -9 -10  -6  164.54   11.38
  -9 -10  -7   -1.19    0.94
  -9 -10  -7    0.54    1.57
  -9 -10  -8   78.68    6.42
  -9 -10  -8   88.68    7.34
  -9 -10  -9   58.40    5.17
  -9 -10 -10   79.28    5.54
  -9 -11   3   44.13    3.88
  -9 -11   2  107.27    7.07
  -9 -11   2  108.82    7.12
  -9 -11   1   -0.75    0.90
  -9 -11   1    1.44    1.03
  -9 -11   0  135.85    9.07
  -9 -11   0  153.95    9.76
  -9 -11  -1   47.21    5.16
  -9 -11  -1   52.00    5.62
  -9 -11  -2  190.08   11.41
  -9 -11  -2  188.88   11.67
  -9 -11  -3   70.28    6.60
  -9 -11  -3   73.21    6.94
  -9 -11  -4    0.74    1.86
  -9 -11  -4    0.82    1.20
  -9 -11  -5  127.09    9.18
  -9 -11  -6    2.70    1.16
  -9 -11  -7   70.66    6.15
  -9 -11  -8   99.00    6.92
  -9 -12   0    2.58    1.06
  -9 -12  -1   31.39    3.67
  -9 -12  -1   30.69    3.41
  -9 -12  -2   61.96    5.42
  -9 -12  -2   58.42    4.85
  -9 -12  -3    4.97    1.71
  -9 -12  -4   92.56    6.91
  -9 -12  -5   14.41    2.58
  -9 -12  -6   39.66    4.03
  -9 -12  -7  109.98    6.59
  10  -8  -2    2.36    1.40
  10  -8  -1   73.28    6.13
  10  -8   0   23.17    2.85
  10  -8   1   27.59    3.21
  10  -8   2   97.04    6.20
  10  -8   3   -0.43    0.72
  10  -7  -5    8.30    2.10
  10  -7  -4   40.47    4.95
  10  -7  -3   14.30    2.98
  10  -7  -2   71.22    7.17
  10  -7  -2   65.19    5.17
  10  -7  -1  101.28    8.60
  10  -7  -1   98.22    7.07
  10  -7   0   15.80    3.20
  10  -7   0   19.75    3.14
  10  -7   1  146.66   10.18
  10  -7   1  158.70    9.74
  10  -7   2    2.50    1.07
  10  -7   3   29.47    3.85
  10  -7   4   37.72    4.06
  10  -7   5   23.77    2.89
  10  -6  -6    5.78    2.15
  10  -6  -5   75.56    7.30
  10  -6  -4   35.27    5.40
  10  -6  -3   55.80    7.05
 -10   6   2  122.93    8.35
  10  -6  -2  107.57    9.74
  10  -6  -2   91.34    7.21
 -10   6   1    4.79    1.89
  10  -6  -1    2.65    1.89
 -10   6   0  243.31   13.16
  10  -6   0  195.66   13.80
 -10   6  -1   12.16    2.67
  10  -6   1   16.52    3.73
 -10   6  -2   89.91    7.61
 -10   6  -3  123.15    8.98
 -10   6  -4    8.26    2.45
 -10   6  -5  116.01    7.95
 -10   6  -6   11.53    2.10
  10  -6   6   12.94    2.27
  10  -5  -7    3.88    1.86
  10  -5  -6  153.56   10.87
 -10   5   5   44.43    4.81
  10  -5  -5   44.77    5.96
 -10   5   4   15.14    3.07
  10  -5  -4   13.38    3.78
 -10   5   3  191.53   12.03
  10  -5  -3  179.98   13.62
 -10   5   2   -1.51    1.68
  10  -5  -2    3.69    2.93
 -10   5   1  182.78   12.42
  10  -5  -1  164.22   13.27
 -10   5   0   55.98    6.90
  10  -5   0   61.27    7.58
 -10   5  -1  133.29   10.79
 -10   5  -2  175.60   12.53
 -10   5  -3    3.63    2.59
 -10   5  -4  104.28    9.04
 -10   5  -5   42.02    5.41
 -10   5  -6   52.26    5.66
 -10   5  -7   46.99    4.88
 -10   5  -8   10.15    2.11
  10  -4  -8    6.00    2.21
 -10   4   7  100.78    6.92
  10  -4  -7  101.79    8.51
 -10   4   6  111.01    8.06
  10  -4  -6   95.49    8.87
 -10   4   5   45.43    5.51
  10  -4  -5   44.16    6.23
 -10   4   4  233.98   14.14
  10  -4  -4  198.10   14.77
 -10   4   3    3.50    2.19
  10  -4  -3   -4.08    2.47
 -10   4   2   46.77    6.61
  10  -4  -2   57.43    7.73
 -10   4   1  276.65   17.18
  10  -4  -1  260.41   17.53
 -10   4   0  118.68   10.90
 -10   4  -1  200.59   14.75
 -10   4  -2    2.35    1.74
 -10   4  -3  280.10   17.55
 -10   4  -4   49.51    7.09
 -10   4  -5   94.37    9.06
 -10   4  -6   71.84    7.57
 -10   4  -7    4.10    1.98
 -10   4  -8  166.38   10.20
 -10   4  -9    2.56    0.97
 -10   3   8   93.00    6.58
  10  -3  -8  101.17    7.80
 -10   3   7  156.05    9.91
  10  -3  -7  135.91   10.38
 -10   3   6   38.08    5.15
  10  -3  -6   30.53    5.07
 -10   3   5   97.32    8.84
  10  -3  -5  103.05   10.01
 -10   3   4   33.98    5.43
  10  -3  -4   39.26    6.53
 -10   3   3  162.78   13.13
  10  -3  -3  172.70   13.95
 -10   3   2   53.49    7.51
 -10   3   1   33.31    5.86
 -10   3   0   96.10   10.31
 -10   3  -1   51.54    7.47
 -10   3  -2  434.60   24.21
 -10   3  -3   74.36    9.07
 -10   3  -4    4.46    2.70
 -10   3  -5  314.04   18.98
 -10   3  -6   22.93    3.76
 -10   3  -6   26.16    5.15
 -10   3  -7  189.76   12.96
 -10   3  -7  187.36   10.53
 -10   3  -8   24.07    4.07
 -10   3  -9   42.67    4.81
 -10   3 -10   81.36    5.87
 -10   2   9   84.70    5.79
 -10   2   8   78.19    6.52
  10  -2  -8   73.64    6.82
 -10   2   7    2.38    1.65
  10  -2  -7    2.83    1.47
 -10   2   6  106.44    9.51
  10  -2  -6   90.94    9.08
 -10   2   5   66.51    7.90
  10  -2  -5   57.12    7.26
 -10   2   4   65.05    8.19
  10  -2  -4   61.64    7.95
 -10   2   3   51.17   11.73
 -10   2   2    1.10    2.59
 -10   2   1  164.59   14.28
 -10   2   0   40.10    6.91
 -10   2  -1   60.04    8.56
 -10   2  -2  161.75   14.22
 -10   2  -3    5.81    3.19
 -10   2  -4  361.66   21.88
 -10   2  -5   28.47    5.85
 -10   2  -6   47.12    5.75
 -10   2  -6   45.87    6.92
 -10   2  -7  126.34    9.26
 -10   2  -7  125.95   10.82
 -10   2  -8  136.94   10.67
 -10   2  -8  146.98    9.02
 -10   2  -9   65.83    6.43
 -10   2 -10    4.94    1.46
 -10   1   9  148.21    8.59
  10  -1  -9  127.31    8.20
 -10   1   8   17.69    3.43
  10  -1  -8   14.12    3.07
 -10   1   7  182.70   12.32
  10  -1  -7  178.89   12.18
 -10   1   6   73.84    8.24
  10  -1  -6   82.35    8.38
 -10   1   5    5.34    2.81
 -10   1   4  319.13   19.69
 -10   1   3   29.96    5.68
 -10   1   2  327.83   20.94
 -10   1   1   82.12    9.95
 -10   1   0   60.22    8.33
 -10   1  -1  119.41   12.17
 -10   1  -2  109.58   11.79
 -10   1  -3  183.12   15.21
 -10   1  -4   62.44    8.91
 -10   1  -5  257.41   17.90
 -10   1  -6   71.63    7.88
 -10   1  -6   59.23    8.01
 -10   1  -7   53.74    6.27
 -10   1  -7   51.84    6.96
 -10   1  -8   80.77    8.40
 -10   1  -8   85.47    7.27
 -10   1  -9   23.79    3.43
 -10   1  -9   28.49    4.57
 -10   1 -10  109.56    7.97
 -10   1 -11    6.70    1.78
 -10   0   9   12.56    2.42
 -10   0   8  113.97    8.77
  10   0  -8  104.03    8.11
 -10   0   7  162.52   11.69
 -10   0   6  114.53   10.54
 -10   0   5  270.34   17.74
 -10   0   4    1.00    2.51
 -10   0   3  474.90   26.17
 -10   0   2  359.63   22.39
 -10   0   1  325.12   21.23
 -10   0   0  199.86   16.16
 -10   0  -1    0.01    2.44
 -10   0  -2  123.95   12.49
 -10   0  -3   21.92    5.20
 -10   0  -4  210.46   16.28
 -10   0  -5  134.51   12.50
 -10   0  -6   20.47    4.12
 -10   0  -6   17.68    4.49
 -10   0  -7  292.43   16.68
 -10   0  -7  279.13   17.60
 -10   0  -8    1.47    1.32
 -10   0  -8    1.04    1.43
 -10   0  -9  135.05   10.22
 -10   0  -9  141.13    9.35
 -10   0 -10   39.19    4.77
 -10   0 -11   18.84    2.77
 -10  -1   9  163.50    9.60
 -10  -1   8   55.16    6.07
 -10  -1   7   51.42    6.62
 -10  -1   6  216.38   14.80
 -10  -1   5   14.52    3.50
 -10  -1   4  249.85   17.42
 -10  -1   3   37.27    6.82
 -10  -1   2  148.09   13.61
 -10  -1   1  416.90   24.61
 -10  -1   0    7.41    3.58
 -10  -1  -1  209.62   16.64
 -10  -1  -2   41.35    7.28
 -10  -1  -3   84.70   10.01
 -10  -1  -4  200.97   15.74
 -10  -1  -5   21.86    5.44
 -10  -1  -6  347.83   19.76
 -10  -1  -6  335.28   20.28
 -10  -1  -7   18.69    4.14
 -10  -1  -7   13.08    3.77
 -10  -1  -8  178.30   12.76
 -10  -1  -8  173.29   12.00
 -10  -1  -9  194.28   12.60
 -10  -1  -9  203.78   12.24
 -10  -1 -10   51.41    5.36
 -10  -1 -10   44.32    4.73
 -10  -1 -11   76.88    5.69
 -10  -2   9   64.51    5.53
 -10  -2   8    6.93    2.27
 -10  -2   8    6.28    2.10
 -10  -2   7  196.42   12.97
 -10  -2   7  197.50   11.17
 -10  -2   6   -0.01    1.93
 -10  -2   6    0.05    1.04
 -10  -2   5  115.92   11.12
 -10  -2   5  111.72    9.10
 -10  -2   4  146.26   12.91
 -10  -2   4  162.05   11.41
 -10  -2   3  109.65   11.23
 -10  -2   3  111.47    9.50
 -10  -2   2  359.85   22.15
 -10  -2   1   -1.01    2.48
 -10  -2   0  380.04   23.02
 -10  -2  -1  261.42   18.31
 -10  -2  -2  122.03   12.05
 -10  -2  -3  168.85   14.25
 -10  -2  -4    9.53    3.16
 -10  -2  -5  488.87   25.33
 -10  -2  -5  500.80   25.93
 -10  -2  -6   47.06    6.84
 -10  -2  -6   31.16    5.79
 -10  -2  -7   53.73    7.09
 -10  -2  -7   61.39    7.49
 -10  -2  -8  182.96   12.69
 -10  -2  -8  189.96   11.93
 -10  -2  -9    6.98    2.50
 -10  -2  -9    6.70    2.34
 -10  -2  -9    9.71    2.45
 -10  -2 -10  200.88   11.40
 -10  -2 -10  184.95   10.87
 -10  -2 -11    5.04    1.65
 -10  -2 -11    6.94    1.74
 -10  -3   9    8.54    1.88
 -10  -3   8  111.50    8.12
 -10  -3   8  104.51    7.06
 -10  -3   7   14.37    3.30
 -10  -3   7   14.48    2.71
 -10  -3   6  133.15   10.94
 -10  -3   6  136.24    9.86
 -10  -3   5   94.12    9.53
 -10  -3   5   88.22    8.18
 -10  -3   4   19.42    4.68
 -10  -3   4   15.41    3.58
 -10  -3   3  306.41   19.38
 -10  -3   3  291.49   17.03
 -10  -3   2   65.37    8.60
 -10  -3   2   68.93    7.82
 -10  -3   1  242.97   17.40
 -10  -3   1  233.86   15.31
 -10  -3   0  137.08   12.79
 -10  -3   0  168.72   12.48
 -10  -3  -1   64.37    8.52
 -10  -3  -1   85.98    8.42
 -10  -3  -2  168.90   14.21
 -10  -3  -2  219.86   14.48
 -10  -3  -3   12.01    3.78
 -10  -3  -4  261.30   16.95
 -10  -3  -4  181.46   14.54
 -10  -3  -5   42.91    6.79
 -10  -3  -5   48.50    6.99
 -10  -3  -6   79.62    8.71
 -10  -3  -6   82.00    9.14
 -10  -3  -7  195.55   13.46
 -10  -3  -7  227.50   15.11
 -10  -3  -8    6.01    2.52
 -10  -3  -9  122.32    9.72
 -10  -3  -9  113.59    9.02
 -10  -3 -10   59.77    6.01
 -10  -3 -10   47.67    5.32
 -10  -3 -11   84.17    6.40
 -10  -3 -11   68.34    5.86
 -10  -4   8   35.80    4.09
 -10  -4   8   37.28    3.97
 -10  -4   7   92.42    7.77
 -10  -4   7  110.42    8.27
 -10  -4   6   53.49    6.29
 -10  -4   6   55.39    6.10
 -10  -4   5    3.54    1.86
 -10  -4   5    3.63    1.73
 -10  -4   4  151.87   12.17
 -10  -4   4  135.67   10.92
 -10  -4   3    2.27    2.68
 -10  -4   3    1.20    1.51
 -10  -4   2  142.36   12.29
 -10  -4   2  125.87   10.99
 -10  -4   1   66.19    8.24
 -10  -4   1   80.90    8.68
 -10  -4   0   29.52    5.38
 -10  -4   0   31.12    5.75
 -10  -4   0   30.25    5.26
 -10  -4  -1  203.57   14.47
 -10  -4  -1  190.53   14.72
 -10  -4  -1  234.46   15.32
 -10  -4  -2    7.84    3.27
 -10  -4  -2    4.26    2.07
 -10  -4  -2    8.15    3.24
 -10  -4  -3  152.60   12.67
 -10  -4  -3  152.56   12.34
 -10  -4  -3  144.06   11.87
 -10  -4  -4  117.08   11.06
 -10  -4  -4  114.68   10.25
 -10  -4  -5   48.06    7.14
 -10  -4  -5   46.14    6.28
 -10  -4  -6  147.56   12.40
 -10  -4  -7    3.87    2.88
 -10  -4  -8   75.15    8.13
 -10  -4  -9  145.47   10.74
 -10  -4 -10   85.74    7.40
 -10  -4 -10   72.29    6.72
 -10  -4 -11   64.82    5.52
 -10  -4 -11   60.06    5.49
 -10  -4 -12    0.13    1.23
 -10  -5   8   43.90    4.05
 -10  -5   7   70.99    6.03
 -10  -5   7   77.46    6.29
 -10  -5   6    0.49    1.09
 -10  -5   6    0.26    1.10
 -10  -5   5  174.44   11.91
 -10  -5   5  198.93   12.56
 -10  -5   4   14.41    3.21
 -10  -5   4   23.39    4.20
 -10  -5   3  166.02   12.61
 -10  -5   3  205.34   13.74
 -10  -5   2  128.14   10.99
 -10  -5   2  129.63   11.01
 -10  -5   1    7.58    2.59
 -10  -5   1    1.77    1.76
 -10  -5   0  178.18   13.56
 -10  -5  -1   78.79    8.35
 -10  -5  -1   62.69    8.00
 -10  -5  -2  109.13   10.17
 -10  -5  -2  143.57   11.85
 -10  -5  -3  296.44   18.04
 -10  -5  -3  281.41   17.55
 -10  -5  -4   12.40    3.84
 -10  -5  -4   14.79    4.07
 -10  -5  -4   13.38    3.47
 -10  -5  -5   86.11    9.14
 -10  -5  -5   76.43    8.23
 -10  -5  -5   90.36    9.06
 -10  -5  -6    4.41    1.99
 -10  -5  -6    2.17    2.09
 -10  -5  -6    3.63    1.59
 -10  -5  -7  120.76   10.63
 -10  -5  -8   93.89    8.84
 -10  -5  -9    9.58    3.07
 -10  -5 -10  163.04   10.56
 -10  -5 -11    0.16    1.07
 -10  -5 -11   -0.83    0.98
 -10  -5 -12  158.23    8.10
 -10  -6   7   -0.16    0.95
 -10  -6   6   85.11    7.01
 -10  -6   5   29.20    4.36
 -10  -6   4   33.21    5.01
 -10  -6   3  183.82   12.84
 -10  -6   2    4.58    2.00
 -10  -6   1  137.65   11.52
 -10  -6   0   55.63    7.24
 -10  -6  -1  126.15   11.13
 -10  -6  -2  167.66   12.28
 -10  -6  -2  170.96   13.16
 -10  -6  -3   41.72    5.99
 -10  -6  -3   48.24    6.89
 -10  -6  -3   51.19    6.40
 -10  -6  -4  201.90   14.21
 -10  -6  -4  193.12   14.02
 -10  -6  -4  220.23   14.38
 -10  -6  -5   25.60    4.90
 -10  -6  -5   29.22    5.40
 -10  -6  -5   25.87    4.72
 -10  -6  -6  208.74   14.15
 -10  -6  -6  204.65   13.88
 -10  -6  -6  206.00   13.82
 -10  -6  -7   17.88    4.19
 -10  -6  -7   14.06    3.48
 -10  -6  -8   12.00    3.53
 -10  -6  -9  205.70   12.67
 -10  -6 -10    1.41    1.11
 -10  -6 -11   70.91    5.67
 -10  -6 -11   68.87    5.66
 -10  -7   7   56.53    4.44
 -10  -7   6   54.00    5.03
 -10  -7   5   11.88    2.71
 -10  -7   4  102.24    8.48
 -10  -7   3    1.37    1.36
 -10  -7   2  238.20   14.94
 -10  -7   1   34.32    5.48
 -10  -7   0   31.62    5.56
 -10  -7  -1  154.33   12.22
 -10  -7  -1  158.13   11.32
 -10  -7  -2    2.80    1.82
 -10  -7  -2   -0.12    1.93
 -10  -7  -3  231.16   14.28
 -10  -7  -3  233.02   15.49
 -10  -7  -3  238.93   14.96
 -10  -7  -4   67.82    7.43
 -10  -7  -4   55.32    7.04
 -10  -7  -5  289.67   16.70
 -10  -7  -5  306.60   17.52
 -10  -7  -5  281.41   16.73
 -10  -7  -6  239.48   14.65
 -10  -7  -6  222.96   14.27
 -10  -7  -6  212.62   14.04
 -10  -7  -7   56.96    6.62
 -10  -7  -7   41.60    5.53
 -10  -7  -8  198.47   12.54
 -10  -7  -9   -0.15    1.21
 -10  -7 -10   28.77    3.88
 -10  -7 -11   70.20    5.33
 -10  -7 -11   79.29    5.62
 -10  -8   6   -0.16    0.97
 -10  -8   5  196.97   10.46
 -10  -8   4    4.70    1.60
 -10  -8   3  125.42    9.34
 -10  -8   2   79.45    7.66
 -10  -8   1   25.25    4.66
 -10  -8   0  198.84   13.44
 -10  -8   0  200.89   12.11
 -10  -8  -1    3.65    1.54
 -10  -8  -1    0.84    2.09
 -10  -8  -2  109.94    9.92
 -10  -8  -2  132.50   10.34
 -10  -8  -3  104.60    9.57
 -10  -8  -3   96.97    8.69
 -10  -8  -4  197.41   12.27
 -10  -8  -4  197.28   13.28
 -10  -8  -4  194.93   12.95
 -10  -8  -5  266.66   15.00
 -10  -8  -5  283.96   16.12
 -10  -8  -5  278.94   16.03
 -10  -8  -6   18.23    3.50
 -10  -8  -6   14.73    3.38
 -10  -8  -7  223.54   13.05
 -10  -8  -7  227.50   13.48
 -10  -8  -8   17.38    3.19
 -10  -8  -9   66.79    6.04
 -10  -8 -10   67.68    5.44
 -10  -9   4   68.74    5.53
 -10  -9   3   99.28    7.34
 -10  -9   2   50.95    5.64
 -10  -9   1   73.61    6.90
 -10  -9   0   32.77    4.21
 -10  -9   0   31.63    4.93
 -10  -9  -1  241.30   14.18
 -10  -9  -1  235.52   13.29
 -10  -9  -2   47.43    6.05
 -10  -9  -2   46.70    5.47
 -10  -9  -3  112.21    9.21
 -10  -9  -3  102.45    8.53
 -10  -9  -4  115.13    9.40
 -10  -9  -4  114.23    9.02
 -10  -9  -5   18.83    3.51
 -10  -9  -5   20.20    3.58
 -10  -9  -6   86.52    6.95
 -10  -9  -6   92.04    7.80
 -10  -9  -7   37.78    4.41
 -10  -9  -7   35.11    4.49
 -10  -9  -8   50.29    4.87
 -10  -9  -9  134.17    7.83
 -10 -10   3   -0.27    0.66
 -10 -10   2  209.25   10.62
 -10 -10   1    7.06    1.63
 -10 -10   1    6.23    1.85
 -10 -10   0   82.72    6.84
 -10 -10   0   99.58    6.86
 -10 -10  -1   21.53    3.23
 -10 -10  -1   15.59    2.88
 -10 -10  -2    0.59    0.97
 -10 -10  -2   -1.12    1.55
 -10 -10  -3  248.71   13.78
 -10 -10  -3  301.55   14.60
 -10 -10  -4    2.38    1.63
 -10 -10  -4   -2.36    1.81
 -10 -10  -5   47.30    5.03
 -10 -10  -6   68.89    6.04
 -10 -10  -7   59.71    5.29
 -10 -11   0   99.01    6.29
 -10 -11  -1    6.35    1.71
 -10 -11  -1    8.37    1.99
 -10 -11  -2  114.04    7.19
 -10 -11  -2  117.58    7.38
 -10 -11  -3    2.93    1.46
 -10 -11  -3    1.30    1.19
 -10 -11  -4   55.17    4.93
 -10 -11  -5  103.98    6.81
 -10 -11  -6   10.90    1.91
  11  -6   0  174.72    8.94
  11  -6   1   25.95    3.23
  11  -6   2   53.34    4.65
  11  -6   3   16.25    2.53
  11  -6   4   91.13    5.76
 -11   5   3   40.32    4.02
 -11   5   2   80.69    6.25
 -11   5   1  171.40    9.90
 -11   5   0    3.24    1.44
 -11   5  -1  142.70    9.22
 -11   5  -2   40.49    4.60
 -11   5  -3  129.01    8.50
 -11   5  -4   36.93    3.41
 -11   5  -4   37.98    4.12
 -11   5  -5   -1.46    0.97
 -11   4   5   82.84    5.84
 -11   4   4   52.56    5.07
 -11   4   3   42.53    4.82
 -11   4   2  180.67   11.27
 -11   4   1   10.80    3.05
 -11   4   0  141.39   10.28
 -11   4  -1   77.56    7.54
 -11   4  -2   48.03    5.85
 -11   4  -3  182.97   11.72
 -11   4  -4    1.09    1.50
 -11   4  -5   96.57    6.32
 -11   4  -5  109.23    8.00
 -11   4  -6    6.32    2.16
 -11   4  -7   16.45    2.59
 -11   3   6   55.62    4.79
 -11   3   5   88.09    6.94
 -11   3   4   33.33    4.56
 -11   3   3  101.27    8.54
 -11   3   2    1.08    1.72
 -11   3   1  121.99   10.17
 -11   3   0   53.63    6.60
 -11   3  -1  103.63   10.65
 -11   3  -2   81.18    8.26
 -11   3  -3    4.12    2.85
 -11   3  -4  117.38    9.73
 -11   3  -5   46.36    4.94
 -11   3  -5   57.38    6.22
 -11   3  -6   90.90    7.57
 -11   3  -6   82.20    6.03
 -11   3  -7   72.31    6.19
 -11   3  -8    0.74    1.13
 -11   2   7   50.44    4.44
 -11   2   6  102.45    7.44
 -11   2   5    6.73    2.09
 -11   2   4   30.61    4.74
 -11   2   3   27.91    5.01
 -11   2   2  197.75   13.68
 -11   2   1   23.83    4.52
 -11   2   0  110.62   10.25
 -11   2  -1  191.17   13.93
 -11   2  -2   -2.09    1.93
 -11   2  -3  128.86   11.01
 -11   2  -4   45.56    6.22
 -11   2  -5   18.15    3.43
 -11   2  -5   13.99    3.44
 -11   2  -6  127.94    8.67
 -11   2  -6  138.13   10.12
 -11   2  -7   -0.83    0.97
 -11   2  -7   -1.42    1.84
 -11   2  -8   99.95    7.27
 -11   2  -9   14.07    2.23
 -11   1   7  125.17    7.89
 -11   1   6    3.18    1.61
 -11   1   5  217.10   13.12
 -11   1   4  113.48    9.68
 -11   1   3   71.78    8.01
 -11   1   2   12.19    3.69
 -11   1   1    2.80    2.18
 -11   1   0  403.84   22.19
 -11   1  -1    1.03    2.16
 -11   1  -2   79.31    9.03
 -11   1  -3  198.62   14.44
 -11   1  -4   26.81    4.41
 -11   1  -5  116.80    9.33
 -11   1  -5  120.41   10.47
 -11   1  -6    0.48    1.23
 -11   1  -6    1.91    1.51
 -11   1  -7   80.47    7.46
 -11   1  -7   76.95    6.46
 -11   1  -8   33.74    4.29
 -11   1  -8   30.43    3.51
 -11   1  -9   58.54    5.12
 -11   0   8  138.71    7.59
 -11   0   7   -0.07    0.96
 -11   0   6  260.20   13.98
 -11   0   5   39.69    5.50
 -11   0   4   32.50    5.00
 -11   0   3  203.20   14.20
 -11   0   2   23.57    4.97
 -11   0   1  130.05   11.65
 -11   0   0   14.91    4.46
 -11   0  -1   67.00    8.23
 -11   0  -2  234.76   16.26
 -11   0  -3   64.70    8.20
 -11   0  -4  114.16   10.79
 -11   0  -5   23.87    4.37
 -11   0  -5   23.98    4.54
 -11   0  -6  250.01   14.35
 -11   0  -6  247.19   15.13
 -11   0  -7   42.49    5.44
 -11   0  -7   45.10    5.16
 -11   0  -8   37.45    4.69
 -11   0  -8   40.80    4.47
 -11   0  -9  145.51    8.68
[truncated: 174,210 more chars]
