# Supplementary material
Source: MDPI journal article supplement (https://www.mdpi.com/2304-6740/12/3/73)
Supplement: s1 [file s1 › Supporting Information.pdf]

## Supporting Information

for

# In situ synthesis of hexadentate cyclometalated Ir(III) complexes as photocatalysts for the oxidation of sulfides into sulfoxides in water

Jing-Yan Fan <sup>1</sup>, Su-Yang Yao <sup>2,\*</sup> and Bao-Hui Ye <sup>1,\*</sup>

<sup>1</sup> MOE Key Laboratory of Bioinorganic and Synthetic Chemistry, School of Chemistry, Sun Yat-sen University, Guangzhou 510275, Guangdong, China.

<sup>2</sup> School of Chemistry and Materials Science, Guangdong University of Education, Guangzhou 510303, China.

## S1. NMR and MS Figures for Ir(III) Complexes

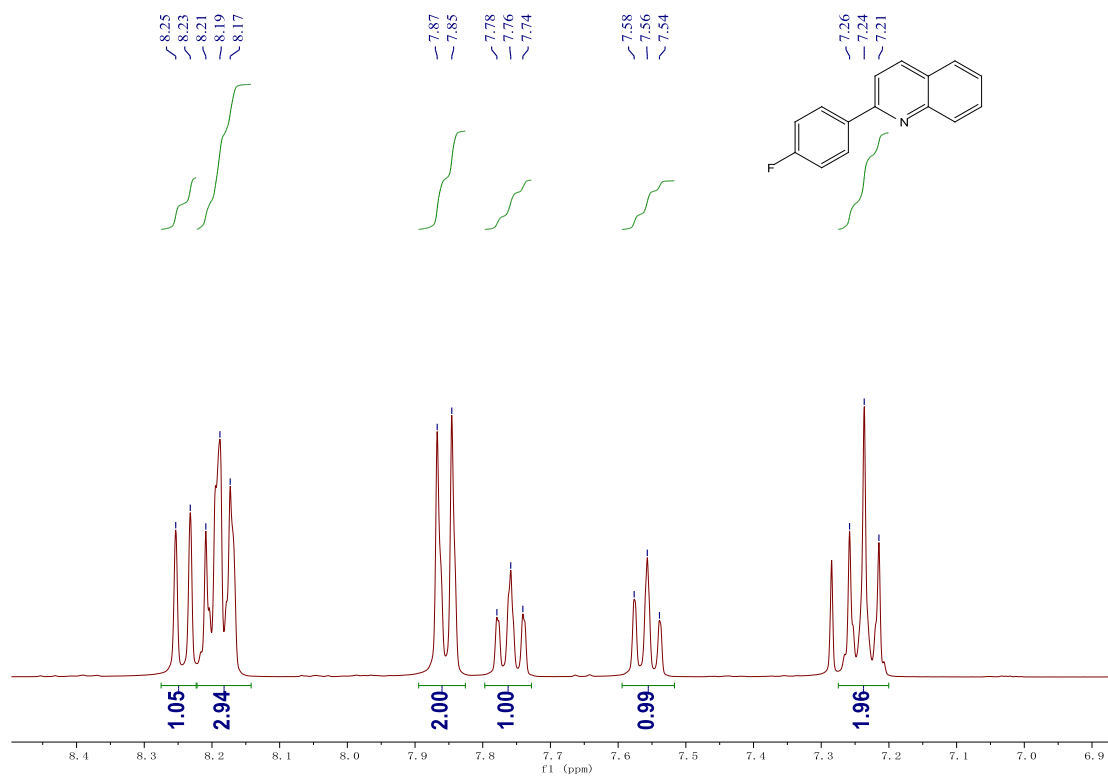

Figure S1. <sup>1</sup>H NMR spectra of fpq in CDCl<sub>3</sub>.

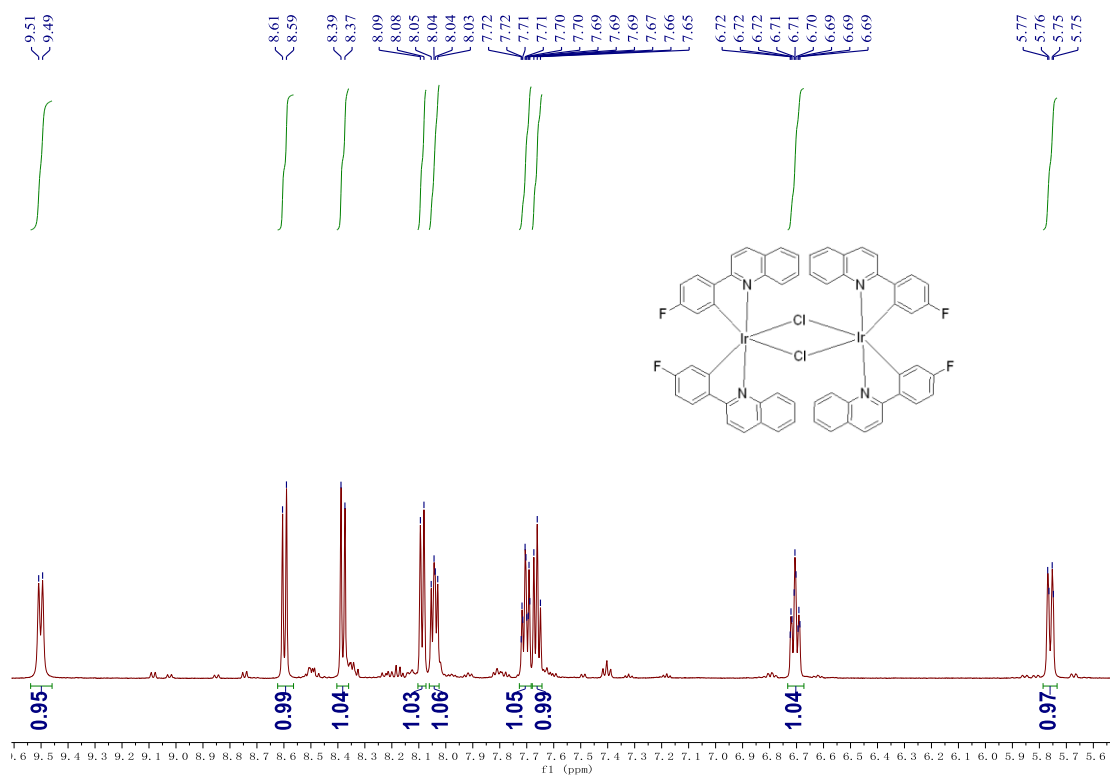

**Figure S2.**  $^1\text{H}$  NMR spectra of  $[\text{Ir}(\text{fpq})_2\text{Cl}]_2$  in  $\text{DMSO-}d_6$ .

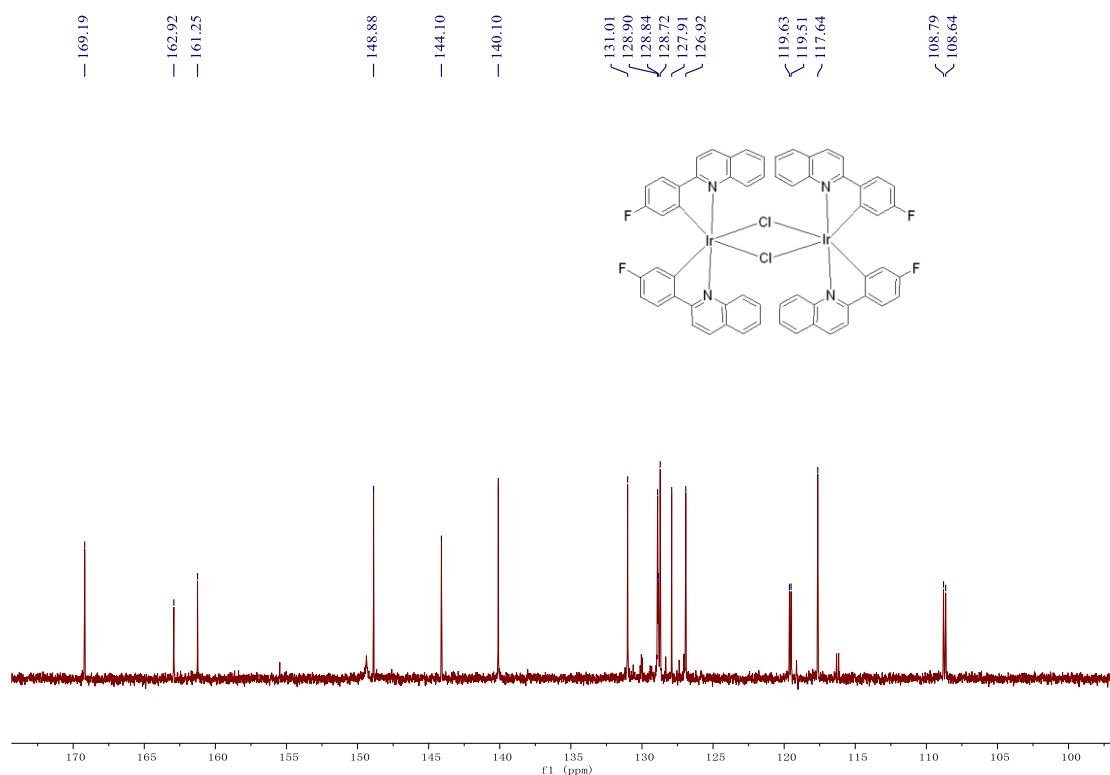

**Figure S3.**  $^{13}\text{C}$  NMR spectra of  $[\text{Ir}(\text{fpq})_2\text{Cl}]_2$  in  $\text{DMSO-}d_6$ .

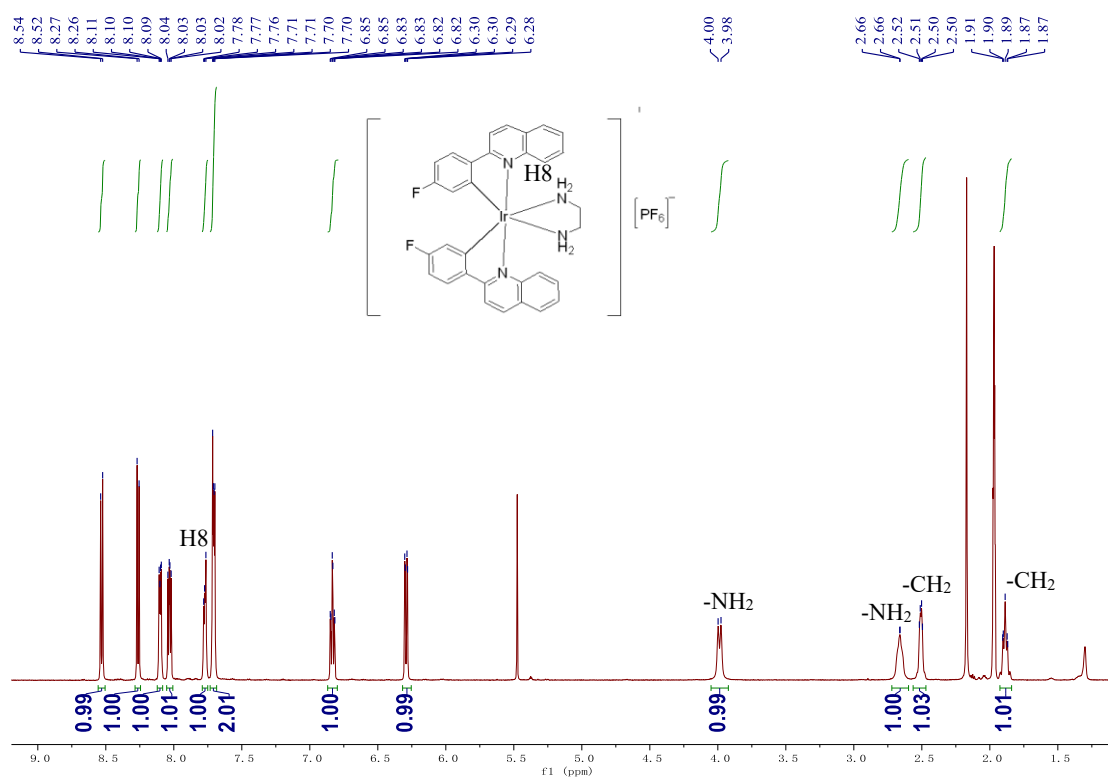

**Figure S4.** <sup>1</sup>H NMR spectra of [Ir(fpq)<sub>2</sub>(en)](PF<sub>6</sub>) (**1a**) in CD<sub>3</sub>CN.

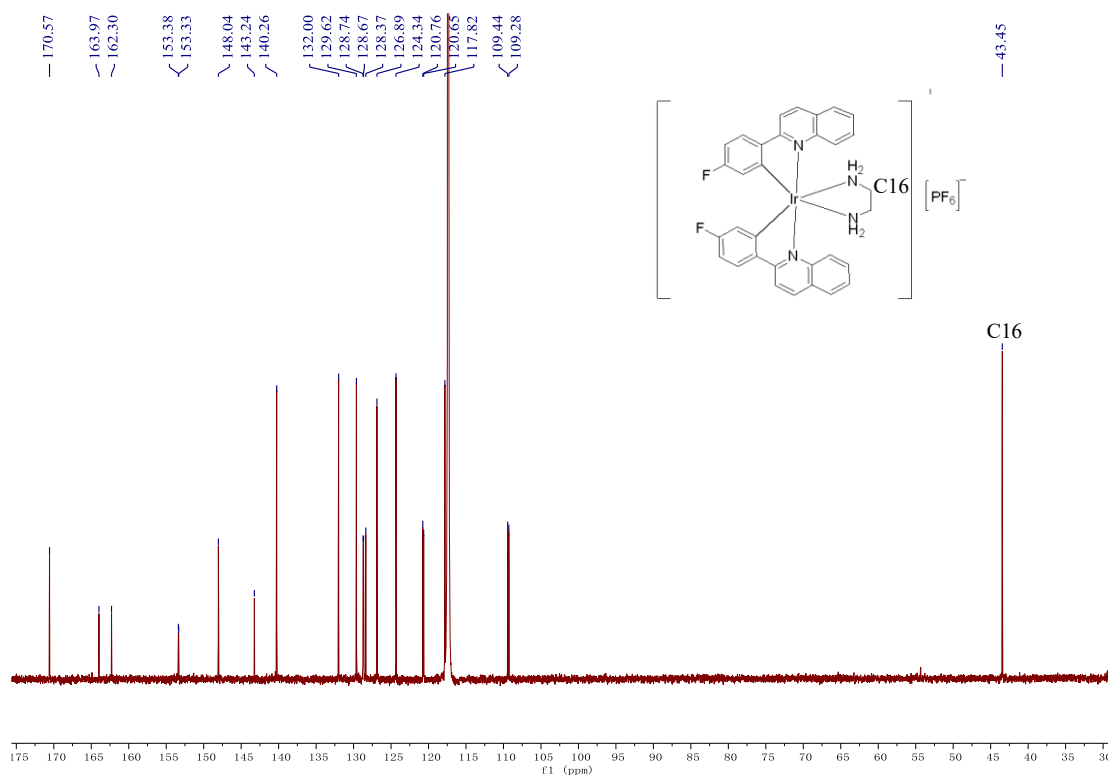

**Figure S5.** <sup>13</sup>C NMR spectra of [Ir(fpq)<sub>2</sub>(en)](PF<sub>6</sub>) (**1a**) in CD<sub>3</sub>CN.

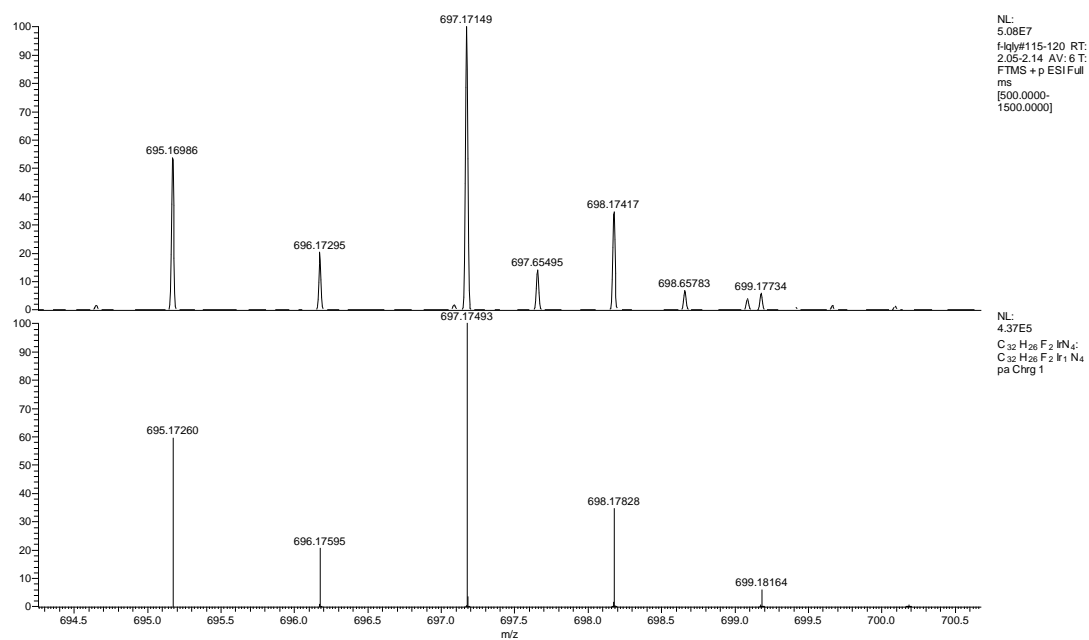

**Figure S6.** HRMS of  $[\text{Ir}(\text{fpq})_2(\text{en})](\text{PF}_6)$  (up) and calculated for  $[\text{Ir}(\text{fpq})_2(\text{en})]^+$  (down).

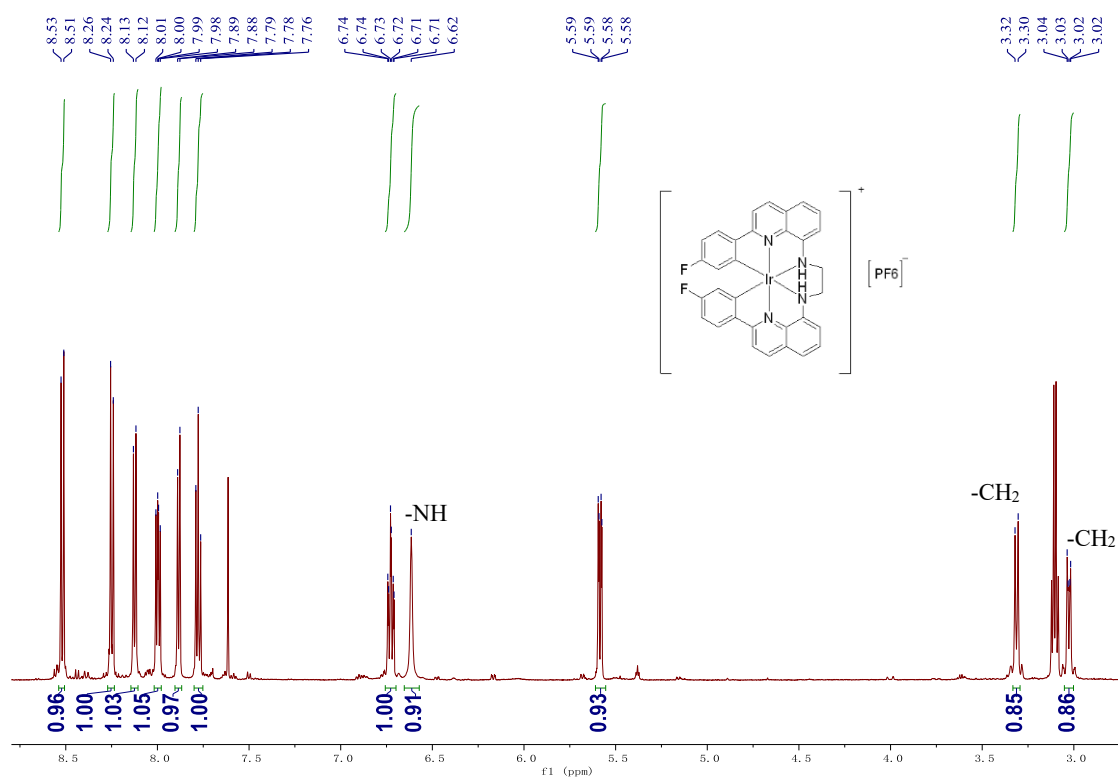

**Figure S7.** <sup>1</sup>H NMR spectra of [Ir(bfpqen)](PF<sub>6</sub>) (1) in CD<sub>3</sub>CN.

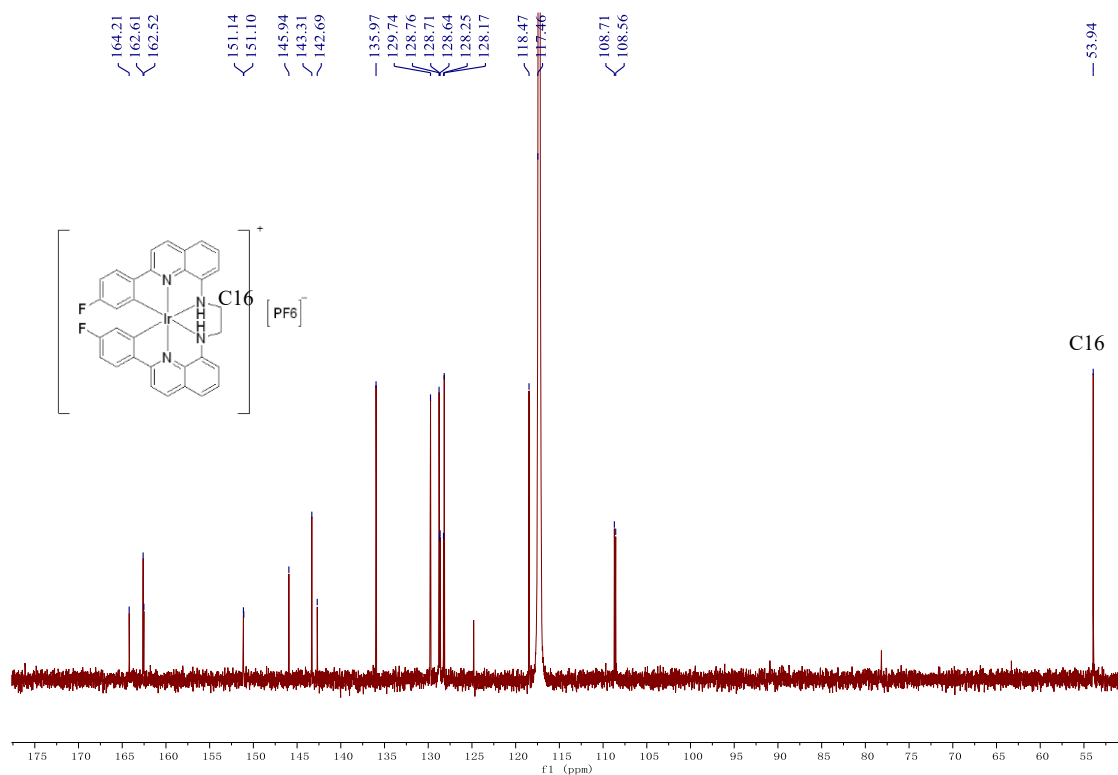

**Figure S8.** <sup>13</sup>C NMR spectra of [Ir(bfpqen)](PF<sub>6</sub>) (1) in CD<sub>3</sub>CN.

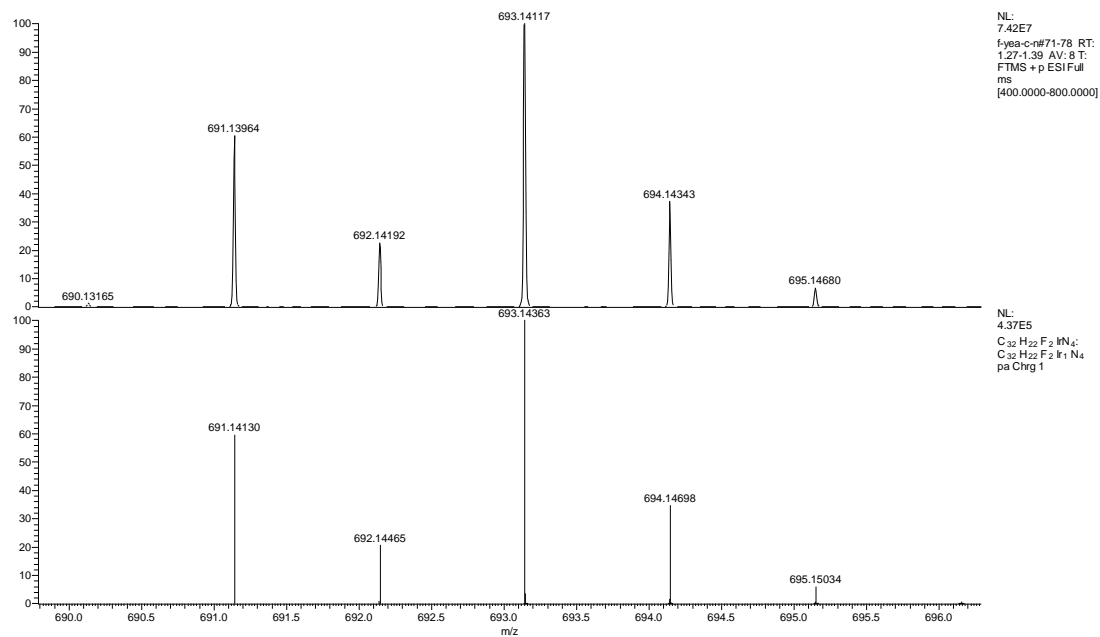

**Figure S9.** HRMS of  $[\text{Ir}(\text{bfpqen})](\text{PF}_6)$  (up) and calculated for  $[\text{Ir}(\text{bfpqen})]^+$  (down).

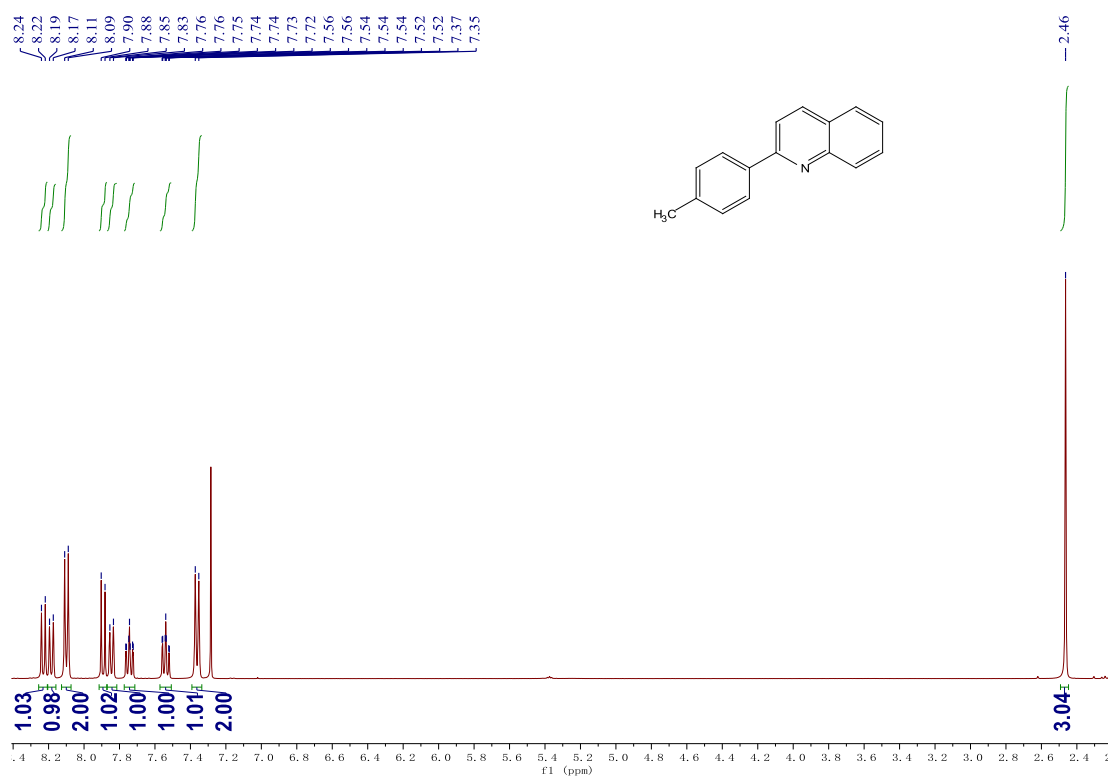

**Figure S10.**  $^1\text{H}$  NMR spectra of **tq** in  $\text{CDCl}_3$ .

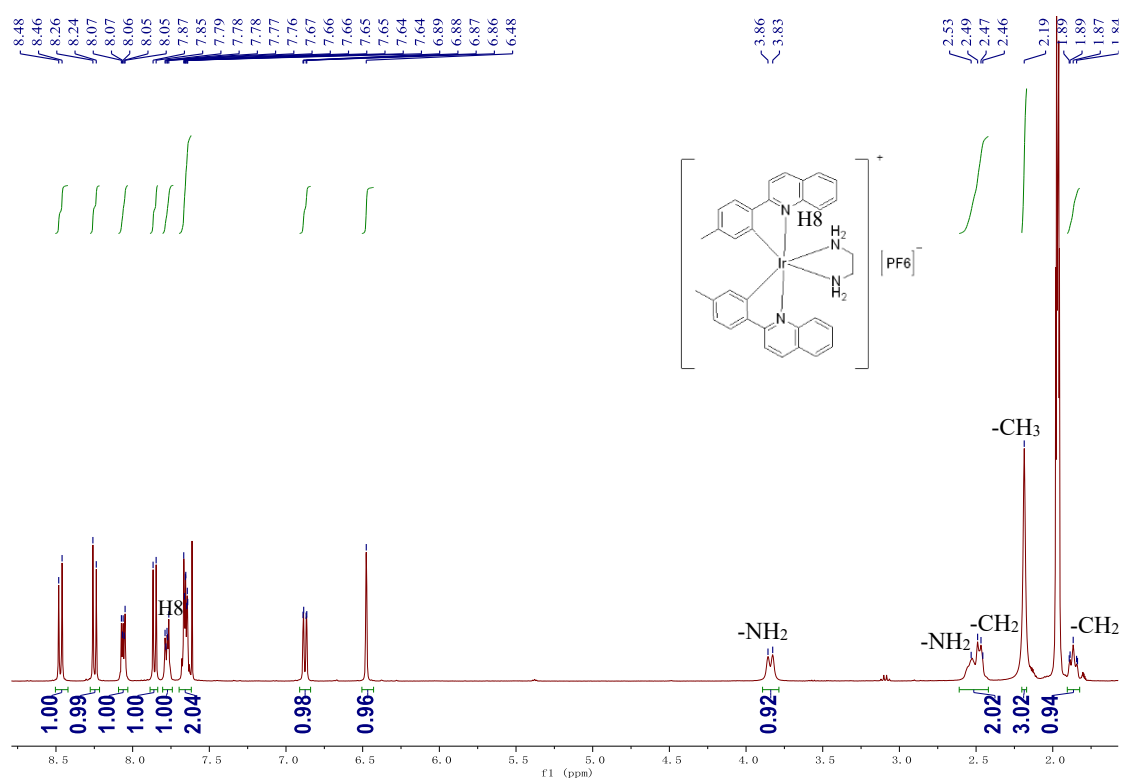

**Figure S11.** <sup>1</sup>H NMR spectra of [Ir(tq)<sub>2</sub>(en)](PF<sub>6</sub>) (**2a**) in CD<sub>3</sub>CN.

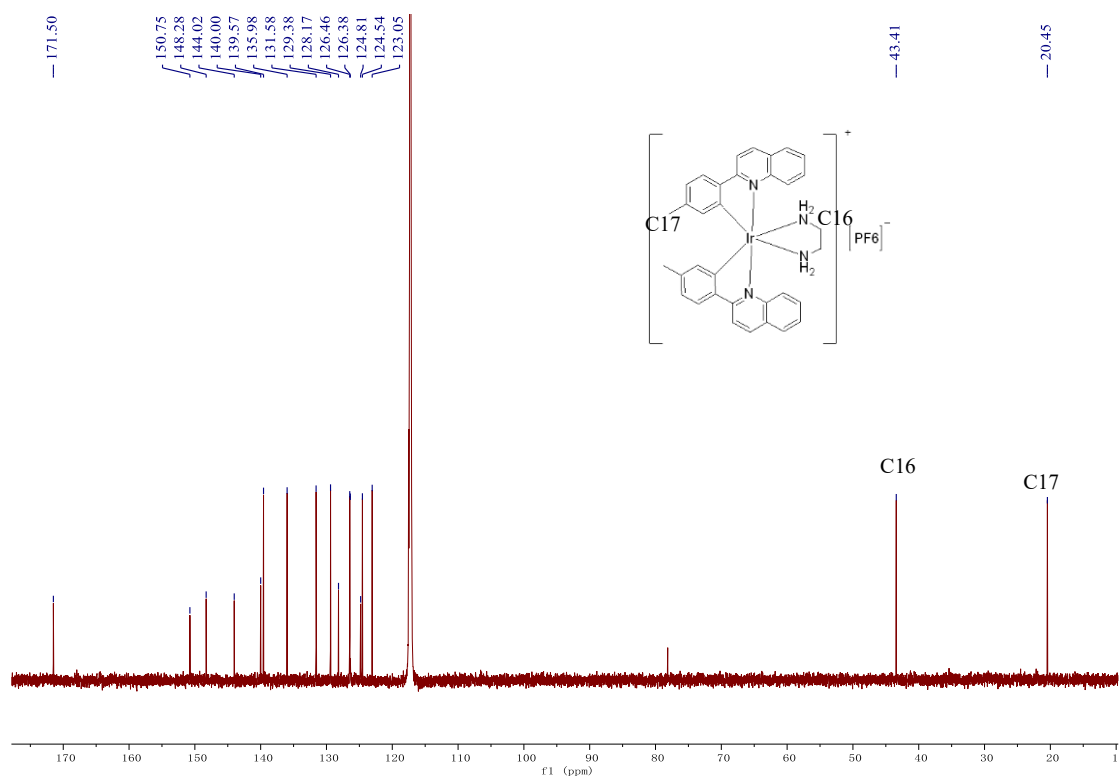

**Figure S12.** <sup>13</sup>C NMR spectra of [Ir(tq)<sub>2</sub>(en)](PF<sub>6</sub>) (**2a**) in CD<sub>3</sub>CN.

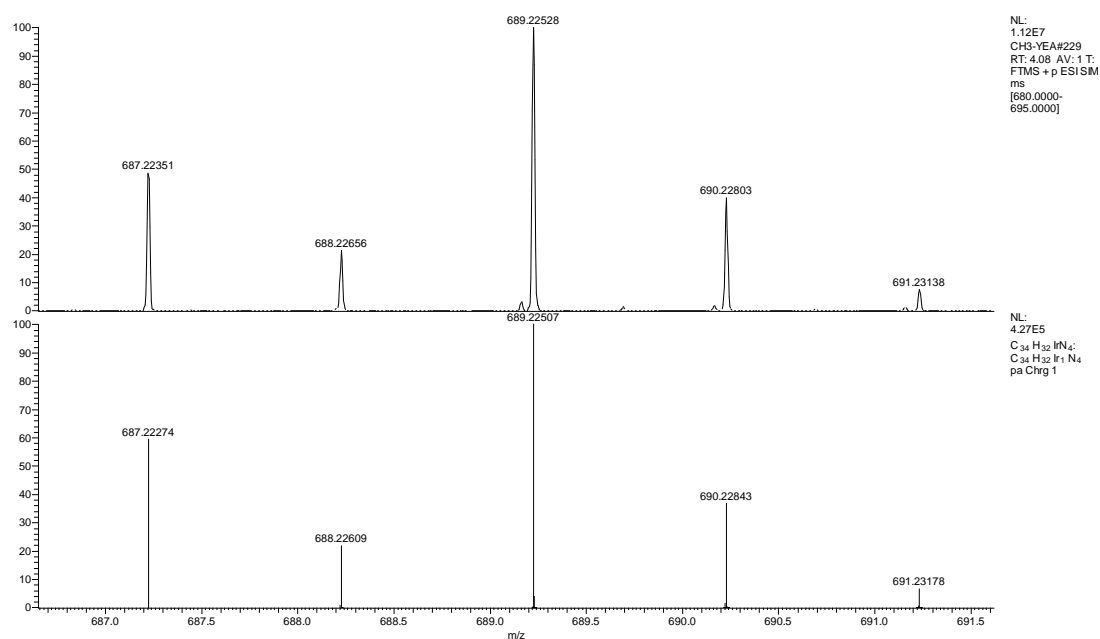

**Figure S13.** HRMS of  $[\text{Ir}(\text{tq})_2(\text{en})](\text{PF}_6)$  (up) and calculated for  $[\text{Ir}(\text{tq})_2(\text{en})]^+$  (down).

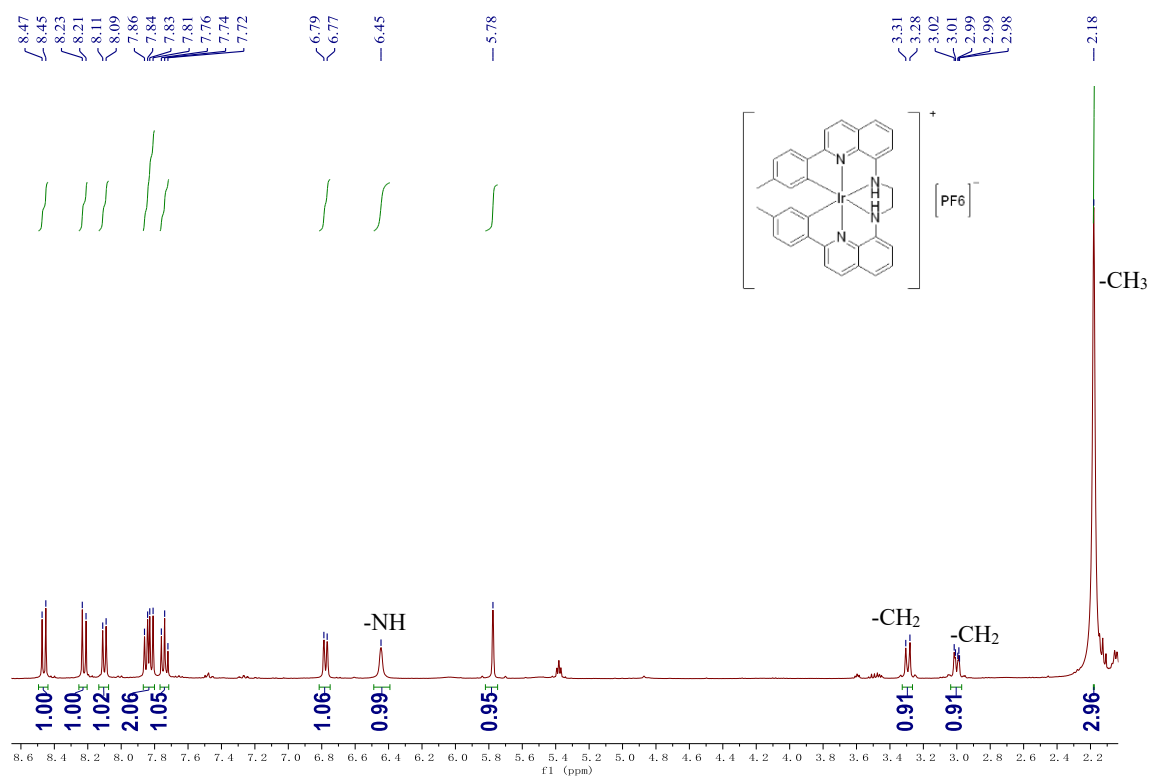

**Figure S14.**  $^1\text{H}$  NMR spectra of  $[\text{Ir}(\text{btqen})](\text{PF}_6)$  (2) in  $\text{CD}_3\text{CN}$ .

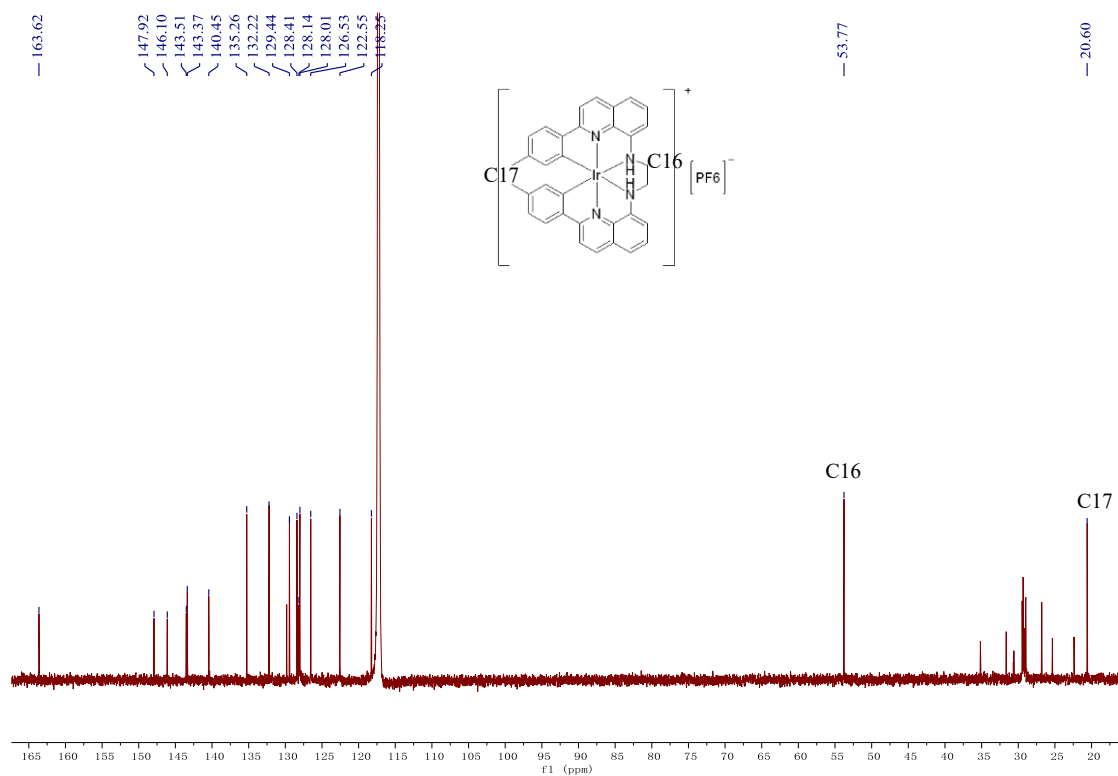

**Figure S15.**  $^{13}\text{C}$  NMR spectra of  $[\text{Ir}(\text{btqen})](\text{PF}_6)$  (**2**) in  $\text{CD}_3\text{CN}$ .

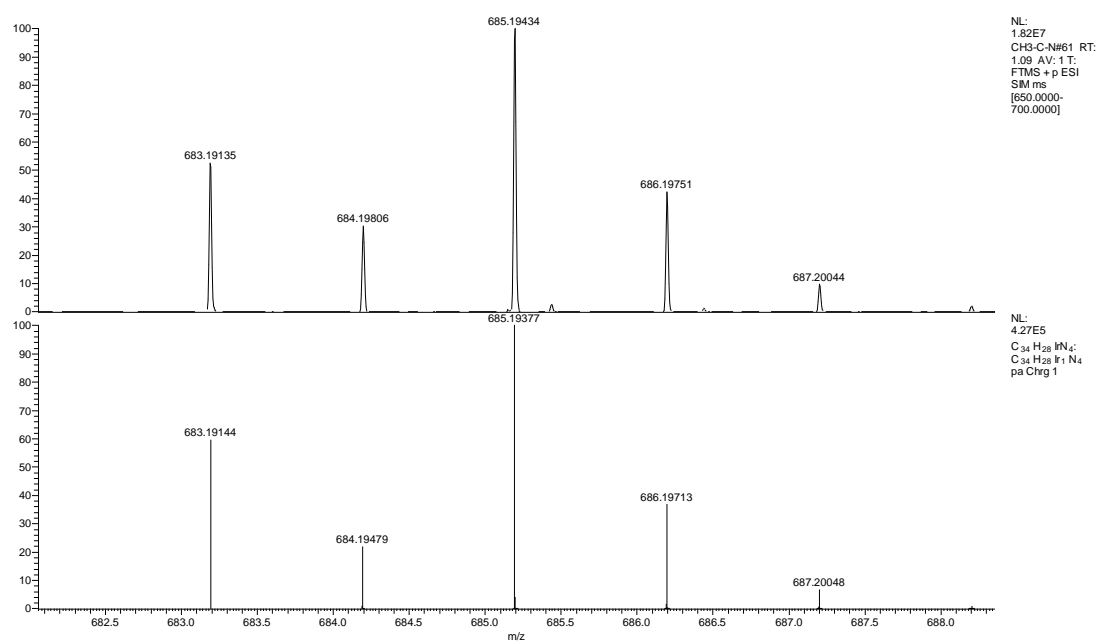

**Figure S16.** HRMS of  $[\text{Ir}(\text{btqen})](\text{PF}_6)$  (up) and calculated for  $[\text{Ir}(\text{btqen})]^+$  (down).

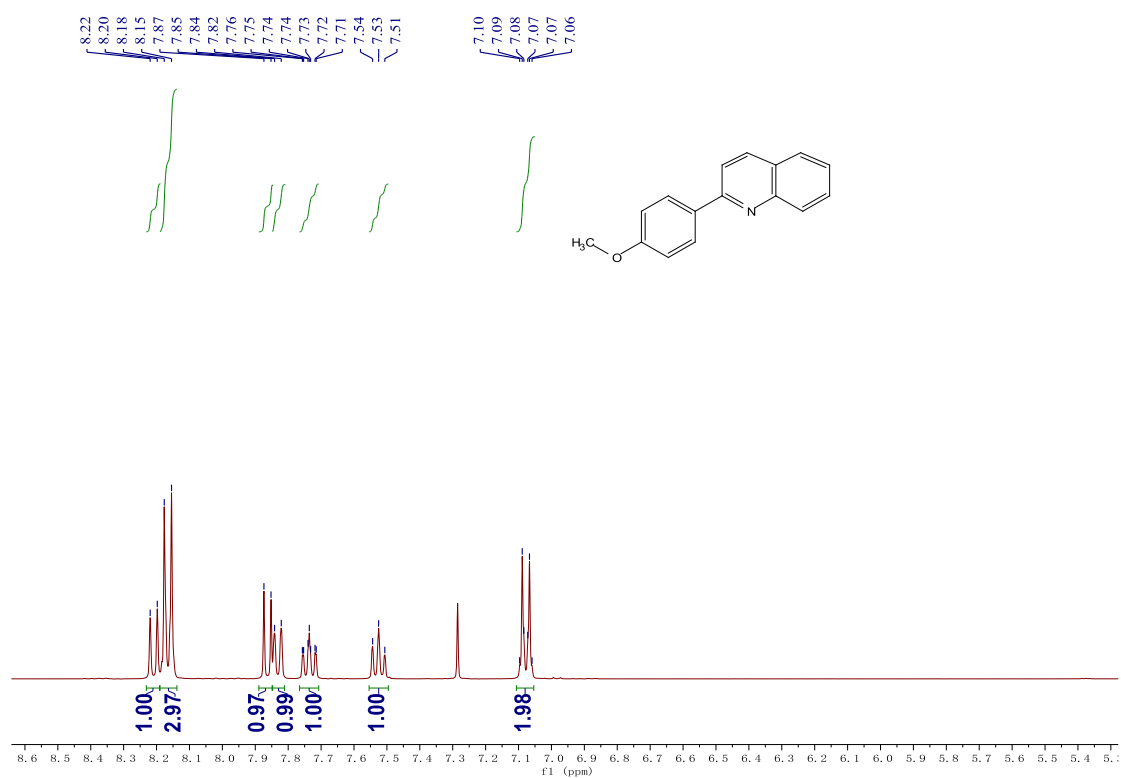

**Figure S17.** <sup>1</sup>H NMR spectra of **mpq** in CDCl<sub>3</sub>.

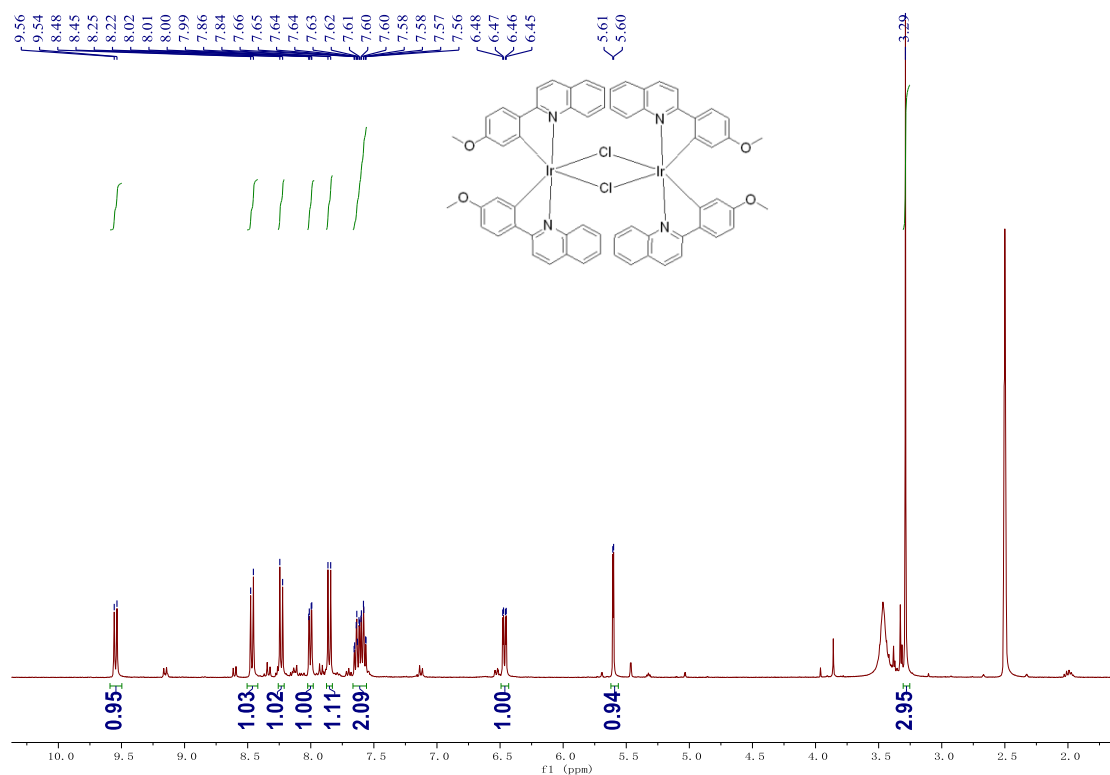

**Figure S18.** <sup>1</sup>H NMR spectra of [Ir(**mpq**)<sub>2</sub>Cl]<sub>2</sub> in DMSO-*d*<sub>6</sub>.

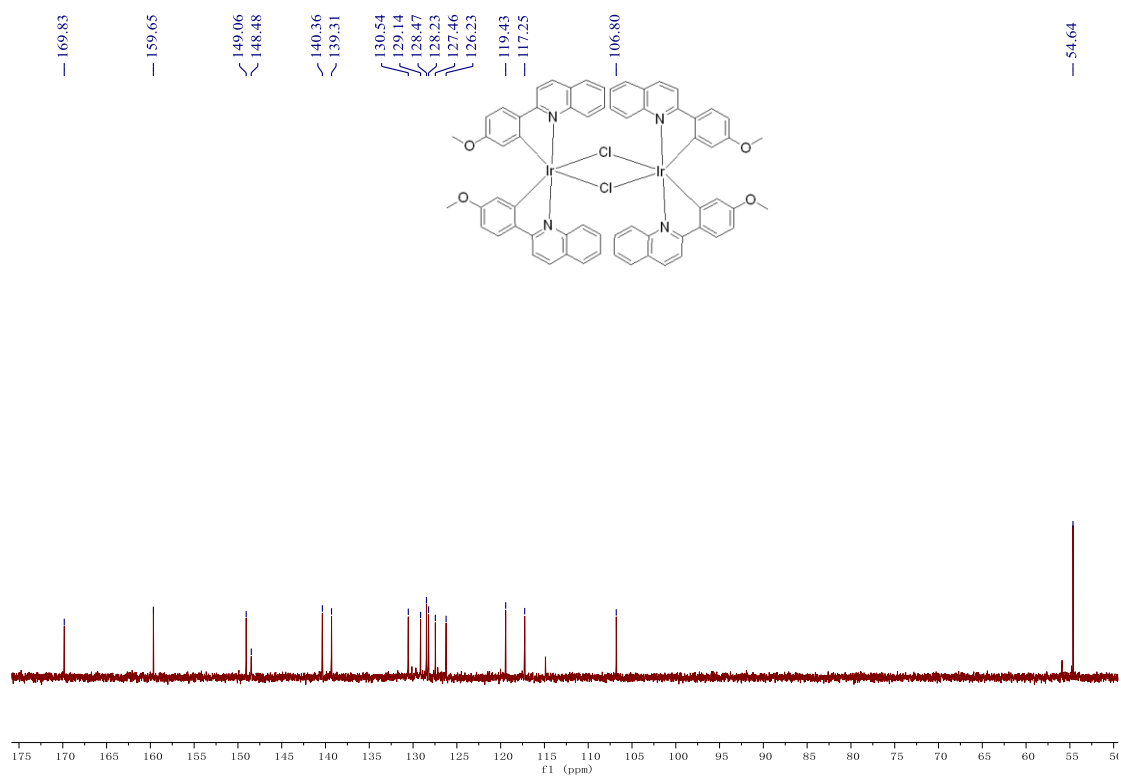

**Figure S19.** <sup>13</sup>C NMR spectra of [Ir(mpq)<sub>2</sub>Cl]<sub>2</sub> in DMSO-*d*<sub>6</sub>.

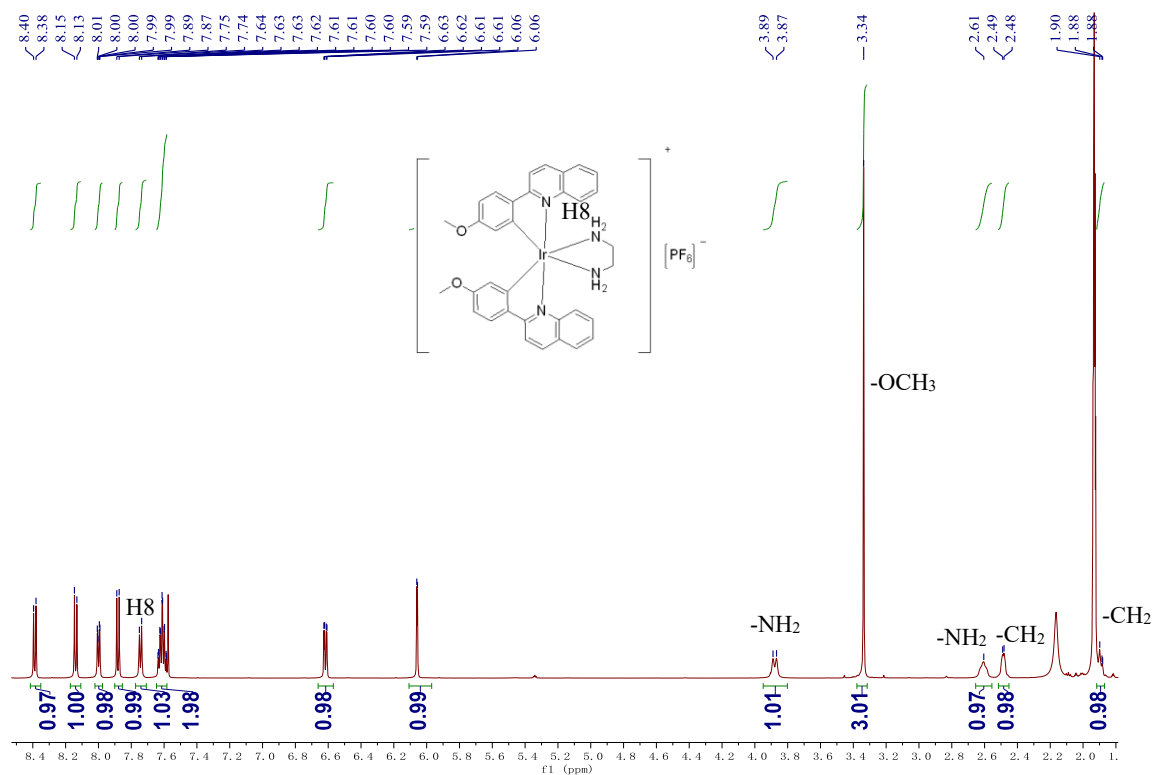

**Figure S20.** <sup>1</sup>H NMR spectra of [Ir(mpq)<sub>2</sub>(en)](PF<sub>6</sub>) (**3a**) in CD<sub>3</sub>CN.

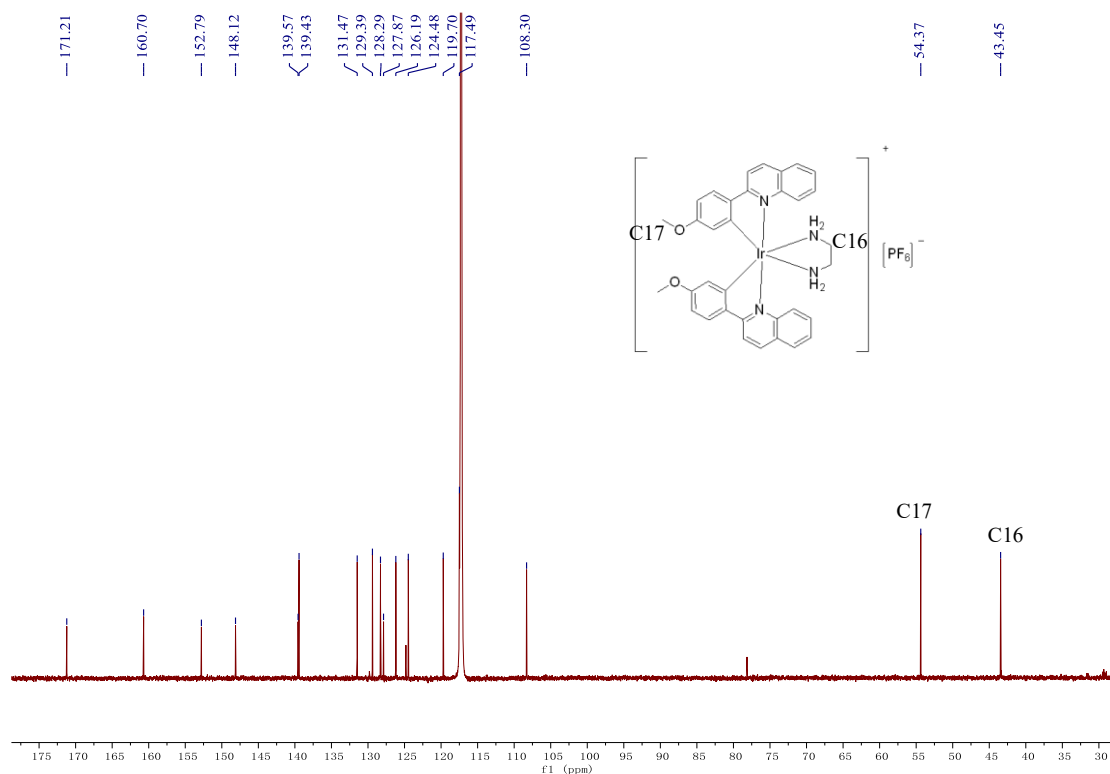

**Figure S21.**  $^{13}\text{C}$  NMR spectra of  $[\text{Ir}(\text{mpq})_2(\text{en})](\text{PF}_6)$  (**3a**) in  $\text{CD}_3\text{CN}$ .

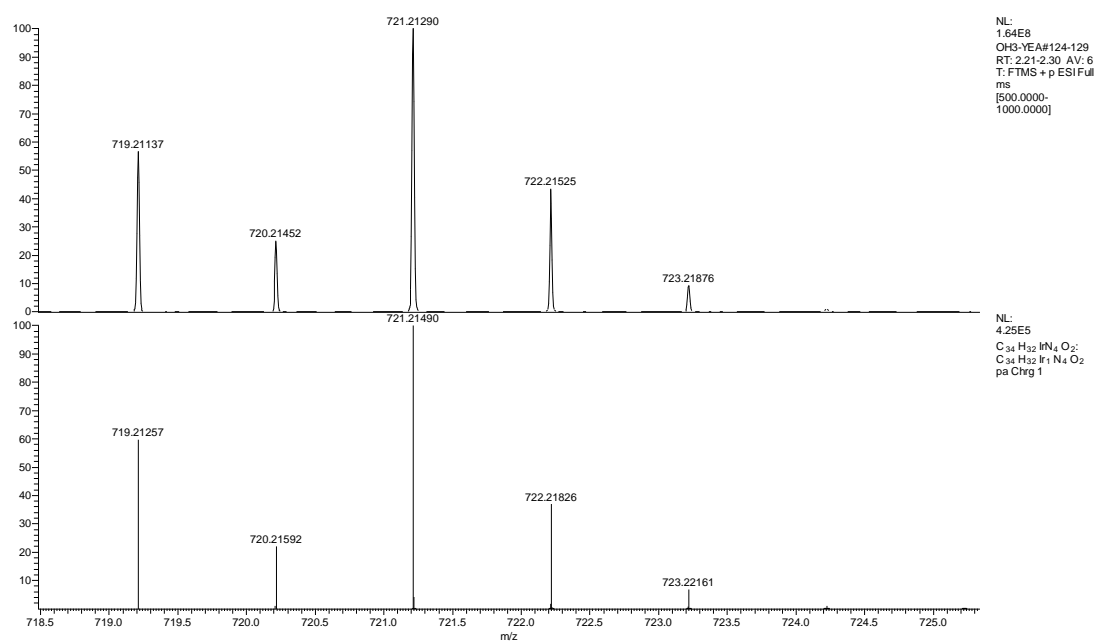

**Figure S22.** HRMS of  $[\text{Ir}(\text{mpq})_2(\text{en})](\text{PF}_6)$  (up) and calculated for  $[\text{Ir}(\text{mpq})_2(\text{en})]^+$  (down).

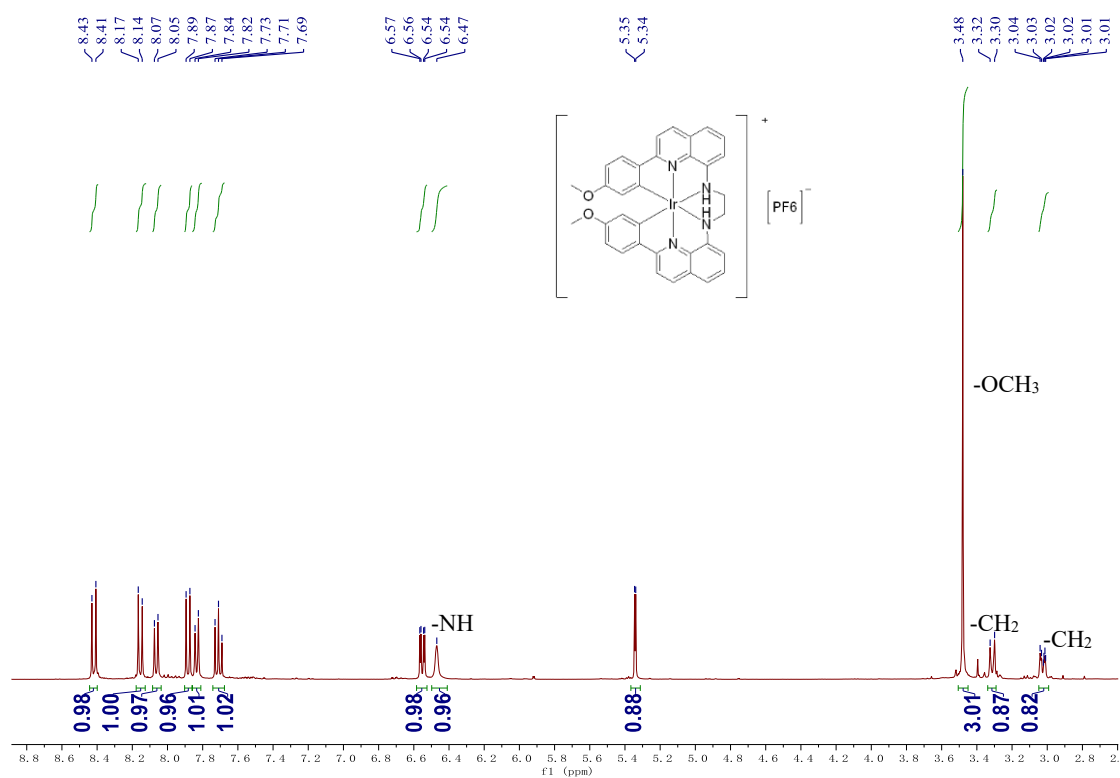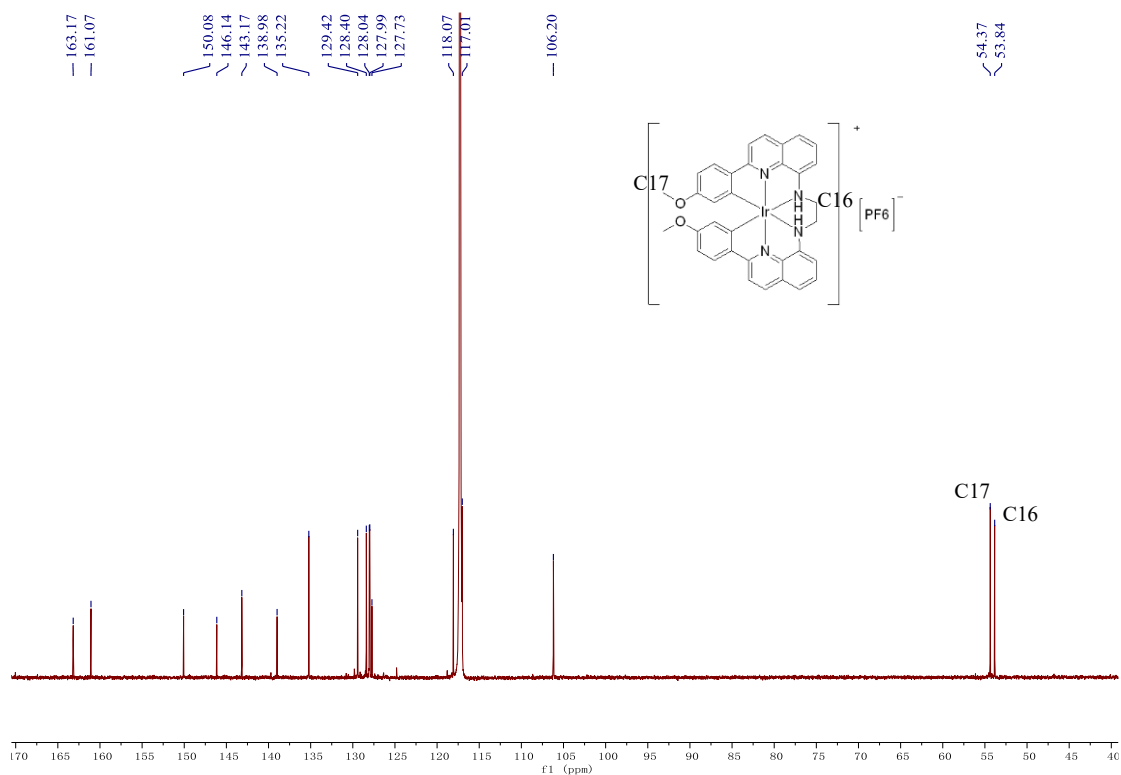

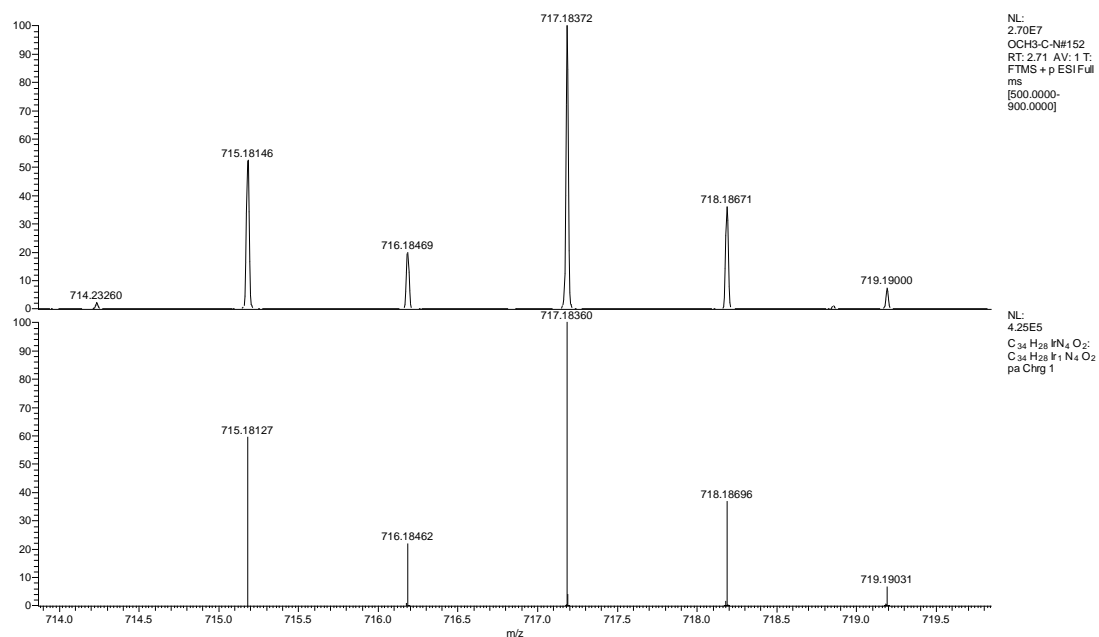

Figure S25. HRMS of  $[\text{Ir}(\text{bmpqen})](\text{PF}_6)$  (up) and calculated for  $[\text{Ir}(\text{bmpqen})]^+$  (down).

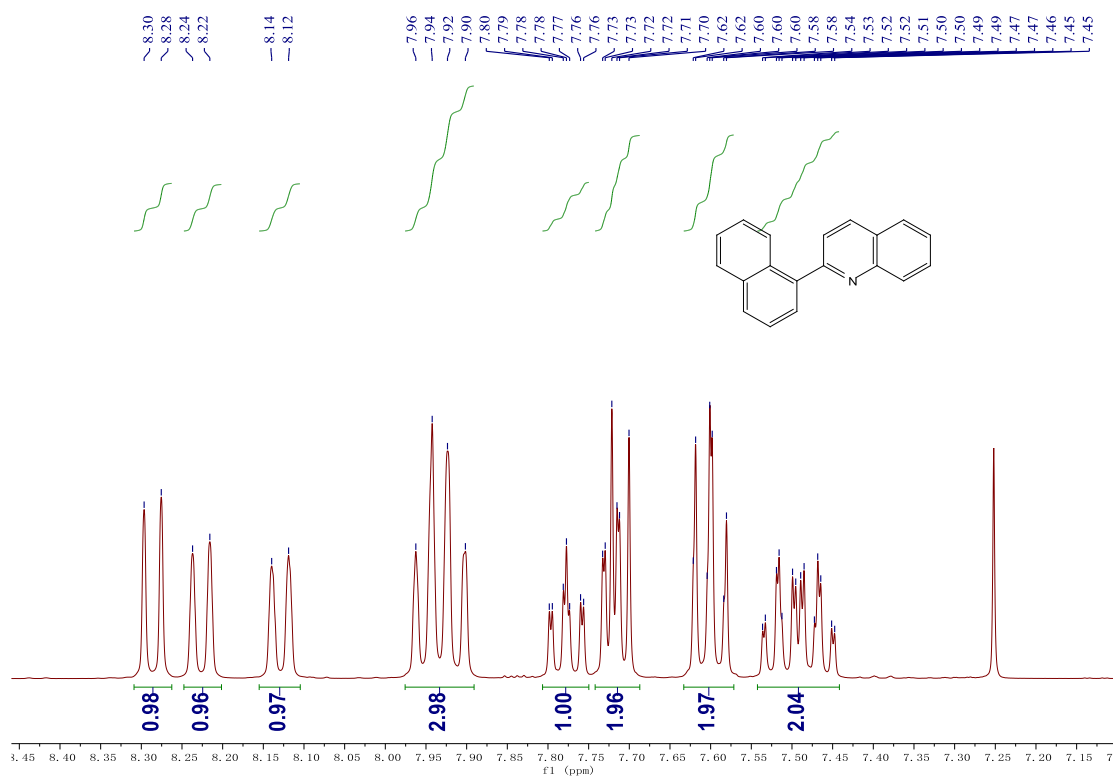

Figure S26.  $^1\text{H}$  NMR spectra of **nq** in  $\text{CDCl}_3$ .

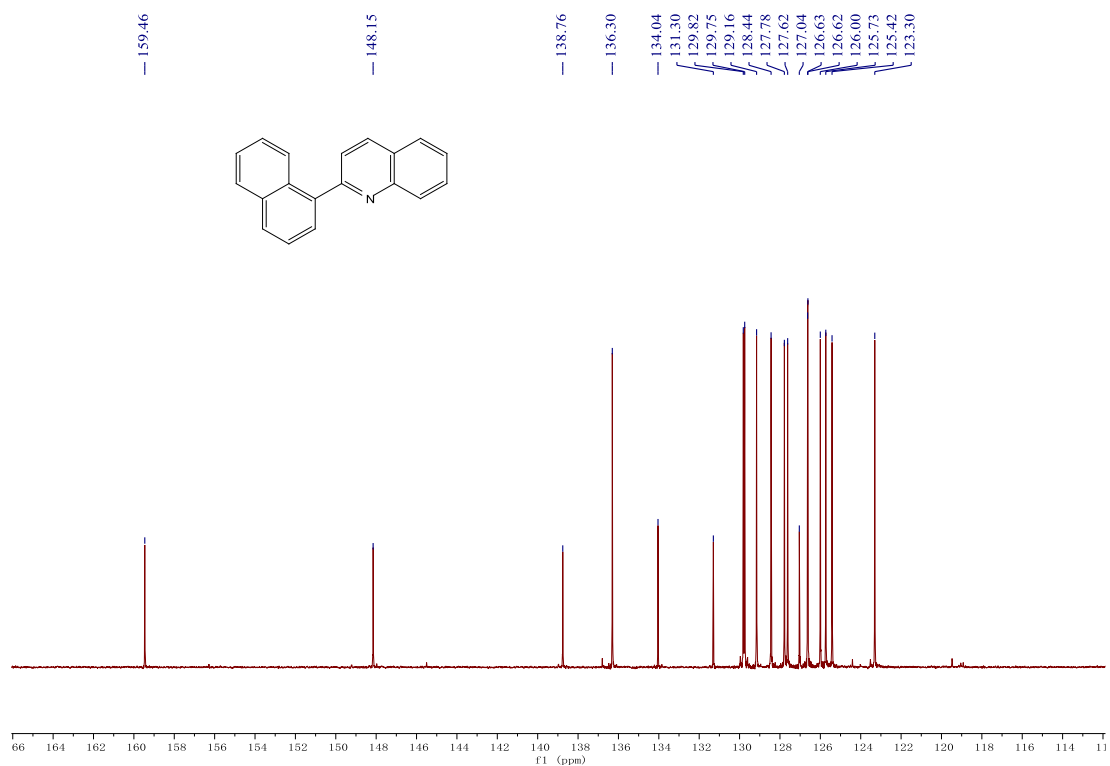

**Figure S27.** <sup>13</sup>C NMR spectra of **nq** in CDCl<sub>3</sub>.

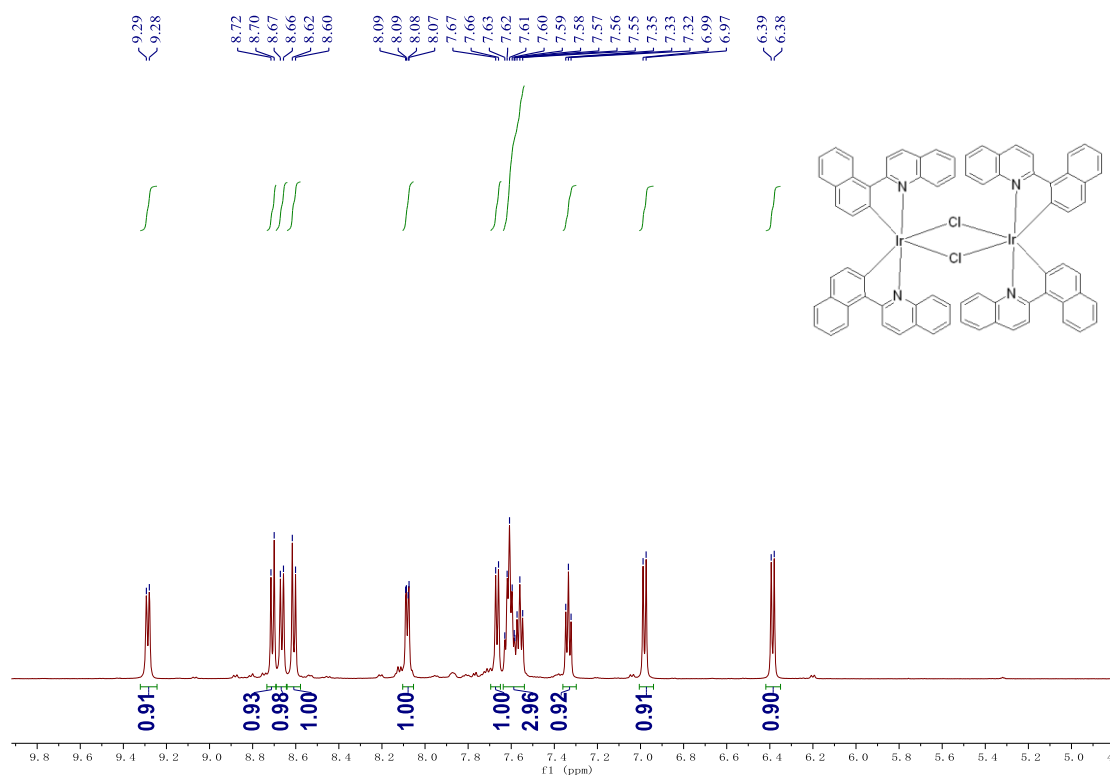

**Figure S28.** <sup>1</sup>H NMR spectra of **[Ir(nq)<sub>2</sub>Cl]<sub>2</sub>** in DMSO-*d*<sub>6</sub>.

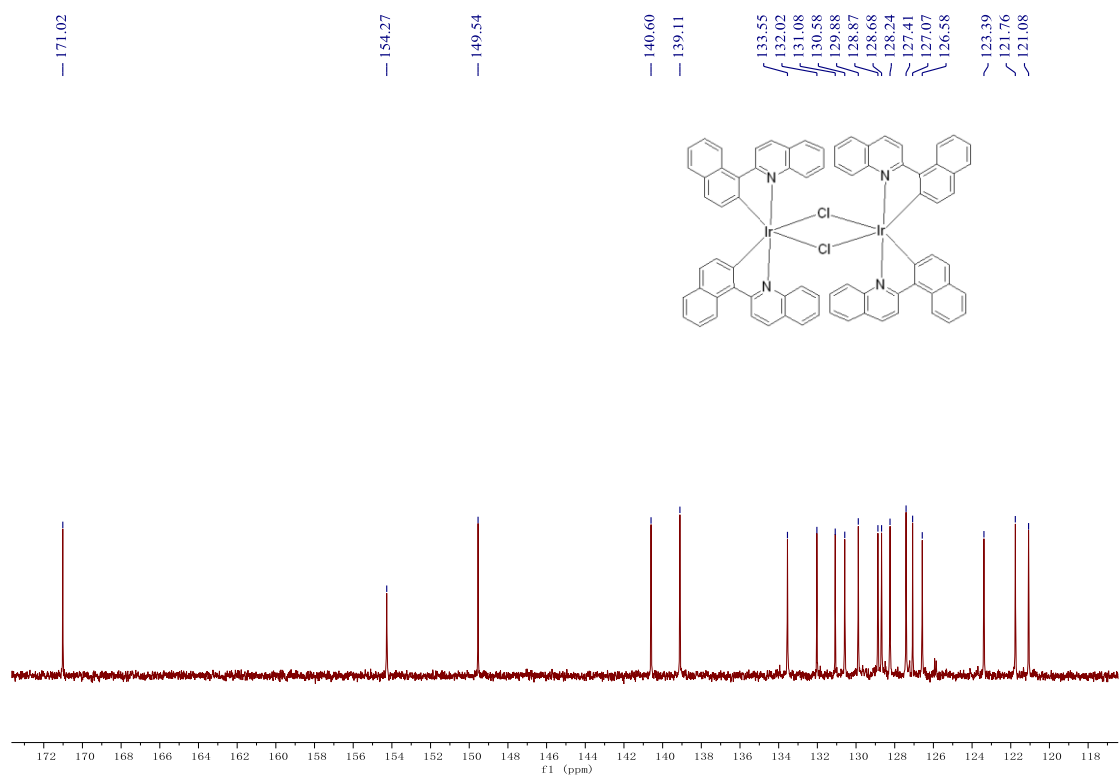

**Figure 29.**  $^{13}\text{C}$  NMR spectra of  $[\text{Ir}(\text{nq})_2\text{Cl}]_2$  in  $\text{DMSO}-d_6$ .

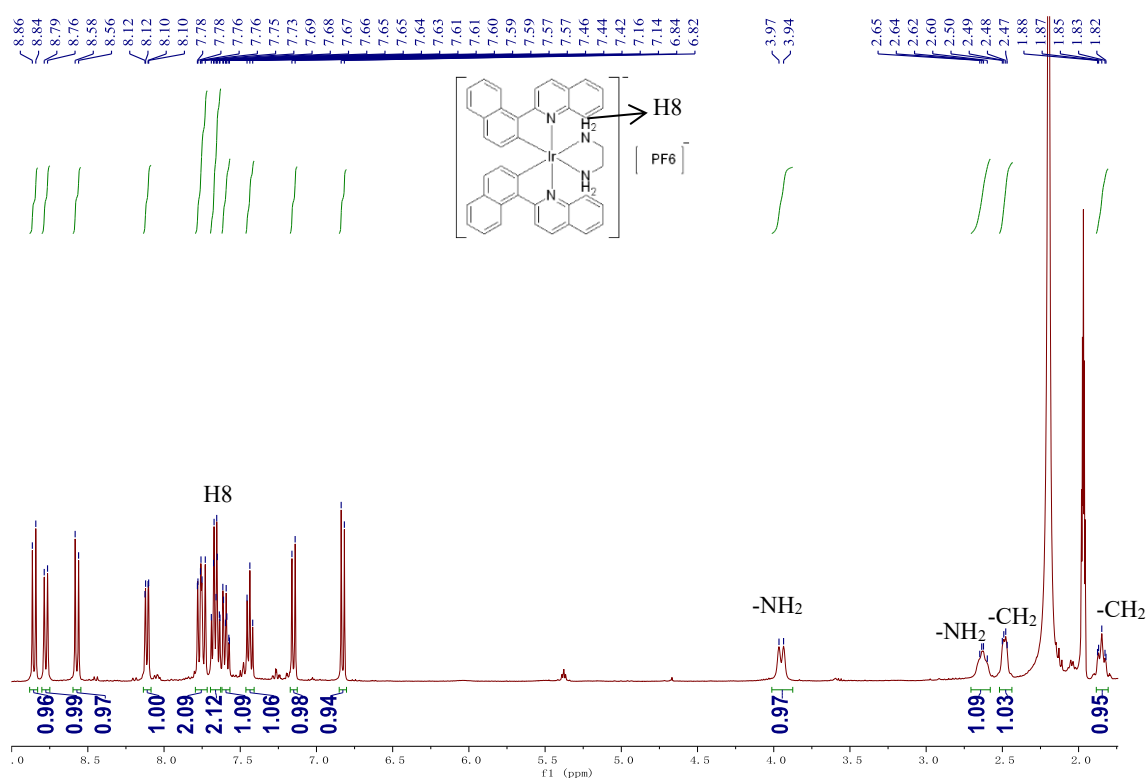

**Figure S30.**  $^1\text{H}$  NMR spectra of  $[\text{Ir}(\text{nq})_2(\text{en})](\text{PF}_6)$  (**4a**) in  $\text{CD}_3\text{CN}$ .

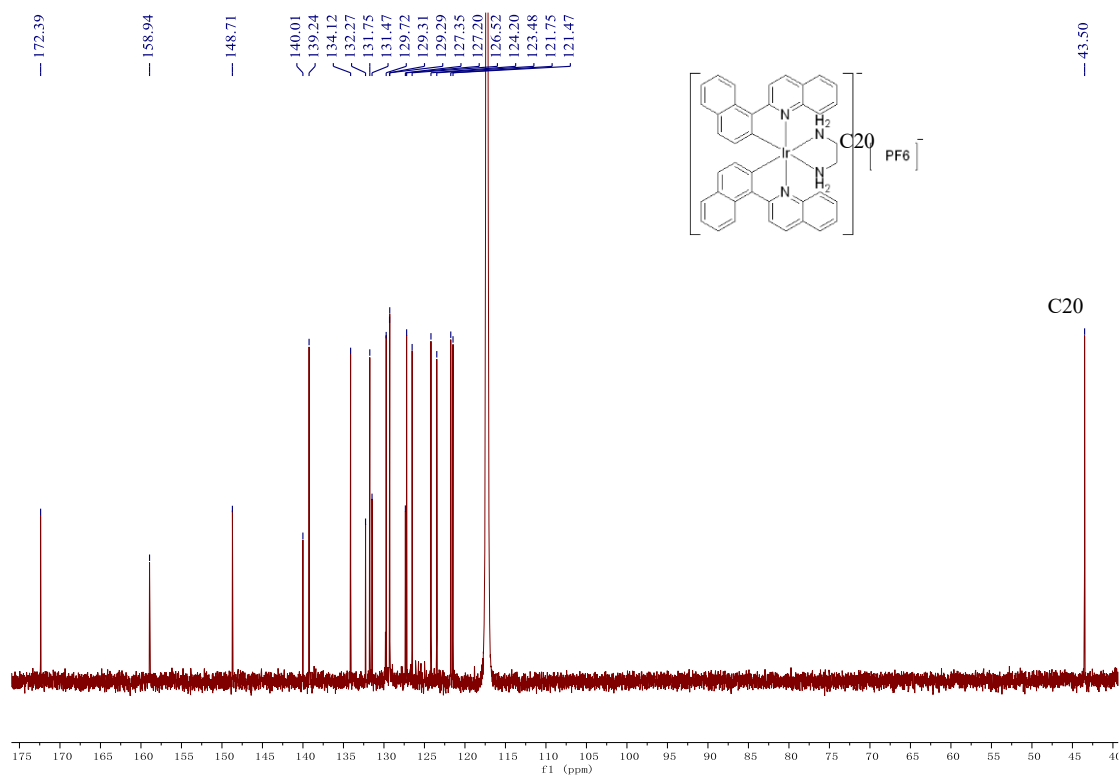

**Figure S31.**  $^{13}\text{C}$  NMR spectra of  $[\text{Ir}(\text{nq})_2(\text{en})](\text{PF}_6)$  (4a) in  $\text{CD}_3\text{CN}$ .

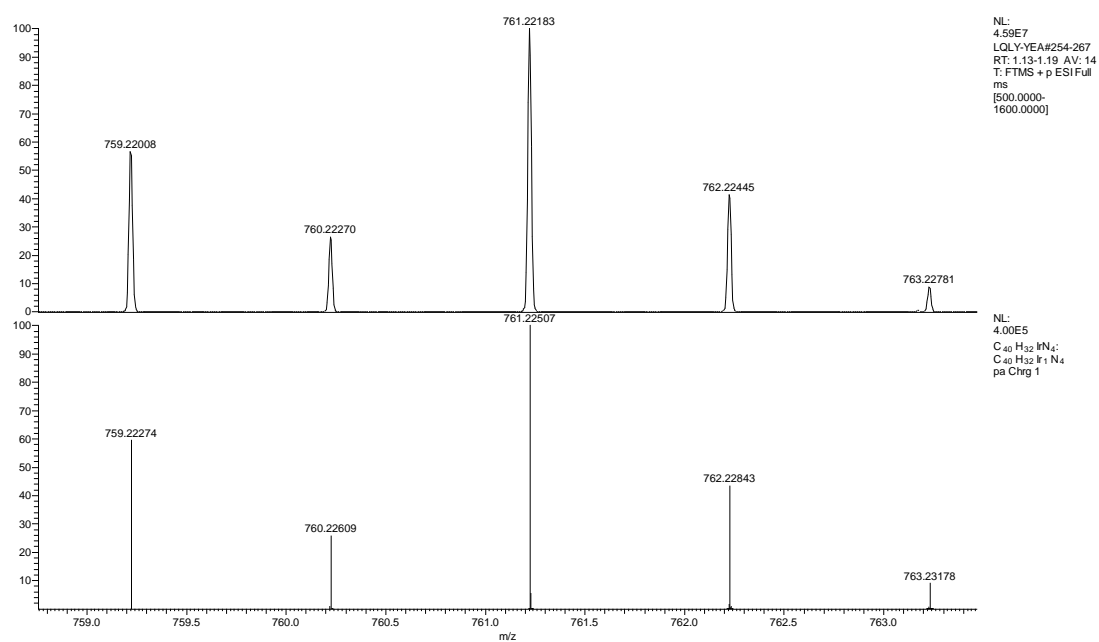

**Figure S32.** HRMS of  $[\text{Ir}(\text{nq})_2(\text{en})](\text{PF}_6)$  (up) and calculated for  $[\text{Ir}(\text{nq})_2(\text{en})]^+$  (down).

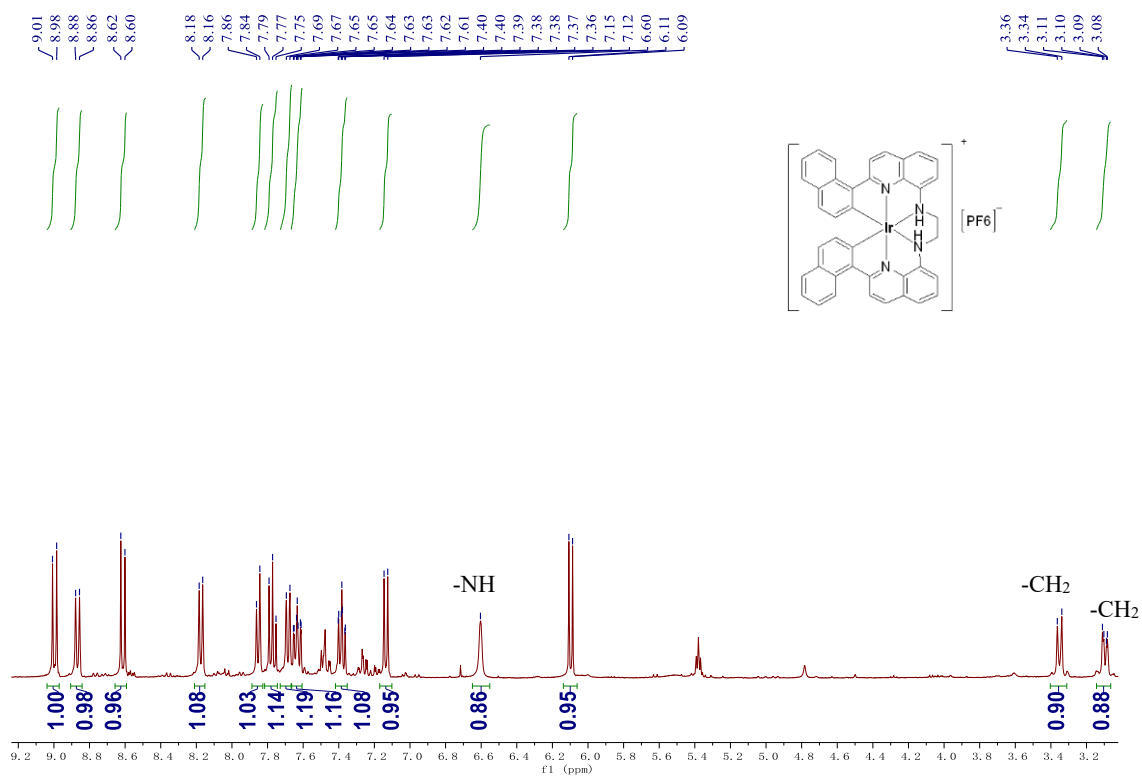

**Figure S33.** <sup>1</sup>H NMR spectra of [Ir(bnqen)](PF<sub>6</sub>) (4) in CD<sub>3</sub>CN.

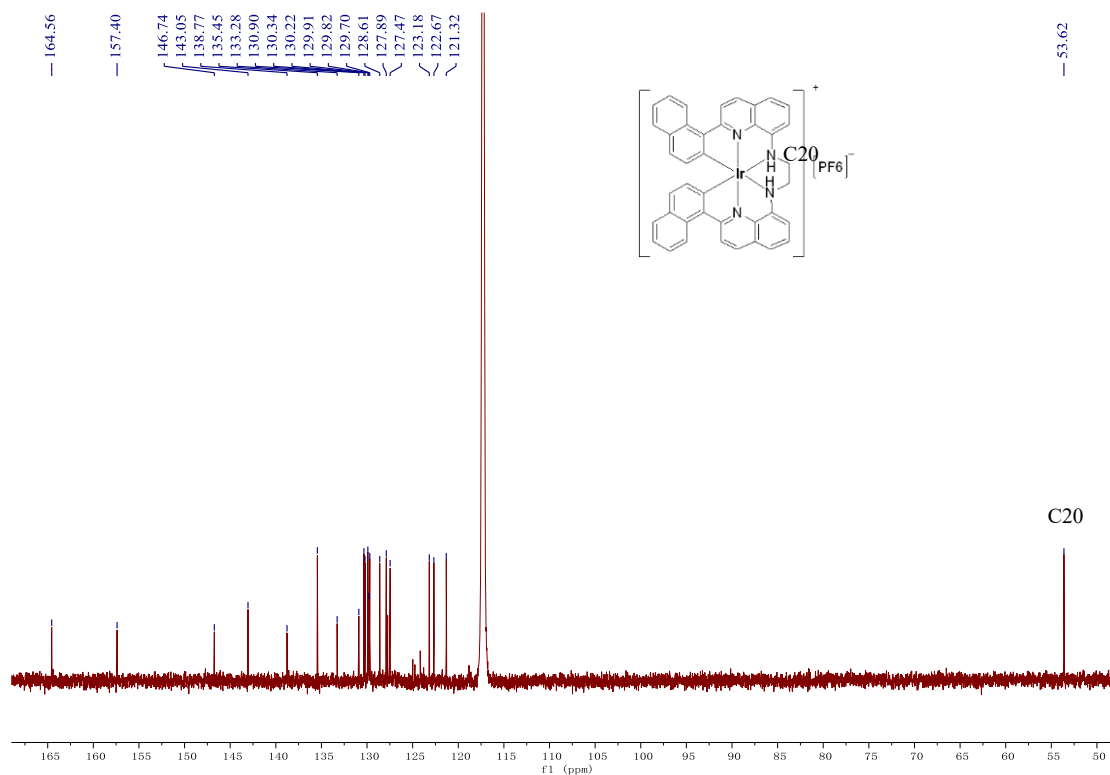

**Figure S34.** <sup>13</sup>C NMR spectra of [Ir(bnqen)](PF<sub>6</sub>) (4) in CD<sub>3</sub>CN.

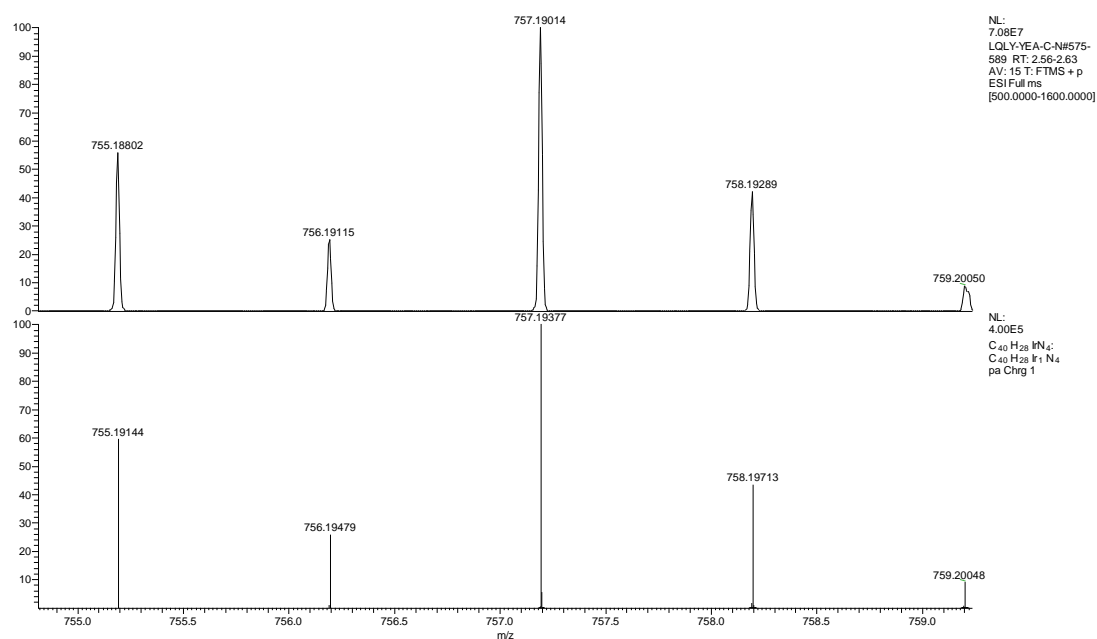

**Figure S35.** HRMS of  $[\text{Ir}(\text{bnqen})](\text{PF}_6)$  (up) and calculated for  $[\text{Ir}(\text{bnqen})]^+$  (down).

## S2. Photoluminescence diagrams

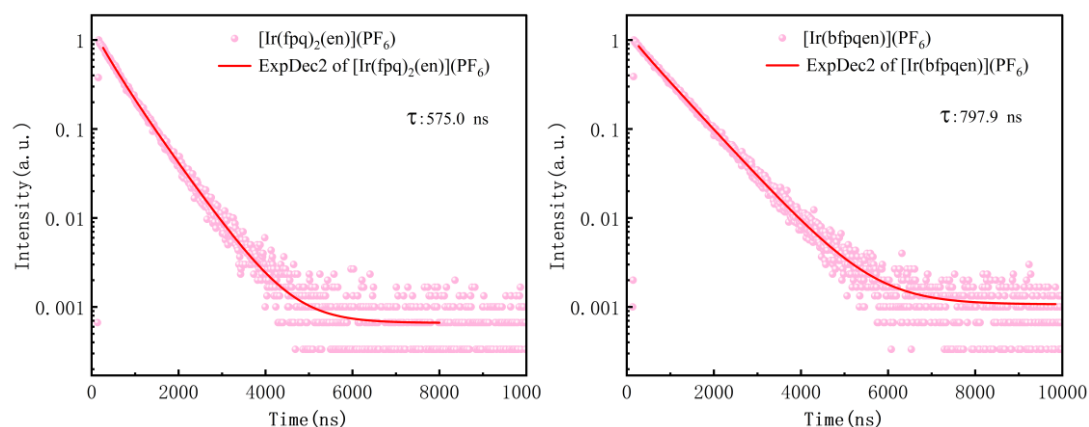

**Figure S36.** Single-wavelength decay traces for **1a** (left) and **1** (right) in Ar-saturated MeOH at room temperature.

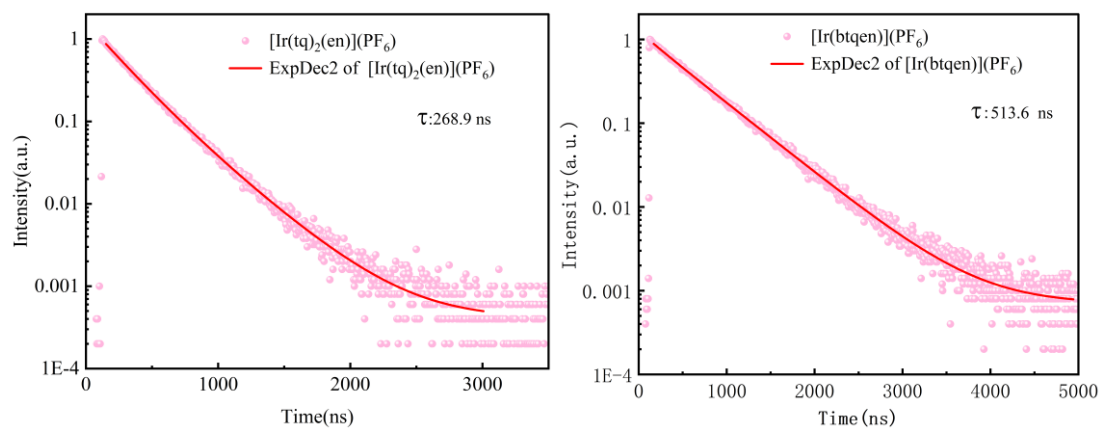

**Figure S37.** Single-wavelength decay traces for **2a** (left) and **2** (right) in Ar-saturated MeOH at room temperature.

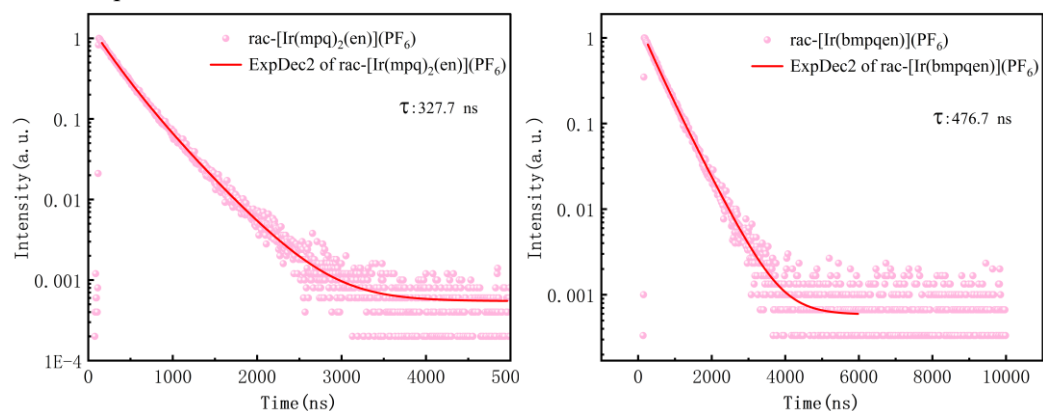

**Figure S38.** Single-wavelength decay traces for **3a** (left) and **3** (right) in Ar-saturated MeOH at room temperature.

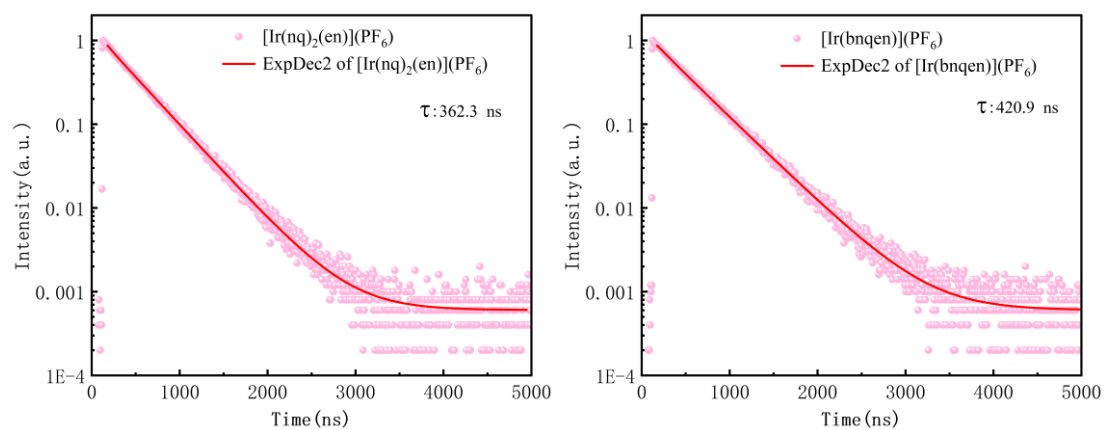

**Figure S39.** Single-wavelength decay traces for **4a** (left) and **4** (right) in Ar-saturated MeOH at room temperature.

### S3. $^1\text{H}$ NMR spectra of sulfoxides

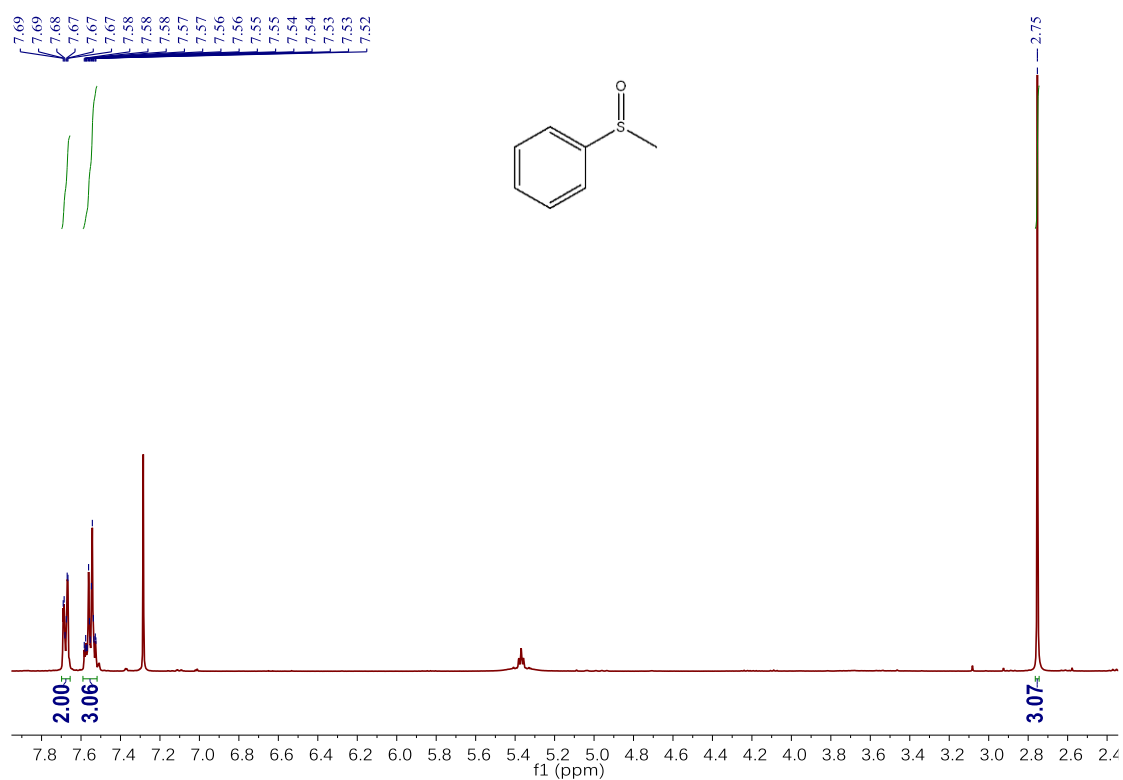

Figure S40.  $^1\text{H}$  NMR spectra of methyl phenyl sulfoxide (**6a**) in CDCl<sub>3</sub>.

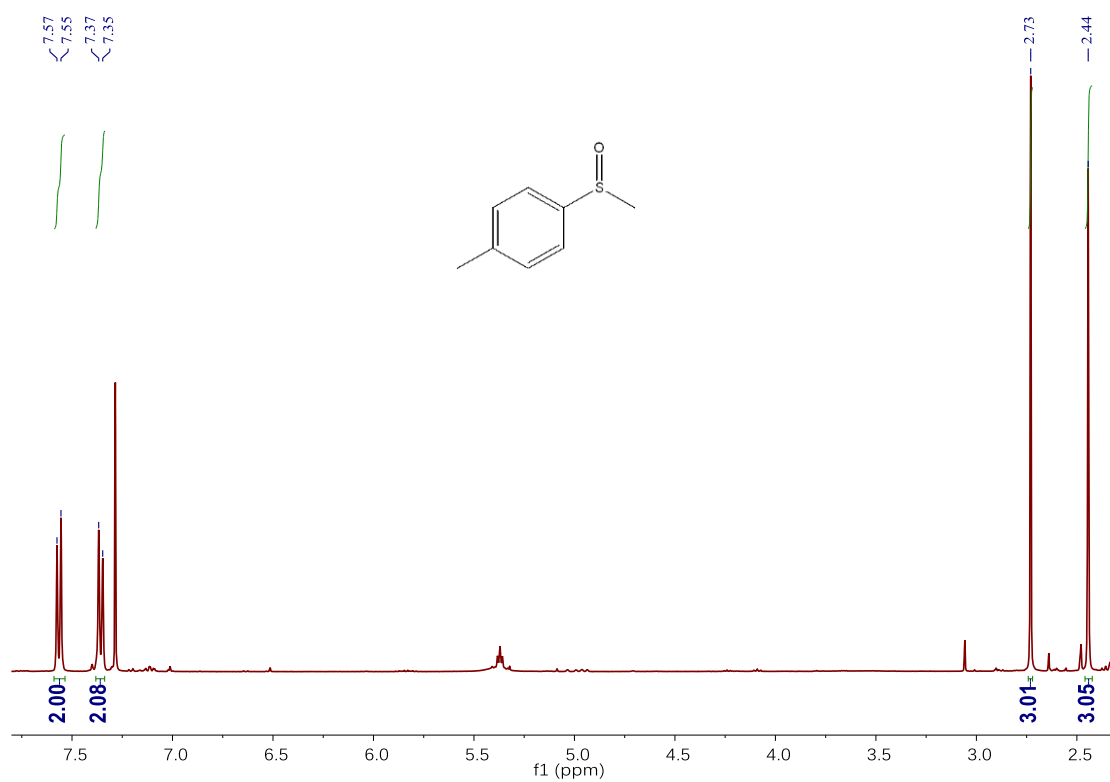

Figure S41.  $^1\text{H}$  NMR spectra of methyl 4-methylphenyl sulfoxide (**6b**) in CDCl<sub>3</sub>.

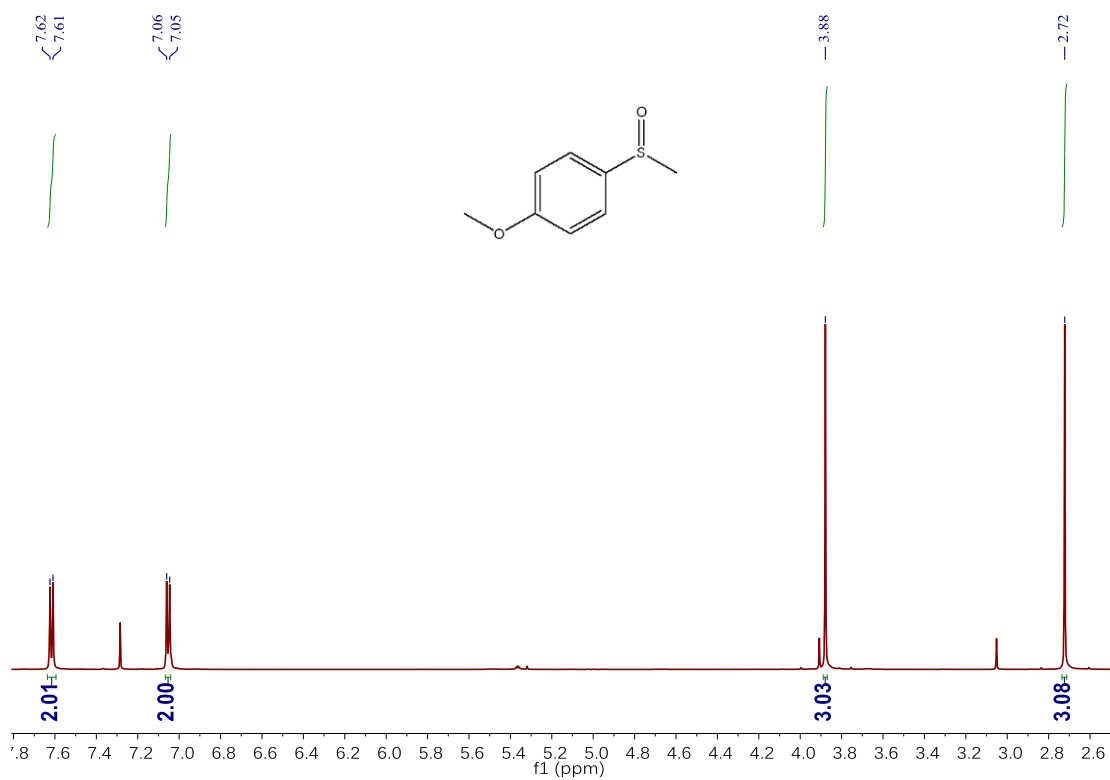

**Figure S42.** <sup>1</sup>H NMR spectra of methyl 4-methoxyphenyl sulfoxide (**6c**) in CDCl<sub>3</sub>.

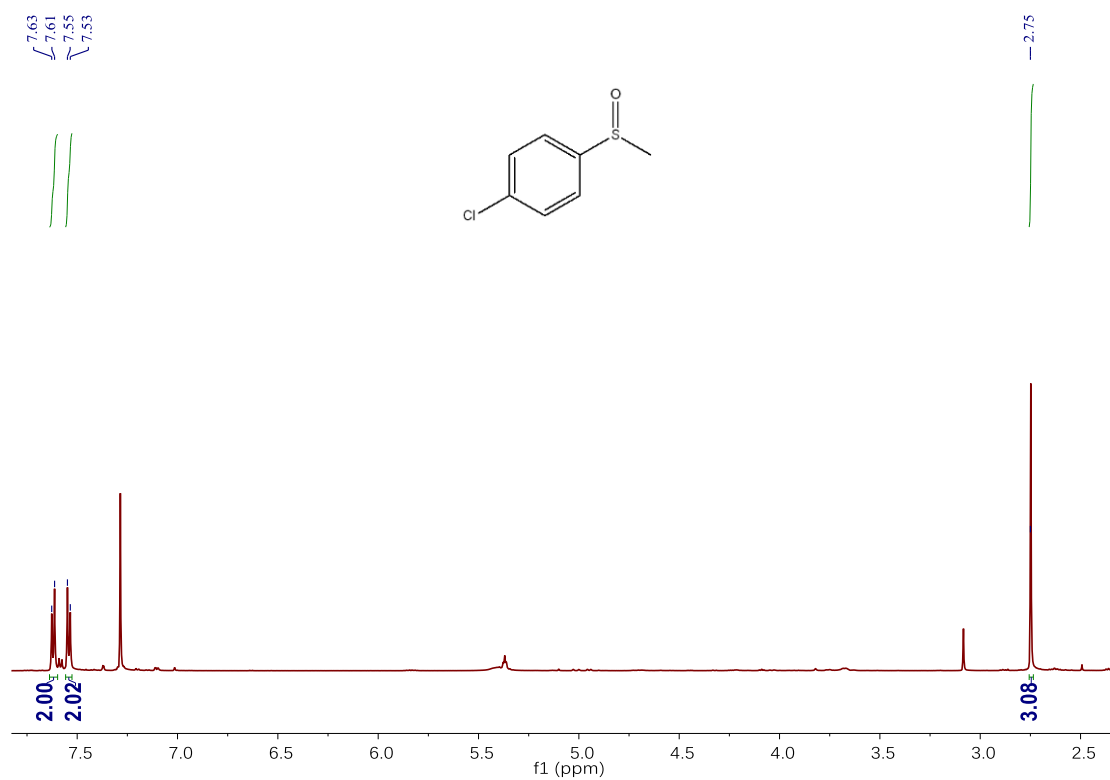

**Figure S43.** <sup>1</sup>H NMR spectra of methyl 4-chloro-phenyl sulfoxide (**6d**) in CDCl<sub>3</sub>.

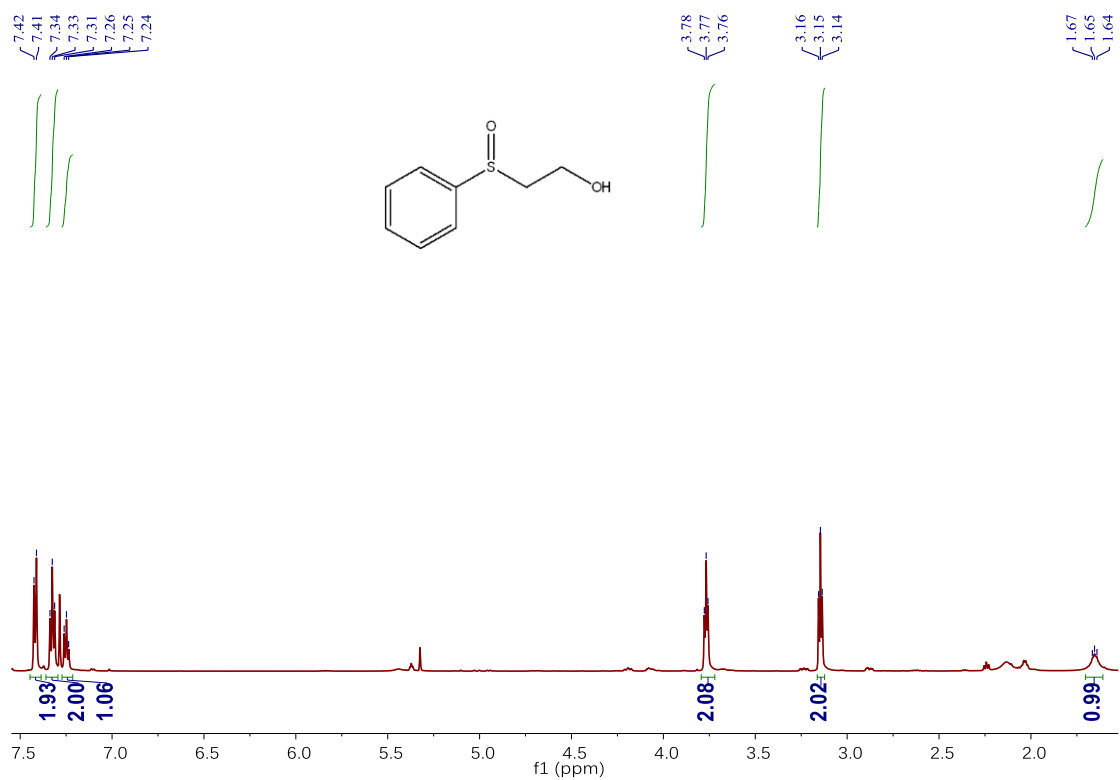

**Figure S44.** <sup>1</sup>H NMR spectra of 2-(phenylsulfinyl)ethan-1-ol (**6e**) in CDCl<sub>3</sub>.
